# Supplementary material
Source: Research Square preprint supplement (doi:10.21203/rs.3.rs-9350064/v1)
Supplement: Supplementary file 1 [file 01f3a3d3071ff5e78401f174.xlsx]

## Sheet: Sheet1
Table S5 Subclusters of DAMs during ACC and DP treatments compared to the NP treatment.
Subcluster	Metab ID	Metabolite	HMDB Superclass	HMDB Class	HMDB Subclass
1	metab_426	L-Argininium(1+)	Organic acids and derivatives	Carboxylic acids and derivatives	Amino acids, peptides, and analogues
	metab_579	L-Proline	Organic acids and derivatives	Carboxylic acids and derivatives	Amino acids, peptides, and analogues
	metab_760	2-Amino-4-[Carbamimidoyl(Methyl)Amino]Butanoic Acid	Organic acids and derivatives	Carboxylic acids and derivatives	Amino acids, peptides, and analogues
	metab_789	T-4-Aminocrotonic Acid	-	-	-
	metab_835	1-Aminocyclobutane Carboxylic Acid	-	-	-
	metab_930	2-Aminomuconic Acid Semialdehyde	Organic acids and derivatives	Carboxylic acids and derivatives	Amino acids, peptides, and analogues
	metab_931	1-(Malonylamino)Cyclopropanecarboxylic Acid	Organic acids and derivatives	Carboxylic acids and derivatives	Amino acids, peptides, and analogues
	metab_1018	(S)-5'-Deoxy-5'-(Methylsulfinyl)Adenosine	Nucleosides, nucleotides, and analogues	5''-deoxyribonucleosides	Not Available
	metab_1051	Tezacitabine	Organoheterocyclic compounds	Diazines	Pyrimidines and pyrimidine derivatives
	metab_1054	Remdesivir	Organoheterocyclic compounds	Diazanaphthalenes	Benzodiazines
	metab_1105	N-Acetylmuramate	Organic oxygen compounds	Organooxygen compounds	Carbohydrates and carbohydrate conjugates
	metab_1895	6'-Malonyl Ononin	-	-	-
	metab_1927	6,4'-Dihydroxyflavone	-	-	-
	metab_1960	Validamycin A	Organic oxygen compounds	Organooxygen compounds	Carbohydrates and carbohydrate conjugates
	metab_2094	5,4'-Dimethoxy-7-Hydroxyflavone	-	-	-
	metab_2107	(2S,3S)-2-(2,4-Difluorophenyl)-3-Methylsulfonyl-1-(1,2,4-Triazol-1-Yl)Butan-2-Ol	Benzenoids	Benzene and substituted derivatives	Phenylpropanes
	metab_2357	3-[[4-[1-(Pyridin-3-Ylmethyl)Piperidin-4-Yl]Oxypiperidin-1-Yl]Methyl]Pyridine	-	-	-
	metab_2684	Aphidicolin	Lipids and lipid-like molecules	Prenol lipids	Diterpenoids
	metab_2736	Formononetin	Phenylpropanoids and polyketides	Isoflavonoids	O-methylated isoflavonoids
	metab_2776	Annoglabasin C	Lipids and lipid-like molecules	Prenol lipids	Diterpenoids
	metab_2820	Dg(20:5(7Z,9Z,11E,13E,17Z)-3Oh(5,6,15)/I-16:0/0:0)	Not Available	Not Available	Not Available
	metab_4077	Glycitein	Phenylpropanoids and polyketides	Isoflavonoids	Isoflav-2-enes
	metab_4173	Isoimperatorin	Phenylpropanoids and polyketides	Coumarins and derivatives	Furanocoumarins
	metab_4190	4'-Hydroxy-5-Methoxyflavone	-	-	-
	metab_4288	Prunetin	Phenylpropanoids and polyketides	Isoflavonoids	O-methylated isoflavonoids
	metab_5188	Valylproline	Organic acids and derivatives	Carboxylic acids and derivatives	Amino acids, peptides, and analogues
	metab_5488	Dl-Asparagine	Organic acids and derivatives	Carboxylic acids and derivatives	Amino acids, peptides, and analogues
	metab_5647	Beta-Alanine	Organic acids and derivatives	Carboxylic acids and derivatives	Amino acids, peptides, and analogues
	metab_5662	Cycloleucine	Organic acids and derivatives	Carboxylic acids and derivatives	Amino acids, peptides, and analogues
	metab_5675	(+)-Threo-2-Amino-3,4-Dihydroxybutanoic Acid	Organic acids and derivatives	Carboxylic acids and derivatives	Amino acids, peptides, and analogues
	metab_5821	L-Asparagine	Organic acids and derivatives	Carboxylic acids and derivatives	Amino acids, peptides, and analogues
	metab_5826	2-Pyrrolidinone	Organoheterocyclic compounds	Pyrrolidines	Pyrrolidones
	metab_6729	3-Ureidopropionic Acid	Organic acids and derivatives	Organic carbonic acids and derivatives	Ureas
	metab_7455	Ferene Triazine	Organoheterocyclic compounds	Triazines	1,2,4-triazines
	metab_8873	Neoliquiritin	Phenylpropanoids and polyketides	Flavonoids	Flavonoid glycosides
	metab_9286	Azelaic Acid	Lipids and lipid-like molecules	Fatty Acyls	Fatty acids and conjugates
	metab_9359	Liquiritigenin	Phenylpropanoids and polyketides	Flavonoids	Flavans
	metab_9433	(-)-Medicarpin	Phenylpropanoids and polyketides	Isoflavonoids	Not Available
	metab_9499	Isosakuranetin	Phenylpropanoids and polyketides	Flavonoids	O-methylated flavonoids
	metab_9573	Apigenin	Phenylpropanoids and polyketides	Flavonoids	Flavones
	metab_9747	3-O-Methylkaempferol	Phenylpropanoids and polyketides	Flavonoids	O-methylated flavonoids
	metab_10042	Oroxylin A	-	-	-
	metab_10046	7,2'-Dihydroxyflavone	-	-	-
	metab_11302	Norizalpinin	Phenylpropanoids and polyketides	Flavonoids	Flavones
	metab_11303	7-Hydroxy-2'-Methoxyisoflavone	-	-	-
	metab_11305	(2R,3R)-Pinobanksin	Phenylpropanoids and polyketides	Flavonoids	Flavans
	metab_11378	Rubiadin	Benzenoids	Anthracenes	Anthraquinones
	metab_11646	Biochanin A	Phenylpropanoids and polyketides	Isoflavonoids	O-methylated isoflavonoids
	metab_11707	(2E)-2-[Hydroxy(Phenyl)Methylidene]-6-Methoxy-1-Benzofuran-3-One	-	-	-
	metab_11712	Pratol	-	-	-
	metab_11714	P-Coumaroyltriacetic Acid Lactone	Phenylpropanoids and polyketides	Cinnamic acids and derivatives	Hydroxycinnamic acids and derivatives
	metab_11727	3-(5-Acetyl-2-Furyl)-5-Methoxy-2-Benzofuran-1(3H)-One	-	-	-
	metab_11950	Diosmetin	Phenylpropanoids and polyketides	Flavonoids	O-methylated flavonoids
	metab_11963	7,4'-Dihydroxyflavone	Phenylpropanoids and polyketides	Flavonoids	Flavones
	metab_12189	Phloretin	Phenylpropanoids and polyketides	Linear 1,3-diarylpropanoids	Chalcones and dihydrochalcones
	metab_12506	2-Amino-N-[1-[[2-[[1-(2-Hydroxyethylamino)-1-Oxo-3-Phenylpropan-2-Yl]-Methylamino]-2-Oxoethyl]Amino]-1-Oxopropan-2-Yl]-3-(4-Hydroxyphenyl)Propanamide	Organic acids and derivatives	Carboxylic acids and derivatives	Amino acids, peptides, and analogues
	metab_13385	Integerrimine	Phenylpropanoids and polyketides	Macrolides and analogues	Not Available
	metab_13496	Methyl 3-Benzoyloxy-8-(3-Hydroxypropyl)-8-Azabicyclo[3.2.1]Octane-2-Carboxylate	Benzenoids	Benzene and substituted derivatives	Benzoic acids and derivatives
	metab_13814	(S)-5-(4-Hydroxy-4-Methylisoxazolidine-2-Carbonyl)-1-Isopropyl-3-Methyl-6-((3-Methyl-5-(Trifluoromethyl)-1H-Pyrazol-4-Yl)Methyl)Thieno[2,3-D]Pyrimidine-2,4(1H,3H)-Dione	Organoheterocyclic compounds	Thienopyrimidines	Not Available
	metab_13867	Coptisine	-	-	-
	metab_13983	6-Oxopiperidine-2-Carboxylic Acid	Organic acids and derivatives	Carboxylic acids and derivatives	Amino acids, peptides, and analogues
	metab_14236	Malonic Acid	Organic acids and derivatives	Carboxylic acids and derivatives	Dicarboxylic acids and derivatives
	metab_14481	Galactaric Acid	Organic oxygen compounds	Organooxygen compounds	Carbohydrates and carbohydrate conjugates
	metab_14528	Alpha-D-Glucose	Organic oxygen compounds	Organooxygen compounds	Carbohydrates and carbohydrate conjugates
	metab_14530	Gulonic Acid	Organic acids and derivatives	Hydroxy acids and derivatives	Medium-chain hydroxy acids and derivatives
	metab_14653	3-Cyano-L-Alanine	Organic acids and derivatives	Carboxylic acids and derivatives	Amino acids, peptides, and analogues
2	metab_600	Proline Betaine	Organic acids and derivatives	Carboxylic acids and derivatives	Amino acids, peptides, and analogues
	metab_842	Valeric Acid	Lipids and lipid-like molecules	Fatty Acyls	Fatty acids and conjugates
	metab_919	1-[(2R,3S,5R)-3,4-Dihydroxy-5-(Hydroxymethyl)Oxolan-2-Yl]Pyrimidine-2,4-Dione	Nucleosides, nucleotides, and analogues	Pyrimidine nucleosides	Not Available
	metab_1164	Thymine	Organoheterocyclic compounds	Diazines	Pyrimidines and pyrimidine derivatives
	metab_1214	Glu Leu	-	-	-
	metab_1589	Astilbin	Phenylpropanoids and polyketides	Flavonoids	Flavonoid glycosides
	metab_1597	Bursin	Organic acids and derivatives	Carboxylic acids and derivatives	Amino acids, peptides, and analogues
	metab_1696	6-Hydroxynon-7-Enoylcarnitine	Lipids and lipid-like molecules	Fatty Acyls	Fatty acid esters
	metab_1737	3-Hydroxynona-5,7-Dienoylcarnitine	Lipids and lipid-like molecules	Fatty Acyls	Fatty acid esters
	metab_2009	Cuneatin Methyl Ether	-	-	-
	metab_2122	16-B1-Phytoprostane	Lipids and lipid-like molecules	Fatty Acyls	Eicosanoids
	metab_2284	Pip(Pgj2/18:0)	Not Available	Not Available	Not Available
	metab_3393	Glabranin	Lipids and lipid-like molecules	Fatty Acyls	Fatty alcohols
	metab_3892	Pga3	-	-	-
	metab_3942	Derrustone	-	-	-
	metab_4697	6-Hydroxydodeca-8,10-Dienoylcarnitine	Lipids and lipid-like molecules	Fatty Acyls	Fatty acid esters
	metab_4834	Gamma-Glutamylphenylalanine	Organic acids and derivatives	Carboxylic acids and derivatives	Amino acids, peptides, and analogues
	metab_5138	1-Methylguanosine	Nucleosides, nucleotides, and analogues	Purine nucleosides	Not Available
	metab_5272	Isoguanosine	-	-	-
	metab_5355	Uracil	Organoheterocyclic compounds	Diazines	Pyrimidines and pyrimidine derivatives
	metab_6862	Gluconolactone	Organic oxygen compounds	Organooxygen compounds	Carbohydrates and carbohydrate conjugates
	metab_7312	Daucic Acid	Organic acids and derivatives	Hydroxy acids and derivatives	Beta hydroxy acids and derivatives
	metab_7462	Guanosine	Nucleosides, nucleotides, and analogues	Purine nucleosides	Not Available
	metab_7550	Pseudouridine	Nucleosides, nucleotides, and analogues	Nucleoside and nucleotide analogues	Not Available
	metab_7662	3-Fluorophenmetrazine	Organoheterocyclic compounds	Oxazinanes	Morpholines
	metab_7666	Glutamylisoleucine	Organic acids and derivatives	Carboxylic acids and derivatives	Amino acids, peptides, and analogues
	metab_9343	(3S)-3-Hydroxycyclocitral	Organic oxygen compounds	Organooxygen compounds	Alcohols and polyols
	metab_9438	Tetranorprostanedioic Acid	Lipids and lipid-like molecules	Fatty Acyls	Fatty acids and conjugates
	metab_9478	Eremopetasidione	Lipids and lipid-like molecules	Prenol lipids	Sesquiterpenoids
	metab_9578	Blumenol C Glucoside	Lipids and lipid-like molecules	Fatty Acyls	Fatty acyl glycosides
	metab_9782	16-Hydroxy-9-Oxooctadeca-10,12,14-Trienoic Acid	-	-	-
	metab_9809	Polypodosaponin	Lipids and lipid-like molecules	Steroids and steroid derivatives	Steroidal glycosides
	metab_9837	13-Hpotre	-	-	-
	metab_9855	5,7-Megastigmadien-9-Ol Glucoside	Lipids and lipid-like molecules	Fatty Acyls	Fatty acyl glycosides
	metab_9885	13-Hydroxyoctadeca-6,9,11-Trienoic Acid	-	-	-
	metab_9895	Grandifloric Acid	-	-	-
	metab_10034	(Z)-3-Methyl-2-(2-Pentenyl)-2-Cyclopenten-1-One	Organic oxygen compounds	Organooxygen compounds	Carbonyl compounds
	metab_10048	Capsiate	Benzenoids	Phenols	Methoxyphenols
	metab_10050	(+/-)13-Hpode	-	-	-
	metab_10053	Cibaric Acid	Lipids and lipid-like molecules	Fatty Acyls	Lineolic acids and derivatives
	metab_10054	(11E,15Z)-9,10,13-Trihydroxy-11,15-Octadecadienoic Acid	-	-	-
	metab_10069	9-Hydroxy-7-Megastigmen-3-One Glucoside	Lipids and lipid-like molecules	Fatty Acyls	Fatty acyl glycosides
	metab_10222	Cer(D18:1/12:0)	Lipids and lipid-like molecules	Sphingolipids	Ceramides
	metab_10232	Heptaethylene Glycol Monododecyl Ether	Organic oxygen compounds	Organooxygen compounds	Ethers
	metab_10237	Pe(22:4(7Z,10Z,13Z,16Z)/18:0)	Lipids and lipid-like molecules	Glycerophospholipids	Glycerophosphoethanolamines
	metab_10339	Cer[As](D34:1)	-	-	-
	metab_11034	Cer(D18:1/14:0)	Lipids and lipid-like molecules	Sphingolipids	Ceramides
	metab_11073	Soyacerebroside I	Lipids and lipid-like molecules	Sphingolipids	Glycosphingolipids
	metab_11077	Cer(D16:1/16:0)	Lipids and lipid-like molecules	Sphingolipids	Ceramides
	metab_11101	Galactosylceramide (D18:1/14:0)	Lipids and lipid-like molecules	Sphingolipids	Glycosphingolipids
	metab_11110	As 1-2	Lipids and lipid-like molecules	Sphingolipids	Glycosphingolipids
	metab_11147	As 1-1	Lipids and lipid-like molecules	Sphingolipids	Glycosphingolipids
	metab_11178	Ricinoleic Acid	Lipids and lipid-like molecules	Fatty Acyls	Fatty acids and conjugates
	metab_11198	1-A,24R,25-Trihydroxyvitamin D2	Lipids and lipid-like molecules	Steroids and steroid derivatives	Vitamin D and derivatives
	metab_11213	(8S,9S,10S,11S,13S,14S,17R)-11,17-Dihydroxy-17-(2-Hydroxyacetyl)-10,13-Dimethyl-1,4,5,6,7,8,9,11,12,14,15,16-Dodecahydrocyclopenta[A]Phenanthrene-2,3-Dione	Lipids and lipid-like molecules	Steroids and steroid derivatives	Hydroxysteroids
	metab_11273	Pgk2	-	-	-
	metab_11288	2,3-Dinor Prostaglandin E1	-	-	-
	metab_11293	Gamma-13(S)-Hpotre	-	-	-
	metab_11297	8-(3-Oxo-2-(Pent-2-Enyl) Cyclopentenyl)Octanoic Acid	-	-	-
	metab_11307	5-Heptyltetrahydro-2-Oxo-3-Furancarboxylic Acid	Organoheterocyclic compounds	Lactones	Gamma butyrolactones
	metab_11318	9,10-Epoxystearic Acid	Lipids and lipid-like molecules	Fatty Acyls	Lineolic acids and derivatives
	metab_11422	9(10)-Epode	Lipids and lipid-like molecules	Fatty Acyls	Fatty acids and conjugates
	metab_11461	Coronaric Acid	Lipids and lipid-like molecules	Fatty Acyls	Fatty acids and conjugates
	metab_11464	2,3,23-Triacetylsericic Acid	Lipids and lipid-like molecules	Prenol lipids	Triterpenoids
	metab_11500	9-Oxootre	-	-	-
	metab_11518	(+/-)9-Hpode	-	-	-
	metab_11523	15-Keto-Prostaglandin E2	Lipids and lipid-like molecules	Fatty Acyls	Eicosanoids
	metab_11586	Soyasapogenol B Base+O-Hexa-Hexa-Hex+Me+Acetyl	-	-	-
	metab_11658	Fa(18:5+2O)	-	-	-
	metab_11694	12S-Hht	Lipids and lipid-like molecules	Fatty Acyls	Fatty acids and conjugates
	metab_11695	Lactarorufin A	-	-	-
	metab_11915	20-Carboxy-Ltb4	-	-	-
	metab_12057	Jaceosidin	-	-	-
	metab_12819	Flavanomarein	-	-	-
	metab_13130	2',3,4',5-Tetrahydroxy-4-Prenylstilbene	Phenylpropanoids and polyketides	Stilbenes	Not Available
	metab_13544	Apiosylglucosyl 4-Hydroxybenzoate	Organic oxygen compounds	Organooxygen compounds	Carbohydrates and carbohydrate conjugates
	metab_13696	7-Aminocephalosporanic Acid	Organic acids and derivatives	Carboxylic acids and derivatives	Amino acids, peptides, and analogues
	metab_13863	Deoxyguanosine	Nucleosides, nucleotides, and analogues	Purine nucleosides	Purine 2''-deoxyribonucleosides
	metab_14002	Uridine	Nucleosides, nucleotides, and analogues	Pyrimidine nucleosides	Not Available
	metab_14616	Ala-Gly	Organic acids and derivatives	Carboxylic acids and derivatives	Amino acids, peptides, and analogues
3	metab_619	Cytarabine	Nucleosides, nucleotides, and analogues	Pyrimidine nucleosides	Not Available
	metab_630	Cytosine	Organoheterocyclic compounds	Diazines	Pyrimidines and pyrimidine derivatives
	metab_633	1H-Pyrazolo[3,4-D]Pyrimidin-4-Amine	Organoheterocyclic compounds	Pyrazolopyrimidines	Pyrazolo[3,4-d]pyrimidines
	metab_636	8-Hydroxyadenine	Organoheterocyclic compounds	Imidazopyrimidines	Purines and purine derivatives
	metab_796	6-Hydroxy-2-Aminopurine	Organoheterocyclic compounds	Imidazopyrimidines	Purines and purine derivatives
	metab_1559	Spectinomycin	Organoheterocyclic compounds	Dioxanes	1,4-dioxanes
	metab_2633	Dg(22:4(7Z,10Z,13Z,16Z)/18:4(6Z,9Z,12Z,15Z)/0:0)	Lipids and lipid-like molecules	Glycerolipids	Diradylglycerols
	metab_2876	Pa(20:3(6,8,11)-Oh(5)/P-16:0)	Not Available	Not Available	Not Available
	metab_2881	Dg(9D3/9D3/0:0)	Lipids and lipid-like molecules	Fatty Acyls	Fatty acids and conjugates
	metab_2943	Dg(15:0/18:4(6Z,9Z,12Z,15Z)/0:0)	Lipids and lipid-like molecules	Fatty Acyls	Lineolic acids and derivatives
	metab_3411	Dg(16:0/Pge2/0:0)	Not Available	Not Available	Not Available
	metab_3442	Dg(I-16:0/20:4(6E,8Z,11Z,13E)-2Oh(5S,15S)/0:0)	Not Available	Not Available	Not Available
	metab_3556	Dg(18:4(6Z,9Z,12Z,15Z)/22:5(7Z,10Z,13Z,16Z,19Z)/0:0)	Lipids and lipid-like molecules	Glycerolipids	Diradylglycerols
	metab_3557	Sm(D18:1/12:0)	Lipids and lipid-like molecules	Sphingolipids	Phosphosphingolipids
	metab_5155	2-O-Methyladenosine	Nucleosides, nucleotides, and analogues	Purine nucleosides	Not Available
	metab_5421	Methyldopate	Benzenoids	Benzene and substituted derivatives	Phenethylamines
	metab_5462	Isocytosine	-	-	-
	metab_8390	Zabicipril	Organic acids and derivatives	Carboxylic acids and derivatives	Amino acids, peptides, and analogues
	metab_10449	Pa(18:1(12Z)-2Oh(9,10)/18:3(6Z,9Z,12Z))	Not Available	Not Available	Not Available
	metab_13727	3'-O-Methylguanosine	Nucleosides, nucleotides, and analogues	Purine nucleosides	Not Available
	metab_13794	Spongothymidine	-	-	-
	metab_14138	Adenine	Organoheterocyclic compounds	Imidazopyrimidines	Purines and purine derivatives
4	metab_1002	Deoxyadenosine	Nucleosides, nucleotides, and analogues	Purine nucleosides	Purine 2''-deoxyribonucleosides
	metab_2238	Hoduloside Iv	Lipids and lipid-like molecules	Prenol lipids	Triterpenoids
	metab_2700	Farnesyl Acetone	-	-	-
	metab_2893	Erucamide	-	-	-
	metab_3598	(8R,9R,10S,13S,14S)-13-Methyl-1,4,5,6,7,8,9,10,11,12,14,15,16,17-Tetradecahydrocyclopenta[A]Phenanthrene	Lipids and lipid-like molecules	Steroids and steroid derivatives	Estrane steroids
	metab_4067	Araliasaponin I	Lipids and lipid-like molecules	Prenol lipids	Terpene glycosides
	metab_5395	Ecgonine	Alkaloids and derivatives	Tropane alkaloids	Not Available
	metab_6073	Cyclophosphamide	Organic nitrogen compounds	Organonitrogen compounds	Nitrogen mustard compounds
	metab_6078	2-(6-Hydroxy-4-Oxo-2-Sulfanylidene-1H-Pyrimidin-5-Yl)Propanedial	Organoheterocyclic compounds	Diazines	Pyrimidines and pyrimidine derivatives
	metab_7303	2-Furoic Acid	Organoheterocyclic compounds	Furans	Furoic acid and derivatives
	metab_7306	Citric Acid	Organic acids and derivatives	Carboxylic acids and derivatives	Tricarboxylic acids and derivatives
	metab_7373	Itaconic Acid	Lipids and lipid-like molecules	Fatty Acyls	Fatty acids and conjugates
	metab_8057	Methionine Glutamate	Organic acids and derivatives	Carboxylic acids and derivatives	Amino acids, peptides, and analogues
	metab_8575	Salviaflaside Methyl Ester	Organic oxygen compounds	Organooxygen compounds	Carbohydrates and carbohydrate conjugates
	metab_8649	Patulin	Organoheterocyclic compounds	Pyrans	Not Available
	metab_9683	Geranic Acid	Lipids and lipid-like molecules	Prenol lipids	Monoterpenoids
	metab_9720	Akebia Saponin D	Lipids and lipid-like molecules	Prenol lipids	Terpene glycosides
	metab_9959	Vernolic Acid	Lipids and lipid-like molecules	Fatty Acyls	Fatty acids and conjugates
	metab_9961	13-Hydroxy-9-Methoxy-10-Oxo-11-Octadecenoic Acid	Lipids and lipid-like molecules	Fatty Acyls	Lineolic acids and derivatives
	metab_10137	2,3-Dinor-Txb1	Lipids and lipid-like molecules	Fatty Acyls	Fatty acids and conjugates
	metab_11325	Dg(Pgd1/0:0/I-13:0)	Not Available	Not Available	Not Available
	metab_11667	Dihydrocytochalasin B	Alkaloids and derivatives	Cytochalasans	Cytochalasins
	metab_12291	Epigallocatechin Gallate	Phenylpropanoids and polyketides	Flavonoids	Flavans
	metab_13993	Aconitic Acid	Organic acids and derivatives	Carboxylic acids and derivatives	Tricarboxylic acids and derivatives
5	metab_2874	Pa(16:1(9Z)/18:1(12Z)-2Oh(9,10))	Not Available	Not Available	Not Available
	metab_6860	Glycerophosphoinositol	Lipids and lipid-like molecules	Glycerophospholipids	Glycerophosphoinositols
	metab_7322	Pseudouridine 5'-Phosphate	Organic oxygen compounds	Organooxygen compounds	Carbohydrates and carbohydrate conjugates
	metab_7445	3',5'-Cyclic Gmp	Nucleosides, nucleotides, and analogues	Purine nucleotides	Cyclic purine nucleotides
	metab_7497	5'-Guanylic Acid	Nucleosides, nucleotides, and analogues	Purine nucleotides	Purine ribonucleotides
	metab_13912	Gdp-D-Rhamnose	Nucleosides, nucleotides, and analogues	Purine nucleotides	Purine nucleotide sugars
	metab_14005	Uridine 5'-Monophosphate	Nucleosides, nucleotides, and analogues	Pyrimidine nucleotides	Pyrimidine ribonucleotides
	metab_14522	D-Galactose 1-Phosphate	-	-	-
