# Supplementary material
Source: Research Square preprint supplement (doi:10.21203/rs.3.rs-9350064/v1)
Supplement: Supplementary file 2 [file 253c4093d43f65d784d466a3.xlsx]

## Sheet: Sheet1
Table S1. Primers used for qRT-PCR validation
Gene name	Abbreviation	Gene NO.	Primer-F (5'-3')	Primer-R (5'-3')
putative SPX domain-containing protein	SPX	MsG0180004121.01	AAATATCATTAAGGTCCGTGTGTTT	GTTCAAAGCTTCTCCTCTCCCA
inorganic phosphate transporter 1-4	PHT1-4	MsG0780040738.01	CACCATCGTACGCAGTTGAC	TAAGTCATTGCAGCCGGGAG
1-aminocyclopropane-1-carboxylate oxidase	ACO	MsG0480019352.01	GAGGTAATGGCAAGCAAAACCA	AAGTATCGCCTAGCTTCGCA
probable WRKY transcription factor 40	WRKY40	MsG0280008324.01	GGTATACCCCGAACCCGTC	GTTTCCCTGTTACCCTGCCC
sucrose synthase 5-like isoform X5	SS5	MsG0280006583.01	CACGGAGTTAACTATTCGTTTTCA	CGACGTTGAAGTTGACCACC
ethylene-responsive transcription factor 2	ERF2	MsG0780041015.01	CAAGAGGCAACTCACCCAGA	TGCGATACCGGAACCTGAAC
expansin-A4	expansin-A4	MsG0180003836.01	GAGGAGGAAGAAGGGTTTGGT	ACCTCTCATTGAAAATGCAGC
aquaporin TIP2-1	TIP2-1	MsG0380015362.01	GTAGCGGCGTTGCTATTCCT	TCCCAATAGATCACGCGCC
transcription factor WRKY2	WRKY2	MsG0380013579.01	ACTTCTTGCCACAGCAGGAG	ACACCATAAAGTGCAACCCCT
