# Supplementary material
Source: Research Square preprint supplement (doi:10.21203/rs.3.rs-9350064/v1)
Supplement: Supplementary file 3 [file 2619d731e2f220e8fd9c21f7.xlsx]

## Sheet: Table S3A
Table S3A Statistics of differentially expressed genes (DEGs) in different group
Gene Name	Gene Description	TDP_vs_TNP	TACC1_vs_TNP	TACC10_vs_TNP	TACC100_vs_TNP	Sum
MsG0880042291.01	1-deoxy-D-xylulose 5-phosphate reductoisomerase(IPR003821)|1-deoxy-D-xylulose 5-phosphate reductoisomerase, N-terminal(IPR013512)|1-deoxy-D-xylulose 5-phosphate reductoisomerase, C-terminal(IPR013644)|DXP reductoisomerase C-terminal domain(IPR026877)|DXP reductoisomerase, C-terminal domain superfamily(IPR036169)|NAD(P)-binding domain superfamily(IPR036291)	no|down	no|down	no|down	yes|down	1
MsG0280011056.01	2Fe-2S ferredoxin-type iron-sulfur binding domain(IPR001041)|2Fe-2S ferredoxin, iron-sulphur binding site(IPR006058)|Beta-grasp domain superfamily(IPR012675)|2Fe-2S ferredoxin-like superfamily(IPR036010)	no|down	yes|down	yes|down	no|down	2
MsG0480020534.01	2Fe-2S ferredoxin-type iron-sulfur binding domain(IPR001041)|2Fe-2S ferredoxin, iron-sulphur binding site(IPR006058)|Ferredoxin [2Fe-2S], plant(IPR010241)|Beta-grasp domain superfamily(IPR012675)|2Fe-2S ferredoxin-like superfamily(IPR036010)	no|up	no|up	no|up	yes|up	1
MsG0280011276.01	2Fe-2S ferredoxin-type iron-sulfur binding domain(IPR001041)|Beta-grasp domain superfamily(IPR012675)|2Fe-2S ferredoxin-like superfamily(IPR036010)	no|down	no|down	yes|down	yes|down	2
MsG0280008178.01	2S globulin(IPR000677)|Glycoside hydrolase family 18, catalytic domain(IPR001223)|Glycoside hydrolase superfamily(IPR017853)	no|down	no|down	yes|down	yes|down	2
MsG0280008180.01	2S globulin(IPR000677)|Glycoside hydrolase family 18, catalytic domain(IPR001223)|Glycoside hydrolase superfamily(IPR017853)	no|down	yes|down	yes|down	yes|down	3
MsG0280008177.01	2S globulin(IPR000677)|Glycoside hydrolase family 18, catalytic domain(IPR001223)|Glycoside hydrolase, chitinase active site(IPR001579)|Glycoside hydrolase superfamily(IPR017853)	no|down	no|up	yes|down	yes|down	2
MsG0280008184.01	2S globulin(IPR000677)|Glycoside hydrolase family 18, catalytic domain(IPR001223)|Glycoside hydrolase, chitinase active site(IPR001579)|Glycoside hydrolase superfamily(IPR017853)	no|down	no|down	yes|down	no|down	1
MsG0580025511.01	3-beta hydroxysteroid dehydrogenase/isomerase(IPR002225)|NAD(P)-binding domain superfamily(IPR036291)	yes|up	yes|up	yes|up	yes|up	4
MsG0480022055.01	3-beta hydroxysteroid dehydrogenase/isomerase(IPR002225)|NAD(P)-binding domain superfamily(IPR036291)	no|down	yes|down	yes|down	yes|down	3
MsG0280011162.01	3-hydroxyisobutyrate dehydrogenase-related, conserved site(IPR002204)|6-phosphogluconate dehydrogenase, NADP-binding(IPR006115)|6-phosphogluconate dehydrogenase-like, C-terminal domain superfamily(IPR008927)|6-phosphogluconate dehydrogenase, domain 2(IPR013328)|3-hydroxyisobutyrate dehydrogenase-related(IPR015815)|3-hydroxyisobutyrate dehydrogenase, NAD-binding domain(IPR029154)|NAD(P)-binding do…	no|down	yes|down	no|down	no|down	1
MsG0580029692.01	4-hydroxyphenylpyruvate dioxygenase(IPR005956)|Glyoxalase/Bleomycin resistance protein/Dihydroxybiphenyl dioxygenase(IPR029068)	no|down	no|down	yes|down	no|down	1
MsG0180002208.01	4'-phosphopantetheinyl transferase domain(IPR008278)|4'-phosphopantetheinyl transferase domain superfamily(IPR037143)	no|down	yes|down	no|down	no|down	1
MsG0480023662.01	6-phosphogluconate dehydrogenase, decarboxylating(IPR006113)|6-phosphogluconate dehydrogenase, C-terminal(IPR006114)|6-phosphogluconate dehydrogenase, NADP-binding(IPR006115)|6-phosphogluconate dehydrogenase(IPR006183)|6-phosphogluconate dehydrogenase-like, C-terminal domain superfamily(IPR008927)|6-phosphogluconate dehydrogenase, domain 2(IPR013328)|NAD(P)-binding domain superfamily(IPR036291)	no|up	yes|up	no|up	no|up	1
MsG0180000983.01	6-phosphogluconolactonase, DevB-type(IPR005900)|Glucosamine/galactosamine-6-phosphate isomerase(IPR006148)|NagB/RpiA transferase-like(IPR037171)	no|up	no|down	yes|down	yes|down	2
MsG0180000984.01	6-phosphogluconolactonase, DevB-type(IPR005900)|Glucosamine/galactosamine-6-phosphate isomerase(IPR006148)|NagB/RpiA transferase-like(IPR037171)	no|down	no|down	yes|down	yes|down	2
MsG0780041782.01	AAA+ ATPase domain(IPR003593)|ATPase, AAA-type, core(IPR003959)|AAA-type ATPase, N-terminal domain(IPR025753)|P-loop containing nucleoside triphosphate hydrolase(IPR027417)	no|up	yes|up	yes|up	no|up	2
MsG0180000153.01	AAA+ ATPase domain(IPR003593)|ATPase, AAA-type, core(IPR003959)|ATPase, AAA-type, conserved site(IPR003960)|AAA-type ATPase, N-terminal domain(IPR025753)|P-loop containing nucleoside triphosphate hydrolase(IPR027417)	no|down	yes|down	no|down	yes|down	2
MsG0780036147.01	AAA+ ATPase domain(IPR003593)|ATPase, AAA-type, core(IPR003959)|ATPase, AAA-type, conserved site(IPR003960)|AAA-type ATPase, N-terminal domain(IPR025753)|P-loop containing nucleoside triphosphate hydrolase(IPR027417)	no|up	no|up	yes|up	yes|up	2
MsG0580024999.01	AAA+ ATPase domain(IPR003593)|ATPase, AAA-type, core(IPR003959)|ATPase, AAA-type, conserved site(IPR003960)|AAA-type ATPase, N-terminal domain(IPR025753)|P-loop containing nucleoside triphosphate hydrolase(IPR027417)	no|up	yes|up	yes|up	yes|up	3
MsG0680030696.01	AAA+ ATPase domain(IPR003593)|ATPase, AAA-type, core(IPR003959)|ATPase, AAA-type, conserved site(IPR003960)|AAA-type ATPase, N-terminal domain(IPR025753)|P-loop containing nucleoside triphosphate hydrolase(IPR027417)	no|up	yes|up	yes|up	no|up	2
MsG0280007714.01	AAA+ ATPase domain(IPR003593)|ATPase, AAA-type, core(IPR003959)|ATPase, AAA-type, conserved site(IPR003960)|AAA-type ATPase, N-terminal domain(IPR025753)|P-loop containing nucleoside triphosphate hydrolase(IPR027417)	no|up	no|up	yes|up	yes|up	2
MsG0680030694.01	AAA+ ATPase domain(IPR003593)|ATPase, AAA-type, core(IPR003959)|ATPase, AAA-type, conserved site(IPR003960)|AAA-type ATPase, N-terminal domain(IPR025753)|P-loop containing nucleoside triphosphate hydrolase(IPR027417)	yes|up	yes|up	yes|up	yes|up	4
MsG0580025000.01	AAA+ ATPase domain(IPR003593)|ATPase, AAA-type, core(IPR003959)|ATPase, AAA-type, conserved site(IPR003960)|AAA-type ATPase, N-terminal domain(IPR025753)|P-loop containing nucleoside triphosphate hydrolase(IPR027417)	yes|up	yes|up	yes|up	yes|up	4
MsG0680030695.01	AAA+ ATPase domain(IPR003593)|ATPase, AAA-type, core(IPR003959)|ATPase, AAA-type, conserved site(IPR003960)|AAA-type ATPase, N-terminal domain(IPR025753)|P-loop containing nucleoside triphosphate hydrolase(IPR027417)	yes|up	yes|up	yes|up	no|up	3
MsG0880046397.01	AAA+ ATPase domain(IPR003593)|ATPase, AAA-type, core(IPR003959)|ATPase, AAA-type, conserved site(IPR003960)|P-loop containing nucleoside triphosphate hydrolase(IPR027417)	no|down	no|down	yes|down	no|down	1
MsG0680031843.01	AAA+ ATPase domain(IPR003593)|ATPase, AAA-type, core(IPR003959)|ATPase, AAA-type, conserved site(IPR003960)|P-loop containing nucleoside triphosphate hydrolase(IPR027417)	no|down	yes|up	no|up	no|down	1
MsG0780040372.01	AAA+ ATPase domain(IPR003593)|ATPase, AAA-type, core(IPR003959)|P-loop containing nucleoside triphosphate hydrolase(IPR027417)	no|down	yes|down	no|down	no|down	1
MsG0880046544.01	ABC transporter type 1, transmembrane domain(IPR011527)|ABC transporter type 1, transmembrane domain superfamily(IPR036640)	no|up	no|up	no|up	yes|up	1
MsG0380012002.01	ABC transporter-like(IPR003439)|AAA+ ATPase domain(IPR003593)|ABC transporter type 1, transmembrane domain(IPR011527)|ABC transporter, conserved site(IPR017871)|P-loop containing nucleoside triphosphate hydrolase(IPR027417)|ABC transporter type 1, transmembrane domain superfamily(IPR036640)	no|down	no|up	no|up	yes|up	1
MsG0080047851.01	ABC transporter-like(IPR003439)|AAA+ ATPase domain(IPR003593)|ABC transporter type 1, transmembrane domain(IPR011527)|ABC transporter, conserved site(IPR017871)|P-loop containing nucleoside triphosphate hydrolase(IPR027417)|ABC transporter type 1, transmembrane domain superfamily(IPR036640)	no|down	yes|up	yes|up	no|up	2
MsG0180004752.01	ABC transporter-like(IPR003439)|AAA+ ATPase domain(IPR003593)|ABC transporter type 1, transmembrane domain(IPR011527)|ABC transporter, conserved site(IPR017871)|P-loop containing nucleoside triphosphate hydrolase(IPR027417)|ABC transporter type 1, transmembrane domain superfamily(IPR036640)	no|up	no|down	no|up	yes|up	1
MsG0280007986.01	ABC transporter-like(IPR003439)|AAA+ ATPase domain(IPR003593)|ABC transporter type 1, transmembrane domain(IPR011527)|ABC transporter, conserved site(IPR017871)|P-loop containing nucleoside triphosphate hydrolase(IPR027417)|ABC transporter type 1, transmembrane domain superfamily(IPR036640)	no|up	no|up	yes|up	no|down	1
MsG0180004869.01	ABC transporter-like(IPR003439)|AAA+ ATPase domain(IPR003593)|ABC transporter type 1, transmembrane domain(IPR011527)|ABC transporter, conserved site(IPR017871)|P-loop containing nucleoside triphosphate hydrolase(IPR027417)|ABC transporter type 1, transmembrane domain superfamily(IPR036640)	no|up	no|up	yes|up	yes|up	2
MsG0880042539.01	ABC transporter-like(IPR003439)|AAA+ ATPase domain(IPR003593)|ABC transporter type 1, transmembrane domain(IPR011527)|ABC transporter, conserved site(IPR017871)|P-loop containing nucleoside triphosphate hydrolase(IPR027417)|ABC transporter type 1, transmembrane domain superfamily(IPR036640)	no|up	no|up	no|up	yes|up	1
MsG0180003776.01	ABC transporter-like(IPR003439)|AAA+ ATPase domain(IPR003593)|ABC transporter type 1, transmembrane domain(IPR011527)|ABC transporter, conserved site(IPR017871)|P-loop containing nucleoside triphosphate hydrolase(IPR027417)|ABC transporter type 1, transmembrane domain superfamily(IPR036640)	no|up	no|up	no|up	yes|up	1
MsG0880044884.01	ABC transporter-like(IPR003439)|AAA+ ATPase domain(IPR003593)|ABC transporter type 1, transmembrane domain(IPR011527)|ABC transporter, conserved site(IPR017871)|P-loop containing nucleoside triphosphate hydrolase(IPR027417)|ABC transporter type 1, transmembrane domain superfamily(IPR036640)	no|down	yes|up	yes|up	yes|up	3
MsG0380011824.01	ABC transporter-like(IPR003439)|AAA+ ATPase domain(IPR003593)|ABC transporter type 1, transmembrane domain(IPR011527)|ABC transporter, conserved site(IPR017871)|P-loop containing nucleoside triphosphate hydrolase(IPR027417)|ABC transporter type 1, transmembrane domain superfamily(IPR036640)	no|down	yes|down	no|down	no|up	1
MsG0380012004.01	ABC transporter-like(IPR003439)|AAA+ ATPase domain(IPR003593)|ABC transporter type 1, transmembrane domain(IPR011527)|ABC transporter, conserved site(IPR017871)|P-loop containing nucleoside triphosphate hydrolase(IPR027417)|ABC transporter type 1, transmembrane domain superfamily(IPR036640)	no|up	yes|up	yes|up	yes|up	3
MsG0480022920.01	ABC transporter-like(IPR003439)|AAA+ ATPase domain(IPR003593)|ABC transporter type 1, transmembrane domain(IPR011527)|ABC transporter, conserved site(IPR017871)|P-loop containing nucleoside triphosphate hydrolase(IPR027417)|ABC transporter type 1, transmembrane domain superfamily(IPR036640)	no|down	no|down	no|down	yes|down	1
MsG0180004753.01	ABC transporter-like(IPR003439)|AAA+ ATPase domain(IPR003593)|ABC transporter type 1, transmembrane domain(IPR011527)|ABC transporter, conserved site(IPR017871)|P-loop containing nucleoside triphosphate hydrolase(IPR027417)|ABC transporter type 1, transmembrane domain superfamily(IPR036640)	no|down	no|down	no|down	yes|down	1
MsG0880047263.01	ABC transporter-like(IPR003439)|AAA+ ATPase domain(IPR003593)|ABC transporter type 1, transmembrane domain(IPR011527)|ABC transporter, conserved site(IPR017871)|P-loop containing nucleoside triphosphate hydrolase(IPR027417)|ABC transporter type 1, transmembrane domain superfamily(IPR036640)	no|down	no|up	no|down	yes|down	1
MsG0680033639.01	ABC transporter-like(IPR003439)|AAA+ ATPase domain(IPR003593)|ABC transporter type 1, transmembrane domain(IPR011527)|ABC transporter, conserved site(IPR017871)|P-loop containing nucleoside triphosphate hydrolase(IPR027417)|ABC transporter type 1, transmembrane domain superfamily(IPR036640)	no|up	no|up	no|up	yes|up	1
MsG0780040803.01	ABC transporter-like(IPR003439)|AAA+ ATPase domain(IPR003593)|ABC transporter type 1, transmembrane domain(IPR011527)|ABC transporter, conserved site(IPR017871)|P-loop containing nucleoside triphosphate hydrolase(IPR027417)|ABC transporter type 1, transmembrane domain superfamily(IPR036640)	no|up	no|up	no|up	yes|up	1
MsG0680030746.01	ABC transporter-like(IPR003439)|AAA+ ATPase domain(IPR003593)|ABC transporter type 1, transmembrane domain(IPR011527)|ABC transporter, conserved site(IPR017871)|P-loop containing nucleoside triphosphate hydrolase(IPR027417)|ABC transporter type 1, transmembrane domain superfamily(IPR036640)	no|down	no|up	no|down	yes|down	1
MsG0680033900.01	ABC transporter-like(IPR003439)|AAA+ ATPase domain(IPR003593)|ABC transporter type 1, transmembrane domain(IPR011527)|ABC transporter, conserved site(IPR017871)|P-loop containing nucleoside triphosphate hydrolase(IPR027417)|ABC transporter type 1, transmembrane domain superfamily(IPR036640)	no|down	no|down	yes|down	no|down	1
MsG0680031978.01	ABC transporter-like(IPR003439)|AAA+ ATPase domain(IPR003593)|ABC transporter type 1, transmembrane domain(IPR011527)|ABC transporter, conserved site(IPR017871)|P-loop containing nucleoside triphosphate hydrolase(IPR027417)|ABC transporter type 1, transmembrane domain superfamily(IPR036640)	no|down	no|down	no|down	yes|down	1
MsG0880043598.01	ABC transporter-like(IPR003439)|AAA+ ATPase domain(IPR003593)|ABC transporter type 1, transmembrane domain(IPR011527)|ABC transporter, conserved site(IPR017871)|P-loop containing nucleoside triphosphate hydrolase(IPR027417)|ABC transporter type 1, transmembrane domain superfamily(IPR036640)	no|up	no|up	no|up	yes|up	1
MsG0880047256.01	ABC transporter-like(IPR003439)|AAA+ ATPase domain(IPR003593)|ABC transporter type 1, transmembrane domain(IPR011527)|ABC transporter, conserved site(IPR017871)|P-loop containing nucleoside triphosphate hydrolase(IPR027417)|ABC transporter type 1, transmembrane domain superfamily(IPR036640)	no|up	no|down	no|down	yes|down	1
MsG0380016251.01	ABC transporter-like(IPR003439)|AAA+ ATPase domain(IPR003593)|ABC transporter type 1, transmembrane domain(IPR011527)|Major facilitator superfamily(IPR011701)|ABC transporter, conserved site(IPR017871)|Major facilitator superfamily domain(IPR020846)|P-loop containing nucleoside triphosphate hydrolase(IPR027417)|MFS transporter superfamily(IPR036259)|ABC transporter type 1, transmembrane domain su…	no|down	no|up	yes|down	no|down	1
MsG0880046542.01	ABC transporter-like(IPR003439)|AAA+ ATPase domain(IPR003593)|ABC transporter, conserved site(IPR017871)|P-loop containing nucleoside triphosphate hydrolase(IPR027417)	no|up	no|up	no|up	yes|up	1
MsG0180005151.01	ABC transporter-like(IPR003439)|AAA+ ATPase domain(IPR003593)|ABC transporter, conserved site(IPR017871)|P-loop containing nucleoside triphosphate hydrolase(IPR027417)	no|up	no|up	no|up	yes|up	1
MsG0880046889.01	ABC transporter-like(IPR003439)|AAA+ ATPase domain(IPR003593)|ABC-2 type transporter(IPR013525)|ABC transporter, conserved site(IPR017871)|P-loop containing nucleoside triphosphate hydrolase(IPR027417)	yes|up	yes|up	yes|up	yes|up	4
MsG0180006199.01	ABC transporter-like(IPR003439)|AAA+ ATPase domain(IPR003593)|ABC-2 type transporter(IPR013525)|ABC transporter, conserved site(IPR017871)|P-loop containing nucleoside triphosphate hydrolase(IPR027417)	yes|up	yes|up	yes|up	yes|up	4
MsG0480023470.01	ABC transporter-like(IPR003439)|AAA+ ATPase domain(IPR003593)|ABC-2 type transporter(IPR013525)|ABC transporter, conserved site(IPR017871)|P-loop containing nucleoside triphosphate hydrolase(IPR027417)	no|up	yes|up	yes|up	no|up	2
MsG0780040878.01	ABC transporter-like(IPR003439)|AAA+ ATPase domain(IPR003593)|ABC-2 type transporter(IPR013525)|ABC transporter, conserved site(IPR017871)|P-loop containing nucleoside triphosphate hydrolase(IPR027417)	yes|up	yes|up	yes|up	yes|up	4
MsG0180005118.01	ABC transporter-like(IPR003439)|AAA+ ATPase domain(IPR003593)|ABC-2 type transporter(IPR013525)|ABC transporter, conserved site(IPR017871)|P-loop containing nucleoside triphosphate hydrolase(IPR027417)	no|up	no|up	no|up	yes|up	1
MsG0480022655.01	ABC transporter-like(IPR003439)|AAA+ ATPase domain(IPR003593)|ABC-2 type transporter(IPR013525)|ABC transporter, conserved site(IPR017871)|P-loop containing nucleoside triphosphate hydrolase(IPR027417)	no|up	no|up	yes|up	yes|up	2
MsG0780040784.01	ABC transporter-like(IPR003439)|AAA+ ATPase domain(IPR003593)|ABC-2 type transporter(IPR013525)|Plant PDR ABC transporter associated(IPR013581)|P-loop containing nucleoside triphosphate hydrolase(IPR027417)|ABC-transporter N-terminal domain(IPR029481)|ATP-binding cassette transporter, PDR-like subfamily G, domain 1(IPR034001)	no|down	no|up	yes|down	yes|down	2
MsG0780040806.01	ABC transporter-like(IPR003439)|AAA+ ATPase domain(IPR003593)|ABC-2 type transporter(IPR013525)|Plant PDR ABC transporter associated(IPR013581)|P-loop containing nucleoside triphosphate hydrolase(IPR027417)|ABC-transporter N-terminal domain(IPR029481)|ATP-binding cassette transporter, PDR-like subfamily G, domain 1(IPR034001)|ATP-binding cassette transporter, PDR-like subfamily G, domain 2(IPR034…	yes|up	no|up	no|up	yes|up	2
MsG0780040785.01	ABC transporter-like(IPR003439)|AAA+ ATPase domain(IPR003593)|ABC-2 type transporter(IPR013525)|Plant PDR ABC transporter associated(IPR013581)|P-loop containing nucleoside triphosphate hydrolase(IPR027417)|ABC-transporter N-terminal domain(IPR029481)|ATP-binding cassette transporter, PDR-like subfamily G, domain 1(IPR034001)|ATP-binding cassette transporter, PDR-like subfamily G, domain 2(IPR034…	no|down	no|down	yes|down	yes|down	2
MsG0280011350.01	ABC transporter-like(IPR003439)|AAA+ ATPase domain(IPR003593)|ABC-2 type transporter(IPR013525)|Plant PDR ABC transporter associated(IPR013581)|P-loop containing nucleoside triphosphate hydrolase(IPR027417)|ABC-transporter N-terminal domain(IPR029481)|ATP-binding cassette transporter, PDR-like subfamily G, domain 1(IPR034001)|ATP-binding cassette transporter, PDR-like subfamily G, domain 2(IPR034…	yes|up	yes|up	yes|up	yes|up	4
MsG0280011349.01	ABC transporter-like(IPR003439)|AAA+ ATPase domain(IPR003593)|ABC-2 type transporter(IPR013525)|Plant PDR ABC transporter associated(IPR013581)|P-loop containing nucleoside triphosphate hydrolase(IPR027417)|ABC-transporter N-terminal domain(IPR029481)|ATP-binding cassette transporter, PDR-like subfamily G, domain 1(IPR034001)|ATP-binding cassette transporter, PDR-like subfamily G, domain 2(IPR034…	yes|up	yes|up	yes|up	no|up	3
MsG0680034333.01	ABC transporter-like(IPR003439)|AAA+ ATPase domain(IPR003593)|ABC-2 type transporter(IPR013525)|Plant PDR ABC transporter associated(IPR013581)|P-loop containing nucleoside triphosphate hydrolase(IPR027417)|ABC-transporter N-terminal domain(IPR029481)|ATP-binding cassette transporter, PDR-like subfamily G, domain 1(IPR034001)|ATP-binding cassette transporter, PDR-like subfamily G, domain 2(IPR034…	no|down	no|down	yes|down	no|down	1
MsG0780040808.01	ABC transporter-like(IPR003439)|AAA+ ATPase domain(IPR003593)|ABC-2 type transporter(IPR013525)|Plant PDR ABC transporter associated(IPR013581)|P-loop containing nucleoside triphosphate hydrolase(IPR027417)|ABC-transporter N-terminal domain(IPR029481)|ATP-binding cassette transporter, PDR-like subfamily G, domain 1(IPR034001)|ATP-binding cassette transporter, PDR-like subfamily G, domain 2(IPR034…	no|down	no|up	yes|down	yes|down	2
MsG0780041096.01	ABC transporter-like(IPR003439)|AAA+ ATPase domain(IPR003593)|ABC-2 type transporter(IPR013525)|Plant PDR ABC transporter associated(IPR013581)|P-loop containing nucleoside triphosphate hydrolase(IPR027417)|ABC-transporter N-terminal domain(IPR029481)|ATP-binding cassette transporter, PDR-like subfamily G, domain 2(IPR034003)	no|down	no|down	no|down	yes|down	1
MsG0180005051.01	ABC transporter-like(IPR003439)|AAA+ ATPase domain(IPR003593)|ABC-2 type transporter(IPR013525)|Plant PDR ABC transporter associated(IPR013581)|P-loop containing nucleoside triphosphate hydrolase(IPR027417)|ABC-transporter N-terminal domain(IPR029481)|ATP-binding cassette transporter, PDR-like subfamily G, domain 2(IPR034003)	no|up	no|down	yes|up	no|up	1
MsG0180002442.01	ABC transporter-like(IPR003439)|AAA+ ATPase domain(IPR003593)|ABC-2 type transporter(IPR013525)|Plant PDR ABC transporter associated(IPR013581)|P-loop containing nucleoside triphosphate hydrolase(IPR027417)|ABC-transporter N-terminal domain(IPR029481)|ATP-binding cassette transporter, PDR-like subfamily G, domain 2(IPR034003)	no|up	yes|up	yes|up	yes|up	3
MsG0180005298.01	ABC transporter-like(IPR003439)|AAA+ ATPase domain(IPR003593)|ABC-2 type transporter(IPR013525)|P-loop containing nucleoside triphosphate hydrolase(IPR027417)	no|up	no|up	no|down	yes|up	1
MsG0180000628.01	ABC transporter-like(IPR003439)|AAA+ ATPase domain(IPR003593)|ABC-2 type transporter(IPR013525)|P-loop containing nucleoside triphosphate hydrolase(IPR027417)	no|up	yes|up	no|up	no|up	1
MsG0480018433.01	ABC transporter-like(IPR003439)|AAA+ ATPase domain(IPR003593)|ABC-2 type transporter(IPR013525)|P-loop containing nucleoside triphosphate hydrolase(IPR027417)|ABC-transporter N-terminal domain(IPR029481)	no|down	no|down	yes|down	no|down	1
MsG0280011348.01	ABC transporter-like(IPR003439)|AAA+ ATPase domain(IPR003593)|ABC-2 type transporter(IPR013525)|P-loop containing nucleoside triphosphate hydrolase(IPR027417)|ABC-transporter N-terminal domain(IPR029481)|ATP-binding cassette transporter, PDR-like subfamily G, domain 1(IPR034001)	yes|up	no|up	no|up	no|up	1
MsG0880043762.01	ABC transporter-like(IPR003439)|AAA+ ATPase domain(IPR003593)|Cilia/flagella-associated protein 20/WDR90/C3orf67(IPR007714)|ABC transporter type 1, transmembrane domain(IPR011527)|ABC transporter, conserved site(IPR017871)|P-loop containing nucleoside triphosphate hydrolase(IPR027417)|ABC transporter type 1, transmembrane domain superfamily(IPR036640)	no|up	no|up	yes|up	yes|up	2
MsG0180000631.01	ABC transporter-like(IPR003439)|AAA+ ATPase domain(IPR003593)|Plant PDR ABC transporter associated(IPR013581)|P-loop containing nucleoside triphosphate hydrolase(IPR027417)	no|up	yes|up	no|up	no|up	1
MsG0780040783.01	ABC transporter-like(IPR003439)|AAA+ ATPase domain(IPR003593)|P-loop containing nucleoside triphosphate hydrolase(IPR027417)|ABC-transporter N-terminal domain(IPR029481)|ATP-binding cassette transporter, PDR-like subfamily G, domain 1(IPR034001)	no|up	no|up	yes|down	yes|down	2
MsG0880042789.01	ABC transporter-like(IPR003439)|ABC transporter type 1, transmembrane domain(IPR011527)|ABC transporter, conserved site(IPR017871)|P-loop containing nucleoside triphosphate hydrolase(IPR027417)|ABC transporter type 1, transmembrane domain superfamily(IPR036640)	no|down	no|down	yes|down	yes|down	2
MsG0880046543.01	ABC transporter-like(IPR003439)|P-loop containing nucleoside triphosphate hydrolase(IPR027417)	no|up	no|up	no|up	yes|up	1
MsG0180003809.01	ABC transporter-like(IPR003439)|P-loop containing nucleoside triphosphate hydrolase(IPR027417)	no|up	no|up	yes|up	no|up	1
MsG0380016845.01	ABC-2 type transporter(IPR013525)	no|up	yes|up	no|up	yes|up	2
MsG0780040805.01	ABC-2 type transporter(IPR013525)	yes|up	no|up	yes|up	yes|up	3
MsG0280009894.01	Acetoacetate decarboxylase domain superfamily(IPR023375)	no|up	no|down	yes|up	yes|up	2
MsG0280009919.01	Acetoacetate decarboxylase domain superfamily(IPR023375)	no|up	no|down	no|up	yes|up	1
MsG0680031795.01	Acetylglutamate kinase-like superfamily(IPR036393)	no|up	no|up	no|up	yes|up	1
MsG0180004045.01	Acid phosphatase, class B-like(IPR005519)|Acid phosphatase, plant(IPR010028)|Vegetative storage protein/acid phosphatase(IPR014403)|HAD superfamily(IPR023214)|HAD-like superfamily(IPR036412)	no|up	no|up	yes|down	yes|down	2
MsG0880042317.01	Acid phosphatase, class B-like(IPR005519)|Acid phosphatase, plant(IPR010028)|Vegetative storage protein/acid phosphatase(IPR014403)|HAD superfamily(IPR023214)|HAD-like superfamily(IPR036412)	no|up	yes|up	yes|up	yes|up	3
MsG0280010604.01	Aconitase A/isopropylmalate dehydratase small subunit, swivel domain(IPR000573)|Aconitase/3-isopropylmalate dehydratase large subunit, alpha/beta/alpha domain(IPR001030)|Aconitase/3-isopropylmalate dehydratase, swivel(IPR015928)|Aconitase/3-isopropylmalate dehydratase large subunit, alpha/beta/alpha, subdomain 1/3(IPR015931)|Aconitase family, 4Fe-4S cluster binding site(IPR018136)|Aconitase, iron…	no|up	no|up	no|up	yes|up	1
MsG0480019381.01	Aconitase/3-isopropylmalate dehydratase large subunit, alpha/beta/alpha domain(IPR001030)|Aconitase/3-isopropylmalate dehydratase large subunit, alpha/beta/alpha, subdomain 1/3(IPR015931)|Aconitase, iron-sulfur domain(IPR036008)	yes|up	no|up	yes|up	yes|up	3
MsG0180004023.01	Aconitase/3-isopropylmalate dehydratase large subunit, alpha/beta/alpha domain(IPR001030)|Aconitase/3-isopropylmalate dehydratase large subunit, alpha/beta/alpha, subdomain 1/3(IPR015931)|Aconitase, iron-sulfur domain(IPR036008)	yes|up	no|up	yes|up	yes|up	3
MsG0680033772.01	Aconitase/3-isopropylmalate dehydratase large subunit, alpha/beta/alpha domain(IPR001030)|Aconitase/3-isopropylmalate dehydratase large subunit, alpha/beta/alpha, subdomain 1/3(IPR015931)|PGG domain(IPR026961)|Aconitase, iron-sulfur domain(IPR036008)	no|up	no|up	yes|up	yes|up	2
MsG0580026606.01	ACT domain(IPR002912)	no|down	yes|down	no|down	no|down	1
MsG0780037105.01	ACT domain(IPR002912)	no|down	yes|down	no|down	no|up	1
MsG0480018128.01	ACT domain(IPR002912)|D-isomer specific 2-hydroxyacid dehydrogenase, catalytic domain(IPR006139)|D-isomer specific 2-hydroxyacid dehydrogenase, NAD-binding domain(IPR006140)|D-3-phosphoglycerate dehydrogenase(IPR006236)|S-adenosyl-L-homocysteine hydrolase, NAD binding domain(IPR015878)|Allosteric substrate binding domain superfamily(IPR029009)|D-isomer specific 2-hydroxyacid dehydrogenase, NAD-bi…	no|down	no|up	no|up	yes|up	1
MsG0180002984.01	Actin family(IPR004000)|Actin, conserved site(IPR004001)|Actin/actin-like conserved site(IPR020902)	no|up	no|up	no|down	yes|down	1
MsG0380011701.01	Actin-crosslinking(IPR008999)|Glycoside hydrolase superfamily(IPR017853)	no|up	no|up	yes|up	yes|up	2
MsG0580029881.01	Actinin-type actin-binding domain, conserved site(IPR001589)|Calponin homology domain(IPR001715)|EF-hand domain pair(IPR011992)|CH domain superfamily(IPR036872)	no|up	yes|up	no|up	no|up	1
MsG0180001841.01	Actin-related protein 2/3 complex subunit 2(IPR007188)|Arp2/3 complex subunit 2/4(IPR034666)	no|down	no|down	yes|down	yes|down	2
MsG0380016968.01	Acyl-ACP thioesterase(IPR002864)|HotDog domain superfamily(IPR029069)	no|up	yes|up	yes|up	yes|up	3
MsG0480020827.01	Acyl-CoA dehydrogenase, conserved site(IPR006089)|Acyl-CoA oxidase/dehydrogenase, central domain(IPR006091)|Acyl-CoA dehydrogenase/oxidase C-terminal(IPR009075)|Acyl-CoA dehydrogenase/oxidase, N-terminal and middle domain superfamily(IPR009100)|Acyl-CoA dehydrogenase/oxidase, N-terminal(IPR013786)|Acyl-CoA dehydrogenase-like, C-terminal(IPR036250)|Acyl-CoA dehydrogenase/oxidase, N-terminal domain…	no|down	yes|down	yes|down	no|down	2
MsG0480023340.01	Acyl-CoA oxidase, C-terminal(IPR002655)|Acyl-CoA dehydrogenase-like, C-terminal(IPR036250)	no|down	yes|down	yes|down	yes|down	3
MsG0580027407.01	Acyl-CoA thioester hydrolase YbgC/YbaW family(IPR006684)|HotDog domain superfamily(IPR029069)	no|up	no|up	yes|up	yes|up	2
MsG0180003512.01	Acylphosphatase-like domain(IPR001792)|Acylphosphatase, conserved site(IPR017968)|Acylphosphatase(IPR020456)|Acylphosphatase-like domain superfamily(IPR036046)	no|down	no|down	yes|down	no|down	1
MsG0280007337.01	Adenosine/AMP deaminase domain(IPR001365)|Metal-dependent hydrolase(IPR032466)	no|up	no|up	yes|up	no|up	1
MsG0680032024.01	Adhesive plaque protein(IPR002964)	no|up	no|up	no|up	yes|up	1
MsG0580027777.01	Adhesive plaque protein(IPR002964)	no|up	yes|up	yes|up	yes|up	3
MsG0380017443.01	Agenet-like domain(IPR008395)|Agenet domain, plant type(IPR014002)	no|down	yes|down	no|down	no|down	1
MsG0280007697.01	AIG1-type guanine nucleotide-binding (G) domain(IPR006703)|Translocase of chloroplast 159/132, membrane anchor domain(IPR024283)|P-loop containing nucleoside triphosphate hydrolase(IPR027417)	no|up	yes|up	no|up	no|up	1
MsG0180000252.01	Albumin I chain a(IPR032000)	no|down	no|down	no|down	yes|down	1
MsG0380013212.01	Albumin I chain a(IPR032000)	no|down	no|up	no|down	yes|down	1
MsG0780038054.01	Albumin I chain a(IPR032000)	no|down	yes|down	yes|down	yes|down	3
MsG0780038055.01	Albumin I chain a(IPR032000)	no|down	yes|down	yes|down	yes|down	3
MsG0380015282.01	Albumin I chain a(IPR032000)	no|up	no|down	no|down	yes|down	1
MsG0380015334.01	Albumin I chain a(IPR032000)	no|down	no|down	yes|down	yes|down	2
MsG0380015283.01	Albumin I chain a(IPR032000)	no|up	no|down	yes|down	yes|down	2
MsG0380015287.01	Albumin I chain a(IPR032000)	no|up	no|down	no|down	yes|down	1
MsG0380015285.01	Albumin I chain a(IPR032000)	no|up	yes|down	yes|down	yes|down	3
MsG0380013239.01	Albumin I chain a(IPR032000)	no|down	no|down	yes|down	yes|down	2
MsG0380012938.01	Albumin I(IPR012512)|Albumin I chain a(IPR032000)	no|down	no|up	no|down	yes|down	1
MsG0380016463.01	Alcohol dehydrogenase, zinc-type, conserved site(IPR002328)|GroES-like superfamily(IPR011032)|Alcohol dehydrogenase, C-terminal(IPR013149)|Alcohol dehydrogenase, N-terminal(IPR013154)|NAD(P)-binding domain superfamily(IPR036291)	no|up	no|up	yes|up	yes|up	2
MsG0580029511.01	Alcohol dehydrogenase, zinc-type, conserved site(IPR002328)|GroES-like superfamily(IPR011032)|Alcohol dehydrogenase, C-terminal(IPR013149)|Alcohol dehydrogenase, N-terminal(IPR013154)|NAD(P)-binding domain superfamily(IPR036291)	no|down	yes|down	no|down	no|up	1
MsG0380016458.01	Alcohol dehydrogenase, zinc-type, conserved site(IPR002328)|GroES-like superfamily(IPR011032)|Alcohol dehydrogenase, C-terminal(IPR013149)|Alcohol dehydrogenase, N-terminal(IPR013154)|NAD(P)-binding domain superfamily(IPR036291)	no|up	no|up	yes|up	yes|up	2
MsG0280006638.01	Alcohol dehydrogenase, zinc-type, conserved site(IPR002328)|GroES-like superfamily(IPR011032)|Alcohol dehydrogenase, C-terminal(IPR013149)|Alcohol dehydrogenase, N-terminal(IPR013154)|Polyketide synthase, enoylreductase domain(IPR020843)|D-isomer specific 2-hydroxyacid dehydrogenase, NAD-binding domain conserved site 1(IPR029752)|NAD(P)-binding domain superfamily(IPR036291)	no|up	no|up	no|up	yes|up	1
MsG0580025609.01	Alcohol dehydrogenase, zinc-type, conserved site(IPR002328)|GroES-like superfamily(IPR011032)|Alcohol dehydrogenase, C-terminal(IPR013149)|Alcohol dehydrogenase, N-terminal(IPR013154)|Polyketide synthase, enoylreductase domain(IPR020843)|NAD(P)-binding domain superfamily(IPR036291)	no|down	no|up	no|up	yes|up	1
MsG0680033911.01	Alcohol dehydrogenase, zinc-type, conserved site(IPR002328)|GroES-like superfamily(IPR011032)|Alcohol dehydrogenase, C-terminal(IPR013149)|Alcohol dehydrogenase, N-terminal(IPR013154)|Polyketide synthase, enoylreductase domain(IPR020843)|NAD(P)-binding domain superfamily(IPR036291)	no|down	yes|down	yes|down	no|down	2
MsG0580025606.01	Alcohol dehydrogenase, zinc-type, conserved site(IPR002328)|GroES-like superfamily(IPR011032)|Alcohol dehydrogenase, C-terminal(IPR013149)|Alcohol dehydrogenase, N-terminal(IPR013154)|Polyketide synthase, enoylreductase domain(IPR020843)|NAD(P)-binding domain superfamily(IPR036291)	no|up	yes|up	yes|up	yes|up	3
MsG0280006515.01	Alcohol dehydrogenase, zinc-type, conserved site(IPR002328)|GroES-like superfamily(IPR011032)|Alcohol dehydrogenase, N-terminal(IPR013154)|D-isomer specific 2-hydroxyacid dehydrogenase, NAD-binding domain conserved site 1(IPR029752)|NAD(P)-binding domain superfamily(IPR036291)	no|up	no|up	no|up	yes|up	1
MsG0880046428.01	Aldehyde dehydrogenase domain(IPR015590)|Aldehyde dehydrogenase, cysteine active site(IPR016160)|Aldehyde/histidinol dehydrogenase(IPR016161)|Aldehyde dehydrogenase, N-terminal(IPR016162)|Aldehyde dehydrogenase, C-terminal(IPR016163)	no|down	no|down	yes|down	no|down	1
MsG0380015836.01	Aldehyde dehydrogenase domain(IPR015590)|Aldehyde dehydrogenase, cysteine active site(IPR016160)|Aldehyde/histidinol dehydrogenase(IPR016161)|Aldehyde dehydrogenase, N-terminal(IPR016162)|Aldehyde dehydrogenase, C-terminal(IPR016163)|Aldehyde dehydrogenase, glutamic acid active site(IPR029510)	no|down	no|down	yes|down	yes|down	2
MsG0680035643.01	Aldehyde dehydrogenase domain(IPR015590)|Aldehyde/histidinol dehydrogenase(IPR016161)|Aldehyde dehydrogenase, N-terminal(IPR016162)|Aldehyde dehydrogenase, C-terminal(IPR016163)|Aldehyde dehydrogenase, glutamic acid active site(IPR029510)	yes|up	no|up	yes|up	yes|up	3
MsG0580029491.01	Aldehyde oxidase/xanthine dehydrogenase, a/b hammerhead(IPR000674)|2Fe-2S ferredoxin-type iron-sulfur binding domain(IPR001041)|Molybdopterin dehydrogenase, FAD-binding(IPR002346)|[2Fe-2S]-binding(IPR002888)|CO dehydrogenase flavoprotein, C-terminal(IPR005107)|2Fe-2S ferredoxin, iron-sulphur binding site(IPR006058)|Aldehyde oxidase/xanthine dehydrogenase, molybdopterin binding(IPR008274)|Aldehyde…	no|up	yes|down	no|down	no|down	1
MsG0280011054.01	Aldehyde oxidase/xanthine dehydrogenase, a/b hammerhead(IPR000674)|Aldehyde oxidase/xanthine dehydrogenase, molybdopterin binding(IPR008274)|Aldehyde oxidase/xanthine dehydrogenase, a/b hammerhead superfamily(IPR036856)|Aldehyde oxidase/xanthine dehydrogenase, molybdopterin binding domain superfamily(IPR037165)	no|down	yes|down	yes|down	no|down	2
MsG0480018921.01	Aldehyde/histidinol dehydrogenase(IPR016161)|Aldehyde dehydrogenase, N-terminal(IPR016162)	no|down	yes|up	yes|up	yes|up	3
MsG0180005552.01	Aldo/keto reductase(IPR020471)|NADP-dependent oxidoreductase domain(IPR023210)|NADP-dependent oxidoreductase domain superfamily(IPR036812)	no|down	yes|down	yes|down	yes|down	3
MsG0180001772.01	Aldo/keto reductase(IPR020471)|NADP-dependent oxidoreductase domain(IPR023210)|NADP-dependent oxidoreductase domain superfamily(IPR036812)	no|up	no|up	yes|up	no|up	1
MsG0180005553.01	Aldo/keto reductase(IPR020471)|NADP-dependent oxidoreductase domain(IPR023210)|NADP-dependent oxidoreductase domain superfamily(IPR036812)	no|up	yes|up	no|up	no|up	1
MsG0380016086.01	Aldo/keto reductase, conserved site(IPR018170)|Aldo/keto reductase(IPR020471)|NADP-dependent oxidoreductase domain(IPR023210)|NADP-dependent oxidoreductase domain superfamily(IPR036812)	no|up	no|down	no|up	yes|up	1
MsG0480018969.01	Aldo/keto reductase, conserved site(IPR018170)|Aldo/keto reductase(IPR020471)|NADP-dependent oxidoreductase domain(IPR023210)|NADP-dependent oxidoreductase domain superfamily(IPR036812)	no|up	no|up	no|up	yes|up	1
MsG0480021357.01	Aldo/keto reductase, conserved site(IPR018170)|Aldo/keto reductase(IPR020471)|NADP-dependent oxidoreductase domain(IPR023210)|NADP-dependent oxidoreductase domain superfamily(IPR036812)	no|up	no|up	no|up	yes|up	1
MsG0480018974.01	Aldo/keto reductase, conserved site(IPR018170)|Aldo/keto reductase(IPR020471)|NADP-dependent oxidoreductase domain(IPR023210)|NADP-dependent oxidoreductase domain superfamily(IPR036812)	no|down	no|up	no|up	yes|up	1
MsG0480021360.01	Aldo/keto reductase, conserved site(IPR018170)|Aldo/keto reductase(IPR020471)|NADP-dependent oxidoreductase domain(IPR023210)|NADP-dependent oxidoreductase domain superfamily(IPR036812)	no|down	no|down	no|down	yes|down	1
MsG0480021361.01	Aldo/keto reductase, conserved site(IPR018170)|Aldo/keto reductase(IPR020471)|NADP-dependent oxidoreductase domain(IPR023210)|NADP-dependent oxidoreductase domain superfamily(IPR036812)	no|down	no|down	no|down	yes|down	1
MsG0680034724.01	Aldo/keto reductase, conserved site(IPR018170)|Aldo/keto reductase(IPR020471)|NADP-dependent oxidoreductase domain(IPR023210)|NADP-dependent oxidoreductase domain superfamily(IPR036812)	no|up	yes|up	no|up	no|up	1
MsG0780038863.01	Aldo/keto reductase, conserved site(IPR018170)|NADP-dependent oxidoreductase domain(IPR023210)|NADP-dependent oxidoreductase domain superfamily(IPR036812)	no|up	no|down	no|up	yes|up	1
MsG0780036210.01	Aldose 1-/Glucose-6-phosphate 1-epimerase(IPR008183)|Galactose mutarotase-like domain superfamily(IPR011013)|Glycoside hydrolase-type carbohydrate-binding(IPR014718)	no|up	no|up	no|down	yes|down	1
MsG0480022590.01	Aldose 1-/Glucose-6-phosphate 1-epimerase(IPR008183)|Galactose mutarotase-like domain superfamily(IPR011013)|Glycoside hydrolase-type carbohydrate-binding(IPR014718)	no|down	no|down	no|down	yes|down	1
MsG0680030322.01	Aldose 1-/Glucose-6-phosphate 1-epimerase(IPR008183)|Galactose mutarotase-like domain superfamily(IPR011013)|Glycoside hydrolase-type carbohydrate-binding(IPR014718)|Glucose-6-phosphate 1-epimerase(IPR025532)	no|up	yes|up	no|down	no|down	1
MsG0480021206.01	Allene oxide cyclase(IPR009410)|Allene oxide cyclase superfamily(IPR034871)	no|up	no|up	yes|up	no|up	1
MsG0280006882.01	Allergen Ole e 1, conserved site(IPR006040)	yes|up	no|up	yes|up	no|up	2
MsG0280006548.01	Allergen V5/Tpx-1-related, conserved site(IPR018244)|CAP superfamily(IPR035940)	no|up	yes|up	yes|up	yes|up	3
MsG0080048833.01	ALOG domain(IPR006936)	no|down	yes|down	yes|down	no|down	2
MsG0380014881.01	ALOG domain(IPR006936)	no|up	yes|up	yes|up	yes|up	3
MsG0580028478.01	ALOG domain(IPR006936)	no|down	no|up	no|up	yes|up	1
MsG0480021972.01	ALOG domain(IPR006936)	no|up	no|up	yes|up	yes|up	2
MsG0480023094.01	ALOG domain(IPR006936)	no|up	yes|up	yes|up	no|up	2
MsG0180003483.01	Alpha carbonic anhydrase(IPR001148)|Alpha carbonic anhydrase superfamily(IPR036398)	no|down	no|up	yes|up	no|up	1
MsG0480020767.01	Alpha carbonic anhydrase(IPR001148)|Alpha carbonic anhydrase superfamily(IPR036398)	no|up	yes|up	no|up	no|up	1
MsG0180003484.01	Alpha carbonic anhydrase(IPR001148)|Carbonic anhydrase, alpha-class, conserved site(IPR018338)|Alpha carbonic anhydrase superfamily(IPR036398)	yes|up	yes|up	yes|up	yes|up	4
MsG0780041011.01	Alpha carbonic anhydrase(IPR001148)|Carbonic anhydrase, alpha-class, conserved site(IPR018338)|Alpha carbonic anhydrase superfamily(IPR036398)	no|up	no|up	yes|up	no|up	1
MsG0880044041.01	Alpha crystallin/Hsp20 domain(IPR002068)|HSP20-like chaperone(IPR008978)	no|down	no|down	yes|down	yes|down	2
MsG0580029496.01	Alpha crystallin/Hsp20 domain(IPR002068)|HSP20-like chaperone(IPR008978)	no|down	no|down	yes|down	yes|down	2
MsG0580029494.01	Alpha crystallin/Hsp20 domain(IPR002068)|HSP20-like chaperone(IPR008978)	no|down	no|down	yes|down	yes|down	2
MsG0380011640.01	Alpha crystallin/Hsp20 domain(IPR002068)|HSP20-like chaperone(IPR008978)	no|up	no|down	yes|down	yes|down	2
MsG0480019968.01	Alpha crystallin/Hsp20 domain(IPR002068)|HSP20-like chaperone(IPR008978)	no|up	yes|up	no|up	yes|up	2
MsG0280007225.01	Alpha crystallin/Hsp20 domain(IPR002068)|HSP20-like chaperone(IPR008978)	no|down	yes|down	no|down	no|down	1
MsG0880046423.01	Alpha crystallin/Hsp20 domain(IPR002068)|HSP20-like chaperone(IPR008978)	no|down	no|down	no|down	yes|down	1
MsG0880045947.01	Alpha/Beta hydrolase fold(IPR029058)	no|down	no|down	yes|down	yes|down	2
MsG0380013584.01	Alpha/Beta hydrolase fold(IPR029058)	no|down	no|down	no|down	yes|down	1
MsG0880045677.01	Alpha/Beta hydrolase fold(IPR029058)	no|up	no|up	no|up	yes|up	1
MsG0180000102.01	Alpha/Beta hydrolase fold(IPR029058)	no|up	no|down	no|up	yes|up	1
MsG0580025733.01	Alpha/Beta hydrolase fold(IPR029058)	yes|up	no|up	no|up	no|up	1
MsG0680035615.01	Alpha/Beta hydrolase fold(IPR029058)	no|down	no|down	yes|down	yes|down	2
MsG0580025423.01	Alpha/Beta hydrolase fold(IPR029058)	no|down	no|down	yes|down	yes|down	2
MsG0480023866.01	Alpha/Beta hydrolase fold(IPR029058)	no|down	yes|down	no|down	no|down	1
MsG0880041973.01	Alpha/beta hydrolase fold-1(IPR000073)|Alpha/Beta hydrolase fold(IPR029058)	no|down	no|down	yes|down	yes|down	2
MsG0380017322.01	Alpha/beta hydrolase fold-1(IPR000073)|Alpha/Beta hydrolase fold(IPR029058)	no|up	no|up	no|up	yes|up	1
MsG0880045960.01	Alpha/beta hydrolase fold-1(IPR000073)|Alpha/Beta hydrolase fold(IPR029058)	no|down	no|down	yes|down	yes|down	2
MsG0080048387.01	Alpha/beta hydrolase fold-1(IPR000073)|Alpha/Beta hydrolase fold(IPR029058)	no|up	no|up	no|up	yes|up	1
MsG0880041980.01	Alpha/beta hydrolase fold-1(IPR000073)|Alpha/Beta hydrolase fold(IPR029058)	no|down	no|down	yes|down	yes|down	2
MsG0880045796.01	Alpha/beta hydrolase fold-1(IPR000073)|Alpha/Beta hydrolase fold(IPR029058)	yes|up	no|up	yes|up	yes|up	3
MsG0880044246.01	Alpha/beta hydrolase fold-1(IPR000073)|Alpha/Beta hydrolase fold(IPR029058)	no|down	no|down	no|down	yes|down	1
MsG0180004371.01	Alpha/beta hydrolase fold-1(IPR000073)|Alpha/Beta hydrolase fold(IPR029058)	no|up	yes|up	yes|up	yes|up	3
MsG0780041515.01	Alpha/beta hydrolase fold-1(IPR000073)|Epoxide hydrolase-like(IPR000639)|Alpha/Beta hydrolase fold(IPR029058)	no|down	no|down	no|down	yes|down	1
MsG0480022413.01	Alpha/beta hydrolase fold-1(IPR000073)|Epoxide hydrolase-like(IPR000639)|Alpha/Beta hydrolase fold(IPR029058)	no|down	no|down	no|down	yes|down	1
MsG0780041608.01	Alpha/beta hydrolase fold-1(IPR000073)|Epoxide hydrolase-like(IPR000639)|Alpha/Beta hydrolase fold(IPR029058)	no|down	no|down	yes|down	no|down	1
MsG0780041513.01	Alpha/beta hydrolase fold-1(IPR000073)|Epoxide hydrolase-like(IPR000639)|Alpha/Beta hydrolase fold(IPR029058)	no|up	no|up	yes|up	yes|up	2
MsG0780041613.01	Alpha/beta hydrolase fold-1(IPR000073)|Epoxide hydrolase-like(IPR000639)|Alpha/Beta hydrolase fold(IPR029058)	no|up	no|up	yes|down	no|up	1
MsG0480021484.01	Alpha/beta hydrolase fold-1(IPR000073)|Epoxide hydrolase-like(IPR000639)|Cytochrome P450(IPR001128)|Alpha/Beta hydrolase fold(IPR029058)|Cytochrome P450 superfamily(IPR036396)	yes|up	no|up	no|up	yes|up	2
MsG0380013362.01	Alpha/beta hydrolase fold-1(IPR000073)|Pentatricopeptide repeat(IPR002885)|Tetratricopeptide-like helical domain superfamily(IPR011990)|Alpha/Beta hydrolase fold(IPR029058)	no|up	no|up	no|down	yes|down	1
MsG0680034406.01	Alpha/beta hydrolase fold-1(IPR000073)|Serine aminopeptidase, S33(IPR022742)|Alpha/Beta hydrolase fold(IPR029058)	no|up	no|up	yes|up	no|up	1
MsG0380012044.01	Alpha/beta hydrolase fold-3(IPR013094)|Alpha/Beta hydrolase fold(IPR029058)	no|up	yes|up	no|up	no|down	1
MsG0680033951.01	Alpha/beta hydrolase fold-3(IPR013094)|Alpha/Beta hydrolase fold(IPR029058)	yes|up	yes|up	yes|up	yes|up	4
MsG0780041225.01	Alpha/beta hydrolase fold-3(IPR013094)|Alpha/Beta hydrolase fold(IPR029058)	no|down	yes|down	yes|down	no|down	2
MsG0380013531.01	Alpha/beta hydrolase fold-3(IPR013094)|Alpha/Beta hydrolase fold(IPR029058)	no|up	no|down	no|up	yes|up	1
MsG0680034380.01	Alpha/beta hydrolase fold-3(IPR013094)|Alpha/Beta hydrolase fold(IPR029058)	no|down	yes|down	yes|down	yes|down	3
MsG0180005648.01	Alpha/beta hydrolase fold-3(IPR013094)|Alpha/Beta hydrolase fold(IPR029058)	yes|up	yes|up	yes|up	yes|up	4
MsG0680033953.01	Alpha/beta hydrolase fold-3(IPR013094)|Alpha/Beta hydrolase fold(IPR029058)	yes|up	yes|up	yes|up	yes|up	4
MsG0180005641.01	Alpha/beta hydrolase fold-3(IPR013094)|Alpha/Beta hydrolase fold(IPR029058)	no|up	yes|up	yes|up	yes|up	3
MsG0280007429.01	Alternative oxidase(IPR002680)|Alternative oxidase superfamily(IPR038659)	no|up	no|up	no|up	yes|up	1
MsG0580025338.01	Alternative oxidase(IPR002680)|Alternative oxidase superfamily(IPR038659)	no|up	no|down	no|up	yes|up	1
MsG0580028416.01	Alternative oxidase(IPR002680)|Alternative oxidase superfamily(IPR038659)	yes|up	no|up	no|up	yes|up	2
MsG0880042286.01	Aluminum-activated malate transporter(IPR020966)	yes|up	no|up	no|up	no|up	1
MsG0280010539.01	Aluminum-activated malate transporter(IPR020966)	no|down	yes|up	yes|up	yes|up	3
MsG0480020442.01	Aluminum-activated malate transporter(IPR020966)	no|up	no|up	no|up	yes|up	1
MsG0780040632.01	Aluminum-activated malate transporter(IPR020966)	no|no test	no|up	no|up	yes|up	1
MsG0780041188.01	Aluminum-activated malate transporter(IPR020966)	no|down	no|down	yes|down	yes|down	2
MsG0480022988.01	Amidase signature domain(IPR023631)|Amidase signature (AS) superfamily(IPR036928)	no|up	no|up	no|down	yes|down	1
MsG0480022990.01	Amidase signature domain(IPR023631)|Amidase signature (AS) superfamily(IPR036928)	no|down	no|down	yes|down	yes|down	2
MsG0480023502.01	Amidase, conserved site(IPR020556)|Amidase signature domain(IPR023631)|FAD/NAD(P)-binding domain(IPR023753)|FAD/NAD(P)-binding domain superfamily(IPR036188)|Amidase signature (AS) superfamily(IPR036928)	no|up	yes|up	yes|up	yes|up	3
MsG0280006695.01	Amidohydrolase-related(IPR006680)|Metal-dependent hydrolase, composite domain superfamily(IPR011059)|Allantoinase(IPR017593)|Metal-dependent hydrolase(IPR032466)	no|up	no|up	yes|up	yes|up	2
MsG0380012859.01	Amine oxidase(IPR002937)|FAD/NAD(P)-binding domain superfamily(IPR036188)	no|up	no|up	no|down	yes|up	1
MsG0780037413.01	Amine oxidase(IPR002937)|FAD/NAD(P)-binding domain superfamily(IPR036188)	yes|down	no|down	no|down	no|up	1
MsG0280011089.01	Amine oxidase(IPR002937)|FAD/NAD(P)-binding domain superfamily(IPR036188)|NAD(P)-binding domain superfamily(IPR036291)	no|up	no|down	no|down	yes|down	1
MsG0480018609.01	Amino acid transporter, transmembrane domain(IPR013057)	no|up	no|up	no|down	yes|down	1
MsG0380016869.01	Amino acid transporter, transmembrane domain(IPR013057)	no|up	yes|down	no|down	no|down	1
MsG0680031057.01	Amino acid transporter, transmembrane domain(IPR013057)	no|down	no|up	no|down	yes|down	1
MsG0780037943.01	Amino acid transporter, transmembrane domain(IPR013057)	no|down	no|down	no|down	yes|down	1
MsG0380016384.01	Amino acid transporter, transmembrane domain(IPR013057)	no|up	no|up	yes|up	yes|up	2
MsG0780036718.01	Amino acid transporter, transmembrane domain(IPR013057)	no|up	yes|up	no|up	no|up	1
MsG0580029281.01	Amino acid transporter, transmembrane domain(IPR013057)	no|down	yes|down	no|down	yes|down	2
MsG0380015541.01	Amino acid transporter, transmembrane domain(IPR013057)	no|down	yes|down	no|down	no|down	1
MsG0780036263.01	Amino acid transporter, transmembrane domain(IPR013057)	no|down	yes|down	yes|down	no|down	2
MsG0480021756.01	Amino acid transporter, transmembrane domain(IPR013057)	no|up	yes|up	yes|up	yes|up	3
MsG0380017704.01	Amino acid transporter, transmembrane domain(IPR013057)	no|down	no|up	yes|up	no|up	1
MsG0780040439.01	Amino acid transporter, transmembrane domain(IPR013057)	no|down	yes|down	yes|down	yes|down	3
MsG0580029282.01	Amino acid transporter, transmembrane domain(IPR013057)	no|up	yes|up	yes|up	yes|up	3
MsG0180002404.01	Amino acid transporter, transmembrane domain(IPR013057)	no|down	no|down	no|down	yes|down	1
MsG0480023493.01	Amino acid transporter, transmembrane domain(IPR013057)	no|down	no|down	yes|up	yes|up	2
MsG0880045116.01	Amino acid transporter, transmembrane domain(IPR013057)	no|down	no|down	no|down	yes|down	1
MsG0480021454.01	Amino acid transporter, transmembrane domain(IPR013057)	no|up	no|up	no|down	yes|down	1
MsG0580025156.01	Amino acid transporter, transmembrane domain(IPR013057)	no|down	no|down	no|down	yes|down	1
MsG0380014624.01	Amino acid transporter, transmembrane domain(IPR013057)|Aspartic peptidase domain superfamily(IPR021109)	no|up	no|up	no|up	yes|down	1
MsG0380013447.01	Amino acid/polyamine transporter I(IPR002293)	no|up	no|up	no|down	yes|down	1
MsG0380016862.01	Amino acid/polyamine transporter I(IPR002293)	no|up	yes|up	no|up	no|down	1
MsG0080048301.01	Amino acid/polyamine transporter I(IPR002293)	no|up	no|up	no|down	yes|down	1
MsG0680031638.01	Amino acid/polyamine transporter I(IPR002293)|Amino acid permease/ SLC12A domain(IPR004841)	no|up	yes|up	no|up	no|up	1
MsG0680031637.01	Amino acid/polyamine transporter I(IPR002293)|Amino acid permease/ SLC12A domain(IPR004841)|Cationic amino acid transporter, C-terminal(IPR029485)	no|up	no|up	no|up	yes|up	1
MsG0880046096.01	Amino acid/polyamine transporter I(IPR002293)|Cationic amino acid transporter, C-terminal(IPR029485)	no|down	yes|down	yes|down	yes|down	3
MsG0680031273.01	Amino acid/polyamine transporter I(IPR002293)|Cationic amino acid transporter, C-terminal(IPR029485)	no|up	no|up	yes|up	yes|up	2
MsG0680031269.01	Amino acid/polyamine transporter I(IPR002293)|Cationic amino acid transporter, C-terminal(IPR029485)	no|up	yes|up	yes|up	yes|up	3
MsG0180001103.01	Amino acid/polyamine transporter I(IPR002293)|Cationic amino acid transporter, C-terminal(IPR029485)	no|down	no|down	no|down	yes|down	1
MsG0880047127.01	Aminoacyl-tRNA synthetase, class I, conserved site(IPR001412)|Aminoacyl-tRNA synthetase, class Ic(IPR002305)|Tyrosine-tRNA ligase(IPR002307)|RNA-binding S4 domain(IPR002942)|COBRA, plant(IPR006918)|Rossmann-like alpha/beta/alpha sandwich fold(IPR014729)|RNA-binding S4 domain superfamily(IPR036986)	yes|up	yes|up	yes|up	no|up	3
MsG0880047123.01	Aminoacyl-tRNA synthetase, class Ic(IPR002305)|COBRA, plant(IPR006918)	yes|up	yes|up	yes|up	no|up	3
MsG0880042098.01	Aminoacyl-tRNA synthetase, class II (D/K/N)(IPR004364)|Asparagine-tRNA ligase(IPR004522)	no|up	no|down	yes|down	yes|down	2
MsG0280007169.01	Aminoacyl-tRNA synthetase, class II (D/K/N)(IPR004364)|OB-fold nucleic acid binding domain, AA-tRNA synthetase-type(IPR004365)|Nucleic acid-binding, OB-fold(IPR012340)|F-box associated interaction domain(IPR017451)|Lysyl-tRNA synthetase, class II, C-terminal(IPR018149)|F-box-like domain superfamily(IPR036047)	yes|up	yes|up	no|up	yes|up	3
MsG0880047452.01	Aminoacyl-tRNA synthetase, class II (D/K/N)(IPR004364)|OB-fold nucleic acid binding domain, AA-tRNA synthetase-type(IPR004365)|Nucleic acid-binding, OB-fold(IPR012340)|Lysyl-tRNA synthetase, class II, C-terminal(IPR018149)	no|down	yes|down	no|down	no|down	1
MsG0180005795.01	Aminoglycoside phosphotransferase(IPR002575)|Methylthioribose kinase(IPR009212)|Protein kinase-like domain superfamily(IPR011009)	no|up	yes|up	yes|up	yes|up	3
MsG0180004252.01	Aminoglycoside phosphotransferase(IPR002575)|Methylthioribose kinase(IPR009212)|Protein kinase-like domain superfamily(IPR011009)|ClpP/crotonase-like domain superfamily(IPR029045)|Acetyl-CoA carboxylase(IPR034733)	no|up	yes|up	yes|up	yes|up	3
MsG0180005799.01	Aminoglycoside phosphotransferase(IPR002575)|Protein kinase-like domain superfamily(IPR011009)	no|down	no|down	no|up	yes|up	1
MsG0380013473.01	Aminotransferase class V domain(IPR000192)|Pyridoxal phosphate-dependent transferase, major domain(IPR015421)|Pyridoxal phosphate-dependent transferase(IPR015424)|Aminotransferase class-V, pyridoxal-phosphate binding site(IPR020578)	no|down	no|down	yes|down	no|down	1
MsG0480023364.01	Aminotransferase class-III(IPR005814)|Pyridoxal phosphate-dependent transferase, major domain(IPR015421)|Pyridoxal phosphate-dependent transferase domain 1(IPR015422)|Pyridoxal phosphate-dependent transferase(IPR015424)	no|down	no|down	yes|down	yes|down	2
MsG0480023366.01	Aminotransferase class-III(IPR005814)|Pyridoxal phosphate-dependent transferase, major domain(IPR015421)|Pyridoxal phosphate-dependent transferase domain 1(IPR015422)|Pyridoxal phosphate-dependent transferase(IPR015424)	no|down	no|down	yes|down	yes|down	2
MsG0480021769.01	Aminotransferase class-III(IPR005814)|Pyridoxal phosphate-dependent transferase, major domain(IPR015421)|Pyridoxal phosphate-dependent transferase(IPR015424)	no|up	no|up	yes|up	yes|up	2
MsG0880042834.01	Aminotransferase, class I/classII(IPR004839)|Pyridoxal phosphate-dependent transferase, major domain(IPR015421)|Pyridoxal phosphate-dependent transferase domain 1(IPR015422)|Pyridoxal phosphate-dependent transferase(IPR015424)	no|up	no|up	no|up	yes|up	1
MsG0880044391.01	Aminotransferase, class I/classII(IPR004839)|Tyrosine/nicotianamine aminotransferase(IPR005958)|Pyridoxal phosphate-dependent transferase, major domain(IPR015421)|Pyridoxal phosphate-dependent transferase domain 1(IPR015422)|Pyridoxal phosphate-dependent transferase(IPR015424)	no|down	no|down	no|up	yes|up	1
MsG0780039769.01	Aminotransferases, class-I, pyridoxal-phosphate-binding site(IPR004838)|Aminotransferase, class I/classII(IPR004839)|Pyridoxal phosphate-dependent transferase, major domain(IPR015421)|Pyridoxal phosphate-dependent transferase domain 1(IPR015422)|Pyridoxal phosphate-dependent transferase(IPR015424)	yes|up	yes|up	yes|up	yes|up	4
MsG0880043113.01	Aminotransferases, class-I, pyridoxal-phosphate-binding site(IPR004838)|Aminotransferase, class I/classII(IPR004839)|Pyridoxal phosphate-dependent transferase, major domain(IPR015421)|Pyridoxal phosphate-dependent transferase domain 1(IPR015422)|Pyridoxal phosphate-dependent transferase(IPR015424)	no|up	no|up	no|up	yes|up	1
MsG0480018449.01	Aminotransferases, class-I, pyridoxal-phosphate-binding site(IPR004838)|Aminotransferase, class I/classII(IPR004839)|Pyridoxal phosphate-dependent transferase, major domain(IPR015421)|Pyridoxal phosphate-dependent transferase domain 1(IPR015422)|Pyridoxal phosphate-dependent transferase(IPR015424)	no|up	no|up	no|up	yes|up	1
MsG0480023348.01	Aminotransferases, class-I, pyridoxal-phosphate-binding site(IPR004838)|Aminotransferase, class I/classII(IPR004839)|Pyridoxal phosphate-dependent transferase, major domain(IPR015421)|Pyridoxal phosphate-dependent transferase domain 1(IPR015422)|Pyridoxal phosphate-dependent transferase(IPR015424)	no|up	no|up	yes|up	yes|up	2
MsG0480023513.01	Ammonium transporter(IPR001905)|Ammonium transporter, conserved site(IPR018047)|Ammonium transporter AmtB-like domain(IPR024041)|Ammonium/urea transporter(IPR029020)	no|down	yes|down	yes|down	yes|down	3
MsG0880045557.01	AMP-dependent synthetase/ligase(IPR000873)	no|down	no|down	yes|down	yes|down	2
MsG0880045556.01	AMP-dependent synthetase/ligase(IPR000873)|AMP-binding, conserved site(IPR020845)	yes|down	yes|down	yes|down	yes|down	4
MsG0180001276.01	AMP-dependent synthetase/ligase(IPR000873)|AMP-binding, conserved site(IPR020845)	yes|up	yes|up	yes|up	yes|up	4
MsG0880047492.01	AMP-dependent synthetase/ligase(IPR000873)|AMP-binding, conserved site(IPR020845)	no|up	yes|up	no|up	no|up	1
MsG0780041383.01	AMP-dependent synthetase/ligase(IPR000873)|AMP-binding, conserved site(IPR020845)	no|up	no|up	yes|up	yes|up	2
MsG0480018442.01	AMP-dependent synthetase/ligase(IPR000873)|AMP-binding, conserved site(IPR020845)|AMP-binding enzyme, C-terminal domain(IPR025110)	no|up	yes|up	yes|up	yes|up	3
MsG0280008498.01	AMP-dependent synthetase/ligase(IPR000873)|AMP-binding, conserved site(IPR020845)|AMP-binding enzyme, C-terminal domain(IPR025110)	no|up	no|down	yes|up	yes|up	2
MsG0480018496.01	AMP-dependent synthetase/ligase(IPR000873)|AMP-binding, conserved site(IPR020845)|AMP-binding enzyme, C-terminal domain(IPR025110)	no|down	yes|down	no|down	no|down	1
MsG0680033146.01	AMP-dependent synthetase/ligase(IPR000873)|AMP-binding, conserved site(IPR020845)|AMP-binding enzyme, C-terminal domain(IPR025110)	no|up	no|up	no|up	yes|up	1
MsG0780040124.01	AMP-dependent synthetase/ligase(IPR000873)|AMP-binding, conserved site(IPR020845)|AMP-binding enzyme, C-terminal domain(IPR025110)	yes|up	no|up	no|no test	no|up	1
MsG0180004020.01	AMP-dependent synthetase/ligase(IPR000873)|AMP-binding, conserved site(IPR020845)|AMP-binding enzyme, C-terminal domain(IPR025110)	no|up	no|down	no|up	yes|up	1
MsG0580026301.01	Ankyrin repeat(IPR002110)|Ankyrin repeat-containing domain(IPR020683)|Ankyrin repeat-containing domain superfamily(IPR036770)	no|up	no|up	no|up	yes|up	1
MsG0780037412.01	Ankyrin repeat(IPR002110)|Ankyrin repeat-containing domain(IPR020683)|Ankyrin repeat-containing domain superfamily(IPR036770)	no|down	no|down	no|up	yes|up	1
MsG0780040887.01	Ankyrin repeat(IPR002110)|Ankyrin repeat-containing domain(IPR020683)|PGG domain(IPR026961)|Ankyrin repeat-containing domain superfamily(IPR036770)	no|down	no|down	yes|down	yes|down	2
MsG0580025425.01	Ankyrin repeat(IPR002110)|Ankyrin repeat-containing domain(IPR020683)|PGG domain(IPR026961)|Ankyrin repeat-containing domain superfamily(IPR036770)	no|down	no|down	yes|down	yes|down	2
MsG0780040883.01	Ankyrin repeat(IPR002110)|Ankyrin repeat-containing domain(IPR020683)|PGG domain(IPR026961)|Ankyrin repeat-containing domain superfamily(IPR036770)	no|up	no|up	yes|up	yes|up	2
MsG0780040436.01	Ankyrin repeat(IPR002110)|Ankyrin repeat-containing domain(IPR020683)|Regulatory protein NPR, central domain(IPR024228)|Ankyrin repeat-containing domain superfamily(IPR036770)	no|up	yes|up	yes|up	yes|up	3
MsG0880043688.01	Ankyrin repeat-containing domain(IPR020683)|Ankyrin repeat-containing domain superfamily(IPR036770)	no|down	no|down	yes|down	yes|down	2
MsG0880045491.01	Ankyrin repeat-containing domain(IPR020683)|Ankyrin repeat-containing domain superfamily(IPR036770)	no|up	no|up	yes|up	no|up	1
MsG0580029709.01	Ankyrin repeat-containing domain(IPR020683)|PGG domain(IPR026961)|Alpha/Beta hydrolase fold(IPR029058)|Ankyrin repeat-containing domain superfamily(IPR036770)	no|up	no|up	no|up	yes|up	1
MsG0580029390.01	Ankyrin repeat-containing domain(IPR020683)|PGG domain(IPR026961)|Ankyrin repeat-containing domain superfamily(IPR036770)	no|down	no|down	yes|down	yes|down	2
MsG0880045489.01	Ankyrin repeat-containing domain(IPR020683)|PGG domain(IPR026961)|Ankyrin repeat-containing domain superfamily(IPR036770)	no|up	no|up	yes|up	no|up	1
MsG0280008171.01	Ankyrin repeat-containing domain(IPR020683)|PGG domain(IPR026961)|Ankyrin repeat-containing domain superfamily(IPR036770)	no|down	no|down	no|down	yes|down	1
MsG0280008167.01	Ankyrin repeat-containing domain(IPR020683)|PGG domain(IPR026961)|Ankyrin repeat-containing domain superfamily(IPR036770)	no|up	no|up	yes|up	no|up	1
MsG0280008165.01	Ankyrin repeat-containing domain(IPR020683)|PGG domain(IPR026961)|Ankyrin repeat-containing domain superfamily(IPR036770)	no|down	no|down	yes|down	yes|down	2
MsG0680033960.01	Ankyrin repeat-containing domain(IPR020683)|PGG domain(IPR026961)|Ankyrin repeat-containing domain superfamily(IPR036770)	no|up	yes|up	no|up	no|up	1
MsG0880043547.01	Annexin repeat(IPR018502)	no|down	yes|down	yes|down	yes|down	3
MsG0880043548.01	Annexin repeat(IPR018502)|Annexin superfamily(IPR037104)	no|down	yes|down	yes|down	yes|down	3
MsG0680031671.01	Annexin(IPR001464)|Annexin repeat(IPR018502)|Annexin superfamily(IPR037104)	no|up	yes|up	no|up	no|up	1
MsG0180001235.01	Anthranilate synthase/para-aminobenzoate synthase like domain(IPR006221)|Glutamine amidotransferase(IPR017926)|Class I glutamine amidotransferase-like(IPR029062)	no|down	no|up	yes|up	no|down	1
MsG0680031687.01	AP2/ERF domain(IPR001471)|DNA-binding domain superfamily(IPR016177)|AP2/ERF domain superfamily(IPR036955)	no|down	no|down	yes|down	yes|down	2
MsG0280007941.01	AP2/ERF domain(IPR001471)|DNA-binding domain superfamily(IPR016177)|AP2/ERF domain superfamily(IPR036955)	no|up	no|down	yes|up	yes|up	2
MsG0880045896.01	AP2/ERF domain(IPR001471)|DNA-binding domain superfamily(IPR016177)|AP2/ERF domain superfamily(IPR036955)	no|down	no|down	no|up	yes|up	1
MsG0580029256.01	AP2/ERF domain(IPR001471)|DNA-binding domain superfamily(IPR016177)|AP2/ERF domain superfamily(IPR036955)	no|down	yes|down	yes|down	no|down	2
MsG0880046201.01	AP2/ERF domain(IPR001471)|DNA-binding domain superfamily(IPR016177)|AP2/ERF domain superfamily(IPR036955)	yes|up	yes|up	yes|up	no|up	3
MsG0180003836.01	AP2/ERF domain(IPR001471)|DNA-binding domain superfamily(IPR016177)|AP2/ERF domain superfamily(IPR036955)	no|up	yes|up	yes|up	yes|up	3
MsG0780040179.01	AP2/ERF domain(IPR001471)|DNA-binding domain superfamily(IPR016177)|AP2/ERF domain superfamily(IPR036955)	no|down	no|down	yes|down	yes|down	2
MsG0680033832.01	AP2/ERF domain(IPR001471)|DNA-binding domain superfamily(IPR016177)|AP2/ERF domain superfamily(IPR036955)	no|down	yes|down	yes|down	yes|down	3
MsG0180003834.01	AP2/ERF domain(IPR001471)|DNA-binding domain superfamily(IPR016177)|AP2/ERF domain superfamily(IPR036955)	no|up	yes|up	yes|up	yes|up	3
MsG0180002136.01	AP2/ERF domain(IPR001471)|DNA-binding domain superfamily(IPR016177)|AP2/ERF domain superfamily(IPR036955)	no|up	yes|up	no|up	no|up	1
MsG0480018230.01	AP2/ERF domain(IPR001471)|DNA-binding domain superfamily(IPR016177)|AP2/ERF domain superfamily(IPR036955)	no|up	no|up	yes|up	yes|up	2
MsG0580024294.01	AP2/ERF domain(IPR001471)|DNA-binding domain superfamily(IPR016177)|AP2/ERF domain superfamily(IPR036955)	yes|up	yes|up	yes|up	no|up	3
MsG0780039948.01	AP2/ERF domain(IPR001471)|DNA-binding domain superfamily(IPR016177)|AP2/ERF domain superfamily(IPR036955)	no|up	no|up	no|down	yes|down	1
MsG0280008439.01	AP2/ERF domain(IPR001471)|DNA-binding domain superfamily(IPR016177)|AP2/ERF domain superfamily(IPR036955)	no|up	yes|up	no|up	no|down	1
MsG0780040733.01	AP2/ERF domain(IPR001471)|DNA-binding domain superfamily(IPR016177)|AP2/ERF domain superfamily(IPR036955)	no|up	no|down	yes|up	yes|up	2
MsG0580024424.01	AP2/ERF domain(IPR001471)|DNA-binding domain superfamily(IPR016177)|AP2/ERF domain superfamily(IPR036955)	no|up	yes|up	no|up	no|down	1
MsG0380015561.01	AP2/ERF domain(IPR001471)|DNA-binding domain superfamily(IPR016177)|AP2/ERF domain superfamily(IPR036955)	yes|up	yes|up	yes|up	no|up	3
MsG0180004079.01	AP2/ERF domain(IPR001471)|DNA-binding domain superfamily(IPR016177)|AP2/ERF domain superfamily(IPR036955)	no|up	no|down	yes|up	yes|up	2
MsG0180004830.01	AP2/ERF domain(IPR001471)|DNA-binding domain superfamily(IPR016177)|AP2/ERF domain superfamily(IPR036955)	yes|up	yes|up	yes|up	yes|up	4
MsG0180002138.01	AP2/ERF domain(IPR001471)|DNA-binding domain superfamily(IPR016177)|AP2/ERF domain superfamily(IPR036955)	no|down	yes|down	no|down	no|up	1
MsG0180005499.01	AP2/ERF domain(IPR001471)|DNA-binding domain superfamily(IPR016177)|AP2/ERF domain superfamily(IPR036955)	yes|up	yes|up	yes|up	no|up	3
MsG0180001804.01	AP2/ERF domain(IPR001471)|DNA-binding domain superfamily(IPR016177)|AP2/ERF domain superfamily(IPR036955)	no|up	no|up	yes|up	yes|up	2
MsG0680032167.01	AP2/ERF domain(IPR001471)|DNA-binding domain superfamily(IPR016177)|AP2/ERF domain superfamily(IPR036955)	no|up	no|down	no|up	yes|up	1
MsG0480021121.01	AP2/ERF domain(IPR001471)|DNA-binding domain superfamily(IPR016177)|AP2/ERF domain superfamily(IPR036955)	no|down	yes|down	no|down	yes|down	2
MsG0480021906.01	AP2/ERF domain(IPR001471)|DNA-binding domain superfamily(IPR016177)|AP2/ERF domain superfamily(IPR036955)	yes|up	yes|up	yes|up	no|up	3
MsG0780040729.01	AP2/ERF domain(IPR001471)|DNA-binding domain superfamily(IPR016177)|AP2/ERF domain superfamily(IPR036955)	no|down	no|up	yes|up	yes|up	2
MsG0680033821.01	AP2/ERF domain(IPR001471)|DNA-binding domain superfamily(IPR016177)|AP2/ERF domain superfamily(IPR036955)	no|down	yes|down	yes|down	no|down	2
MsG0880041884.01	AP2/ERF domain(IPR001471)|DNA-binding domain superfamily(IPR016177)|AP2/ERF domain superfamily(IPR036955)	no|down	yes|down	yes|down	yes|down	3
MsG0280010160.01	AP2/ERF domain(IPR001471)|DNA-binding domain superfamily(IPR016177)|AP2/ERF domain superfamily(IPR036955)	no|up	yes|up	yes|up	no|up	2
MsG0180002585.01	AP2/ERF domain(IPR001471)|DNA-binding domain superfamily(IPR016177)|AP2/ERF domain superfamily(IPR036955)	no|down	yes|down	no|down	no|up	1
MsG0580024357.01	AP2/ERF domain(IPR001471)|DNA-binding domain superfamily(IPR016177)|AP2/ERF domain superfamily(IPR036955)	no|up	yes|up	no|up	no|up	1
MsG0180005503.01	AP2/ERF domain(IPR001471)|DNA-binding domain superfamily(IPR016177)|AP2/ERF domain superfamily(IPR036955)	yes|up	yes|up	yes|up	no|up	3
MsG0780039288.01	AP2/ERF domain(IPR001471)|DNA-binding domain superfamily(IPR016177)|AP2/ERF domain superfamily(IPR036955)	no|down	no|down	no|up	yes|up	1
MsG0680033830.01	AP2/ERF domain(IPR001471)|DNA-binding domain superfamily(IPR016177)|AP2/ERF domain superfamily(IPR036955)	yes|down	yes|down	yes|down	yes|down	4
MsG0680033837.01	AP2/ERF domain(IPR001471)|DNA-binding domain superfamily(IPR016177)|AP2/ERF domain superfamily(IPR036955)	no|down	yes|down	yes|down	no|down	2
MsG0180000284.01	AP2/ERF domain(IPR001471)|DNA-binding domain superfamily(IPR016177)|AP2/ERF transcription factor ERF/PTI6(IPR017392)|AP2/ERF domain superfamily(IPR036955)	no|down	yes|down	no|down	no|down	1
MsG0780040727.01	AP2/ERF domain(IPR001471)|DNA-binding domain superfamily(IPR016177)|AP2/ERF transcription factor ERF/PTI6(IPR017392)|AP2/ERF domain superfamily(IPR036955)	no|up	no|up	yes|up	yes|up	2
MsG0380017157.01	AP2/ERF domain(IPR001471)|DNA-binding domain superfamily(IPR016177)|AP2/ERF transcription factor ERF/PTI6(IPR017392)|AP2/ERF domain superfamily(IPR036955)	no|up	no|down	no|up	yes|up	1
MsG0080048299.01	AP2/ERF domain(IPR001471)|DNA-binding domain superfamily(IPR016177)|AP2/ERF transcription factor ERF/PTI6(IPR017392)|AP2/ERF domain superfamily(IPR036955)	yes|up	no|up	no|up	no|down	1
MsG0680033820.01	AP2/ERF domain(IPR001471)|DNA-binding domain superfamily(IPR016177)|AP2/ERF transcription factor ERF/PTI6(IPR017392)|AP2/ERF domain superfamily(IPR036955)	yes|down	yes|down	yes|down	yes|down	4
MsG0780036819.01	AP2/ERF domain(IPR001471)|DNA-binding domain superfamily(IPR016177)|AP2/ERF transcription factor ERF/PTI6(IPR017392)|AP2/ERF domain superfamily(IPR036955)	no|up	no|up	no|up	yes|up	1
MsG0280008442.01	AP2/ERF domain(IPR001471)|DNA-binding domain superfamily(IPR016177)|AP2/ERF transcription factor ERF/PTI6(IPR017392)|AP2/ERF domain superfamily(IPR036955)	no|up	yes|up	no|up	no|down	1
MsG0580027624.01	AP2/ERF domain(IPR001471)|DNA-binding domain superfamily(IPR016177)|AP2/ERF transcription factor ERF/PTI6(IPR017392)|AP2/ERF domain superfamily(IPR036955)	no|up	yes|up	no|up	no|up	1
MsG0880042852.01	AP2/ERF domain(IPR001471)|DNA-binding domain superfamily(IPR016177)|AP2/ERF transcription factor ERF/PTI6(IPR017392)|AP2/ERF domain superfamily(IPR036955)	no|up	yes|up	no|up	no|up	1
MsG0780040730.01	AP2/ERF domain(IPR001471)|DNA-binding domain superfamily(IPR016177)|Viral movement protein(IPR028919)|AP2/ERF domain superfamily(IPR036955)	no|up	no|up	yes|up	yes|up	2
MsG0180001004.01	Arabinogalactan peptide, AGP(IPR009424)	no|up	no|up	yes|down	yes|down	2
MsG0680035646.01	Arabinogalactan peptide, AGP(IPR009424)	yes|up	yes|up	yes|up	no|up	3
MsG0180001022.01	Arabinogalactan peptide, AGP(IPR009424)	no|down	yes|down	no|down	yes|down	2
MsG0380016490.01	Arabinogalactan peptide, AGP(IPR009424)	no|up	no|up	no|down	yes|down	1
MsG0380017000.01	Arf GTPase activating protein(IPR001164)|Pleckstrin homology domain(IPR001849)|Ankyrin repeat(IPR002110)|BAR domain(IPR004148)|Ankyrin repeat-containing domain(IPR020683)|AH/BAR domain superfamily(IPR027267)|Plant AGD1/2/3/4, BAR domain(IPR035670)|Ankyrin repeat-containing domain superfamily(IPR036770)|ARFGAP/RecO-like zinc finger(IPR037278)|ArfGAP domain superfamily(IPR038508)	no|up	yes|down	no|down	no|up	1
MsG0180003684.01	Arginine biosynthesis protein ArgJ(IPR002813)|ArgJ-like domain superfamily(IPR016117)	no|up	yes|up	no|up	no|up	1
MsG0580026244.01	Argonaute, linker 1 domain(IPR014811)|Argonaute linker 2 domain(IPR032472)|Protein argonaute, N-terminal(IPR032474)|PAZ domain superfamily(IPR036085)	no|up	no|down	no|up	yes|up	1
MsG0580028986.01	Armadillo(IPR000225)|Armadillo-like helical(IPR011989)|Armadillo-type fold(IPR016024)	no|down	yes|down	yes|down	yes|down	3
MsG0580025103.01	Armadillo(IPR000225)|Armadillo-like helical(IPR011989)|Armadillo-type fold(IPR016024)	no|up	yes|up	no|up	no|down	1
MsG0380015302.01	Armadillo(IPR000225)|Armadillo-like helical(IPR011989)|Armadillo-type fold(IPR016024)	no|down	yes|down	no|down	no|up	1
MsG0280006936.01	Armadillo(IPR000225)|Armadillo-like helical(IPR011989)|Zinc finger, RING/FYVE/PHD-type(IPR013083)|Armadillo-type fold(IPR016024)	yes|up	yes|up	no|up	no|down	2
MsG0580025785.01	Armadillo(IPR000225)|U box domain(IPR003613)|Armadillo-like helical(IPR011989)|Zinc finger, RING/FYVE/PHD-type(IPR013083)|Armadillo-type fold(IPR016024)	no|up	yes|up	no|up	no|down	1
MsG0780041777.01	Armadillo(IPR000225)|U box domain(IPR003613)|Armadillo-like helical(IPR011989)|Zinc finger, RING/FYVE/PHD-type(IPR013083)|Armadillo-type fold(IPR016024)	yes|up	yes|up	yes|up	no|up	3
MsG0780041704.01	Armadillo(IPR000225)|U box domain(IPR003613)|Armadillo-like helical(IPR011989)|Zinc finger, RING/FYVE/PHD-type(IPR013083)|Armadillo-type fold(IPR016024)	no|up	yes|up	no|up	no|up	1
MsG0880046344.01	Armadillo(IPR000225)|U box domain(IPR003613)|DSS1/SEM1(IPR007834)|Armadillo-like helical(IPR011989)|Zinc finger, RING/FYVE/PHD-type(IPR013083)|Armadillo-type fold(IPR016024)	yes|up	yes|up	yes|up	no|up	3
MsG0580027733.01	Armadillo(IPR000225)|U box domain(IPR003613)|Zinc finger, RING/FYVE/PHD-type(IPR013083)|Armadillo-type fold(IPR016024)	no|up	no|up	no|up	yes|up	1
MsG0180001944.01	Armadillo-like helical(IPR011989)|Armadillo-type fold(IPR016024)	yes|up	yes|up	no|up	no|up	2
MsG0180000557.01	Armadillo-like helical(IPR011989)|Armadillo-type fold(IPR016024)	no|down	no|down	yes|down	yes|down	2
MsG0180003252.01	Armadillo-like helical(IPR011989)|Armadillo-type fold(IPR016024)	no|up	yes|up	no|up	no|up	1
MsG0880046300.01	Armadillo-like helical(IPR011989)|Armadillo-type fold(IPR016024)	no|up	yes|up	no|up	no|up	1
MsG0880046837.01	Armadillo-like helical(IPR011989)|Armadillo-type fold(IPR016024)	no|up	yes|up	no|up	no|up	1
MsG0580024742.01	Armadillo-like helical(IPR011989)|Armadillo-type fold(IPR016024)|Condensin-2 complex subunit G2(IPR024741)	no|down	no|down	no|down	yes|down	1
MsG0480019776.01	Armadillo-type fold(IPR016024)	no|down	no|up	yes|up	yes|up	2
MsG0480018123.01	Armadillo-type fold(IPR016024)	no|up	no|up	no|up	yes|up	1
MsG0280007311.01	Aromatic amino acid beta-eliminating lyase/threonine aldolase(IPR001597)|Pyridoxal phosphate-dependent transferase domain 1(IPR015422)|Pyridoxal phosphate-dependent transferase(IPR015424)	no|up	no|up	yes|up	yes|up	2
MsG0780041674.01	Aromatic amino acid beta-eliminating lyase/threonine aldolase(IPR001597)|Pyridoxal phosphate-dependent transferase, major domain(IPR015421)|Pyridoxal phosphate-dependent transferase domain 1(IPR015422)|Pyridoxal phosphate-dependent transferase(IPR015424)|Threonine aldolase(IPR023603)	no|up	no|up	no|up	yes|up	1
MsG0780040944.01	Aromatic amino acid lyase(IPR001106)|Phenylalanine ammonia-lyase(IPR005922)|L-Aspartase-like(IPR008948)|Phenylalanine/histidine ammonia-lyases, active site(IPR022313)|Fumarase/histidase, N-terminal(IPR024083)	yes|up	no|up	yes|up	no|up	2
MsG0580028450.01	Asparagine synthase(IPR001962)|Asparagine synthase, glutamine-hydrolyzing(IPR006426)|Rossmann-like alpha/beta/alpha sandwich fold(IPR014729)|Glutamine amidotransferase type 2 domain(IPR017932)|Nucleophile aminohydrolases, N-terminal(IPR029055)	no|down	yes|up	no|up	no|up	1
MsG0080047999.01	Asparagine synthase(IPR001962)|Asparagine synthase, glutamine-hydrolyzing(IPR006426)|Rossmann-like alpha/beta/alpha sandwich fold(IPR014729)|Glutamine amidotransferase type 2 domain(IPR017932)|Nucleophile aminohydrolases, N-terminal(IPR029055)	no|down	yes|down	yes|down	yes|down	3
MsG0380014802.01	Asparagine synthase(IPR001962)|Asparagine synthase, glutamine-hydrolyzing(IPR006426)|Rossmann-like alpha/beta/alpha sandwich fold(IPR014729)|Glutamine amidotransferase type 2 domain(IPR017932)|Nucleophile aminohydrolases, N-terminal(IPR029055)|Asparagine synthase, N-terminal domain(IPR033738)	no|up	no|down	yes|down	yes|down	2
MsG0480022222.01	Asparagine synthase(IPR001962)|Rossmann-like alpha/beta/alpha sandwich fold(IPR014729)|Glutamine amidotransferase type 2 domain(IPR017932)|Nucleophile aminohydrolases, N-terminal(IPR029055)	no|up	no|up	no|up	yes|up	1
MsG0380017489.01	Aspartate/glutamate/uridylate kinase(IPR001048)|Glutamate/acetylglutamate kinase(IPR001057)|Acetylglutamate kinase family(IPR004662)|Acetylglutamate kinase-like superfamily(IPR036393)	yes|up	yes|up	yes|up	yes|up	4
MsG0680034243.01	Aspartic peptidase domain superfamily(IPR021109)	no|down	no|down	yes|down	yes|down	2
MsG0380013223.01	Aspartic peptidase domain superfamily(IPR021109)	no|down	no|up	yes|down	yes|down	2
MsG0280009311.01	Aspartic peptidase domain superfamily(IPR021109)	yes|up	yes|up	yes|up	no|up	3
MsG0780038041.01	Aspartic peptidase domain superfamily(IPR021109)	no|down	no|down	yes|down	no|down	1
MsG0080048511.01	Aspartic peptidase domain superfamily(IPR021109)	no|down	yes|down	yes|down	yes|down	3
MsG0680031422.01	Aspartic peptidase domain superfamily(IPR021109)	no|down	no|down	yes|down	no|down	1
MsG0180003841.01	Aspartic peptidase domain superfamily(IPR021109)	no|down	yes|up	yes|up	yes|up	3
MsG0080049100.01	Aspartic peptidase domain superfamily(IPR021109)|Xylanase inhibitor, C-terminal(IPR032799)	no|down	yes|down	yes|down	yes|down	3
MsG0280007200.01	Aspartic peptidase domain superfamily(IPR021109)|Xylanase inhibitor, C-terminal(IPR032799)	no|down	yes|down	yes|down	no|down	2
MsG0780038318.01	Aspartic peptidase domain superfamily(IPR021109)|Xylanase inhibitor, C-terminal(IPR032799)|Xylanase inhibitor, N-terminal(IPR032861)	no|up	no|down	yes|down	no|down	1
MsG0280007201.01	Aspartic peptidase domain superfamily(IPR021109)|Xylanase inhibitor, C-terminal(IPR032799)|Xylanase inhibitor, N-terminal(IPR032861)	no|up	no|down	yes|up	yes|up	2
MsG0380013203.01	Aspartic peptidase, DDI1-type(IPR019103)|Aspartic peptidase domain superfamily(IPR021109)	yes|down	yes|down	yes|down	yes|down	4
MsG0180000157.01	AT hook, DNA-binding motif(IPR017956)	no|up	yes|up	no|up	no|up	1
MsG0380012366.01	Ataxin-2, C-terminal(IPR009818)	no|down	yes|down	no|down	no|down	1
MsG0380015348.01	ATPase, AAA-type, core(IPR003959)|P-loop containing nucleoside triphosphate hydrolase(IPR027417)	no|down	yes|up	no|up	no|down	1
MsG0580030169.01	ATPase, AAA-type, core(IPR003959)|P-loop containing nucleoside triphosphate hydrolase(IPR027417)	no|up	yes|up	yes|up	no|up	2
MsG0280011119.01	ATPase, AAA-type, core(IPR003959)|P-loop containing nucleoside triphosphate hydrolase(IPR027417)	yes|up	no|up	no|up	no|up	1
MsG0380016571.01	ATPase, AAA-type, core(IPR003959)|P-loop containing nucleoside triphosphate hydrolase(IPR027417)	no|up	yes|up	no|up	no|up	1
MsG0580029643.01	ATPase, BadF/BadG/BcrA/BcrD type(IPR002731)	no|down	yes|down	yes|down	yes|down	3
MsG0880046692.01	ATPase, F1/V1/A1 complex, alpha/beta subunit, N-terminal domain(IPR004100)|ATP synthase subunit alpha, N-terminal domain-like superfamily(IPR023366)|ATPase, F1/V1/A1 complex, alpha/beta subunit, N-terminal domain superfamily(IPR036121)	yes|up	no|up	no|up	no|up	1
MsG0780037284.01	ATPase, F1/V1/A1 complex, alpha/beta subunit, nucleotide-binding domain(IPR000194)|ATPase, alpha/beta subunit, nucleotide-binding domain, active site(IPR020003)|ATPase, F1/V1 complex, beta/alpha subunit, C-terminal(IPR024034)|P-loop containing nucleoside triphosphate hydrolase(IPR027417)	no|down	yes|down	no|down	no|down	1
MsG0780041778.01	ATPase, OSCP/delta subunit(IPR000711)|F1F0 ATP synthase OSCP/delta subunit, N-terminal domain superfamily(IPR026015)	no|down	yes|down	no|down	no|down	1
MsG0680030381.01	ATP-dependent RNA helicase DEAD-box, conserved site(IPR000629)|Helicase, C-terminal(IPR001650)|DEAD/DEAH box helicase domain(IPR011545)|Helicase superfamily 1/2, ATP-binding domain(IPR014001)|P-loop containing nucleoside triphosphate hydrolase(IPR027417)	no|down	yes|down	no|down	no|down	1
MsG0280009544.01	ATP-dependent RNA helicase DEAD-box, conserved site(IPR000629)|Helicase, C-terminal(IPR001650)|DEAD/DEAH box helicase domain(IPR011545)|Helicase superfamily 1/2, ATP-binding domain(IPR014001)|P-loop containing nucleoside triphosphate hydrolase(IPR027417)	no|up	no|up	no|up	yes|up	1
MsG0880047695.01	Atypical dual-specificity phosphatase Siw14-like(IPR004861)|Atypical dual-specificity phosphatase Siw14-like, plant and fungi(IPR020428)|Protein-tyrosine phosphatase-like(IPR029021)	no|up	no|up	yes|up	yes|up	2
MsG0780039822.01	Atypical dual-specificity phosphatase Siw14-like(IPR004861)|Protein-tyrosine phosphatase, active site(IPR016130)|Atypical dual-specificity phosphatase Siw14-like, plant and fungi(IPR020428)|Protein-tyrosine phosphatase-like(IPR029021)	yes|up	no|up	yes|up	no|up	2
MsG0280010596.01	Autophagy protein Atg8 ubiquitin-like(IPR004241)|Ubiquitin-like domain superfamily(IPR029071)	no|down	yes|down	yes|down	yes|down	3
MsG0380016793.01	Autophagy-related protein 13(IPR018731)|HORMA domain superfamily(IPR036570)	no|down	yes|down	no|down	no|down	1
MsG0180001660.01	AUX/IAA domain(IPR033389)	no|up	no|up	yes|up	no|up	1
MsG0780040697.01	AUX/IAA domain(IPR033389)	no|up	yes|up	no|up	no|down	1
MsG0680035708.01	AUX/IAA domain(IPR033389)	no|down	yes|down	yes|down	no|down	2
MsG0280011258.01	AUX/IAA domain(IPR033389)	no|down	no|down	no|down	yes|down	1
MsG0180004158.01	AUX/IAA domain(IPR033389)	no|down	no|up	no|down	yes|down	1
MsG0480018452.01	AUX/IAA domain(IPR033389)	no|down	no|down	yes|down	yes|down	2
MsG0480021676.01	AUX/IAA domain(IPR033389)	no|up	no|down	no|down	yes|down	1
MsG0180004272.01	AUX/IAA domain(IPR033389)	no|up	no|down	no|up	yes|up	1
MsG0180003906.01	AUX/IAA domain(IPR033389)	no|down	no|up	no|down	yes|down	1
MsG0880046940.01	AWPM-19-like(IPR008390)	no|up	no|down	yes|down	yes|down	2
MsG0280008740.01	AWPM-19-like(IPR008390)	no|down	no|down	yes|down	yes|down	2
MsG0580027135.01	AWPM-19-like(IPR008390)	no|down	no|down	yes|down	no|down	1
MsG0780038810.01	B3 DNA binding domain(IPR003340)|Auxin response factor(IPR010525)|DNA-binding pseudobarrel domain superfamily(IPR015300)|AUX/IAA domain(IPR033389)	no|down	no|down	no|down	yes|down	1
MsG0880042986.01	B3 DNA binding domain(IPR003340)|Auxin response factor(IPR010525)|DNA-binding pseudobarrel domain superfamily(IPR015300)|AUX/IAA domain(IPR033389)	no|down	no|down	no|down	yes|down	1
MsG0080048396.01	B3 DNA binding domain(IPR003340)|DNA-binding pseudobarrel domain superfamily(IPR015300)	no|up	no|up	no|up	yes|up	1
MsG0180001328.01	B3 DNA binding domain(IPR003340)|DNA-binding pseudobarrel domain superfamily(IPR015300)	no|up	yes|up	no|up	no|up	1
MsG0380015712.01	B3 DNA binding domain(IPR003340)|DNA-binding pseudobarrel domain superfamily(IPR015300)	yes|down	no|down	no|down	no|up	1
MsG0180001318.01	B3 DNA binding domain(IPR003340)|DNA-binding pseudobarrel domain superfamily(IPR015300)	no|down	yes|down	no|down	no|down	1
MsG0780038129.01	B3 DNA binding domain(IPR003340)|GRAM domain(IPR004182)|DNA-binding pseudobarrel domain superfamily(IPR015300)	no|up	no|up	yes|up	yes|up	2
MsG0180000462.01	B3 DNA binding domain(IPR003340)|Pex, N-terminal(IPR006845)|DNA-binding pseudobarrel domain superfamily(IPR015300)	no|down	yes|down	no|down	no|down	1
MsG0380016531.01	Bacterial/plant glycogen synthase(IPR011835)|Starch synthase, catalytic domain(IPR013534)	no|up	yes|up	yes|up	yes|up	3
MsG0880046420.01	Band 7 domain(IPR001107)|Band 7/SPFH domain superfamily(IPR036013)	no|down	yes|down	no|down	yes|down	2
MsG0880046414.01	Band 7 domain(IPR001107)|Band 7/SPFH domain superfamily(IPR036013)	no|down	yes|down	no|down	yes|down	2
MsG0180004483.01	Barwin domain(IPR001153)|Barwin, conserved site(IPR018226)|RlpA-like domain superfamily(IPR036908)	no|up	yes|up	yes|up	no|up	2
MsG0680035452.01	Barwin domain(IPR001153)|Barwin, conserved site(IPR018226)|RlpA-like domain superfamily(IPR036908)	no|up	yes|up	yes|up	no|up	2
MsG0280010798.01	Basic-leucine zipper domain(IPR004827)	no|up	no|up	yes|down	yes|down	2
MsG0780041360.01	Basic-leucine zipper domain(IPR004827)	no|down	no|down	no|down	yes|down	1
MsG0380017579.01	Basic-leucine zipper domain(IPR004827)	no|up	no|up	no|up	yes|up	1
MsG0380018009.01	Basic-leucine zipper domain(IPR004827)	no|up	no|up	no|up	yes|up	1
MsG0780037050.01	Basic-leucine zipper domain(IPR004827)	no|up	yes|down	no|down	no|down	1
MsG0880043905.01	Basic-leucine zipper domain(IPR004827)	no|down	yes|down	no|down	no|down	1
MsG0580024714.01	Basic-leucine zipper domain(IPR004827)	no|down	yes|down	yes|down	yes|down	3
MsG0780041648.01	Basic-leucine zipper domain(IPR004827)|Basic leucine-zipper, C-terminal(IPR020983)	no|down	yes|down	yes|down	yes|down	3
MsG0280010515.01	Basic-leucine zipper domain(IPR004827)|Transcription factor TGA like domain(IPR025422)	no|down	no|down	no|down	yes|down	1
MsG0180005950.01	Bax inhibitor 1-related(IPR006214)	no|up	no|up	no|down	yes|down	1
MsG0780040673.01	Bax inhibitor 1-related(IPR006214)	no|up	no|up	no|up	yes|up	1
MsG0280010642.01	B-box-type zinc finger(IPR000315)	no|up	yes|up	no|up	no|down	1
MsG0580025052.01	B-box-type zinc finger(IPR000315)	no|up	yes|up	no|up	no|up	1
MsG0280011113.01	B-box-type zinc finger(IPR000315)	no|up	yes|up	yes|up	no|up	2
MsG0480018239.01	B-box-type zinc finger(IPR000315)	no|up	yes|up	no|up	no|down	1
MsG0180005912.01	B-box-type zinc finger(IPR000315)	no|down	no|down	yes|down	no|down	1
MsG0780041260.01	B-box-type zinc finger(IPR000315)	no|up	no|down	no|up	yes|up	1
MsG0280009939.01	B-box-type zinc finger(IPR000315)	no|up	yes|down	yes|up	yes|up	3
MsG0380017826.01	B-box-type zinc finger(IPR000315)	no|down	yes|down	no|down	no|down	1
MsG0480021151.01	B-box-type zinc finger(IPR000315)	no|up	yes|up	no|up	no|up	1
MsG0780040008.01	B-box-type zinc finger(IPR000315)|CCT domain(IPR010402)	no|down	yes|down	no|down	no|down	1
MsG0880047512.01	B-box-type zinc finger(IPR000315)|CCT domain(IPR010402)	no|up	yes|up	no|up	no|up	1
MsG0480023881.01	B-box-type zinc finger(IPR000315)|CCT domain(IPR010402)	no|down	no|down	no|down	yes|down	1
MsG0780036747.01	B-box-type zinc finger(IPR000315)|CCT domain(IPR010402)	no|down	yes|up	no|down	no|down	1
MsG0580028352.01	B-box-type zinc finger(IPR000315)|CCT domain(IPR010402)	no|down	yes|down	no|down	no|down	1
MsG0880043441.01	BEACH domain(IPR000409)|WD40 repeat(IPR001680)|Concanavalin A-like lectin/glucanase domain superfamily(IPR013320)|PH-BEACH domain(IPR023362)|Domain of unknown function DUF4704(IPR031570)|WD40-repeat-containing domain superfamily(IPR036322)|BEACH domain superfamily(IPR036372)	no|down	no|down	yes|down	no|down	1
MsG0280009980.01	BES1/BZR1 plant transcription factor, N-terminal(IPR008540)	no|down	no|down	yes|down	yes|down	2
MsG0880043953.01	Bet v I/Major latex protein(IPR000916)|START-like domain superfamily(IPR023393)	no|up	yes|down	no|down	no|down	1
MsG0380014293.01	Bet v I/Major latex protein(IPR000916)|START-like domain superfamily(IPR023393)	no|up	no|down	no|down	yes|down	1
MsG0880043959.01	Bet v I/Major latex protein(IPR000916)|START-like domain superfamily(IPR023393)	no|up	no|down	no|up	yes|down	1
MsG0180001109.01	Bet v I/Major latex protein(IPR000916)|START-like domain superfamily(IPR023393)	no|up	no|up	yes|down	yes|down	2
MsG0280007906.01	Bet v I/Major latex protein(IPR000916)|START-like domain superfamily(IPR023393)|Bet v I type allergen(IPR024949)	yes|up	yes|up	no|up	yes|up	3
MsG0280007915.01	Bet v I/Major latex protein(IPR000916)|START-like domain superfamily(IPR023393)|Bet v I type allergen(IPR024949)	yes|up	no|up	yes|up	yes|up	3
MsG0280007908.01	Bet v I/Major latex protein(IPR000916)|START-like domain superfamily(IPR023393)|Bet v I type allergen(IPR024949)	no|up	yes|up	no|up	no|down	1
MsG0280007911.01	Bet v I/Major latex protein(IPR000916)|START-like domain superfamily(IPR023393)|Bet v I type allergen(IPR024949)	no|up	no|up	yes|up	no|up	1
MsG0280007914.01	Bet v I/Major latex protein(IPR000916)|START-like domain superfamily(IPR023393)|Bet v I type allergen(IPR024949)	yes|up	yes|up	yes|up	yes|up	4
MsG0880047085.01	Bet v I/Major latex protein(IPR000916)|START-like domain superfamily(IPR023393)|Bet v I type allergen(IPR024949)	no|up	yes|up	yes|up	no|up	2
MsG0880047084.01	Bet v I/Major latex protein(IPR000916)|START-like domain superfamily(IPR023393)|Bet v I type allergen(IPR024949)	yes|up	yes|up	yes|up	no|up	3
MsG0280007916.01	Bet v I/Major latex protein(IPR000916)|START-like domain superfamily(IPR023393)|Bet v I type allergen(IPR024949)	no|up	no|up	no|up	yes|up	1
MsG0280007922.01	Bet v I/Major latex protein(IPR000916)|START-like domain superfamily(IPR023393)|Bet v I type allergen(IPR024949)	no|up	no|up	no|up	yes|up	1
MsG0280007912.01	Bet v I/Major latex protein(IPR000916)|START-like domain superfamily(IPR023393)|Bet v I type allergen(IPR024949)	no|up	no|up	yes|up	yes|up	2
MsG0880047081.01	Bet v I/Major latex protein(IPR000916)|START-like domain superfamily(IPR023393)|Bet v I type allergen(IPR024949)	yes|up	yes|up	yes|up	yes|up	4
MsG0380014690.01	Beta tubulin(IPR002453)|IBR domain(IPR002867)|Zinc finger, RING/FYVE/PHD-type(IPR013083)|Zinc finger, RING-type, conserved site(IPR017907)	yes|down	no|down	no|down	no|down	1
MsG0780041393.01	Bicarbonate transporter, C-terminal(IPR011531)	no|up	yes|up	yes|up	yes|up	3
MsG0880043653.01	Bicarbonate transporter, C-terminal(IPR011531)	no|up	no|down	yes|down	no|down	1
MsG0180005590.01	Bifunctional inhibitor/plant lipid transfer protein/seed storage helical domain(IPR016140)|Bifunctional inhibitor/plant lipid transfer protein/seed storage helical domain superfamily(IPR036312)	yes|up	yes|up	no|up	yes|up	3
MsG0880046158.01	Bifunctional inhibitor/plant lipid transfer protein/seed storage helical domain(IPR016140)|Bifunctional inhibitor/plant lipid transfer protein/seed storage helical domain superfamily(IPR036312)	yes|up	no|up	no|up	no|up	1
MsG0180003955.01	Bifunctional inhibitor/plant lipid transfer protein/seed storage helical domain(IPR016140)|Bifunctional inhibitor/plant lipid transfer protein/seed storage helical domain superfamily(IPR036312)	yes|up	yes|up	yes|up	yes|up	4
MsG0780040658.01	Bifunctional inhibitor/plant lipid transfer protein/seed storage helical domain(IPR016140)|Bifunctional inhibitor/plant lipid transfer protein/seed storage helical domain superfamily(IPR036312)	yes|up	yes|up	yes|up	yes|up	4
MsG0580029882.01	Bifunctional inhibitor/plant lipid transfer protein/seed storage helical domain(IPR016140)|Bifunctional inhibitor/plant lipid transfer protein/seed storage helical domain superfamily(IPR036312)	no|up	yes|up	yes|up	yes|up	3
MsG0480023039.01	Bifunctional inhibitor/plant lipid transfer protein/seed storage helical domain(IPR016140)|Bifunctional inhibitor/plant lipid transfer protein/seed storage helical domain superfamily(IPR036312)	no|down	yes|down	yes|down	yes|down	3
MsG0780038373.01	Bifunctional inhibitor/plant lipid transfer protein/seed storage helical domain(IPR016140)|Bifunctional inhibitor/plant lipid transfer protein/seed storage helical domain superfamily(IPR036312)	no|up	no|up	yes|up	yes|up	2
MsG0880046434.01	Bifunctional inhibitor/plant lipid transfer protein/seed storage helical domain(IPR016140)|Hydrophobic seed protein(IPR027923)|Bifunctional inhibitor/plant lipid transfer protein/seed storage helical domain superfamily(IPR036312)	no|down	no|up	yes|down	yes|down	2
MsG0380017793.01	Bifunctional nuclease domain(IPR003729)|Bifunctional nuclease superfamily(IPR036104)	no|down	yes|down	yes|down	yes|down	3
MsG0180001500.01	Biogenesis of lysosome-related organelles complex-1, subunit 2(IPR019269)	no|down	no|down	no|down	yes|down	1
MsG0880047064.01	Biotin/lipoyl attachment(IPR000089)|2-oxoacid dehydrogenase acyltransferase, catalytic domain(IPR001078)|2-oxo acid dehydrogenase, lipoyl-binding site(IPR003016)|Peripheral subunit-binding domain(IPR004167)|Single hybrid motif(IPR011053)|Chloramphenicol acetyltransferase-like domain superfamily(IPR023213)|E3-binding domain superfamily(IPR036625)	no|down	yes|down	yes|down	no|down	2
MsG0180003950.01	Biotin/lipoyl attachment(IPR000089)|Biotin-binding site(IPR001882)|Carbamoyl-phosphate synthetase large subunit-like, ATP-binding domain(IPR005479)|Biotin carboxylase-like, N-terminal domain(IPR005481)|Biotin carboxylase, C-terminal(IPR005482)|Single hybrid motif(IPR011053)|Rudiment single hybrid motif(IPR011054)|Pre-ATP-grasp domain superfamily(IPR016185)	no|down	yes|down	yes|down	no|down	2
MsG0880045445.01	Brevis radix (BRX) domain(IPR013591)|Transcription factor BREVIS RADIX, N-terminal domain(IPR027988)	no|down	no|down	no|up	yes|down	1
MsG0780039991.01	BRO1 domain(IPR004328)|BRO1 domain superfamily(IPR038499)	no|up	yes|up	no|up	no|down	1
MsG0280010733.01	Bromo adjacent homology (BAH) domain(IPR001025)|Zinc finger, PHD-type(IPR001965)|UBA-like domain DUF1421(IPR010820)|Zinc finger, FYVE/PHD-type(IPR011011)|Zinc finger, RING/FYVE/PHD-type(IPR013083)|Zinc finger, PHD-type, conserved site(IPR019786)|Zinc finger, PHD-finger(IPR019787)	no|down	yes|down	no|down	no|down	1
MsG0580028282.01	BTB/POZ domain(IPR000210)|Galactose-binding-like domain superfamily(IPR008979)|SKP1/BTB/POZ domain superfamily(IPR011333)|BTB/Kelch-associated(IPR011705)|Farnesoic acid O-methyl transferase(IPR022041)	no|down	yes|down	yes|down	yes|down	3
MsG0380015543.01	BTB/POZ domain(IPR000210)|NB-ARC(IPR002182)|Hypoxia induced protein, domain(IPR007667)|SKP1/BTB/POZ domain superfamily(IPR011333)|P-loop containing nucleoside triphosphate hydrolase(IPR027417)|Leucine-rich repeat domain superfamily(IPR032675)|Winged helix DNA-binding domain superfamily(IPR036390)	no|down	no|down	no|down	yes|down	1
MsG0480023658.01	BTB/POZ domain(IPR000210)|Potassium channel tetramerisation-type BTB domain(IPR003131)|SKP1/BTB/POZ domain superfamily(IPR011333)|WD40/YVTN repeat-like-containing domain superfamily(IPR015943)|WD40-repeat-containing domain superfamily(IPR036322)	yes|up	yes|up	no|up	no|up	2
MsG0180005769.01	BTB/POZ domain(IPR000210)|SKP1/BTB/POZ domain superfamily(IPR011333)|NPH3 domain(IPR027356)	no|down	no|down	yes|down	yes|down	2
MsG0880045969.01	BTB/POZ domain(IPR000210)|SKP1/BTB/POZ domain superfamily(IPR011333)|NPH3 domain(IPR027356)	no|up	no|up	yes|up	yes|up	2
MsG0080048738.01	BTB/POZ domain(IPR000210)|SKP1/BTB/POZ domain superfamily(IPR011333)|NPH3 domain(IPR027356)	no|down	no|down	yes|down	yes|down	2
MsG0280010465.01	BTB/POZ domain(IPR000210)|SKP1/BTB/POZ domain superfamily(IPR011333)|NPH3 domain(IPR027356)	no|up	no|up	no|down	yes|down	1
MsG0180000534.01	BTB/POZ domain(IPR000210)|SKP1/BTB/POZ domain superfamily(IPR011333)|NPH3 domain(IPR027356)	no|down	no|up	no|down	yes|down	1
MsG0280010019.01	Bulb-type lectin domain(IPR001480)|Bulb-type lectin domain superfamily(IPR036426)	yes|up	no|up	no|down	yes|up	2
MsG0280010055.01	Bulb-type lectin domain(IPR001480)|PAN/Apple domain(IPR003609)|S-locus-specific glycoprotein/EP1(IPR035446)|Bulb-type lectin domain superfamily(IPR036426)	no|up	yes|down	no|down	no|down	1
MsG0280009616.01	Bulb-type lectin domain(IPR001480)|Thaumatin(IPR001938)|Bulb-type lectin domain superfamily(IPR036426)|Osmotin/thaumatin-like superfamily(IPR037176)	yes|up	yes|up	no|up	yes|up	3
MsG0380017590.01	BURP domain(IPR004873)	no|up	yes|up	yes|up	yes|up	3
MsG0880045066.01	BURP domain(IPR004873)	no|down	no|down	no|down	yes|down	1
MsG0280010303.01	BURP domain(IPR004873)	no|up	no|up	no|down	yes|down	1
MsG0880044027.01	BURP domain(IPR004873)	no|up	yes|up	no|up	no|up	1
MsG0380017618.01	BURP domain(IPR004873)	no|up	yes|up	yes|up	yes|up	3
MsG0480021236.01	BURP domain(IPR004873)	no|down	no|down	yes|down	yes|down	2
MsG0880045071.01	BURP domain(IPR004873)	no|down	no|down	yes|down	yes|down	2
MsG0280010300.01	BURP domain(IPR004873)	yes|up	yes|up	no|up	no|down	2
MsG0880043998.01	BURP domain(IPR004873)	no|up	no|up	yes|up	no|up	1
MsG0680031053.01	BURP domain(IPR004873)	no|up	no|up	no|up	yes|up	1
MsG0880044026.01	BURP domain(IPR004873)	no|down	yes|up	no|up	no|up	1
MsG0880044028.01	BURP domain(IPR004873)	no|up	yes|up	no|up	no|up	1
MsG0880044001.01	BURP domain(IPR004873)	no|up	yes|up	yes|up	no|up	2
MsG0380017986.01	BURP domain(IPR004873)	no|down	no|up	yes|down	yes|down	2
MsG0180004461.01	C2 domain(IPR000008)|C2 domain superfamily(IPR035892)	no|up	no|up	yes|up	no|up	1
MsG0680032652.01	C2 domain(IPR000008)|C2 domain superfamily(IPR035892)	yes|up	yes|up	yes|up	no|up	3
MsG0580029006.01	C2 domain(IPR000008)|C2 domain superfamily(IPR035892)	no|up	yes|up	yes|up	no|up	2
MsG0780040112.01	C2 domain(IPR000008)|C2 domain superfamily(IPR035892)	no|up	yes|up	no|up	no|down	1
MsG0880043286.01	C2 domain(IPR000008)|C2 domain superfamily(IPR035892)	yes|up	yes|up	yes|up	no|up	3
MsG0680032631.01	C2 domain(IPR000008)|C2 domain superfamily(IPR035892)	no|up	yes|up	yes|down	no|down	2
MsG0480021738.01	C2 domain(IPR000008)|C2 domain superfamily(IPR035892)	no|up	no|up	yes|up	no|up	1
MsG0180001130.01	C2 domain(IPR000008)|C2 domain superfamily(IPR035892)	no|up	yes|up	no|down	no|up	1
MsG0380016302.01	C2 domain(IPR000008)|C2 domain superfamily(IPR035892)	no|up	no|up	no|down	yes|down	1
MsG0880043261.01	C2 domain(IPR000008)|C2 domain superfamily(IPR035892)	no|up	no|up	yes|up	yes|up	2
MsG0580029002.01	C2 domain(IPR000008)|C2 domain superfamily(IPR035892)	no|up	yes|up	no|up	no|up	1
MsG0880043279.01	C2 domain(IPR000008)|C2 domain superfamily(IPR035892)	no|up	yes|up	yes|up	no|down	2
MsG0780041596.01	C2 domain(IPR000008)|C2 domain superfamily(IPR035892)|Copine, C2B domain(IPR037768)	no|down	no|down	no|down	yes|down	1
MsG0780039665.01	C2 domain(IPR000008)|Exoribonuclease, phosphorolytic domain 1(IPR001247)|Lipopolysaccharide-modifying protein(IPR006598)|Phosphoribosyltransferase C-terminal(IPR013583)|Ribosomal protein S5 domain 2-type fold(IPR020568)|PNPase/RNase PH domain superfamily(IPR027408)|C2 domain superfamily(IPR035892)	no|up	no|down	no|down	yes|down	1
MsG0580024396.01	C2 domain(IPR000008)|Exostosin-like(IPR004263)|Phosphoribosyltransferase C-terminal(IPR013583)|C2 domain superfamily(IPR035892)	no|down	no|up	no|down	yes|down	1
MsG0380016698.01	C2 domain(IPR000008)|GNAT domain(IPR000182)|Cytochrome P450(IPR001128)|Acyl-CoA N-acyltransferase(IPR016181)|C2 domain superfamily(IPR035892)|Cytochrome P450 superfamily(IPR036396)	no|up	no|down	no|down	yes|down	1
MsG0580028432.01	C2 domain(IPR000008)|Phosphatidylinositol-specific phospholipase C, X domain(IPR000909)|Phosphoinositide phospholipase C family(IPR001192)|Phospholipase C, phosphatidylinositol-specific, Y domain(IPR001711)|EF-hand domain pair(IPR011992)|PLC-like phosphodiesterase, TIM beta/alpha-barrel domain superfamily(IPR017946)|C2 domain superfamily(IPR035892)	no|down	no|down	no|down	yes|down	1
MsG0580029195.01	C2 domain(IPR000008)|Phosphatidylinositol-specific phospholipase C, X domain(IPR000909)|Phosphoinositide phospholipase C family(IPR001192)|Phospholipase C, phosphatidylinositol-specific, Y domain(IPR001711)|EF-hand domain pair(IPR011992)|PLC-like phosphodiesterase, TIM beta/alpha-barrel domain superfamily(IPR017946)|C2 domain superfamily(IPR035892)	no|up	yes|down	no|down	no|down	1
MsG0380015468.01	C2 domain(IPR000008)|Phosphatidylinositol-specific phospholipase C, X domain(IPR000909)|Phosphoinositide phospholipase C family(IPR001192)|Phospholipase C, phosphatidylinositol-specific, Y domain(IPR001711)|EF-hand domain pair(IPR011992)|PLC-like phosphodiesterase, TIM beta/alpha-barrel domain superfamily(IPR017946)|C2 domain superfamily(IPR035892)	no|up	yes|up	yes|up	no|up	2
MsG0380017421.01	C2 domain(IPR000008)|Phospholipase D/Transphosphatidylase(IPR001736)|Phospholipase D, C-terminal(IPR024632)|C2 domain superfamily(IPR035892)	no|down	no|down	yes|down	yes|down	2
MsG0480018362.01	C2 domain(IPR000008)|Phospholipase D/Transphosphatidylase(IPR001736)|Phospholipase D, plant(IPR011402)|Phospholipase D, C-terminal(IPR024632)|C2 domain superfamily(IPR035892)	no|down	no|up	no|down	yes|down	1
MsG0380017894.01	C2 domain(IPR000008)|Phospholipase D/Transphosphatidylase(IPR001736)|Phospholipase D, plant(IPR011402)|Phospholipase D, C-terminal(IPR024632)|Phospholipase D-like domain(IPR025202)|C2 domain superfamily(IPR035892)	no|up	no|up	yes|up	yes|up	2
MsG0480019540.01	C2 domain(IPR000008)|Phosphoribosyltransferase C-terminal(IPR013583)|C2 domain superfamily(IPR035892)	no|down	yes|down	no|down	no|down	1
MsG0480019124.01	C2 domain(IPR000008)|Phosphoribosyltransferase C-terminal(IPR013583)|C2 domain superfamily(IPR035892)	no|up	no|down	yes|down	yes|down	2
MsG0680031616.01	C2 domain(IPR000008)|Phosphoribosyltransferase C-terminal(IPR013583)|C2 domain superfamily(IPR035892)	no|down	no|down	yes|down	yes|down	2
MsG0480019113.01	C2 domain(IPR000008)|Phosphoribosyltransferase C-terminal(IPR013583)|C2 domain superfamily(IPR035892)	no|down	no|down	no|down	yes|down	1
MsG0680031672.01	C2 domain(IPR000008)|Phosphoribosyltransferase C-terminal(IPR013583)|C2 domain superfamily(IPR035892)	no|up	no|up	no|down	yes|down	1
MsG0780039862.01	C2 domain(IPR000008)|Synaptotagmin-like mitochondrial-lipid-binding domain(IPR031468)|C2 domain superfamily(IPR035892)	no|down	no|down	yes|down	no|down	1
MsG0180005191.01	C2 domain(IPR000008)|Synaptotagmin-like mitochondrial-lipid-binding domain(IPR031468)|C2 domain superfamily(IPR035892)	no|up	no|up	no|up	yes|up	1
MsG0880042857.01	Calcineurin-like phosphoesterase domain, ApaH type(IPR004843)|Phosphoesterase At2g46880(IPR011230)	no|up	yes|up	yes|up	yes|up	3
MsG0480019733.01	Calcineurin-like phosphoesterase domain, ApaH type(IPR004843)|Purple acid phosphatase-like, N-terminal(IPR008963)|Purple acid phosphatase, N-terminal(IPR015914)|Iron/zinc purple acid phosphatase-like C-terminal domain(IPR025733)|Metallo-dependent phosphatase-like(IPR029052)	no|up	yes|up	no|up	yes|up	2
MsG0380015682.01	Calcineurin-like phosphoesterase domain, ApaH type(IPR004843)|Purple acid phosphatase-like, N-terminal(IPR008963)|Purple acid phosphatase, N-terminal(IPR015914)|Iron/zinc purple acid phosphatase-like C-terminal domain(IPR025733)|Metallo-dependent phosphatase-like(IPR029052)	no|down	yes|down	yes|down	yes|down	3
MsG0380016120.01	Calcineurin-like phosphoesterase domain, ApaH type(IPR004843)|Purple acid phosphatase-like, N-terminal(IPR008963)|Purple acid phosphatase, N-terminal(IPR015914)|Iron/zinc purple acid phosphatase-like C-terminal domain(IPR025733)|Metallo-dependent phosphatase-like(IPR029052)	no|down	no|down	yes|down	yes|down	2
MsG0380015680.01	Calcineurin-like phosphoesterase domain, ApaH type(IPR004843)|Purple acid phosphatase-like, N-terminal(IPR008963)|Purple acid phosphatase, N-terminal(IPR015914)|Iron/zinc purple acid phosphatase-like C-terminal domain(IPR025733)|Metallo-dependent phosphatase-like(IPR029052)	no|up	yes|up	no|up	no|down	1
MsG0080047987.01	Calcineurin-like phosphoesterase domain, ApaH type(IPR004843)|Serine/threonine-specific protein phosphatase/bis(5-nucleosyl)-tetraphosphatase(IPR006186)|Metallo-dependent phosphatase-like(IPR029052)|Serine-threonine protein phosphatase, N-terminal(IPR031675)	no|up	yes|up	no|up	no|up	1
MsG0180004085.01	Calcineurin-like phosphoesterase domain, ApaH type(IPR004843)|Serine/threonine-specific protein phosphatase/bis(5-nucleosyl)-tetraphosphatase(IPR006186)|Metallo-dependent phosphatase-like(IPR029052)|Serine-threonine protein phosphatase, N-terminal(IPR031675)	no|up	yes|up	yes|up	yes|up	3
MsG0680034489.01	Calcium-dependent channel, 7TM region, putative phosphate(IPR003864)	no|down	yes|down	yes|down	no|down	2
MsG0680030842.01	Calcium-dependent channel, 7TM region, putative phosphate(IPR003864)|10TM putative phosphate transporter, cytosolic domain(IPR027815)|Calcium permeable stress-gated cation channel 1, N-terminal transmembrane domain(IPR032880)	no|down	yes|down	yes|down	yes|down	3
MsG0280006998.01	Calcium-dependent channel, 7TM region, putative phosphate(IPR003864)|10TM putative phosphate transporter, cytosolic domain(IPR027815)|Calcium permeable stress-gated cation channel 1, N-terminal transmembrane domain(IPR032880)	no|up	no|down	no|down	yes|down	1
MsG0880046502.01	Calmodulin-binding domain, plant(IPR012417)	no|down	yes|down	yes|down	yes|down	3
MsG0480023900.01	CALMODULIN-BINDING PROTEIN60(IPR012416)	yes|up	yes|up	yes|up	no|up	3
MsG0880046362.01	CALMODULIN-BINDING PROTEIN60(IPR012416)	yes|up	yes|up	yes|up	no|up	3
MsG0480023898.01	CALMODULIN-BINDING PROTEIN60(IPR012416)	yes|up	yes|up	yes|up	yes|up	4
MsG0080048650.01	CALMODULIN-BINDING PROTEIN60(IPR012416)	yes|up	yes|up	yes|up	yes|up	4
MsG0480022495.01	CALMODULIN-BINDING PROTEIN60(IPR012416)	yes|up	yes|up	yes|up	no|up	3
MsG0880042413.01	Calponin homology domain(IPR001715)|CH domain superfamily(IPR036872)	no|down	no|down	no|down	yes|down	1
MsG0880042090.01	Calponin homology domain(IPR001715)|CH domain superfamily(IPR036872)	no|down	no|down	no|down	yes|down	1
MsG0380016928.01	Calreticulin/calnexin(IPR001580)|Calreticulin/calnexin, P domain superfamily(IPR009033)|Concanavalin A-like lectin/glucanase domain superfamily(IPR013320)|Calreticulin/calnexin, conserved site(IPR018124)	no|up	no|up	no|up	yes|up	1
MsG0380016788.01	Carbamoyl-phosphate synthase small subunit, N-terminal domain(IPR002474)|Glutamine amidotransferase(IPR017926)|Class I glutamine amidotransferase-like(IPR029062)|Carbamoyl-phosphate synthase small subunit, GATase1 domain(IPR035686)|Carbamoyl-phosphate synthase small subunit, N-terminal domain superfamily(IPR036480)	no|down	no|down	no|up	yes|up	1
MsG0380017707.01	Carbohydrate kinase, FGGY(IPR000577)|Carbohydrate kinase, FGGY, N-terminal(IPR018484)|Carbohydrate kinase, FGGY, C-terminal(IPR018485)	no|down	yes|down	yes|down	no|down	2
MsG0380015811.01	Carbonic anhydrase(IPR001765)|Carbonic anhydrase, prokaryotic-like, conserved site(IPR015892)|Carbonic anhydrase superfamily(IPR036874)	no|down	yes|down	no|down	no|down	1
MsG0580027939.01	Carbonic anhydrase(IPR001765)|Carbonic anhydrase, prokaryotic-like, conserved site(IPR015892)|Carbonic anhydrase superfamily(IPR036874)	no|down	yes|down	no|down	no|down	1
MsG0480022625.01	Carbon-nitrogen hydrolase(IPR003010)|Carbon-nitrogen hydrolase superfamily(IPR036526)	no|up	no|up	no|up	yes|up	1
MsG0280009781.01	Carotenoid oxygenase(IPR004294)	no|up	no|up	yes|up	yes|up	2
MsG0780036300.01	Casparian strip membrane protein(IPR006459)|Domain of unknown function DUF588(IPR006702)	no|up	no|up	no|down	yes|down	1
MsG0880046996.01	Casparian strip membrane protein(IPR006459)|Domain of unknown function DUF588(IPR006702)	no|down	yes|down	no|down	no|down	1
MsG0180003322.01	Casparian strip membrane protein(IPR006459)|Domain of unknown function DUF588(IPR006702)	no|down	no|down	yes|down	yes|down	2
MsG0480022078.01	Casparian strip membrane protein(IPR006459)|Domain of unknown function DUF588(IPR006702)	no|down	no|down	yes|down	yes|down	2
MsG0280008659.01	Casparian strip membrane protein(IPR006459)|Domain of unknown function DUF588(IPR006702)	yes|up	yes|up	yes|up	yes|up	4
MsG0580026210.01	Casparian strip membrane protein(IPR006459)|Domain of unknown function DUF588(IPR006702)	no|up	no|down	yes|down	yes|down	2
MsG0780039992.01	Casparian strip membrane protein(IPR006459)|Domain of unknown function DUF588(IPR006702)	no|up	no|up	no|down	yes|down	1
MsG0180003320.01	Casparian strip membrane protein(IPR006459)|Domain of unknown function DUF588(IPR006702)	no|up	no|down	yes|down	yes|down	2
MsG0780040308.01	Caspase-like domain superfamily(IPR029030)	no|up	no|down	no|down	yes|down	1
MsG0880044106.01	Cation efflux protein(IPR002524)|Cation efflux transmembrane domain superfamily(IPR027469)|Cation efflux protein, cytoplasmic domain(IPR027470)|Cation efflux protein, cytoplasmic domain superfamily(IPR036837)	no|up	no|down	yes|down	yes|down	2
MsG0380015935.01	Cation efflux protein(IPR002524)|Cation efflux transmembrane domain superfamily(IPR027469)|Cation efflux protein, cytoplasmic domain(IPR027470)|Cation efflux protein, cytoplasmic domain superfamily(IPR036837)	no|down	no|down	yes|down	no|down	1
MsG0680035892.01	Cation transporter(IPR003445)	no|down	yes|up	no|up	no|down	1
MsG0680035899.01	Cation transporter(IPR003445)	no|up	yes|up	no|up	no|up	1
MsG0780036687.01	Cation transporter(IPR003445)	no|up	yes|up	no|up	no|up	1
MsG0880046993.01	Cation/H+ exchanger(IPR006153)	no|up	no|up	no|down	yes|down	1
MsG0580030081.01	Cation-transporting P-type ATPase, C-terminal(IPR006068)|P-type ATPase, A domain superfamily(IPR008250)|HAD superfamily(IPR023214)|P-type ATPase, transmembrane domain superfamily(IPR023298)|P-type ATPase, cytoplasmic domain N(IPR023299)|HAD-like superfamily(IPR036412)	no|up	yes|up	yes|up	no|up	2
MsG0880046227.01	CBS domain(IPR000644)	no|down	yes|down	yes|down	no|down	2
MsG0380017779.01	CBS domain(IPR000644)	no|down	no|down	yes|down	yes|down	2
MsG0580028755.01	CBS domain(IPR000644)	no|down	no|down	yes|down	yes|down	2
MsG0780040752.01	CBS domain(IPR000644)|Sugar isomerase (SIS)(IPR001347)	no|up	yes|up	no|up	no|down	1
MsG0580028957.01	CCAAT-binding factor(IPR005612)	no|up	yes|up	yes|up	no|up	2
MsG0480022700.01	Ccc1 family(IPR008217)	no|up	yes|up	no|up	no|up	1
MsG0480022699.01	Ccc1 family(IPR008217)	no|down	yes|up	no|up	no|up	1
MsG0280010978.01	CCT domain(IPR010402)	no|down	no|up	no|up	yes|up	1
MsG0180000798.01	CCT domain(IPR010402)	no|down	yes|down	no|down	no|up	1
MsG0780041807.01	CCT domain(IPR010402)|CheY-like superfamily(IPR011006)	no|up	yes|up	yes|up	no|up	2
MsG0280010942.01	CDC48, N-terminal subdomain(IPR003338)|AAA+ ATPase domain(IPR003593)|ATPase, AAA-type, core(IPR003959)|ATPase, AAA-type, conserved site(IPR003960)|CDC48, domain 2(IPR004201)|AAA ATPase, CDC48 family(IPR005938)|Aspartate decarboxylase-like domain superfamily(IPR009010)|P-loop containing nucleoside triphosphate hydrolase(IPR027417)|CDC48 domain 2-like superfamily(IPR029067)	no|down	yes|down	no|down	no|down	1
MsG0180003857.01	CDT1 Geminin-binding domain-like(IPR014939)|DNA replication factor Cdt1, C-terminal(IPR032054)|Winged helix DNA-binding domain superfamily(IPR036390)	no|up	yes|up	no|up	no|down	1
MsG0380014561.01	Cellulose synthase(IPR005150)	no|up	no|down	no|up	yes|up	1
MsG0480021859.01	Cellulose synthase(IPR005150)	yes|up	yes|up	yes|up	no|up	3
MsG0480022319.01	Cellulose synthase(IPR005150)|Nucleotide-diphospho-sugar transferases(IPR029044)	no|up	no|up	yes|up	yes|up	2
MsG0480021653.01	Cellulose synthase(IPR005150)|Nucleotide-diphospho-sugar transferases(IPR029044)	yes|up	yes|up	no|up	no|up	2
MsG0280010585.01	Cellulose synthase(IPR005150)|Nucleotide-diphospho-sugar transferases(IPR029044)	no|down	no|down	yes|down	no|down	1
MsG0280009182.01	Cellulose synthase(IPR005150)|Nucleotide-diphospho-sugar transferases(IPR029044)	no|up	no|up	no|up	yes|up	1
MsG0180004053.01	Cellulose synthase(IPR005150)|Nucleotide-diphospho-sugar transferases(IPR029044)	no|up	no|up	yes|up	yes|up	2
MsG0380011504.01	Cellulose synthase(IPR005150)|Nucleotide-diphospho-sugar transferases(IPR029044)	no|up	yes|up	no|down	yes|down	2
MsG0380011648.01	Cellulose synthase(IPR005150)|Nucleotide-diphospho-sugar transferases(IPR029044)	no|down	no|down	yes|down	yes|down	2
MsG0480023418.01	Cellulose synthase(IPR005150)|Zinc finger, RING/FYVE/PHD-type(IPR013083)|Cellulose synthase, RING-type zinc finger(IPR027934)|Nucleotide-diphospho-sugar transferases(IPR029044)	no|up	yes|up	no|up	no|up	1
MsG0280008107.01	Cellulose synthase(IPR005150)|Zinc finger, RING/FYVE/PHD-type(IPR013083)|Cellulose synthase, RING-type zinc finger(IPR027934)|Nucleotide-diphospho-sugar transferases(IPR029044)	no|up	no|down	yes|down	yes|down	2
MsG0580025441.01	Cellulose synthase(IPR005150)|Zinc finger, RING/FYVE/PHD-type(IPR013083)|Nucleotide-diphospho-sugar transferases(IPR029044)	yes|up	yes|up	yes|up	no|up	3
MsG0180006187.01	Chalcone isomerase(IPR016087)|Chalcone isomerase, orthogonal bundle domain superfamily(IPR016089)|Chalcone isomerase superfamily(IPR036298)	no|up	no|up	yes|up	no|up	1
MsG0380016127.01	Chalcone/stilbene synthase, N-terminal(IPR001099)|Chalcone/stilbene synthase, C-terminal(IPR012328)|Thiolase-like(IPR016039)	no|up	no|up	yes|up	yes|up	2
MsG0080048347.01	Chalcone/stilbene synthase, N-terminal(IPR001099)|Chalcone/stilbene synthase, C-terminal(IPR012328)|Thiolase-like(IPR016039)	yes|up	no|up	yes|up	no|up	2
MsG0080048352.01	Chalcone/stilbene synthase, N-terminal(IPR001099)|Chalcone/stilbene synthase, C-terminal(IPR012328)|Thiolase-like(IPR016039)	no|up	no|up	yes|up	no|up	1
MsG0580024220.01	Chalcone/stilbene synthase, N-terminal(IPR001099)|Chalcone/stilbene synthase, C-terminal(IPR012328)|Thiolase-like(IPR016039)|Chalcone/stilbene synthase, active site(IPR018088)	no|up	no|down	no|up	yes|up	1
MsG0380016129.01	Chalcone/stilbene synthase, N-terminal(IPR001099)|Chalcone/stilbene synthase, C-terminal(IPR012328)|Thiolase-like(IPR016039)|Chalcone/stilbene synthase, active site(IPR018088)	no|up	no|up	yes|up	no|up	1
MsG0580024260.01	Chalcone/stilbene synthase, N-terminal(IPR001099)|Chalcone/stilbene synthase, C-terminal(IPR012328)|Thiolase-like(IPR016039)|Chalcone/stilbene synthase, active site(IPR018088)	no|up	no|up	no|up	yes|up	1
MsG0080048348.01	Chalcone/stilbene synthase, N-terminal(IPR001099)|Chalcone/stilbene synthase, C-terminal(IPR012328)|Thiolase-like(IPR016039)|Chalcone/stilbene synthase, active site(IPR018088)	yes|up	yes|up	yes|up	yes|up	4
MsG0180005356.01	Chalcone/stilbene synthase, N-terminal(IPR001099)|Chalcone/stilbene synthase, C-terminal(IPR012328)|Thiolase-like(IPR016039)|Chalcone/stilbene synthase, active site(IPR018088)	no|up	no|up	yes|up	no|up	1
MsG0080048345.01	Chalcone/stilbene synthase, N-terminal(IPR001099)|Polyketide synthase, type III(IPR011141)|Chalcone/stilbene synthase, C-terminal(IPR012328)|Thiolase-like(IPR016039)	yes|up	no|up	yes|up	yes|up	3
MsG0780040080.01	Chalcone/stilbene synthase, N-terminal(IPR001099)|Polyketide synthase, type III(IPR011141)|Chalcone/stilbene synthase, C-terminal(IPR012328)|Thiolase-like(IPR016039)|Chalcone/stilbene synthase, active site(IPR018088)	no|up	yes|up	yes|up	no|up	2
MsG0180005357.01	Chalcone/stilbene synthase, N-terminal(IPR001099)|Polyketide synthase, type III(IPR011141)|Chalcone/stilbene synthase, C-terminal(IPR012328)|Thiolase-like(IPR016039)|Chalcone/stilbene synthase, active site(IPR018088)	yes|up	no|up	yes|up	no|up	2
MsG0380016409.01	Chalcone/stilbene synthase, N-terminal(IPR001099)|Polyketide synthase, type III(IPR011141)|Chalcone/stilbene synthase, C-terminal(IPR012328)|Thiolase-like(IPR016039)|Chalcone/stilbene synthase, active site(IPR018088)	yes|down	yes|down	yes|down	no|down	3
MsG0180005358.01	Chalcone/stilbene synthase, N-terminal(IPR001099)|Polyketide synthase, type III(IPR011141)|Chalcone/stilbene synthase, C-terminal(IPR012328)|Thiolase-like(IPR016039)|Chalcone/stilbene synthase, active site(IPR018088)	yes|up	yes|up	yes|up	yes|up	4
MsG0280009253.01	Chalcone/stilbene synthase, N-terminal(IPR001099)|Six-bladed beta-propeller, TolB-like(IPR011042)|Chalcone/stilbene synthase, C-terminal(IPR012328)|Thiolase-like(IPR016039)|Chalcone/stilbene synthase, active site(IPR018088)|Strictosidine synthase, conserved region(IPR018119)	no|down	no|down	no|down	yes|down	1
MsG0480022908.01	Chaperone J-domain superfamily(IPR036869)	no|down	no|down	no|down	yes|down	1
MsG0480023967.01	Chaperonin Cpn60/TCP-1 family(IPR002423)|Chaperone tailless complex polypeptide 1 (TCP-1)(IPR017998)|GroEL-like apical domain superfamily(IPR027409)|TCP-1-like chaperonin intermediate domain superfamily(IPR027410)|GroEL-like equatorial domain superfamily(IPR027413)|Leucine-rich repeat domain superfamily(IPR032675)	no|up	yes|up	no|up	yes|up	2
MsG0780040462.01	CheY-like superfamily(IPR011006)	no|up	no|up	yes|up	yes|up	2
MsG0780041652.01	Chitin-binding, type 1(IPR001002)|Barwin domain(IPR001153)|Barwin, conserved site(IPR018226)|Chitin-binding, type 1, conserved site(IPR018371)|Endochitinase-like superfamily(IPR036861)|RlpA-like domain superfamily(IPR036908)	yes|up	yes|up	yes|up	yes|up	4
MsG0180005555.01	Chlorophyll A-B binding protein(IPR022796)	no|down	no|up	yes|up	yes|up	2
MsG0280010281.01	Chlorophyll A-B binding protein(IPR022796)|Chlorophyll a/b binding domain superfamily(IPR023329)	no|up	yes|up	yes|up	no|up	2
MsG0680035348.01	Chlorophyllase(IPR017395)|Alpha/Beta hydrolase fold(IPR029058)	no|up	no|up	yes|up	yes|up	2
MsG0580029606.01	Chloroquine-resistance transporter-like(IPR013936)	no|up	no|up	yes|up	yes|up	2
MsG0580026282.01	Chorismate mutase type II superfamily(IPR036263)|Chorismate mutase, AroQ class superfamily, eukaryotic(IPR037039)	no|down	no|down	no|down	yes|down	1
MsG0180000530.01	Chorismate mutase, AroQ class, eukaryotic type(IPR008238)|Chorismate mutase type II superfamily(IPR036263)|Chorismate mutase, AroQ class superfamily, eukaryotic(IPR037039)	no|up	no|down	no|down	yes|down	1
MsG0380015809.01	Chromo/chromo shadow domain(IPR000953)|Chromo-like domain superfamily(IPR016197)|RST domain of plant C-terminal(IPR022003)	no|down	no|up	no|up	yes|up	1
MsG0780036992.01	Chromo/chromo shadow domain(IPR000953)|DC1(IPR004146)	no|down	no|up	no|up	yes|up	1
MsG0780039134.01	Chromo-like domain superfamily(IPR016197)	no|up	no|up	yes|up	yes|up	2
MsG0580027169.01	Chromosome segregation protein Spc25(IPR013255)	no|down	yes|down	no|down	no|down	1
MsG0580029748.01	Citrate synthase(IPR002020)|Citrate synthase-like, large alpha subdomain(IPR016142)|Citrate synthase-like, small alpha subdomain(IPR016143)|Citrate synthase active site(IPR019810)|Citrate synthase, bacterial-type(IPR024176)|Citrate synthase superfamily(IPR036969)	yes|down	no|down	no|down	no|up	1
MsG0380014807.01	Clathrin, heavy chain/VPS, 7-fold repeat(IPR000547)|Tetratricopeptide-like helical domain superfamily(IPR011990)|Clathrin, heavy chain, linker, core motif(IPR015348)|Armadillo-type fold(IPR016024)|Clathrin heavy chain, N-terminal(IPR016025)|Clathrin, heavy chain(IPR016341)|Clathrin, heavy chain, propeller repeat(IPR022365)	no|down	no|up	no|down	yes|down	1
MsG0780041516.01	Clathrin/coatomer adaptor, adaptin-like, N-terminal(IPR002553)|Coatomer beta subunit, C-terminal(IPR011710)|Armadillo-like helical(IPR011989)|Armadillo-type fold(IPR016024)|Coatomer beta subunit (COPB1)(IPR016460)|Coatomer beta subunit, appendage platform domain(IPR029446)	no|down	no|down	yes|down	yes|down	2
MsG0180003281.01	Clp, N-terminal domain superfamily(IPR036628)	no|down	no|down	yes|down	yes|down	2
MsG0180004970.01	Clp, N-terminal(IPR004176)|Clp, N-terminal domain superfamily(IPR036628)	no|down	no|down	yes|down	yes|down	2
MsG0380014583.01	ClpA/B family(IPR001270)|AAA+ ATPase domain(IPR003593)|ATPase, AAA-type, core(IPR003959)|Clp, N-terminal(IPR004176)|Clp ATPase, C-terminal(IPR019489)|P-loop containing nucleoside triphosphate hydrolase(IPR027417)|ClpA/B, conserved site 2(IPR028299)|Clp, N-terminal domain superfamily(IPR036628)	yes|up	yes|up	no|up	no|up	2
MsG0080048885.01	ClpP/crotonase-like domain superfamily(IPR029045)|Acetyl-CoA carboxylase(IPR034733)	no|down	yes|down	yes|down	yes|down	3
MsG0780040014.01	Cobalamin-independent methionine synthase MetE, C-terminal/archaeal(IPR002629)|Cobalamin-independent methionine synthase(IPR006276)|Cobalamin-independent methionine synthase MetE, N-terminal(IPR013215)|UROD/MetE-like superfamily(IPR038071)	yes|up	no|up	yes|up	yes|up	3
MsG0080048059.01	CobN/magnesium chelatase(IPR003672)|Magnesium-chelatase, subunit H(IPR011771)|Magnesium chelatase, subunit H, N-terminal(IPR022571)	no|down	yes|up	yes|up	no|up	2
MsG0280009329.01	COBRA, plant(IPR006918)	no|up	yes|up	no|up	no|up	1
MsG0680031004.01	COBRA, plant(IPR006918)	no|up	no|down	no|down	yes|down	1
MsG0380018044.01	COBRA, plant(IPR006918)|Nucleoside phosphorylase superfamily(IPR035994)	no|up	no|up	yes|up	yes|up	2
MsG0480023505.01	Coenzyme Q-binding protein COQ10, START domain(IPR005031)|START-like domain superfamily(IPR023393)	no|up	yes|up	yes|up	no|up	2
MsG0380015087.01	Coiled-coil domain containing protein 109, C-terminal(IPR006769)	yes|up	yes|up	no|up	no|up	2
MsG0580024923.01	Coiled-coil domain containing protein 109, C-terminal(IPR006769)	no|down	no|down	yes|down	yes|down	2
MsG0380018022.01	Coiled-coil domain-containing protein 90-like(IPR024461)	no|up	no|up	no|up	yes|up	1
MsG0780040289.01	COMM domain(IPR017920)	no|down	yes|down	no|down	no|down	1
MsG0680032126.01	Concanavalin A-like lectin/glucanase domain superfamily(IPR013320)|Alginate lyase 2(IPR014895)	no|up	yes|up	yes|up	yes|up	3
MsG0380016780.01	Concanavalin A-like lectin/glucanase domain superfamily(IPR013320)|Alginate lyase 2(IPR014895)	no|down	no|down	yes|down	no|down	1
MsG0180002397.01	Condensin subunit 1(IPR007673)|Armadillo-like helical(IPR011989)|Armadillo-type fold(IPR016024)|Condensin complex subunit 1, N-terminal(IPR024324)|Condensin complex subunit 1, C-terminal(IPR032682)	no|down	no|down	no|down	yes|down	1
MsG0880047303.01	Conserved hypothetical protein CHP01589, plant(IPR006476)	no|down	no|down	no|down	yes|down	1
MsG0780041594.01	Copine(IPR010734)	no|down	no|down	no|down	yes|down	1
MsG0780039893.01	Copine(IPR010734)|von Willebrand factor A-like domain superfamily(IPR036465)	yes|up	yes|up	yes|up	yes|up	4
MsG0880044081.01	Copine(IPR010734)|von Willebrand factor A-like domain superfamily(IPR036465)	no|up	yes|down	yes|down	yes|down	3
MsG0280009469.01	Copine(IPR010734)|Zinc finger, RING/FYVE/PHD-type(IPR013083)|von Willebrand factor A-like domain superfamily(IPR036465)	no|up	no|up	yes|up	no|down	1
MsG0880046945.01	Copper amine oxidase(IPR000269)|Copper amine oxidase, catalytic domain(IPR015798)|Copper amine oxidase, N2-terminal(IPR015800)|Copper amine oxidase, N3-terminal(IPR015802)|Copper amine oxidase, N-terminal(IPR016182)|Copper amine oxidase, catalytic domain superfamily(IPR036460)	no|down	no|down	yes|down	yes|down	2
MsG0880046946.01	Copper amine oxidase(IPR000269)|Copper amine oxidase, catalytic domain(IPR015798)|Copper amine oxidase, N2-terminal(IPR015800)|Copper amine oxidase, N3-terminal(IPR015802)|Copper amine oxidase, N-terminal(IPR016182)|Copper amine oxidase, catalytic domain superfamily(IPR036460)	no|up	no|down	yes|down	yes|down	2
MsG0180005623.01	Copper amine oxidase(IPR000269)|Copper amine oxidase, catalytic domain(IPR015798)|Copper amine oxidase, N2-terminal(IPR015800)|Copper amine oxidase, N3-terminal(IPR015802)|Copper amine oxidase, N-terminal(IPR016182)|Copper amine oxidase, catalytic domain superfamily(IPR036460)	no|up	no|down	yes|down	yes|down	2
MsG0380015960.01	Copper amine oxidase, catalytic domain(IPR015798)|Copper amine oxidase, N2-terminal(IPR015800)|Copper amine oxidase, N3-terminal(IPR015802)|Copper amine oxidase, N-terminal(IPR016182)|Copper amine oxidase, catalytic domain superfamily(IPR036460)	no|up	no|up	no|up	yes|up	1
MsG0380018006.01	CRAL-TRIO lipid binding domain(IPR001251)|CRAL/TRIO, N-terminal domain(IPR011074)|CRAL/TRIO, N-terminal domain superfamily(IPR036273)|CRAL-TRIO lipid binding domain superfamily(IPR036865)	no|up	no|down	no|up	yes|down	1
MsG0580024506.01	CRAL-TRIO lipid binding domain(IPR001251)|CRAL/TRIO, N-terminal domain(IPR011074)|CRAL/TRIO, N-terminal domain superfamily(IPR036273)|CRAL-TRIO lipid binding domain superfamily(IPR036865)	no|up	no|down	yes|down	yes|down	2
MsG0480023553.01	CRAL-TRIO lipid binding domain(IPR001251)|CRAL/TRIO, N-terminal domain(IPR011074)|CRAL/TRIO, N-terminal domain superfamily(IPR036273)|CRAL-TRIO lipid binding domain superfamily(IPR036865)	yes|up	no|down	no|down	no|down	1
MsG0480023532.01	CRAL-TRIO lipid binding domain(IPR001251)|CRAL/TRIO, N-terminal domain(IPR011074)|CRAL/TRIO, N-terminal domain superfamily(IPR036273)|GOLD domain superfamily(IPR036598)|CRAL-TRIO lipid binding domain superfamily(IPR036865)	no|up	no|up	no|down	yes|down	1
MsG0380016899.01	CRAL-TRIO lipid binding domain(IPR001251)|CRAL-TRIO lipid binding domain superfamily(IPR036865)	no|up	no|up	no|down	yes|down	1
MsG0180000125.01	CRAL-TRIO lipid binding domain(IPR001251)|Zinc finger, CCHC-type(IPR001878)|CRAL/TRIO, N-terminal domain(IPR011074)|Bifunctional nuclease superfamily(IPR036104)|CRAL/TRIO, N-terminal domain superfamily(IPR036273)|CRAL-TRIO lipid binding domain superfamily(IPR036865)|Zinc finger, CCHC-type superfamily(IPR036875)	no|down	no|down	no|up	yes|down	1
MsG0780039818.01	CRIB domain(IPR000095)	no|down	no|down	yes|down	yes|down	2
MsG0680030725.01	CRIB domain(IPR000095)|CRIB domain superfamily(IPR036936)	no|up	no|up	no|down	yes|down	1
MsG0780041249.01	CRIB domain(IPR000095)|Rho GTPase-activating protein domain(IPR000198)|Rho GTPase activation protein(IPR008936)|CRIB domain superfamily(IPR036936)	no|down	no|down	no|down	yes|down	1
MsG0180004149.01	Cryptochrome/DNA photolyase class 1(IPR002081)|Cryptochrome/DNA photolyase, FAD-binding domain(IPR005101)|Cryptochrome/DNA photolyase class 1, conserved site, C-terminal(IPR018394)|Cryptochrome/DNA photolyase, FAD-binding domain-like superfamily(IPR036134)	no|down	yes|down	no|down	no|down	1
MsG0180001795.01	Cryptochrome/DNA photolyase class 1(IPR002081)|Cryptochrome/DNA photolyase, FAD-binding domain(IPR005101)|DNA photolyase, N-terminal(IPR006050)|Cryptochrome, plant(IPR014134)|Rossmann-like alpha/beta/alpha sandwich fold(IPR014729)|Cryptochrome/DNA photolyase class 1, conserved site, C-terminal(IPR018394)|Cryptochrome/DNA photolyase, FAD-binding domain-like superfamily(IPR036134)|Cryptochrome/phot…	no|down	yes|down	no|down	no|down	1
MsG0480018405.01	Cryptochrome/DNA photolyase, FAD-binding domain(IPR005101)|DNA photolyase, N-terminal(IPR006050)|Rossmann-like alpha/beta/alpha sandwich fold(IPR014729)|Cryptochrome/DNA photolyase, FAD-binding domain-like superfamily(IPR036134)|Cryptochrome/photolyase, N-terminal domain superfamily(IPR036155)	no|down	no|up	yes|up	yes|up	2
MsG0380017532.01	Cryptochrome/DNA photolyase, FAD-binding domain(IPR005101)|DNA photolyase, N-terminal(IPR006050)|Rossmann-like alpha/beta/alpha sandwich fold(IPR014729)|Cryptochrome/DNA photolyase, FAD-binding domain-like superfamily(IPR036134)|Cryptochrome/photolyase, N-terminal domain superfamily(IPR036155)	no|up	no|up	yes|up	yes|up	2
MsG0880045368.01	CTP synthase, N-terminal(IPR017456)|Glutamine amidotransferase(IPR017926)|P-loop containing nucleoside triphosphate hydrolase(IPR027417)|Class I glutamine amidotransferase-like(IPR029062)|CTP synthase GATase domain(IPR033828)	no|down	yes|down	yes|down	yes|down	3
MsG0480021067.01	Ctr copper transporter(IPR007274)	no|down	yes|down	yes|down	yes|down	3
MsG0180001676.01	Cullin, N-terminal(IPR001373)|Cullin homology domain(IPR016158)|Cullin repeat-like-containing domain superfamily(IPR016159)|Cullin protein, neddylation domain(IPR019559)|Cullin homology domain superfamily(IPR036317)|Winged helix-like DNA-binding domain superfamily(IPR036388)|Winged helix DNA-binding domain superfamily(IPR036390)	no|up	yes|up	no|down	yes|up	2
MsG0080048336.01	Cupredoxin(IPR008972)	no|up	no|up	yes|up	no|up	1
MsG0380015529.01	Cupredoxin(IPR008972)|Multicopper oxidase, type 3(IPR011707)|Laccase, first cupredoxin domain(IPR034288)	no|down	no|down	yes|down	yes|down	2
MsG0780041809.01	Cyanobacterial aminoacyl-tRNA synthetase, CAAD domain(IPR025564)	no|down	no|down	yes|down	yes|down	2
MsG0580024209.01	Cyclic nucleotide-binding domain(IPR000595)|AMP-dependent synthetase/ligase(IPR000873)|Ion transport domain(IPR005821)|RmlC-like jelly roll fold(IPR014710)|Cyclic nucleotide-binding-like(IPR018490)|AMP-binding, conserved site(IPR020845)|AMP-binding enzyme, C-terminal domain(IPR025110)	no|up	no|up	no|up	yes|up	1
MsG0680034816.01	Cyclic nucleotide-binding domain(IPR000595)|Ion transport domain(IPR005821)|RmlC-like jelly roll fold(IPR014710)|Cyclic nucleotide-binding-like(IPR018490)	yes|down	no|down	no|up	no|down	1
MsG0280010927.01	Cyclic nucleotide-binding domain(IPR000595)|RmlC-like jelly roll fold(IPR014710)|Cyclic nucleotide-binding-like(IPR018490)	no|down	no|up	no|down	yes|down	1
MsG0780039891.01	Cyclin P/U(IPR012389)|Cyclin PHO80-like(IPR013922)|Cyclin-like superfamily(IPR036915)	no|up	no|up	no|down	yes|down	1
MsG0880041955.01	Cyclin P/U(IPR012389)|Cyclin PHO80-like(IPR013922)|Cyclin-like superfamily(IPR036915)	no|down	no|down	yes|down	yes|down	2
MsG0780040639.01	Cyclin P/U(IPR012389)|Cyclin PHO80-like(IPR013922)|Cyclin-like superfamily(IPR036915)	no|up	yes|up	no|up	no|up	1
MsG0780038022.01	Cyclin P/U(IPR012389)|Cyclin PHO80-like(IPR013922)|Cyclin-like superfamily(IPR036915)	yes|up	yes|up	yes|up	no|up	3
MsG0380017164.01	Cyclin, C-terminal domain(IPR004367)|Cyclin, N-terminal(IPR006671)|Cyclin-like(IPR013763)|Cyclin-like superfamily(IPR036915)	no|down	no|up	no|down	yes|down	1
MsG0280010650.01	Cyclin, C-terminal domain(IPR004367)|Cyclin, N-terminal(IPR006671)|Cyclin-like(IPR013763)|Cyclin-like superfamily(IPR036915)	no|down	no|down	no|down	yes|down	1
MsG0780040364.01	Cyclin, C-terminal domain(IPR004367)|Cyclin, N-terminal(IPR006671)|Cyclin-like(IPR013763)|Stomatal closure-related actin-binding protein, coiled-coil domain(IPR032009)|Stomatal closure-related actin-binding protein, actin-binding domain(IPR032012)|Stomatal closure-related actin-binding protein, fused Ig-PH domain(IPR032015)|Cyclin-like superfamily(IPR036915)	no|down	no|down	no|down	yes|down	1
MsG0180003553.01	Cys/Met metabolism, pyridoxal phosphate-dependent enzyme(IPR000277)|Cystathionine beta-lyase, eukaryotic(IPR006238)|Pyridoxal phosphate-dependent transferase, major domain(IPR015421)|Pyridoxal phosphate-dependent transferase domain 1(IPR015422)|Pyridoxal phosphate-dependent transferase(IPR015424)	no|down	no|up	no|up	yes|up	1
MsG0180003564.01	Cys/Met metabolism, pyridoxal phosphate-dependent enzyme(IPR000277)|Cystathionine beta-lyase, eukaryotic(IPR006238)|Pyridoxal phosphate-dependent transferase, major domain(IPR015421)|Pyridoxal phosphate-dependent transferase domain 1(IPR015422)|Pyridoxal phosphate-dependent transferase(IPR015424)	no|up	yes|up	no|up	yes|up	2
MsG0180003566.01	Cys/Met metabolism, pyridoxal phosphate-dependent enzyme(IPR000277)|Pyridoxal phosphate-dependent transferase domain 1(IPR015422)|Pyridoxal phosphate-dependent transferase(IPR015424)	no|down	no|down	yes|down	yes|down	2
MsG0180004369.01	Cys/Met metabolism, pyridoxal phosphate-dependent enzyme(IPR000277)|Pyridoxal phosphate-dependent transferase, major domain(IPR015421)|Pyridoxal phosphate-dependent transferase domain 1(IPR015422)|Pyridoxal phosphate-dependent transferase(IPR015424)	no|up	no|down	no|down	yes|up	1
MsG0180004244.01	Cys/Met metabolism, pyridoxal phosphate-dependent enzyme(IPR000277)|Pyridoxal phosphate-dependent transferase, major domain(IPR015421)|Pyridoxal phosphate-dependent transferase(IPR015424)	no|down	no|down	no|up	yes|up	1
MsG0280007479.01	Cystatin domain(IPR000010)	yes|up	yes|up	yes|up	yes|up	4
MsG0380016164.01	Cystatin domain(IPR000010)|Proteinase inhibitor I25, cystatin, conserved site(IPR018073)	no|up	yes|up	no|up	no|up	1
MsG0580029583.01	Cystatin domain(IPR000010)|Proteinase inhibitor I25, cystatin, conserved site(IPR018073)	no|up	yes|down	no|down	no|down	1
MsG0480022003.01	Cysteine peptidase, cysteine active site(IPR000169)|Peptidase C1A, papain C-terminal(IPR000668)|Cathepsin propeptide inhibitor domain (I29)(IPR013201)|Cysteine peptidase, asparagine active site(IPR025661)	no|down	no|down	yes|down	yes|down	2
MsG0880045909.01	Cysteine peptidase, cysteine active site(IPR000169)|Peptidase C1A, papain C-terminal(IPR000668)|Cathepsin propeptide inhibitor domain (I29)(IPR013201)|Cysteine peptidase, histidine active site(IPR025660)|Cysteine peptidase, asparagine active site(IPR025661)	no|down	yes|down	yes|down	yes|down	3
MsG0780039711.01	Cysteine synthase/cystathionine beta-synthase, pyridoxal-phosphate attachment site(IPR001216)|Pyridoxal-phosphate dependent enzyme(IPR001926)|Cysteine synthase(IPR005856)|Cysteine synthase CysK(IPR005859)|Tryptophan synthase beta subunit-like PLP-dependent enzyme(IPR036052)	no|up	no|up	yes|up	yes|up	2
MsG0280006552.01	Cysteine-rich secretory protein, allergen V5/Tpx-1-related(IPR001283)|CAP domain(IPR014044)|Allergen V5/Tpx-1-related, conserved site(IPR018244)|Pathogenesis-related protein 1-like, SCP domain(IPR034111)|CAP superfamily(IPR035940)	no|up	no|up	yes|up	no|up	1
MsG0280006550.01	Cysteine-rich secretory protein, allergen V5/Tpx-1-related(IPR001283)|CAP domain(IPR014044)|Allergen V5/Tpx-1-related, conserved site(IPR018244)|Pathogenesis-related protein 1-like, SCP domain(IPR034111)|CAP superfamily(IPR035940)	yes|up	yes|up	yes|up	yes|up	4
MsG0280007934.01	Cysteine-rich secretory protein, allergen V5/Tpx-1-related(IPR001283)|CAP domain(IPR014044)|Allergen V5/Tpx-1-related, conserved site(IPR018244)|Pathogenesis-related protein 1-like, SCP domain(IPR034111)|CAP superfamily(IPR035940)	yes|up	yes|up	yes|up	yes|up	4
MsG0580024885.01	Cysteine-rich secretory protein, allergen V5/Tpx-1-related(IPR001283)|CAP domain(IPR014044)|Pathogenesis-related protein 1-like, SCP domain(IPR034111)|CAP superfamily(IPR035940)	no|up	no|up	no|up	yes|up	1
MsG0880047503.01	Cysteine-rich secretory protein, allergen V5/Tpx-1-related(IPR001283)|Ves allergen(IPR002413)|CAP domain(IPR014044)|Allergen V5/Tpx-1-related, conserved site(IPR018244)|Pathogenesis-related protein 1-like, SCP domain(IPR034111)|CAP superfamily(IPR035940)	no|down	no|up	no|down	yes|down	1
MsG0880047506.01	Cysteine-rich secretory protein, allergen V5/Tpx-1-related(IPR001283)|Ves allergen(IPR002413)|CAP domain(IPR014044)|Allergen V5/Tpx-1-related, conserved site(IPR018244)|Pathogenesis-related protein 1-like, SCP domain(IPR034111)|CAP superfamily(IPR035940)	no|down	no|up	no|up	yes|up	1
MsG0280006626.01	Cysteine-rich secretory protein, allergen V5/Tpx-1-related(IPR001283)|Ves allergen(IPR002413)|GroES-like superfamily(IPR011032)|Alcohol dehydrogenase, C-terminal(IPR013149)|Alcohol dehydrogenase, N-terminal(IPR013154)|CAP domain(IPR014044)|Quinone oxidoreductase PIG3(IPR014189)|Allergen V5/Tpx-1-related, conserved site(IPR018244)|Polyketide synthase, enoylreductase domain(IPR020843)|Pathogenesis-…	yes|up	yes|up	yes|up	yes|up	4
MsG0280008597.01	Cytidine and deoxycytidylate deaminase domain(IPR002125)|APOBEC/CMP deaminase, zinc-binding(IPR016192)|Cytidine deaminase-like(IPR016193)	no|down	yes|down	yes|down	yes|down	3
MsG0880044056.01	Cytidine and deoxycytidylate deaminase domain(IPR002125)|APOBEC/CMP deaminase, zinc-binding(IPR016192)|Cytidine deaminase-like(IPR016193)|Leucine-rich repeat domain superfamily(IPR032675)	no|up	no|up	yes|up	yes|up	2
MsG0180004510.01	Cytidine and deoxycytidylate deaminase domain(IPR002125)|Cytidine deaminase-like(IPR016193)	no|down	no|down	yes|down	yes|down	2
MsG0180004596.01	Cytochrome b245, heavy chain(IPR000778)|EF-hand domain pair(IPR011992)|FAD-binding 8(IPR013112)|Ferric reductase, NAD binding domain(IPR013121)|Ferric reductase transmembrane component-like domain(IPR013130)|NADPH oxidase Respiratory burst(IPR013623)|Riboflavin synthase-like beta-barrel(IPR017938)|EF-Hand 1, calcium-binding site(IPR018247)	no|up	yes|up	yes|up	yes|up	3
MsG0480023541.01	Cytochrome b245, heavy chain(IPR000778)|EF-hand domain pair(IPR011992)|FAD-binding 8(IPR013112)|Ferric reductase, NAD binding domain(IPR013121)|Ferric reductase transmembrane component-like domain(IPR013130)|NADPH oxidase Respiratory burst(IPR013623)|Riboflavin synthase-like beta-barrel(IPR017938)|EF-Hand 1, calcium-binding site(IPR018247)	no|up	no|up	yes|up	yes|up	2
MsG0880043132.01	Cytochrome b245, heavy chain(IPR000778)|FAD-binding 8(IPR013112)|Ferric reductase, NAD binding domain(IPR013121)	yes|down	no|down	yes|down	yes|down	3
MsG0180005455.01	Cytochrome b561/ferric reductase transmembrane(IPR006593)	no|down	yes|down	no|down	no|down	1
MsG0580029825.01	Cytochrome b561/ferric reductase transmembrane(IPR006593)	no|up	no|up	yes|down	no|down	1
MsG0680031574.01	Cytochrome b5-like heme/steroid binding domain superfamily(IPR036400)	no|down	yes|down	no|up	no|up	1
MsG0180000431.01	Cytochrome b5-like heme/steroid binding domain(IPR001199)|Fatty acid desaturase domain(IPR005804)|Fatty acid desaturase(IPR012171)|Cytochrome b5-like heme/steroid binding domain superfamily(IPR036400)	no|down	no|up	no|down	yes|down	1
MsG0080048510.01	Cytochrome P450(IPR001128)|Cytochrome P450 superfamily(IPR036396)	no|down	yes|down	yes|down	yes|down	3
MsG0480021705.01	Cytochrome P450(IPR001128)|Cytochrome P450 superfamily(IPR036396)	no|up	yes|up	yes|up	yes|up	3
MsG0680032052.01	Cytochrome P450(IPR001128)|Cytochrome P450 superfamily(IPR036396)	no|up	no|down	no|down	yes|down	1
MsG0180001205.01	Cytochrome P450(IPR001128)|Cytochrome P450 superfamily(IPR036396)	no|up	no|up	no|up	yes|up	1
MsG0780036642.01	Cytochrome P450(IPR001128)|Cytochrome P450 superfamily(IPR036396)	no|down	no|down	no|down	yes|up	1
MsG0680033235.01	Cytochrome P450(IPR001128)|Cytochrome P450 superfamily(IPR036396)	no|down	yes|down	yes|down	yes|down	3
MsG0780039511.01	Cytochrome P450(IPR001128)|Cytochrome P450 superfamily(IPR036396)	no|up	yes|up	yes|up	yes|up	3
MsG0180000171.01	Cytochrome P450(IPR001128)|Cytochrome P450 superfamily(IPR036396)|Endonuclease/exonuclease/phosphatase superfamily(IPR036691)	no|down	no|down	no|up	yes|up	1
MsG0480022456.01	Cytochrome P450(IPR001128)|Cytochrome P450, E-class, group I(IPR002401)|Armadillo-like helical(IPR011989)|Armadillo-type fold(IPR016024)|Cytochrome P450, conserved site(IPR017972)|Wings apart-like protein(IPR022771)|Cytochrome P450 superfamily(IPR036396)	no|down	no|down	yes|up	yes|up	2
MsG0380014466.01	Cytochrome P450(IPR001128)|Cytochrome P450, E-class, group I(IPR002401)|Cytochrome P450 superfamily(IPR036396)	no|down	yes|down	no|down	yes|down	2
MsG0780039499.01	Cytochrome P450(IPR001128)|Cytochrome P450, E-class, group I(IPR002401)|Cytochrome P450 superfamily(IPR036396)	no|up	yes|up	yes|up	yes|up	3
MsG0380014864.01	Cytochrome P450(IPR001128)|Cytochrome P450, E-class, group I(IPR002401)|Cytochrome P450 superfamily(IPR036396)	no|up	no|down	yes|down	no|down	1
MsG0180003879.01	Cytochrome P450(IPR001128)|Cytochrome P450, E-class, group I(IPR002401)|Cytochrome P450 superfamily(IPR036396)	yes|up	yes|up	yes|up	yes|up	4
MsG0680034370.01	Cytochrome P450(IPR001128)|Cytochrome P450, E-class, group I(IPR002401)|Cytochrome P450 superfamily(IPR036396)	no|up	yes|down	yes|down	yes|down	3
MsG0180003876.01	Cytochrome P450(IPR001128)|Cytochrome P450, E-class, group I(IPR002401)|Cytochrome P450 superfamily(IPR036396)	no|down	no|down	yes|down	no|down	1
MsG0180003874.01	Cytochrome P450(IPR001128)|Cytochrome P450, E-class, group I(IPR002401)|Cytochrome P450 superfamily(IPR036396)	no|down	no|down	yes|down	no|down	1
MsG0580028509.01	Cytochrome P450(IPR001128)|Cytochrome P450, E-class, group I(IPR002401)|Cytochrome P450 superfamily(IPR036396)	no|up	no|up	yes|up	yes|up	2
MsG0480019228.01	Cytochrome P450(IPR001128)|Cytochrome P450, E-class, group I(IPR002401)|Cytochrome P450 superfamily(IPR036396)	no|up	no|up	yes|up	yes|up	2
MsG0880044313.01	Cytochrome P450(IPR001128)|Cytochrome P450, E-class, group I(IPR002401)|Cytochrome P450 superfamily(IPR036396)	no|up	no|down	no|down	yes|up	1
MsG0780040708.01	Cytochrome P450(IPR001128)|Cytochrome P450, E-class, group I(IPR002401)|Cytochrome P450 superfamily(IPR036396)	yes|up	no|up	no|up	no|up	1
MsG0180001203.01	Cytochrome P450(IPR001128)|Cytochrome P450, E-class, group I(IPR002401)|Cytochrome P450 superfamily(IPR036396)	yes|up	no|up	yes|up	no|up	2
MsG0280009521.01	Cytochrome P450(IPR001128)|Cytochrome P450, E-class, group I(IPR002401)|Cytochrome P450, conserved site(IPR017972)|Cytochrome P450 superfamily(IPR036396)	no|up	yes|up	no|up	no|up	1
MsG0380014734.01	Cytochrome P450(IPR001128)|Cytochrome P450, E-class, group I(IPR002401)|Cytochrome P450, conserved site(IPR017972)|Cytochrome P450 superfamily(IPR036396)	no|up	yes|up	yes|up	yes|up	3
MsG0580028497.01	Cytochrome P450(IPR001128)|Cytochrome P450, E-class, group I(IPR002401)|Cytochrome P450, conserved site(IPR017972)|Cytochrome P450 superfamily(IPR036396)	no|up	yes|up	yes|up	yes|up	3
MsG0480021554.01	Cytochrome P450(IPR001128)|Cytochrome P450, E-class, group I(IPR002401)|Cytochrome P450, conserved site(IPR017972)|Cytochrome P450 superfamily(IPR036396)	yes|down	yes|down	yes|down	yes|down	4
MsG0180004744.01	Cytochrome P450(IPR001128)|Cytochrome P450, E-class, group I(IPR002401)|Cytochrome P450, conserved site(IPR017972)|Cytochrome P450 superfamily(IPR036396)	no|up	no|down	yes|up	yes|up	2
MsG0680032431.01	Cytochrome P450(IPR001128)|Cytochrome P450, E-class, group I(IPR002401)|Cytochrome P450, conserved site(IPR017972)|Cytochrome P450 superfamily(IPR036396)	no|up	no|up	yes|up	yes|up	2
MsG0680030465.01	Cytochrome P450(IPR001128)|Cytochrome P450, E-class, group I(IPR002401)|Cytochrome P450, conserved site(IPR017972)|Cytochrome P450 superfamily(IPR036396)	no|down	yes|down	no|down	no|down	1
MsG0780036421.01	Cytochrome P450(IPR001128)|Cytochrome P450, E-class, group I(IPR002401)|Cytochrome P450, conserved site(IPR017972)|Cytochrome P450 superfamily(IPR036396)	no|down	no|down	no|up	yes|up	1
MsG0380014445.01	Cytochrome P450(IPR001128)|Cytochrome P450, E-class, group I(IPR002401)|Cytochrome P450, conserved site(IPR017972)|Cytochrome P450 superfamily(IPR036396)	no|down	no|down	yes|down	yes|down	2
MsG0680033282.01	Cytochrome P450(IPR001128)|Cytochrome P450, E-class, group I(IPR002401)|Cytochrome P450, conserved site(IPR017972)|Cytochrome P450 superfamily(IPR036396)	no|down	no|down	yes|down	no|down	1
MsG0180003453.01	Cytochrome P450(IPR001128)|Cytochrome P450, E-class, group I(IPR002401)|Cytochrome P450, conserved site(IPR017972)|Cytochrome P450 superfamily(IPR036396)	no|up	yes|up	no|up	no|up	1
MsG0280009858.01	Cytochrome P450(IPR001128)|Cytochrome P450, E-class, group I(IPR002401)|Cytochrome P450, conserved site(IPR017972)|Cytochrome P450 superfamily(IPR036396)	no|up	no|up	yes|up	yes|up	2
MsG0780039500.01	Cytochrome P450(IPR001128)|Cytochrome P450, E-class, group I(IPR002401)|Cytochrome P450, conserved site(IPR017972)|Cytochrome P450 superfamily(IPR036396)	no|up	no|up	yes|up	yes|up	2
MsG0680034312.01	Cytochrome P450(IPR001128)|Cytochrome P450, E-class, group I(IPR002401)|Cytochrome P450, conserved site(IPR017972)|Cytochrome P450 superfamily(IPR036396)	no|up	no|down	yes|down	no|down	1
MsG0480019424.01	Cytochrome P450(IPR001128)|Cytochrome P450, E-class, group I(IPR002401)|Cytochrome P450, conserved site(IPR017972)|Cytochrome P450 superfamily(IPR036396)	yes|down	no|down	no|down	yes|down	2
MsG0380015110.01	Cytochrome P450(IPR001128)|Cytochrome P450, E-class, group I(IPR002401)|Cytochrome P450, conserved site(IPR017972)|Cytochrome P450 superfamily(IPR036396)	no|up	no|down	yes|down	no|down	1
MsG0380014450.01	Cytochrome P450(IPR001128)|Cytochrome P450, E-class, group I(IPR002401)|Cytochrome P450, conserved site(IPR017972)|Cytochrome P450 superfamily(IPR036396)	yes|down	no|down	yes|down	yes|down	3
MsG0880045477.01	Cytochrome P450(IPR001128)|Cytochrome P450, E-class, group I(IPR002401)|Cytochrome P450, conserved site(IPR017972)|Cytochrome P450 superfamily(IPR036396)	yes|up	yes|up	yes|up	no|up	3
MsG0880044315.01	Cytochrome P450(IPR001128)|Cytochrome P450, E-class, group I(IPR002401)|Cytochrome P450, conserved site(IPR017972)|Cytochrome P450 superfamily(IPR036396)	no|up	no|down	no|up	yes|up	1
MsG0580028496.01	Cytochrome P450(IPR001128)|Cytochrome P450, E-class, group I(IPR002401)|Cytochrome P450, conserved site(IPR017972)|Cytochrome P450 superfamily(IPR036396)	no|up	no|up	yes|up	yes|up	2
MsG0280009860.01	Cytochrome P450(IPR001128)|Cytochrome P450, E-class, group I(IPR002401)|Cytochrome P450, conserved site(IPR017972)|Cytochrome P450 superfamily(IPR036396)	no|up	yes|down	no|down	no|down	1
MsG0480021864.01	Cytochrome P450(IPR001128)|Cytochrome P450, E-class, group I(IPR002401)|Cytochrome P450, conserved site(IPR017972)|Cytochrome P450 superfamily(IPR036396)	no|up	no|down	yes|down	yes|down	2
MsG0880042956.01	Cytochrome P450(IPR001128)|Cytochrome P450, E-class, group I(IPR002401)|Cytochrome P450, conserved site(IPR017972)|Cytochrome P450 superfamily(IPR036396)	no|up	no|up	no|down	yes|down	1
MsG0580025178.01	Cytochrome P450(IPR001128)|Cytochrome P450, E-class, group I(IPR002401)|Cytochrome P450, conserved site(IPR017972)|Cytochrome P450 superfamily(IPR036396)	no|up	yes|up	no|up	no|up	1
MsG0780037103.01	Cytochrome P450(IPR001128)|Cytochrome P450, E-class, group I(IPR002401)|Cytochrome P450, conserved site(IPR017972)|Cytochrome P450 superfamily(IPR036396)	yes|up	no|up	no|up	no|down	1
MsG0180005328.01	Cytochrome P450(IPR001128)|Cytochrome P450, E-class, group I(IPR002401)|Cytochrome P450, conserved site(IPR017972)|Cytochrome P450 superfamily(IPR036396)	no|up	yes|up	no|up	no|up	1
MsG0380014434.01	Cytochrome P450(IPR001128)|Cytochrome P450, E-class, group I(IPR002401)|Cytochrome P450, conserved site(IPR017972)|Cytochrome P450 superfamily(IPR036396)	no|down	no|down	no|down	yes|down	1
MsG0480022337.01	Cytochrome P450(IPR001128)|Cytochrome P450, E-class, group I(IPR002401)|Cytochrome P450, conserved site(IPR017972)|Cytochrome P450 superfamily(IPR036396)	no|down	yes|down	no|down	yes|down	2
MsG0780039508.01	Cytochrome P450(IPR001128)|Cytochrome P450, E-class, group I(IPR002401)|Cytochrome P450, conserved site(IPR017972)|Cytochrome P450 superfamily(IPR036396)	no|up	yes|up	no|up	no|up	1
MsG0380014446.01	Cytochrome P450(IPR001128)|Cytochrome P450, E-class, group I(IPR002401)|Cytochrome P450, conserved site(IPR017972)|Cytochrome P450 superfamily(IPR036396)	yes|down	no|down	no|down	no|down	1
MsG0480022311.01	Cytochrome P450(IPR001128)|Cytochrome P450, E-class, group I(IPR002401)|Cytochrome P450, conserved site(IPR017972)|Cytochrome P450 superfamily(IPR036396)	no|up	yes|up	yes|up	yes|up	3
MsG0180005984.01	Cytochrome P450(IPR001128)|Cytochrome P450, E-class, group I(IPR002401)|Cytochrome P450, conserved site(IPR017972)|Cytochrome P450 superfamily(IPR036396)	no|up	no|up	yes|up	yes|up	2
MsG0580029937.01	Cytochrome P450(IPR001128)|Cytochrome P450, E-class, group I(IPR002401)|Cytochrome P450, conserved site(IPR017972)|Cytochrome P450 superfamily(IPR036396)	yes|down	no|up	no|up	no|up	1
MsG0380014448.01	Cytochrome P450(IPR001128)|Cytochrome P450, E-class, group I(IPR002401)|Cytochrome P450, conserved site(IPR017972)|Cytochrome P450 superfamily(IPR036396)	no|down	no|down	yes|down	yes|down	2
MsG0180000086.01	Cytochrome P450(IPR001128)|Cytochrome P450, E-class, group I(IPR002401)|Cytochrome P450, conserved site(IPR017972)|Cytochrome P450 superfamily(IPR036396)	no|up	no|down	no|up	yes|up	1
MsG0280009942.01	Cytochrome P450(IPR001128)|Cytochrome P450, E-class, group I(IPR002401)|Cytochrome P450, conserved site(IPR017972)|Cytochrome P450 superfamily(IPR036396)	yes|up	no|down	no|up	no|down	1
MsG0580028510.01	Cytochrome P450(IPR001128)|Cytochrome P450, E-class, group I(IPR002401)|Cytochrome P450, conserved site(IPR017972)|Cytochrome P450 superfamily(IPR036396)	no|down	yes|up	yes|up	yes|up	3
MsG0280009943.01	Cytochrome P450(IPR001128)|Cytochrome P450, E-class, group I(IPR002401)|Cytochrome P450, conserved site(IPR017972)|Cytochrome P450 superfamily(IPR036396)	no|up	yes|up	no|down	yes|down	2
MsG0680032045.01	Cytochrome P450(IPR001128)|Cytochrome P450, E-class, group I(IPR002401)|Cytochrome P450, conserved site(IPR017972)|Cytochrome P450 superfamily(IPR036396)	no|down	no|up	no|down	yes|down	1
MsG0680030648.01	Cytochrome P450(IPR001128)|Cytochrome P450, E-class, group I(IPR002401)|Cytochrome P450, conserved site(IPR017972)|Cytochrome P450 superfamily(IPR036396)	no|up	yes|down	no|down	no|up	1
MsG0380015872.01	Cytochrome P450(IPR001128)|Cytochrome P450, E-class, group I(IPR002401)|Cytochrome P450, conserved site(IPR017972)|Cytochrome P450 superfamily(IPR036396)	no|down	no|down	yes|down	yes|down	2
MsG0180000440.01	Cytochrome P450(IPR001128)|Cytochrome P450, E-class, group I(IPR002401)|Cytochrome P450, conserved site(IPR017972)|Cytochrome P450 superfamily(IPR036396)	no|down	yes|down	no|down	no|down	1
MsG0580029911.01	Cytochrome P450(IPR001128)|Cytochrome P450, E-class, group I(IPR002401)|Cytochrome P450, conserved site(IPR017972)|Cytochrome P450 superfamily(IPR036396)	no|up	no|down	yes|down	yes|down	2
MsG0280008857.01	Cytochrome P450(IPR001128)|Cytochrome P450, E-class, group I(IPR002401)|Cytochrome P450, conserved site(IPR017972)|Cytochrome P450 superfamily(IPR036396)	yes|up	no|up	yes|up	yes|up	3
MsG0580024901.01	Cytochrome P450(IPR001128)|Cytochrome P450, E-class, group I(IPR002401)|Cytochrome P450, conserved site(IPR017972)|Cytochrome P450 superfamily(IPR036396)	no|down	no|down	yes|down	no|down	1
MsG0880044037.01	Cytochrome P450(IPR001128)|Cytochrome P450, E-class, group I(IPR002401)|Cytochrome P450, conserved site(IPR017972)|Cytochrome P450 superfamily(IPR036396)	no|up	yes|up	yes|up	no|up	2
MsG0580025274.01	Cytochrome P450(IPR001128)|Cytochrome P450, E-class, group I(IPR002401)|Cytochrome P450, conserved site(IPR017972)|Cytochrome P450 superfamily(IPR036396)	yes|up	yes|up	no|up	no|up	2
MsG0780036427.01	Cytochrome P450(IPR001128)|Cytochrome P450, E-class, group I(IPR002401)|Cytochrome P450, conserved site(IPR017972)|Cytochrome P450 superfamily(IPR036396)	no|up	no|down	yes|down	yes|down	2
MsG0780036426.01	Cytochrome P450(IPR001128)|Cytochrome P450, E-class, group I(IPR002401)|Cytochrome P450, conserved site(IPR017972)|Cytochrome P450 superfamily(IPR036396)	no|down	no|down	no|up	yes|up	1
MsG0480021867.01	Cytochrome P450(IPR001128)|Cytochrome P450, E-class, group I(IPR002401)|Cytochrome P450, conserved site(IPR017972)|Cytochrome P450 superfamily(IPR036396)	no|up	no|down	yes|down	no|down	1
MsG0680031007.01	Cytochrome P450(IPR001128)|Cytochrome P450, E-class, group I(IPR002401)|Cytochrome P450, conserved site(IPR017972)|Cytochrome P450 superfamily(IPR036396)	no|down	no|down	no|down	yes|down	1
MsG0480020900.01	Cytochrome P450(IPR001128)|Cytochrome P450, E-class, group I(IPR002401)|Cytochrome P450, conserved site(IPR017972)|Cytochrome P450 superfamily(IPR036396)	no|down	no|down	no|down	yes|down	1
MsG0380014464.01	Cytochrome P450(IPR001128)|Cytochrome P450, E-class, group I(IPR002401)|Cytochrome P450, conserved site(IPR017972)|Cytochrome P450 superfamily(IPR036396)	no|down	no|down	yes|down	yes|down	2
MsG0480019229.01	Cytochrome P450(IPR001128)|Cytochrome P450, E-class, group I(IPR002401)|Cytochrome P450, conserved site(IPR017972)|Cytochrome P450 superfamily(IPR036396)	no|down	no|down	no|down	yes|down	1
MsG0480018802.01	Cytochrome P450(IPR001128)|Cytochrome P450, E-class, group I(IPR002401)|Cytochrome P450, conserved site(IPR017972)|Cytochrome P450 superfamily(IPR036396)	no|no test	yes|up	yes|up	no|up	2
MsG0880045930.01	Cytochrome P450(IPR001128)|Cytochrome P450, E-class, group I(IPR002401)|Cytochrome P450, conserved site(IPR017972)|Cytochrome P450 superfamily(IPR036396)	yes|up	yes|up	yes|up	yes|up	4
MsG0380014463.01	Cytochrome P450(IPR001128)|Cytochrome P450, E-class, group I(IPR002401)|Cytochrome P450, conserved site(IPR017972)|Cytochrome P450 superfamily(IPR036396)	no|down	no|down	yes|down	yes|down	2
MsG0380015080.01	Cytochrome P450(IPR001128)|Cytochrome P450, E-class, group I(IPR002401)|Cytochrome P450, conserved site(IPR017972)|Cytochrome P450 superfamily(IPR036396)	no|down	yes|down	yes|down	yes|down	3
MsG0180001531.01	Cytochrome P450(IPR001128)|Cytochrome P450, E-class, group I(IPR002401)|Cytochrome P450, conserved site(IPR017972)|Cytochrome P450 superfamily(IPR036396)	no|up	no|up	no|up	yes|up	1
MsG0680034310.01	Cytochrome P450(IPR001128)|Cytochrome P450, E-class, group I(IPR002401)|Cytochrome P450, conserved site(IPR017972)|Cytochrome P450 superfamily(IPR036396)	no|up	yes|down	yes|down	yes|down	3
MsG0480021551.01	Cytochrome P450(IPR001128)|Cytochrome P450, E-class, group I(IPR002401)|Cytochrome P450, conserved site(IPR017972)|Cytochrome P450 superfamily(IPR036396)	no|up	no|down	no|down	yes|down	1
MsG0580028500.01	Cytochrome P450(IPR001128)|Cytochrome P450, E-class, group I(IPR002401)|Cytochrome P450, conserved site(IPR017972)|Cytochrome P450 superfamily(IPR036396)	no|up	no|up	yes|up	yes|up	2
MsG0880043147.01	Cytochrome P450(IPR001128)|Cytochrome P450, E-class, group I(IPR002401)|Cytochrome P450, conserved site(IPR017972)|Cytochrome P450 superfamily(IPR036396)	yes|up	yes|up	yes|up	yes|up	4
MsG0180000272.01	Cytochrome P450(IPR001128)|Cytochrome P450, E-class, group I(IPR002401)|Cytochrome P450, conserved site(IPR017972)|Cytochrome P450 superfamily(IPR036396)	no|up	yes|up	yes|up	yes|up	3
MsG0480022336.01	Cytochrome P450(IPR001128)|Cytochrome P450, E-class, group I(IPR002401)|Cytochrome P450, conserved site(IPR017972)|Cytochrome P450 superfamily(IPR036396)	no|up	no|up	yes|up	yes|up	2
MsG0680030641.01	Cytochrome P450(IPR001128)|Cytochrome P450, E-class, group I(IPR002401)|Cytochrome P450, conserved site(IPR017972)|Cytochrome P450 superfamily(IPR036396)	yes|up	no|up	yes|up	yes|up	3
MsG0880044007.01	Cytochrome P450(IPR001128)|Cytochrome P450, E-class, group I(IPR002401)|Cytochrome P450, conserved site(IPR017972)|Cytochrome P450 superfamily(IPR036396)	yes|up	yes|up	yes|up	no|up	3
MsG0480019231.01	Cytochrome P450(IPR001128)|Cytochrome P450, E-class, group I(IPR002401)|Cytochrome P450, conserved site(IPR017972)|Cytochrome P450 superfamily(IPR036396)	no|down	no|up	yes|up	yes|up	2
MsG0480019426.01	Cytochrome P450(IPR001128)|Cytochrome P450, E-class, group I(IPR002401)|Cytochrome P450, conserved site(IPR017972)|Cytochrome P450 superfamily(IPR036396)	no|up	yes|up	no|down	yes|down	2
MsG0880042745.01	Cytochrome P450(IPR001128)|Cytochrome P450, E-class, group I(IPR002401)|Cytochrome P450, conserved site(IPR017972)|Cytochrome P450 superfamily(IPR036396)	yes|up	yes|up	yes|up	yes|up	4
MsG0380012295.01	Cytochrome P450(IPR001128)|Cytochrome P450, E-class, group I(IPR002401)|Cytochrome P450, conserved site(IPR017972)|Cytochrome P450 superfamily(IPR036396)	yes|down	yes|down	yes|down	yes|down	4
MsG0280009522.01	Cytochrome P450(IPR001128)|Cytochrome P450, E-class, group I(IPR002401)|Cytochrome P450, conserved site(IPR017972)|Cytochrome P450 superfamily(IPR036396)	no|up	yes|up	no|up	no|down	1
MsG0580024902.01	Cytochrome P450(IPR001128)|Cytochrome P450, E-class, group I(IPR002401)|Cytochrome P450, conserved site(IPR017972)|Cytochrome P450 superfamily(IPR036396)	no|up	yes|down	yes|down	yes|down	3
MsG0480022958.01	Cytochrome P450(IPR001128)|Cytochrome P450, E-class, group I(IPR002401)|Rubber elongation factor(IPR008802)|Cytochrome P450, conserved site(IPR017972)|Cytochrome P450 superfamily(IPR036396)	yes|down	yes|down	yes|down	no|down	3
MsG0180000197.01	Cytochrome P450(IPR001128)|Cytochrome P450, E-class, group IV(IPR002403)|Cytochrome P450 superfamily(IPR036396)	yes|up	yes|up	yes|up	no|up	3
MsG0880047720.01	Cytochrome P450(IPR001128)|Cytochrome P450, E-class, group IV(IPR002403)|Cytochrome P450 superfamily(IPR036396)	no|down	yes|down	yes|down	no|down	2
MsG0280006546.01	Cytochrome P450(IPR001128)|Cytochrome P450, E-class, group IV(IPR002403)|Cytochrome P450, conserved site(IPR017972)|Cytochrome P450 superfamily(IPR036396)	no|up	no|up	yes|up	yes|up	2
MsG0580028023.01	Cytochrome P450(IPR001128)|Cytochrome P450, E-class, group IV(IPR002403)|Cytochrome P450, conserved site(IPR017972)|Cytochrome P450 superfamily(IPR036396)	no|up	yes|up	yes|up	yes|up	3
MsG0380014455.01	Cytochrome P450(IPR001128)|Cytochrome P450, E-class, group IV(IPR002403)|Cytochrome P450, conserved site(IPR017972)|Cytochrome P450 superfamily(IPR036396)	no|down	no|down	yes|down	no|down	1
MsG0180003548.01	Cytokinin riboside 5'-monophosphate phosphoribohydrolase LOG(IPR005269)|LOG family(IPR031100)	no|down	yes|down	no|down	yes|down	2
MsG0280010926.01	Cytokinin riboside 5'-monophosphate phosphoribohydrolase LOG(IPR005269)|LOG family(IPR031100)	no|up	no|down	yes|down	no|down	1
MsG0780039366.01	D-alanine--D-alanine ligase/VANA/B/C, conserved site(IPR000291)|D-alanine--D-alanine ligase, C-terminal(IPR011095)|D-alanine--D-alanine ligase, N-terminal domain(IPR011127)|ATP-grasp fold, subdomain 1(IPR013815)|Pre-ATP-grasp domain superfamily(IPR016185)	no|down	no|up	no|down	yes|down	1
MsG0880045122.01	D-aminoacyl-tRNA deacylase DtdA(IPR007508)|D-aminoacyl-tRNA deacylase, archaea(IPR018033)	no|up	no|up	yes|up	yes|up	2
MsG0080048600.01	DapA-like(IPR002220)|Aldolase-type TIM barrel(IPR013785)	no|up	no|up	no|up	yes|up	1
MsG0880043457.01	DapA-like(IPR002220)|Aldolase-type TIM barrel(IPR013785)|Schiff base-forming aldolase, conserved site(IPR020624)	no|down	yes|down	no|down	no|down	1
MsG0580024087.01	D-arabinono-1,4-lactone oxidase(IPR007173)|L-gulonolactone oxidase, plant(IPR010030)	no|down	no|down	yes|down	no|down	1
MsG0180001277.01	DC1(IPR004146)	no|up	yes|down	yes|down	no|down	2
MsG0080048982.01	DC1(IPR004146)|Thioredoxin-like fold(IPR012336)|Thioredoxin-like superfamily(IPR036249)	no|down	yes|down	yes|down	yes|down	3
MsG0580025279.01	DEAD/DEAH box helicase domain(IPR011545)|P-loop containing nucleoside triphosphate hydrolase(IPR027417)	yes|down	no|down	no|down	no|down	1
MsG0180000056.01	DEAD/DEAH box helicase domain(IPR011545)|P-loop containing nucleoside triphosphate hydrolase(IPR027417)	no|up	yes|down	no|down	no|down	1
MsG0580024307.01	De-etiolated protein 1, Det1(IPR019138)	no|down	yes|down	no|down	no|down	1
MsG0380016843.01	Dehydrogenase, E1 component(IPR001017)|Cation/H+ exchanger(IPR006153)|Thiamin diphosphate-binding fold(IPR029061)	no|down	yes|down	yes|down	no|down	2
MsG0380012956.01	Deoxyuridine triphosphate nucleotidohydrolase(IPR008181)|dUTPase-like(IPR029054)|dUTPase, trimeric(IPR033704)|dUTPase-like superfamily(IPR036157)	no|up	yes|up	no|up	no|up	1
MsG0180001999.01	Dephospho-CoA kinase(IPR001977)|Transcription factor, MADS-box(IPR002100)|Transcription factor, MADS-box superfamily(IPR036879)	yes|down	yes|down	no|up	yes|down	3
MsG0480022169.01	Development/cell death domain(IPR013989)	no|down	no|down	yes|down	no|down	1
MsG0780039297.01	Development/cell death domain(IPR013989)	no|down	yes|down	yes|down	no|down	2
MsG0880046846.01	Diacylglycerol glucosyltransferase, N-terminal(IPR009695)	no|up	yes|up	no|up	no|up	1
MsG0680032923.01	Diacylglycerol kinase, accessory domain(IPR000756)	yes|up	yes|up	yes|up	yes|up	4
MsG0880044570.01	Diacylglycerol kinase, accessory domain(IPR000756)|Diacylglycerol kinase, catalytic domain(IPR001206)|NAD kinase/diacylglycerol kinase-like domain superfamily(IPR016064)|Inorganic polyphosphate/ATP-NAD kinase, N-terminal(IPR017438)	yes|up	yes|up	yes|up	no|up	3
MsG0780041208.01	Dihydroneopterin aldolase(IPR006156)|Dihydroneopterin aldolase/epimerase domain(IPR006157)	no|down	no|down	no|down	yes|down	1
MsG0780040613.01	Dirigent protein(IPR004265)	yes|up	yes|up	yes|up	no|up	3
MsG0880047163.01	Dirigent protein(IPR004265)	no|down	no|up	no|down	yes|down	1
MsG0480020898.01	Dirigent protein(IPR004265)	no|down	no|down	yes|down	yes|down	2
MsG0780036835.01	Dirigent protein(IPR004265)	no|up	no|up	yes|down	yes|down	2
MsG0380012315.01	Dirigent protein(IPR004265)	no|up	no|down	no|down	yes|down	1
MsG0180001940.01	Dirigent protein(IPR004265)	no|up	no|up	yes|down	yes|down	2
MsG0780040614.01	Dirigent protein(IPR004265)	yes|up	yes|up	yes|up	no|up	3
MsG0780040615.01	Dirigent protein(IPR004265)	no|up	no|down	yes|down	yes|down	2
MsG0180001915.01	Dirigent protein(IPR004265)	no|up	no|up	yes|down	yes|down	2
MsG0080048046.01	Dirigent protein(IPR004265)	no|up	no|up	no|up	yes|up	1
MsG0780040611.01	Dirigent protein(IPR004265)	yes|up	yes|up	yes|up	yes|up	4
MsG0480018519.01	Dirigent protein(IPR004265)	no|up	no|up	no|down	yes|down	1
MsG0180001916.01	Dirigent protein(IPR004265)	no|up	no|up	yes|down	yes|down	2
MsG0480021436.01	Dirigent protein(IPR004265)	no|up	yes|up	no|up	no|up	1
MsG0180006174.01	Dirigent protein(IPR004265)	no|down	no|down	yes|down	yes|down	2
MsG0480018517.01	Dirigent protein(IPR004265)	no|down	no|down	no|down	yes|down	1
MsG0480023982.01	Dirigent protein(IPR004265)	no|down	no|down	yes|down	yes|down	2
MsG0080049046.01	Dirigent protein(IPR004265)	no|up	no|up	yes|down	yes|down	2
MsG0480020897.01	Dirigent protein(IPR004265)	no|up	no|up	no|down	yes|down	1
MsG0780040612.01	Dirigent protein(IPR004265)	no|up	no|up	yes|up	no|up	1
MsG0780040610.01	Dirigent protein(IPR004265)	yes|up	yes|up	yes|up	yes|up	4
MsG0680030463.01	D-isomer specific 2-hydroxyacid dehydrogenase, catalytic domain(IPR006139)|D-isomer specific 2-hydroxyacid dehydrogenase, NAD-binding domain(IPR006140)|D-isomer specific 2-hydroxyacid dehydrogenase, NAD-binding domain conserved site 1(IPR029752)|D-isomer specific 2-hydroxyacid dehydrogenase, NAD-binding domain conserved site(IPR029753)|NAD-dependent formate dehydrogenase(IPR033689)|NAD(P)-binding…	no|up	no|up	no|up	yes|up	1
MsG0280009072.01	DNA (cytosine-5)-methyltransferase 1, replication foci domain(IPR022702)	no|up	yes|up	yes|up	no|up	2
MsG0780041078.01	DNA glycosylase(IPR011257)	no|down	yes|down	no|down	no|down	1
MsG0280008466.01	DNA helicase Pif1-like(IPR010285)	no|up	yes|up	yes|up	yes|up	3
MsG0580030137.01	DNA helicase Pif1-like(IPR010285)	no|down	no|down	yes|down	no|down	1
MsG0180003993.01	DNA helicase Pif1-like(IPR010285)|Aspartic peptidase domain superfamily(IPR021109)|P-loop containing nucleoside triphosphate hydrolase(IPR027417)|Xylanase inhibitor, C-terminal(IPR032799)|Xylanase inhibitor, N-terminal(IPR032861)	no|down	no|down	no|down	yes|down	1
MsG0180005545.01	DNA helicase Pif1-like(IPR010285)|Chlorophyll A-B binding protein(IPR022796)|P-loop containing nucleoside triphosphate hydrolase(IPR027417)	no|down	no|up	yes|up	no|up	1
MsG0780038635.01	DNA helicase Pif1-like(IPR010285)|DNA-binding pseudobarrel domain superfamily(IPR015300)|P-loop containing nucleoside triphosphate hydrolase(IPR027417)	no|up	no|up	no|up	yes|up	1
MsG0580024572.01	DNA helicase Pif1-like(IPR010285)|Helitron helicase-like domain(IPR025476)|P-loop containing nucleoside triphosphate hydrolase(IPR027417)	no|up	no|down	yes|up	no|up	1
MsG0580027162.01	DNA helicase Pif1-like(IPR010285)|Helitron helicase-like domain(IPR025476)|P-loop containing nucleoside triphosphate hydrolase(IPR027417)	no|up	yes|up	no|up	yes|up	2
MsG0480021689.01	DNA helicase Pif1-like(IPR010285)|Helitron helicase-like domain(IPR025476)|P-loop containing nucleoside triphosphate hydrolase(IPR027417)	yes|down	no|down	no|down	no|down	1
MsG0180005066.01	DNA helicase Pif1-like(IPR010285)|Nucleic acid-binding, OB-fold(IPR012340)|P-loop containing nucleoside triphosphate hydrolase(IPR027417)	no|down	no|down	no|down	yes|down	1
MsG0880045382.01	DNA helicase Pif1-like(IPR010285)|P-loop containing nucleoside triphosphate hydrolase(IPR027417)	no|down	yes|down	no|down	yes|down	2
MsG0380015135.01	DNA helicase Pif1-like(IPR010285)|P-loop containing nucleoside triphosphate hydrolase(IPR027417)	no|up	no|up	yes|up	yes|up	2
MsG0680033552.01	DNA helicase(IPR003840)|DNA helicase Pif1-like(IPR010285)|Helitron helicase-like domain(IPR025476)|P-loop containing nucleoside triphosphate hydrolase(IPR027417)|Xylose isomerase-like superfamily(IPR036237)	no|down	no|down	no|down	yes|down	1
MsG0680035614.01	DNA helicase(IPR003840)|DNA helicase Pif1-like(IPR010285)|P-loop containing nucleoside triphosphate hydrolase(IPR027417)|Alpha/Beta hydrolase fold(IPR029058)	no|down	no|down	yes|down	yes|down	2
MsG0780039581.01	DNA helicase(IPR003840)|Domain of unknown function DUF223(IPR003871)|DNA helicase Pif1-like(IPR010285)|Nucleic acid-binding, OB-fold(IPR012340)|Replication factor A, C-terminal(IPR013955)|Helitron helicase-like domain(IPR025476)|P-loop containing nucleoside triphosphate hydrolase(IPR027417)	no|up	no|down	yes|down	no|down	1
MsG0380013712.01	DNA helicase(IPR003840)|Domain of unknown function DUF223(IPR003871)|DNA helicase Pif1-like(IPR010285)|Nucleic acid-binding, OB-fold(IPR012340)|Replication factor A, C-terminal(IPR013955)|Helitron helicase-like domain(IPR025476)|P-loop containing nucleoside triphosphate hydrolase(IPR027417)	no|down	yes|up	no|up	yes|up	2
MsG0780040802.01	DNA helicase(IPR003840)|Domain of unknown function DUF223(IPR003871)|DNA helicase Pif1-like(IPR010285)|Nucleic acid-binding, OB-fold(IPR012340)|Replication factor A, C-terminal(IPR013955)|P-loop containing nucleoside triphosphate hydrolase(IPR027417)	no|up	yes|up	yes|up	no|up	2
MsG0480019854.01	DNA helicase(IPR003840)|P-loop containing nucleoside triphosphate hydrolase(IPR027417)	no|up	no|down	yes|up	no|up	1
MsG0380016645.01	DNA helicase(IPR003840)|P-loop containing nucleoside triphosphate hydrolase(IPR027417)	no|down	no|down	yes|down	yes|down	2
MsG0580029994.01	DNA helicase(IPR003840)|Tetrapeptide transporter, OPT1/isp4(IPR004648)|Oligopeptide transporter, OPT superfamily(IPR004813)|DNA helicase Pif1-like(IPR010285)|P-loop containing nucleoside triphosphate hydrolase(IPR027417)	no|down	no|down	no|down	yes|down	1
MsG0580024471.01	DNA photolyase, N-terminal(IPR006050)|DNA photolyase class 2(IPR008148)|Rossmann-like alpha/beta/alpha sandwich fold(IPR014729)|DNA photolyase class 2, conserved site(IPR032673)|Cryptochrome/DNA photolyase, FAD-binding domain-like superfamily(IPR036134)|Cryptochrome/photolyase, N-terminal domain superfamily(IPR036155)	no|up	yes|up	yes|up	yes|up	3
MsG0680034764.01	DNA polymerase alpha/epsilon, subunit B(IPR007185)	yes|up	no|up	no|up	no|up	1
MsG0180005549.01	DNA recombination and repair protein Rad51-like, C-terminal(IPR013632)|P-loop containing nucleoside triphosphate hydrolase(IPR027417)	no|down	no|down	no|up	yes|up	1
MsG0480020226.01	DNA repair metallo-beta-lactamase(IPR011084)|Ribonuclease Z/Hydroxyacylglutathione hydrolase-like(IPR036866)	no|up	yes|up	no|up	no|down	1
MsG0080048353.01	DNA topoisomerase I, DNA binding, eukaryotic-type(IPR008336)|DNA topoisomerase I, DNA binding, N-terminal domain 2(IPR013030)|DNA topoisomerase I, DNA binding, eukaryotic-type, N-terminal domain superfamily(IPR036202)	no|up	no|down	no|down	yes|down	1
MsG0480021350.01	DNA-binding pseudobarrel domain superfamily(IPR015300)	no|down	no|up	no|up	yes|up	1
MsG0280008147.01	DNA-binding pseudobarrel domain superfamily(IPR015300)	yes|down	no|down	no|down	no|down	1
MsG0380012394.01	DNA-directed RNA polymerase III, subunit Rpc31(IPR024661)	no|up	yes|down	no|down	no|down	1
MsG0680030323.01	DNA-directed RNA polymerase Rpb11, 13-16kDa subunit, conserved site(IPR008193)|DNA-directed RNA polymerase, RBP11-like dimerisation domain(IPR009025)|RNA polymerase, RBP11-like subunit(IPR036603)|RNA polymerase RBP11(IPR037685)	no|up	no|up	no|up	yes|up	1
MsG0380017839.01	DNA-directed RNA polymerase, subunit 2, hybrid-binding domain(IPR007120)|RNA polymerase, beta subunit, conserved site(IPR007121)|RNA polymerase Rpb2, domain 7(IPR007641)|RNA polymerase Rpb2, domain 3(IPR007645)|RNA polymerase Rpb2, domain 4(IPR007646)|RNA polymerase Rpb2, domain 5(IPR007647)|DNA-directed RNA polymerase, subunit 2, hybrid-binding domain superfamily(IPR037033)|RNA polymerase Rpb2, …	no|down	yes|down	yes|down	no|down	2
MsG0480021926.01	DnaJ domain(IPR001623)|Chaperone DnaJ, C-terminal(IPR002939)|HSP40/DnaJ peptide-binding(IPR008971)|Chaperone J-domain superfamily(IPR036869)	no|up	no|up	yes|up	yes|up	2
MsG0280006768.01	DnaJ domain(IPR001623)|Chaperone DnaJ, C-terminal(IPR002939)|HSP40/DnaJ peptide-binding(IPR008971)|DnaJ domain, conserved site(IPR018253)|Chaperone J-domain superfamily(IPR036869)	no|up	yes|up	yes|up	yes|up	3
MsG0180000363.01	DnaJ domain(IPR001623)|Chaperone J-domain superfamily(IPR036869)	no|up	no|up	no|up	yes|up	1
MsG0480018213.01	DnaJ domain(IPR001623)|Chaperone J-domain superfamily(IPR036869)	no|down	yes|down	yes|down	yes|down	3
MsG0480022002.01	DnaJ domain(IPR001623)|Chaperone J-domain superfamily(IPR036869)	no|up	yes|up	no|up	no|down	1
MsG0780041408.01	DnaJ domain(IPR001623)|Chaperone J-domain superfamily(IPR036869)	no|down	yes|down	no|down	no|up	1
MsG0280010419.01	DnaJ domain(IPR001623)|Chaperone J-domain superfamily(IPR036869)	no|down	yes|down	no|down	yes|down	2
MsG0180001548.01	DnaJ domain(IPR001623)|Chaperone J-domain superfamily(IPR036869)	no|down	yes|down	yes|down	yes|down	3
MsG0280008755.01	DnaJ domain(IPR001623)|Chaperone J-domain superfamily(IPR036869)	no|down	no|down	yes|down	yes|down	2
MsG0480022631.01	DnaJ domain(IPR001623)|C-type lectin fold(IPR016187)|DnaJ domain, conserved site(IPR018253)|Chaperone J-domain superfamily(IPR036869)	yes|up	yes|up	no|up	no|up	2
MsG0580025102.01	DnaJ domain(IPR001623)|DnaJ domain, conserved site(IPR018253)|Chaperone J-domain superfamily(IPR036869)	no|down	yes|down	no|down	no|up	1
MsG0380014575.01	DnaJ domain(IPR001623)|DnaJ domain, conserved site(IPR018253)|Chaperone J-domain superfamily(IPR036869)	yes|down	no|down	no|down	no|down	1
MsG0280006445.01	DnaJ domain(IPR001623)|DnaJ domain, conserved site(IPR018253)|Chaperone J-domain superfamily(IPR036869)	no|up	no|up	yes|up	yes|up	2
MsG0380014610.01	DnaJ domain(IPR001623)|DnaJ domain, conserved site(IPR018253)|Chaperone J-domain superfamily(IPR036869)	no|up	no|down	no|down	yes|down	1
MsG0480022680.01	DnaJ domain(IPR001623)|DnaJ domain, conserved site(IPR018253)|Chaperone J-domain superfamily(IPR036869)	no|up	no|up	yes|up	no|up	1
MsG0180001044.01	DnaJ domain(IPR001623)|DnaJ domain, conserved site(IPR018253)|DNAJ-containing protein, X-domain(IPR026894)|Chaperone J-domain superfamily(IPR036869)	no|down	no|down	no|down	yes|down	1
MsG0380017158.01	DnaJ domain(IPR001623)|Tetratricopeptide-like helical domain superfamily(IPR011990)|Concanavalin A-like lectin/glucanase domain superfamily(IPR013320)|Chaperone J-domain superfamily(IPR036869)	yes|up	no|up	no|up	no|up	1
MsG0780040920.01	DnaJ domain(IPR001623)|Tetratricopeptide-like helical domain superfamily(IPR011990)|DnaJ domain, conserved site(IPR018253)|Chaperone J-domain superfamily(IPR036869)	no|up	no|up	no|up	yes|up	1
MsG0180003449.01	DnaJ homologue, subfamily C, member 28, conserved domain(IPR018961)	no|down	yes|down	no|down	no|down	1
MsG0780041361.01	Domain of unknown function CP12(IPR003823)	no|down	yes|down	yes|down	no|down	2
MsG0280008958.01	Domain of unknown function DUF223(IPR003871)|DNA helicase Pif1-like(IPR010285)|Nucleic acid-binding, OB-fold(IPR012340)|DNA recombination and repair protein Rad51-like, C-terminal(IPR013632)|Helitron helicase-like domain(IPR025476)|P-loop containing nucleoside triphosphate hydrolase(IPR027417)	yes|up	no|up	no|up	no|up	1
MsG0680035895.01	Domain of unknown function DUF223(IPR003871)|DNA helicase Pif1-like(IPR010285)|Nucleic acid-binding, OB-fold(IPR012340)|Replication factor A, C-terminal(IPR013955)|Helitron helicase-like domain(IPR025476)|P-loop containing nucleoside triphosphate hydrolase(IPR027417)	no|down	yes|down	no|down	yes|down	2
MsG0780037939.01	Domain of unknown function DUF223(IPR003871)|DNA helicase Pif1-like(IPR010285)|Nucleic acid-binding, OB-fold(IPR012340)|Replication factor A, C-terminal(IPR013955)|Kelch-type beta propeller(IPR015915)|P-loop containing nucleoside triphosphate hydrolase(IPR027417)	no|up	no|up	no|up	yes|up	1
MsG0280010312.01	Domain of unknown function DUF223(IPR003871)|Nucleic acid-binding, OB-fold(IPR012340)	no|down	yes|down	no|down	yes|down	2
MsG0880044066.01	Domain of unknown function DUF223(IPR003871)|Nucleic acid-binding, OB-fold(IPR012340)	no|down	yes|down	yes|down	no|down	2
MsG0480020145.01	Domain of unknown function DUF223(IPR003871)|Nucleic acid-binding, OB-fold(IPR012340)	no|up	no|down	yes|up	yes|up	2
MsG0780038830.01	Domain of unknown function DUF223(IPR003871)|Nucleic acid-binding, OB-fold(IPR012340)	no|down	no|down	no|down	yes|down	1
MsG0180000214.01	Domain of unknown function DUF223(IPR003871)|Nucleic acid-binding, OB-fold(IPR012340)	yes|up	no|up	no|up	no|up	1
MsG0580027326.01	Domain of unknown function DUF223(IPR003871)|Nucleic acid-binding, OB-fold(IPR012340)	no|down	yes|down	yes|down	no|down	2
MsG0180001501.01	Domain of unknown function DUF223(IPR003871)|Nucleic acid-binding, OB-fold(IPR012340)|Domain of unknown function DUF4283(IPR025558)	yes|up	yes|up	yes|up	no|up	3
MsG0780038632.01	Domain of unknown function DUF223(IPR003871)|Nucleic acid-binding, OB-fold(IPR012340)|Replication factor A, C-terminal(IPR013955)	no|up	yes|up	yes|up	yes|up	3
MsG0680030467.01	Domain of unknown function DUF223(IPR003871)|Nucleic acid-binding, OB-fold(IPR012340)|Replication factor A, C-terminal(IPR013955)	no|down	yes|down	no|down	no|down	1
MsG0380016100.01	Domain of unknown function DUF223(IPR003871)|Nucleic acid-binding, OB-fold(IPR012340)|Replication factor A, C-terminal(IPR013955)	no|down	no|down	no|down	yes|down	1
MsG0180003580.01	Domain of unknown function DUF223(IPR003871)|Nucleic acid-binding, OB-fold(IPR012340)|Replication factor A, C-terminal(IPR013955)	no|up	no|down	no|up	yes|up	1
MsG0680035893.01	Domain of unknown function DUF223(IPR003871)|Nucleic acid-binding, OB-fold(IPR012340)|Replication factor A, C-terminal(IPR013955)	no|up	no|up	yes|up	no|up	1
MsG0280010244.01	Domain of unknown function DUF3700(IPR024286)|Nucleophile aminohydrolases, N-terminal(IPR029055)	no|down	yes|down	yes|down	yes|down	3
MsG0480022404.01	Domain of unknown function DUF3700(IPR024286)|Nucleophile aminohydrolases, N-terminal(IPR029055)	no|down	no|down	yes|down	yes|down	2
MsG0280006700.01	Domain of unknown function DUF3700(IPR024286)|Nucleophile aminohydrolases, N-terminal(IPR029055)	no|down	yes|down	yes|down	yes|down	3
MsG0880046212.01	Domain of unknown function DUF4005(IPR025064)	no|up	yes|up	no|up	no|up	1
MsG0380017420.01	Domain of unknown function DUF4050(IPR025124)	no|down	yes|down	yes|down	no|down	2
MsG0380016296.01	Domain of unknown function DUF4057(IPR025131)	no|down	no|down	no|down	yes|down	1
MsG0480023323.01	Domain of unknown function DUF4057(IPR025131)	no|down	no|down	no|down	yes|down	1
MsG0280008176.01	Domain of unknown function DUF4283(IPR025558)	no|down	no|up	yes|down	yes|down	2
MsG0280009305.01	Domain of unknown function DUF4283(IPR025558)	no|down	no|down	yes|down	yes|down	2
MsG0780036523.01	Domain of unknown function DUF4283(IPR025558)	yes|down	yes|down	no|down	no|down	2
MsG0280008501.01	Domain of unknown function DUF4283(IPR025558)	no|up	no|down	yes|up	yes|up	2
MsG0580024079.01	Domain of unknown function DUF4283(IPR025558)|Zinc knuckle CX2CX4HX4C(IPR025836)	yes|up	yes|up	no|up	no|up	2
MsG0080048148.01	Domain of unknown function DUF4283(IPR025558)|Zinc knuckle CX2CX4HX4C(IPR025836)	no|up	no|up	no|up	yes|up	1
MsG0380013006.01	Domain of unknown function DUF4283(IPR025558)|Zinc knuckle CX2CX4HX4C(IPR025836)	no|down	no|down	no|down	yes|down	1
MsG0380012824.01	Domain of unknown function DUF4283(IPR025558)|Zinc knuckle CX2CX4HX4C(IPR025836)	no|no test	no|up	yes|up	no|up	1
MsG0880046409.01	Domain of unknown function DUF4283(IPR025558)|Zinc knuckle CX2CX4HX4C(IPR025836)	no|up	no|up	yes|up	no|up	1
MsG0180004109.01	Domain of unknown function DUF4283(IPR025558)|Zinc knuckle CX2CX4HX4C(IPR025836)	yes|up	no|up	no|down	no|up	1
MsG0280007998.01	Domain of unknown function DUF4283(IPR025558)|Zinc knuckle CX2CX4HX4C(IPR025836)|Ribonuclease H superfamily(IPR036397)|Endonuclease/exonuclease/phosphatase superfamily(IPR036691)	no|down	yes|down	yes|down	no|down	2
MsG0180003921.01	Domain of unknown function DUF4378(IPR025486)	no|down	no|down	no|down	yes|down	1
MsG0680030965.01	Domain of unknown function DUF4378(IPR025486)	no|down	no|down	yes|down	yes|down	2
MsG0680030550.01	Domain of unknown function DUF4378(IPR025486)	no|down	no|down	yes|down	yes|down	2
MsG0280007359.01	Domain of unknown function DUF4378(IPR025486)|DUF3741-associated sequence motif(IPR032795)	no|down	no|down	no|down	yes|down	1
MsG0180005513.01	Domain of unknown function DUF4378(IPR025486)|DUF3741-associated sequence motif(IPR032795)	no|down	no|down	yes|down	yes|down	2
MsG0680031353.01	Domain of unknown function DUF4378(IPR025486)|DUF3741-associated sequence motif(IPR032795)	no|up	yes|up	yes|up	no|up	2
MsG0880044877.01	Domain of unknown function DUF569(IPR007679)|Actin-crosslinking(IPR008999)	no|up	yes|up	yes|up	no|up	2
MsG0780036976.01	Domain of unknown function DUF588(IPR006702)	no|up	no|down	yes|down	yes|down	2
MsG0380012818.01	Domain of unknown function DUF642(IPR006946)	no|up	no|up	no|down	yes|down	1
MsG0480019818.01	Domain of unknown function DUF642(IPR006946)|Galactose-binding-like domain superfamily(IPR008979)	yes|down	no|down	yes|down	yes|down	3
MsG0480019817.01	Domain of unknown function DUF642(IPR006946)|Galactose-binding-like domain superfamily(IPR008979)	no|down	no|down	no|down	yes|down	1
MsG0280011369.01	Domain of unknown function DUF642(IPR006946)|Galactose-binding-like domain superfamily(IPR008979)	no|up	yes|up	no|up	no|down	1
MsG0580024538.01	Domain of unknown function DUF828(IPR008546)|Pleckstrin-like, plant(IPR013666)	no|up	yes|up	no|up	no|up	1
MsG0180001704.01	Domain of unknown function DUF828(IPR008546)|Pleckstrin-like, plant(IPR013666)|Chlorophyllase(IPR017395)|Alpha/Beta hydrolase fold(IPR029058)	no|down	no|down	no|down	yes|down	1
MsG0180003768.01	Domain of unknown function DUF861, cupin-3(IPR008579)|RmlC-like cupin domain superfamily(IPR011051)|RmlC-like jelly roll fold(IPR014710)	no|up	yes|down	no|down	no|down	1
MsG0780040726.01	Domain unknown function DUF295(IPR005174)	no|down	yes|down	no|down	no|down	1
MsG0080048741.01	Domain unknown function DUF295(IPR005174)	no|down	no|down	yes|down	no|down	1
MsG0080047994.01	Domain unknown function DUF295(IPR005174)	no|down	yes|down	yes|down	no|down	2
MsG0780039690.01	Domain unknown function DUF295(IPR005174)	no|up	yes|up	no|up	no|up	1
MsG0380013856.01	Domain unknown function DUF295(IPR005174)|F-box-like domain superfamily(IPR036047)	no|down	yes|down	no|down	no|down	1
MsG0780038347.01	DOMON domain(IPR005018)|Cytochrome b561/ferric reductase transmembrane(IPR006593)|Cytochrome b561 and DOMON domain-containing protein(IPR017214)	no|down	no|down	no|down	yes|down	1
MsG0580030101.01	DOMON domain(IPR005018)|Cytochrome b561/ferric reductase transmembrane(IPR006593)|Cytochrome b561 and DOMON domain-containing protein(IPR017214)	no|down	no|down	yes|down	no|down	1
MsG0280007481.01	DOMON domain(IPR005018)|Cytochrome b561/ferric reductase transmembrane(IPR006593)|Cytochrome b561 and DOMON domain-containing protein(IPR017214)	yes|up	yes|up	yes|up	no|up	3
MsG0880042793.01	Dormancy/auxin associated protein(IPR008406)	no|down	yes|down	yes|down	no|down	2
MsG0180004623.01	Dormancy/auxin associated protein(IPR008406)	no|down	yes|down	yes|down	no|down	2
MsG0280006748.01	Dormancy/auxin associated protein(IPR008406)	no|down	yes|down	yes|down	yes|down	3
MsG0780041338.01	Drought induced 19 protein type, zinc-binding domain(IPR008598)	yes|up	yes|up	yes|up	no|up	3
MsG0380016740.01	Dual specificity phosphatase, catalytic domain(IPR000340)|Dual specificity protein phosphatase domain(IPR020422)|Protein-tyrosine phosphatase-like(IPR029021)	no|down	no|up	no|up	yes|up	1
MsG0380016257.01	Dual specificity phosphatase, catalytic domain(IPR000340)|Protein-tyrosine phosphatase, active site(IPR016130)|Dual specificity protein phosphatase domain(IPR020422)|ADF-H/Gelsolin-like domain superfamily(IPR029006)|Protein-tyrosine phosphatase-like(IPR029021)	yes|up	yes|up	yes|up	no|up	3
MsG0480018632.01	DUF3741-associated sequence motif(IPR032795)	no|up	no|up	yes|up	no|up	1
MsG0780037870.01	Dynamin central domain(IPR000375)|Dynamin, GTPase domain(IPR001401)|Dynamin GTPase effector(IPR003130)|Dynamin, GTPase region, conserved site(IPR019762)|Dynamin superfamily(IPR022812)|P-loop containing nucleoside triphosphate hydrolase(IPR027417)	no|down	no|down	yes|down	yes|down	2
MsG0780038143.01	Dynamin central domain(IPR000375)|Dynamin, GTPase domain(IPR001401)|Dynamin GTPase effector(IPR003130)|Dynamin, GTPase region, conserved site(IPR019762)|Dynamin superfamily(IPR022812)|P-loop containing nucleoside triphosphate hydrolase(IPR027417)	no|down	yes|down	yes|down	yes|down	3
MsG0880046072.01	Dynamin central domain(IPR000375)|Dynamin, GTPase domain(IPR001401)|Dynamin GTPase effector(IPR003130)|Expansin, cellulose-binding-like domain(IPR007117)|RlpA-like protein, double-psi beta-barrel domain(IPR009009)|Dynamin, GTPase region, conserved site(IPR019762)|Dynamin superfamily(IPR022812)|P-loop containing nucleoside triphosphate hydrolase(IPR027417)|Expansin, cellulose-binding-like domain s…	no|up	no|up	no|down	yes|up	1
MsG0280011304.01	Dynein light chain, type 1/2(IPR001372)|Dynein light chain superfamily(IPR037177)	no|down	yes|down	no|down	no|up	1
MsG0480020472.01	E2F/DP family, winged-helix DNA-binding domain(IPR003316)|E2F transcription factor, CC-MB domain(IPR032198)|Winged helix-like DNA-binding domain superfamily(IPR036388)|Winged helix DNA-binding domain superfamily(IPR036390)|E2F-DP heterodimerization region(IPR037241)	no|down	yes|down	no|down	no|down	1
MsG0180001095.01	EamA domain(IPR000620)	no|up	no|up	yes|up	yes|up	2
MsG0280006413.01	EamA domain(IPR000620)	no|down	no|down	no|up	yes|up	1
MsG0480022704.01	EamA domain(IPR000620)	yes|down	no|down	no|up	no|up	1
MsG0680030606.01	EamA domain(IPR000620)	no|down	yes|down	no|down	no|down	1
MsG0380015557.01	EamA domain(IPR000620)	no|up	yes|up	no|up	no|up	1
MsG0180000111.01	EamA domain(IPR000620)	no|down	no|down	no|down	yes|down	1
MsG0280006412.01	EamA domain(IPR000620)	no|up	no|up	yes|up	yes|up	2
MsG0380015556.01	EamA domain(IPR000620)	no|down	yes|down	no|down	no|down	1
MsG0480022702.01	EamA domain(IPR000620)	no|up	yes|up	yes|up	yes|up	3
MsG0380017819.01	EamA domain(IPR000620)	no|down	no|down	no|down	yes|down	1
MsG0180002434.01	EamA domain(IPR000620)	no|down	no|up	yes|up	no|up	1
MsG0580025826.01	EamA domain(IPR000620)	no|down	yes|down	no|down	no|down	1
MsG0380016784.01	EamA domain(IPR000620)	no|up	no|up	yes|up	yes|up	2
MsG0380015129.01	EamA domain(IPR000620)	no|down	yes|up	no|up	no|up	1
MsG0880047545.01	EamA domain(IPR000620)	no|up	no|up	no|up	yes|up	1
MsG0680035327.01	EamA domain(IPR000620)	no|down	no|up	yes|up	no|up	1
MsG0880046740.01	Early nodulin 93 ENOD93 protein(IPR005050)	no|up	no|up	yes|up	yes|up	2
MsG0380017694.01	Early nodulin 93 ENOD93 protein(IPR005050)	no|up	no|up	no|up	yes|up	1
MsG0180000844.01	Early nodulin 93 ENOD93 protein(IPR005050)	no|up	yes|up	no|up	no|up	1
MsG0180005443.01	EEIG1/EHBP1 N-terminal domain(IPR019448)	no|down	no|down	yes|down	yes|down	2
MsG0680032604.01	EF hand associated, type-1(IPR013566)|P-loop containing nucleoside triphosphate hydrolase(IPR027417)	no|down	yes|down	no|down	no|up	1
MsG0580028110.01	EF-hand domain pair(IPR011992)|Endonuclease/exonuclease/phosphatase superfamily(IPR036691)	no|down	yes|down	no|down	no|down	1
MsG0780041537.01	EF-hand domain pair(IPR011992)|FAD-binding 8(IPR013112)|Ferric reductase transmembrane component-like domain(IPR013130)|NADPH oxidase Respiratory burst(IPR013623)|Riboflavin synthase-like beta-barrel(IPR017938)|EF-Hand 1, calcium-binding site(IPR018247)	yes|up	yes|up	yes|up	no|up	3
MsG0580025365.01	EF-hand domain(IPR002048)|EF-hand domain pair(IPR011992)|EF-Hand 1, calcium-binding site(IPR018247)	no|down	yes|down	no|down	no|down	1
MsG0280011105.01	EF-hand domain(IPR002048)|EF-hand domain pair(IPR011992)|EF-Hand 1, calcium-binding site(IPR018247)	no|up	yes|up	no|up	no|down	1
MsG0580025278.01	EF-hand domain(IPR002048)|EF-hand domain pair(IPR011992)|EF-Hand 1, calcium-binding site(IPR018247)	no|up	yes|up	yes|up	no|up	2
MsG0380015686.01	EF-hand domain(IPR002048)|EF-hand domain pair(IPR011992)|EF-Hand 1, calcium-binding site(IPR018247)	no|up	yes|up	no|up	no|up	1
MsG0480024016.01	EF-hand domain(IPR002048)|EF-hand domain pair(IPR011992)|EF-Hand 1, calcium-binding site(IPR018247)	yes|up	yes|up	yes|up	yes|up	4
MsG0380017133.01	EF-hand domain(IPR002048)|EF-hand domain pair(IPR011992)|EF-Hand 1, calcium-binding site(IPR018247)	no|down	yes|down	yes|down	yes|down	3
MsG0880044659.01	EF-hand domain(IPR002048)|EF-hand domain pair(IPR011992)|EF-Hand 1, calcium-binding site(IPR018247)	no|up	yes|up	yes|up	no|up	2
MsG0780036982.01	EF-hand domain(IPR002048)|EF-hand domain pair(IPR011992)|EF-Hand 1, calcium-binding site(IPR018247)	yes|up	yes|up	yes|up	no|up	3
MsG0880046234.01	EF-hand domain(IPR002048)|EF-hand domain pair(IPR011992)|EF-Hand 1, calcium-binding site(IPR018247)	yes|up	yes|up	no|up	no|down	2
MsG0280010299.01	EF-hand domain(IPR002048)|EF-hand domain pair(IPR011992)|EF-Hand 1, calcium-binding site(IPR018247)	yes|up	yes|up	yes|up	no|up	3
MsG0580029455.01	EF-hand domain(IPR002048)|EF-hand domain pair(IPR011992)|EF-Hand 1, calcium-binding site(IPR018247)	no|down	yes|down	no|down	no|down	1
MsG0380016102.01	EF-hand domain(IPR002048)|EF-hand domain pair(IPR011992)|EF-Hand 1, calcium-binding site(IPR018247)	no|down	no|up	no|down	yes|down	1
MsG0780041643.01	EF-hand domain(IPR002048)|EF-hand domain pair(IPR011992)|EF-Hand 1, calcium-binding site(IPR018247)	no|up	no|up	yes|up	yes|up	2
MsG0380017134.01	EF-hand domain(IPR002048)|EF-hand domain pair(IPR011992)|EF-Hand 1, calcium-binding site(IPR018247)	no|up	yes|down	no|down	no|down	1
MsG0880046231.01	EF-hand domain(IPR002048)|EF-hand domain pair(IPR011992)|EF-Hand 1, calcium-binding site(IPR018247)	yes|up	yes|up	no|up	no|up	2
MsG0580024829.01	EF-hand domain(IPR002048)|EF-hand domain pair(IPR011992)|EF-Hand 1, calcium-binding site(IPR018247)	no|down	no|up	yes|up	yes|up	2
MsG0880043460.01	EF-hand domain(IPR002048)|EF-hand domain pair(IPR011992)|EF-Hand 1, calcium-binding site(IPR018247)	no|down	yes|down	no|down	no|down	1
MsG0580028980.01	EF-hand domain(IPR002048)|EF-hand domain pair(IPR011992)|EF-Hand 1, calcium-binding site(IPR018247)	no|up	yes|up	no|up	no|down	1
MsG0480020242.01	EF-hand domain(IPR002048)|EF-hand domain pair(IPR011992)|EF-Hand 1, calcium-binding site(IPR018247)	yes|up	yes|up	yes|up	no|up	3
MsG0280010635.01	EF-hand domain(IPR002048)|EF-hand domain pair(IPR011992)|EF-Hand 1, calcium-binding site(IPR018247)	yes|up	yes|up	no|up	no|up	2
MsG0380015289.01	EF-hand domain(IPR002048)|EF-hand domain pair(IPR011992)|EF-Hand 1, calcium-binding site(IPR018247)	yes|up	yes|up	yes|up	no|up	3
MsG0880047171.01	EF-hand domain(IPR002048)|EF-hand domain pair(IPR011992)|EF-Hand 1, calcium-binding site(IPR018247)	no|up	no|up	no|up	yes|up	1
MsG0880046585.01	EF-hand domain(IPR002048)|EF-hand domain pair(IPR011992)|EF-Hand 1, calcium-binding site(IPR018247)	no|up	yes|up	no|up	no|down	1
MsG0880042712.01	EF-hand domain(IPR002048)|EF-hand domain pair(IPR011992)|EF-Hand 1, calcium-binding site(IPR018247)	yes|up	no|up	no|up	no|up	1
MsG0780040406.01	EF-hand domain(IPR002048)|EF-hand domain pair(IPR011992)|EF-Hand 1, calcium-binding site(IPR018247)	no|up	yes|up	no|up	no|up	1
MsG0380017580.01	EF-hand domain(IPR002048)|EF-hand domain pair(IPR011992)|EF-Hand 1, calcium-binding site(IPR018247)	no|up	yes|up	no|up	no|up	1
MsG0780036984.01	EF-hand domain(IPR002048)|EF-hand domain pair(IPR011992)|EF-Hand 1, calcium-binding site(IPR018247)	yes|up	yes|up	yes|up	no|up	3
MsG0880047444.01	EF-hand domain(IPR002048)|EF-hand domain pair(IPR011992)|EF-Hand 1, calcium-binding site(IPR018247)|Glyceraldehyde 3-phosphate dehydrogenase, NAD(P) binding domain(IPR020828)|NAD(P)-binding domain superfamily(IPR036291)	yes|up	yes|up	yes|up	no|up	3
MsG0780038722.01	EF-hand domain(IPR002048)|EF-hand domain pair(IPR011992)|FAD-binding 8(IPR013112)|Ferric reductase, NAD binding domain(IPR013121)|Ferric reductase transmembrane component-like domain(IPR013130)|NADPH oxidase Respiratory burst(IPR013623)|Riboflavin synthase-like beta-barrel(IPR017938)|EF-Hand 1, calcium-binding site(IPR018247)	no|up	yes|down	no|down	no|down	1
MsG0380016925.01	EF-hand domain(IPR002048)|EF-hand domain pair(IPR011992)|FAD-binding 8(IPR013112)|Ferric reductase, NAD binding domain(IPR013121)|Ferric reductase transmembrane component-like domain(IPR013130)|NADPH oxidase Respiratory burst(IPR013623)|Riboflavin synthase-like beta-barrel(IPR017938)|EF-Hand 1, calcium-binding site(IPR018247)	no|down	no|down	yes|down	no|down	1
MsG0180000656.01	EGF-like calcium-binding domain(IPR001881)|EGF-like, conserved site(IPR013032)	yes|down	no|down	yes|down	no|down	2
MsG0180000651.01	EGF-type aspartate/asparagine hydroxylation site(IPR000152)|EGF-like calcium-binding domain(IPR001881)|Protein kinase-like domain superfamily(IPR011009)|Protein kinase, ATP binding site(IPR017441)|EGF-like calcium-binding, conserved site(IPR018097)	no|up	no|up	yes|up	no|up	1
MsG0180000910.01	EGF-type aspartate/asparagine hydroxylation site(IPR000152)|Protein kinase domain(IPR000719)|EGF-like calcium-binding domain(IPR001881)|Serine/threonine-protein kinase, active site(IPR008271)|Protein kinase-like domain superfamily(IPR011009)|Protein kinase, ATP binding site(IPR017441)|EGF-like calcium-binding, conserved site(IPR018097)	yes|up	yes|up	yes|up	no|down	3
MsG0180000649.01	EGF-type aspartate/asparagine hydroxylation site(IPR000152)|Protein kinase domain(IPR000719)|Serine-threonine/tyrosine-protein kinase, catalytic domain(IPR001245)|EGF-like calcium-binding domain(IPR001881)|Serine/threonine-protein kinase, active site(IPR008271)|Protein kinase-like domain superfamily(IPR011009)|Protein kinase, ATP binding site(IPR017441)|EGF-like calcium-binding, conserved site(IP…	no|down	no|down	yes|down	no|down	1
MsG0480022032.01	Electron transfer flavoprotein alpha subunit/FixB(IPR001308)|Rossmann-like alpha/beta/alpha sandwich fold(IPR014729)|Electron transfer flavoprotein, alpha/beta-subunit, N-terminal(IPR014730)|Electron transfer flavoprotein, alpha subunit, C-terminal(IPR014731)|Electron transfer flavoprotein subunit alpha, conserved site(IPR018206)|DHS-like NAD/FAD-binding domain superfamily(IPR029035)|Electron tra…	no|down	yes|down	no|down	no|down	1
MsG0480020068.01	ELMO domain(IPR006816)	no|down	no|up	no|up	yes|up	1
MsG0780038713.01	Embryo-specific ATS3(IPR010417)|PLAT/LH2 domain superfamily(IPR036392)	no|up	no|down	yes|down	yes|down	2
MsG0680031131.01	Endo-1,3(4)-beta-glucanase(IPR005200)	no|down	no|down	yes|down	yes|down	2
MsG0680031139.01	Endo-1,3(4)-beta-glucanase(IPR005200)	no|up	no|down	yes|up	yes|up	2
MsG0680032111.01	Endo-1,3(4)-beta-glucanase(IPR005200)|Protein BYPASS-related(IPR008511)	no|up	yes|up	no|up	no|down	1
MsG0280007907.01	Endonuclease/exonuclease/phosphatase superfamily(IPR036691)	yes|up	yes|up	no|up	yes|up	3
MsG0480023299.01	Enhancer of polycomb-like, N-terminal(IPR019542)	yes|up	no|up	no|up	no|up	1
MsG0480023248.01	ENTH/VHS(IPR008942)|AP180 N-terminal homology (ANTH) domain(IPR011417)	no|down	no|down	yes|down	yes|down	2
MsG0880046800.01	ENTH/VHS(IPR008942)|AP180 N-terminal homology (ANTH) domain(IPR011417)|Phosphoinositide-binding clathrin adaptor, domain 2(IPR014712)	yes|up	yes|up	yes|up	no|up	3
MsG0280006423.01	ENTH/VHS(IPR008942)|Haem peroxidase(IPR010255)|AP180 N-terminal homology (ANTH) domain(IPR011417)|ENTH domain(IPR013809)|Phosphoinositide-binding clathrin adaptor, domain 2(IPR014712)	no|up	no|up	yes|up	yes|up	2
MsG0880046788.01	Equilibrative nucleoside transporter(IPR002259)	no|up	no|up	yes|up	yes|up	2
MsG0380017856.01	ER lumen protein retaining receptor(IPR000133)	no|up	no|up	no|up	yes|up	1
MsG0380015861.01	Ethylene insensitive 3-like protein, DNA-binding domain superfamily(IPR023278)	no|down	yes|down	no|down	no|down	1
MsG0580026496.01	Ethylene-responsive binding factor-associated repression(IPR012463)|Jas TPL-binding domain(IPR032308)|Putative nuclear localisation signal(IPR032310)	no|down	yes|up	no|down	no|down	1
MsG0580025421.01	Eukaryotic rRNA processing(IPR008610)	no|down	yes|up	no|up	no|up	1
MsG0280011001.01	Exocyst complex component Exo70(IPR004140)|Cullin repeat-like-containing domain superfamily(IPR016159)	no|up	yes|up	no|up	no|up	1
MsG0180002376.01	Exocyst complex component Exo70(IPR004140)|Cullin repeat-like-containing domain superfamily(IPR016159)	yes|up	yes|up	yes|up	no|up	3
MsG0280010989.01	Exocyst complex component Exo70(IPR004140)|Cullin repeat-like-containing domain superfamily(IPR016159)	no|up	yes|up	yes|up	no|up	2
MsG0580028526.01	Exocyst complex component Exo70(IPR004140)|Cullin repeat-like-containing domain superfamily(IPR016159)	yes|up	yes|up	no|up	no|up	2
MsG0180002594.01	Exocyst complex component Exo70(IPR004140)|Cullin repeat-like-containing domain superfamily(IPR016159)	yes|up	yes|up	yes|up	no|down	3
MsG0580028540.01	Exocyst complex component Exo70(IPR004140)|Cullin repeat-like-containing domain superfamily(IPR016159)	no|up	yes|up	no|up	no|down	1
MsG0580028552.01	Exocyst complex component Exo70(IPR004140)|Cullin repeat-like-containing domain superfamily(IPR016159)	yes|down	no|up	no|down	yes|down	2
MsG0180005857.01	Exonuclease V(IPR019190)	yes|up	yes|up	yes|up	yes|up	4
MsG0180005018.01	Exostosin , C-terminal(IPR015338)|Glycosyl hydrolase, five-bladed beta-propellor domain superfamily(IPR023296)|Nucleotide-diphospho-sugar transferases(IPR029044)	yes|up	yes|up	yes|up	yes|up	4
MsG0180003778.01	Exostosin-like(IPR004263)	no|up	yes|up	yes|up	no|up	2
MsG0880046829.01	Exostosin-like(IPR004263)	no|down	no|down	yes|down	no|down	1
MsG0580029071.01	Exostosin-like(IPR004263)	no|down	no|down	yes|down	no|down	1
MsG0180001358.01	Exostosin-like(IPR004263)	no|up	yes|up	no|up	no|up	1
MsG0280011033.01	Expansin(IPR002963)|Expansin, cellulose-binding-like domain(IPR007117)|Expansin, cellulose-binding-like domain superfamily(IPR036749)	no|down	no|down	yes|down	yes|down	2
MsG0480020965.01	Expansin(IPR002963)|Expansin/pollen allergen, DPBB domain(IPR007112)|Expansin, cellulose-binding-like domain(IPR007117)|Expansin/Lol pI(IPR007118)|RlpA-like protein, double-psi beta-barrel domain(IPR009009)|Expansin, cellulose-binding-like domain superfamily(IPR036749)|RlpA-like domain superfamily(IPR036908)	no|up	no|up	no|down	yes|down	1
MsG0780036297.01	Expansin(IPR002963)|Expansin/pollen allergen, DPBB domain(IPR007112)|Expansin, cellulose-binding-like domain(IPR007117)|Expansin/Lol pI(IPR007118)|RlpA-like protein, double-psi beta-barrel domain(IPR009009)|Expansin, cellulose-binding-like domain superfamily(IPR036749)|RlpA-like domain superfamily(IPR036908)	no|down	no|up	no|down	yes|down	1
MsG0380014966.01	Expansin(IPR002963)|Expansin/pollen allergen, DPBB domain(IPR007112)|Expansin, cellulose-binding-like domain(IPR007117)|Expansin/Lol pI(IPR007118)|RlpA-like protein, double-psi beta-barrel domain(IPR009009)|Expansin, cellulose-binding-like domain superfamily(IPR036749)|RlpA-like domain superfamily(IPR036908)	yes|down	no|down	no|up	yes|up	2
MsG0380014967.01	Expansin(IPR002963)|Expansin/pollen allergen, DPBB domain(IPR007112)|Expansin, cellulose-binding-like domain(IPR007117)|Expansin/Lol pI(IPR007118)|RlpA-like protein, double-psi beta-barrel domain(IPR009009)|Expansin, cellulose-binding-like domain superfamily(IPR036749)|RlpA-like domain superfamily(IPR036908)	no|down	no|down	yes|up	yes|up	2
MsG0580026206.01	Expansin(IPR002963)|Expansin/pollen allergen, DPBB domain(IPR007112)|Expansin, cellulose-binding-like domain(IPR007117)|Expansin/Lol pI(IPR007118)|RlpA-like protein, double-psi beta-barrel domain(IPR009009)|Expansin, cellulose-binding-like domain superfamily(IPR036749)|RlpA-like domain superfamily(IPR036908)	no|down	yes|up	no|up	no|up	1
MsG0480021013.01	Expansin(IPR002963)|Expansin/pollen allergen, DPBB domain(IPR007112)|Expansin, cellulose-binding-like domain(IPR007117)|Expansin/Lol pI(IPR007118)|RlpA-like protein, double-psi beta-barrel domain(IPR009009)|Expansin, cellulose-binding-like domain superfamily(IPR036749)|RlpA-like domain superfamily(IPR036908)	no|up	no|up	no|down	yes|down	1
MsG0580029010.01	Expansin(IPR002963)|Expansin/pollen allergen, DPBB domain(IPR007112)|Expansin, cellulose-binding-like domain(IPR007117)|Expansin/Lol pI(IPR007118)|RlpA-like protein, double-psi beta-barrel domain(IPR009009)|Expansin, cellulose-binding-like domain superfamily(IPR036749)|RlpA-like domain superfamily(IPR036908)	no|down	no|down	yes|up	yes|up	2
MsG0580024441.01	Expansin(IPR002963)|Expansin/pollen allergen, DPBB domain(IPR007112)|Expansin, cellulose-binding-like domain(IPR007117)|Expansin/Lol pI(IPR007118)|RlpA-like protein, double-psi beta-barrel domain(IPR009009)|Expansin, cellulose-binding-like domain superfamily(IPR036749)|RlpA-like domain superfamily(IPR036908)	no|down	no|down	yes|up	no|up	1
MsG0180000028.01	Expansin(IPR002963)|Expansin/pollen allergen, DPBB domain(IPR007112)|Expansin, cellulose-binding-like domain(IPR007117)|Expansin/Lol pI(IPR007118)|RlpA-like protein, double-psi beta-barrel domain(IPR009009)|Expansin, cellulose-binding-like domain superfamily(IPR036749)|RlpA-like domain superfamily(IPR036908)	no|down	no|down	yes|down	yes|down	2
MsG0480022076.01	Expansin(IPR002963)|Expansin/pollen allergen, DPBB domain(IPR007112)|Expansin/Lol pI(IPR007118)|RlpA-like protein, double-psi beta-barrel domain(IPR009009)|RlpA-like domain superfamily(IPR036908)	no|down	no|down	no|down	yes|down	1
MsG0780041436.01	Expansin(IPR002963)|Nucleotidyl transferase domain(IPR005835)|ADP-glucose pyrophosphorylase, conserved site(IPR005836)|Expansin/pollen allergen, DPBB domain(IPR007112)|Expansin, cellulose-binding-like domain(IPR007117)|Expansin/Lol pI(IPR007118)|RlpA-like protein, double-psi beta-barrel domain(IPR009009)|Trimeric LpxA-like superfamily(IPR011004)|Nucleotide-diphospho-sugar transferases(IPR029044)|…	yes|down	yes|down	yes|down	yes|down	4
MsG0580024583.01	Expansin, cellulose-binding-like domain(IPR007117)|RlpA-like protein, double-psi beta-barrel domain(IPR009009)|Expansin, cellulose-binding-like domain superfamily(IPR036749)|RlpA-like domain superfamily(IPR036908)	no|up	no|down	no|up	yes|up	1
MsG0080048506.01	Extensin domain(IPR006706)	no|up	no|down	no|down	yes|down	1
MsG0180005143.01	Extensin domain(IPR006706)	no|up	yes|up	yes|up	yes|up	3
MsG0480021063.01	Extensin domain(IPR006706)	no|down	no|down	yes|down	yes|down	2
MsG0180005130.01	Extensin domain(IPR006706)	yes|up	yes|up	yes|up	yes|up	4
MsG0680034286.01	Extradiol ring-cleavage dioxygenase, class III enzyme, subunit B(IPR004183)|Extradiol aromatic ring-opening dioxygenase, DODA-type(IPR014436)	no|down	no|down	yes|down	no|down	1
MsG0380017554.01	FAD dependent oxidoreductase(IPR006076)|FAD/NAD(P)-binding domain superfamily(IPR036188)	no|down	yes|down	yes|down	no|up	2
MsG0480022736.01	FAD linked oxidase, N-terminal(IPR006094)|Berberine/berberine-like(IPR012951)|FAD-binding, type 2, subdomain 1(IPR016167)|FAD-binding, type 2-like superfamily(IPR036318)	no|down	no|down	yes|down	yes|down	2
MsG0480022735.01	FAD linked oxidase, N-terminal(IPR006094)|Berberine/berberine-like(IPR012951)|FAD-binding, type 2, subdomain 1(IPR016167)|FAD-binding, type 2-like superfamily(IPR036318)	no|down	no|down	no|down	yes|down	1
MsG0480022734.01	FAD linked oxidase, N-terminal(IPR006094)|Berberine/berberine-like(IPR012951)|FAD-binding, type 2, subdomain 1(IPR016167)|FAD-binding, type 2-like superfamily(IPR036318)	no|down	no|down	no|down	yes|down	1
MsG0480022738.01	FAD linked oxidase, N-terminal(IPR006094)|Berberine/berberine-like(IPR012951)|FAD-binding, type 2, subdomain 1(IPR016167)|FAD-binding, type 2-like superfamily(IPR036318)	no|up	no|up	yes|down	yes|down	2
MsG0280007749.01	FAD linked oxidase, N-terminal(IPR006094)|Berberine/berberine-like(IPR012951)|FAD-binding, type 2-like superfamily(IPR036318)	no|up	yes|up	yes|up	no|up	2
MsG0880042930.01	FAD linked oxidase, N-terminal(IPR006094)|D-arabinono-1,4-lactone oxidase(IPR007173)|L-gulonolactone oxidase, plant(IPR010030)|FAD-binding, type 2, subdomain 1(IPR016167)|FAD-binding, type 2-like superfamily(IPR036318)	no|down	no|down	yes|down	yes|down	2
MsG0480021486.01	FAD linked oxidase, N-terminal(IPR006094)|FAD-binding, type 2-like superfamily(IPR036318)	no|down	no|down	yes|down	yes|down	2
MsG0880042909.01	FAD linked oxidase, N-terminal(IPR006094)|FAD-binding, type 2-like superfamily(IPR036318)	no|up	no|down	yes|down	yes|down	2
MsG0280006608.01	FAD/NAD(P)-binding domain(IPR023753)|FAD/NAD(P)-binding domain superfamily(IPR036188)	no|up	no|up	yes|up	yes|up	2
MsG0480022486.01	FAD/NAD(P)-binding domain(IPR023753)|FAD/NAD(P)-binding domain superfamily(IPR036188)	yes|up	yes|up	no|up	no|up	2
MsG0480020445.01	FAD/NAD(P)-binding domain(IPR023753)|FAD/NAD(P)-binding domain superfamily(IPR036188)	yes|up	no|up	yes|up	yes|up	3
MsG0880043129.01	FAD-binding 8(IPR013112)|Ferric reductase, NAD binding domain(IPR013121)|Ferric reductase transmembrane component-like domain(IPR013130)	yes|down	no|up	yes|down	no|down	2
MsG0880043130.01	FAD-binding 8(IPR013112)|Ferric reductase, NAD binding domain(IPR013121)|Ferric reductase transmembrane component-like domain(IPR013130)	yes|down	no|up	yes|down	no|down	2
MsG0880043123.01	FAD-binding 8(IPR013112)|Ferric reductase, NAD binding domain(IPR013121)|Ferric reductase transmembrane component-like domain(IPR013130)	yes|down	no|down	yes|down	no|down	2
MsG0180004974.01	FAD-binding domain(IPR002938)|FAD/NAD(P)-binding domain superfamily(IPR036188)	no|down	no|down	yes|down	no|down	1
MsG0580024567.01	FAD-binding domain(IPR002938)|FAD/NAD(P)-binding domain superfamily(IPR036188)	no|up	no|up	yes|up	yes|up	2
MsG0880043365.01	FAR1 DNA binding domain(IPR004330)	no|up	no|up	yes|up	no|up	1
MsG0380017078.01	FAR1 DNA binding domain(IPR004330)	no|up	no|up	no|up	yes|up	1
MsG0680032777.01	FAR1 DNA binding domain(IPR004330)	yes|down	yes|down	no|down	no|down	2
MsG0480023350.01	FAS1 domain superfamily(IPR036378)	no|up	yes|up	no|up	no|up	1
MsG0280010793.01	FAS1 domain(IPR000782)|FAS1 domain superfamily(IPR036378)	no|up	no|up	yes|down	no|down	1
MsG0780040921.01	FAS1 domain(IPR000782)|FAS1 domain superfamily(IPR036378)	no|up	no|up	yes|down	yes|down	2
MsG0280010894.01	FAS1 domain(IPR000782)|FAS1 domain superfamily(IPR036378)	no|up	no|up	yes|down	yes|down	2
MsG0780039515.01	FAS1 domain(IPR000782)|FAS1 domain superfamily(IPR036378)	no|up	no|up	yes|down	yes|down	2
MsG0580030141.01	FAS1 domain(IPR000782)|FAS1 domain superfamily(IPR036378)	no|down	no|up	no|down	yes|down	1
MsG0780039248.01	Fatty acid desaturase domain(IPR005804)|Fatty acid desaturase, N-terminal(IPR021863)	yes|up	yes|up	yes|up	no|up	3
MsG0380017488.01	FBD domain(IPR006566)	no|up	no|up	no|up	yes|up	1
MsG0880042381.01	FBD domain(IPR006566)|Leucine-rich repeat domain superfamily(IPR032675)	no|down	no|down	no|down	yes|down	1
MsG0280007131.01	F-box associated domain, type 1(IPR006527)|F-box associated interaction domain(IPR017451)	no|up	yes|up	no|up	yes|up	2
MsG0380012422.01	F-box associated domain, type 1(IPR006527)|F-box associated interaction domain(IPR017451)	no|down	no|down	yes|down	no|down	1
MsG0880044008.01	F-box associated domain, type 1(IPR006527)|F-box associated interaction domain(IPR017451)|F-box-like domain superfamily(IPR036047)	no|up	yes|up	no|up	no|down	1
MsG0680031211.01	F-box associated domain, type 1(IPR006527)|F-box associated interaction domain(IPR017451)|WIYLD domain(IPR018848)|F-box-like domain superfamily(IPR036047)	no|up	no|up	no|up	yes|up	1
MsG0380012744.01	F-box associated interaction domain(IPR017451)	no|down	yes|down	yes|down	yes|down	3
MsG0880046935.01	F-box associated interaction domain(IPR017451)	no|down	yes|down	no|down	no|down	1
MsG0580026620.01	F-box associated interaction domain(IPR017451)	no|up	yes|up	yes|up	no|up	2
MsG0780037813.01	F-box associated interaction domain(IPR017451)	no|up	yes|up	no|up	no|down	1
MsG0580030102.01	F-box associated interaction domain(IPR017451)|F-box-like domain superfamily(IPR036047)	yes|down	yes|down	yes|down	yes|down	4
MsG0880043370.01	F-box associated interaction domain(IPR017451)|F-box-like domain superfamily(IPR036047)	no|down	yes|down	yes|down	yes|down	3
MsG0280010790.01	F-box associated interaction domain(IPR017451)|F-box-like domain superfamily(IPR036047)	yes|down	yes|down	yes|down	yes|down	4
MsG0880042597.01	F-box associated interaction domain(IPR017451)|Leucine-rich repeat domain superfamily(IPR032675)|F-box-like domain superfamily(IPR036047)	yes|up	no|up	no|up	no|up	1
MsG0880045386.01	F-box domain(IPR001810)|Actin family(IPR004000)|F-box-like domain superfamily(IPR036047)|Ribonuclease H superfamily(IPR036397)	no|down	no|down	no|down	yes|down	1
MsG0680031059.01	F-box domain(IPR001810)|Amino acid transporter, transmembrane domain(IPR013057)|F-box associated interaction domain(IPR017451)|F-box-like domain superfamily(IPR036047)	no|down	no|down	yes|down	no|down	1
MsG0380012694.01	F-box domain(IPR001810)|Domain unknown function DUF295(IPR005174)|F-box-like domain superfamily(IPR036047)	no|down	yes|down	no|down	no|down	1
MsG0180002524.01	F-box domain(IPR001810)|Domain unknown function DUF295(IPR005174)|F-box-like domain superfamily(IPR036047)	no|down	yes|down	no|down	no|down	1
MsG0780040728.01	F-box domain(IPR001810)|Domain unknown function DUF295(IPR005174)|F-box-like domain superfamily(IPR036047)	no|no test	no|up	no|up	yes|up	1
MsG0880045590.01	F-box domain(IPR001810)|Domain unknown function DUF295(IPR005174)|F-box-like domain superfamily(IPR036047)	yes|up	yes|up	yes|up	no|up	3
MsG0580027295.01	F-box domain(IPR001810)|FBD domain(IPR006566)|F-box-like domain superfamily(IPR036047)	no|down	no|down	yes|up	no|down	1
MsG0180005047.01	F-box domain(IPR001810)|FBD domain(IPR006566)|F-box-like domain superfamily(IPR036047)	no|down	yes|down	no|up	no|down	1
MsG0780037380.01	F-box domain(IPR001810)|FBD domain(IPR006566)|Leucine-rich repeat 2(IPR013101)|Leucine-rich repeat domain superfamily(IPR032675)|F-box-like domain superfamily(IPR036047)	no|up	no|up	no|up	yes|up	1
MsG0580026109.01	F-box domain(IPR001810)|FBD domain(IPR006566)|Leucine-rich repeat 2(IPR013101)|Leucine-rich repeat domain superfamily(IPR032675)|F-box-like domain superfamily(IPR036047)	no|up	yes|up	no|up	no|up	1
MsG0280009792.01	F-box domain(IPR001810)|FBD domain(IPR006566)|Leucine-rich repeat domain superfamily(IPR032675)|F-box-like domain superfamily(IPR036047)	no|up	no|up	no|up	yes|up	1
MsG0780036864.01	F-box domain(IPR001810)|FBD domain(IPR006566)|Leucine-rich repeat domain superfamily(IPR032675)|F-box-like domain superfamily(IPR036047)	no|up	yes|down	no|down	no|down	1
MsG0380012717.01	F-box domain(IPR001810)|F-box associated domain, type 1(IPR006527)|F-box associated interaction domain(IPR017451)|F-box-like domain superfamily(IPR036047)	yes|down	yes|down	yes|down	no|down	3
MsG0880046951.01	F-box domain(IPR001810)|F-box associated domain, type 1(IPR006527)|Galactose oxidase/kelch, beta-propeller(IPR011043)|F-box associated interaction domain(IPR017451)|F-box-like domain superfamily(IPR036047)	no|down	no|down	yes|down	no|down	1
MsG0880046614.01	F-box domain(IPR001810)|F-box associated domain, type 1(IPR006527)|Galactose oxidase/kelch, beta-propeller(IPR011043)|F-box associated interaction domain(IPR017451)|F-box-like domain superfamily(IPR036047)	no|down	yes|down	no|down	no|down	1
MsG0680030683.01	F-box domain(IPR001810)|F-box associated interaction domain(IPR017451)|Alpha/Beta hydrolase fold(IPR029058)|F-box-like domain superfamily(IPR036047)	no|up	no|up	yes|up	no|up	1
MsG0680031643.01	F-box domain(IPR001810)|F-box associated interaction domain(IPR017451)|F-box-like domain superfamily(IPR036047)	no|down	yes|down	no|down	no|down	1
MsG0780037848.01	F-box domain(IPR001810)|F-box associated interaction domain(IPR017451)|F-box-like domain superfamily(IPR036047)	no|down	yes|down	yes|down	no|down	2
MsG0680031654.01	F-box domain(IPR001810)|F-box associated interaction domain(IPR017451)|F-box-like domain superfamily(IPR036047)	no|down	yes|down	yes|down	no|down	2
MsG0480018435.01	F-box domain(IPR001810)|F-box associated interaction domain(IPR017451)|F-box-like domain superfamily(IPR036047)	no|down	yes|down	yes|down	yes|down	3
MsG0380012105.01	F-box domain(IPR001810)|F-box associated interaction domain(IPR017451)|F-box-like domain superfamily(IPR036047)	no|up	no|up	yes|up	no|up	1
MsG0380011543.01	F-box domain(IPR001810)|F-box associated interaction domain(IPR017451)|F-box-like domain superfamily(IPR036047)	no|down	no|down	yes|down	no|down	1
MsG0480018561.01	F-box domain(IPR001810)|F-box associated interaction domain(IPR017451)|F-box-like domain superfamily(IPR036047)	no|down	yes|down	yes|down	yes|down	3
MsG0380012769.01	F-box domain(IPR001810)|F-box associated interaction domain(IPR017451)|F-box-like domain superfamily(IPR036047)	no|down	yes|down	yes|down	yes|down	3
MsG0280007124.01	F-box domain(IPR001810)|F-box associated interaction domain(IPR017451)|Leucine-rich repeat domain superfamily(IPR032675)|F-box-like domain superfamily(IPR036047)	yes|down	yes|down	yes|down	no|down	3
MsG0480023490.01	F-box domain(IPR001810)|F-box-like domain superfamily(IPR036047)	no|up	yes|up	no|down	no|down	1
MsG0780040450.01	F-box domain(IPR001810)|F-box-like domain superfamily(IPR036047)	no|down	no|down	no|down	yes|down	1
MsG0380013379.01	F-box domain(IPR001810)|F-box-like domain superfamily(IPR036047)	yes|up	no|up	no|up	no|up	1
MsG0180004856.01	F-box domain(IPR001810)|F-box-like domain superfamily(IPR036047)	no|down	no|down	yes|down	no|down	1
MsG0380016369.01	F-box domain(IPR001810)|F-box-like domain superfamily(IPR036047)	no|down	no|down	yes|down	no|down	1
MsG0880045451.01	F-box domain(IPR001810)|F-box-like domain superfamily(IPR036047)	no|down	yes|down	no|down	no|down	1
MsG0380011943.01	F-box domain(IPR001810)|F-box-like domain superfamily(IPR036047)	no|down	yes|down	no|down	no|down	1
MsG0580024537.01	F-box domain(IPR001810)|Formyl transferase, N-terminal(IPR002376)|Formyltetrahydrofolate deformylase(IPR004810)|FBD domain(IPR006566)|Leucine-rich repeat domain superfamily(IPR032675)|F-box-like domain superfamily(IPR036047)|Formyl transferase, N-terminal domain superfamily(IPR036477)	no|down	no|down	yes|down	yes|down	2
MsG0380017208.01	F-box domain(IPR001810)|Galactose oxidase/kelch, beta-propeller(IPR011043)|F-box associated interaction domain(IPR017451)|F-box-like domain superfamily(IPR036047)	yes|up	yes|up	no|up	no|up	2
MsG0280007129.01	F-box domain(IPR001810)|Galactose oxidase/kelch, beta-propeller(IPR011043)|F-box associated interaction domain(IPR017451)|F-box-like domain superfamily(IPR036047)	yes|up	yes|up	yes|up	no|up	3
MsG0380011938.01	F-box domain(IPR001810)|Galactose oxidase/kelch, beta-propeller(IPR011043)|F-box associated interaction domain(IPR017451)|F-box-like domain superfamily(IPR036047)	no|down	no|down	yes|down	no|down	1
MsG0480019109.01	F-box domain(IPR001810)|Galactose oxidase/kelch, beta-propeller(IPR011043)|F-box associated interaction domain(IPR017451)|F-box-like domain superfamily(IPR036047)	no|up	yes|up	yes|up	no|up	2
MsG0380011792.01	F-box domain(IPR001810)|Galactose oxidase/kelch, beta-propeller(IPR011043)|F-box associated interaction domain(IPR017451)|F-box-like domain superfamily(IPR036047)	no|down	yes|down	no|down	no|down	1
MsG0780037515.01	F-box domain(IPR001810)|Leucine-rich repeat domain superfamily(IPR032675)|F-box-like domain superfamily(IPR036047)	no|down	yes|down	yes|down	no|down	2
MsG0180000457.01	F-box domain(IPR001810)|Leucine-rich repeat domain superfamily(IPR032675)|F-box-like domain superfamily(IPR036047)	no|down	no|down	no|up	yes|up	1
MsG0780040377.01	F-box domain(IPR001810)|Leucine-rich repeat domain superfamily(IPR032675)|F-box-like domain superfamily(IPR036047)	yes|up	yes|up	no|up	yes|up	3
MsG0880045914.01	F-box domain(IPR001810)|Leucine-rich repeat domain superfamily(IPR032675)|F-box-like domain superfamily(IPR036047)	yes|up	yes|up	yes|up	no|up	3
MsG0380011649.01	F-box domain(IPR001810)|Leucine-rich repeat domain superfamily(IPR032675)|F-box-like domain superfamily(IPR036047)	no|up	yes|up	no|up	yes|up	2
MsG0880044263.01	F-box domain(IPR001810)|Leucine-rich repeat domain superfamily(IPR032675)|F-box-like domain superfamily(IPR036047)	no|down	yes|down	no|down	no|down	1
MsG0180003905.01	F-box domain(IPR001810)|Leucine-rich repeat domain superfamily(IPR032675)|F-box-like domain superfamily(IPR036047)	no|down	no|down	no|down	yes|down	1
MsG0380014589.01	F-box domain(IPR001810)|Leucine-rich repeat domain superfamily(IPR032675)|F-box-like domain superfamily(IPR036047)	no|up	yes|up	no|down	no|up	1
MsG0180000602.01	F-box domain(IPR001810)|Leucine-rich repeat, cysteine-containing subtype(IPR006553)|Leucine-rich repeat domain superfamily(IPR032675)|F-box-like domain superfamily(IPR036047)	no|down	no|down	yes|up	yes|up	2
MsG0180005885.01	F-box domain(IPR001810)|Multi antimicrobial extrusion protein(IPR002528)|FBD domain(IPR006566)|Leucine-rich repeat 2(IPR013101)|Leucine-rich repeat domain superfamily(IPR032675)|F-box-like domain superfamily(IPR036047)	no|down	no|up	yes|up	yes|up	2
MsG0180004415.01	F-box domain(IPR001810)|Phloem protein 2-like(IPR025886)|F-box-like domain superfamily(IPR036047)	no|up	no|up	no|up	yes|up	1
MsG0180005491.01	F-box domain(IPR001810)|Phloem protein 2-like(IPR025886)|F-box-like domain superfamily(IPR036047)	no|down	yes|down	no|down	no|down	1
MsG0480020695.01	F-box domain(IPR001810)|Phloem protein 2-like(IPR025886)|F-box-like domain superfamily(IPR036047)	no|down	no|down	yes|down	no|down	1
MsG0180004403.01	F-box domain(IPR001810)|Phloem protein 2-like(IPR025886)|F-box-like domain superfamily(IPR036047)	no|down	yes|down	yes|down	yes|down	3
MsG0580027203.01	F-box domain(IPR001810)|Phosphoribulokinase/uridine kinase(IPR006083)|FBD domain(IPR006566)|CYTH domain(IPR023577)|P-loop containing nucleoside triphosphate hydrolase(IPR027417)|Leucine-rich repeat domain superfamily(IPR032675)|CYTH-like domain superfamily(IPR033469)|F-box-like domain superfamily(IPR036047)	no|down	yes|down	no|down	no|down	1
MsG0680030877.01	F-box-like domain superfamily(IPR036047)	no|down	yes|down	no|down	no|down	1
MsG0180003990.01	F-box-like domain superfamily(IPR036047)	no|down	yes|down	no|down	no|down	1
MsG0880045424.01	F-box-like domain superfamily(IPR036047)	no|up	yes|up	no|up	no|up	1
MsG0880045608.01	F-box-like domain superfamily(IPR036047)	yes|down	yes|down	no|down	no|down	2
MsG0680033251.01	F-box-like domain superfamily(IPR036047)|Paired amphipathic helix superfamily(IPR036600)	yes|up	yes|up	yes|up	no|up	3
MsG0580029237.01	Ferritin/DPS protein domain(IPR008331)|Ferritin-like superfamily(IPR009078)|Ferritin-like(IPR012347)|Ferritin, conserved site(IPR014034)	no|down	yes|down	yes|down	yes|down	3
MsG0480018573.01	Ferritin/DPS protein domain(IPR008331)|Ferritin-like superfamily(IPR009078)|Ferritin-like(IPR012347)|Ferritin, conserved site(IPR014034)	yes|up	yes|up	yes|up	no|up	3
MsG0780041174.01	Fe-S cluster assembly domain superfamily(IPR034904)	no|down	yes|down	no|down	no|down	1
MsG0380016261.01	Fe-S metabolism associated domain, SufE-like(IPR003808)	no|up	no|down	no|up	yes|up	1
MsG0180001073.01	Filament-like plant protein(IPR008587)	no|down	no|down	no|up	yes|down	1
MsG0080048701.01	Filament-like plant protein(IPR008587)	no|up	no|down	no|down	yes|down	1
MsG0480024011.01	FKBP-type peptidyl-prolyl cis-trans isomerase domain(IPR001179)	no|down	yes|down	yes|down	yes|down	3
MsG0280010408.01	FKBP-type peptidyl-prolyl cis-trans isomerase domain(IPR001179)|WD40 repeat(IPR001680)|WD40/YVTN repeat-like-containing domain superfamily(IPR015943)|WD40 repeat, conserved site(IPR019775)|WD40-repeat-containing domain superfamily(IPR036322)	no|up	no|down	no|down	yes|down	1
MsG0380015175.01	Flavin amine oxidase(IPR001613)|Amine oxidase(IPR002937)|FAD/NAD(P)-binding domain superfamily(IPR036188)	no|up	no|up	yes|up	yes|up	2
MsG0880043537.01	Flavin monooxygenase FMO(IPR000960)|Flavin monooxygenase-like(IPR020946)|FAD/NAD(P)-binding domain superfamily(IPR036188)	no|up	no|down	yes|up	yes|up	2
MsG0280008482.01	Flavin monooxygenase FMO(IPR000960)|Flavin monooxygenase-like(IPR020946)|FAD/NAD(P)-binding domain superfamily(IPR036188)	no|up	yes|up	no|up	no|up	1
MsG0480018120.01	FMN-binding split barrel(IPR012349)|Domain of unknown function DUF2470(IPR019595)|Haem oxygenase HugZ-like superfamily(IPR037119)	no|down	no|down	yes|down	no|down	1
MsG0280008778.01	FMN-binding split barrel(IPR012349)|Pyridoxamine 5'-phosphate oxidase, Alr4036 family, FMN-binding domain(IPR024624)	yes|up	yes|up	yes|up	no|up	3
MsG0280009776.01	FMN-dependent dehydrogenase(IPR000262)|FMN-dependent alpha-hydroxy acid dehydrogenase, active site(IPR008259)|Alpha-hydroxy acid dehydrogenase, FMN-dependent(IPR012133)|Aldolase-type TIM barrel(IPR013785)	no|down	yes|up	yes|down	no|down	2
MsG0880045984.01	Formin, FH2 domain(IPR015425)	no|down	no|up	no|down	yes|down	1
MsG0580030139.01	Frigida-like(IPR012474)	no|up	no|no test	no|no test	yes|up	1
MsG0680032055.01	Fructose-1,6-bisphosphatase class 1(IPR000146)|Fructose-1,6-bisphosphatase, active site(IPR020548)|Fructose-1,6-bisphosphatase(IPR028343)|Fructose-1-6-bisphosphatase class I, N-terminal(IPR033391)	no|up	no|up	yes|up	yes|up	2
MsG0280006417.01	Fructose-1,6-bisphosphatase class 1(IPR000146)|Fructose-1,6-bisphosphatase, active site(IPR020548)|Fructose-1,6-bisphosphatase(IPR028343)|Fructose-1-6-bisphosphatase class I, N-terminal(IPR033391)	no|down	yes|down	yes|down	yes|down	3
MsG0680032057.01	Fructose-1,6-bisphosphatase, active site(IPR020548)	no|up	no|down	yes|up	no|up	1
MsG0480021331.01	Fructose-bisphosphate aldolase, class-I(IPR000741)|Aldolase-type TIM barrel(IPR013785)|Fructose-bisphosphate aldolase class-I active site(IPR029768)	no|up	yes|up	yes|up	no|up	2
MsG0180003404.01	Fructose-bisphosphate aldolase, class-I(IPR000741)|Aldolase-type TIM barrel(IPR013785)|Fructose-bisphosphate aldolase class-I active site(IPR029768)	no|down	yes|up	no|down	no|up	1
MsG0480021327.01	Fructose-bisphosphate aldolase, class-I(IPR000741)|Aldolase-type TIM barrel(IPR013785)|Fructose-bisphosphate aldolase class-I active site(IPR029768)	no|up	yes|up	yes|up	yes|up	3
MsG0080049045.01	Fructose-bisphosphate aldolase, class-I(IPR000741)|Aldolase-type TIM barrel(IPR013785)|Fructose-bisphosphate aldolase class-I active site(IPR029768)	no|down	yes|up	no|up	yes|up	2
MsG0780041081.01	Fructose-bisphosphate aldolase, class-I(IPR000741)|Aldolase-type TIM barrel(IPR013785)|Fructose-bisphosphate aldolase class-I active site(IPR029768)	no|up	no|down	yes|up	no|up	1
MsG0780040568.01	Fumarate lyase family(IPR000362)|L-Aspartase-like(IPR008948)|Adenylosuccinate lyase PurB, C-terminal(IPR013539)|Fumarate lyase, conserved site(IPR020557)|Fumarate lyase, N-terminal(IPR022761)|Fumarase/histidase, N-terminal(IPR024083)	yes|up	no|up	yes|up	yes|up	3
MsG0280006820.01	Fungal lipase-like domain(IPR002921)|Alpha/Beta hydrolase fold(IPR029058)	no|up	no|up	yes|down	yes|down	2
MsG0580024566.01	Fungal lipase-like domain(IPR002921)|Alpha/Beta hydrolase fold(IPR029058)	no|up	yes|up	no|up	no|down	1
MsG0180004809.01	Fungal lipase-like domain(IPR002921)|Alpha/Beta hydrolase fold(IPR029058)	yes|up	yes|up	no|up	no|up	2
MsG0280006864.01	Fungal lipase-like domain(IPR002921)|Alpha/Beta hydrolase fold(IPR029058)	no|down	no|down	yes|down	yes|down	2
MsG0480022278.01	Fungal lipase-like domain(IPR002921)|Alpha/Beta hydrolase fold(IPR029058)	no|up	no|down	yes|down	yes|down	2
MsG0680030629.01	Fungal lipase-like domain(IPR002921)|Alpha/Beta hydrolase fold(IPR029058)	yes|up	yes|up	yes|up	no|up	3
MsG0880044766.01	FYVE zinc finger(IPR000306)|Regulator of chromosome condensation, RCC1(IPR000408)|Regulator of chromosome condensation 1/beta-lactamase-inhibitor protein II(IPR009091)|Zinc finger, FYVE/PHD-type(IPR011011)|PH-like domain superfamily(IPR011993)|Zinc finger, RING/FYVE/PHD-type(IPR013083)|Brevis radix (BRX) domain(IPR013591)|Transcription factor BREVIS RADIX, N-terminal domain(IPR027988)	no|down	no|down	no|down	yes|down	1
MsG0180006076.01	GAD-like domain superfamily(IPR004115)|Aminoacyl-tRNA synthetase, class II (D/K/N)(IPR004364)|Zinc finger, DNL-type(IPR007853)|GAD domain(IPR029351)	no|down	yes|down	no|down	no|down	1
MsG0280010309.01	Galactose oxidase/kelch, beta-propeller(IPR011043)|F-box associated interaction domain(IPR017451)|F-box-like domain superfamily(IPR036047)	no|down	yes|down	yes|down	no|down	2
MsG0780040324.01	Galactose-binding-like domain superfamily(IPR008979)|Alpha-L-arabinofuranosidase, C-terminal(IPR010720)|Glycosyl hydrolase, all-beta(IPR013780)|Glycoside hydrolase superfamily(IPR017853)	no|down	yes|down	yes|down	yes|down	3
MsG0580025600.01	Galactose-binding-like domain superfamily(IPR008979)|Rhamnogalacturonate lyase(IPR010325)|Galactose mutarotase-like domain superfamily(IPR011013)|Carbohydrate-binding-like fold(IPR013784)|Rhamnogalacturonan lyase, domain III(IPR029411)|Rhamnogalacturonan lyase, domain II(IPR029413)	no|down	yes|up	no|up	yes|up	2
MsG0480022086.01	GCK(IPR012891)	no|up	yes|up	no|up	no|up	1
MsG0880046556.01	GDP-fucose protein O-fucosyltransferase(IPR019378)	no|down	no|down	no|down	yes|down	1
MsG0480019055.01	GDP-fucose protein O-fucosyltransferase(IPR019378)	yes|up	yes|up	yes|up	no|up	3
MsG0880047353.01	GDP-fucose protein O-fucosyltransferase(IPR019378)|Putative O-fucosyltransferase, plant(IPR024709)	yes|up	yes|up	yes|up	no|up	3
MsG0580025650.01	GDP-fucose protein O-fucosyltransferase(IPR019378)|Putative O-fucosyltransferase, plant(IPR024709)	no|up	no|up	no|up	yes|up	1
MsG0480018851.01	GDP-fucose protein O-fucosyltransferase(IPR019378)|Putative O-fucosyltransferase, plant(IPR024709)	yes|up	yes|up	yes|up	no|up	3
MsG0580025071.01	GDP-mannose 4,6-dehydratase(IPR006368)|NAD(P)-binding domain(IPR016040)|NAD(P)-binding domain superfamily(IPR036291)	no|up	yes|up	no|up	no|up	1
MsG0880046463.01	GDSL lipase/esterase(IPR001087)|GDSL lipase/esterase-like, plant(IPR035669)|SGNH hydrolase superfamily(IPR036514)	yes|up	yes|up	yes|up	yes|up	4
MsG0180004552.01	GDSL lipase/esterase(IPR001087)|GDSL lipase/esterase-like, plant(IPR035669)|SGNH hydrolase superfamily(IPR036514)	no|up	yes|up	no|up	no|up	1
MsG0280006968.01	GDSL lipase/esterase(IPR001087)|GDSL lipase/esterase-like, plant(IPR035669)|SGNH hydrolase superfamily(IPR036514)	no|down	no|down	yes|down	yes|down	2
MsG0180003375.01	GDSL lipase/esterase(IPR001087)|GDSL lipase/esterase-like, plant(IPR035669)|SGNH hydrolase superfamily(IPR036514)	yes|up	yes|up	yes|up	yes|up	4
MsG0180001079.01	GDSL lipase/esterase(IPR001087)|GDSL lipase/esterase-like, plant(IPR035669)|SGNH hydrolase superfamily(IPR036514)	no|up	yes|up	yes|up	yes|up	3
MsG0780041476.01	GDSL lipase/esterase(IPR001087)|GDSL lipase/esterase-like, plant(IPR035669)|SGNH hydrolase superfamily(IPR036514)	no|up	no|up	no|down	yes|down	1
MsG0180001084.01	GDSL lipase/esterase(IPR001087)|GDSL lipase/esterase-like, plant(IPR035669)|SGNH hydrolase superfamily(IPR036514)	no|up	yes|down	no|down	no|down	1
MsG0280006818.01	GDSL lipase/esterase(IPR001087)|GDSL lipase/esterase-like, plant(IPR035669)|SGNH hydrolase superfamily(IPR036514)	no|down	no|down	yes|down	yes|down	2
MsG0580029353.01	GDSL lipase/esterase(IPR001087)|GDSL lipase/esterase-like, plant(IPR035669)|SGNH hydrolase superfamily(IPR036514)	no|up	yes|up	yes|up	yes|up	3
MsG0880045790.01	GDSL lipase/esterase(IPR001087)|GDSL lipase/esterase-like, plant(IPR035669)|SGNH hydrolase superfamily(IPR036514)	yes|up	yes|up	yes|up	yes|up	4
MsG0180000032.01	GDSL lipase/esterase(IPR001087)|Lipase, GDSL, active site(IPR008265)|GDSL lipase/esterase-like, plant(IPR035669)|SGNH hydrolase superfamily(IPR036514)	no|up	no|up	yes|up	yes|up	2
MsG0380013118.01	GDSL lipase/esterase(IPR001087)|RWP-RK domain(IPR003035)|GDSL lipase/esterase-like, plant(IPR035669)|SGNH hydrolase superfamily(IPR036514)	yes|up	yes|up	yes|up	yes|up	4
MsG0280006797.01	GDSL lipase/esterase(IPR001087)|SGNH hydrolase superfamily(IPR036514)	no|up	yes|up	no|up	yes|up	2
MsG0180004549.01	GDSL lipase/esterase(IPR001087)|SGNH hydrolase superfamily(IPR036514)	no|up	yes|up	no|up	no|up	1
MsG0280006962.01	GDSL lipase/esterase(IPR001087)|SGNH hydrolase superfamily(IPR036514)	no|down	no|down	no|down	yes|down	1
MsG0780039237.01	GDSL lipase/esterase(IPR001087)|SGNH hydrolase superfamily(IPR036514)	no|down	no|down	yes|down	yes|down	2
MsG0180005054.01	GDSL lipase/esterase(IPR001087)|SGNH hydrolase superfamily(IPR036514)	no|up	yes|up	no|up	no|up	1
MsG0080048153.01	GDSL lipase/esterase(IPR001087)|UDP-glucuronosyl/UDP-glucosyltransferase(IPR002213)|GDSL lipase/esterase-like, plant(IPR035669)|SGNH hydrolase superfamily(IPR036514)	no|up	no|up	yes|up	yes|up	2
MsG0580029510.01	Geranylgeranyl reductase, plant/prokaryotic(IPR010253)|Geranylgeranyl reductase, plant/cyanobacteria(IPR011774)|FAD/NAD(P)-binding domain superfamily(IPR036188)	no|up	yes|up	yes|up	no|up	2
MsG0880046462.01	Geranylgeranyl reductase, plant/prokaryotic(IPR010253)|Geranylgeranyl reductase, plant/cyanobacteria(IPR011774)|Geranylgeranyl reductase family(IPR011777)|FAD/NAD(P)-binding domain(IPR023753)|FAD/NAD(P)-binding domain superfamily(IPR036188)	no|down	yes|up	no|up	no|up	1
MsG0480018356.01	Germin(IPR001929)|Cupin 1(IPR006045)|RmlC-like cupin domain superfamily(IPR011051)|RmlC-like jelly roll fold(IPR014710)	no|down	no|down	yes|down	yes|down	2
MsG0180004424.01	Germin(IPR001929)|Cupin 1(IPR006045)|RmlC-like cupin domain superfamily(IPR011051)|RmlC-like jelly roll fold(IPR014710)|Germin, manganese binding site(IPR019780)	no|up	no|up	yes|up	no|up	1
MsG0880042729.01	Germin(IPR001929)|Cupin 1(IPR006045)|RmlC-like cupin domain superfamily(IPR011051)|RmlC-like jelly roll fold(IPR014710)|Germin, manganese binding site(IPR019780)	no|up	yes|up	yes|up	no|up	2
MsG0180004728.01	Germin(IPR001929)|Cupin 1(IPR006045)|RmlC-like cupin domain superfamily(IPR011051)|RmlC-like jelly roll fold(IPR014710)|Germin, manganese binding site(IPR019780)	no|down	no|down	yes|down	yes|down	2
MsG0680030382.01	Germin(IPR001929)|Cupin 1(IPR006045)|RmlC-like cupin domain superfamily(IPR011051)|RmlC-like jelly roll fold(IPR014710)|Germin, manganese binding site(IPR019780)	yes|up	no|up	no|up	yes|up	2
MsG0580027033.01	GH3 family(IPR004993)	no|up	no|down	no|down	yes|down	1
MsG0880044688.01	GH3 family(IPR004993)	no|down	no|down	yes|down	yes|down	2
MsG0580027191.01	GH3 family(IPR004993)	no|up	no|down	no|down	yes|down	1
MsG0580024776.01	GH3 family(IPR004993)	no|down	no|up	yes|down	no|down	1
MsG0580024778.01	GH3 family(IPR004993)	no|up	no|down	no|down	yes|down	1
MsG0880043045.01	GH3 family(IPR004993)	no|down	yes|down	no|down	no|down	1
MsG0280010318.01	GH3 family(IPR004993)	no|down	yes|down	yes|down	yes|down	3
MsG0680030315.01	GHMP kinase N-terminal domain(IPR006204)|Ribosomal protein S5 domain 2-type fold(IPR020568)|GHMP kinase, C-terminal domain superfamily(IPR036554)	no|down	no|down	yes|down	no|down	1
MsG0780036252.01	Gibberellin regulated protein(IPR003854)	no|down	no|down	yes|down	yes|down	2
MsG0180000301.01	Gibberellin regulated protein(IPR003854)	yes|up	yes|up	no|up	no|up	2
MsG0880046364.01	Gibberellin regulated protein(IPR003854)	no|up	yes|down	no|down	no|up	1
MsG0180002192.01	Globin(IPR000971)|Leghaemoglobin(IPR001032)|Globin-like superfamily(IPR009050)|Globin/Protoglobin(IPR012292)	no|down	yes|down	no|down	no|up	1
MsG0480021199.01	Globin(IPR000971)|Leghaemoglobin(IPR001032)|Globin-like superfamily(IPR009050)|Globin/Protoglobin(IPR012292)	no|down	no|up	yes|up	yes|up	2
MsG0580029050.01	Globin(IPR000971)|Leghaemoglobin(IPR001032)|Globin-like superfamily(IPR009050)|Globin/Protoglobin(IPR012292)|Leghaemoglobin, iron-binding site(IPR019824)	no|down	yes|up	yes|up	yes|up	3
MsG0480021200.01	Globin(IPR000971)|Leghaemoglobin(IPR001032)|Globin-like superfamily(IPR009050)|Globin/Protoglobin(IPR012292)|Leghaemoglobin, iron-binding site(IPR019824)	no|down	no|up	yes|up	yes|up	2
MsG0880042500.01	Glucose-6-phosphate dehydrogenase(IPR001282)|Glucose-6-phosphate dehydrogenase, active site(IPR019796)|Glucose-6-phosphate dehydrogenase, NAD-binding(IPR022674)|Glucose-6-phosphate dehydrogenase, C-terminal(IPR022675)|NAD(P)-binding domain superfamily(IPR036291)	no|up	yes|up	yes|up	no|up	2
MsG0880041970.01	Glucose-6-phosphate dehydrogenase(IPR001282)|Nucleic acid-binding, OB-fold(IPR012340)|Glucose-6-phosphate dehydrogenase, C-terminal(IPR022675)|MCM OB domain(IPR033762)|Cytochrome P450 superfamily(IPR036396)	no|down	yes|down	yes|down	yes|down	3
MsG0580026186.01	Glucose-methanol-choline oxidoreductase, N-terminal(IPR000172)|Glucose-methanol-choline oxidoreductase, C-terminal(IPR007867)|Glucose-methanol-choline oxidoreductase(IPR012132)|FAD/NAD(P)-binding domain superfamily(IPR036188)	no|down	no|down	yes|down	yes|down	2
MsG0880046102.01	Glutamate/phenylalanine/leucine/valine dehydrogenase(IPR006095)|Glutamate/phenylalanine/leucine/valine dehydrogenase, C-terminal(IPR006096)|Glutamate/phenylalanine/leucine/valine dehydrogenase, dimerisation domain(IPR006097)|Glutamate dehydrogenase(IPR014362)|Leu/Phe/Val dehydrogenases active site(IPR033524)|NAD(P) binding domain of glutamate dehydrogenase(IPR033922)|NAD(P)-binding domain superfa…	no|down	no|down	yes|down	yes|down	2
MsG0680031695.01	Glutamate/phenylalanine/leucine/valine dehydrogenase, dimerisation domain(IPR006097)|Leu/Phe/Val dehydrogenases active site(IPR033524)	no|down	no|down	yes|down	no|down	1
MsG0680031876.01	Glutamate--cysteine ligase, GCS2(IPR006336)|Glutamate--cysteine ligase, plant-type(IPR011556)|Glutamine synthetase/guanido kinase, catalytic domain(IPR014746)|Glutamate--cysteine ligase, bacteria and plant(IPR035434)	no|up	no|up	no|up	yes|up	1
MsG0480023631.01	Glutamate--cysteine ligase, GCS2(IPR006336)|Glutamate--cysteine ligase, plant-type(IPR011556)|Glutamine synthetase/guanido kinase, catalytic domain(IPR014746)|Glutamate--cysteine ligase, bacteria and plant(IPR035434)	no|up	no|up	no|up	yes|up	1
MsG0480023640.01	Glutamate--cysteine ligase, GCS2(IPR006336)|Glutamine synthetase/guanido kinase, catalytic domain(IPR014746)	no|up	no|up	yes|up	yes|up	2
MsG0480022614.01	Glutamine amidotransferase(IPR017926)|Class I glutamine amidotransferase-like(IPR029062)	no|down	yes|down	yes|down	no|down	2
MsG0280006644.01	Glutamine amidotransferase(IPR017926)|Class I glutamine amidotransferase-like(IPR029062)	no|down	no|down	yes|down	no|down	1
MsG0280006507.01	Glutamine amidotransferase(IPR017926)|Class I glutamine amidotransferase-like(IPR029062)	no|down	no|down	yes|down	no|down	1
MsG0380015797.01	Glutaredoxin(IPR002109)|Glutaredoxin, eukaryotic/virial(IPR011899)|Glutaredoxin subgroup(IPR014025)|Thioredoxin-like superfamily(IPR036249)	yes|up	no|up	no|up	no|up	1
MsG0180004895.01	Glutaredoxin(IPR002109)|Glutaredoxin-like, plant II(IPR011905)|Glutaredoxin subgroup(IPR014025)|Thioredoxin-like superfamily(IPR036249)	no|down	yes|down	yes|down	no|down	2
MsG0280007069.01	Glutaredoxin(IPR002109)|Glutaredoxin-like, plant II(IPR011905)|Glutaredoxin subgroup(IPR014025)|Thioredoxin-like superfamily(IPR036249)	no|up	yes|down	no|down	no|up	1
MsG0880047004.01	Glutaredoxin(IPR002109)|Glutaredoxin-like, plant II(IPR011905)|Glutaredoxin subgroup(IPR014025)|Thioredoxin-like superfamily(IPR036249)	no|down	no|down	yes|up	yes|up	2
MsG0780041264.01	Glutaredoxin(IPR002109)|Glutaredoxin-like, plant II(IPR011905)|Glutaredoxin subgroup(IPR014025)|Thioredoxin-like superfamily(IPR036249)	no|down	yes|down	yes|down	yes|down	3
MsG0880047005.01	Glutaredoxin(IPR002109)|Glutaredoxin-like, plant II(IPR011905)|Glutaredoxin subgroup(IPR014025)|Thioredoxin-like superfamily(IPR036249)	no|down	no|down	yes|up	yes|up	2
MsG0780041265.01	Glutaredoxin(IPR002109)|Glutaredoxin-like, plant II(IPR011905)|Glutaredoxin subgroup(IPR014025)|Thioredoxin-like superfamily(IPR036249)	no|down	no|down	yes|down	no|down	1
MsG0280010791.01	Glutaredoxin(IPR002109)|Glutaredoxin-like, plant II(IPR011905)|Thioredoxin-like superfamily(IPR036249)	no|up	yes|up	no|up	yes|up	2
MsG0880047006.01	Glutaredoxin(IPR002109)|Glutaredoxin-like, plant II(IPR011905)|Thioredoxin-like superfamily(IPR036249)	no|no test	no|no test	no|up	yes|up	1
MsG0780041262.01	Glutaredoxin(IPR002109)|Glutaredoxin-like, plant II(IPR011905)|Thioredoxin-like superfamily(IPR036249)	no|down	yes|down	no|down	no|down	1
MsG0280007070.01	Glutaredoxin(IPR002109)|Glutaredoxin-like, plant II(IPR011905)|Thioredoxin-like superfamily(IPR036249)	no|no test	no|up	yes|up	yes|up	2
MsG0680030740.01	Glutaredoxin(IPR002109)|Thioredoxin-like superfamily(IPR036249)	no|up	yes|up	yes|up	no|down	2
MsG0580028470.01	Glutaredoxin(IPR002109)|Thioredoxin-like superfamily(IPR036249)	no|up	yes|up	no|up	no|down	1
MsG0780041132.01	Glutaredoxin(IPR002109)|Thioredoxin-like superfamily(IPR036249)	no|down	no|down	no|down	yes|down	1
MsG0780036235.01	Glutaredoxin(IPR002109)|Thioredoxin-like superfamily(IPR036249)	no|up	no|down	no|down	yes|down	1
MsG0480023708.01	Glutaredoxin(IPR002109)|Thioredoxin-like superfamily(IPR036249)	no|down	yes|up	no|up	no|up	1
MsG0280009764.01	Glutathione S-transferase, C-terminal domain superfamily(IPR036282)	no|up	no|up	yes|up	yes|up	2
MsG0180004941.01	Glutathione S-transferase, C-terminal domain superfamily(IPR036282)	no|up	no|down	yes|up	yes|up	2
MsG0680034475.01	Glutathione S-transferase, N-terminal(IPR004045)|Glutaredoxin active site(IPR011767)|Prostaglandin E synthase 2(IPR034334)|Prostaglandin E synthase 2, C-terminal(IPR034335)|Thioredoxin-like superfamily(IPR036249)|Glutathione S-transferase, C-terminal domain superfamily(IPR036282)	no|up	yes|up	no|up	no|up	1
MsG0580027113.01	Glutathione S-transferase, N-terminal(IPR004045)|Glutaredoxin active site(IPR011767)|Prostaglandin E synthase 2(IPR034334)|Prostaglandin E synthase 2, C-terminal(IPR034335)|Thioredoxin-like superfamily(IPR036249)|Glutathione S-transferase, C-terminal domain superfamily(IPR036282)	no|up	yes|up	yes|up	yes|up	3
MsG0180000016.01	Glutathione S-transferase, N-terminal(IPR004045)|Glutathione S-transferase, C-terminal(IPR004046)|Glutathione S-transferases Phi, C-terminal(IPR034347)|Thioredoxin-like superfamily(IPR036249)|Glutathione S-transferase, C-terminal domain superfamily(IPR036282)	no|down	no|down	yes|up	yes|up	2
MsG0180004879.01	Glutathione S-transferase, N-terminal(IPR004045)|Glutathione S-transferase, C-terminal(IPR004046)|Glutathione S-transferases Phi, C-terminal(IPR034347)|Thioredoxin-like superfamily(IPR036249)|Glutathione S-transferase, C-terminal domain superfamily(IPR036282)	no|up	no|up	no|up	yes|up	1
MsG0780038924.01	Glutathione S-transferase, N-terminal(IPR004045)|Glutathione S-transferase, C-terminal(IPR004046)|Thioredoxin-like superfamily(IPR036249)|Glutathione S-transferase, C-terminal domain superfamily(IPR036282)	no|down	yes|down	no|down	no|up	1
MsG0780038940.01	Glutathione S-transferase, N-terminal(IPR004045)|Glutathione S-transferase, C-terminal(IPR004046)|Thioredoxin-like superfamily(IPR036249)|Glutathione S-transferase, C-terminal domain superfamily(IPR036282)	no|up	no|down	no|up	yes|up	1
MsG0380017037.01	Glutathione S-transferase, N-terminal(IPR004045)|Glutathione S-transferase, C-terminal(IPR004046)|Thioredoxin-like superfamily(IPR036249)|Glutathione S-transferase, C-terminal domain superfamily(IPR036282)	no|up	yes|up	yes|up	yes|up	3
MsG0780038923.01	Glutathione S-transferase, N-terminal(IPR004045)|Glutathione S-transferase, C-terminal(IPR004046)|Thioredoxin-like superfamily(IPR036249)|Glutathione S-transferase, C-terminal domain superfamily(IPR036282)	no|up	no|down	no|up	yes|up	1
MsG0780038936.01	Glutathione S-transferase, N-terminal(IPR004045)|Glutathione S-transferase, C-terminal(IPR004046)|Thioredoxin-like superfamily(IPR036249)|Glutathione S-transferase, C-terminal domain superfamily(IPR036282)	no|up	no|up	no|up	yes|up	1
MsG0580025998.01	Glutathione S-transferase, N-terminal(IPR004045)|Glutathione S-transferase, C-terminal(IPR004046)|Thioredoxin-like superfamily(IPR036249)|Glutathione S-transferase, C-terminal domain superfamily(IPR036282)	no|down	no|down	no|up	yes|up	1
MsG0780038942.01	Glutathione S-transferase, N-terminal(IPR004045)|Glutathione S-transferase, C-terminal(IPR004046)|Thioredoxin-like superfamily(IPR036249)|Glutathione S-transferase, C-terminal domain superfamily(IPR036282)	no|up	no|up	no|up	yes|up	1
MsG0580024232.01	Glutathione S-transferase, N-terminal(IPR004045)|Glutathione S-transferase, C-terminal(IPR004046)|Thioredoxin-like superfamily(IPR036249)|Glutathione S-transferase, C-terminal domain superfamily(IPR036282)	yes|up	no|up	yes|up	yes|up	3
MsG0780038925.01	Glutathione S-transferase, N-terminal(IPR004045)|Glutathione S-transferase, C-terminal(IPR004046)|Thioredoxin-like superfamily(IPR036249)|Glutathione S-transferase, C-terminal domain superfamily(IPR036282)	no|up	no|down	no|up	yes|up	1
MsG0280009760.01	Glutathione S-transferase, N-terminal(IPR004045)|Glutathione S-transferase, C-terminal(IPR004046)|Thioredoxin-like superfamily(IPR036249)|Glutathione S-transferase, C-terminal domain superfamily(IPR036282)	no|up	no|up	yes|up	yes|up	2
MsG0180002272.01	Glutathione S-transferase, N-terminal(IPR004045)|Glutathione S-transferase, C-terminal(IPR004046)|Thioredoxin-like superfamily(IPR036249)|Glutathione S-transferase, C-terminal domain superfamily(IPR036282)	no|up	no|up	yes|up	yes|up	2
MsG0480023109.01	Glutathione S-transferase, N-terminal(IPR004045)|Glutathione S-transferase, C-terminal(IPR004046)|Thioredoxin-like superfamily(IPR036249)|Glutathione S-transferase, C-terminal domain superfamily(IPR036282)	yes|up	no|up	yes|up	yes|up	3
MsG0780038930.01	Glutathione S-transferase, N-terminal(IPR004045)|Glutathione S-transferase, C-terminal(IPR004046)|Thioredoxin-like superfamily(IPR036249)|Glutathione S-transferase, C-terminal domain superfamily(IPR036282)	no|up	no|down	no|down	yes|up	1
MsG0480018904.01	Glutathione S-transferase, N-terminal(IPR004045)|Glutathione S-transferase, C-terminal(IPR004046)|Thioredoxin-like superfamily(IPR036249)|Glutathione S-transferase, C-terminal domain superfamily(IPR036282)	no|up	no|up	yes|up	yes|up	2
MsG0780038922.01	Glutathione S-transferase, N-terminal(IPR004045)|Glutathione S-transferase, C-terminal(IPR004046)|Thioredoxin-like superfamily(IPR036249)|Glutathione S-transferase, C-terminal domain superfamily(IPR036282)	no|down	no|down	no|down	yes|up	1
MsG0180003632.01	Glutathione S-transferase, N-terminal(IPR004045)|Integral membrane protein TerC(IPR005496)|Thioredoxin-like superfamily(IPR036249)|Glutathione S-transferase, C-terminal domain superfamily(IPR036282)	no|down	no|down	no|up	yes|up	1
MsG0180004942.01	Glutathione S-transferase, N-terminal(IPR004045)|Thioredoxin-like superfamily(IPR036249)	no|up	no|down	no|up	yes|up	1
MsG0280009765.01	Glutathione S-transferase, N-terminal(IPR004045)|Thioredoxin-like superfamily(IPR036249)|Glutathione S-transferase, C-terminal domain superfamily(IPR036282)	no|up	no|up	yes|up	yes|up	2
MsG0380015008.01	Glutathione S-transferase, N-terminal(IPR004045)|Thioredoxin-like superfamily(IPR036249)|Glutathione S-transferase, C-terminal domain superfamily(IPR036282)	no|down	yes|down	yes|down	no|down	2
MsG0280009767.01	Glutathione S-transferase, N-terminal(IPR004045)|Thioredoxin-like superfamily(IPR036249)|Glutathione S-transferase, C-terminal domain superfamily(IPR036282)	no|up	no|down	yes|down	yes|down	2
MsG0380015009.01	Glutathione S-transferase, N-terminal(IPR004045)|Thioredoxin-like superfamily(IPR036249)|Glutathione S-transferase, C-terminal domain superfamily(IPR036282)	no|up	no|down	no|up	yes|up	1
MsG0280009762.01	Glutathione S-transferase, N-terminal(IPR004045)|Thioredoxin-like superfamily(IPR036249)|Glutathione S-transferase, C-terminal domain superfamily(IPR036282)	no|up	no|up	yes|up	yes|up	2
MsG0180006227.01	Glutathione S-transferase, N-terminal(IPR004045)|Thioredoxin-like superfamily(IPR036249)|Glutathione S-transferase, C-terminal domain superfamily(IPR036282)	no|down	yes|up	no|down	no|down	1
MsG0280009761.01	Glutathione S-transferase, N-terminal(IPR004045)|Thioredoxin-like superfamily(IPR036249)|Glutathione S-transferase, C-terminal domain superfamily(IPR036282)	no|up	no|up	yes|up	yes|up	2
MsG0480021058.01	Glutathione S-transferase, N-terminal(IPR004045)|Thioredoxin-like superfamily(IPR036249)|Glutathione S-transferase, C-terminal domain superfamily(IPR036282)	no|up	no|up	yes|up	yes|up	2
MsG0380015010.01	Glutathione S-transferase, N-terminal(IPR004045)|Thioredoxin-like superfamily(IPR036249)|Glutathione S-transferase, C-terminal domain superfamily(IPR036282)	no|up	yes|down	no|up	yes|up	2
MsG0880044131.01	Glutathione S-transferase, N-terminal(IPR004045)|Thioredoxin-like superfamily(IPR036249)|Glutathione S-transferase, C-terminal domain superfamily(IPR036282)	yes|up	no|up	no|down	no|down	1
MsG0780041583.01	Glutathione synthase, substrate-binding domain(IPR004887)|Glutathione synthase(IPR005615)|Glutathione synthase, alpha-helical(IPR014042)|Glutathione synthase, N-terminal, eukaryotic(IPR014049)|Glutathione synthase, C-terminal, eukaryotic(IPR014709)|Pre-ATP-grasp domain superfamily(IPR016185)|Glutathione synthase, substrate-binding domain superfamily(IPR037013)	no|up	no|up	yes|up	yes|up	2
MsG0380015213.01	Glutathione-dependent formaldehyde-activating enzyme/centromere protein V(IPR006913)|Mss4-like superfamily(IPR011057)	no|up	no|down	yes|up	yes|up	2
MsG0380016221.01	Glyceraldehyde 3-phosphate dehydrogenase, catalytic domain(IPR020829)	no|up	yes|up	no|up	no|up	1
MsG0280009526.01	Glyceraldehyde 3-phosphate dehydrogenase, NAD(P) binding domain(IPR020828)|Glyceraldehyde 3-phosphate dehydrogenase, catalytic domain(IPR020829)|Glyceraldehyde 3-phosphate dehydrogenase, active site(IPR020830)|Glyceraldehyde/Erythrose phosphate dehydrogenase family(IPR020831)|NAD(P)-binding domain superfamily(IPR036291)	no|up	no|up	no|up	yes|up	1
MsG0780040121.01	Glyceraldehyde-3-phosphate dehydrogenase, type I(IPR006424)|Glyceraldehyde 3-phosphate dehydrogenase, NAD(P) binding domain(IPR020828)|Glyceraldehyde 3-phosphate dehydrogenase, catalytic domain(IPR020829)|Glyceraldehyde 3-phosphate dehydrogenase, active site(IPR020830)|Glyceraldehyde/Erythrose phosphate dehydrogenase family(IPR020831)|NAD(P)-binding domain superfamily(IPR036291)	no|up	yes|up	no|up	no|up	1
MsG0680031381.01	Glycerol-3-phosphate dehydrogenase, NAD-dependent, C-terminal(IPR006109)|Glycerol-3-phosphate dehydrogenase, NAD-dependent(IPR006168)|6-phosphogluconate dehydrogenase-like, C-terminal domain superfamily(IPR008927)|Six-bladed beta-propeller, TolB-like(IPR011042)|Glycerol-3-phosphate dehydrogenase, NAD-dependent, N-terminal(IPR011128)|6-phosphogluconate dehydrogenase, domain 2(IPR013328)|Glycerol-3…	no|down	no|down	no|down	yes|down	1
MsG0580029312.01	Glycine rich protein(IPR010800)	no|up	no|up	yes|up	no|up	1
MsG0580029310.01	Glycine rich protein(IPR010800)	no|down	yes|down	no|down	no|down	1
MsG0580025584.01	Glycine-rich domain-containing protein-like(IPR009836)	no|down	yes|down	no|down	no|down	1
MsG0180005978.01	Glycolipid transfer protein domain(IPR014830)|Cullin repeat-like-containing domain superfamily(IPR016159)|Exocyst component Exo84, C-terminal(IPR032403)|Glycolipid transfer protein superfamily(IPR036497)	yes|up	yes|up	yes|up	no|up	3
MsG0380016476.01	Glycolipid transfer protein domain(IPR014830)|Glycolipid transfer protein superfamily(IPR036497)	no|down	yes|down	yes|down	yes|down	3
MsG0180001027.01	Glycolipid transfer protein superfamily(IPR036497)	no|down	yes|down	no|up	no|up	1
MsG0280007216.01	Glycoside hydrolase family 1(IPR001360)|F-box domain(IPR001810)|Glycoside hydrolase superfamily(IPR017853)|F-box-like domain superfamily(IPR036047)	no|up	no|down	yes|down	yes|down	2
MsG0480021125.01	Glycoside hydrolase family 1(IPR001360)|Glycoside hydrolase superfamily(IPR017853)	no|up	no|up	no|down	yes|down	1
MsG0780038333.01	Glycoside hydrolase family 1(IPR001360)|Glycoside hydrolase superfamily(IPR017853)	yes|up	yes|up	no|up	no|up	2
MsG0380012527.01	Glycoside hydrolase family 1(IPR001360)|Glycoside hydrolase superfamily(IPR017853)	no|up	no|up	yes|up	no|up	1
MsG0480021117.01	Glycoside hydrolase family 1(IPR001360)|Glycoside hydrolase superfamily(IPR017853)	no|up	no|up	yes|up	no|up	1
MsG0680034974.01	Glycoside hydrolase family 1(IPR001360)|Glycoside hydrolase superfamily(IPR017853)	no|down	yes|down	no|down	yes|down	2
MsG0480018687.01	Glycoside hydrolase family 1(IPR001360)|Glycoside hydrolase superfamily(IPR017853)	no|up	yes|up	yes|up	yes|up	3
MsG0480018671.01	Glycoside hydrolase family 1(IPR001360)|Glycoside hydrolase superfamily(IPR017853)	no|down	no|up	yes|up	yes|up	2
MsG0080048490.01	Glycoside hydrolase family 1(IPR001360)|Glycoside hydrolase superfamily(IPR017853)	no|down	yes|down	no|down	no|down	1
MsG0680034959.01	Glycoside hydrolase family 1(IPR001360)|Glycoside hydrolase superfamily(IPR017853)	no|up	no|up	no|up	yes|up	1
MsG0480022231.01	Glycoside hydrolase family 1(IPR001360)|Glycoside hydrolase superfamily(IPR017853)	no|up	no|up	yes|up	no|up	1
MsG0380012654.01	Glycoside hydrolase family 1(IPR001360)|Glycoside hydrolase superfamily(IPR017853)|Glycoside hydrolase family 1, active site(IPR018120)	yes|up	no|up	no|up	no|down	1
MsG0480018617.01	Glycoside hydrolase family 1(IPR001360)|Glycoside hydrolase superfamily(IPR017853)|Glycoside hydrolase family 1, active site(IPR018120)	no|down	no|down	yes|down	yes|down	2
MsG0480021133.01	Glycoside hydrolase family 1(IPR001360)|Glycoside hydrolase superfamily(IPR017853)|Glycoside hydrolase family 1, active site(IPR018120)	no|down	no|up	no|up	yes|up	1
MsG0480021135.01	Glycoside hydrolase family 1(IPR001360)|Glycoside hydrolase superfamily(IPR017853)|Glycoside hydrolase family 1, active site(IPR018120)|Glycosyl hydrolases family 1, N-terminal conserved site(IPR033132)	yes|up	yes|up	yes|up	yes|up	4
MsG0480021131.01	Glycoside hydrolase family 1(IPR001360)|Glycoside hydrolase superfamily(IPR017853)|Glycoside hydrolase family 1, active site(IPR018120)|Glycosyl hydrolases family 1, N-terminal conserved site(IPR033132)	yes|up	no|up	no|up	no|down	1
MsG0480021120.01	Glycoside hydrolase family 1(IPR001360)|Glycoside hydrolase superfamily(IPR017853)|Glycosyl hydrolases family 1, N-terminal conserved site(IPR033132)	no|down	yes|down	yes|down	yes|down	3
MsG0780039254.01	Glycoside hydrolase family 1(IPR001360)|Glycoside hydrolase superfamily(IPR017853)|Glycosyl hydrolases family 1, N-terminal conserved site(IPR033132)	no|down	no|down	yes|down	no|down	1
MsG0380017249.01	Glycoside hydrolase family 10 domain(IPR001000)|Carbohydrate-binding, CenC-like(IPR003305)|Galactose-binding-like domain superfamily(IPR008979)|Glycoside hydrolase superfamily(IPR017853)	no|up	no|down	yes|down	yes|down	2
MsG0280010632.01	Glycoside hydrolase family 16(IPR000757)|Beta-glucanase(IPR008264)|Xyloglucan endo-transglycosylase, C-terminal(IPR010713)|Concanavalin A-like lectin/glucanase domain superfamily(IPR013320)|Xyloglucan endotransglucosylase/hydrolase(IPR016455)	no|up	no|up	no|down	yes|down	1
MsG0480020718.01	Glycoside hydrolase family 16(IPR000757)|Concanavalin A-like lectin/glucanase domain superfamily(IPR013320)	no|down	yes|down	no|down	no|down	1
MsG0180005667.01	Glycoside hydrolase family 16(IPR000757)|Glycoside hydrolase, family 16, active site(IPR008263)|Beta-glucanase(IPR008264)|Xyloglucan endo-transglycosylase, C-terminal(IPR010713)|Concanavalin A-like lectin/glucanase domain superfamily(IPR013320)|Xyloglucan endotransglucosylase/hydrolase(IPR016455)	no|up	no|up	no|up	yes|down	1
MsG0880047493.01	Glycoside hydrolase family 16(IPR000757)|Glycoside hydrolase, family 16, active site(IPR008263)|Beta-glucanase(IPR008264)|Xyloglucan endo-transglycosylase, C-terminal(IPR010713)|Concanavalin A-like lectin/glucanase domain superfamily(IPR013320)|Xyloglucan endotransglucosylase/hydrolase(IPR016455)	yes|up	no|up	no|up	no|up	1
MsG0880047408.01	Glycoside hydrolase family 16(IPR000757)|Glycoside hydrolase, family 16, active site(IPR008263)|Concanavalin A-like lectin/glucanase domain superfamily(IPR013320)	yes|up	no|down	no|down	no|up	1
MsG0880047494.01	Glycoside hydrolase family 16(IPR000757)|Glycoside hydrolase, family 16, active site(IPR008263)|Xyloglucan endo-transglycosylase, C-terminal(IPR010713)|Concanavalin A-like lectin/glucanase domain superfamily(IPR013320)	yes|up	yes|up	yes|up	no|up	3
MsG0380016156.01	Glycoside hydrolase family 16(IPR000757)|Glycoside hydrolase, family 16, active site(IPR008263)|Xyloglucan endo-transglycosylase, C-terminal(IPR010713)|Concanavalin A-like lectin/glucanase domain superfamily(IPR013320)	yes|up	yes|up	no|down	yes|down	3
MsG0780040118.01	Glycoside hydrolase family 16(IPR000757)|Glycoside hydrolase, family 16, active site(IPR008263)|Xyloglucan endo-transglycosylase, C-terminal(IPR010713)|Concanavalin A-like lectin/glucanase domain superfamily(IPR013320)|Xyloglucan endotransglucosylase/hydrolase(IPR016455)	no|up	yes|up	no|down	no|down	1
MsG0880047495.01	Glycoside hydrolase family 16(IPR000757)|Glycoside hydrolase, family 16, active site(IPR008263)|Xyloglucan endo-transglycosylase, C-terminal(IPR010713)|Concanavalin A-like lectin/glucanase domain superfamily(IPR013320)|Xyloglucan endotransglucosylase/hydrolase(IPR016455)	yes|up	yes|up	no|up	no|down	2
MsG0780040119.01	Glycoside hydrolase family 16(IPR000757)|Glycoside hydrolase, family 16, active site(IPR008263)|Xyloglucan endo-transglycosylase, C-terminal(IPR010713)|Concanavalin A-like lectin/glucanase domain superfamily(IPR013320)|Xyloglucan endotransglucosylase/hydrolase(IPR016455)	no|up	yes|up	no|down	no|down	1
MsG0780040117.01	Glycoside hydrolase family 16(IPR000757)|Glycoside hydrolase, family 16, active site(IPR008263)|Xyloglucan endo-transglycosylase, C-terminal(IPR010713)|Concanavalin A-like lectin/glucanase domain superfamily(IPR013320)|Xyloglucan endotransglucosylase/hydrolase(IPR016455)	yes|up	yes|up	no|up	no|down	2
MsG0780040598.01	Glycoside hydrolase family 16(IPR000757)|MIF4G-like, type 3(IPR003890)|Initiation factor eIF-4 gamma, MA3(IPR003891)|Glycoside hydrolase, family 16, active site(IPR008263)|Xyloglucan endo-transglycosylase, C-terminal(IPR010713)|Concanavalin A-like lectin/glucanase domain superfamily(IPR013320)|MIF4G-like domain superfamily(IPR016021)|Armadillo-type fold(IPR016024)	yes|up	yes|up	yes|up	yes|up	4
MsG0880047496.01	Glycoside hydrolase family 16(IPR000757)|Xyloglucan endo-transglycosylase, C-terminal(IPR010713)|Concanavalin A-like lectin/glucanase domain superfamily(IPR013320)|Xyloglucan endotransglucosylase/hydrolase(IPR016455)	yes|up	yes|up	yes|up	no|up	3
MsG0780040987.01	Glycoside hydrolase family 16(IPR000757)|Xyloglucan endo-transglycosylase, C-terminal(IPR010713)|Concanavalin A-like lectin/glucanase domain superfamily(IPR013320)|Xyloglucan endotransglucosylase/hydrolase(IPR016455)	no|up	yes|up	no|up	no|up	1
MsG0480022308.01	Glycoside hydrolase family 17(IPR000490)|Cytochrome P450(IPR001128)|Cytochrome P450, E-class, group I(IPR002401)|X8 domain(IPR012946)|Glycoside hydrolase superfamily(IPR017853)|Cytochrome P450, conserved site(IPR017972)|Cytochrome P450 superfamily(IPR036396)	yes|up	yes|up	yes|up	yes|up	4
MsG0480021782.01	Glycoside hydrolase family 17(IPR000490)|Glycoside hydrolase superfamily(IPR017853)	no|up	no|up	yes|up	no|up	1
MsG0480018346.01	Glycoside hydrolase family 17(IPR000490)|Glycoside hydrolase superfamily(IPR017853)	no|up	no|down	yes|down	yes|down	2
MsG0280010520.01	Glycoside hydrolase family 17(IPR000490)|Glycoside hydrolase superfamily(IPR017853)	no|up	yes|up	no|up	yes|up	2
MsG0280007869.01	Glycoside hydrolase family 17(IPR000490)|Glycoside hydrolase superfamily(IPR017853)	yes|up	yes|up	yes|up	yes|up	4
MsG0180000685.01	Glycoside hydrolase family 17(IPR000490)|Glycoside hydrolase superfamily(IPR017853)	no|down	yes|down	yes|down	yes|down	3
MsG0480021781.01	Glycoside hydrolase family 17(IPR000490)|Glycoside hydrolase superfamily(IPR017853)	no|up	yes|up	no|up	no|up	1
MsG0280007867.01	Glycoside hydrolase family 17(IPR000490)|Glycoside hydrolase superfamily(IPR017853)	no|up	yes|up	yes|up	yes|up	3
MsG0480022156.01	Glycoside hydrolase family 17(IPR000490)|Glycoside hydrolase superfamily(IPR017853)	no|up	no|up	yes|down	yes|down	2
MsG0480021786.01	Glycoside hydrolase family 17(IPR000490)|Glycoside hydrolase superfamily(IPR017853)	no|up	yes|up	yes|up	no|up	2
MsG0280007868.01	Glycoside hydrolase family 17(IPR000490)|Glycoside hydrolase superfamily(IPR017853)	yes|up	yes|up	yes|up	yes|up	4
MsG0480021789.01	Glycoside hydrolase family 17(IPR000490)|Glycoside hydrolase superfamily(IPR017853)	no|up	yes|up	yes|up	no|up	2
MsG0480021787.01	Glycoside hydrolase family 17(IPR000490)|Glycoside hydrolase superfamily(IPR017853)	no|up	yes|up	yes|up	no|up	2
MsG0680035792.01	Glycoside hydrolase family 17(IPR000490)|X8 domain(IPR012946)|Glycoside hydrolase superfamily(IPR017853)	no|down	no|up	no|down	yes|down	1
MsG0480022184.01	Glycoside hydrolase family 17(IPR000490)|X8 domain(IPR012946)|Glycoside hydrolase superfamily(IPR017853)	no|up	no|up	yes|up	yes|up	2
MsG0880046681.01	Glycoside hydrolase family 17(IPR000490)|X8 domain(IPR012946)|Glycoside hydrolase superfamily(IPR017853)	no|up	no|up	yes|down	yes|down	2
MsG0180000698.01	Glycoside hydrolase family 17(IPR000490)|X8 domain(IPR012946)|Glycoside hydrolase superfamily(IPR017853)	no|down	yes|down	yes|down	yes|down	3
MsG0780038402.01	Glycoside hydrolase family 17(IPR000490)|X8 domain(IPR012946)|Glycoside hydrolase superfamily(IPR017853)	no|up	no|up	no|down	yes|down	1
MsG0380017491.01	Glycoside hydrolase family 17(IPR000490)|X8 domain(IPR012946)|Glycoside hydrolase superfamily(IPR017853)	no|up	yes|up	no|up	no|up	1
MsG0180000665.01	Glycoside hydrolase family 17(IPR000490)|X8 domain(IPR012946)|Glycoside hydrolase superfamily(IPR017853)	no|down	yes|down	yes|down	yes|down	3
MsG0380016110.01	Glycoside hydrolase family 17(IPR000490)|X8 domain(IPR012946)|Glycoside hydrolase superfamily(IPR017853)	no|up	yes|up	yes|up	yes|up	3
MsG0380015954.01	Glycoside hydrolase family 17(IPR000490)|Xanthine/uracil/vitamin C permease(IPR006043)|Glycoside hydrolase superfamily(IPR017853)	no|up	no|up	no|down	yes|down	1
MsG0780041713.01	Glycoside hydrolase family 18, catalytic domain(IPR001223)|Glycoside hydrolase, chitinase active site(IPR001579)|Glycoside hydrolase superfamily(IPR017853)	no|down	no|up	yes|down	yes|down	2
MsG0680035653.01	Glycoside hydrolase family 27/36, conserved site(IPR000111)|Glycoside hydrolase, family 27(IPR002241)|Glycosyl hydrolase, all-beta(IPR013780)|Aldolase-type TIM barrel(IPR013785)|Glycoside hydrolase superfamily(IPR017853)|Alpha galactosidase A, C-terminal beta-sandwich domain(IPR035373)	no|down	no|down	yes|up	yes|up	2
MsG0180004804.01	Glycoside hydrolase family 3 C-terminal domain(IPR002772)|Immunoglobulin-like fold(IPR013783)|Glycoside hydrolase superfamily(IPR017853)|Fibronectin type III-like domain(IPR026891)|Glycoside hydrolase family 3 C-terminal domain superfamily(IPR036881)|Glycoside hydrolase, family 3, N-terminal domain superfamily(IPR036962)	no|down	no|down	yes|down	yes|down	2
MsG0180005973.01	Glycoside hydrolase family 31(IPR000322)|Galactose mutarotase-like domain superfamily(IPR011013)|Glycosyl hydrolase, all-beta(IPR013780)|Glycoside hydrolase superfamily(IPR017853)|Glycoside hydrolase family 31, N-terminal domain(IPR025887)|Glycosyl hydrolases family 31, active site(IPR030458)|Galactose mutarotase, N-terminal barrel(IPR031727)	no|down	no|down	no|down	yes|down	1
MsG0580027436.01	Glycoside hydrolase family 31(IPR000322)|Galactose mutarotase-like domain superfamily(IPR011013)|Glycosyl hydrolase, all-beta(IPR013780)|Glycoside hydrolase superfamily(IPR017853)|Glycoside hydrolase family 31, N-terminal domain(IPR025887)|Glycosyl hydrolases family 31, active site(IPR030458)|Galactose mutarotase, N-terminal barrel(IPR031727)	no|down	no|down	no|down	yes|down	1
MsG0880042301.01	Glycoside hydrolase family 9(IPR001701)|Leucine-rich repeat, cysteine-containing subtype(IPR006553)|Six-hairpin glycosidase superfamily(IPR008928)|Six-hairpin glycosidase-like superfamily(IPR012341)|Leucine-rich repeat domain superfamily(IPR032675)|CRAL-TRIO lipid binding domain superfamily(IPR036865)	yes|up	no|up	yes|up	yes|up	3
MsG0380017841.01	Glycoside hydrolase family 9(IPR001701)|Six-hairpin glycosidase superfamily(IPR008928)|Six-hairpin glycosidase-like superfamily(IPR012341)	no|up	yes|up	no|down	no|down	1
MsG0380011756.01	Glycoside hydrolase family 9(IPR001701)|Six-hairpin glycosidase superfamily(IPR008928)|Six-hairpin glycosidase-like superfamily(IPR012341)	no|down	yes|down	yes|down	yes|down	3
MsG0480023913.01	Glycoside hydrolase family 9(IPR001701)|Six-hairpin glycosidase superfamily(IPR008928)|Six-hairpin glycosidase-like superfamily(IPR012341)	no|down	no|down	yes|down	yes|down	2
MsG0480021512.01	Glycoside hydrolase family 9(IPR001701)|Six-hairpin glycosidase superfamily(IPR008928)|Six-hairpin glycosidase-like superfamily(IPR012341)|Carbohydrate binding domain CBM49(IPR019028)	no|up	no|down	yes|up	no|up	1
MsG0480021526.01	Glycoside hydrolase family 9(IPR001701)|Six-hairpin glycosidase superfamily(IPR008928)|Six-hairpin glycosidase-like superfamily(IPR012341)|Carbohydrate binding domain CBM49(IPR019028)	no|up	no|down	yes|up	no|up	1
MsG0480021718.01	Glycoside hydrolase family 9(IPR001701)|Six-hairpin glycosidase superfamily(IPR008928)|Six-hairpin glycosidase-like superfamily(IPR012341)|Carbohydrate binding domain CBM49(IPR019028)	no|down	no|up	yes|up	no|up	1
MsG0380015944.01	Glycoside hydrolase family 9(IPR001701)|Six-hairpin glycosidase superfamily(IPR008928)|Six-hairpin glycosidase-like superfamily(IPR012341)|Glycoside hydrolase family 9, His active site(IPR018221)	no|up	no|down	no|down	yes|down	1
MsG0180004835.01	Glycoside hydrolase family 9(IPR001701)|Six-hairpin glycosidase superfamily(IPR008928)|Six-hairpin glycosidase-like superfamily(IPR012341)|Glycoside hydrolase family 9, His active site(IPR018221)|Glycosyl hydrolases family 9, Asp/Glu active sites(IPR033126)	no|down	no|down	no|down	yes|down	1
MsG0380011697.01	Glycoside hydrolase superfamily(IPR017853)	no|down	yes|down	no|down	no|up	1
MsG0280008362.01	Glycoside hydrolase superfamily(IPR017853)	no|down	yes|down	yes|down	yes|down	3
MsG0280007082.01	Glycoside hydrolase, family 14(IPR001554)|Glycoside hydrolase superfamily(IPR017853)	no|down	yes|down	no|down	no|down	1
MsG0880046084.01	Glycoside hydrolase, family 14(IPR001554)|Glycoside hydrolase superfamily(IPR017853)|Glycoside hydrolase, family 14, conserved site(IPR018238)	no|up	yes|down	yes|down	yes|down	3
MsG0780036485.01	Glycoside hydrolase, family 14(IPR001554)|Nucleic acid-binding, OB-fold(IPR012340)|Glycoside hydrolase superfamily(IPR017853)	yes|down	no|down	no|down	no|down	1
MsG0580029539.01	Glycoside hydrolase, family 14(IPR001554)|Transcription factor GRAS(IPR005202)|Domain of unknown function DUF676, lipase-like(IPR007751)|Glycoside hydrolase superfamily(IPR017853)	no|up	yes|up	no|up	yes|up	2
MsG0280011136.01	Glycoside hydrolase, family 19, catalytic(IPR000726)|Chitin-binding, type 1(IPR001002)|Chitin-binding, type 1, conserved site(IPR018371)|Lysozyme-like domain superfamily(IPR023346)|Endochitinase-like superfamily(IPR036861)	no|up	no|up	yes|up	no|up	1
MsG0880045571.01	Glycoside hydrolase, family 19, catalytic(IPR000726)|Chitin-binding, type 1(IPR001002)|Chitin-binding, type 1, conserved site(IPR018371)|Lysozyme-like domain superfamily(IPR023346)|Endochitinase-like superfamily(IPR036861)	no|up	yes|up	no|up	no|up	1
MsG0880045572.01	Glycoside hydrolase, family 19, catalytic(IPR000726)|Chitin-binding, type 1(IPR001002)|Glycoside hydrolase, family 19(IPR016283)|Chitin-binding, type 1, conserved site(IPR018371)|Lysozyme-like domain superfamily(IPR023346)|Endochitinase-like superfamily(IPR036861)	yes|up	yes|up	no|up	no|down	2
MsG0380018070.01	Glycoside hydrolase, family 19, catalytic(IPR000726)|Chitin-binding, type 1(IPR001002)|Glycoside hydrolase, family 19(IPR016283)|Chitin-binding, type 1, conserved site(IPR018371)|Lysozyme-like domain superfamily(IPR023346)|Endochitinase-like superfamily(IPR036861)	yes|up	no|up	yes|up	yes|up	3
MsG0880042173.01	Glycoside hydrolase, family 19, catalytic(IPR000726)|Chitin-binding, type 1(IPR001002)|Glycoside hydrolase, family 19(IPR016283)|Chitin-binding, type 1, conserved site(IPR018371)|Lysozyme-like domain superfamily(IPR023346)|Endochitinase-like superfamily(IPR036861)	yes|up	no|up	no|up	no|down	1
MsG0280011135.01	Glycoside hydrolase, family 19, catalytic(IPR000726)|Chitin-binding, type 1(IPR001002)|Glycoside hydrolase, family 19(IPR016283)|Lysozyme-like domain superfamily(IPR023346)|Endochitinase-like superfamily(IPR036861)	no|up	yes|up	no|up	no|down	1
MsG0780036259.01	Glycoside hydrolase, family 19, catalytic(IPR000726)|Glycoside hydrolase, family 19(IPR016283)|Lysozyme-like domain superfamily(IPR023346)	no|up	no|up	yes|up	yes|up	2
MsG0280007878.01	Glycoside hydrolase, family 19, catalytic(IPR000726)|Glycoside hydrolase, family 19(IPR016283)|Lysozyme-like domain superfamily(IPR023346)	no|up	no|down	no|down	yes|down	1
MsG0780041426.01	Glycoside hydrolase, family 19, catalytic(IPR000726)|Glycoside hydrolase, family 19(IPR016283)|Lysozyme-like domain superfamily(IPR023346)	no|up	yes|up	yes|up	yes|up	3
MsG0780036260.01	Glycoside hydrolase, family 19, catalytic(IPR000726)|Lysozyme-like domain superfamily(IPR023346)	no|up	no|up	yes|up	yes|up	2
MsG0780036258.01	Glycoside hydrolase, family 19, catalytic(IPR000726)|Lysozyme-like domain superfamily(IPR023346)	no|up	no|up	no|up	yes|up	1
MsG0780041752.01	Glycoside hydrolase, family 19, catalytic(IPR000726)|Lysozyme-like domain superfamily(IPR023346)|Leucine-rich repeat domain superfamily(IPR032675)	yes|up	no|up	no|up	no|down	1
MsG0480023238.01	Glycoside hydrolase, family 27(IPR002241)|Glycosyl hydrolase, all-beta(IPR013780)|Aldolase-type TIM barrel(IPR013785)|Glycoside hydrolase superfamily(IPR017853)|Ricin B-like lectins(IPR035992)	no|down	no|down	no|down	yes|down	1
MsG0580025757.01	Glycoside hydrolase, family 28(IPR000743)|Pectin lyase fold/virulence factor(IPR011050)	no|down	no|up	yes|up	yes|up	2
MsG0780037927.01	Glycoside hydrolase, family 28(IPR000743)|Pectin lyase fold/virulence factor(IPR011050)|Pectin lyase fold(IPR012334)	no|up	no|up	yes|up	no|up	1
MsG0280007923.01	Glycoside hydrolase, family 28(IPR000743)|Pectin lyase fold/virulence factor(IPR011050)|Pectin lyase fold(IPR012334)	no|up	no|up	no|down	yes|down	1
MsG0280008741.01	Glycoside hydrolase, family 28(IPR000743)|Pectin lyase fold/virulence factor(IPR011050)|Pectin lyase fold(IPR012334)	no|down	no|down	yes|down	yes|down	2
MsG0280011377.01	Glycoside hydrolase, family 28(IPR000743)|Pectin lyase fold/virulence factor(IPR011050)|Pectin lyase fold(IPR012334)	no|down	no|down	yes|down	yes|down	2
MsG0780037930.01	Glycoside hydrolase, family 28(IPR000743)|Pectin lyase fold/virulence factor(IPR011050)|Pectin lyase fold(IPR012334)	no|up	no|up	yes|up	no|up	1
MsG0680030406.01	Glycoside hydrolase, family 28(IPR000743)|Pectin lyase fold/virulence factor(IPR011050)|Pectin lyase fold(IPR012334)	no|up	yes|up	yes|up	yes|up	3
MsG0380016839.01	Glycoside hydrolase, family 28(IPR000743)|Pectin lyase fold/virulence factor(IPR011050)|Pectin lyase fold(IPR012334)	yes|up	yes|up	yes|up	no|up	3
MsG0280007806.01	Glycoside hydrolase, family 28(IPR000743)|Pectin lyase fold/virulence factor(IPR011050)|Pectin lyase fold(IPR012334)	no|up	yes|up	yes|up	yes|up	3
MsG0780041424.01	Glycoside hydrolase, family 28(IPR000743)|Pectin lyase fold/virulence factor(IPR011050)|Pectin lyase fold(IPR012334)	no|down	no|up	no|down	yes|down	1
MsG0780039739.01	Glycoside hydrolase, family 28(IPR000743)|Pectin lyase fold/virulence factor(IPR011050)|Pectin lyase fold(IPR012334)	no|up	yes|up	yes|up	yes|up	3
MsG0580025736.01	Glycoside hydrolase, family 28(IPR000743)|Pectin lyase fold/virulence factor(IPR011050)|Pectin lyase fold(IPR012334)	no|down	yes|up	no|up	no|down	1
MsG0480019954.01	Glycoside hydrolase, family 28(IPR000743)|Pectin lyase fold/virulence factor(IPR011050)|Pectin lyase fold(IPR012334)	no|up	yes|up	no|up	no|up	1
MsG0880045104.01	Glycoside hydrolase, family 28(IPR000743)|Pectin lyase fold/virulence factor(IPR011050)|Pectin lyase fold(IPR012334)	no|down	yes|up	yes|up	yes|up	3
MsG0680031684.01	Glycoside hydrolase, family 3, N-terminal(IPR001764)|Glycoside hydrolase family 3 C-terminal domain(IPR002772)|Glycoside hydrolase superfamily(IPR017853)|Glycoside hydrolase family 3 C-terminal domain superfamily(IPR036881)|Glycoside hydrolase, family 3, N-terminal domain superfamily(IPR036962)	no|down	no|down	yes|down	yes|down	2
MsG0280007692.01	Glycoside hydrolase, family 3, N-terminal(IPR001764)|Glycoside hydrolase family 3 C-terminal domain(IPR002772)|Glycoside hydrolase superfamily(IPR017853)|Glycoside hydrolase family 3 C-terminal domain superfamily(IPR036881)|Glycoside hydrolase, family 3, N-terminal domain superfamily(IPR036962)	no|down	no|down	no|down	yes|down	1
MsG0780041354.01	Glycoside hydrolase, family 3, N-terminal(IPR001764)|Glycoside hydrolase family 3 C-terminal domain(IPR002772)|Immunoglobulin-like fold(IPR013783)|Glycoside hydrolase superfamily(IPR017853)|Fibronectin type III-like domain(IPR026891)|Glycoside hydrolase family 3 C-terminal domain superfamily(IPR036881)|Glycoside hydrolase, family 3, N-terminal domain superfamily(IPR036962)	no|down	no|down	yes|down	no|down	1
MsG0180005764.01	Glycoside hydrolase, family 3, N-terminal(IPR001764)|Glycoside hydrolase family 3 C-terminal domain(IPR002772)|Immunoglobulin-like fold(IPR013783)|Glycoside hydrolase superfamily(IPR017853)|Fibronectin type III-like domain(IPR026891)|Glycoside hydrolase family 3 C-terminal domain superfamily(IPR036881)|Glycoside hydrolase, family 3, N-terminal domain superfamily(IPR036962)	no|down	no|down	yes|down	yes|down	2
MsG0780040187.01	Glycoside hydrolase, family 3, N-terminal(IPR001764)|Glycoside hydrolase superfamily(IPR017853)|Glycoside hydrolase, family 3, N-terminal domain superfamily(IPR036962)	no|down	no|down	yes|down	yes|down	2
MsG0180004803.01	Glycoside hydrolase, family 3, N-terminal(IPR001764)|Glycoside hydrolase superfamily(IPR017853)|Glycoside hydrolase, family 3, N-terminal domain superfamily(IPR036962)	no|up	no|down	yes|down	yes|down	2
MsG0180000437.01	Glycoside hydrolase, family 32(IPR001362)|Glycosyl hydrolase family 32, N-terminal(IPR013148)|Glycosyl hydrolase family 32, C-terminal(IPR013189)|Concanavalin A-like lectin/glucanase domain superfamily(IPR013320)|Glycosyl hydrolase, five-bladed beta-propellor domain superfamily(IPR023296)	no|up	no|up	no|down	yes|down	1
MsG0180000436.01	Glycoside hydrolase, family 32(IPR001362)|Glycosyl hydrolase family 32, N-terminal(IPR013148)|Glycosyl hydrolase family 32, C-terminal(IPR013189)|Concanavalin A-like lectin/glucanase domain superfamily(IPR013320)|Glycosyl hydrolase, five-bladed beta-propellor domain superfamily(IPR023296)	no|down	no|down	yes|down	yes|down	2
MsG0280011203.01	Glycoside hydrolase, family 32(IPR001362)|Glycosyl hydrolase family 32, N-terminal(IPR013148)|Glycosyl hydrolase family 32, C-terminal(IPR013189)|Concanavalin A-like lectin/glucanase domain superfamily(IPR013320)|Glycosyl hydrolase, five-bladed beta-propellor domain superfamily(IPR023296)	yes|up	yes|up	no|up	yes|up	3
MsG0180000438.01	Glycoside hydrolase, family 32(IPR001362)|Glycosyl hydrolase family 32, N-terminal(IPR013148)|Glycosyl hydrolase, five-bladed beta-propellor domain superfamily(IPR023296)	no|down	no|down	yes|down	yes|down	2
MsG0180000115.01	Glycoside hydrolase, family 35(IPR001944)|Galactose-binding-like domain superfamily(IPR008979)|Glycoside hydrolase superfamily(IPR017853)|Glycoside hydrolase, family 35, conserved site(IPR019801)|Glycoside hydrolase 35, catalytic domain(IPR031330)	no|down	no|up	no|down	yes|down	1
MsG0880043874.01	Glycoside hydrolase, family 35(IPR001944)|Galactose-binding-like domain superfamily(IPR008979)|Glycoside hydrolase superfamily(IPR017853)|Glycoside hydrolase, family 35, conserved site(IPR019801)|Glycoside hydrolase 35, catalytic domain(IPR031330)	no|down	no|down	yes|down	yes|down	2
MsG0480023727.01	Glycoside hydrolase, family 37(IPR001661)|Six-hairpin glycosidase superfamily(IPR008928)|Six-hairpin glycosidase-like superfamily(IPR012341)|Glycoside hydrolase, family 37, conserved site(IPR018232)	no|up	no|up	yes|up	no|up	1
MsG0580027714.01	Glycoside hydrolase, family 5(IPR001547)|Actin-crosslinking(IPR008999)|Glycoside hydrolase superfamily(IPR017853)	no|down	no|up	no|up	yes|up	1
MsG0580027607.01	Glycoside hydrolase, family 5(IPR001547)|Actin-crosslinking(IPR008999)|Glycoside hydrolase superfamily(IPR017853)	no|down	no|down	yes|up	yes|up	2
MsG0580027716.01	Glycoside hydrolase, family 5(IPR001547)|Glycoside hydrolase superfamily(IPR017853)	no|up	no|up	yes|up	yes|up	2
MsG0380011702.01	Glycoside hydrolase, family 5(IPR001547)|Glycoside hydrolase superfamily(IPR017853)	yes|up	no|down	no|up	yes|up	2
MsG0480019898.01	Glycoside hydrolase, family 5(IPR001547)|Glycoside hydrolase superfamily(IPR017853)	no|up	no|up	no|up	yes|up	1
MsG0880041912.01	Glycoside hydrolase, family 5(IPR001547)|Glycoside hydrolase superfamily(IPR017853)	no|up	no|down	yes|down	no|down	1
MsG0880046858.01	Glycoside hydrolase, family 79(IPR005199)|Glycoside hydrolase superfamily(IPR017853)	no|down	no|up	no|down	yes|down	1
MsG0380012444.01	Glycoside hydrolase, family 79(IPR005199)|Glycoside hydrolase superfamily(IPR017853)	no|down	yes|up	no|up	no|up	1
MsG0580026001.01	Glycosyl hydrolase family 100(IPR024746)	yes|up	no|up	no|up	yes|up	2
MsG0780036926.01	Glycosyl hydrolase family 100(IPR024746)|Domain of unknown function DUF4283(IPR025558)|Histidine kinase/HSP90-like ATPase superfamily(IPR036890)	no|down	no|down	yes|down	no|down	1
MsG0780036467.01	Glycosyl hydrolase, all-beta(IPR013780)|Aldolase-type TIM barrel(IPR013785)|Glycoside hydrolase superfamily(IPR017853)	no|up	yes|up	no|down	no|up	1
MsG0480023236.01	Glycosyl hydrolase, all-beta(IPR013780)|Glycoside hydrolase superfamily(IPR017853)|Ricin B-like lectins(IPR035992)	no|down	no|down	no|down	yes|down	1
MsG0580030022.01	Glycosyl hydrolases 36(IPR008811)|Aldolase-type TIM barrel(IPR013785)|Glycoside hydrolase superfamily(IPR017853)	no|down	yes|down	no|down	yes|up	2
MsG0580030055.01	Glycosyl hydrolases 36(IPR008811)|Aldolase-type TIM barrel(IPR013785)|Glycoside hydrolase superfamily(IPR017853)	no|up	yes|down	no|up	yes|up	2
MsG0880046308.01	Glycosyl hydrolases 36(IPR008811)|Glycoside hydrolase superfamily(IPR017853)	no|up	no|down	no|down	yes|down	1
MsG0380015739.01	Glycosyl hydrolases 36(IPR008811)|Glycoside hydrolase superfamily(IPR017853)	no|up	no|down	yes|down	yes|down	2
MsG0880042895.01	Glycosyl transferase, family 1(IPR001296)|Bacterial/plant glycogen synthase(IPR011835)|Starch synthase, catalytic domain(IPR013534)	no|down	no|down	no|down	yes|down	1
MsG0880045458.01	Glycosyl transferase, family 1(IPR001296)|Glycosyltransferase subfamily 4-like, N-terminal domain(IPR028098)	no|up	no|up	yes|up	yes|up	2
MsG0580027360.01	Glycosyl transferase, family 14(IPR003406)	no|up	no|up	yes|up	no|up	1
MsG0280006296.01	Glycosyl transferase, family 14(IPR003406)	no|up	yes|up	no|up	no|up	1
MsG0180002068.01	Glycosyl transferase, family 14(IPR003406)	no|down	no|down	no|down	yes|down	1
MsG0180005942.01	Glycosyl transferase, family 14(IPR003406)	no|up	yes|up	yes|up	no|up	2
MsG0480023247.01	Glycosyl transferase, family 17(IPR006813)	yes|up	yes|up	no|up	no|up	2
MsG0480023950.01	Glycosyl transferase, family 20(IPR001830)|Trehalose-phosphatase(IPR003337)|HAD-superfamily hydrolase, subfamily IIB(IPR006379)|HAD superfamily(IPR023214)|HAD-like superfamily(IPR036412)	no|down	yes|down	yes|down	yes|down	3
MsG0880047531.01	Glycosyl transferase, family 20(IPR001830)|Trehalose-phosphatase(IPR003337)|HAD-superfamily hydrolase, subfamily IIB(IPR006379)|HAD superfamily(IPR023214)|HAD-like superfamily(IPR036412)	no|down	yes|down	yes|down	yes|down	3
MsG0280006720.01	Glycosyl transferase, family 48(IPR003440)	no|down	yes|down	no|down	no|down	1
MsG0280009835.01	Glycosyl transferase, family 48(IPR003440)|Vacuolar protein sorting-associate protein Vta1/Callose synthase, N-terminal(IPR023175)|1,3-beta-glucan synthase subunit FKS1-like, domain-1(IPR026899)	no|up	no|up	yes|up	no|up	1
MsG0380013639.01	Glycosyl transferase, family 48(IPR003440)|Vacuolar protein sorting-associate protein Vta1/Callose synthase, N-terminal(IPR023175)|1,3-beta-glucan synthase subunit FKS1-like, domain-1(IPR026899)	no|down	no|down	yes|down	yes|down	2
MsG0780041341.01	Glycosyl transferase, family 8(IPR002495)|Nucleotide-diphospho-sugar transferases(IPR029044)	no|up	no|up	no|down	yes|down	1
MsG0880047650.01	Glycosyl transferase, family 8(IPR002495)|Nucleotide-diphospho-sugar transferases(IPR029044)	yes|up	no|up	no|up	no|up	1
MsG0380017753.01	Glycosyl transferase, family 8(IPR002495)|Nucleotide-diphospho-sugar transferases(IPR029044)	no|up	yes|up	no|up	no|down	1
MsG0780036412.01	Glycosyl transferase, family 8(IPR002495)|Nucleotide-diphospho-sugar transferases(IPR029044)	no|up	no|down	yes|down	no|down	1
MsG0780041477.01	Glycosyl transferase, family 8(IPR002495)|Nucleotide-diphospho-sugar transferases(IPR029044)	no|down	no|down	no|down	yes|down	1
MsG0680030659.01	Glycosyl transferase, family 8(IPR002495)|Nucleotide-diphospho-sugar transferases(IPR029044)	yes|up	yes|up	yes|up	no|up	3
MsG0280010357.01	Glycosyl transferase, family 8(IPR002495)|Nucleotide-diphospho-sugar transferases(IPR029044)	no|down	yes|down	yes|down	yes|down	3
MsG0180000185.01	Glycosyl transferase, family 8(IPR002495)|Nucleotide-diphospho-sugar transferases(IPR029044)	no|up	no|down	yes|down	yes|down	2
MsG0680030621.01	Glycosyltransferase 2-like(IPR001173)|Nucleotide-diphospho-sugar transferases(IPR029044)	yes|up	yes|up	yes|up	no|up	3
MsG0880047049.01	Glycosyltransferase 34(IPR008630)	no|up	yes|up	yes|up	no|up	2
MsG0780041293.01	Glycosyltransferase 34(IPR008630)	no|up	yes|up	no|up	no|up	1
MsG0880046475.01	Glycosyltransferase 34(IPR008630)|Nucleotide-diphospho-sugar transferases(IPR029044)	yes|up	yes|up	yes|up	no|up	3
MsG0580024722.01	Glycosyltransferase 34(IPR008630)|Nucleotide-diphospho-sugar transferases(IPR029044)	no|up	no|up	no|down	yes|down	1
MsG0580025982.01	Glycosyltransferase family 92(IPR008166)	yes|up	yes|up	no|up	no|up	2
MsG0580029697.01	Glyoxalase/fosfomycin resistance/dioxygenase domain(IPR004360)|4-hydroxyphenylpyruvate dioxygenase(IPR005956)|Glyoxalase/Bleomycin resistance protein/Dihydroxybiphenyl dioxygenase(IPR029068)	no|up	yes|down	no|down	no|up	1
MsG0180006120.01	Glyoxalase/fosfomycin resistance/dioxygenase domain(IPR004360)|Aluminum-activated malate transporter(IPR020966)|Glyoxalase/Bleomycin resistance protein/Dihydroxybiphenyl dioxygenase(IPR029068)	no|down	no|down	yes|down	yes|down	2
MsG0280011381.01	Glyoxalase/fosfomycin resistance/dioxygenase domain(IPR004360)|Glyoxalase/Bleomycin resistance protein/Dihydroxybiphenyl dioxygenase(IPR029068)	no|down	yes|down	yes|down	yes|down	3
MsG0580024152.01	GNAT domain(IPR000182)|Acyl-CoA N-acyltransferase(IPR016181)	yes|up	yes|up	yes|up	no|up	3
MsG0280008400.01	GNAT domain(IPR000182)|Acyl-CoA N-acyltransferase(IPR016181)	no|down	yes|down	no|down	no|up	1
MsG0580024751.01	GNAT domain(IPR000182)|Acyl-CoA N-acyltransferase(IPR016181)	yes|down	yes|down	no|down	no|down	2
MsG0180005574.01	GNAT domain(IPR000182)|Acyl-CoA N-acyltransferase(IPR016181)	no|down	yes|down	yes|down	yes|down	3
MsG0280006560.01	Gnk2-homologous domain(IPR002902)|Endonuclease/exonuclease/phosphatase superfamily(IPR036691)|Gnk2-homologous domain superfamily(IPR038408)	no|down	yes|down	yes|down	yes|down	3
MsG0180001828.01	Gnk2-homologous domain(IPR002902)|Gnk2-homologous domain superfamily(IPR038408)	no|up	no|up	yes|up	no|up	1
MsG0180004460.01	Gnk2-homologous domain(IPR002902)|Gnk2-homologous domain superfamily(IPR038408)	yes|up	yes|up	yes|up	yes|up	4
MsG0280006559.01	Gnk2-homologous domain(IPR002902)|Gnk2-homologous domain superfamily(IPR038408)	no|down	yes|down	yes|down	yes|down	3
MsG0580027441.01	GOLD domain(IPR009038)	no|up	yes|up	no|up	no|up	1
MsG0380014259.01	G-patch domain(IPR000467)|Zinc finger, CCCH-type(IPR000571)|Zinc finger, CCCH-type superfamily(IPR036855)	no|down	yes|down	no|down	no|down	1
MsG0180006110.01	GRAM domain(IPR004182)	no|down	no|down	yes|down	no|down	1
MsG0480023731.01	GRAM domain(IPR004182)|PH-like domain superfamily(IPR011993)	yes|up	yes|up	yes|up	no|up	3
MsG0180006111.01	GRAM domain(IPR004182)|PH-like domain superfamily(IPR011993)	no|down	no|down	no|down	yes|down	1
MsG0180005838.01	Granulin(IPR000118)|Cysteine peptidase, cysteine active site(IPR000169)|Peptidase C1A, papain C-terminal(IPR000668)|Cathepsin propeptide inhibitor domain (I29)(IPR013201)|Cysteine peptidase, histidine active site(IPR025660)|Cysteine peptidase, asparagine active site(IPR025661)|Granulin superfamily(IPR037277)	yes|up	no|up	no|up	no|up	1
MsG0580025604.01	GroES-like superfamily(IPR011032)|Alcohol dehydrogenase, C-terminal(IPR013149)|Alcohol dehydrogenase, N-terminal(IPR013154)|NAD(P)-binding domain superfamily(IPR036291)	no|up	no|down	no|up	yes|up	1
MsG0880042223.01	GroES-like superfamily(IPR011032)|Alcohol dehydrogenase, C-terminal(IPR013149)|NAD(P)-binding domain superfamily(IPR036291)	no|down	no|up	no|up	yes|up	1
MsG0280010594.01	GroES-like superfamily(IPR011032)|Alcohol dehydrogenase, C-terminal(IPR013149)|Polyketide synthase, enoylreductase domain(IPR020843)|NAD(P)-binding domain superfamily(IPR036291)	no|down	no|down	no|down	yes|down	1
MsG0580029930.01	GroES-like superfamily(IPR011032)|Alcohol dehydrogenase, C-terminal(IPR013149)|Polyketide synthase, enoylreductase domain(IPR020843)|NAD(P)-binding domain superfamily(IPR036291)	no|up	no|up	no|up	yes|up	1
MsG0480023529.01	GroES-like superfamily(IPR011032)|Alcohol dehydrogenase, N-terminal(IPR013154)	no|down	no|down	yes|down	yes|down	2
MsG0480019593.01	GroES-like superfamily(IPR011032)|Alcohol dehydrogenase, N-terminal(IPR013154)|Polyketide synthase, enoylreductase domain(IPR020843)|NAD(P)-binding domain superfamily(IPR036291)	yes|up	no|up	no|up	no|down	1
MsG0380017606.01	GroES-like superfamily(IPR011032)|GroES chaperonin family(IPR020818)|GroES chaperonin superfamily(IPR037124)	no|up	yes|up	no|up	no|up	1
MsG0680032333.01	GroES-like superfamily(IPR011032)|NAD(P)-binding domain superfamily(IPR036291)	no|up	yes|up	yes|up	no|up	2
MsG0880042150.01	GroES-like superfamily(IPR011032)|NAD(P)-binding domain superfamily(IPR036291)	no|down	no|up	no|up	yes|up	1
MsG0780036121.01	GroES-like superfamily(IPR011032)|Tetratricopeptide-like helical domain superfamily(IPR011990)|Alcohol dehydrogenase, C-terminal(IPR013149)|NAD(P)-binding domain superfamily(IPR036291)	no|up	no|up	no|up	yes|up	1
MsG0780040284.01	GrpE nucleotide exchange factor(IPR000740)|Multi antimicrobial extrusion protein(IPR002528)|GrpE nucleotide exchange factor, head(IPR009012)	no|down	no|down	no|up	yes|down	1
MsG0280009158.01	GTD-binding domain(IPR007656)	yes|up	yes|up	no|up	no|up	2
MsG0480022610.01	GTD-binding domain(IPR007656)|Methylmalonate-semialdehyde dehydrogenase(IPR010061)|Aldehyde dehydrogenase domain(IPR015590)|Aldehyde/histidinol dehydrogenase(IPR016161)|Aldehyde dehydrogenase, N-terminal(IPR016162)|Aldehyde dehydrogenase, C-terminal(IPR016163)	no|up	no|down	no|up	yes|up	1
MsG0480019210.01	GTP binding domain(IPR006073)|Pectinesterase inhibitor domain(IPR006501)|GTP-binding protein, orthogonal bundle domain superfamily(IPR023179)|P-loop containing nucleoside triphosphate hydrolase(IPR027417)|Invertase/pectin methylesterase inhibitor domain superfamily(IPR035513)	no|down	yes|down	no|down	no|down	1
MsG0880042541.01	GTP cyclohydrolase I domain(IPR020602)	no|down	no|down	no|down	yes|down	1
MsG0180001271.01	Guanine nucleotide binding protein (G-protein), alpha subunit(IPR001019)|G protein alpha subunit, helical insertion(IPR011025)|P-loop containing nucleoside triphosphate hydrolase(IPR027417)	yes|up	yes|up	yes|up	no|up	3
MsG0180003911.01	Guanylate-binding protein/Atlastin, C-terminal(IPR003191)|Guanylate-binding protein, N-terminal(IPR015894)|P-loop containing nucleoside triphosphate hydrolase(IPR027417)|Guanylate-binding protein, C-terminal domain superfamily(IPR036543)	no|down	no|down	yes|down	yes|down	2
MsG0180004734.01	HAD hydrolase, subfamily IA(IPR006439)|HAD superfamily(IPR023214)|HAD-like superfamily(IPR036412)	no|up	yes|up	no|up	no|up	1
MsG0180004738.01	HAD hydrolase, subfamily IA(IPR006439)|HAD superfamily(IPR023214)|HAD-like superfamily(IPR036412)	no|up	yes|up	no|up	no|up	1
MsG0280008102.01	HAD hydrolase, subfamily IA(IPR006439)|HAD-superfamily hydrolase, subfamily IA, REG-2-like(IPR011949)|HAD superfamily(IPR023214)|HAD-like superfamily(IPR036412)	no|up	no|up	yes|up	yes|up	2
MsG0780038386.01	HAD hydrolase, subfamily IA(IPR006439)|Late nodulin(IPR009810)|Heat shock protein 70 family(IPR013126)|Heat shock protein 70, conserved site(IPR018181)|HAD superfamily(IPR023214)|Domain of unknown function DUF4283(IPR025558)|Zinc knuckle CX2CX4HX4C(IPR025836)|Heat shock protein 70kD, peptide-binding domain superfamily(IPR029047)|Heat shock protein 70kD, C-terminal domain superfamily(IPR029048)|HA…	no|up	yes|up	yes|up	no|up	2
MsG0580024616.01	HAD hydrolase, subfamily IA(IPR006439)|Phosphoglycolate phosphatase-like, domain 2(IPR023198)|HAD superfamily(IPR023214)|HAD-like superfamily(IPR036412)	no|down	no|up	yes|up	yes|up	2
MsG0480023264.01	HAD hydrolase, subfamily IA(IPR006439)|Phosphoglycolate phosphatase-like, domain 2(IPR023198)|HAD superfamily(IPR023214)|HAD-like superfamily(IPR036412)	no|up	yes|up	no|up	no|down	1
MsG0180005624.01	HAD hydrolase, subfamily IA(IPR006439)|Pyrimidine 5-nucleotidase(IPR010237)|HAD superfamily(IPR023214)|HAD-like superfamily(IPR036412)	no|down	yes|down	yes|down	yes|down	3
MsG0180003292.01	HAD superfamily(IPR023214)|HAD-like superfamily(IPR036412)	no|down	yes|down	no|down	no|down	1
MsG0880047557.01	HAD-superfamily hydrolase, subfamily IG, 5'-nucleotidase(IPR008380)|HAD superfamily(IPR023214)|HAD-like superfamily(IPR036412)	no|up	yes|up	no|up	no|up	1
MsG0080048563.01	Haem oxygenase-like(IPR016053)|Haem oxygenase-like, multi-helical(IPR016084)|Haem oxygenase (decyclizing), plant(IPR016951)	no|down	yes|down	yes|down	no|down	2
MsG0280010617.01	Haem peroxidase(IPR010255)	no|up	no|up	no|down	yes|down	1
MsG0680030613.01	Haem peroxidase(IPR010255)|Haem peroxidase, animal type(IPR019791)|Alpha-dioxygenase(IPR034815)|Haem peroxidase domain superfamily, animal type(IPR037120)	no|up	no|down	no|up	yes|up	1
MsG0680030615.01	Haem peroxidase(IPR010255)|Haem peroxidase, animal type(IPR019791)|Alpha-dioxygenase(IPR034815)|Haem peroxidase domain superfamily, animal type(IPR037120)	no|up	no|down	yes|up	yes|up	2
MsG0180003604.01	Haem peroxidase, plant/fungal/bacterial(IPR002016)|Haem peroxidase(IPR010255)	no|up	no|down	no|down	yes|down	1
MsG0180003102.01	Haem peroxidase, plant/fungal/bacterial(IPR002016)|Haem peroxidase(IPR010255)	no|up	no|down	no|down	yes|down	1
MsG0180002199.01	Haemerythrin-like(IPR012312)	no|down	no|down	yes|down	no|down	1
MsG0280006622.01	HAT (Half-A-TPR) repeat(IPR003107)|Tetratricopeptide-like helical domain superfamily(IPR011990)	yes|up	yes|up	yes|up	yes|up	4
MsG0680033612.01	Heat shock factor (HSF)-type, DNA-binding(IPR000232)|Winged helix-like DNA-binding domain superfamily(IPR036388)|Winged helix DNA-binding domain superfamily(IPR036390)	no|up	yes|up	no|up	no|up	1
MsG0580024826.01	Heat shock factor (HSF)-type, DNA-binding(IPR000232)|Winged helix-like DNA-binding domain superfamily(IPR036388)|Winged helix DNA-binding domain superfamily(IPR036390)	yes|up	yes|up	yes|up	no|up	3
MsG0180003410.01	Heat shock factor (HSF)-type, DNA-binding(IPR000232)|Winged helix-like DNA-binding domain superfamily(IPR036388)|Winged helix DNA-binding domain superfamily(IPR036390)	no|up	yes|down	no|down	no|down	1
MsG0480022400.01	Heat shock factor (HSF)-type, DNA-binding(IPR000232)|Winged helix-like DNA-binding domain superfamily(IPR036388)|Winged helix DNA-binding domain superfamily(IPR036390)	no|up	no|down	yes|down	no|down	1
MsG0780036951.01	Heat shock protein 70 family(IPR013126)|Heat shock protein 70, conserved site(IPR018181)|Heat shock protein 70kD, peptide-binding domain superfamily(IPR029047)|Heat shock protein 70kD, C-terminal domain superfamily(IPR029048)	no|up	yes|up	yes|up	no|up	2
MsG0680031848.01	Heat shock protein 70 family(IPR013126)|Heat shock protein 70, conserved site(IPR018181)|Heat shock protein 70kD, peptide-binding domain superfamily(IPR029047)|Heat shock protein 70kD, C-terminal domain superfamily(IPR029048)	yes|up	yes|up	no|up	no|down	2
MsG0480020941.01	Heat shock protein 70 family(IPR013126)|Heat shock protein 70, conserved site(IPR018181)|Heat shock protein 70kD, peptide-binding domain superfamily(IPR029047)|Heat shock protein 70kD, C-terminal domain superfamily(IPR029048)	no|up	yes|up	yes|up	no|up	2
MsG0780036966.01	Heat shock protein 70 family(IPR013126)|Heat shock protein 70, conserved site(IPR018181)|Heat shock protein 70kD, peptide-binding domain superfamily(IPR029047)|Heat shock protein 70kD, C-terminal domain superfamily(IPR029048)	yes|up	yes|up	yes|up	yes|up	4
MsG0780036953.01	Heat shock protein 70 family(IPR013126)|Heat shock protein 70, conserved site(IPR018181)|Heat shock protein 70kD, peptide-binding domain superfamily(IPR029047)|Heat shock protein 70kD, C-terminal domain superfamily(IPR029048)	no|up	yes|up	no|up	yes|up	2
MsG0480020939.01	Heat shock protein 70 family(IPR013126)|Heat shock protein 70kD, C-terminal domain superfamily(IPR029048)	no|up	yes|up	yes|up	yes|up	3
MsG0380014138.01	Heat shock protein 70 family(IPR013126)|Heat shock protein 70kD, peptide-binding domain superfamily(IPR029047)	no|up	yes|up	no|up	yes|up	2
MsG0680032925.01	Heat shock protein Hsp90 family(IPR001404)|Histidine kinase/HSP90-like ATPase(IPR003594)|Heat shock protein Hsp90, conserved site(IPR019805)|Ribosomal protein S5 domain 2-type fold(IPR020568)|Heat shock protein Hsp90, N-terminal(IPR020575)|Histidine kinase/HSP90-like ATPase superfamily(IPR036890)|HSP90, C-terminal domain(IPR037196)	no|up	yes|up	no|up	no|up	1
MsG0580026921.01	Heat shock protein Hsp90 family(IPR001404)|Histidine kinase/HSP90-like ATPase(IPR003594)|Heat shock protein Hsp90, conserved site(IPR019805)|Ribosomal protein S5 domain 2-type fold(IPR020568)|Heat shock protein Hsp90, N-terminal(IPR020575)|Histidine kinase/HSP90-like ATPase superfamily(IPR036890)|HSP90, C-terminal domain(IPR037196)	no|up	no|up	no|up	yes|up	1
MsG0280007505.01	Heavy metal-associated domain superfamily(IPR036163)	no|up	yes|up	yes|up	yes|up	3
MsG0780038176.01	Heavy metal-associated domain, HMA(IPR006121)	no|up	yes|up	no|up	no|up	1
MsG0580024216.01	Heavy metal-associated domain, HMA(IPR006121)|Glycoside hydrolase superfamily(IPR017853)|Glycoside hydrolase, family 35, conserved site(IPR019801)|Glycoside hydrolase 35, catalytic domain(IPR031330)	yes|up	no|up	no|up	yes|up	2
MsG0180005841.01	Heavy metal-associated domain, HMA(IPR006121)|Heavy metal-associated domain superfamily(IPR036163)	no|down	yes|down	yes|down	yes|down	3
MsG0380016321.01	Heavy metal-associated domain, HMA(IPR006121)|Heavy metal-associated domain superfamily(IPR036163)	yes|up	yes|up	no|up	no|down	2
MsG0880043572.01	Heavy metal-associated domain, HMA(IPR006121)|Heavy metal-associated domain superfamily(IPR036163)	no|up	yes|up	no|up	no|down	1
MsG0180004384.01	Heavy metal-associated domain, HMA(IPR006121)|Heavy metal-associated domain superfamily(IPR036163)	no|up	yes|down	no|down	no|down	1
MsG0480023596.01	Heavy metal-associated domain, HMA(IPR006121)|Heavy metal-associated domain superfamily(IPR036163)	no|down	no|down	yes|down	no|down	1
MsG0480022433.01	Heavy metal-associated domain, HMA(IPR006121)|Heavy metal-associated domain superfamily(IPR036163)	no|up	no|up	yes|up	no|up	1
MsG0880043585.01	Heavy metal-associated domain, HMA(IPR006121)|Heavy metal-associated domain superfamily(IPR036163)	no|up	yes|up	no|up	no|up	1
MsG0880047080.01	Heavy metal-associated domain, HMA(IPR006121)|Heavy metal-associated domain superfamily(IPR036163)	no|up	no|down	yes|down	yes|down	2
MsG0480020739.01	Heavy metal-associated domain, HMA(IPR006121)|Heavy metal-associated domain superfamily(IPR036163)	yes|up	yes|up	no|up	no|down	2
MsG0180003510.01	Heavy metal-associated domain, HMA(IPR006121)|Heavy metal-associated domain superfamily(IPR036163)	no|down	no|down	yes|down	no|down	1
MsG0580029276.01	Heavy metal-associated domain, HMA(IPR006121)|Heavy metal-associated domain superfamily(IPR036163)	no|up	no|up	yes|up	yes|up	2
MsG0680035627.01	Heavy metal-associated domain, HMA(IPR006121)|Heavy metal-associated domain superfamily(IPR036163)	no|down	no|down	yes|down	yes|down	2
MsG0380015633.01	Heavy metal-associated domain, HMA(IPR006121)|Heavy metal-associated domain superfamily(IPR036163)	no|up	yes|up	yes|up	no|up	2
MsG0680032899.01	Heavy metal-associated domain, HMA(IPR006121)|Heavy metal-associated domain superfamily(IPR036163)	yes|up	yes|up	yes|up	no|up	3
MsG0180001099.01	Heavy metal-associated domain, HMA(IPR006121)|Heavy metal-associated domain superfamily(IPR036163)	no|up	yes|up	yes|up	yes|up	3
MsG0680032896.01	Heavy metal-associated domain, HMA(IPR006121)|Heavy metal-associated domain superfamily(IPR036163)	no|up	yes|up	no|up	no|up	1
MsG0880042059.01	Heavy metal-associated domain, HMA(IPR006121)|Heavy metal-associated domain superfamily(IPR036163)	yes|up	yes|up	yes|up	yes|up	4
MsG0380016966.01	Heavy metal-associated domain, HMA(IPR006121)|Heavy metal-associated domain superfamily(IPR036163)	no|down	yes|down	no|down	no|down	1
MsG0280010830.01	Heavy metal-associated domain, HMA(IPR006121)|Heavy metal-associated domain superfamily(IPR036163)	no|down	no|down	no|down	yes|down	1
MsG0380016335.01	Heavy metal-associated domain, HMA(IPR006121)|Heavy metal-associated domain superfamily(IPR036163)	yes|up	yes|up	no|up	no|down	2
MsG0480018414.01	Helicase, C-terminal(IPR001650)|AAA+ ATPase domain(IPR003593)|Sec63 domain(IPR004179)|DEAD/DEAH box helicase domain(IPR011545)|Helicase superfamily 1/2, ATP-binding domain(IPR014001)|Immunoglobulin E-set(IPR014756)|P-loop containing nucleoside triphosphate hydrolase(IPR027417)|C2 domain superfamily(IPR035892)|Winged helix DNA-binding domain superfamily(IPR036390)	no|down	yes|down	no|down	no|down	1
MsG0480020388.01	Helicase, C-terminal(IPR001650)|DEAD/DEAH box helicase domain(IPR011545)|Helicase superfamily 1/2, ATP-binding domain(IPR014001)|P-loop containing nucleoside triphosphate hydrolase(IPR027417)	no|down	no|up	no|up	yes|up	1
MsG0680034132.01	Helicase, C-terminal(IPR001650)|DNA/RNA helicase, ATP-dependent, DEAH-box type, conserved site(IPR002464)|Helicase-associated domain(IPR007502)|DEAD/DEAH box helicase domain(IPR011545)|Domain of unknown function DUF1605(IPR011709)|Helicase superfamily 1/2, ATP-binding domain(IPR014001)|P-loop containing nucleoside triphosphate hydrolase(IPR027417)	no|down	yes|down	no|down	no|down	1
MsG0180000538.01	Helicase, C-terminal(IPR001650)|DNA/RNA helicase, ATP-dependent, DEAH-box type, conserved site(IPR002464)|Helicase-associated domain(IPR007502)|Domain of unknown function DUF1605(IPR011709)|Helicase superfamily 1/2, ATP-binding domain(IPR014001)|P-loop containing nucleoside triphosphate hydrolase(IPR027417)	no|down	yes|down	yes|down	yes|down	3
MsG0580029783.01	Helicase, C-terminal(IPR001650)|P-loop containing nucleoside triphosphate hydrolase(IPR027417)	no|up	no|up	no|up	yes|up	1
MsG0880043930.01	Helicase-associated domain(IPR007502)|Domain of unknown function DUF1605(IPR011709)|Helicase superfamily 1/2, ATP-binding domain(IPR014001)|P-loop containing nucleoside triphosphate hydrolase(IPR027417)|Leucine-rich repeat domain superfamily(IPR032675)	no|down	no|up	no|up	yes|up	1
MsG0480022305.01	Helix-loop-helix DNA-binding domain superfamily(IPR036638)	no|up	yes|up	no|up	no|up	1
MsG0180005525.01	Helix-loop-helix DNA-binding domain superfamily(IPR036638)	no|up	no|up	yes|up	no|up	1
MsG0480018295.01	Helix-loop-helix DNA-binding domain superfamily(IPR036638)	no|up	no|down	no|up	yes|up	1
MsG0880045185.01	Helix-loop-helix DNA-binding domain superfamily(IPR036638)	yes|up	yes|up	yes|up	no|down	3
MsG0580024938.01	Helix-turn-helix motif(IPR000047)|Homeobox domain(IPR001356)|Homeobox-like domain superfamily(IPR009057)|Homeobox, conserved site(IPR017970)	no|down	yes|down	no|down	no|up	1
MsG0580024936.01	Helix-turn-helix motif(IPR000047)|Homeobox domain(IPR001356)|Homeobox-like domain superfamily(IPR009057)|Homeobox, conserved site(IPR017970)	yes|down	yes|down	yes|down	yes|down	4
MsG0580024545.01	Helix-turn-helix motif(IPR000047)|Homeobox domain(IPR001356)|Leucine zipper, homeobox-associated(IPR003106)|HD-ZIP protein, N-terminal(IPR006712)|Homeobox-like domain superfamily(IPR009057)|Homeobox, conserved site(IPR017970)	no|down	no|down	yes|down	yes|down	2
MsG0880046129.01	Helix-turn-helix motif(IPR000047)|Homeobox domain(IPR001356)|Leucine zipper, homeobox-associated(IPR003106)|HD-ZIP protein, N-terminal(IPR006712)|Homeobox-like domain superfamily(IPR009057)|Homeobox, conserved site(IPR017970)	no|up	no|up	no|down	yes|down	1
MsG0380016624.01	Helix-turn-helix motif(IPR000047)|Homeobox domain(IPR001356)|Leucine zipper, homeobox-associated(IPR003106)|Homeobox-like domain superfamily(IPR009057)|Homeobox, conserved site(IPR017970)	no|up	no|down	no|up	yes|up	1
MsG0380015936.01	Helix-turn-helix motif(IPR000047)|Homeobox domain(IPR001356)|Leucine zipper, homeobox-associated(IPR003106)|Homeobox-like domain superfamily(IPR009057)|Homeobox, conserved site(IPR017970)	no|up	no|up	yes|up	yes|up	2
MsG0380016581.01	Helix-turn-helix motif(IPR000047)|Homeobox domain(IPR001356)|Leucine zipper, homeobox-associated(IPR003106)|Homeobox-like domain superfamily(IPR009057)|Homeobox, conserved site(IPR017970)	no|up	yes|up	yes|up	yes|up	3
MsG0180002603.01	Hemopexin-like domain superfamily(IPR036375)	yes|down	yes|down	yes|down	yes|down	4
MsG0680032942.01	Hemopexin-like domain superfamily(IPR036375)	no|down	no|down	yes|down	yes|down	2
MsG0680032836.01	Hemopexin-like domain superfamily(IPR036375)	no|up	no|up	no|up	yes|down	1
MsG0180003600.01	Hemopexin-like repeats(IPR018487)|Hemopexin-like domain superfamily(IPR036375)	yes|down	yes|down	yes|down	yes|down	4
MsG0680032932.01	Hemopexin-like repeats(IPR018487)|Hemopexin-like domain superfamily(IPR036375)	no|up	no|down	yes|down	yes|down	2
MsG0580029950.01	Hexapeptide repeat(IPR001451)|Serine O-acetyltransferase(IPR005881)|Serine acetyltransferase, N-terminal(IPR010493)|Trimeric LpxA-like superfamily(IPR011004)|Hexapeptide transferase, conserved site(IPR018357)	no|up	no|down	no|up	yes|up	1
MsG0480021690.01	Hexapeptide repeat(IPR001451)|Serine O-acetyltransferase(IPR005881)|Serine acetyltransferase, N-terminal(IPR010493)|Trimeric LpxA-like superfamily(IPR011004)|Hexapeptide transferase, conserved site(IPR018357)	no|down	yes|down	no|up	yes|up	2
MsG0380014467.01	Hexapeptide repeat(IPR001451)|Serine O-acetyltransferase(IPR005881)|Serine acetyltransferase, N-terminal(IPR010493)|Trimeric LpxA-like superfamily(IPR011004)|Hexapeptide transferase, conserved site(IPR018357)	yes|down	yes|down	no|up	no|up	2
MsG0880043063.01	Hexapeptide repeat(IPR001451)|Serine O-acetyltransferase(IPR005881)|Serine acetyltransferase, N-terminal(IPR010493)|Trimeric LpxA-like superfamily(IPR011004)|Hexapeptide transferase, conserved site(IPR018357)	no|up	no|up	yes|up	yes|up	2
MsG0180003513.01	Hexokinase, binding site(IPR019807)|Hexokinase, N-terminal(IPR022672)	no|down	no|up	yes|up	no|up	1
MsG0580028927.01	High mobility group protein HMGA(IPR000116)|Linker histone H1/H5, domain H15(IPR005818)|AT hook, DNA-binding motif(IPR017956)|Winged helix-like DNA-binding domain superfamily(IPR036388)|Winged helix DNA-binding domain superfamily(IPR036390)	no|down	no|down	yes|down	yes|down	2
MsG0780041333.01	Histidine kinase/HSP90-like ATPase(IPR003594)|Signal transduction histidine kinase, dimerisation/phosphoacceptor domain(IPR003661)|Signal transduction histidine kinase-related protein, C-terminal(IPR004358)|Signal transduction histidine kinase, dimerisation/phosphoacceptor domain superfamily(IPR036097)|Histidine kinase/HSP90-like ATPase superfamily(IPR036890)	no|up	no|up	no|up	yes|up	1
MsG0580028316.01	Histidine phosphatase superfamily, clade-1(IPR013078)|Histidine phosphatase superfamily(IPR029033)	no|down	no|down	no|up	yes|up	1
MsG0680030719.01	Histidine phosphatase superfamily, clade-2(IPR000560)|Domain of unknown function DUF569(IPR007679)|Protein kinase-like domain superfamily(IPR011009)|P-type ATPase, cytoplasmic domain N(IPR023299)|Histidine phosphatase superfamily(IPR029033)|Histidine acid phosphatase active site(IPR033379)|FAD/NAD(P)-binding domain superfamily(IPR036188)	no|down	yes|down	no|down	yes|down	2
MsG0380015085.01	Histidine triad (HIT) protein(IPR001310)|Histidine triad, conserved site(IPR019808)|HIT-like superfamily(IPR036265)	no|up	no|up	no|up	yes|up	1
MsG0380017761.01	Histone deacetylase complex subunit SAP30, Sin3 binding domain(IPR025718)|SAP30, C-terminal domain superfamily(IPR038291)	no|down	yes|down	no|down	no|down	1
MsG0480021048.01	Histone H2A(IPR002119)|Histone H2A/H2B/H3(IPR007125)|Histone-fold(IPR009072)|Histone H2A, C-terminal domain(IPR032454)|Histone H2A conserved site(IPR032458)	no|down	no|up	no|down	yes|down	1
MsG0280011013.01	Histone H2A(IPR002119)|Histone H2A/H2B/H3(IPR007125)|Histone-fold(IPR009072)|Histone H2A, C-terminal domain(IPR032454)|Histone H2A conserved site(IPR032458)	no|down	yes|down	no|down	yes|down	2
MsG0180003711.01	Histone H2B(IPR000558)|Histone H2A/H2B/H3(IPR007125)|Histone-fold(IPR009072)	no|up	yes|up	yes|up	no|up	2
MsG0180003688.01	Histone H2B(IPR000558)|Histone H2A/H2B/H3(IPR007125)|Histone-fold(IPR009072)	yes|down	no|down	no|up	no|down	1
MsG0880044881.01	Histone H3/CENP-A(IPR000164)|Histone H2A/H2B/H3(IPR007125)|Histone-fold(IPR009072)	no|down	no|down	no|down	yes|down	1
MsG0480023687.01	Histone H3/CENP-A(IPR000164)|Histone H2A/H2B/H3(IPR007125)|Histone-fold(IPR009072)	no|down	no|down	no|down	yes|down	1
MsG0780041535.01	Histone H4(IPR001951)|Histone-fold(IPR009072)|Histone H4, conserved site(IPR019809)|CENP-T/Histone H4, histone fold(IPR035425)	no|down	no|down	yes|down	no|down	1
MsG0280010980.01	Histone H4(IPR001951)|Histone-fold(IPR009072)|RmlC-like jelly roll fold(IPR014710)|Histone H4, conserved site(IPR019809)|CENP-T/Histone H4, histone fold(IPR035425)	no|down	no|down	yes|down	yes|down	2
MsG0480022142.01	Homeobox domain(IPR001356)|Homeobox-like domain superfamily(IPR009057)	no|down	yes|down	yes|down	no|down	2
MsG0580029156.01	Homeobox domain(IPR001356)|Homeobox-like domain superfamily(IPR009057)	no|up	yes|down	no|down	yes|down	2
MsG0380017248.01	Homeobox domain(IPR001356)|Leucine zipper, homeobox-associated(IPR003106)|Homeobox-like domain superfamily(IPR009057)|Homeobox, conserved site(IPR017970)	no|up	yes|up	yes|up	yes|up	3
MsG0180000372.01	Homeobox domain(IPR001356)|Leucine zipper, homeobox-associated(IPR003106)|Homeobox-like domain superfamily(IPR009057)|Homeobox, conserved site(IPR017970)	no|down	yes|down	no|down	no|down	1
MsG0380017802.01	Homeobox domain(IPR001356)|POX domain(IPR006563)|Homeobox KN domain(IPR008422)|Homeobox-like domain superfamily(IPR009057)	no|down	no|up	yes|up	no|up	1
MsG0480018883.01	Homeobox domain(IPR001356)|POX domain(IPR006563)|Homeobox KN domain(IPR008422)|Homeobox-like domain superfamily(IPR009057)	no|down	yes|down	no|down	no|down	1
MsG0880043290.01	Homeobox domain(IPR001356)|START domain(IPR002913)|Homeobox-like domain superfamily(IPR009057)|Homeobox, conserved site(IPR017970)	no|down	no|down	no|down	yes|down	1
MsG0580025449.01	Homeobox domain(IPR001356)|START domain(IPR002913)|Homeobox-like domain superfamily(IPR009057)|Homeobox, conserved site(IPR017970)	no|up	yes|up	no|up	no|up	1
MsG0880042391.01	Homeobox domain(IPR001356)|START domain(IPR002913)|Homeobox-like domain superfamily(IPR009057)|START-like domain superfamily(IPR023393)	no|down	no|down	yes|down	no|down	1
MsG0880043255.01	Homeobox-like domain superfamily(IPR009057)	yes|up	no|up	yes|up	yes|up	3
MsG0680034750.01	Homeodomain, ZF-HD class(IPR006455)|ZF-HD homeobox protein, Cys/His-rich dimerisation domain(IPR006456)|Homeobox-like domain superfamily(IPR009057)	no|up	no|up	yes|up	yes|up	2
MsG0180005586.01	Homocysteine-binding domain(IPR003726)|Homocysteine-binding domain superfamily(IPR036589)	no|down	no|up	no|up	yes|up	1
MsG0580026732.01	Homologous-pairing protein 2(IPR010776)|Winged helix-like DNA-binding domain superfamily(IPR036388)	no|up	no|up	yes|up	no|up	1
MsG0280011262.01	HPT domain superfamily(IPR036641)	no|down	yes|up	yes|up	yes|up	3
MsG0380015117.01	HRDC domain(IPR002121)|HRDC-like superfamily(IPR010997)|Helicase Helix-turn-helix domain(IPR029491)	no|down	no|up	yes|up	no|up	1
MsG0780040722.01	HR-like lesion-inducer(IPR008637)	no|down	yes|down	yes|down	no|down	2
MsG0380015450.01	Hs1pro-1, C-terminal(IPR009743)|Nematode resistance protein-like HSPRO1, N-terminal(IPR009869)|Tryptophan/Indoleamine 2,3-dioxygenase-like(IPR037217)	no|up	yes|up	no|up	no|up	1
MsG0380016031.01	Hydrophobic seed protein(IPR027923)|Bifunctional inhibitor/plant lipid transfer protein/seed storage helical domain superfamily(IPR036312)	no|up	no|up	no|up	yes|up	1
MsG0180004606.01	Hypoxia induced protein, domain(IPR007667)	no|up	no|up	no|up	yes|up	1
MsG0880046353.01	Hypoxia induced protein, domain(IPR007667)	no|up	no|up	yes|up	yes|up	2
MsG0580029544.01	Immunoglobulin-like fold(IPR013783)|Immunoglobulin E-set(IPR014756)|AMP-activated protein kinase, glycogen-binding domain(IPR032640)	no|down	yes|down	yes|down	no|down	2
MsG0780041103.01	Inosine/uridine-preferring nucleoside hydrolase domain(IPR001910)|Ribonucleoside hydrolase-like(IPR036452)	no|down	no|down	yes|down	no|down	1
MsG0480022482.01	Inositol monophosphatase-like(IPR000760)|Inositol monophosphatase, conserved site(IPR020550)	no|up	no|up	no|up	yes|up	1
MsG0280006605.01	Inositol monophosphatase-like(IPR000760)|Inositol monophosphatase, metal-binding site(IPR020583)	no|down	yes|down	no|down	yes|down	2
MsG0880042495.01	Inositol oxygenase(IPR007828)	no|down	no|down	yes|down	no|down	1
MsG0580026645.01	Inositol oxygenase(IPR007828)	no|down	yes|down	yes|down	yes|down	3
MsG0580026644.01	Inositol oxygenase(IPR007828)	no|down	yes|down	yes|down	yes|down	3
MsG0180003953.01	Inositol polyphosphate-related phosphatase(IPR000300)|Endonuclease/exonuclease/phosphatase superfamily(IPR036691)	no|down	no|down	no|down	yes|down	1
MsG0880046067.01	Inositol polyphosphate-related phosphatase(IPR000300)|Endonuclease/exonuclease/phosphatase(IPR005135)|Endonuclease/exonuclease/phosphatase superfamily(IPR036691)	no|up	no|up	no|down	yes|down	1
MsG0680034705.01	Inositol polyphosphate-related phosphatase(IPR000300)|Endonuclease/exonuclease/phosphatase(IPR005135)|Endonuclease/exonuclease/phosphatase superfamily(IPR036691)	no|up	no|up	yes|up	yes|up	2
MsG0680030680.01	Inositol polyphosphate-related phosphatase(IPR000300)|Endonuclease/exonuclease/phosphatase(IPR005135)|Endonuclease/exonuclease/phosphatase superfamily(IPR036691)	no|up	no|up	yes|up	no|up	1
MsG0480022889.01	Inositol polyphosphate-related phosphatase(IPR000300)|Endonuclease/exonuclease/phosphatase(IPR005135)|Endonuclease/exonuclease/phosphatase superfamily(IPR036691)	no|down	no|down	yes|down	no|down	1
MsG0180004385.01	Inositol polyphosphate-related phosphatase(IPR000300)|Endonuclease/exonuclease/phosphatase(IPR005135)|WD40/YVTN repeat-like-containing domain superfamily(IPR015943)|WD40-repeat-containing domain superfamily(IPR036322)|Endonuclease/exonuclease/phosphatase superfamily(IPR036691)	no|up	no|down	no|up	yes|up	1
MsG0580024076.01	Inositol-tetrakisphosphate 1-kinase(IPR008656)	no|down	yes|down	yes|down	yes|down	3
MsG0180005731.01	Inositol-tetrakisphosphate 1-kinase(IPR008656)	no|down	yes|down	no|down	no|down	1
MsG0180005729.01	Inositol-tetrakisphosphate 1-kinase(IPR008656)	no|down	yes|down	yes|down	no|down	2
MsG0680032613.01	Ionotropic glutamate receptor(IPR001320)|Solute-binding protein family 3/N-terminal domain of MltF(IPR001638)	no|up	no|down	yes|down	no|down	1
MsG0580027531.01	Ionotropic glutamate receptor(IPR001320)|Solute-binding protein family 3/N-terminal domain of MltF(IPR001638)|Periplasmic binding protein-like I(IPR028082)	no|down	no|down	yes|down	no|down	1
MsG0580025215.01	Ionotropic glutamate receptor(IPR001320)|Solute-binding protein family 3/N-terminal domain of MltF(IPR001638)|Receptor, ligand binding region(IPR001828)|Ionotropic glutamate receptor, plant(IPR017103)|Periplasmic binding protein-like I(IPR028082)	no|up	yes|up	yes|up	yes|up	3
MsG0780037924.01	Ionotropic glutamate receptor(IPR001320)|Solute-binding protein family 3/N-terminal domain of MltF(IPR001638)|Receptor, ligand binding region(IPR001828)|Ionotropic glutamate receptor, plant(IPR017103)|Periplasmic binding protein-like I(IPR028082)	no|down	no|down	yes|down	no|down	1
MsG0780037933.01	Ionotropic glutamate receptor(IPR001320)|Solute-binding protein family 3/N-terminal domain of MltF(IPR001638)|Receptor, ligand binding region(IPR001828)|Periplasmic binding protein-like I(IPR028082)	no|up	no|up	yes|down	no|down	1
MsG0680031823.01	IQ motif, EF-hand binding site(IPR000048)	no|down	no|up	no|down	yes|down	1
MsG0180001709.01	IQ motif, EF-hand binding site(IPR000048)	no|down	no|down	yes|down	yes|down	2
MsG0380016181.01	IQ motif, EF-hand binding site(IPR000048)|Ankyrin repeat(IPR002110)|IPT domain(IPR002909)|CG-1 DNA-binding domain(IPR005559)|Immunoglobulin-like fold(IPR013783)|Immunoglobulin E-set(IPR014756)|Ankyrin repeat-containing domain(IPR020683)|P-loop containing nucleoside triphosphate hydrolase(IPR027417)|Ankyrin repeat-containing domain superfamily(IPR036770)	no|down	yes|down	no|down	no|down	1
MsG0280009429.01	IQ motif, EF-hand binding site(IPR000048)|Cytochrome P450(IPR001128)|Myosin head, motor domain(IPR001609)|Dilute domain(IPR002710)|P-loop containing nucleoside triphosphate hydrolase(IPR027417)|Cytochrome P450 superfamily(IPR036396)|Kinesin motor domain superfamily(IPR036961)|Class XI myosin, cargo binding domain(IPR037975)	no|up	no|up	yes|down	yes|down	2
MsG0780041627.01	IQ motif, EF-hand binding site(IPR000048)|Domain of unknown function DUF4005(IPR025064)	no|down	no|down	no|down	yes|down	1
MsG0180002737.01	IQ motif, EF-hand binding site(IPR000048)|Domain of unknown function DUF4005(IPR025064)	no|up	no|down	yes|down	yes|down	2
MsG0880044540.01	IQ motif, EF-hand binding site(IPR000048)|Myosin head, motor domain(IPR001609)|P-loop containing nucleoside triphosphate hydrolase(IPR027417)|Kinesin motor domain superfamily(IPR036961)	no|down	yes|down	yes|down	yes|down	3
MsG0880042595.01	IQ motif, EF-hand binding site(IPR000048)|P-loop containing nucleoside triphosphate hydrolase(IPR027417)	no|down	no|down	no|down	yes|down	1
MsG0480022623.01	Isochorismatase-like(IPR000868)|Isochorismatase-like superfamily(IPR036380)	yes|up	no|down	yes|up	yes|up	3
MsG0080048880.01	Isocitrate lyase(IPR006254)|Pyruvate/Phosphoenolpyruvate kinase-like domain superfamily(IPR015813)|Isocitrate lyase/phosphorylmutase, conserved site(IPR018523)	no|down	no|up	no|up	yes|up	1
MsG0280007427.01	Isopenicillin N synthase-like(IPR027443)	no|up	no|up	yes|up	yes|up	2
MsG0880042002.01	Isopenicillin N synthase-like(IPR027443)	no|up	no|down	yes|up	no|up	1
MsG0180000635.01	Isopenicillin N synthase-like(IPR027443)	no|down	yes|down	yes|down	yes|down	3
MsG0580025960.01	Isopenicillin N synthase-like(IPR027443)	no|no test	yes|up	no|up	no|up	1
MsG0480021102.01	JmjC domain(IPR003347)	no|down	yes|down	yes|down	no|down	2
MsG0580025450.01	JmjC domain(IPR003347)|JmjN domain(IPR003349)|Zinc finger, C5HC2-type(IPR004198)	yes|up	yes|up	no|up	no|down	2
MsG0380016118.01	K Homology domain(IPR004087)|K Homology domain, type 1(IPR004088)|Bifunctional inhibitor/plant lipid transfer protein/seed storage helical domain(IPR016140)|Bifunctional inhibitor/plant lipid transfer protein/seed storage helical domain superfamily(IPR036312)|K Homology domain, type 1 superfamily(IPR036612)	no|up	no|up	yes|up	yes|up	2
MsG0380015099.01	K Homology domain(IPR004087)|K Homology domain, type 1(IPR004088)|STAR protein, homodimerisation region(IPR032377)|K Homology domain, type 1 superfamily(IPR036612)	no|down	no|up	yes|down	yes|down	2
MsG0680031474.01	Kelch repeat type 1(IPR006652)|Kelch-type beta propeller(IPR015915)	no|up	no|up	no|up	yes|up	1
MsG0480023046.01	Kelch repeat type 1(IPR006652)|Kelch-type beta propeller(IPR015915)	no|down	yes|down	yes|down	no|down	2
MsG0280011338.01	Kelch repeat type 1(IPR006652)|Kelch-type beta propeller(IPR015915)|F-box-like domain superfamily(IPR036047)	no|down	yes|down	no|down	no|down	1
MsG0280009654.01	Kelch-type beta propeller(IPR015915)	no|down	no|down	yes|down	no|down	1
MsG0880045030.01	Ketopantoate hydroxymethyltransferase(IPR003700)|Pyruvate/Phosphoenolpyruvate kinase-like domain superfamily(IPR015813)	no|up	no|up	no|up	yes|up	1
MsG0880043108.01	Ketopantoate hydroxymethyltransferase(IPR003700)|Pyruvate/Phosphoenolpyruvate kinase-like domain superfamily(IPR015813)	no|up	no|up	no|up	yes|up	1
MsG0680035350.01	Kinesin motor domain(IPR001752)|Kinesin motor domain, conserved site(IPR019821)|NPK1-activating kinesin-like protein, C-terminal(IPR021881)|P-loop containing nucleoside triphosphate hydrolase(IPR027417)|Kinesin motor domain superfamily(IPR036961)	no|down	no|up	no|down	yes|down	1
MsG0480022992.01	Kinesin motor domain(IPR001752)|Kinesin motor domain, conserved site(IPR019821)|P-loop containing nucleoside triphosphate hydrolase(IPR027417)|Kinesin motor domain superfamily(IPR036961)	no|up	no|down	no|down	yes|down	1
MsG0880046646.01	Kinesin motor domain(IPR001752)|Kinesin motor domain, conserved site(IPR019821)|P-loop containing nucleoside triphosphate hydrolase(IPR027417)|Kinesin motor domain superfamily(IPR036961)	no|down	no|down	no|down	yes|down	1
MsG0480022054.01	Kinesin motor domain(IPR001752)|Kinesin motor domain, conserved site(IPR019821)|P-loop containing nucleoside triphosphate hydrolase(IPR027417)|Kinesin motor domain superfamily(IPR036961)	no|down	no|down	yes|down	yes|down	2
MsG0180004126.01	Kinesin motor domain(IPR001752)|P-loop containing nucleoside triphosphate hydrolase(IPR027417)|Kinesin motor domain superfamily(IPR036961)	no|down	no|up	no|down	yes|down	1
MsG0880045357.01	Knottin, scorpion toxin-like(IPR003614)|Defensin, plant(IPR008176)|Knottin, scorpion toxin-like superfamily(IPR036574)	no|down	no|up	no|up	yes|up	1
MsG0280010228.01	Knottin, scorpion toxin-like(IPR003614)|Defensin, plant(IPR008176)|Knottin, scorpion toxin-like superfamily(IPR036574)	yes|up	yes|up	yes|up	no|up	3
MsG0880041896.01	Lactate/malate dehydrogenase, N-terminal(IPR001236)|Malate dehydrogenase, active site(IPR001252)|Zinc finger, GRF-type(IPR010666)|Malate dehydrogenase, type 2(IPR010945)|Lactate dehydrogenase/glycoside hydrolase, family 4, C-terminal(IPR015955)|Lactate/malate dehydrogenase, C-terminal(IPR022383)|NAD(P)-binding domain superfamily(IPR036291)	no|up	no|down	yes|down	yes|down	2
MsG0880046461.01	Lactate/malate dehydrogenase, N-terminal(IPR001236)|Malate dehydrogenase, type 1(IPR010097)|Lactate dehydrogenase/glycoside hydrolase, family 4, C-terminal(IPR015955)|Lactate/malate dehydrogenase, C-terminal(IPR022383)|NAD(P)-binding domain superfamily(IPR036291)	no|down	yes|up	yes|up	yes|up	3
MsG0780040945.01	L-Aspartase-like(IPR008948)|Phenylalanine ammonia-lyase, shielding domain superfamily(IPR023144)	no|up	no|up	yes|up	no|up	1
MsG0880043099.01	Late embryogenesis abundant protein, LEA-14(IPR004864)	yes|up	yes|up	yes|up	no|up	3
MsG0880042892.01	Late embryogenesis abundant protein, LEA-14(IPR004864)	no|up	no|down	yes|down	no|down	1
MsG0580029518.01	Late embryogenesis abundant protein, LEA-14(IPR004864)	yes|up	yes|up	no|up	no|up	2
MsG0580028758.01	Late embryogenesis abundant protein, LEA-14(IPR004864)	yes|up	yes|up	yes|up	yes|up	4
MsG0580027808.01	Late embryogenesis abundant protein, LEA-14(IPR004864)	yes|up	yes|up	yes|up	yes|up	4
MsG0480020449.01	Late embryogenesis abundant protein, LEA-14(IPR004864)	no|up	yes|up	yes|up	no|up	2
MsG0780041177.01	Late embryogenesis abundant protein, LEA-14(IPR004864)	yes|up	yes|up	yes|up	no|up	3
MsG0580028668.01	Late embryogenesis abundant protein, LEA-14(IPR004864)	no|up	no|up	yes|up	yes|up	2
MsG0480023987.01	Late embryogenesis abundant protein, LEA-14(IPR004864)	no|up	yes|up	no|up	no|up	1
MsG0780041176.01	Late embryogenesis abundant protein, LEA-14(IPR004864)	yes|up	yes|up	no|up	no|up	2
MsG0780041179.01	Late embryogenesis abundant protein, LEA-14(IPR004864)	no|up	yes|up	no|up	no|up	1
MsG0180003274.01	Late embryogenesis abundant protein, LEA-14(IPR004864)	no|up	no|up	yes|up	yes|up	2
MsG0880045879.01	Late embryogenesis abundant protein, LEA-14(IPR004864)	no|down	no|up	no|down	yes|down	1
MsG0180005678.01	Late embryogenesis abundant protein, LEA-14(IPR004864)	no|down	no|down	no|down	yes|down	1
MsG0280006591.01	Late embryogenesis abundant protein, LEA-14(IPR004864)|Domain of unknown function DUF569(IPR007679)|Actin-crosslinking(IPR008999)	no|down	no|down	yes|down	yes|down	2
MsG0780041307.01	Late embryogenesis abundant protein, LEA5-type(IPR004926)	yes|up	yes|up	yes|up	yes|up	4
MsG0580024755.01	Lateral organ boundaries, LOB(IPR004883)	no|down	no|down	yes|down	no|down	1
MsG0780040719.01	Lateral organ boundaries, LOB(IPR004883)	no|down	yes|down	yes|down	yes|down	3
MsG0680030368.01	Lateral organ boundaries, LOB(IPR004883)	no|up	no|down	yes|up	yes|up	2
MsG0180005770.01	Lateral organ boundaries, LOB(IPR004883)	no|down	no|down	yes|down	yes|down	2
MsG0780036060.01	Lateral organ boundaries, LOB(IPR004883)|LOB domain-containing protein(IPR017414)	no|down	no|down	no|up	yes|up	1
MsG0480022177.01	Lecithin(IPR003386)|Alpha/Beta hydrolase fold(IPR029058)	no|down	yes|down	yes|down	yes|down	3
MsG0380017227.01	Lecithin(IPR003386)|Alpha/Beta hydrolase fold(IPR029058)	no|up	yes|up	yes|up	yes|up	3
MsG0480021198.01	Leghaemoglobin(IPR001032)|Globin-like superfamily(IPR009050)|Globin/Protoglobin(IPR012292)	no|up	no|up	yes|up	yes|up	2
MsG0380013595.01	Legume lectin domain(IPR001220)|Concanavalin A-like lectin/glucanase domain superfamily(IPR013320)|Legume lectin(IPR016363)	no|down	no|down	yes|down	yes|down	2
MsG0280006446.01	Legume lectin domain(IPR001220)|DnaJ domain(IPR001623)|Concanavalin A-like lectin/glucanase domain superfamily(IPR013320)|DnaJ domain, conserved site(IPR018253)|Legume lectin, beta chain, Mn/Ca-binding site(IPR019825)|Chaperone J-domain superfamily(IPR036869)	no|up	yes|up	yes|up	no|up	2
MsG0680033905.01	Leucine rich repeat 4(IPR025875)|Leucine-rich repeat domain superfamily(IPR032675)	no|up	no|up	yes|up	no|up	1
MsG0280009359.01	Leucine zipper, homeobox-associated(IPR003106)	no|up	no|up	yes|up	yes|up	2
MsG0280008676.01	Leucine-rich repeat 2(IPR013101)	no|up	no|up	no|up	yes|up	1
MsG0280008246.01	Leucine-rich repeat 3(IPR011713)|Leucine-rich repeat domain superfamily(IPR032675)	no|up	yes|up	yes|up	no|up	2
MsG0480018139.01	Leucine-rich repeat domain superfamily(IPR032675)	yes|up	yes|up	no|up	no|up	2
MsG0380015441.01	Leucine-rich repeat domain superfamily(IPR032675)	no|down	no|down	yes|down	no|down	1
MsG0480018541.01	Leucine-rich repeat domain superfamily(IPR032675)	no|down	no|down	yes|down	no|down	1
MsG0380014954.01	Leucine-rich repeat domain superfamily(IPR032675)	no|up	no|down	yes|up	no|up	1
MsG0180001261.01	Leucine-rich repeat domain superfamily(IPR032675)	no|down	no|down	no|down	yes|down	1
MsG0780039133.01	Leucine-rich repeat domain superfamily(IPR032675)	no|up	no|up	yes|up	no|up	1
MsG0480021976.01	Leucine-rich repeat domain superfamily(IPR032675)	no|down	yes|down	no|down	no|down	1
MsG0780040357.01	Leucine-rich repeat domain superfamily(IPR032675)	no|down	no|down	yes|down	yes|down	2
MsG0680034784.01	Leucine-rich repeat domain superfamily(IPR032675)	no|up	yes|up	yes|up	no|up	2
MsG0580026007.01	Leucine-rich repeat domain superfamily(IPR032675)	no|up	yes|up	no|up	no|down	1
MsG0080048745.01	Leucine-rich repeat domain superfamily(IPR032675)	no|down	no|down	yes|down	yes|down	2
MsG0880047342.01	Leucine-rich repeat domain superfamily(IPR032675)	no|up	yes|up	yes|up	no|up	2
MsG0680034797.01	Leucine-rich repeat domain superfamily(IPR032675)	no|up	yes|up	no|up	no|up	1
MsG0480022512.01	Leucine-rich repeat domain superfamily(IPR032675)	no|down	yes|down	yes|down	no|down	2
MsG0580029690.01	Leucine-rich repeat domain superfamily(IPR032675)	no|down	yes|down	yes|down	yes|down	3
MsG0480021439.01	Leucine-rich repeat domain superfamily(IPR032675)	yes|up	yes|up	yes|up	no|up	3
MsG0280008692.01	Leucine-rich repeat domain superfamily(IPR032675)	no|down	yes|down	yes|down	yes|down	3
MsG0080048608.01	Leucine-rich repeat domain superfamily(IPR032675)	yes|up	yes|up	yes|up	yes|up	4
MsG0780036272.01	Leucine-rich repeat domain superfamily(IPR032675)	yes|up	yes|up	yes|up	no|up	3
MsG0180002090.01	Leucine-rich repeat domain superfamily(IPR032675)	yes|down	yes|down	yes|down	yes|down	4
MsG0380014850.01	Leucine-rich repeat domain superfamily(IPR032675)	yes|down	yes|down	no|down	no|down	2
MsG0180003745.01	Leucine-rich repeat domain superfamily(IPR032675)	yes|up	no|up	yes|up	no|up	2
MsG0380017715.01	Leucine-rich repeat domain superfamily(IPR032675)	no|up	no|down	no|up	yes|up	1
MsG0680035158.01	Leucine-rich repeat domain superfamily(IPR032675)	no|down	yes|up	no|up	no|up	1
MsG0680034634.01	Leucine-rich repeat domain superfamily(IPR032675)	yes|up	yes|up	yes|up	no|up	3
MsG0480022564.01	Leucine-rich repeat domain superfamily(IPR032675)	no|up	no|up	no|up	yes|up	1
MsG0380015672.01	Leucine-rich repeat domain superfamily(IPR032675)	yes|up	yes|up	yes|up	yes|up	4
MsG0880047352.01	Leucine-rich repeat domain superfamily(IPR032675)	no|up	yes|up	yes|up	no|up	2
MsG0880047304.01	Leucine-rich repeat domain superfamily(IPR032675)	no|down	no|up	no|down	yes|down	1
MsG0480021442.01	Leucine-rich repeat domain superfamily(IPR032675)	no|up	yes|up	no|up	no|down	1
MsG0480019671.01	Leucine-rich repeat domain superfamily(IPR032675)|F-box-like domain superfamily(IPR036047)	no|up	no|up	yes|up	no|up	1
MsG0480019673.01	Leucine-rich repeat domain superfamily(IPR032675)|F-box-like domain superfamily(IPR036047)	no|up	no|up	yes|up	no|up	1
MsG0780036904.01	Leucine-rich repeat domain superfamily(IPR032675)|F-box-like domain superfamily(IPR036047)	no|up	no|up	yes|down	no|down	1
MsG0780040494.01	Leucine-rich repeat domain superfamily(IPR032675)|Winged helix DNA-binding domain superfamily(IPR036390)	no|down	yes|down	yes|down	yes|down	3
MsG0180001048.01	Leucine-rich repeat(IPR001611)|F-box domain(IPR001810)|Leucine-rich repeat, cysteine-containing subtype(IPR006553)|Leucine-rich repeat domain superfamily(IPR032675)|F-box-like domain superfamily(IPR036047)	no|down	yes|down	yes|down	yes|down	3
MsG0880046781.01	Leucine-rich repeat(IPR001611)|F-box domain(IPR001810)|Leucine-rich repeat, cysteine-containing subtype(IPR006553)|Leucine-rich repeat domain superfamily(IPR032675)|F-box-like domain superfamily(IPR036047)	no|up	no|up	yes|up	yes|up	2
MsG0580027831.01	Leucine-rich repeat(IPR001611)|Leucine rich repeat 4(IPR025875)|Leucine-rich repeat domain superfamily(IPR032675)	yes|up	yes|up	yes|up	no|up	3
MsG0880046864.01	Leucine-rich repeat(IPR001611)|Leucine-rich repeat domain superfamily(IPR032675)	no|down	yes|down	no|down	no|down	1
MsG0580029341.01	Leucine-rich repeat(IPR001611)|Leucine-rich repeat domain superfamily(IPR032675)	no|down	no|down	no|down	yes|down	1
MsG0480018812.01	Leucine-rich repeat(IPR001611)|Leucine-rich repeat domain superfamily(IPR032675)	yes|up	no|up	no|up	no|up	1
MsG0380013369.01	Leucine-rich repeat(IPR001611)|Leucine-rich repeat domain superfamily(IPR032675)	no|up	no|up	yes|up	no|up	1
MsG0680032261.01	Leucine-rich repeat(IPR001611)|Leucine-rich repeat domain superfamily(IPR032675)	no|up	no|up	no|up	yes|up	1
MsG0580027661.01	Leucine-rich repeat(IPR001611)|Leucine-rich repeat domain superfamily(IPR032675)	yes|up	yes|up	yes|up	yes|up	4
MsG0480018819.01	Leucine-rich repeat(IPR001611)|Leucine-rich repeat domain superfamily(IPR032675)	yes|up	yes|up	yes|up	no|up	3
MsG0480018773.01	Leucine-rich repeat(IPR001611)|Leucine-rich repeat domain superfamily(IPR032675)	yes|up	yes|up	yes|up	no|up	3
MsG0780039135.01	Leucine-rich repeat(IPR001611)|Leucine-rich repeat domain superfamily(IPR032675)	yes|up	yes|up	yes|up	yes|up	4
MsG0580025232.01	Leucine-rich repeat(IPR001611)|Leucine-rich repeat domain superfamily(IPR032675)	no|up	no|up	no|up	yes|up	1
MsG0280006897.01	Leucine-rich repeat(IPR001611)|Leucine-rich repeat domain superfamily(IPR032675)	no|up	yes|up	yes|up	no|up	2
MsG0880046043.01	Leucine-rich repeat(IPR001611)|Leucine-rich repeat domain superfamily(IPR032675)	no|down	yes|down	no|down	no|down	1
MsG0680032264.01	Leucine-rich repeat(IPR001611)|Leucine-rich repeat domain superfamily(IPR032675)	no|down	no|down	no|down	yes|down	1
MsG0580027829.01	Leucine-rich repeat(IPR001611)|Leucine-rich repeat domain superfamily(IPR032675)	yes|up	yes|up	yes|up	yes|up	4
MsG0180002731.01	Leucine-rich repeat(IPR001611)|Leucine-rich repeat domain superfamily(IPR032675)	no|up	no|up	yes|up	no|up	1
MsG0880043104.01	Leucine-rich repeat(IPR001611)|Leucine-rich repeat domain superfamily(IPR032675)	no|up	no|down	no|down	yes|down	1
MsG0280008287.01	Leucine-rich repeat(IPR001611)|Leucine-rich repeat domain superfamily(IPR032675)	yes|down	yes|down	yes|down	yes|down	4
MsG0680032142.01	Leucine-rich repeat(IPR001611)|Leucine-rich repeat domain superfamily(IPR032675)	no|up	no|up	yes|up	yes|up	2
MsG0580029473.01	Leucine-rich repeat(IPR001611)|Leucine-rich repeat domain superfamily(IPR032675)	no|up	no|up	no|up	yes|down	1
MsG0580027830.01	Leucine-rich repeat(IPR001611)|Leucine-rich repeat domain superfamily(IPR032675)	no|up	yes|up	yes|up	no|up	2
MsG0280006951.01	Leucine-rich repeat(IPR001611)|Leucine-rich repeat-containing N-terminal, plant-type(IPR013210)|Ammonium transporter AmtB-like domain(IPR024041)|Ammonium/urea transporter(IPR029020)|Leucine-rich repeat domain superfamily(IPR032675)	no|up	no|up	yes|up	no|up	1
MsG0580027659.01	Leucine-rich repeat(IPR001611)|Leucine-rich repeat-containing N-terminal, plant-type(IPR013210)|Leucine rich repeat 4(IPR025875)|Leucine-rich repeat domain superfamily(IPR032675)	no|up	yes|up	yes|up	no|up	2
MsG0580027828.01	Leucine-rich repeat(IPR001611)|Leucine-rich repeat-containing N-terminal, plant-type(IPR013210)|Leucine rich repeat 4(IPR025875)|Leucine-rich repeat domain superfamily(IPR032675)	yes|up	yes|up	yes|up	yes|up	4
MsG0680031034.01	Leucine-rich repeat(IPR001611)|Leucine-rich repeat-containing N-terminal, plant-type(IPR013210)|Leucine rich repeat 4(IPR025875)|Leucine-rich repeat domain superfamily(IPR032675)	no|down	no|down	no|down	yes|down	1
MsG0480018749.01	Leucine-rich repeat(IPR001611)|Leucine-rich repeat-containing N-terminal, plant-type(IPR013210)|Leucine-rich repeat domain superfamily(IPR032675)	no|up	yes|up	no|up	no|up	1
MsG0680032146.01	Leucine-rich repeat(IPR001611)|Leucine-rich repeat-containing N-terminal, plant-type(IPR013210)|Leucine-rich repeat domain superfamily(IPR032675)	no|up	no|up	yes|up	yes|up	2
MsG0780036899.01	Leucine-rich repeat(IPR001611)|Leucine-rich repeat-containing N-terminal, plant-type(IPR013210)|Leucine-rich repeat domain superfamily(IPR032675)	no|up	no|up	yes|up	yes|up	2
MsG0680032002.01	Leucine-rich repeat(IPR001611)|Leucine-rich repeat-containing N-terminal, plant-type(IPR013210)|Leucine-rich repeat domain superfamily(IPR032675)	no|down	yes|down	no|down	yes|down	2
MsG0680032000.01	Leucine-rich repeat(IPR001611)|Leucine-rich repeat-containing N-terminal, plant-type(IPR013210)|Leucine-rich repeat domain superfamily(IPR032675)	no|down	no|down	no|down	yes|down	1
MsG0380013770.01	Leucine-rich repeat(IPR001611)|Leucine-rich repeat-containing N-terminal, plant-type(IPR013210)|Leucine-rich repeat domain superfamily(IPR032675)	no|up	no|up	yes|up	no|up	1
MsG0680032003.01	Leucine-rich repeat(IPR001611)|Leucine-rich repeat-containing N-terminal, plant-type(IPR013210)|Leucine-rich repeat domain superfamily(IPR032675)	no|down	no|down	no|down	yes|down	1
MsG0480018834.01	Leucine-rich repeat(IPR001611)|Leucine-rich repeat-containing N-terminal, plant-type(IPR013210)|Leucine-rich repeat domain superfamily(IPR032675)	yes|up	yes|up	yes|up	no|up	3
MsG0180005824.01	Leucine-rich repeat(IPR001611)|Leucine-rich repeat-containing N-terminal, plant-type(IPR013210)|Leucine-rich repeat domain superfamily(IPR032675)	no|up	no|up	yes|up	yes|up	2
MsG0380013831.01	Leucine-rich repeat(IPR001611)|Leucine-rich repeat-containing N-terminal, plant-type(IPR013210)|Leucine-rich repeat domain superfamily(IPR032675)	yes|up	no|up	no|up	no|up	1
MsG0380013759.01	Leucine-rich repeat(IPR001611)|Leucine-rich repeat-containing N-terminal, plant-type(IPR013210)|Leucine-rich repeat domain superfamily(IPR032675)	no|up	yes|up	no|up	no|up	1
MsG0780040560.01	Leucine-rich repeat(IPR001611)|Leucine-rich repeat-containing N-terminal, plant-type(IPR013210)|Leucine-rich repeat domain superfamily(IPR032675)	no|up	no|up	yes|down	yes|down	2
MsG0480021091.01	Leucine-rich repeat(IPR001611)|Leucine-rich repeat-containing N-terminal, plant-type(IPR013210)|Leucine-rich repeat domain superfamily(IPR032675)	no|down	no|up	no|down	yes|down	1
MsG0280008786.01	Leucine-rich repeat(IPR001611)|Leucine-rich repeat-containing N-terminal, plant-type(IPR013210)|Leucine-rich repeat domain superfamily(IPR032675)	no|up	no|up	yes|up	yes|up	2
MsG0580027827.01	Leucine-rich repeat(IPR001611)|Leucine-rich repeat-containing N-terminal, plant-type(IPR013210)|Leucine-rich repeat domain superfamily(IPR032675)	yes|up	no|up	no|up	no|up	1
MsG0780036182.01	Leucine-rich repeat(IPR001611)|Leucine-rich repeat-containing N-terminal, plant-type(IPR013210)|Leucine-rich repeat domain superfamily(IPR032675)	no|up	yes|up	no|up	no|up	1
MsG0480018817.01	Leucine-rich repeat(IPR001611)|Leucine-rich repeat-containing N-terminal, plant-type(IPR013210)|Leucine-rich repeat domain superfamily(IPR032675)	no|up	yes|up	no|up	no|up	1
MsG0380013796.01	Leucine-rich repeat(IPR001611)|Leucine-rich repeat-containing N-terminal, plant-type(IPR013210)|Leucine-rich repeat domain superfamily(IPR032675)	no|up	yes|up	yes|up	yes|up	3
MsG0580029012.01	Leucine-rich repeat(IPR001611)|Leucine-rich repeat-containing N-terminal, plant-type(IPR013210)|Leucine-rich repeat domain superfamily(IPR032675)	no|up	no|up	yes|up	no|up	1
MsG0480018842.01	Leucine-rich repeat(IPR001611)|Leucine-rich repeat-containing N-terminal, plant-type(IPR013210)|Leucine-rich repeat domain superfamily(IPR032675)	no|up	yes|up	no|up	no|down	1
MsG0280008779.01	Leucine-rich repeat(IPR001611)|Leucine-rich repeat-containing N-terminal, plant-type(IPR013210)|Leucine-rich repeat domain superfamily(IPR032675)	no|up	yes|up	yes|up	yes|up	3
MsG0780036901.01	Leucine-rich repeat(IPR001611)|Leucine-rich repeat-containing N-terminal, plant-type(IPR013210)|Leucine-rich repeat domain superfamily(IPR032675)	no|up	no|up	yes|up	yes|up	2
MsG0280009033.01	Leucine-rich repeat(IPR001611)|Leucine-rich repeat-containing N-terminal, plant-type(IPR013210)|Leucine-rich repeat domain superfamily(IPR032675)	yes|up	yes|up	yes|up	yes|up	4
MsG0080048513.01	Leucine-rich repeat(IPR001611)|Leucine-rich repeat-containing N-terminal, plant-type(IPR013210)|Leucine-rich repeat domain superfamily(IPR032675)	no|up	no|up	yes|up	no|up	1
MsG0580027832.01	Leucine-rich repeat(IPR001611)|Leucine-rich repeat-containing N-terminal, plant-type(IPR013210)|Leucine-rich repeat domain superfamily(IPR032675)	yes|up	yes|up	yes|up	yes|up	4
MsG0780040076.01	Leucine-rich repeat(IPR001611)|Leucine-rich repeat-containing N-terminal, plant-type(IPR013210)|Leucine-rich repeat domain superfamily(IPR032675)	no|down	no|down	no|down	yes|down	1
MsG0180002092.01	Leucine-rich repeat(IPR001611)|NB-ARC(IPR002182)|AAA+ ATPase domain(IPR003593)|P-loop containing nucleoside triphosphate hydrolase(IPR027417)|Leucine-rich repeat domain superfamily(IPR032675)	yes|down	yes|down	yes|down	yes|down	4
MsG0480022110.01	Leucine-rich repeat(IPR001611)|NB-ARC(IPR002182)|Leucine-rich repeat 3(IPR011713)|P-loop containing nucleoside triphosphate hydrolase(IPR027417)|Leucine-rich repeat domain superfamily(IPR032675)|Winged helix DNA-binding domain superfamily(IPR036390)	no|down	yes|down	no|down	no|down	1
MsG0380012438.01	Leucine-rich repeat(IPR001611)|NB-ARC(IPR002182)|P-loop containing nucleoside triphosphate hydrolase(IPR027417)|Leucine-rich repeat domain superfamily(IPR032675)	yes|up	no|up	no|up	no|up	1
MsG0780036464.01	Leucine-rich repeat(IPR001611)|NB-ARC(IPR002182)|P-loop containing nucleoside triphosphate hydrolase(IPR027417)|Leucine-rich repeat domain superfamily(IPR032675)	no|up	no|up	no|up	yes|up	1
MsG0780036440.01	Leucine-rich repeat(IPR001611)|NB-ARC(IPR002182)|P-loop containing nucleoside triphosphate hydrolase(IPR027417)|Leucine-rich repeat domain superfamily(IPR032675)	no|up	no|up	yes|up	yes|up	2
MsG0580030000.01	Leucine-rich repeat(IPR001611)|Sugar phosphate transporter domain(IPR004853)|Leucine-rich repeat domain superfamily(IPR032675)	no|up	no|down	yes|down	yes|down	2
MsG0580025038.01	Leucine-rich repeat(IPR001611)|Transcription factor, MADS-box(IPR002100)|Transcription factor, K-box(IPR002487)|Leucine-rich repeat domain superfamily(IPR032675)|MADS MEF2-like(IPR033896)|Transcription factor, MADS-box superfamily(IPR036879)	no|down	yes|down	yes|down	yes|down	3
MsG0580029013.01	Leucine-rich repeat(IPR001611)|Zinc finger, CCHC-type(IPR001878)|Leucine-rich repeat-containing N-terminal, plant-type(IPR013210)|Leucine-rich repeat domain superfamily(IPR032675)|Zinc finger, CCHC-type superfamily(IPR036875)	yes|up	no|up	yes|up	no|up	2
MsG0180002020.01	Leucine-rich repeat(IPR001611)|Zinc finger, PHD-type(IPR001965)|Zinc finger, FYVE/PHD-type(IPR011011)|Zinc finger, RING/FYVE/PHD-type(IPR013083)|Leucine-rich repeat domain superfamily(IPR032675)	no|up	no|up	yes|up	yes|up	2
MsG0380014218.01	Leucine-rich repeat-containing N-terminal, plant-type(IPR013210)|Leucine-rich repeat domain superfamily(IPR032675)	no|up	no|up	yes|up	yes|up	2
MsG0580029151.01	Leucine-rich repeat-containing N-terminal, plant-type(IPR013210)|Leucine-rich repeat domain superfamily(IPR032675)	no|down	no|down	no|down	yes|down	1
MsG0580025219.01	Leucine-rich repeat-containing N-terminal, plant-type(IPR013210)|Leucine-rich repeat domain superfamily(IPR032675)	no|up	yes|up	yes|up	no|up	2
MsG0580029486.01	Leucine-rich repeat-containing N-terminal, plant-type(IPR013210)|Leucine-rich repeat domain superfamily(IPR032675)	no|down	yes|down	no|down	no|down	1
MsG0780039096.01	Leucine-rich repeat-containing N-terminal, plant-type(IPR013210)|Leucine-rich repeat domain superfamily(IPR032675)	no|up	yes|up	yes|up	yes|up	3
MsG0380011868.01	Leucine-rich repeat-containing N-terminal, plant-type(IPR013210)|Leucine-rich repeat domain superfamily(IPR032675)	yes|up	no|down	no|up	no|up	1
MsG0480023861.01	Leucine-rich repeat-containing N-terminal, plant-type(IPR013210)|Leucine-rich repeat domain superfamily(IPR032675)	yes|up	yes|up	no|up	no|down	2
MsG0180005636.01	Leucine-rich repeat-containing N-terminal, plant-type(IPR013210)|Malectin-like carbohydrate-binding domain(IPR024788)|Leucine-rich repeat domain superfamily(IPR032675)	yes|up	no|up	no|up	no|up	1
MsG0380015249.01	Linker histone H1/H5, domain H15(IPR005818)|AT hook, DNA-binding motif(IPR017956)|Winged helix-like DNA-binding domain superfamily(IPR036388)|Winged helix DNA-binding domain superfamily(IPR036390)	no|down	no|down	no|down	yes|down	1
MsG0280010464.01	Lipase, GDSL, active site(IPR008265)|SGNH hydrolase superfamily(IPR036514)	no|up	no|up	no|up	yes|up	1
MsG0280008531.01	Lipopolysaccharide-modifying protein(IPR006598)	no|down	no|up	yes|up	no|up	1
MsG0580024404.01	Lipopolysaccharide-modifying protein(IPR006598)	no|down	no|down	yes|up	no|down	1
MsG0880042079.01	Lipoxygenase, plant(IPR001246)|Lipoxygenase, C-terminal(IPR013819)|Lipoxigenase, C-terminal domain superfamily(IPR036226)	no|up	no|up	no|down	yes|down	1
MsG0880042635.01	Lipoxygenase, plant(IPR001246)|Lipoxygenase, C-terminal(IPR013819)|Lipoxygenase, iron binding site(IPR020833)|Lipoxygenase, conserved site(IPR020834)|Lipoxygenase, domain 3(IPR027433)|Lipoxigenase, C-terminal domain superfamily(IPR036226)	no|down	no|up	yes|down	yes|down	2
MsG0880042642.01	Lipoxygenase, plant(IPR001246)|Lipoxygenase, C-terminal(IPR013819)|Lipoxygenase, iron binding site(IPR020833)|Lipoxygenase, conserved site(IPR020834)|Lipoxygenase, domain 3(IPR027433)|Lipoxigenase, C-terminal domain superfamily(IPR036226)	no|down	no|down	yes|down	yes|down	2
MsG0480022935.01	Lipoxygenase, plant(IPR001246)|Lipoxygenase, C-terminal(IPR013819)|Lipoxygenase, iron binding site(IPR020833)|Lipoxygenase, conserved site(IPR020834)|Lipoxygenase, domain 3(IPR027433)|Lipoxigenase, C-terminal domain superfamily(IPR036226)	no|up	yes|down	no|down	no|down	1
MsG0380017490.01	LIS1 homology motif(IPR006594)|WD40/YVTN repeat-like-containing domain superfamily(IPR015943)|Armadillo-type fold(IPR016024)|WD40-repeat-containing domain superfamily(IPR036322)	no|up	no|up	no|up	yes|up	1
MsG0380016532.01	Longin-like domain superfamily(IPR011012)	no|down	no|down	no|down	yes|down	1
MsG0480018345.01	LURP-one-related(IPR007612)|Tubby-like, C-terminal(IPR025659)|LURP-one-related superfamily(IPR038595)	no|up	yes|down	yes|down	yes|down	3
MsG0780039373.01	LURP-one-related(IPR007612)|Tubby-like, C-terminal(IPR025659)|LURP-one-related superfamily(IPR038595)	no|down	yes|down	yes|down	no|down	2
MsG0580027765.01	LURP-one-related(IPR007612)|Tubby-like, C-terminal(IPR025659)|LURP-one-related superfamily(IPR038595)	no|up	yes|up	yes|up	no|up	2
MsG0280011406.01	LURP-one-related(IPR007612)|Tubby-like, C-terminal(IPR025659)|LURP-one-related superfamily(IPR038595)	no|up	no|up	yes|up	yes|up	2
MsG0780041102.01	LysM domain(IPR018392)|LysM domain superfamily(IPR036779)	no|up	yes|up	no|up	no|up	1
MsG0180001293.01	Mad3/Bub1 homology region 1(IPR013212)	no|up	no|up	no|down	yes|down	1
MsG0180003592.01	Magnesium transporter NIPA(IPR008521)	no|up	yes|down	no|up	no|up	1
MsG0580029618.01	Magnesium transporter NIPA(IPR008521)	no|down	no|up	no|down	yes|down	1
MsG0480020755.01	Major facilitator superfamily domain(IPR020846)|MFS transporter superfamily(IPR036259)	yes|down	no|down	no|down	no|down	1
MsG0480020754.01	Major facilitator superfamily(IPR011701)|Major facilitator superfamily domain(IPR020846)|MFS transporter superfamily(IPR036259)	yes|down	no|down	no|down	no|down	1
MsG0380011924.01	Major facilitator superfamily(IPR011701)|Major facilitator superfamily domain(IPR020846)|MFS transporter superfamily(IPR036259)	no|up	no|up	yes|up	yes|up	2
MsG0880043867.01	Major facilitator superfamily(IPR011701)|Major facilitator superfamily domain(IPR020846)|MFS transporter superfamily(IPR036259)	no|up	no|up	no|up	yes|up	1
MsG0380014735.01	Major facilitator superfamily(IPR011701)|Major facilitator superfamily domain(IPR020846)|MFS transporter superfamily(IPR036259)	no|up	yes|up	yes|up	no|up	2
MsG0180006075.01	Major facilitator superfamily(IPR011701)|Major facilitator superfamily domain(IPR020846)|MFS transporter superfamily(IPR036259)	no|down	no|down	yes|down	no|down	1
MsG0880046856.01	Major facilitator superfamily(IPR011701)|Major facilitator superfamily domain(IPR020846)|MFS transporter superfamily(IPR036259)	no|up	yes|up	yes|up	no|up	2
MsG0180005061.01	Major facilitator superfamily(IPR011701)|Major facilitator superfamily domain(IPR020846)|MFS transporter superfamily(IPR036259)|Peptidase S8 propeptide/proteinase inhibitor I9 superfamily(IPR037045)	yes|down	no|down	yes|down	no|down	2
MsG0380016061.01	Major facilitator, sugar transporter-like(IPR005828)|Major facilitator superfamily domain(IPR020846)|MFS transporter superfamily(IPR036259)	no|up	yes|up	no|up	no|down	1
MsG0880043652.01	Major facilitator, sugar transporter-like(IPR005828)|Major facilitator superfamily domain(IPR020846)|MFS transporter superfamily(IPR036259)	no|up	no|up	yes|up	yes|up	2
MsG0480023653.01	Major intrinsic protein(IPR000425)|Aquaporin-like(IPR023271)	no|up	no|up	no|down	yes|down	1
MsG0580024388.01	Major intrinsic protein(IPR000425)|Aquaporin-like(IPR023271)	no|down	no|down	yes|down	yes|down	2
MsG0280011277.01	Major intrinsic protein(IPR000425)|K Homology domain, type 1(IPR004088)|Tetratricopeptide-like helical domain superfamily(IPR011990)|Protein kinase A anchor protein, nuclear localisation signal domain(IPR019510)|Major intrinsic protein, conserved site(IPR022357)|Aquaporin-like(IPR023271)|Pentacotripeptide-repeat region of PRORP(IPR033443)|K Homology domain, type 1 superfamily(IPR036612)	no|down	no|down	yes|down	yes|down	2
MsG0480018608.01	Major intrinsic protein(IPR000425)|Major intrinsic protein, conserved site(IPR022357)|Aquaporin-like(IPR023271)	no|up	no|down	yes|down	no|down	1
MsG0380018055.01	Major intrinsic protein(IPR000425)|Major intrinsic protein, conserved site(IPR022357)|Aquaporin-like(IPR023271)	no|up	no|down	no|down	yes|down	1
MsG0580024535.01	Major intrinsic protein(IPR000425)|Major intrinsic protein, conserved site(IPR022357)|Aquaporin-like(IPR023271)	no|down	yes|down	yes|down	yes|down	3
MsG0780041015.01	Major intrinsic protein(IPR000425)|Major intrinsic protein, conserved site(IPR022357)|Aquaporin-like(IPR023271)	no|down	no|up	yes|down	yes|down	2
MsG0480020797.01	Major intrinsic protein(IPR000425)|Major intrinsic protein, conserved site(IPR022357)|Aquaporin-like(IPR023271)	no|down	no|up	yes|down	yes|down	2
MsG0180002324.01	Major intrinsic protein(IPR000425)|Major intrinsic protein, conserved site(IPR022357)|Aquaporin-like(IPR023271)	no|up	yes|up	yes|up	yes|up	3
MsG0380015447.01	Major intrinsic protein(IPR000425)|Major intrinsic protein, conserved site(IPR022357)|Aquaporin-like(IPR023271)	no|up	no|up	no|down	yes|down	1
MsG0780036261.01	Major intrinsic protein(IPR000425)|Major intrinsic protein, conserved site(IPR022357)|Aquaporin-like(IPR023271)	no|down	no|down	yes|down	yes|down	2
MsG0180002325.01	Major intrinsic protein(IPR000425)|Major intrinsic protein, conserved site(IPR022357)|Aquaporin-like(IPR023271)	no|up	yes|up	no|up	no|up	1
MsG0880042325.01	Major intrinsic protein(IPR000425)|Pex, N-terminal(IPR006845)|Major intrinsic protein, conserved site(IPR022357)|Aquaporin-like(IPR023271)	no|down	no|down	yes|down	yes|down	2
MsG0480020057.01	Major pollen allergen Lol pI(IPR005795)|Expansin/pollen allergen, DPBB domain(IPR007112)|Expansin, cellulose-binding-like domain(IPR007117)|Expansin/Lol pI(IPR007118)|RlpA-like protein, double-psi beta-barrel domain(IPR009009)|Expansin, cellulose-binding-like domain superfamily(IPR036749)|RlpA-like domain superfamily(IPR036908)	no|down	yes|down	yes|down	yes|down	3
MsG0280010721.01	Major pollen allergen Lol pI(IPR005795)|Expansin/pollen allergen, DPBB domain(IPR007112)|Expansin, cellulose-binding-like domain(IPR007117)|Expansin/Lol pI(IPR007118)|RlpA-like protein, double-psi beta-barrel domain(IPR009009)|Expansin, cellulose-binding-like domain superfamily(IPR036749)|RlpA-like domain superfamily(IPR036908)	no|down	yes|up	no|down	yes|down	2
MsG0480021761.01	Major pollen allergen Lol pI(IPR005795)|Expansin/pollen allergen, DPBB domain(IPR007112)|Expansin, cellulose-binding-like domain(IPR007117)|Expansin/Lol pI(IPR007118)|RlpA-like protein, double-psi beta-barrel domain(IPR009009)|Expansin, cellulose-binding-like domain superfamily(IPR036749)|RlpA-like domain superfamily(IPR036908)	no|up	yes|up	yes|up	no|down	2
MsG0680031655.01	Major sperm protein (MSP) domain(IPR000535)|Ankyrin repeat(IPR002110)|PapD-like superfamily(IPR008962)|Immunoglobulin-like fold(IPR013783)|Ankyrin repeat-containing domain(IPR020683)|Ankyrin repeat-containing domain superfamily(IPR036770)	no|up	yes|up	yes|up	yes|up	3
MsG0080048636.01	Malate synthase(IPR001465)|Malate synthase A(IPR006252)|Malate synthase-like superfamily(IPR011076)|Malate synthase, conserved site(IPR019830)	no|up	yes|up	yes|up	yes|up	3
MsG0880043085.01	Malate synthase(IPR001465)|Malate synthase A(IPR006252)|Malate synthase-like superfamily(IPR011076)|Malate synthase, conserved site(IPR019830)	yes|down	yes|up	yes|up	yes|up	4
MsG0480020560.01	Male sterility, NAD-binding(IPR013120)|Fatty acyl-CoA reductase, C-terminal(IPR033640)|NAD(P)-binding domain superfamily(IPR036291)	no|up	no|up	yes|up	yes|up	2
MsG0480020559.01	Male sterility, NAD-binding(IPR013120)|Fatty acyl-CoA reductase, C-terminal(IPR033640)|NAD(P)-binding domain superfamily(IPR036291)	no|up	yes|up	yes|up	yes|up	3
MsG0280010502.01	Male sterility, NAD-binding(IPR013120)|Fatty acyl-CoA reductase, C-terminal(IPR033640)|NAD(P)-binding domain superfamily(IPR036291)	no|up	yes|up	yes|up	yes|up	3
MsG0080049042.01	Malectin-like carbohydrate-binding domain(IPR024788)	no|up	no|up	no|up	yes|up	1
MsG0680035842.01	Malectin-like carbohydrate-binding domain(IPR024788)	no|up	no|up	no|up	yes|up	1
MsG0280010268.01	Malectin-like carbohydrate-binding domain(IPR024788)	no|up	yes|up	no|up	no|down	1
MsG0580027438.01	Malectin-like carbohydrate-binding domain(IPR024788)	no|up	yes|up	yes|up	no|up	2
MsG0180005096.01	Malectin-like carbohydrate-binding domain(IPR024788)|Leucine-rich repeat domain superfamily(IPR032675)	no|down	no|down	no|down	yes|down	1
MsG0380017686.01	Malic oxidoreductase(IPR001891)|Malic enzyme, N-terminal domain(IPR012301)|Malic enzyme, NAD-binding(IPR012302)|Malic enzyme, conserved site(IPR015884)|NAD(P)-binding domain superfamily(IPR036291)|Malic enzyme, N-terminal domain superfamily(IPR037062)	yes|up	no|up	no|up	no|down	1
MsG0380017911.01	MaoC-like domain(IPR002539)|HotDog domain superfamily(IPR029069)	no|up	no|up	no|up	yes|up	1
MsG0880047228.01	MATH/TRAF domain(IPR002083)|TRAF-like(IPR008974)	no|up	no|down	no|down	yes|down	1
MsG0880041880.01	MATH/TRAF domain(IPR002083)|TRAF-like(IPR008974)	no|up	no|up	yes|down	no|down	1
MsG0180005956.01	MATH/TRAF domain(IPR002083)|TRAF-like(IPR008974)	no|down	no|down	yes|down	yes|down	2
MsG0280008039.01	MCM domain(IPR001208)|DNA replication licensing factor Mcm6(IPR008049)|DREPP family(IPR008469)|Nucleic acid-binding, OB-fold(IPR012340)|Mini-chromosome maintenance, conserved site(IPR018525)|P-loop containing nucleoside triphosphate hydrolase(IPR027417)|Mini-chromosome maintenance protein(IPR031327)|MCM OB domain(IPR033762)	no|up	no|down	yes|down	no|down	1
MsG0580029335.01	MD-2-related lipid-recognition domain(IPR003172)|Immunoglobulin E-set(IPR014756)	no|up	no|up	no|down	yes|down	1
MsG0380016944.01	Mechanosensitive ion channel MscS(IPR006685)|LSM domain superfamily(IPR010920)|Mechanosensitive ion channel MscS domain superfamily(IPR023408)	no|up	yes|up	no|up	yes|up	2
MsG0880045449.01	Mechanosensitive ion channel MscS(IPR006685)|LSM domain superfamily(IPR010920)|Mechanosensitive ion channel MscS-like, plants/fungi(IPR016688)|Mechanosensitive ion channel MscS domain superfamily(IPR023408)	no|down	no|up	no|down	yes|down	1
MsG0680035616.01	Mediator complex, subunit Med25, von Willebrand factor type A(IPR021419)	no|down	no|down	yes|down	no|down	1
MsG0480019489.01	Mediator complex, subunit Med25, von Willebrand factor type A(IPR021419)	no|down	no|down	yes|down	no|down	1
MsG0780041803.01	Mei2/Mei2-like, C-terminal RNA recognition motif(IPR007201)|Nucleotide-binding alpha-beta plait domain superfamily(IPR012677)|MEI2-like, RNA recognition motif 3(IPR034454)|RNA-binding domain superfamily(IPR035979)	no|down	yes|down	yes|down	yes|down	3
MsG0480022351.01	Membrane attack complex component/perforin (MACPF) domain(IPR020864)	yes|up	yes|up	yes|up	no|up	3
MsG0580025225.01	Membrane transport protein(IPR004776)	no|up	no|up	yes|up	yes|up	2
MsG0580025224.01	Membrane transport protein(IPR004776)	no|up	no|down	no|up	yes|up	1
MsG0880041844.01	Membrane transport protein(IPR004776)	no|up	yes|up	yes|up	yes|up	3
MsG0680034598.01	Membrane transport protein(IPR004776)|Auxin efflux carrier, plant type(IPR014024)	yes|up	no|up	yes|up	no|up	2
MsG0780039811.01	Membrane transport protein(IPR004776)|Cupin 1(IPR006045)|RmlC-like cupin domain superfamily(IPR011051)|Auxin efflux carrier, plant type(IPR014024)|RmlC-like jelly roll fold(IPR014710)	no|up	yes|up	no|up	no|down	1
MsG0780038735.01	Metallothionein, family 15, plant(IPR000347)	no|down	yes|down	no|down	no|up	1
MsG0880044067.01	Methyladenine glycosylase(IPR005019)|DNA glycosylase(IPR011257)	no|up	no|up	no|down	yes|down	1
MsG0280009451.01	Methyladenine glycosylase(IPR005019)|DNA glycosylase(IPR011257)	no|down	no|down	yes|down	yes|down	2
MsG0380013071.01	Methyl-CpG DNA binding(IPR001739)|Signal transduction response regulator, receiver domain(IPR001789)|CCT domain(IPR010402)|CheY-like superfamily(IPR011006)|Zinc finger, CW-type(IPR011124)|DNA-binding domain superfamily(IPR016177)	no|down	yes|down	no|down	no|down	1
MsG0480018504.01	Methyltransferase FkbM(IPR006342)|Methyltransferase type 11(IPR013216)|S-adenosyl-L-methionine-dependent methyltransferase(IPR029063)	no|up	yes|up	no|up	no|down	1
MsG0380015654.01	Methyltransferase type 11(IPR013216)|S-adenosyl-L-methionine-dependent methyltransferase(IPR029063)	no|down	no|down	no|down	yes|down	1
MsG0580024031.01	MFS transporter superfamily(IPR036259)	no|up	no|up	no|up	yes|up	1
MsG0080048259.01	MFS transporter superfamily(IPR036259)	no|up	yes|up	no|up	no|up	1
MsG0280006561.01	MFS transporter superfamily(IPR036259)	no|down	yes|down	yes|down	no|down	2
MsG0280007500.01	Microtubule-associated protein 70(IPR009768)	no|down	no|down	yes|down	yes|down	2
MsG0780040015.01	MIF4G-like, type 3(IPR003890)|MIF4G-like domain superfamily(IPR016021)|Armadillo-type fold(IPR016024)	yes|up	no|up	no|up	no|up	1
MsG0380016722.01	Mini-chromosome maintenance complex-binding protein(IPR019140)	no|up	yes|up	no|up	no|up	1
MsG0080048273.01	Mitochondrial carrier protein(IPR002067)|Adenine nucleotide translocator 1(IPR002113)|Mitochondrial substrate/solute carrier(IPR018108)|Mitochondrial carrier domain superfamily(IPR023395)	no|up	no|up	no|up	yes|up	1
MsG0480023317.01	Mitochondrial carrier protein(IPR002067)|IPT domain(IPR002909)|CG-1 DNA-binding domain(IPR005559)|Immunoglobulin-like fold(IPR013783)|Immunoglobulin E-set(IPR014756)|Mitochondrial substrate/solute carrier(IPR018108)|Ankyrin repeat-containing domain(IPR020683)|Mitochondrial carrier domain superfamily(IPR023395)|Ankyrin repeat-containing domain superfamily(IPR036770)	yes|up	no|up	yes|up	no|up	2
MsG0280008008.01	Mitochondrial carrier protein(IPR002067)|Mitochondrial substrate/solute carrier(IPR018108)|Mitochondrial carrier domain superfamily(IPR023395)	no|down	yes|down	yes|down	yes|down	3
MsG0380017434.01	Mitochondrial carrier protein(IPR002067)|Mitochondrial substrate/solute carrier(IPR018108)|Mitochondrial carrier domain superfamily(IPR023395)	no|up	no|up	no|up	yes|up	1
MsG0880042688.01	Mitochondrial carrier protein(IPR002067)|Mitochondrial substrate/solute carrier(IPR018108)|Mitochondrial carrier domain superfamily(IPR023395)	no|down	yes|down	yes|down	yes|down	3
MsG0880043271.01	Mitochondrial carrier UCP-like(IPR002030)|Mitochondrial substrate/solute carrier(IPR018108)|Mitochondrial carrier domain superfamily(IPR023395)	no|down	no|down	yes|down	no|down	1
MsG0180004953.01	Mitochondrial carrier UCP-like(IPR002030)|Mitochondrial substrate/solute carrier(IPR018108)|Mitochondrial carrier domain superfamily(IPR023395)	no|up	no|up	yes|up	no|up	1
MsG0180004855.01	Mitochondrial inner membrane translocase subunit Tim17/Tim22/Tim23/peroxisomal protein PMP24(IPR003397)|Serine aminopeptidase, S33(IPR022742)|Alpha/Beta hydrolase fold(IPR029058)	no|down	no|down	yes|down	no|down	1
MsG0280007439.01	Mitochondrial pyruvate carrier(IPR005336)	no|up	yes|down	yes|down	no|down	2
MsG0680031802.01	Mitochondrial substrate/solute carrier(IPR018108)|Mitochondrial carrier domain superfamily(IPR023395)	yes|up	no|up	no|up	no|up	1
MsG0580025662.01	Mitochondrial substrate/solute carrier(IPR018108)|Mitochondrial carrier domain superfamily(IPR023395)	yes|up	yes|up	yes|up	yes|up	4
MsG0080048346.01	Mitochondrial substrate/solute carrier(IPR018108)|Mitochondrial carrier domain superfamily(IPR023395)	no|up	no|up	yes|up	no|up	1
MsG0380016489.01	Mitochondrial substrate/solute carrier(IPR018108)|Mitochondrial carrier domain superfamily(IPR023395)	no|up	no|up	no|up	yes|up	1
MsG0680034165.01	Mitochondrial substrate/solute carrier(IPR018108)|Mitochondrial carrier domain superfamily(IPR023395)	yes|up	no|up	no|up	no|up	1
MsG0380017963.01	Mlo-related protein(IPR004326)	no|up	yes|up	yes|up	no|up	2
MsG0580025369.01	MOB kinase activator family(IPR005301)|MOB kinase activator superfamily(IPR036703)	no|up	no|up	no|up	yes|up	1
MsG0280008098.01	Molybdenum cofactor sulfurase, C-terminal(IPR005302)|MOSC, N-terminal beta barrel(IPR005303)	no|up	no|down	no|up	yes|up	1
MsG0580027449.01	MORN motif(IPR003409)	yes|down	yes|down	no|down	no|down	2
MsG0580027523.01	MORN motif(IPR003409)	no|down	yes|down	no|down	no|down	1
MsG0180000680.01	mRNA splicing factor Cwf21 domain(IPR013170)	no|up	no|up	no|up	yes|up	1
MsG0680035619.01	Mrp, conserved site(IPR000808)|MIP18 family-like(IPR002744)|Mrp/NBP35 ATP-binding protein(IPR019591)|P-loop containing nucleoside triphosphate hydrolase(IPR027417)|Flagellum site-determining protein YlxH/ Fe-S cluster assembling factor NBP35(IPR033756)|Fe-S cluster assembly domain superfamily(IPR034904)	no|down	yes|up	no|up	no|up	1
MsG0580025146.01	Mss4-like superfamily(IPR011057)	yes|up	yes|up	no|up	no|up	2
MsG0880043501.01	Multi antimicrobial extrusion protein(IPR002528)	no|up	no|up	yes|up	yes|up	2
MsG0480019290.01	Multi antimicrobial extrusion protein(IPR002528)	no|down	no|down	yes|down	yes|down	2
MsG0580029652.01	Multi antimicrobial extrusion protein(IPR002528)	no|down	yes|down	no|down	yes|down	2
MsG0380012658.01	Multi antimicrobial extrusion protein(IPR002528)	no|up	yes|up	no|up	no|up	1
MsG0280010607.01	Multi antimicrobial extrusion protein(IPR002528)	no|up	no|up	yes|up	yes|up	2
MsG0180005895.01	Multi antimicrobial extrusion protein(IPR002528)	no|up	yes|up	no|up	yes|up	2
MsG0680035782.01	Multi antimicrobial extrusion protein(IPR002528)	no|down	no|up	no|down	yes|down	1
MsG0580025672.01	Multi antimicrobial extrusion protein(IPR002528)	yes|up	no|no test	no|up	yes|up	2
MsG0580024415.01	Multi antimicrobial extrusion protein(IPR002528)	yes|up	yes|up	yes|up	no|up	3
MsG0180005888.01	Multi antimicrobial extrusion protein(IPR002528)	no|up	no|up	yes|up	yes|up	2
MsG0780040285.01	Multi antimicrobial extrusion protein(IPR002528)	no|up	yes|up	yes|up	yes|up	3
MsG0580025674.01	Multi antimicrobial extrusion protein(IPR002528)	no|up	no|up	yes|up	yes|up	2
MsG0780039979.01	Multi antimicrobial extrusion protein(IPR002528)	no|down	yes|down	yes|down	no|down	2
MsG0680035325.01	Multi antimicrobial extrusion protein(IPR002528)	no|up	no|up	no|up	yes|up	1
MsG0680030296.01	Multi antimicrobial extrusion protein(IPR002528)|Nucleic acid-binding, OB-fold(IPR012340)	no|up	no|up	no|up	yes|up	1
MsG0880042979.01	Multicopper oxidase, copper-binding site(IPR002355)|Cupredoxin(IPR008972)|Multicopper oxidase, type 2(IPR011706)|Multicopper oxidase, type 3(IPR011707)|Multicopper oxidases, conserved site(IPR033138)|Laccase, first cupredoxin domain(IPR034288)	no|up	no|down	no|down	yes|down	1
MsG0880045801.01	Multicopper oxidase, type 1(IPR001117)|Cupredoxin(IPR008972)|Multicopper oxidase, type 2(IPR011706)|Multicopper oxidase, type 3(IPR011707)|Ascorbate oxidase homologue, first cupredoxin domain(IPR034273)	no|down	no|up	no|down	yes|down	1
MsG0880045802.01	Multicopper oxidase, type 1(IPR001117)|Cupredoxin(IPR008972)|Multicopper oxidase, type 2(IPR011706)|Multicopper oxidase, type 3(IPR011707)|Ascorbate oxidase homologue, first cupredoxin domain(IPR034273)	no|up	no|up	no|down	yes|down	1
MsG0480021753.01	Multicopper oxidase, type 1(IPR001117)|Cupredoxin(IPR008972)|Multicopper oxidase, type 2(IPR011706)|Multicopper oxidase, type 3(IPR011707)|Ascorbate oxidase homologue, first cupredoxin domain(IPR034273)|Ascorbate oxidase homologue, third cupredoxin domain(IPR034275)	yes|up	yes|up	yes|up	yes|up	4
MsG0180000011.01	Multicopper oxidase, type 1(IPR001117)|Cupredoxin(IPR008972)|Multicopper oxidase, type 2(IPR011706)|Multicopper oxidase, type 3(IPR011707)|Ascorbate oxidase homologue, first cupredoxin domain(IPR034273)|Ascorbate oxidase homologue, third cupredoxin domain(IPR034275)	no|up	no|up	no|down	yes|down	1
MsG0480018596.01	Multicopper oxidase, type 1(IPR001117)|Cupredoxin(IPR008972)|Multicopper oxidase, type 2(IPR011706)|Multicopper oxidase, type 3(IPR011707)|Laccase(IPR017761)|Laccase, second cupredoxin domain(IPR034285)|Laccase, first cupredoxin domain(IPR034288)	no|down	no|down	yes|down	yes|down	2
MsG0580024980.01	Multicopper oxidase, type 1(IPR001117)|F-box domain(IPR001810)|Multicopper oxidase, copper-binding site(IPR002355)|Cupredoxin(IPR008972)|Multicopper oxidase, type 2(IPR011706)|Multicopper oxidase, type 3(IPR011707)|Laccase(IPR017761)|Leucine-rich repeat domain superfamily(IPR032675)|Multicopper oxidases, conserved site(IPR033138)|Laccase, second cupredoxin domain(IPR034285)|Laccase, first cupredo…	no|up	no|up	yes|down	yes|down	2
MsG0580028043.01	Multicopper oxidase, type 1(IPR001117)|Multicopper oxidase, copper-binding site(IPR002355)|Cupredoxin(IPR008972)|Multicopper oxidase, type 2(IPR011706)|Multicopper oxidase, type 3(IPR011707)|Laccase(IPR017761)|Multicopper oxidases, conserved site(IPR033138)|Laccase, second cupredoxin domain(IPR034285)|Laccase, first cupredoxin domain(IPR034288)|Laccase, third cupredoxin domain(IPR034289)	no|up	yes|up	no|down	no|down	1
MsG0780038804.01	Multicopper oxidase, type 1(IPR001117)|Multicopper oxidase, copper-binding site(IPR002355)|Cupredoxin(IPR008972)|Multicopper oxidase, type 2(IPR011706)|Multicopper oxidase, type 3(IPR011707)|Laccase(IPR017761)|Multicopper oxidases, conserved site(IPR033138)|Laccase, second cupredoxin domain(IPR034285)|Laccase, first cupredoxin domain(IPR034288)|Laccase, third cupredoxin domain(IPR034289)	no|down	no|down	yes|down	yes|down	2
MsG0580024979.01	Multicopper oxidase, type 1(IPR001117)|Multicopper oxidase, copper-binding site(IPR002355)|Cupredoxin(IPR008972)|Multicopper oxidase, type 2(IPR011706)|Multicopper oxidase, type 3(IPR011707)|Laccase(IPR017761)|Multicopper oxidases, conserved site(IPR033138)|Laccase, second cupredoxin domain(IPR034285)|Laccase, first cupredoxin domain(IPR034288)|Laccase, third cupredoxin domain(IPR034289)	no|up	no|down	yes|down	yes|down	2
MsG0780038617.01	Multicopper oxidase, type 1(IPR001117)|Multicopper oxidase, copper-binding site(IPR002355)|Cupredoxin(IPR008972)|Multicopper oxidase, type 2(IPR011706)|Multicopper oxidase, type 3(IPR011707)|Laccase(IPR017761)|Multicopper oxidases, conserved site(IPR033138)|Laccase, second cupredoxin domain(IPR034285)|Laccase, first cupredoxin domain(IPR034288)|Laccase, third cupredoxin domain(IPR034289)	no|up	no|down	yes|down	yes|down	2
MsG0480023349.01	Multicopper oxidase, type 1(IPR001117)|Multicopper oxidase, copper-binding site(IPR002355)|Cupredoxin(IPR008972)|Multicopper oxidase, type 2(IPR011706)|Multicopper oxidase, type 3(IPR011707)|Multicopper oxidases, conserved site(IPR033138)|Ascorbate oxidase, third cupredoxin domain(IPR034267)	yes|up	yes|up	no|up	no|down	2
MsG0380015858.01	Multicopper oxidase, type 1(IPR001117)|Multicopper oxidase, copper-binding site(IPR002355)|Cupredoxin(IPR008972)|Multicopper oxidase, type 2(IPR011706)|Multicopper oxidase, type 3(IPR011707)|Multicopper oxidases, conserved site(IPR033138)|Ascorbate oxidase, third cupredoxin domain(IPR034267)	no|up	no|up	no|down	yes|down	1
MsG0280011099.01	Myb/SANT-like domain(IPR024752)	yes|up	no|up	no|up	no|up	1
MsG0780040574.01	MYB-CC type transcription factor, LHEQLE-containing domain(IPR025756)	no|down	no|down	yes|down	yes|down	2
MsG0880047605.01	Myc-type, basic helix-loop-helix (bHLH) domain(IPR011598)|Aldehyde dehydrogenase domain(IPR015590)|Aldehyde dehydrogenase, cysteine active site(IPR016160)|Aldehyde/histidinol dehydrogenase(IPR016161)|Aldehyde dehydrogenase, N-terminal(IPR016162)|Aldehyde dehydrogenase, C-terminal(IPR016163)|Aldehyde dehydrogenase, glutamic acid active site(IPR029510)|Helix-loop-helix DNA-binding domain superfamil…	no|up	yes|up	yes|up	no|up	2
MsG0280009221.01	Myc-type, basic helix-loop-helix (bHLH) domain(IPR011598)|Helix-loop-helix DNA-binding domain superfamily(IPR036638)	yes|down	no|down	no|down	no|down	1
MsG0880046037.01	Myc-type, basic helix-loop-helix (bHLH) domain(IPR011598)|Helix-loop-helix DNA-binding domain superfamily(IPR036638)	no|down	no|down	no|down	yes|down	1
MsG0580028985.01	Myc-type, basic helix-loop-helix (bHLH) domain(IPR011598)|Helix-loop-helix DNA-binding domain superfamily(IPR036638)	no|down	no|up	yes|down	yes|down	2
MsG0880046036.01	Myc-type, basic helix-loop-helix (bHLH) domain(IPR011598)|Helix-loop-helix DNA-binding domain superfamily(IPR036638)	no|up	no|up	no|down	yes|down	1
MsG0280008271.01	Myc-type, basic helix-loop-helix (bHLH) domain(IPR011598)|Helix-loop-helix DNA-binding domain superfamily(IPR036638)	no|up	no|up	no|down	yes|down	1
MsG0280006829.01	Myc-type, basic helix-loop-helix (bHLH) domain(IPR011598)|Helix-loop-helix DNA-binding domain superfamily(IPR036638)	yes|up	yes|up	yes|up	yes|up	4
MsG0380017730.01	Myc-type, basic helix-loop-helix (bHLH) domain(IPR011598)|Helix-loop-helix DNA-binding domain superfamily(IPR036638)	no|up	yes|up	yes|up	yes|up	3
MsG0880045169.01	Myc-type, basic helix-loop-helix (bHLH) domain(IPR011598)|Helix-loop-helix DNA-binding domain superfamily(IPR036638)	no|down	no|down	no|down	yes|down	1
MsG0780041576.01	Myc-type, basic helix-loop-helix (bHLH) domain(IPR011598)|Helix-loop-helix DNA-binding domain superfamily(IPR036638)	no|up	no|up	yes|up	yes|up	2
MsG0280011449.01	Myc-type, basic helix-loop-helix (bHLH) domain(IPR011598)|Helix-loop-helix DNA-binding domain superfamily(IPR036638)	no|down	yes|down	yes|down	yes|down	3
MsG0580024695.01	Myc-type, basic helix-loop-helix (bHLH) domain(IPR011598)|Helix-loop-helix DNA-binding domain superfamily(IPR036638)	no|down	yes|down	yes|down	yes|down	3
MsG0280010623.01	Myc-type, basic helix-loop-helix (bHLH) domain(IPR011598)|Helix-loop-helix DNA-binding domain superfamily(IPR036638)	no|down	no|up	yes|down	yes|down	2
MsG0480021960.01	Myc-type, basic helix-loop-helix (bHLH) domain(IPR011598)|Helix-loop-helix DNA-binding domain superfamily(IPR036638)	no|down	no|down	no|down	yes|down	1
MsG0180005526.01	Myc-type, basic helix-loop-helix (bHLH) domain(IPR011598)|Helix-loop-helix DNA-binding domain superfamily(IPR036638)	no|down	yes|down	no|up	no|down	1
MsG0580025575.01	Myc-type, basic helix-loop-helix (bHLH) domain(IPR011598)|Helix-loop-helix DNA-binding domain superfamily(IPR036638)	no|up	no|up	no|up	yes|up	1
MsG0780040407.01	Myc-type, basic helix-loop-helix (bHLH) domain(IPR011598)|Helix-loop-helix DNA-binding domain superfamily(IPR036638)	yes|down	yes|down	yes|down	yes|down	4
MsG0480021129.01	Myc-type, basic helix-loop-helix (bHLH) domain(IPR011598)|Helix-loop-helix DNA-binding domain superfamily(IPR036638)	no|up	yes|up	yes|up	no|up	2
MsG0780038108.01	Myc-type, basic helix-loop-helix (bHLH) domain(IPR011598)|Helix-loop-helix DNA-binding domain superfamily(IPR036638)	no|down	no|down	no|down	yes|down	1
MsG0880043481.01	Myc-type, basic helix-loop-helix (bHLH) domain(IPR011598)|Helix-loop-helix DNA-binding domain superfamily(IPR036638)	no|up	no|down	yes|down	no|down	1
MsG0480022828.01	Myc-type, basic helix-loop-helix (bHLH) domain(IPR011598)|Helix-loop-helix DNA-binding domain superfamily(IPR036638)	no|down	no|down	yes|down	no|down	1
MsG0180002911.01	Myc-type, basic helix-loop-helix (bHLH) domain(IPR011598)|Helix-loop-helix DNA-binding domain superfamily(IPR036638)	no|up	no|up	no|up	yes|up	1
MsG0580024696.01	Myc-type, basic helix-loop-helix (bHLH) domain(IPR011598)|Helix-loop-helix DNA-binding domain superfamily(IPR036638)	yes|up	yes|up	no|up	no|down	2
MsG0180004559.01	Myc-type, basic helix-loop-helix (bHLH) domain(IPR011598)|Helix-loop-helix DNA-binding domain superfamily(IPR036638)	no|down	no|down	yes|up	yes|up	2
MsG0580027894.01	Myc-type, basic helix-loop-helix (bHLH) domain(IPR011598)|Helix-loop-helix DNA-binding domain superfamily(IPR036638)	no|down	no|up	yes|up	no|up	1
MsG0780040838.01	Myc-type, basic helix-loop-helix (bHLH) domain(IPR011598)|Helix-loop-helix DNA-binding domain superfamily(IPR036638)	no|up	no|down	no|down	yes|down	1
MsG0780037256.01	Myc-type, basic helix-loop-helix (bHLH) domain(IPR011598)|Helix-loop-helix DNA-binding domain superfamily(IPR036638)	no|up	yes|up	yes|up	no|up	2
MsG0680033964.01	Myc-type, basic helix-loop-helix (bHLH) domain(IPR011598)|Helix-loop-helix DNA-binding domain superfamily(IPR036638)	no|up	yes|down	no|down	no|down	1
MsG0380017794.01	Myc-type, basic helix-loop-helix (bHLH) domain(IPR011598)|Helix-loop-helix DNA-binding domain superfamily(IPR036638)	no|down	no|down	yes|down	yes|down	2
MsG0180002124.01	Myc-type, basic helix-loop-helix (bHLH) domain(IPR011598)|Helix-loop-helix DNA-binding domain superfamily(IPR036638)	yes|down	yes|down	yes|down	yes|down	4
MsG0080048707.01	Myc-type, basic helix-loop-helix (bHLH) domain(IPR011598)|Helix-loop-helix DNA-binding domain superfamily(IPR036638)	no|down	yes|down	no|down	no|down	1
MsG0180002113.01	Myc-type, basic helix-loop-helix (bHLH) domain(IPR011598)|Helix-loop-helix DNA-binding domain superfamily(IPR036638)	no|down	yes|down	no|down	no|down	1
MsG0280011451.01	Myc-type, basic helix-loop-helix (bHLH) domain(IPR011598)|Helix-loop-helix DNA-binding domain superfamily(IPR036638)	no|down	no|up	yes|up	no|up	1
MsG0280006777.01	NAC domain(IPR003441)|NAC domain superfamily(IPR036093)	no|down	no|down	no|down	yes|down	1
MsG0480023497.01	NAC domain(IPR003441)|NAC domain superfamily(IPR036093)	yes|up	yes|up	yes|up	yes|up	4
[truncated: 2,681 more rows]

## Sheet: Table S3B
Table S3B DEGs in group of TDP vs TNP
Gene Name	Gene Description	FC(TDP/TNP)	Log2FC(TDP/TNP)	Pvalue	Padjust	Significant	Regulate	TDP_2	TDP_3	TDP_4	TNP_1	TNP_2	TNP_4	TDP	TNP
MsG0080048206.01	Protein kinase domain(IPR000719)|Serine-threonine/tyrosine-protein kinase, catalytic domain(IPR001245)|Serine/threonine-protein kinase, active site(IPR008271)|Protein kinase-like domain superfamily(IPR011009)|Protein kinase, ATP binding site(IPR017441)|Wall-associated receptor kinase, galacturonan-binding domain(IPR025287)	3.0057	1.5877	0.00185532	0.0475644	yes	up	5.49	8.4	3.42	1.21	2.88	1.83	5.77	1.97333
MsG0080048299.01	AP2/ERF domain(IPR001471)|DNA-binding domain superfamily(IPR016177)|AP2/ERF transcription factor ERF/PTI6(IPR017392)|AP2/ERF domain superfamily(IPR036955)	5.38259	2.4283	0.000163974	0.00728701	yes	up	33.39	74.9	46.04	6.03	19.31	4.17	51.4433	9.83667
MsG0080048345.01	Chalcone/stilbene synthase, N-terminal(IPR001099)|Polyketide synthase, type III(IPR011141)|Chalcone/stilbene synthase, C-terminal(IPR012328)|Thiolase-like(IPR016039)	4.57238	2.19294	2.5336e-05	0.00181625	yes	up	34.79	46.31	37.79	8.28	9.96	3	39.63	7.08
MsG0080048347.01	Chalcone/stilbene synthase, N-terminal(IPR001099)|Chalcone/stilbene synthase, C-terminal(IPR012328)|Thiolase-like(IPR016039)	5.68099	2.50614	0.00019015	0.00828255	yes	up	4.62	12.03	9.26	2.15	2.04	0.36	8.63667	1.51667
MsG0080048348.01	Chalcone/stilbene synthase, N-terminal(IPR001099)|Chalcone/stilbene synthase, C-terminal(IPR012328)|Thiolase-like(IPR016039)|Chalcone/stilbene synthase, active site(IPR018088)	7.5517	2.9168	9.64871e-10	3.73977e-07	yes	up	4.4	7.84	6.92	1.16	0.74	0.82	6.38667	0.906667
MsG0080048520.01	-	3.10119	1.63282	7.63636e-07	0.000111228	yes	up	28.46	50.97	50.86	13.13	14.08	14.53	43.43	13.9133
MsG0080048529.01	X8 domain(IPR012946)	2.1282	1.08963	0.000295451	0.0116289	yes	up	8.86	11.3	10.14	5.04	5.85	4.02	10.1	4.97
MsG0080048608.01	Leucine-rich repeat domain superfamily(IPR032675)	7.34641	2.87704	4.26294e-05	0.00259268	yes	up	31.55	39.19	8.73	2.67	6.72	1.7	26.49	3.69667
MsG0080048650.01	CALMODULIN-BINDING PROTEIN60(IPR012416)	9.36703	3.22759	1.55807e-11	1.18766e-08	yes	up	11.18	37.94	30.16	2.39	3.37	3.37	26.4267	3.04333
MsG0080048730.01	Toll/interleukin-1 receptor homology (TIR) domain(IPR000157)|Toll/interleukin-1 receptor homology (TIR) domain superfamily(IPR035897)	15.3733	3.94236	0.000991667	0.0297014	yes	up	2.06	6.18	3.55	0	0.6	0.19	3.93	0.263333
MsG0080048862.01	-	5.39769	2.43234	1.46169e-08	4.02722e-06	yes	up	118.87	271.96	211.1	27.84	55.01	32.17	200.643	38.34
	-	4.64635	2.2161	0.000124861	0.0058272	yes	up	142.99	97.84	91.67	36.65	31.49	6.25	110.833	24.7967
MsG0180000019.01	-	2.31146	1.20881	7.94295e-05	0.00405826	yes	up	60.79	75.8	77.2	26.38	44.21	24.52	71.2633	31.7033
MsG0180000075.01	-	21.6504	4.43632	8.04479e-06	0.000744811	yes	up	2.01	2.09	4.55	0.42	0.07	0	2.88333	0.163333
MsG0180000151.01	Serine-threonine/tyrosine-protein kinase, catalytic domain(IPR001245)|Leucine-rich repeat(IPR001611)|Protein kinase-like domain superfamily(IPR011009)|Leucine-rich repeat-containing N-terminal, plant-type(IPR013210)|Leucine-rich repeat domain superfamily(IPR032675)	2.23903	1.16287	0.00152829	0.0409237	yes	up	6.38	13.2	12.92	4.53	6	4.5	10.8333	5.01
MsG0180000197.01	Cytochrome P450(IPR001128)|Cytochrome P450, E-class, group IV(IPR002403)|Cytochrome P450 superfamily(IPR036396)	2.55561	1.35367	0.000185621	0.00810073	yes	up	37.76	72.57	75.08	24.08	25.99	25.51	61.8033	25.1933
MsG0180000214.01	Domain of unknown function DUF223(IPR003871)|Nucleic acid-binding, OB-fold(IPR012340)	369.897	8.53098	1.10856e-08	3.20893e-06	yes	up	4.1	2.35	13.38	0	0	0	6.61	0
MsG0180000234.01	-	2.47563	1.30779	0.000154721	0.00697862	yes	up	135.05	124.98	56.82	34.91	43.27	35.9	105.617	38.0267
MsG0180000301.01	Gibberellin regulated protein(IPR003854)	2.19798	1.13618	0.000546416	0.019077	yes	up	415.93	333.2	498.23	130.14	401.19	83.86	415.787	205.063
MsG0180000385.01	PPM-type phosphatase domain(IPR001932)|PPM-type phosphatase domain superfamily(IPR036457)	0.283389	-1.81915	7.05218e-08	1.59868e-05	yes	down	7.23	10.44	8.72	25.01	31.82	39.71	8.79667	32.18
MsG0180000399.01	PPM-type phosphatase domain(IPR001932)|PPM-type phosphatase domain superfamily(IPR036457)	0.382763	-1.38548	5.26703e-05	0.00299618	yes	down	55.18	65.52	39.48	120.81	193.06	132.49	53.3933	148.787
MsG0180000619.01	Poly(ADP-ribose) polymerase, catalytic domain(IPR012317)|WWE domain superfamily(IPR037197)	0.448457	-1.15696	0.000840501	0.0264382	yes	down	4.28	5.91	7.1	15.83	13.51	10.78	5.76333	13.3733
MsG0180000656.01	EGF-like calcium-binding domain(IPR001881)|EGF-like, conserved site(IPR013032)	0.292423	-1.77387	2.99979e-05	0.00201763	yes	down	1.3	0.88	0.95	2.88	3.59	4.55	1.04333	3.67333
MsG0180000910.01	EGF-type aspartate/asparagine hydroxylation site(IPR000152)|Protein kinase domain(IPR000719)|EGF-like calcium-binding domain(IPR001881)|Serine/threonine-protein kinase, active site(IPR008271)|Protein kinase-like domain superfamily(IPR011009)|Protein kinase, ATP binding site(IPR017441)|EGF-like calcium-binding, conserved site(IPR018097)	5.00169	2.32241	0.000465927	0.0168057	yes	up	1.77	3.06	6.95	1.16	0.86	0.63	3.92667	0.883333
MsG0180000929.01	Protein kinase domain(IPR000719)|Serine-threonine/tyrosine-protein kinase, catalytic domain(IPR001245)|Protein kinase-like domain superfamily(IPR011009)|Protein kinase, ATP binding site(IPR017441)	2.39429	1.2596	5.22909e-05	0.00298202	yes	up	16.48	12.73	20.34	5.08	8.42	7.27	16.5167	6.92333
MsG0180000930.01	Protein kinase domain(IPR000719)|Protein kinase-like domain superfamily(IPR011009)|Protein kinase, ATP binding site(IPR017441)|S-receptor-like serine/threonine-protein kinase(IPR024171)	2.49662	1.31998	0.000260423	0.0105218	yes	up	17.9	21.06	20.21	5.1	11.12	8.97	19.7233	8.39667
MsG0180000977.01	Protein kinase domain(IPR000719)|Serine/threonine-protein kinase, active site(IPR008271)|Protein kinase-like domain superfamily(IPR011009)|Protein kinase, ATP binding site(IPR017441)	3.89884	1.96305	0.000427746	0.0157009	yes	up	3.89	4.65	9.3	1.95	1.04	1.79	5.94667	1.59333
MsG0180001050.01	UDP-glucuronosyl/UDP-glucosyltransferase(IPR002213)|UDP-glycosyltransferase family, conserved site(IPR035595)	3.70698	1.89024	0.000161575	0.00721661	yes	up	3.92	10.96	7.31	2.38	1.63	2.25	7.39667	2.08667
MsG0180001053.01	Protein kinase domain(IPR000719)|Serine/threonine-protein kinase, active site(IPR008271)|Protein kinase-like domain superfamily(IPR011009)	4.57865	2.19492	2.10591e-10	1.04691e-07	yes	up	96.69	158.55	144.65	27.26	41.07	21.81	133.297	30.0467
MsG0180001120.01	Protein kinase domain(IPR000719)|Serine/threonine-protein kinase, active site(IPR008271)|Protein kinase-like domain superfamily(IPR011009)|Wall-associated receptor kinase, galacturonan-binding domain(IPR025287)	3.30347	1.72398	4.05949e-05	0.00251579	yes	up	5.73	13.44	12.15	2.85	2.81	3.77	10.44	3.14333
MsG0180001124.01	Protein kinase domain(IPR000719)|Serine/threonine-protein kinase, active site(IPR008271)|Protein kinase-like domain superfamily(IPR011009)|Protein kinase, ATP binding site(IPR017441)|Wall-associated receptor kinase, galacturonan-binding domain(IPR025287)	9.30528	3.21805	2.78121e-05	0.00193315	yes	up	1.6	17.63	7.75	0.79	1.34	0.88	8.99333	1.00333
MsG0180001125.01	Protein kinase domain(IPR000719)|Serine/threonine-protein kinase, active site(IPR008271)|Protein kinase-like domain superfamily(IPR011009)|Protein kinase, ATP binding site(IPR017441)|Wall-associated receptor kinase, galacturonan-binding domain(IPR025287)	8.75145	3.12952	1.61707e-10	8.59978e-08	yes	up	16.13	53.24	58.45	4.25	5.78	5.12	42.6067	5.05
MsG0180001154.01	NUDIX hydrolase domain(IPR000086)|NUDIX hydrolase-like domain superfamily(IPR015797)|NUDIX hydrolase, conserved site(IPR020084)	7.63143	2.93195	9.93198e-06	0.000857074	yes	up	10.42	32.4	43.95	4.54	6.7	3.47	28.9233	4.90333
MsG0180001203.01	Cytochrome P450(IPR001128)|Cytochrome P450, E-class, group I(IPR002401)|Cytochrome P450 superfamily(IPR036396)	22.8147	4.51189	0.00142441	0.0389167	yes	up	7.02	5.5	1.06	0	0	0.59	4.52667	0.196667
MsG0180001271.01	Guanine nucleotide binding protein (G-protein), alpha subunit(IPR001019)|G protein alpha subunit, helical insertion(IPR011025)|P-loop containing nucleoside triphosphate hydrolase(IPR027417)	4.78009	2.25704	3.40854e-09	1.14627e-06	yes	up	12.95	29.23	31.05	5.07	4.97	5.6	24.41	5.21333
MsG0180001276.01	AMP-dependent synthetase/ligase(IPR000873)|AMP-binding, conserved site(IPR020845)	2.16578	1.11489	1.37321e-05	0.00110963	yes	up	10.25	14.52	11.03	6.84	5.22	5.16	11.9333	5.74
MsG0180001501.01	Domain of unknown function DUF223(IPR003871)|Nucleic acid-binding, OB-fold(IPR012340)|Domain of unknown function DUF4283(IPR025558)	30.4427	4.92803	1.33414e-07	2.60761e-05	yes	up	14.67	38.46	22.81	0.43	1.75	0	25.3133	0.726667
MsG0180001685.01	Very-long-chain 3-ketoacyl-CoA synthase(IPR012392)|FAE1/Type III polyketide synthase-like protein(IPR013601)|3-Oxoacyl-[acyl-carrier-protein (ACP)] synthase III, C-terminal(IPR013747)|Thiolase-like(IPR016039)	2.90395	1.53802	0.000954438	0.0289855	yes	up	6.33	10.85	9.31	5.35	2.11	2.13	8.83	3.19667
MsG0180001785.01	SANT/Myb domain(IPR001005)|Homeobox-like domain superfamily(IPR009057)	5.56588	2.47661	1.38829e-08	3.91943e-06	yes	up	39.11	36.95	20.7	4.71	7.46	6.17	32.2533	6.11333
MsG0180001803.01	-	8.85174	3.14596	5.09767e-07	7.93017e-05	yes	up	113.39	192.47	47.51	23.65	11.77	7	117.79	14.14
MsG0180001944.01	Armadillo-like helical(IPR011989)|Armadillo-type fold(IPR016024)	11.4476	3.51697	0.000590275	0.0201788	yes	up	1.15	4.18	4.59	0	0.49	0.39	3.30667	0.293333
MsG0180001999.01	Dephospho-CoA kinase(IPR001977)|Transcription factor, MADS-box(IPR002100)|Transcription factor, MADS-box superfamily(IPR036879)	0.00871372	-6.8425	3.98247e-05	0.0024815	yes	down	0	0.13	0	0.95	4.53	0.35	0.0433333	1.94333
MsG0180002090.01	Leucine-rich repeat domain superfamily(IPR032675)	0.0946712	-3.40093	2.37793e-05	0.00172695	yes	down	0.46	0.62	0.97	0.69	10.45	11.22	0.683333	7.45333
MsG0180002092.01	Leucine-rich repeat(IPR001611)|NB-ARC(IPR002182)|AAA+ ATPase domain(IPR003593)|P-loop containing nucleoside triphosphate hydrolase(IPR027417)|Leucine-rich repeat domain superfamily(IPR032675)	0.108277	-3.2072	5.38209e-12	4.73375e-09	yes	down	0.4	4.45	2.3	12.94	9.93	6.42	2.38333	9.76333
MsG0180002124.01	Myc-type, basic helix-loop-helix (bHLH) domain(IPR011598)|Helix-loop-helix DNA-binding domain superfamily(IPR036638)	0.266415	-1.90825	0.00103779	0.0307812	yes	down	6.35	1.83	3.25	10.93	10.84	18.33	3.81	13.3667
MsG0180002251.01	Toll/interleukin-1 receptor homology (TIR) domain(IPR000157)|NB-ARC(IPR002182)|AAA+ ATPase domain(IPR003593)|P-loop containing nucleoside triphosphate hydrolase(IPR027417)|Leucine-rich repeat domain superfamily(IPR032675)|Toll/interleukin-1 receptor homology (TIR) domain superfamily(IPR035897)|Winged helix DNA-binding domain superfamily(IPR036390)	5.28394	2.40161	0.000224072	0.00936759	yes	up	1.2	7.06	5.72	1.21	1.08	0.67	4.66	0.986667
MsG0180002255.01	NADPH-dependent FMN reductase-like(IPR005025)|Flavoprotein-like superfamily(IPR029039)	2.09745	1.06863	5.12333e-05	0.00293635	yes	up	150.26	223.44	140.46	96.89	87.88	74.14	171.387	86.3033
MsG0180002376.01	Exocyst complex component Exo70(IPR004140)|Cullin repeat-like-containing domain superfamily(IPR016159)	8.55305	3.09644	1.20979e-05	0.00100969	yes	up	1.69	4.99	6.88	0.31	0.86	0.63	4.52	0.6
MsG0180002594.01	Exocyst complex component Exo70(IPR004140)|Cullin repeat-like-containing domain superfamily(IPR016159)	4.75605	2.24976	0.000267113	0.0107164	yes	up	2.64	7.26	6.28	0.8	1.91	0.76	5.39333	1.15667
MsG0180002603.01	Hemopexin-like domain superfamily(IPR036375)	0.330782	-1.59605	5.4348e-05	0.00306871	yes	down	7.17	9.54	10.31	16.52	32.13	35.42	9.00667	28.0233
MsG0180002649.01	Pyridoxal-phosphate dependent enzyme(IPR001926)|Tryptophan synthase beta subunit-like PLP-dependent enzyme(IPR036052)	3.57957	1.83978	4.11634e-10	1.81024e-07	yes	up	4.88	4.24	5.51	1.88	1.15	1.2	4.87667	1.41
MsG0180002896.01	NB-ARC(IPR002182)|P-loop containing nucleoside triphosphate hydrolase(IPR027417)|Leucine-rich repeat domain superfamily(IPR032675)|Winged helix-like DNA-binding domain superfamily(IPR036388)	7.83748	2.97039	3.10817e-05	0.00207223	yes	up	1.46	6.3	2.78	0.17	0.68	0.62	3.51333	0.49
MsG0180003240.01	Target SNARE coiled-coil homology domain(IPR000727)|Syntaxin, N-terminal domain(IPR006011)|Syntaxin/epimorphin, conserved site(IPR006012)|SNARE(IPR010989)	2.38623	1.25473	9.90019e-05	0.00486876	yes	up	158.36	267.48	203.02	86.87	116.34	69.66	209.62	90.9567
MsG0180003241.01	Target SNARE coiled-coil homology domain(IPR000727)|Syntaxin, N-terminal domain(IPR006011)|Syntaxin/epimorphin, conserved site(IPR006012)|SNARE(IPR010989)	3.12887	1.64564	0.000107638	0.00521497	yes	up	71.49	180.35	146.12	33.84	59.9	37.61	132.653	43.7833
MsG0180003338.01	-	5.27606	2.39946	0.000464428	0.0167781	yes	up	17.43	54.83	34.56	3.88	13.74	3.13	35.6067	6.91667
MsG0180003375.01	GDSL lipase/esterase(IPR001087)|GDSL lipase/esterase-like, plant(IPR035669)|SGNH hydrolase superfamily(IPR036514)	2.76049	1.46493	0.000109865	0.00530038	yes	up	17.47	41.6	32.74	10.21	10.64	12.03	30.6033	10.96
MsG0180003462.01	Thaumatin(IPR001938)|Thaumatin, conserved site(IPR017949)|Osmotin/thaumatin-like superfamily(IPR037176)	49.2957	5.62339	4.04352e-05	0.0025127	yes	up	26.54	589.99	47.17	4.7	8.22	1.17	221.233	4.69667
MsG0180003484.01	Alpha carbonic anhydrase(IPR001148)|Carbonic anhydrase, alpha-class, conserved site(IPR018338)|Alpha carbonic anhydrase superfamily(IPR036398)	3.38392	1.7587	2.76155e-06	0.000306558	yes	up	18.9	38.4	34	9.09	10.38	11.3	30.4333	10.2567
MsG0180003590.01	Protein kinase domain(IPR000719)|Serine/threonine-protein kinase, active site(IPR008271)|Protein kinase-like domain superfamily(IPR011009)|Protein kinase, ATP binding site(IPR017441)	2.85568	1.51383	4.57488e-05	0.00273155	yes	up	15.22	24.25	17.01	5.5	9.46	5.44	18.8267	6.8
MsG0180003600.01	Hemopexin-like repeats(IPR018487)|Hemopexin-like domain superfamily(IPR036375)	0.330242	-1.59841	8.16746e-08	1.81333e-05	yes	down	258.77	263.98	348.8	619.76	1053.26	1021.58	290.517	898.2
MsG0180003688.01	Histone H2B(IPR000558)|Histone H2A/H2B/H3(IPR007125)|Histone-fold(IPR009072)	0.226657	-2.14142	2.22493e-06	0.000260921	yes	down	18.07	46.51	42.67	119.6	164.93	209.99	35.75	164.84
MsG0180003745.01	Leucine-rich repeat domain superfamily(IPR032675)	67.9469	6.08634	0.00026518	0.0106763	yes	up	0.65	0.63	0.34	0	0	0	0.54	0
MsG0180003746.01	RNA recognition motif domain(IPR000504)|Nucleotide-binding alpha-beta plait domain superfamily(IPR012677)|RNA-binding domain superfamily(IPR035979)	3621.33	11.8223	1.4936e-22	8.5389e-19	yes	up	31.19	24.81	34.74	0	0	0	30.2467	0
MsG0180003808.01	Ribokinase/fructokinase(IPR002139)|Carbohydrate/puine kinase, PfkB, conserved site(IPR002173)|Carbohydrate kinase PfkB(IPR011611)|RecQ mediated genome instability protein, N-terminal(IPR013894)|Ribokinase-like(IPR029056)	5.73393	2.51952	0.00138203	0.0380181	yes	up	1.38	0.35	1.1	0.21	0.11	0.15	0.943333	0.156667
MsG0180003879.01	Cytochrome P450(IPR001128)|Cytochrome P450, E-class, group I(IPR002401)|Cytochrome P450 superfamily(IPR036396)	4.59368	2.19965	7.81242e-07	0.000112361	yes	up	2.92	2.57	3.3	0.72	0.47	0.79	2.93	0.66
MsG0180003955.01	Bifunctional inhibitor/plant lipid transfer protein/seed storage helical domain(IPR016140)|Bifunctional inhibitor/plant lipid transfer protein/seed storage helical domain superfamily(IPR036312)	2.57153	1.36263	0.000869656	0.0271314	yes	up	22.87	38.14	35.06	20.24	9.43	9.6	32.0233	13.09
MsG0180004023.01	Aconitase/3-isopropylmalate dehydratase large subunit, alpha/beta/alpha domain(IPR001030)|Aconitase/3-isopropylmalate dehydratase large subunit, alpha/beta/alpha, subdomain 1/3(IPR015931)|Aconitase, iron-sulfur domain(IPR036008)	84.0425	6.39305	0.000334952	0.0128518	yes	up	0.54	0.47	1.08	0	0	0	0.696667	0
MsG0180004109.01	Domain of unknown function DUF4283(IPR025558)|Zinc knuckle CX2CX4HX4C(IPR025836)	30.9613	4.95239	2.2237e-09	7.94556e-07	yes	up	3.87	4.95	12.26	0.09	0.17	0.67	7.02667	0.31
MsG0180004167.01	U box domain(IPR003613)|Armadillo-like helical(IPR011989)|Zinc finger, RING/FYVE/PHD-type(IPR013083)|Armadillo-type fold(IPR016024)	8.64187	3.11134	2.13325e-05	0.00158902	yes	up	2.48	13.24	4.81	1.34	0.27	0.91	6.84333	0.84
MsG0180004168.01	Very-long-chain 3-ketoacyl-CoA synthase(IPR012392)|FAE1/Type III polyketide synthase-like protein(IPR013601)|Thiolase-like(IPR016039)	4.35054	2.12119	1.37264e-06	0.000176346	yes	up	6.83	13.83	9.34	3.21	1.78	2.35	10	2.44667
MsG0180004281.01	U box domain(IPR003613)|Armadillo-like helical(IPR011989)|Zinc finger, RING/FYVE/PHD-type(IPR013083)|Armadillo-type fold(IPR016024)	5.25236	2.39297	0.000166199	0.00735135	yes	up	5.51	16.51	19.73	1	4.34	2.8	13.9167	2.71333
MsG0180004283.01	-	4.4687	2.15985	1.12936e-06	0.000150351	yes	up	7.14	9.31	7.65	2.86	1.88	0.93	8.03333	1.89
MsG0180004460.01	Gnk2-homologous domain(IPR002902)|Gnk2-homologous domain superfamily(IPR038408)	3.17674	1.66755	0.00130336	0.0363478	yes	up	3.34	5.19	5.54	2.29	1.01	1.42	4.69	1.57333
MsG0180004547.01	Phosphoglycerate/bisphosphoglycerate mutase, active site(IPR001345)|Histidine phosphatase superfamily, clade-1(IPR013078)|Histidine phosphatase superfamily(IPR029033)	4.16312	2.05766	3.11504e-06	0.000339213	yes	up	10.65	27.39	28.06	5.46	4.91	6.01	22.0333	5.46
MsG0180004562.01	Zinc finger, RING-type(IPR001841)|Zinc finger, RING/FYVE/PHD-type(IPR013083)	2.78411	1.47722	4.44494e-05	0.00268907	yes	up	108.99	191.96	136.75	43.75	74.66	43.91	145.9	54.1067
MsG0180004622.01	Ribosomal protein L22e(IPR002671)|Ribosomal protein L22e superfamily(IPR038526)	0.222096	-2.17074	6.77155e-05	0.00360024	yes	down	8.32	13.26	14.53	29.4	115.91	45.17	12.0367	63.4933
MsG0180004772.01	Oxoglutarate/iron-dependent dioxygenase(IPR005123)|Non-haem dioxygenase N-terminal domain(IPR026992)|Isopenicillin N synthase-like(IPR027443)	2.95725	1.56426	0.000969457	0.0292474	yes	up	7.52	17.57	26.06	10.74	6.72	6.25	17.05	7.90333
MsG0180004776.01	Phospholipid/glycerol acyltransferase(IPR002123)	9.87375	3.3036	7.95042e-05	0.00405826	yes	up	1.28	1.92	0.9	0.1	0.24	0.09	1.36667	0.143333
MsG0180004809.01	Fungal lipase-like domain(IPR002921)|Alpha/Beta hydrolase fold(IPR029058)	2.43229	1.28231	0.00145843	0.0395626	yes	up	5.54	13.09	10.53	4.46	3.29	4.77	9.72	4.17333
MsG0180004817.01	Protein of unknown function DUF761, plant(IPR008480)	10.9808	3.45691	0.000312736	0.012142	yes	up	6.61	47.39	11.55	1.42	4.14	0.65	21.85	2.07
MsG0180004830.01	AP2/ERF domain(IPR001471)|DNA-binding domain superfamily(IPR016177)|AP2/ERF domain superfamily(IPR036955)	6.44432	2.68803	4.52126e-09	1.47703e-06	yes	up	28.79	62.14	37.42	6.61	3.89	10.31	42.7833	6.93667
MsG0180005018.01	Exostosin , C-terminal(IPR015338)|Glycosyl hydrolase, five-bladed beta-propellor domain superfamily(IPR023296)|Nucleotide-diphospho-sugar transferases(IPR029044)	2.80239	1.48666	8.94818e-06	0.000799324	yes	up	21.62	36.99	47.19	12.64	14.31	12.28	35.2667	13.0767
MsG0180005061.01	Major facilitator superfamily(IPR011701)|Major facilitator superfamily domain(IPR020846)|MFS transporter superfamily(IPR036259)|Peptidase S8 propeptide/proteinase inhibitor I9 superfamily(IPR037045)	0.352073	-1.50605	8.43835e-10	3.32704e-07	yes	down	20.95	25.52	24.69	77.98	66.45	78.43	23.72	74.2867
MsG0180005130.01	Extensin domain(IPR006706)	2.32297	1.21597	1.43228e-07	2.77571e-05	yes	up	2999.96	3265.98	2031.11	1270.56	745.72	1093.68	2765.68	1036.65
MsG0180005199.01	Zinc finger, GATA-type(IPR000679)|Zinc finger, NHR/GATA-type(IPR013088)|Transcription factor, GATA, plant(IPR016679)	2.55654	1.35419	0.000287502	0.0113747	yes	up	18.99	44.28	35.53	14.58	10.85	14.76	32.9333	13.3967
MsG0180005278.01	Protein kinase domain(IPR000719)|Leucine-rich repeat(IPR001611)|Protein kinase-like domain superfamily(IPR011009)|Leucine-rich repeat-containing N-terminal, plant-type(IPR013210)|Leucine rich repeat 4(IPR025875)|Leucine-rich repeat domain superfamily(IPR032675)	4.57863	2.19492	6.59857e-07	9.86248e-05	yes	up	3.97	9.02	8.03	1.51	2.05	1.19	7.00667	1.58333
MsG0180005279.01	Serine-threonine/tyrosine-protein kinase, catalytic domain(IPR001245)|Protein kinase-like domain superfamily(IPR011009)	5.57059	2.47783	3.73792e-11	2.67121e-08	yes	up	33.02	84.8	52.3	6.61	15.99	12.3	56.7067	11.6333
MsG0180005357.01	Chalcone/stilbene synthase, N-terminal(IPR001099)|Polyketide synthase, type III(IPR011141)|Chalcone/stilbene synthase, C-terminal(IPR012328)|Thiolase-like(IPR016039)|Chalcone/stilbene synthase, active site(IPR018088)	2.61459	1.38658	0.000757575	0.0244003	yes	up	78.94	101.78	103.07	29.15	59.71	22.47	94.5967	37.11
MsG0180005358.01	Chalcone/stilbene synthase, N-terminal(IPR001099)|Polyketide synthase, type III(IPR011141)|Chalcone/stilbene synthase, C-terminal(IPR012328)|Thiolase-like(IPR016039)|Chalcone/stilbene synthase, active site(IPR018088)	3.45138	1.78717	3.15943e-06	0.000340801	yes	up	38.69	61.55	70.82	11.57	22.83	15.15	57.02	16.5167
MsG0180005372.01	Plant peroxidase(IPR000823)|F-box domain(IPR001810)|Haem peroxidase, plant/fungal/bacterial(IPR002016)|Haem peroxidase(IPR010255)|Peroxidases heam-ligand binding site(IPR019793)|Peroxidase, active site(IPR019794)|Secretory peroxidase(IPR033905)	16.2236	4.02003	7.92729e-10	3.18037e-07	yes	up	5.38	21.23	5.3	0.5	0.7	0.85	10.6367	0.683333
MsG0180005394.01	Protein BYPASS-related(IPR008511)	3.41902	1.77358	0.000707455	0.0232444	yes	up	16.53	55.31	26.23	7.8	14.28	7.62	32.69	9.9
MsG0180005499.01	AP2/ERF domain(IPR001471)|DNA-binding domain superfamily(IPR016177)|AP2/ERF domain superfamily(IPR036955)	15.2666	3.93231	3.39309e-06	0.000362691	yes	up	2.6	12.02	13.79	1.62	0.39	0.22	9.47	0.743333
MsG0180005503.01	AP2/ERF domain(IPR001471)|DNA-binding domain superfamily(IPR016177)|AP2/ERF domain superfamily(IPR036955)	78.7208	6.29867	4.84954e-10	2.05369e-07	yes	up	12.85	108.53	81.75	0.19	2.28	0.18	67.71	0.883333
MsG0180005533.01	-	4.78867	2.25963	4.39494e-08	1.04691e-05	yes	up	5.09	4.25	6.05	2.02	7.02	4.26	5.13	4.43333
MsG0180005590.01	Bifunctional inhibitor/plant lipid transfer protein/seed storage helical domain(IPR016140)|Bifunctional inhibitor/plant lipid transfer protein/seed storage helical domain superfamily(IPR036312)	11.115	3.47444	0.00105732	0.0311984	yes	up	2.67	5.03	2.43	0.33	0	0.61	3.37667	0.313333
MsG0180005636.01	Leucine-rich repeat-containing N-terminal, plant-type(IPR013210)|Malectin-like carbohydrate-binding domain(IPR024788)|Leucine-rich repeat domain superfamily(IPR032675)	2.02826	1.02024	0.00191266	0.0487068	yes	up	52.62	84.21	83.41	32.28	49.36	32.53	73.4133	38.0567
MsG0180005648.01	Alpha/beta hydrolase fold-3(IPR013094)|Alpha/Beta hydrolase fold(IPR029058)	3.19027	1.67368	3.43119e-12	3.13857e-09	yes	up	144.73	194.38	162.69	45.74	54.01	63.05	167.267	54.2667
MsG0180005695.01	Protein kinase domain(IPR000719)|Gnk2-homologous domain(IPR002902)|Serine/threonine-protein kinase, active site(IPR008271)|Protein kinase-like domain superfamily(IPR011009)|Protein kinase, ATP binding site(IPR017441)|Gnk2-homologous domain superfamily(IPR038408)	3.15731	1.6587	0.000708745	0.0232533	yes	up	1.9	3.77	3.34	0.76	1.29	0.9	3.00333	0.983333
MsG0180005757.01	Xanthine/uracil/vitamin C permease(IPR006043)	2.90646	1.53927	8.94036e-07	0.000125428	yes	up	6.44	9.21	9.86	4.04	2.69	3.23	8.50333	3.32
MsG0180005776.01	PPM-type phosphatase, divalent cation binding(IPR000222)|PPM-type phosphatase domain(IPR001932)|PPM-type phosphatase domain superfamily(IPR036457)	3.0984	1.63152	9.24895e-06	0.000816621	yes	up	35.15	84.74	71.21	22.71	23.32	17.83	63.7	21.2867
MsG0180005838.01	Granulin(IPR000118)|Cysteine peptidase, cysteine active site(IPR000169)|Peptidase C1A, papain C-terminal(IPR000668)|Cathepsin propeptide inhibitor domain (I29)(IPR013201)|Cysteine peptidase, histidine active site(IPR025660)|Cysteine peptidase, asparagine active site(IPR025661)|Granulin superfamily(IPR037277)	11.9711	3.58149	0.00183969	0.0473228	yes	up	2.2	0.53	0.33	0.14	0.09	0.04	1.02	0.09
MsG0180005857.01	Exonuclease V(IPR019190)	2.62342	1.39145	5.62466e-05	0.00313719	yes	up	7.21	11.79	7.78	4.11	4.48	3.76	8.92667	4.11667
MsG0180005927.01	Protein of unknown function DUF1218(IPR009606)	118.87	6.89324	3.81596e-06	0.000398462	yes	up	6.84	8.42	4.47	0	0	0	6.57667	0
MsG0180005939.01	-	2.32159	1.21512	1.62903e-06	0.00020246	yes	up	28.27	44.03	40.93	15.96	16.99	17.63	37.7433	16.86
MsG0180005978.01	Glycolipid transfer protein domain(IPR014830)|Cullin repeat-like-containing domain superfamily(IPR016159)|Exocyst component Exo84, C-terminal(IPR032403)|Glycolipid transfer protein superfamily(IPR036497)	5.71618	2.51505	9.01189e-06	0.000801883	yes	up	2.55	8.32	10.14	1.59	1.23	1.02	7.00333	1.28
MsG0180005983.01	Vacuolar protein sorting-associated protein Ist1(IPR005061)	4.31244	2.1085	7.64444e-05	0.00395505	yes	up	9.97	10.11	16.33	1.2	4.81	1.34	12.1367	2.45
MsG0180006141.01	Transcription factor, MADS-box(IPR002100)|MADS SRF-like(IPR033897)|Transcription factor, MADS-box superfamily(IPR036879)	4.27475	2.09584	0.00183075	0.047199	yes	up	3.2	8.44	3.73	1.9	0.5	1.39	5.12333	1.26333
MsG0180006199.01	ABC transporter-like(IPR003439)|AAA+ ATPase domain(IPR003593)|ABC-2 type transporter(IPR013525)|ABC transporter, conserved site(IPR017871)|P-loop containing nucleoside triphosphate hydrolase(IPR027417)	2.46845	1.30361	0.00157577	0.0420559	yes	up	3.77	6.6	4.5	3	1.5	1.81	4.95667	2.10333
MsG0280006411.01	-	2.86653	1.51931	7.97481e-07	0.00011398	yes	up	193.78	150.27	271.29	77.61	85.67	59.08	205.113	74.12
MsG0280006455.01	Plant peroxidase(IPR000823)|Haem peroxidase, plant/fungal/bacterial(IPR002016)|Haem peroxidase(IPR010255)|Peroxidase, active site(IPR019794)|Secretory peroxidase(IPR033905)	6.34038	2.66457	5.81533e-05	0.00321997	yes	up	2.51	7.36	7.41	1.11	1.68	0.66	5.76	1.15
MsG0280006457.01	Plant peroxidase(IPR000823)|Haem peroxidase, plant/fungal/bacterial(IPR002016)|Haem peroxidase(IPR010255)|Peroxidase, active site(IPR019794)|Secretory peroxidase(IPR033905)	6.85411	2.77697	4.6869e-07	7.54789e-05	yes	up	4.5	7.24	9.35	1.83	0.75	0.92	7.03	1.16667
MsG0280006550.01	Cysteine-rich secretory protein, allergen V5/Tpx-1-related(IPR001283)|CAP domain(IPR014044)|Allergen V5/Tpx-1-related, conserved site(IPR018244)|Pathogenesis-related protein 1-like, SCP domain(IPR034111)|CAP superfamily(IPR035940)	6.61379	2.72548	0.00086477	0.0270158	yes	up	14.15	28.14	9.37	5.6	1.82	0.85	17.22	2.75667
MsG0280006622.01	HAT (Half-A-TPR) repeat(IPR003107)|Tetratricopeptide-like helical domain superfamily(IPR011990)	11.2327	3.48963	5.93887e-18	1.3581e-14	yes	up	6	5.33	8.56	0.55	0.9	0.4	6.63	0.616667
MsG0280006623.01	Protein of unknown function DUF761, plant(IPR008480)|Domain of unknown function DUF4408(IPR025520)	4.08603	2.0307	4.81955e-07	7.61553e-05	yes	up	9.2	18.73	19.61	3.59	3.6	4.9	15.8467	4.03
MsG0280006626.01	Cysteine-rich secretory protein, allergen V5/Tpx-1-related(IPR001283)|Ves allergen(IPR002413)|GroES-like superfamily(IPR011032)|Alcohol dehydrogenase, C-terminal(IPR013149)|Alcohol dehydrogenase, N-terminal(IPR013154)|CAP domain(IPR014044)|Quinone oxidoreductase PIG3(IPR014189)|Allergen V5/Tpx-1-related, conserved site(IPR018244)|Polyketide synthase, enoylreductase domain(IPR020843)|Pathogenesis-…	1136.06	10.1498	9.56549e-17	1.82286e-13	yes	up	11.51	10.62	9.44	0	0	0	10.5233	0
MsG0280006829.01	Myc-type, basic helix-loop-helix (bHLH) domain(IPR011598)|Helix-loop-helix DNA-binding domain superfamily(IPR036638)	2.84698	1.50943	1.00581e-05	0.000864693	yes	up	19.09	20.78	25.1	6.98	6.23	10.38	21.6567	7.86333
MsG0280006836.01	Ubiquitin domain(IPR000626)|Ribosomal protein L40e(IPR001975)|Zinc-binding ribosomal protein(IPR011332)|Ubiquitin conserved site(IPR019954)|Ubiquitin(IPR019956)|Ubiquitin-like domain superfamily(IPR029071)|Ribosomal protein L40e superfamily(IPR038587)	0.215296	-2.21561	7.13758e-22	3.26445e-18	yes	down	91.6	77.69	78.86	373	545.7	349.02	82.7167	422.573
MsG0280006882.01	Allergen Ole e 1, conserved site(IPR006040)	5.03874	2.33306	0.000351346	0.0133687	yes	up	5.6	4.38	4.02	0.33	1.39	1.11	4.66667	0.943333
MsG0280006936.01	Armadillo(IPR000225)|Armadillo-like helical(IPR011989)|Zinc finger, RING/FYVE/PHD-type(IPR013083)|Armadillo-type fold(IPR016024)	2.18668	1.12874	0.000840388	0.0264382	yes	up	37.01	65.08	57.66	24.56	35.42	18.17	53.25	26.05
MsG0280007019.01	Tify domain(IPR010399)|CO/COL/TOC1, conserved site(IPR018467)	62.9815	5.97686	0.00125262	0.035277	yes	up	0.05	1.21	12.05	0	0	0.33	4.43667	0.11
MsG0280007031.01	Oxoglutarate/iron-dependent dioxygenase(IPR005123)|Isopenicillin N synthase-like(IPR027443)	3.42006	1.77402	0.000634463	0.0213053	yes	up	2.32	3.69	3.44	0.87	0.89	1.23	3.15	0.996667
MsG0280007124.01	F-box domain(IPR001810)|F-box associated interaction domain(IPR017451)|Leucine-rich repeat domain superfamily(IPR032675)|F-box-like domain superfamily(IPR036047)	0.376094	-1.41083	1.03623e-05	0.000884196	yes	down	16.92	8.12	16.06	39.45	35.98	37.3	13.7	37.5767
MsG0280007129.01	F-box domain(IPR001810)|Galactose oxidase/kelch, beta-propeller(IPR011043)|F-box associated interaction domain(IPR017451)|F-box-like domain superfamily(IPR036047)	4.42004	2.14406	2.72708e-08	7.00706e-06	yes	up	17.05	25.48	27.5	2.82	5.61	6.56	23.3433	4.99667
MsG0280007169.01	Aminoacyl-tRNA synthetase, class II (D/K/N)(IPR004364)|OB-fold nucleic acid binding domain, AA-tRNA synthetase-type(IPR004365)|Nucleic acid-binding, OB-fold(IPR012340)|F-box associated interaction domain(IPR017451)|Lysyl-tRNA synthetase, class II, C-terminal(IPR018149)|F-box-like domain superfamily(IPR036047)	25.0662	4.64767	0.000914905	0.0279706	yes	up	0.11	3.68	4.59	0.33	0	0.07	2.79333	0.133333
MsG0280007230.01	Senescence regulator S40(IPR007608)	0.496177	-1.01107	0.00166539	0.0438759	yes	down	19.08	21.39	19.93	48.96	27.28	35.35	20.1333	37.1967
MsG0280007256.01	Phosphoadenosine phosphosulphate reductase(IPR002500)|Thioredoxin-independent 5'-adenylylsulphate reductase(IPR004508)|Rossmann-like alpha/beta/alpha sandwich fold(IPR014729)|Thioredoxin-like superfamily(IPR036249)	3.03755	1.60291	0.000301858	0.0118523	yes	up	12.06	23.1	31.47	11.11	5.33	6.52	22.21	7.65333
MsG0280007391.01	WRKY domain(IPR003657)|WRKY domain superfamily(IPR036576)	2.03217	1.02302	0.000805454	0.0256534	yes	up	74.21	119.18	84.44	36.86	59.15	45.6	92.61	47.2033
MsG0280007479.01	Cystatin domain(IPR000010)	2.75526	1.46219	6.4328e-06	0.000627596	yes	up	618.48	1158.04	625.03	311.55	281.18	321.77	800.517	304.833
MsG0280007481.01	DOMON domain(IPR005018)|Cytochrome b561/ferric reductase transmembrane(IPR006593)|Cytochrome b561 and DOMON domain-containing protein(IPR017214)	2.66332	1.41322	9.44904e-07	0.000130169	yes	up	81.55	147.27	141.61	49.46	44.27	50.86	123.477	48.1967
MsG0280007670.01	Plant peroxidase(IPR000823)|Haem peroxidase, plant/fungal/bacterial(IPR002016)|Haem peroxidase(IPR010255)|Peroxidases heam-ligand binding site(IPR019793)|Peroxidase, active site(IPR019794)|Secretory peroxidase(IPR033905)	2.39255	1.25855	0.000361957	0.0137268	yes	up	219.01	360.83	198.67	150.95	75.12	115.42	259.503	113.83
MsG0280007686.01	-	2.35307	1.23454	5.51915e-05	0.00310867	yes	up	165.62	321.5	209.32	111.01	87.72	109.58	232.147	102.77
MsG0280007688.01	Plant peroxidase(IPR000823)|Haem peroxidase, plant/fungal/bacterial(IPR002016)|Haem peroxidase(IPR010255)|Peroxidases heam-ligand binding site(IPR019793)|Secretory peroxidase(IPR033905)	2.34081	1.22701	0.000344384	0.0131695	yes	up	18.72	38.42	25.78	12.54	10.77	13.63	27.64	12.3133
MsG0280007716.01	Stress up-regulated Nod 19(IPR011692)	0.256504	-1.96294	0.000338841	0.0129793	yes	down	75.91	57.33	92.94	628.39	143	163.65	75.3933	311.68
MsG0280007840.01	WRKY domain(IPR003657)|WRKY domain superfamily(IPR036576)	3.20258	1.67923	8.40323e-06	0.000765598	yes	up	7.48	10.84	8.08	2.64	2.67	3.44	8.8	2.91667
MsG0280007868.01	Glycoside hydrolase family 17(IPR000490)|Glycoside hydrolase superfamily(IPR017853)	5.09341	2.34863	6.02172e-09	1.88637e-06	yes	up	83.44	171.38	86.27	33.57	17.62	19.66	113.697	23.6167
MsG0280007869.01	Glycoside hydrolase family 17(IPR000490)|Glycoside hydrolase superfamily(IPR017853)	4.53589	2.18139	3.8421e-23	2.92871e-19	yes	up	1183.04	743.14	828.72	229.17	191.24	214.65	918.3	211.687
MsG0280007906.01	Bet v I/Major latex protein(IPR000916)|START-like domain superfamily(IPR023393)|Bet v I type allergen(IPR024949)	2.50982	1.32758	0.00134852	0.0374182	yes	up	1956.43	2054.97	898.65	531.74	979.1	535.03	1636.68	681.957
MsG0280007907.01	Endonuclease/exonuclease/phosphatase superfamily(IPR036691)	3.04657	1.60718	0.00162879	0.0431156	yes	up	1696.47	1612.41	1357.79	192.35	777.99	603.38	1555.56	524.573
MsG0280007914.01	Bet v I/Major latex protein(IPR000916)|START-like domain superfamily(IPR023393)|Bet v I type allergen(IPR024949)	3.63707	1.86278	3.04728e-10	1.48267e-07	yes	up	1452.29	2410.69	1671.12	774.8	576.81	451.35	1844.7	600.987
MsG0280007915.01	Bet v I/Major latex protein(IPR000916)|START-like domain superfamily(IPR023393)|Bet v I type allergen(IPR024949)	2.09137	1.06445	0.000760749	0.0244681	yes	up	779.01	1365.11	1244.15	517.26	394.42	607.2	1129.42	506.293
MsG0280007934.01	Cysteine-rich secretory protein, allergen V5/Tpx-1-related(IPR001283)|CAP domain(IPR014044)|Allergen V5/Tpx-1-related, conserved site(IPR018244)|Pathogenesis-related protein 1-like, SCP domain(IPR034111)|CAP superfamily(IPR035940)	7.10554	2.82894	2.31857e-15	3.47961e-12	yes	up	1837.93	1967.08	918.19	190.27	282.1	213.5	1574.4	228.623
MsG0280008105.01	Uncharacterised protein family UPF0061(IPR003846)	111.945	6.80665	2.54429e-05	0.00181821	yes	up	0.81	0.56	0.2	0	0	0	0.523333	0
MsG0280008147.01	DNA-binding pseudobarrel domain superfamily(IPR015300)	0.177638	-2.49299	1.01676e-05	0.000870833	yes	down	0.82	1.7	2.63	6.69	10.35	13.04	1.71667	10.0267
MsG0280008220.01	Protein kinase domain(IPR000719)|Serine-threonine/tyrosine-protein kinase, catalytic domain(IPR001245)|Tyrosine-protein kinase, active site(IPR008266)|Serine/threonine-protein kinase, active site(IPR008271)|Protein kinase-like domain superfamily(IPR011009)|Protein kinase, ATP binding site(IPR017441)|S-receptor-like serine/threonine-protein kinase(IPR024171)	3.08925	1.62726	6.80121e-05	0.00360024	yes	up	17.16	44.46	38.17	9.96	13.46	10	33.2633	11.14
MsG0280008226.01	P-type ATPase(IPR001757)|Cation-transporting P-type ATPase, N-terminal(IPR004014)|P-type ATPase, subfamily IIIA(IPR006534)|P-type ATPase, A domain superfamily(IPR008250)|P-type ATPase, phosphorylation site(IPR018303)|P-type ATPase, transmembrane domain superfamily(IPR023298)|P-type ATPase, cytoplasmic domain N(IPR023299)|HAD-like superfamily(IPR036412)	0.457317	-1.12873	0.000892244	0.0275728	yes	down	22.99	36.58	29.11	97.73	44.9	61.26	29.56	67.9633
MsG0280008243.01	Toll/interleukin-1 receptor homology (TIR) domain(IPR000157)|NB-ARC(IPR002182)|P-loop containing nucleoside triphosphate hydrolase(IPR027417)|Toll/interleukin-1 receptor homology (TIR) domain superfamily(IPR035897)	11.1114	3.47396	2.1233e-09	7.70724e-07	yes	up	5.54	20.97	16.08	1.16	0.75	1.93	14.1967	1.28
MsG0280008245.01	-	15.3817	3.94314	6.42707e-07	9.66935e-05	yes	up	4.67	29.06	22.04	1.15	0.43	2.12	18.59	1.23333
MsG0280008287.01	Leucine-rich repeat(IPR001611)|Leucine-rich repeat domain superfamily(IPR032675)	0.184438	-2.43879	2.38278e-06	0.000271092	yes	down	5.32	4.06	8.56	19.24	58.37	26.32	5.98	34.6433
MsG0280008295.01	NB-ARC(IPR002182)|P-loop containing nucleoside triphosphate hydrolase(IPR027417)|Leucine-rich repeat domain superfamily(IPR032675)|Virus X resistance protein-like, coiled-coil domain(IPR038005)	3.18053	1.66927	0.00022836	0.00947755	yes	up	7.16	12.3	21.9	3.56	5.49	4.34	13.7867	4.46333
MsG0280008418.01	Six-bladed beta-propeller, TolB-like(IPR011042)|Strictosidine synthase, conserved region(IPR018119)	0.153448	-2.70417	0.00193042	0.0490499	yes	down	0.39	0.7	0.3	0.72	3.67	4.97	0.463333	3.12
MsG0280008436.01	Tify domain(IPR010399)|CO/COL/TOC1, conserved site(IPR018467)	3.70083	1.88785	1.57258e-05	0.00124006	yes	up	103.38	250.53	258.08	40.39	76.62	53.53	203.997	56.8467
MsG0280008659.01	Casparian strip membrane protein(IPR006459)|Domain of unknown function DUF588(IPR006702)	2.28075	1.18951	2.28502e-05	0.00166945	yes	up	41.54	56.42	55.98	30.3	18.83	21.4	51.3133	23.51
MsG0280008778.01	FMN-binding split barrel(IPR012349)|Pyridoxamine 5'-phosphate oxidase, Alr4036 family, FMN-binding domain(IPR024624)	87.7887	6.45596	4.50092e-05	0.0027086	yes	up	1.32	0.66	0.94	0	0	0	0.973333	0
MsG0280008857.01	Cytochrome P450(IPR001128)|Cytochrome P450, E-class, group I(IPR002401)|Cytochrome P450, conserved site(IPR017972)|Cytochrome P450 superfamily(IPR036396)	3.27721	1.71247	2.51809e-05	0.00181081	yes	up	29.27	53.16	37	15.41	6.66	16.12	39.81	12.73
MsG0280008861.01	-	186.677	7.5444	2.9478e-05	0.0020003	yes	up	0.27	31.02	18.8	0	0	0.25	16.6967	0.0833333
MsG0280008958.01	Domain of unknown function DUF223(IPR003871)|DNA helicase Pif1-like(IPR010285)|Nucleic acid-binding, OB-fold(IPR012340)|DNA recombination and repair protein Rad51-like, C-terminal(IPR013632)|Helitron helicase-like domain(IPR025476)|P-loop containing nucleoside triphosphate hydrolase(IPR027417)	6.60193	2.72289	0.000633188	0.0212937	yes	up	1.18	0.59	0.2	0.17	0.08	0.06	0.656667	0.103333
MsG0280009011.01	Protein kinase domain(IPR000719)|S-locus glycoprotein domain(IPR000858)|Bulb-type lectin domain(IPR001480)|PAN/Apple domain(IPR003609)|Protein kinase-like domain superfamily(IPR011009)|Protein kinase, ATP binding site(IPR017441)|S-receptor-like serine/threonine-protein kinase(IPR024171)|Bulb-type lectin domain superfamily(IPR036426)	8.67847	3.11744	3.15841e-06	0.000340801	yes	up	1.83	3.55	3.27	0.25	0.18	0.76	2.88333	0.396667
MsG0280009033.01	Leucine-rich repeat(IPR001611)|Leucine-rich repeat-containing N-terminal, plant-type(IPR013210)|Leucine-rich repeat domain superfamily(IPR032675)	7.85081	2.97284	0.000396853	0.0147325	yes	up	0.4	0.97	1.7	0.09	0.07	0.25	1.02333	0.136667
MsG0280009139.01	Very-long-chain 3-ketoacyl-CoA synthase(IPR012392)|FAE1/Type III polyketide synthase-like protein(IPR013601)|3-Oxoacyl-[acyl-carrier-protein (ACP)] synthase III, C-terminal(IPR013747)|Thiolase-like(IPR016039)	3.44717	1.78541	1.09014e-05	0.000923306	yes	up	24.91	50.61	40.32	13.98	13.93	7.02	38.6133	11.6433
MsG0280009158.01	GTD-binding domain(IPR007656)	4.33369	2.1156	4.14906e-07	6.8598e-05	yes	up	9.36	17.92	16.69	2.3	3.57	4.68	14.6567	3.51667
MsG0280009221.01	Myc-type, basic helix-loop-helix (bHLH) domain(IPR011598)|Helix-loop-helix DNA-binding domain superfamily(IPR036638)	0.314303	-1.66977	0.000448115	0.0163437	yes	down	8.28	4.5	5.63	12.61	15.91	32.68	6.13667	20.4
MsG0280009311.01	Aspartic peptidase domain superfamily(IPR021109)	5.75601	2.52507	8.1034e-05	0.00410884	yes	up	30.08	68.82	110.06	11.13	20.33	4.79	69.6533	12.0833
MsG0280009616.01	Bulb-type lectin domain(IPR001480)|Thaumatin(IPR001938)|Bulb-type lectin domain superfamily(IPR036426)|Osmotin/thaumatin-like superfamily(IPR037176)	60.8963	5.92828	0.00165736	0.0437146	yes	up	1.78	1.05	0.24	0	0	0	1.02333	0
MsG0280009630.01	Protein kinase domain(IPR000719)|Serine/threonine-protein kinase, active site(IPR008271)|Protein kinase-like domain superfamily(IPR011009)	4.75269	2.24875	1.74054e-06	0.000209487	yes	up	8.3	9.13	7.69	0.69	3.17	1.78	8.37333	1.88
MsG0280009665.01	Oxoglutarate/iron-dependent dioxygenase(IPR005123)|Non-haem dioxygenase N-terminal domain(IPR026992)|Isopenicillin N synthase-like(IPR027443)	0.207282	-2.27033	0.000116576	0.00556549	yes	down	12.62	11.3	4.62	106.32	26.93	28.98	9.51333	54.0767
MsG0280009863.01	Polyprenyl synthetase(IPR000092)|Isoprenoid synthase domain superfamily(IPR008949)|Solanesyl diphosphate synthase(IPR014120)|Polyprenyl synthetase, conserved site(IPR033749)	4.6366	2.21307	1.0469e-05	0.000889981	yes	up	15.7	14.13	8.06	3.14	4.47	1.49	12.63	3.03333
MsG0280009878.01	NB-ARC(IPR002182)|P-loop containing nucleoside triphosphate hydrolase(IPR027417)|Leucine-rich repeat domain superfamily(IPR032675)|Virus X resistance protein-like, coiled-coil domain(IPR038005)	9274.31	13.179	1.27825e-10	7.12952e-08	yes	up	16.24	131.84	10.25	0	0	0	52.7767	0
MsG0280009899.01	Proteinase inhibitor I3, Kunitz legume(IPR002160)|Kunitz inhibitor STI-like superfamily(IPR011065)	6.24939	2.64372	4.45935e-05	0.00269067	yes	up	13.73	55.49	20.92	4.63	6.56	3.76	30.0467	4.98333
MsG0280009942.01	Cytochrome P450(IPR001128)|Cytochrome P450, E-class, group I(IPR002401)|Cytochrome P450, conserved site(IPR017972)|Cytochrome P450 superfamily(IPR036396)	7.05965	2.8196	0.000218538	0.00922052	yes	up	15.72	138.84	26.85	13.32	8.66	4.89	60.47	8.95667
MsG0280010019.01	Bulb-type lectin domain(IPR001480)|Bulb-type lectin domain superfamily(IPR036426)	6.14437	2.61926	2.17903e-05	0.00161262	yes	up	3.89	3.2	1.39	0.61	2.83	0.43	2.82667	1.29
MsG0280010228.01	Knottin, scorpion toxin-like(IPR003614)|Defensin, plant(IPR008176)|Knottin, scorpion toxin-like superfamily(IPR036574)	279.765	8.12807	5.86239e-07	8.9374e-05	yes	up	39.4	419.04	3.92	0.23	0.33	1.17	154.12	0.576667
MsG0280010269.01	Protein kinase domain(IPR000719)|Serine-threonine/tyrosine-protein kinase, catalytic domain(IPR001245)|Serine/threonine-protein kinase, active site(IPR008271)|Protein kinase-like domain superfamily(IPR011009)|Protein kinase, ATP binding site(IPR017441)	2.07994	1.05654	0.00118453	0.0339022	yes	up	22.69	35.91	23.03	14.71	10.59	16.15	27.21	13.8167
MsG0280010299.01	EF-hand domain(IPR002048)|EF-hand domain pair(IPR011992)|EF-Hand 1, calcium-binding site(IPR018247)	5.32627	2.41313	0.000852781	0.0267509	yes	up	352.33	843.63	558.51	60.43	247.47	28.58	584.823	112.16
MsG0280010300.01	BURP domain(IPR004873)	4.43332	2.14839	5.6728e-07	8.70642e-05	yes	up	1097.51	1082.06	576.55	196.19	118.46	331.57	918.707	215.407
MsG0280010378.01	-	4.75532	2.24954	0.000103303	0.0050477	yes	up	35.89	107.93	80.8	10.37	27.7	10.65	74.8733	16.24
MsG0280010484.01	Prephenate dehydratase(IPR001086)|Bifunctional P-protein, chorismate mutase/prephenate dehydratase(IPR008242)|Prephenate dehydratase, conserved site(IPR018528)	3.11883	1.64101	5.61796e-05	0.00313719	yes	up	65.24	128.8	77.48	22.54	42.98	24.28	90.5067	29.9333
MsG0280010588.01	WRKY domain(IPR003657)|WRKY domain superfamily(IPR036576)	3.43559	1.78056	8.25827e-05	0.0041597	yes	up	4.23	13.44	9.7	2.66	3.28	2.36	9.12333	2.76667
[truncated: 584 more rows]

## Sheet: Table S3C
Table S3C DEGs in group of TACC1 vs TNP
[truncated: 2,143 more rows]

[truncated: 2 more sheets: Table S3D, Table S3E]
