# Supplementary material
Source: Research Square preprint supplement (doi:10.21203/rs.3.rs-9350064/v1)
Supplement: Supplementary file 4 [file 30d9cc8677becb72b5233f15.xlsx]

## Sheet: DP
Table S6A KEGG pathways co-regulated by transcriptome and metabolome integrated analysis
Pathway ID	Pathway Description	First Category	Second Category	Metabolite number	Rich factor_metab	P_value metabolite	P_adjust metabolite	Ratio_in_study Metabolite	Ratio_in_pop Metabolite	trans number	Rich factor_trans	P_value trans	P_adjust trans	Ratio_in_study trans	Ratio_in_pop trans
map00240	Pyrimidine metabolism	Metabolism	Nucleotide metabolism	12	0.1875	2.117e-11	5.82e-10	12/66	64/4954	1	0.00752	0.9166	1	1/289	133/15687
map00230	Purine metabolism	Metabolism	Nucleotide metabolism	10	0.099	6.47e-07	1.187e-05	10/66	101/4954	2	0.01449	0.7255	1	2/289	138/15687
map00941	Flavonoid biosynthesis	Metabolism	Biosynthesis of other secondary metabolites	7	0.0946	4.796e-05	0.000659	7/66	74/4954	7	0.0654	0.003642	0.03197	7/289	107/15687
map00943	Isoflavonoid biosynthesis	Metabolism	Biosynthesis of other secondary metabolites	5	0.0625	0.01003	0.069	4/66	64/4954	9	0.1667	5.55e-07	2.193e-05	9/289	54/15687
map02010	ABC transporters	Environmental Information Processing	Membrane transport	6	0.04348	0.00966	0.0759	6/66	138/4954	8	0.05	0.00967	0.0695	8/289	160/15687
map00944	Flavone and flavonol biosynthesis	Metabolism	Biosynthesis of other secondary metabolites	2	0.0588	0.02986	0.1825	3/66	51/4954	1	0.02703	0.4978	0.9364	1/289	37/15687
map00250	Alanine, aspartate and glutamate metabolism	Metabolism	Amino acid metabolism	2	0.0714	0.0529	0.291	2/66	28/4954	2	0.025	0.4353	0.8817	2/289	80/15687
map00660	C5-Branched dibasic acid metabolism	Metabolism	Carbohydrate metabolism	2	0.0571	0.0785	0.3599	2/66	35/4954	2	0.1667	0.01976	0.1201	2/289	12/15687
map00908	Zeatin biosynthesis	Metabolism	Metabolism of terpenoids and polyketides	2	0.0513	0.0946	0.3716	2/66	39/4954	1	0.02222	0.5674	1	1/289	45/15687
map00052	Galactose metabolism	Metabolism	Carbohydrate metabolism	2	0.04348	0.1246	0.4285	2/66	46/4954	3	0.03125	0.2602	0.6852	3/289	96/15687
map00260	Glycine, serine and threonine metabolism	Metabolism	Amino acid metabolism	2	0.04167	0.1336	0.4323	2/66	48/4954	2	0.01667	0.6519	1	2/289	120/15687
map00460	Cyanoamino acid metabolism	Metabolism	Metabolism of other amino acids	2	0.04444	0.1202	0.4408	2/66	45/4954	3	0.02941	0.2902	0.7396	3/289	102/15687
map00051	Fructose and mannose metabolism	Metabolism	Carbohydrate metabolism	2	0.03571	0.1708	0.5219	2/66	56/4954	1	0.01042	0.8331	1	1/289	96/15687
map00630	Glyoxylate and dicarboxylate metabolism	Metabolism	Carbohydrate metabolism	2	0.03125	0.2095	0.5487	2/66	64/4954	3	0.02419	0.4008	0.8333	3/289	124/15687
map00290	Valine, leucine and isoleucine biosynthesis	Metabolism	Amino acid metabolism	1	0.04348	0.2659	0.5626	1/66	23/4954	2	0.08	0.0769	0.3573	2/289	25/15687
map00020	Citrate cycle (TCA cycle)	Metabolism	Carbohydrate metabolism	1	0.05	0.2357	0.5636	1/66	20/4954	1	0.01389	0.7386	1	1/289	72/15687
map00960	Tropane, piperidine and pyridine alkaloid biosynthesis	Metabolism	Biosynthesis of other secondary metabolites	2	0.02778	0.249	0.5706	2/66	72/4954	6	0.0882	0.00156	0.02054	6/289	68/15687
map00330	Arginine and proline metabolism	Metabolism	Amino acid metabolism	2	0.02899	0.2341	0.5853	2/66	69/4954	1	0.01111	0.8133	1	1/289	90/15687
map00920	Sulfur metabolism	Metabolism	Energy metabolism	1	0.0303	0.3586	0.6163	1/66	33/4954	2	0.04444	0.201	0.6351	2/289	45/15687
map00520	Amino sugar and nucleotide sugar metabolism	Metabolism	Carbohydrate metabolism	2	0.01681	0.4739	0.6206	2/66	119/4954	11	0.04701	0.004173	0.03297	11/289	234/15687
map00010	Glycolysis / Gluconeogenesis	Metabolism	Carbohydrate metabolism	1	0.03125	0.3498	0.6207	1/66	32/4954	1	0.00565	0.9635	1	1/289	177/15687
map00400	Phenylalanine, tyrosine and tryptophan biosynthesis	Metabolism	Amino acid metabolism	1	0.02857	0.3757	0.6261	1/66	35/4954	1	0.01961	0.6132	1	1/289	51/15687
map00561	Glycerolipid metabolism	Metabolism	Lipid metabolism	1	0.02632	0.4005	0.6293	1/66	38/4954	4	0.03053	0.2224	0.6507	4/289	131/15687
map00480	Glutathione metabolism	Metabolism	Metabolism of other amino acids	1	0.02632	0.4005	0.6293	1/66	38/4954	3	0.01705	0.6327	0.9996	3/289	176/15687
map00900	Terpenoid backbone biosynthesis	Metabolism	Metabolism of terpenoids and polyketides	1	0.02174	0.4619	0.6352	1/66	46/4954	1	0.01266	0.7707	1	1/289	79/15687
map00564	Glycerophospholipid metabolism	Metabolism	Lipid metabolism	1	0.01786	0.5301	0.6627	1/66	56/4954	4	0.02564	0.3241	0.8002	4/289	156/15687
map00040	Pentose and glucuronate interconversions	Metabolism	Carbohydrate metabolism	1	0.01724	0.5427	0.6633	1/66	58/4954	6	0.02326	0.34	0.814	6/289	258/15687
map00061	Fatty acid biosynthesis	Metabolism	Lipid metabolism	1	0.01724	0.5427	0.6633	1/66	58/4954	1	0.01299	0.762	1	1/289	77/15687
map00940	Phenylpropanoid biosynthesis	Metabolism	Biosynthesis of other secondary metabolites	1	0.01724	0.5427	0.6633	1/66	58/4954	13	0.04906	0.001308	0.02067	13/289	265/15687
map00270	Cysteine and methionine metabolism	Metabolism	Amino acid metabolism	1	0.01493	0.5953	0.6682	1/66	67/4954	5	0.02941	0.2051	0.6232	5/289	170/15687
map00966	Glucosinolate biosynthesis	Metabolism	Biosynthesis of other secondary metabolites	1	0.01299	0.6468	0.7115	1/66	77/4954	2	0.1818	0.01667	0.1097	2/289	11/15687
map00906	Carotenoid biosynthesis	Metabolism	Metabolism of terpenoids and polyketides	1	0.00813	0.8118	0.8587	1/66	123/4954	3	0.0625	0.0583	0.3292	3/289	48/15687
map00999	Biosynthesis of various plant secondary metabolites	Metabolism	Biosynthesis of other secondary metabolites	1	0.00671	0.8685	0.8846	1/66	149/4954	5	0.04065	0.0772	0.3389	5/289	123/15687
map01232	Nucleotide metabolism	Metabolism	Global and overview maps	14	0.2414	8.41e-15	4.625e-13	14/66	58/4954	0
map01100	Metabolic pathways	Metabolism	Global and overview maps	54	0.01692	0.001996	0.02195	53/66	3132/4954	0
map00410	beta-Alanine metabolism	Metabolism	Metabolism of other amino acids	3	0.0938	0.0085	0.0779	3/66	32/4954	0
map00770	Pantothenate and CoA biosynthesis	Metabolism	Metabolism of cofactors and vitamins	2	0.0667	0.0599	0.2994	2/66	30/4954	0
map01230	Biosynthesis of amino acids	Metabolism	Global and overview maps	4	0.03101	0.0921	0.3896	4/66	129/4954	0
map00310	Lysine degradation	Metabolism	Amino acid metabolism	2	0.03571	0.1708	0.5219	2/66	56/4954	0
map01200	Carbon metabolism	Metabolism	Global and overview maps	3	0.02632	0.1936	0.5323	3/66	114/4954	0
map00565	Ether lipid metabolism	Metabolism	Lipid metabolism	1	0.04	0.2855	0.5414	1/66	25/4954	0
map00740	Riboflavin metabolism	Metabolism	Metabolism of cofactors and vitamins	1	0.04167	0.2758	0.5417	1/66	24/4954	0
map01210	2-Oxocarboxylic acid metabolism	Metabolism	Global and overview maps	3	0.02083	0.3007	0.5513	3/66	144/4954	0
map00965	Betalain biosynthesis	Metabolism	Biosynthesis of other secondary metabolites	1	0.04348	0.2659	0.5626	1/66	23/4954	0
map00232	Caffeine metabolism	Metabolism	Biosynthesis of other secondary metabolites	1	0.04545	0.256	0.5632	1/66	22/4954	0
map00261	Monobactam biosynthesis	Metabolism	Biosynthesis of other secondary metabolites	1	0.02564	0.4085	0.6072	1/66	39/4954	0
map00300	Lysine biosynthesis	Metabolism	Amino acid metabolism	1	0.02857	0.3757	0.6261	1/66	35/4954	0
map00340	Histidine metabolism	Metabolism	Amino acid metabolism	1	0.02128	0.4692	0.6294	1/66	47/4954	0
map01240	Biosynthesis of cofactors	Metabolism	Global and overview maps	5	0.0152	0.4485	0.6325	5/66	329/4954	0
map00902	Monoterpenoid biosynthesis	Metabolism	Metabolism of terpenoids and polyketides	1	0.01639	0.561	0.6428	1/66	61/4954	0
map00785	Lipoic acid metabolism	Metabolism	Metabolism of cofactors and vitamins	1	0.02273	0.4472	0.6472	1/66	44/4954	0
map00760	Nicotinate and nicotinamide metabolism	Metabolism	Metabolism of cofactors and vitamins	1	0.01818	0.5237	0.6699	1/66	55/4954	0
map01250	Biosynthesis of nucleotide sugars	Metabolism	Global and overview maps	2	0.00995	0.7557	0.815	2/66	201/4954	0
map00950	Isoquinoline alkaloid biosynthesis	Metabolism	Biosynthesis of other secondary metabolites	1	0.00775	0.8268	0.858	1/66	129/4954	0
map01110	Biosynthesis of secondary metabolites	Metabolism	Global and overview maps	26	0.01144	0.8832	0.8832	26/66	2273/4954	0
map04016	MAPK signaling pathway - plant	Environmental Information Processing	Signal transduction	0						20	0.0769	7.69e-08	6.07e-06	20/289	260/15687
map04626	Plant-pathogen interaction	Organismal Systems	Environmental adaptation	0						23	0.0508	1.174e-05	0.0003093	23/289	453/15687
map04075	Plant hormone signal transduction	Environmental Information Processing	Signal transduction	0						25	0.04181	0.0001212	0.002393	25/289	598/15687
map04712	Circadian rhythm - plant	Organismal Systems	Environmental adaptation	0						6	0.0822	0.002248	0.02537	6/289	73/15687
map00062	Fatty acid elongation	Metabolism	Lipid metabolism	0						5	0.0893	0.003636	0.03591	5/289	56/15687
map00910	Nitrogen metabolism	Metabolism	Energy metabolism	0						3	0.0625	0.0583	0.3292	3/289	48/15687
map04130	SNARE interactions in vesicular transport	Genetic Information Processing	Folding, sorting and degradation	0						3	0.0566	0.074	0.3653	3/289	53/15687
map00543	Exopolysaccharide biosynthesis	Metabolism	Glycan biosynthesis and metabolism	0						1	0.2	0.0888	0.3692	1/289	5/15687
map00592	alpha-Linolenic acid metabolism	Metabolism	Lipid metabolism	0						4	0.04167	0.1013	0.3811	4/289	96/15687
map00073	Cutin, suberine and wax biosynthesis	Metabolism	Lipid metabolism	0						3	0.05	0.0986	0.3895	3/289	60/15687
map00053	Ascorbate and aldarate metabolism	Metabolism	Carbohydrate metabolism	0						4	0.03846	0.1257	0.4316	4/289	104/15687
map00901	Indole alkaloid biosynthesis	Metabolism	Biosynthesis of other secondary metabolites	0						1	0.1429	0.1221	0.4383	1/289	7/15687
map00860	Porphyrin metabolism	Metabolism	Metabolism of cofactors and vitamins	0						3	0.0411	0.1515	0.4988	3/289	73/15687
map00904	Diterpenoid biosynthesis	Metabolism	Metabolism of terpenoids and polyketides	0						2	0.04082	0.2281	0.6436	2/289	49/15687
map00500	Starch and sucrose metabolism	Metabolism	Carbohydrate metabolism	0						7	0.025	0.259	0.7054	7/289	280/15687
map00470	D-Amino acid metabolism	Metabolism	Metabolism of other amino acids	0						1	0.04167	0.3602	0.8369	1/289	24/15687
map04070	Phosphatidylinositol signaling system	Environmental Information Processing	Signal transduction	0						3	0.02542	0.3709	0.8371	3/289	118/15687
map00750	Vitamin B6 metabolism	Metabolism	Metabolism of cofactors and vitamins	0						1	0.03846	0.3836	0.8418	1/289	26/15687
map00360	Phenylalanine metabolism	Metabolism	Amino acid metabolism	0						2	0.02703	0.3969	0.8474	2/289	74/15687
map00190	Oxidative phosphorylation	Metabolism	Energy metabolism	0						5	0.02041	0.4721	0.9097	5/289	245/15687
map00450	Selenocompound metabolism	Metabolism	Metabolism of other amino acids	0						1	0.02941	0.4689	0.9262	1/289	34/15687
map00220	Arginine biosynthesis	Metabolism	Amino acid metabolism	0						1	0.01754	0.6542	0.9938	1/289	57/15687
map00905	Brassinosteroid biosynthesis	Metabolism	Metabolism of terpenoids and polyketides	0						1	0.002387	0.9996	0.9996	1/289	419/15687
map00620	Pyruvate metabolism	Metabolism	Carbohydrate metabolism	0						3	0.01852	0.5765	1	3/289	162/15687
map00790	Folate biosynthesis	Metabolism	Metabolism of cofactors and vitamins	0						1	0.02128	0.5832	1	1/289	47/15687
map00591	Linoleic acid metabolism	Metabolism	Lipid metabolism	0						1	0.02128	0.5832	1	1/289	47/15687
map04145	Phagosome	Cellular Processes	Transport and catabolism	0						2	0.01835	0.5996	1	2/289	109/15687
map00640	Propanoate metabolism	Metabolism	Carbohydrate metabolism	0						1	0.01961	0.6132	1	1/289	51/15687
map00510	N-Glycan biosynthesis	Metabolism	Glycan biosynthesis and metabolism	0						1	0.01471	0.7184	1	1/289	68/15687
map03008	Ribosome biogenesis in eukaryotes	Genetic Information Processing	Translation	0						2	0.0137	0.7538	1	2/289	146/15687
map00970	Aminoacyl-tRNA biosynthesis	Genetic Information Processing	Translation	0						2	0.01351	0.7604	1	2/289	148/15687
map03030	DNA replication	Genetic Information Processing	Replication and repair	0						1	0.0122	0.7832	1	1/289	82/15687
map04141	Protein processing in endoplasmic reticulum	Genetic Information Processing	Folding, sorting and degradation	0						7	0.01455	0.7871	1	7/289	481/15687
map00071	Fatty acid degradation	Metabolism	Lipid metabolism	0						1	0.0119	0.7912	1	1/289	84/15687
map03410	Base excision repair	Genetic Information Processing	Replication and repair	0						1	0.01163	0.7988	1	1/289	86/15687
map00710	Carbon fixation in photosynthetic organisms	Metabolism	Energy metabolism	0						1	0.00893	0.8763	1	1/289	112/15687
map04146	Peroxisome	Cellular Processes	Transport and catabolism	0						1	0.008	0.9031	1	1/289	125/15687
map03420	Nucleotide excision repair	Genetic Information Processing	Replication and repair	0						1	0.00787	0.9066	1	1/289	127/15687
map00195	Photosynthesis	Metabolism	Energy metabolism	0						1	0.00704	0.9295	1	1/289	142/15687
map03082	ATP-dependent chromatin remodeling	Genetic Information Processing	Chromosome	0						1	0.00606	0.9542	1	1/289	165/15687
map03015	mRNA surveillance pathway	Genetic Information Processing	Translation	0						1	0.00581	0.9599	1	1/289	172/15687
map04144	Endocytosis	Cellular Processes	Transport and catabolism	0						3	0.0085	0.96	1	3/289	353/15687
map03040	Spliceosome	Genetic Information Processing	Transcription	0						3	0.00703	0.9863	1	3/289	427/15687
map03013	Nucleocytoplasmic transport	Genetic Information Processing	Translation	0						1	0.003922	0.9916	1	1/289	255/15687
map03010	Ribosome	Genetic Information Processing	Translation	0						3	0.00593	0.9959	1	3/289	506/15687
map04120	Ubiquitin mediated proteolysis	Genetic Information Processing	Folding, sorting and degradation	0						1	0.002688	0.9991	1	1/289	372/15687

## Sheet: ACC1
Table S6B KEGG pathways co-regulated by transcriptome and metabolome integrated analysis
Pathway ID	Pathway Description	First Category	Second Category	Metabolite number	Rich factor_metab	P_value metabolite	P_adjust metabolite	Ratio_in_study Metabolite	Ratio_in_pop Metabolite	trans number	Rich factor_trans	P_value trans	P_adjust trans	Ratio_in_study trans	Ratio_in_pop trans
map00943	Isoflavonoid biosynthesis	Metabolism	Biosynthesis of other secondary metabolites	9	0.1406	2.852e-07	1.654e-05	9/73	64/4954	13	0.2407	2.568e-06	0.000149	13/809	54/15687
map00941	Flavonoid biosynthesis	Metabolism	Biosynthesis of other secondary metabolites	8	0.1081	1.042e-05	0.0003022	8/73	74/4954	9	0.0841	0.1008	0.4677	9/809	107/15687
map00250	Alanine, aspartate and glutamate metabolism	Metabolism	Amino acid metabolism	4	0.1429	0.00068	0.01315	4/73	28/4954	2	0.025	0.9231	1	2/809	80/15687
map00410	beta-Alanine metabolism	Metabolism	Metabolism of other amino acids	4	0.125	0.001142	0.01656	4/73	32/4954	2	0.03125	0.8494	1	2/809	64/15687
map00240	Pyrimidine metabolism	Metabolism	Nucleotide metabolism	5	0.0781	0.002348	0.02723	5/73	64/4954	5	0.03759	0.8222	1	5/809	133/15687
map00230	Purine metabolism	Metabolism	Nucleotide metabolism	6	0.0594	0.003494	0.03377	6/73	101/4954	5	0.03623	0.8457	1	5/809	138/15687
map04075	Plant hormone signal transduction	Environmental Information Processing	Signal transduction	2	0.1667	0.01285	0.0677	2/73	12/4954	58	0.097	2.581e-06	9.98e-05	58/809	598/15687
map00770	Pantothenate and CoA biosynthesis	Metabolism	Metabolism of cofactors and vitamins	3	0.1	0.00937	0.0679	3/73	30/4954	3	0.04918	0.6156	1	3/809	61/15687
map00600	Sphingolipid metabolism	Metabolism	Lipid metabolism	3	0.0857	0.01433	0.0693	3/73	35/4954	1	0.01724	0.9539	1	1/809	58/15687
map00785	Lipoic acid metabolism	Metabolism	Metabolism of cofactors and vitamins	3	0.0682	0.02641	0.1178	3/73	44/4954	2	0.0556	0.5606	1	2/809	36/15687
map00290	Valine, leucine and isoleucine biosynthesis	Metabolism	Amino acid metabolism	2	0.087	0.04439	0.1716	2/73	23/4954	1	0.04	0.7341	1	1/809	25/15687
map04136	Autophagy - other	Cellular Processes	Transport and catabolism	1	0.3333	0.04357	0.1805	1/73	3/4954	3	0.0638	0.4396	1	3/809	47/15687
map00330	Arginine and proline metabolism	Metabolism	Amino acid metabolism	3	0.04348	0.0807	0.2926	3/73	69/4954	4	0.04444	0.6887	1	4/809	90/15687
map00563	Glycosylphosphatidylinositol (GPI)-anchor biosynthesis	Metabolism	Glycan biosynthesis and metabolism	1	0.1429	0.0988	0.3369	1/73	7/4954	1	0.01887	0.9399	1	1/809	53/15687
map00908	Zeatin biosynthesis	Metabolism	Metabolism of terpenoids and polyketides	2	0.0513	0.112	0.361	2/73	39/4954	2	0.04444	0.6823	1	2/809	45/15687
map00280	Valine, leucine and isoleucine degradation	Metabolism	Amino acid metabolism	2	0.04762	0.1266	0.3673	2/73	42/4954	11	0.1447	0.001707	0.02829	11/809	76/15687
map00640	Propanoate metabolism	Metabolism	Carbohydrate metabolism	2	0.04878	0.1217	0.3716	2/73	41/4954	4	0.0784	0.2682	0.8642	4/809	51/15687
map00460	Cyanoamino acid metabolism	Metabolism	Metabolism of other amino acids	2	0.04444	0.1417	0.3913	2/73	45/4954	7	0.0686	0.2733	0.8568	7/809	102/15687
map00360	Phenylalanine metabolism	Metabolism	Amino acid metabolism	2	0.04082	0.1622	0.3921	2/73	49/4954	2	0.02703	0.9007	1	2/809	74/15687
map00260	Glycine, serine and threonine metabolism	Metabolism	Amino acid metabolism	2	0.04167	0.1571	0.396	2/73	48/4954	5	0.04167	0.7477	1	5/809	120/15687
map00944	Flavone and flavonol biosynthesis	Metabolism	Biosynthesis of other secondary metabolites	1	0.03922	0.1727	0.4008	2/73	51/4954	5	0.1351	0.04003	0.2444	5/809	37/15687
map00061	Fatty acid biosynthesis	Metabolism	Lipid metabolism	2	0.03448	0.2102	0.4516	2/73	58/4954	4	0.0519	0.5664	1	4/809	77/15687
map00630	Glyoxylate and dicarboxylate metabolism	Metabolism	Carbohydrate metabolism	2	0.03125	0.243	0.4859	2/73	64/4954	7	0.0565	0.4587	1	7/809	124/15687
map00020	Citrate cycle (TCA cycle)	Metabolism	Carbohydrate metabolism	1	0.05	0.2573	0.4975	1/73	20/4954	3	0.04167	0.7251	1	3/809	72/15687
map00740	Riboflavin metabolism	Metabolism	Metabolism of cofactors and vitamins	1	0.04167	0.3003	0.5278	1/73	24/4954	1	0.03846	0.7479	1	1/809	26/15687
map02010	ABC transporters	Environmental Information Processing	Membrane transport	3	0.02174	0.3325	0.5357	3/73	138/4954	11	0.0688	0.2039	0.7391	11/809	160/15687
map00966	Glucosinolate biosynthesis	Metabolism	Biosynthesis of other secondary metabolites	2	0.02597	0.3143	0.5362	2/73	77/4954	1	0.0909	0.4416	1	1/809	11/15687
map00590	Arachidonic acid metabolism	Metabolism	Lipid metabolism	2	0.02532	0.3252	0.539	2/73	79/4954	4	0.1905	0.02083	0.1611	4/809	21/15687
map00220	Arginine biosynthesis	Metabolism	Amino acid metabolism	1	0.04348	0.2898	0.5422	1/73	23/4954	2	0.03509	0.8001	1	2/809	57/15687
map00562	Inositol phosphate metabolism	Metabolism	Carbohydrate metabolism	1	0.02128	0.5039	0.6959	1/73	47/4954	7	0.0625	0.3566	1	7/809	112/15687
map00592	alpha-Linolenic acid metabolism	Metabolism	Lipid metabolism	1	0.02273	0.4811	0.6976	1/73	44/4954	6	0.0625	0.3751	1	6/809	96/15687
map00040	Pentose and glucuronate interconversions	Metabolism	Carbohydrate metabolism	1	0.01724	0.5794	0.7001	1/73	58/4954	14	0.0543	0.4616	1	14/809	258/15687
map00052	Galactose metabolism	Metabolism	Carbohydrate metabolism	1	0.02174	0.4964	0.7023	1/73	46/4954	6	0.0625	0.3751	1	6/809	96/15687
map00053	Ascorbate and aldarate metabolism	Metabolism	Carbohydrate metabolism	1	0.01754	0.573	0.7071	1/73	57/4954	7	0.0673	0.2896	0.8841	7/809	104/15687
map00902	Monoterpenoid biosynthesis	Metabolism	Metabolism of terpenoids and polyketides	1	0.01639	0.5979	0.7078	1/73	61/4954	1	0.03846	0.7479	1	1/809	26/15687
map00906	Carotenoid biosynthesis	Metabolism	Metabolism of terpenoids and polyketides	2	0.01626	0.5456	0.7193	2/73	123/4954	7	0.1458	0.01099	0.1158	7/809	48/15687
map00970	Aminoacyl-tRNA biosynthesis	Genetic Information Processing	Translation	1	0.01923	0.5397	0.728	1/73	52/4954	5	0.03378	0.885	1	5/809	148/15687
map00310	Lysine degradation	Metabolism	Amino acid metabolism	1	0.01786	0.5666	0.7302	1/73	56/4954	2	0.0339	0.8155	1	2/809	59/15687
map00564	Glycerophospholipid metabolism	Metabolism	Lipid metabolism	1	0.01786	0.5666	0.7302	1/73	56/4954	13	0.0833	0.0599	0.316	13/809	156/15687
map00130	Ubiquinone and other terpenoid-quinone biosynthesis	Metabolism	Metabolism of cofactors and vitamins	1	0.01408	0.6541	0.7587	1/73	71/4954	4	0.0526	0.5559	1	4/809	76/15687
map00350	Tyrosine metabolism	Metabolism	Amino acid metabolism	1	0.01282	0.6887	0.7833	1/73	78/4954	3	0.0536	0.5571	1	3/809	56/15687
map00380	Tryptophan metabolism	Metabolism	Amino acid metabolism	1	0.01205	0.7114	0.7934	1/73	83/4954	2	0.02222	0.9502	1	2/809	90/15687
map00520	Amino sugar and nucleotide sugar metabolism	Metabolism	Carbohydrate metabolism	1	0.0084	0.8327	0.8944	1/73	119/4954	17	0.0726	0.0976	0.4717	17/809	234/15687
map00999	Biosynthesis of various plant secondary metabolites	Metabolism	Biosynthesis of other secondary metabolites	1	0.00671	0.8942	0.9261	1/73	149/4954	8	0.065	0.3015	0.8967	8/809	123/15687
map00860	Porphyrin metabolism	Metabolism	Metabolism of cofactors and vitamins	1	0.00671	0.8942	0.9261	1/73	149/4954	11	0.1507	0.00122	0.02359	11/809	73/15687
map01100	Metabolic pathways	Metabolism	Global and overview maps	57	0.0182	0.004519	0.03745	57/73	3132/4954	0
map01232	Nucleotide metabolism	Metabolism	Global and overview maps	4	0.069	0.01011	0.0651	4/73	58/4954	0
map01230	Biosynthesis of amino acids	Metabolism	Global and overview maps	6	0.04651	0.01135	0.0658	6/73	129/4954	0
map00340	Histidine metabolism	Metabolism	Amino acid metabolism	2	0.04255	0.1519	0.4004	2/73	47/4954	0
map01240	Biosynthesis of cofactors	Metabolism	Global and overview maps	7	0.02128	0.2089	0.466	7/73	329/4954	0
map01200	Carbon metabolism	Metabolism	Global and overview maps	3	0.02632	0.2358	0.4884	3/73	114/4954	0
map00965	Betalain biosynthesis	Metabolism	Biosynthesis of other secondary metabolites	1	0.04348	0.2898	0.5422	1/73	23/4954	0
map01210	2-Oxocarboxylic acid metabolism	Metabolism	Global and overview maps	3	0.02083	0.3569	0.5448	3/73	144/4954	0
map00780	Biotin metabolism	Metabolism	Metabolism of cofactors and vitamins	1	0.03448	0.3506	0.5496	1/73	29/4954	0
map00660	C5-Branched dibasic acid metabolism	Metabolism	Carbohydrate metabolism	1	0.02857	0.4063	0.6042	1/73	35/4954	0
map01110	Biosynthesis of secondary metabolites	Metabolism	Global and overview maps	30	0.01364	0.76	0.8318	31/73	2273/4954	0
map01212	Fatty acid metabolism	Metabolism	Global and overview maps	1	0.0082	0.8402	0.886	1/73	122/4954	0
map01250	Biosynthesis of nucleotide sugars	Metabolism	Global and overview maps	1	0.004975	0.9525	0.9525	1/73	201/4954	0
map04712	Circadian rhythm - plant	Organismal Systems	Environmental adaptation	0						18	0.2466	2.078e-08	2.41e-06	18/809	73/15687
map04016	MAPK signaling pathway - plant	Environmental Information Processing	Signal transduction	0						31	0.1192	1.202e-05	0.0003485	31/809	260/15687
map04626	Plant-pathogen interaction	Organismal Systems	Environmental adaptation	0						41	0.0905	0.0003364	0.00781	41/809	453/15687
map00500	Starch and sucrose metabolism	Metabolism	Carbohydrate metabolism	0						26	0.0929	0.002752	0.03547	26/809	280/15687
map00030	Pentose phosphate pathway	Metabolism	Carbohydrate metabolism	0						11	0.1375	0.002592	0.03759	11/809	80/15687
map00073	Cutin, suberine and wax biosynthesis	Metabolism	Lipid metabolism	0						8	0.1333	0.01149	0.1111	8/809	60/15687
map00710	Carbon fixation in photosynthetic organisms	Metabolism	Energy metabolism	0						12	0.1071	0.01274	0.1137	12/809	112/15687
map00591	Linoleic acid metabolism	Metabolism	Lipid metabolism	0						7	0.1489	0.00981	0.1138	7/809	47/15687
map00561	Glycerolipid metabolism	Metabolism	Lipid metabolism	0						13	0.0992	0.01773	0.1469	13/809	131/15687
map00062	Fatty acid elongation	Metabolism	Lipid metabolism	0						7	0.125	0.02433	0.1568	7/809	56/15687
map00543	Exopolysaccharide biosynthesis	Metabolism	Glycan biosynthesis and metabolism	0						2	0.4	0.02394	0.1735	2/809	5/15687
map00232	Caffeine metabolism	Metabolism	Biosynthesis of other secondary metabolites	0						2	0.4	0.02394	0.1735	2/809	5/15687
map04070	Phosphatidylinositol signaling system	Environmental Information Processing	Signal transduction	0						11	0.0932	0.04117	0.2388	11/809	118/15687
map00051	Fructose and mannose metabolism	Metabolism	Carbohydrate metabolism	0						9	0.0938	0.0593	0.3274	9/809	96/15687
map00920	Sulfur metabolism	Metabolism	Energy metabolism	0						5	0.1111	0.0806	0.4064	5/809	45/15687
map00270	Cysteine and methionine metabolism	Metabolism	Amino acid metabolism	0						13	0.0765	0.101	0.4507	13/809	170/15687
map04146	Peroxisome	Cellular Processes	Transport and catabolism	0						10	0.08	0.1115	0.479	10/809	125/15687
map00010	Glycolysis / Gluconeogenesis	Metabolism	Carbohydrate metabolism	0						13	0.0734	0.1267	0.5249	13/809	177/15687
map00940	Phenylpropanoid biosynthesis	Metabolism	Biosynthesis of other secondary metabolites	0						18	0.0679	0.1421	0.5685	18/809	265/15687
map00750	Vitamin B6 metabolism	Metabolism	Metabolism of cofactors and vitamins	0						3	0.1154	0.148	0.5724	3/809	26/15687
map00760	Nicotinate and nicotinamide metabolism	Metabolism	Metabolism of cofactors and vitamins	0						4	0.0889	0.2009	0.7517	4/809	45/15687
map00196	Photosynthesis - antenna proteins	Metabolism	Energy metabolism	0						2	0.1111	0.2371	0.8088	2/809	18/15687
map00904	Diterpenoid biosynthesis	Metabolism	Metabolism of terpenoids and polyketides	0						4	0.0816	0.2452	0.8128	4/809	49/15687
map00910	Nitrogen metabolism	Metabolism	Energy metabolism	0						4	0.0833	0.2339	0.8223	4/809	48/15687
map00901	Indole alkaloid biosynthesis	Metabolism	Biosynthesis of other secondary metabolites	0						1	0.1429	0.3098	0.8983	1/809	7/15687
map03010	Ribosome	Genetic Information Processing	Translation	0						3	0.00593	1	1	3/809	506/15687
map00945	Stilbenoid, diarylheptanoid and gingerol biosynthesis	Metabolism	Biosynthesis of other secondary metabolites	0						2	0.0769	0.3908	1	2/809	26/15687
map00480	Glutathione metabolism	Metabolism	Metabolism of other amino acids	0						10	0.0568	0.4229	1	10/809	176/15687
map00071	Fatty acid degradation	Metabolism	Lipid metabolism	0						5	0.0595	0.4376	1	5/809	84/15687
map00960	Tropane, piperidine and pyridine alkaloid biosynthesis	Metabolism	Biosynthesis of other secondary metabolites	0						4	0.0588	0.4679	1	4/809	68/15687
map00440	Phosphonate and phosphinate metabolism	Metabolism	Metabolism of other amino acids	0						1	0.0769	0.4977	1	1/809	13/15687
map00450	Selenocompound metabolism	Metabolism	Metabolism of other amino acids	0						2	0.0588	0.5295	1	2/809	34/15687
map00650	Butanoate metabolism	Metabolism	Carbohydrate metabolism	0						2	0.0541	0.5757	1	2/809	37/15687
map00603	Glycosphingolipid biosynthesis - globo and isoglobo series	Metabolism	Glycan biosynthesis and metabolism	0						1	0.04762	0.6713	1	1/809	21/15687
map00565	Ether lipid metabolism	Metabolism	Lipid metabolism	0						2	0.04444	0.6823	1	2/809	45/15687
map00261	Monobactam biosynthesis	Metabolism	Biosynthesis of other secondary metabolites	0						1	0.04348	0.7044	1	1/809	23/15687
map00790	Folate biosynthesis	Metabolism	Metabolism of cofactors and vitamins	0						2	0.04255	0.7052	1	2/809	47/15687
map00100	Steroid biosynthesis	Metabolism	Lipid metabolism	0						2	0.04082	0.7268	1	2/809	49/15687
map00620	Pyruvate metabolism	Metabolism	Carbohydrate metabolism	0						7	0.04321	0.7363	1	7/809	162/15687
map00400	Phenylalanine, tyrosine and tryptophan biosynthesis	Metabolism	Amino acid metabolism	0						2	0.03922	0.747	1	2/809	51/15687
map00730	Thiamine metabolism	Metabolism	Metabolism of cofactors and vitamins	0						1	0.03846	0.7479	1	1/809	26/15687
map04130	SNARE interactions in vesicular transport	Genetic Information Processing	Folding, sorting and degradation	0						2	0.03774	0.7659	1	2/809	53/15687
map00531	Glycosaminoglycan degradation	Metabolism	Glycan biosynthesis and metabolism	0						1	0.03571	0.7732	1	1/809	28/15687
map00900	Terpenoid backbone biosynthesis	Metabolism	Metabolism of terpenoids and polyketides	0						3	0.03797	0.781	1	3/809	79/15687
map00300	Lysine biosynthesis	Metabolism	Amino acid metabolism	0						1	0.03448	0.785	1	1/809	29/15687
map00430	Taurine and hypotaurine metabolism	Metabolism	Metabolism of other amino acids	0						1	0.02941	0.8351	1	1/809	34/15687
map00511	Other glycan degradation	Metabolism	Glycan biosynthesis and metabolism	0						1	0.02857	0.8436	1	1/809	35/15687
map00670	One carbon pool by folate	Metabolism	Metabolism of cofactors and vitamins	0						2	0.02857	0.8825	1	2/809	70/15687
map00909	Sesquiterpenoid and triterpenoid biosynthesis	Metabolism	Metabolism of terpenoids and polyketides	0						2	0.02667	0.9048	1	2/809	75/15687
map03430	Mismatch repair	Genetic Information Processing	Replication and repair	0						1	0.01852	0.943	1	1/809	54/15687
map01040	Biosynthesis of unsaturated fatty acids	Metabolism	Lipid metabolism	0						1	0.01852	0.943	1	1/809	54/15687
map03008	Ribosome biogenesis in eukaryotes	Genetic Information Processing	Translation	0						4	0.0274	0.9472	1	4/809	146/15687
map04120	Ubiquitin mediated proteolysis	Genetic Information Processing	Folding, sorting and degradation	0						13	0.03495	0.9505	1	13/809	372/15687
map04144	Endocytosis	Cellular Processes	Transport and catabolism	0						12	0.03399	0.9559	1	12/809	353/15687
map00510	N-Glycan biosynthesis	Metabolism	Glycan biosynthesis and metabolism	0						1	0.01471	0.9729	1	1/809	68/15687
map00195	Photosynthesis	Metabolism	Energy metabolism	0						3	0.02113	0.9796	1	3/809	142/15687
map03015	mRNA surveillance pathway	Genetic Information Processing	Translation	0						4	0.02326	0.9797	1	4/809	172/15687
map04141	Protein processing in endoplasmic reticulum	Genetic Information Processing	Folding, sorting and degradation	0						16	0.03326	0.9799	1	16/809	481/15687
map03250	Viral life cycle - HIV-1	Genetic Information Processing	Information processing in viruses	0						1	0.01316	0.9823	1	1/809	76/15687
map03030	DNA replication	Genetic Information Processing	Replication and repair	0						1	0.0122	0.9871	1	1/809	82/15687
map03020	RNA polymerase	Genetic Information Processing	Transcription	0						2	0.01639	0.9883	1	2/809	122/15687
map03060	Protein export	Genetic Information Processing	Folding, sorting and degradation	0						1	0.0119	0.9884	1	1/809	84/15687
map03040	Spliceosome	Genetic Information Processing	Transcription	0						12	0.0281	0.9941	1	12/809	427/15687
map00190	Oxidative phosphorylation	Metabolism	Energy metabolism	0						5	0.02041	0.9961	1	5/809	245/15687
map03440	Homologous recombination	Genetic Information Processing	Replication and repair	0						1	0.00862	0.9979	1	1/809	116/15687
map04814	Motor proteins	Cellular Processes	Cell motility	0						2	0.01212	0.9985	1	2/809	165/15687
map03420	Nucleotide excision repair	Genetic Information Processing	Replication and repair	0						1	0.00787	0.9988	1	1/809	127/15687
map03013	Nucleocytoplasmic transport	Genetic Information Processing	Translation	0						4	0.01569	0.9993	1	4/809	255/15687
map03082	ATP-dependent chromatin remodeling	Genetic Information Processing	Chromosome	0						1	0.00606	0.9998	1	1/809	165/15687
map03018	RNA degradation	Genetic Information Processing	Folding, sorting and degradation	0						1	0.00578	0.9999	1	1/809	173/15687
map00905	Brassinosteroid biosynthesis	Metabolism	Metabolism of terpenoids and polyketides	0						3	0.00716	1	1	3/809	419/15687

## Sheet: ACC10
Table S6C KEGG pathways co-regulated by transcriptome and metabolome integrated analysis
Pathway ID	Pathway Description	First Category	Second Category	Metabolite number	Rich factor_metab	P_value metabolite	P_adjust metabolite	Ratio_in_study Metabolite	Ratio_in_pop Metabolite	trans number	Rich factor_trans	P_value trans	P_adjust trans	Ratio_in_study trans	Ratio_in_pop trans
map00943	Isoflavonoid biosynthesis	Metabolism	Biosynthesis of other secondary metabolites	11	0.1563	1.268e-06	9e-05	10/112	64/4954	17	0.3148	1.754e-08	6.72e-07	17/989	54/15687
map00941	Flavonoid biosynthesis	Metabolism	Biosynthesis of other secondary metabolites	10	0.1351	4.975e-06	0.0001766	10/112	74/4954	15	0.1402	0.002868	0.02199	15/989	107/15687
map00590	Arachidonic acid metabolism	Metabolism	Lipid metabolism	8	0.1013	0.0003646	0.00863	8/112	79/4954	6	0.2857	0.001478	0.01416	6/989	21/15687
map00230	Purine metabolism	Metabolism	Nucleotide metabolism	7	0.0693	0.00749	0.1064	7/112	101/4954	11	0.0797	0.2535	0.6073	11/989	138/15687
map00052	Galactose metabolism	Metabolism	Carbohydrate metabolism	4	0.087	0.01948	0.1976	4/112	46/4954	7	0.0729	0.4023	0.7229	7/989	96/15687
map00250	Alanine, aspartate and glutamate metabolism	Metabolism	Amino acid metabolism	3	0.1071	0.02444	0.2169	3/112	28/4954	12	0.15	0.004182	0.02672	12/989	80/15687
map04075	Plant hormone signal transduction	Environmental Information Processing	Signal transduction	2	0.1667	0.02884	0.2275	2/112	12/4954	55	0.092	0.003062	0.02201	55/989	598/15687
map00600	Sphingolipid metabolism	Metabolism	Lipid metabolism	3	0.0857	0.0436	0.2381	3/112	35/4954	1	0.01724	0.9773	1	1/989	58/15687
map00564	Glycerophospholipid metabolism	Metabolism	Lipid metabolism	4	0.0714	0.03697	0.2386	4/112	56/4954	13	0.0833	0.1855	0.5079	13/989	156/15687
map02010	ABC transporters	Environmental Information Processing	Membrane transport	7	0.0507	0.03583	0.2544	7/112	138/4954	23	0.1438	0.0001752	0.002239	23/989	160/15687
map04136	Autophagy - other	Cellular Processes	Transport and catabolism	1	0.3333	0.0663	0.3363	1/112	3/4954	1	0.02128	0.9534	1	1/989	47/15687
map00960	Tropane, piperidine and pyridine alkaloid biosynthesis	Metabolism	Biosynthesis of other secondary metabolites	4	0.0556	0.079	0.3741	4/112	72/4954	15	0.2206	1.677e-05	0.0003215	15/989	68/15687
map00965	Betalain biosynthesis	Metabolism	Biosynthesis of other secondary metabolites	2	0.087	0.0942	0.4182	2/112	23/4954	1	0.125	0.4061	0.7185	1/989	8/15687
map00220	Arginine biosynthesis	Metabolism	Amino acid metabolism	2	0.087	0.0942	0.4182	2/112	23/4954	4	0.0702	0.4877	0.8372	4/989	57/15687
map00563	Glycosylphosphatidylinositol (GPI)-anchor biosynthesis	Metabolism	Glycan biosynthesis and metabolism	1	0.1429	0.148	0.4776	1/112	7/4954	1	0.01887	0.9685	1	1/989	53/15687
map00073	Cutin, suberine and wax biosynthesis	Metabolism	Lipid metabolism	2	0.0741	0.1235	0.487	2/112	27/4954	9	0.15	0.01232	0.059	9/989	60/15687
map00591	Linoleic acid metabolism	Metabolism	Lipid metabolism	2	0.0714	0.1311	0.4898	2/112	28/4954	20	0.4255	1.559e-12	1.793e-10	20/989	47/15687
map00770	Pantothenate and CoA biosynthesis	Metabolism	Metabolism of cofactors and vitamins	2	0.0667	0.1466	0.4957	2/112	30/4954	2	0.03279	0.9043	1	2/989	61/15687
map00790	Folate biosynthesis	Metabolism	Metabolism of cofactors and vitamins	3	0.0517	0.1427	0.5065	3/112	58/4954	3	0.0638	0.5759	0.9462	3/989	47/15687
map00630	Glyoxylate and dicarboxylate metabolism	Metabolism	Carbohydrate metabolism	3	0.04688	0.1754	0.519	3/112	64/4954	9	0.0726	0.381	0.6955	9/989	124/15687
map00920	Sulfur metabolism	Metabolism	Energy metabolism	2	0.0606	0.1706	0.5266	2/112	33/4954	4	0.0889	0.315	0.6834	4/989	45/15687
map00400	Phenylalanine, tyrosine and tryptophan biosynthesis	Metabolism	Amino acid metabolism	2	0.0571	0.1869	0.5308	2/112	35/4954	5	0.098	0.2172	0.5429	5/989	51/15687
map00500	Starch and sucrose metabolism	Metabolism	Carbohydrate metabolism	2	0.0541	0.2034	0.5555	2/112	37/4954	38	0.1357	6.38e-06	0.0001467	38/989	280/15687
map00480	Glutathione metabolism	Metabolism	Metabolism of other amino acids	2	0.0526	0.2118	0.5568	2/112	38/4954	22	0.125	0.001635	0.01447	22/989	176/15687
map00908	Zeatin biosynthesis	Metabolism	Metabolism of terpenoids and polyketides	2	0.0513	0.2201	0.5581	2/112	39/4954	4	0.0889	0.315	0.6834	4/989	45/15687
map00460	Cyanoamino acid metabolism	Metabolism	Metabolism of other amino acids	2	0.04444	0.2707	0.6199	2/112	45/4954	14	0.1373	0.004729	0.02719	14/989	102/15687
map00592	alpha-Linolenic acid metabolism	Metabolism	Lipid metabolism	2	0.04545	0.2622	0.6206	2/112	44/4954	14	0.1458	0.002698	0.02216	14/989	96/15687
map00260	Glycine, serine and threonine metabolism	Metabolism	Amino acid metabolism	2	0.04167	0.296	0.6567	2/112	48/4954	12	0.1	0.0756	0.2416	12/989	120/15687
map00944	Flavone and flavonol biosynthesis	Metabolism	Biosynthesis of other secondary metabolites	1	0.03922	0.3212	0.6911	2/112	51/4954	7	0.1892	0.00755	0.03945	7/989	37/15687
map00020	Citrate cycle (TCA cycle)	Metabolism	Carbohydrate metabolism	1	0.05	0.3676	0.7676	1/112	20/4954	4	0.0556	0.6732	1	4/989	72/15687
map00999	Biosynthesis of various plant secondary metabolites	Metabolism	Biosynthesis of other secondary metabolites	4	0.02685	0.4369	0.7953	4/112	149/4954	18	0.1463	0.00069	0.00721	18/989	123/15687
map00240	Pyrimidine metabolism	Metabolism	Nucleotide metabolism	2	0.03125	0.4269	0.7977	2/112	64/4954	7	0.0526	0.741	1	7/989	133/15687
map00906	Carotenoid biosynthesis	Metabolism	Metabolism of terpenoids and polyketides	3	0.02439	0.5304	0.8013	3/112	123/4954	6	0.125	0.0796	0.2475	6/989	48/15687
map00232	Caffeine metabolism	Metabolism	Biosynthesis of other secondary metabolites	1	0.04545	0.396	0.8033	1/112	22/4954	2	0.4	0.03494	0.1296	2/989	5/15687
map00290	Valine, leucine and isoleucine biosynthesis	Metabolism	Amino acid metabolism	1	0.04348	0.4097	0.808	1/112	23/4954	3	0.12	0.2067	0.5282	3/989	25/15687
map00966	Glucosinolate biosynthesis	Metabolism	Biosynthesis of other secondary metabolites	2	0.02597	0.5236	0.8082	2/112	77/4954	4	0.3636	0.003622	0.0245	4/989	11/15687
map00660	C5-Branched dibasic acid metabolism	Metabolism	Carbohydrate metabolism	1	0.02857	0.5521	0.8166	1/112	35/4954	2	0.1667	0.1726	0.4841	2/989	12/15687
map00470	D-Amino acid metabolism	Metabolism	Metabolism of other amino acids	2	0.02899	0.4654	0.8261	2/112	69/4954	1	0.04167	0.7907	1	1/989	24/15687
map00410	beta-Alanine metabolism	Metabolism	Metabolism of other amino acids	1	0.03125	0.5201	0.8392	1/112	32/4954	5	0.0781	0.3781	0.7014	5/989	64/15687
map00010	Glycolysis / Gluconeogenesis	Metabolism	Carbohydrate metabolism	1	0.03125	0.5201	0.8392	1/112	32/4954	18	0.1017	0.03057	0.1172	18/989	177/15687
map00280	Valine, leucine and isoleucine degradation	Metabolism	Amino acid metabolism	1	0.02381	0.6188	0.8449	1/112	42/4954	11	0.1447	0.00783	0.03915	11/989	76/15687
map00785	Lipoic acid metabolism	Metabolism	Metabolism of cofactors and vitamins	1	0.02273	0.636	0.852	1/112	44/4954	2	0.0556	0.6721	1	2/989	36/15687
map00360	Phenylalanine metabolism	Metabolism	Amino acid metabolism	1	0.02041	0.6757	0.8722	1/112	49/4954	9	0.1216	0.04242	0.1478	9/989	74/15687
map00520	Amino sugar and nucleotide sugar metabolism	Metabolism	Carbohydrate metabolism	2	0.01681	0.7568	0.8809	2/112	119/4954	23	0.0983	0.023	0.0945	23/989	234/15687
map00970	Aminoacyl-tRNA biosynthesis	Genetic Information Processing	Translation	1	0.01923	0.6974	0.8842	1/112	52/4954	3	0.02027	0.9962	1	3/989	148/15687
map00310	Lysine degradation	Metabolism	Amino acid metabolism	1	0.01786	0.7241	0.8864	1/112	56/4954	2	0.0339	0.8939	1	2/989	59/15687
map00051	Fructose and mannose metabolism	Metabolism	Carbohydrate metabolism	1	0.01786	0.7241	0.8864	1/112	56/4954	11	0.1146	0.03894	0.14	11/989	96/15687
map00902	Monoterpenoid biosynthesis	Metabolism	Metabolism of terpenoids and polyketides	1	0.01639	0.7543	0.8926	1/112	61/4954	3	0.1154	0.2235	0.5469	3/989	26/15687
map00130	Ubiquinone and other terpenoid-quinone biosynthesis	Metabolism	Metabolism of cofactors and vitamins	1	0.01408	0.8051	0.8932	1/112	71/4954	6	0.0789	0.3461	0.6634	6/989	76/15687
map01040	Biosynthesis of unsaturated fatty acids	Metabolism	Lipid metabolism	1	0.01351	0.8182	0.8937	1/112	74/4954	1	0.01852	0.9705	1	1/989	54/15687
map00760	Nicotinate and nicotinamide metabolism	Metabolism	Metabolism of cofactors and vitamins	1	0.01818	0.7177	0.8939	1/112	55/4954	4	0.0889	0.315	0.6834	4/989	45/15687
map00330	Arginine and proline metabolism	Metabolism	Amino acid metabolism	1	0.01449	0.7959	0.8969	1/112	69/4954	7	0.0778	0.3396	0.6618	7/989	90/15687
map00270	Cysteine and methionine metabolism	Metabolism	Amino acid metabolism	1	0.01493	0.7862	0.9003	1/112	67/4954	24	0.1412	0.0001696	0.002438	24/989	170/15687
map00380	Tryptophan metabolism	Metabolism	Amino acid metabolism	1	0.01205	0.8525	0.9034	1/112	83/4954	3	0.03333	0.9288	1	3/989	90/15687
map00909	Sesquiterpenoid and triterpenoid biosynthesis	Metabolism	Metabolism of terpenoids and polyketides	1	0.01124	0.8717	0.9102	1/112	89/4954	3	0.04	0.8598	1	3/989	75/15687
map00950	Isoquinoline alkaloid biosynthesis	Metabolism	Biosynthesis of other secondary metabolites	1	0.00775	0.9497	0.9632	1/112	129/4954	4	0.1481	0.0869	0.2563	4/989	27/15687
map00860	Porphyrin metabolism	Metabolism	Metabolism of cofactors and vitamins	1	0.00671	0.9686	0.9686	1/112	149/4954	10	0.137	0.01585	0.0701	10/989	73/15687
map00904	Diterpenoid biosynthesis	Metabolism	Metabolism of terpenoids and polyketides	1	0.00806	0.9434	0.9707	1/112	124/4954	2	0.04082	0.8237	1	2/989	49/15687
map01230	Biosynthesis of amino acids	Metabolism	Global and overview maps	9	0.0698	0.002377	0.04219	9/112	129/4954	0
map01232	Nucleotide metabolism	Metabolism	Global and overview maps	5	0.0862	0.00954	0.1129	5/112	58/4954	0
map01100	Metabolic pathways	Metabolism	Global and overview maps	81	0.02554	0.04069	0.2408	80/112	3132/4954	0
map01210	2-Oxocarboxylic acid metabolism	Metabolism	Global and overview maps	5	0.03472	0.2257	0.5526	5/112	144/4954	0
map00780	Biotin metabolism	Metabolism	Metabolism of cofactors and vitamins	1	0.03448	0.4858	0.8021	1/112	29/4954	0
map01110	Biosynthesis of secondary metabolites	Metabolism	Global and overview maps	51	0.02244	0.5666	0.8046	51/112	2273/4954	0
map01200	Carbon metabolism	Metabolism	Global and overview maps	3	0.02632	0.4792	0.81	3/112	114/4954	0
map00740	Riboflavin metabolism	Metabolism	Metabolism of cofactors and vitamins	1	0.04167	0.4231	0.8119	1/112	24/4954	0
map01240	Biosynthesis of cofactors	Metabolism	Global and overview maps	8	0.02432	0.4691	0.8124	8/112	329/4954	0
map00300	Lysine biosynthesis	Metabolism	Amino acid metabolism	1	0.02857	0.5521	0.8166	1/112	35/4954	0
map00261	Monobactam biosynthesis	Metabolism	Biosynthesis of other secondary metabolites	1	0.02564	0.5915	0.8235	1/112	39/4954	0
map00340	Histidine metabolism	Metabolism	Amino acid metabolism	1	0.02128	0.6604	0.8682	1/112	47/4954	0
map01250	Biosynthesis of nucleotide sugars	Metabolism	Global and overview maps	3	0.01493	0.8402	0.9039	3/112	201/4954	0
map00940	Phenylpropanoid biosynthesis	Metabolism	Biosynthesis of other secondary metabolites	0						43	0.1623	9.4e-09	5.41e-07	43/989	265/15687
map04016	MAPK signaling pathway - plant	Environmental Information Processing	Signal transduction	0						38	0.1462	1.044e-06	3.003e-05	38/989	260/15687
map00040	Pentose and glucuronate interconversions	Metabolism	Carbohydrate metabolism	0						32	0.124	0.0001898	0.002183	32/989	258/15687
map04712	Circadian rhythm - plant	Organismal Systems	Environmental adaptation	0						14	0.1918	0.0001602	0.002631	14/989	73/15687
map04626	Plant-pathogen interaction	Organismal Systems	Environmental adaptation	0						43	0.0949	0.00478	0.02618	43/989	453/15687
map00030	Pentose phosphate pathway	Metabolism	Carbohydrate metabolism	0						12	0.15	0.004182	0.02672	12/989	80/15687
map00053	Ascorbate and aldarate metabolism	Metabolism	Carbohydrate metabolism	0						13	0.125	0.01362	0.0626	13/989	104/15687
map00750	Vitamin B6 metabolism	Metabolism	Metabolism of cofactors and vitamins	0						5	0.1923	0.02141	0.0912	5/989	26/15687
map00350	Tyrosine metabolism	Metabolism	Amino acid metabolism	0						8	0.1429	0.02335	0.0926	8/989	56/15687
map00710	Carbon fixation in photosynthetic organisms	Metabolism	Energy metabolism	0						12	0.1071	0.04961	0.1678	12/989	112/15687
map00901	Indole alkaloid biosynthesis	Metabolism	Biosynthesis of other secondary metabolites	0						2	0.2857	0.0675	0.2217	2/989	7/15687
map00910	Nitrogen metabolism	Metabolism	Energy metabolism	0						6	0.125	0.0796	0.2475	6/989	48/15687
map04146	Peroxisome	Cellular Processes	Transport and catabolism	0						12	0.096	0.0956	0.2749	12/989	125/15687
map00561	Glycerolipid metabolism	Metabolism	Lipid metabolism	0						11	0.084	0.2037	0.5325	11/989	131/15687
map00650	Butanoate metabolism	Metabolism	Carbohydrate metabolism	0						4	0.1081	0.2025	0.5417	4/989	37/15687
map00071	Fatty acid degradation	Metabolism	Lipid metabolism	0						7	0.0833	0.2783	0.6154	7/989	84/15687
map00543	Exopolysaccharide biosynthesis	Metabolism	Glycan biosynthesis and metabolism	0						1	0.2	0.2779	0.6393	1/989	5/15687
map00524	Neomycin, kanamycin and gentamicin biosynthesis	Metabolism	Biosynthesis of other secondary metabolites	0						1	0.2	0.2779	0.6393	1/989	5/15687
map04070	Phosphatidylinositol signaling system	Environmental Information Processing	Signal transduction	0						9	0.0763	0.3268	0.648	9/989	118/15687
map00062	Fatty acid elongation	Metabolism	Lipid metabolism	0						5	0.0893	0.2771	0.6504	5/989	56/15687
map00620	Pyruvate metabolism	Metabolism	Carbohydrate metabolism	0						12	0.0741	0.3242	0.654	12/989	162/15687
map00565	Ether lipid metabolism	Metabolism	Lipid metabolism	0						4	0.0889	0.315	0.6834	4/989	45/15687
map00100	Steroid biosynthesis	Metabolism	Lipid metabolism	0						4	0.0816	0.3733	0.7039	4/989	49/15687
map00562	Inositol phosphate metabolism	Metabolism	Carbohydrate metabolism	0						8	0.0714	0.4106	0.7155	8/989	112/15687
map00945	Stilbenoid, diarylheptanoid and gingerol biosynthesis	Metabolism	Biosynthesis of other secondary metabolites	0						2	0.0769	0.4944	0.8361	2/989	26/15687
map03450	Non-homologous end-joining	Genetic Information Processing	Replication and repair	0						1	0.0769	0.5713	0.9521	1/989	13/15687
map03010	Ribosome	Genetic Information Processing	Translation	0						4	0.00791	1	1	4/989	506/15687
map04122	Sulfur relay system	Genetic Information Processing	Folding, sorting and degradation	0						1	0.0667	0.6237	1	1/989	15/15687
map00640	Propanoate metabolism	Metabolism	Carbohydrate metabolism	0						3	0.0588	0.6319	1	3/989	51/15687
map00450	Selenocompound metabolism	Metabolism	Metabolism of other amino acids	0						2	0.0588	0.6411	1	2/989	34/15687
map00196	Photosynthesis - antenna proteins	Metabolism	Energy metabolism	0						1	0.0556	0.6905	1	1/989	18/15687
map00061	Fatty acid biosynthesis	Metabolism	Lipid metabolism	0						4	0.0519	0.7236	1	4/989	77/15687
map00603	Glycosphingolipid biosynthesis - globo and isoglobo series	Metabolism	Glycan biosynthesis and metabolism	0						1	0.04762	0.7455	1	1/989	21/15687
map00730	Thiamine metabolism	Metabolism	Metabolism of cofactors and vitamins	0						1	0.03846	0.8163	1	1/989	26/15687
map00670	One carbon pool by folate	Metabolism	Metabolism of cofactors and vitamins	0						3	0.04286	0.8262	1	3/989	70/15687
map03250	Viral life cycle - HIV-1	Genetic Information Processing	Information processing in viruses	0						3	0.03947	0.8658	1	3/989	76/15687
map00900	Terpenoid backbone biosynthesis	Metabolism	Metabolism of terpenoids and polyketides	0						3	0.03797	0.8825	1	3/989	79/15687
map00430	Taurine and hypotaurine metabolism	Metabolism	Metabolism of other amino acids	0						1	0.02941	0.891	1	1/989	34/15687
map03022	Basal transcription factors	Genetic Information Processing	Transcription	0						1	0.01351	0.992	1	1/989	74/15687
map03030	DNA replication	Genetic Information Processing	Replication and repair	0						1	0.0122	0.9953	1	1/989	82/15687
map03018	RNA degradation	Genetic Information Processing	Folding, sorting and degradation	0						4	0.02312	0.9958	1	4/989	173/15687
map03410	Base excision repair	Genetic Information Processing	Replication and repair	0						1	0.01163	0.9964	1	1/989	86/15687
map04144	Endocytosis	Cellular Processes	Transport and catabolism	0						11	0.03116	0.9978	1	11/989	353/15687
map04814	Motor proteins	Cellular Processes	Cell motility	0						3	0.01818	0.9985	1	3/989	165/15687
map03015	mRNA surveillance pathway	Genetic Information Processing	Translation	0						3	0.01744	0.999	1	3/989	172/15687
map04145	Phagosome	Cellular Processes	Transport and catabolism	0						1	0.00917	0.9992	1	1/989	109/15687
map03008	Ribosome biogenesis in eukaryotes	Genetic Information Processing	Translation	0						2	0.0137	0.9992	1	2/989	146/15687
map03440	Homologous recombination	Genetic Information Processing	Replication and repair	0						1	0.00862	0.9995	1	1/989	116/15687
map03020	RNA polymerase	Genetic Information Processing	Transcription	0						1	0.0082	0.9997	1	1/989	122/15687
map03013	Nucleocytoplasmic transport	Genetic Information Processing	Translation	0						5	0.01961	0.9997	1	5/989	255/15687
map00195	Photosynthesis	Metabolism	Energy metabolism	0						1	0.00704	0.9999	1	1/989	142/15687
map03083	Polycomb repressive complex	Genetic Information Processing	Chromosome	0						1	0.00667	0.9999	1	1/989	150/15687
map04120	Ubiquitin mediated proteolysis	Genetic Information Processing	Folding, sorting and degradation	0						8	0.02151	1	1	8/989	372/15687
map03040	Spliceosome	Genetic Information Processing	Transcription	0						9	0.02108	1	1	9/989	427/15687
map04141	Protein processing in endoplasmic reticulum	Genetic Information Processing	Folding, sorting and degradation	0						11	0.02287	1	1	11/989	481/15687
map00190	Oxidative phosphorylation	Metabolism	Energy metabolism	0						2	0.00816	1	1	2/989	245/15687
map00905	Brassinosteroid biosynthesis	Metabolism	Metabolism of terpenoids and polyketides	0						4	0.00955	1	1	4/989	419/15687

## Sheet: ACC100
Table S6D KEGG pathways co-regulated by transcriptome and metabolome integrated analysis
Pathway ID	Pathway Description	First Category	Second Category	Metabolite number	Rich factor_metab	P_value metabolite	P_adjust metabolite	Ratio_in_study Metabolite	Ratio_in_pop Metabolite	trans number	Rich factor_trans	P_value trans	P_adjust trans	Ratio_in_study trans	Ratio_in_pop trans
map00943	Isoflavonoid biosynthesis	Metabolism	Biosynthesis of other secondary metabolites	9	0.1406	1.35e-05	0.001053	9/115	64/4954	13	0.2407	4.805e-05	0.000769	13/1063	54/15687
map00941	Flavonoid biosynthesis	Metabolism	Biosynthesis of other secondary metabolites	9	0.1216	4.462e-05	0.00174	9/115	74/4954	16	0.1495	0.002228	0.0208	16/1063	107/15687
map00290	Valine, leucine and isoleucine biosynthesis	Metabolism	Amino acid metabolism	4	0.1739	0.001735	0.03383	4/115	23/4954	2	0.08	0.5127	0.9413	2/1063	25/15687
map00250	Alanine, aspartate and glutamate metabolism	Metabolism	Amino acid metabolism	4	0.1429	0.003669	0.04769	4/115	28/4954	10	0.125	0.04327	0.1615	10/1063	80/15687
map00330	Arginine and proline metabolism	Metabolism	Amino acid metabolism	6	0.087	0.00501	0.04883	6/115	69/4954	9	0.1	0.1553	0.4348	9/1063	90/15687
map00770	Pantothenate and CoA biosynthesis	Metabolism	Metabolism of cofactors and vitamins	4	0.1333	0.004738	0.0528	4/115	30/4954	4	0.0656	0.6001	1	4/1063	61/15687
map00240	Pyrimidine metabolism	Metabolism	Nucleotide metabolism	6	0.0938	0.00344	0.0537	6/115	64/4954	7	0.0526	0.805	1	7/1063	133/15687
map00590	Arachidonic acid metabolism	Metabolism	Lipid metabolism	6	0.0759	0.00963	0.0751	6/115	79/4954	5	0.2381	0.01156	0.054	5/1063	21/15687
map00480	Glutathione metabolism	Metabolism	Metabolism of other amino acids	4	0.1053	0.01107	0.0785	4/115	38/4954	35	0.1989	6.6e-09	1.847e-07	35/1063	176/15687
map02010	ABC transporters	Environmental Information Processing	Membrane transport	8	0.058	0.01431	0.093	8/115	138/4954	30	0.1875	3.04e-07	6.81e-06	30/1063	160/15687
map00470	D-Amino acid metabolism	Metabolism	Metabolism of other amino acids	5	0.0725	0.02135	0.1189	5/115	69/4954	1	0.04167	0.8146	1	1/1063	24/15687
map00260	Glycine, serine and threonine metabolism	Metabolism	Amino acid metabolism	4	0.0833	0.02447	0.1272	4/115	48/4954	16	0.1333	0.00702	0.03932	16/1063	120/15687
map00970	Aminoacyl-tRNA biosynthesis	Genetic Information Processing	Translation	4	0.0769	0.03174	0.1456	4/115	52/4954	2	0.01351	0.9997	1	2/1063	148/15687
map04075	Plant hormone signal transduction	Environmental Information Processing	Signal transduction	2	0.1667	0.03029	0.1477	2/115	12/4954	50	0.0836	0.0714	0.2284	50/1063	598/15687
map00410	beta-Alanine metabolism	Metabolism	Metabolism of other amino acids	3	0.0938	0.03709	0.1607	3/115	32/4954	9	0.1406	0.02782	0.1154	9/1063	64/15687
map04136	Autophagy - other	Cellular Processes	Transport and catabolism	1	0.3333	0.0681	0.2794	1/115	3/4954	1	0.02128	0.9632	1	1/1063	47/15687
map00592	alpha-Linolenic acid metabolism	Metabolism	Lipid metabolism	3	0.0682	0.0813	0.3169	3/115	44/4954	15	0.1563	0.001944	0.01979	15/1063	96/15687
map00460	Cyanoamino acid metabolism	Metabolism	Metabolism of other amino acids	3	0.0667	0.0857	0.3182	3/115	45/4954	15	0.1471	0.00355	0.02651	15/1063	102/15687
map00220	Arginine biosynthesis	Metabolism	Amino acid metabolism	2	0.087	0.0986	0.3494	2/115	23/4954	4	0.0702	0.5456	0.9549	4/1063	57/15687
map00073	Cutin, suberine and wax biosynthesis	Metabolism	Lipid metabolism	2	0.0741	0.1289	0.4372	2/115	27/4954	10	0.1667	0.00663	0.04644	10/1063	60/15687
map00591	Linoleic acid metabolism	Metabolism	Lipid metabolism	2	0.0714	0.1368	0.4447	2/115	28/4954	17	0.3617	4.639e-09	1.732e-07	17/1063	47/15687
map00563	Glycosylphosphatidylinositol (GPI)-anchor biosynthesis	Metabolism	Glycan biosynthesis and metabolism	1	0.1429	0.1517	0.4551	1/115	7/4954	2	0.03774	0.8827	1	2/1063	53/15687
map00920	Sulfur metabolism	Metabolism	Energy metabolism	2	0.0606	0.1777	0.5135	2/115	33/4954	9	0.2	0.00281	0.02248	9/1063	45/15687
map00960	Tropane, piperidine and pyridine alkaloid biosynthesis	Metabolism	Biosynthesis of other secondary metabolites	3	0.04167	0.2335	0.5204	3/115	72/4954	13	0.1912	0.000562	0.007	13/1063	68/15687
map00261	Monobactam biosynthesis	Metabolism	Biosynthesis of other secondary metabolites	2	0.0513	0.2289	0.541	2/115	39/4954	4	0.1739	0.0663	0.2249	4/1063	23/15687
map00908	Zeatin biosynthesis	Metabolism	Metabolism of terpenoids and polyketides	2	0.0513	0.2289	0.541	2/115	39/4954	7	0.1556	0.03049	0.1177	7/1063	45/15687
map00600	Sphingolipid metabolism	Metabolism	Lipid metabolism	2	0.0571	0.1946	0.5421	2/115	35/4954	1	0.01724	0.983	1	1/1063	58/15687
map00500	Starch and sucrose metabolism	Metabolism	Carbohydrate metabolism	2	0.0541	0.2117	0.5503	2/115	37/4954	37	0.1321	7.2e-05	0.001008	37/1063	280/15687
map00230	Purine metabolism	Metabolism	Nucleotide metabolism	4	0.0396	0.2067	0.556	4/115	101/4954	10	0.0725	0.4605	0.8893	10/1063	138/15687
map00195	Photosynthesis	Metabolism	Energy metabolism	1	0.0909	0.2279	0.5734	1/115	11/4954	1	0.00704	1	1	1/1063	142/15687
map00052	Galactose metabolism	Metabolism	Carbohydrate metabolism	2	0.04348	0.2895	0.6104	2/115	46/4954	12	0.125	0.02858	0.1143	12/1063	96/15687
map00190	Oxidative phosphorylation	Metabolism	Energy metabolism	1	0.0625	0.3137	0.6438	1/115	16/4954	2	0.00816	1	1	2/1063	245/15687
map00944	Flavone and flavonol biosynthesis	Metabolism	Biosynthesis of other secondary metabolites	1	0.03922	0.3326	0.6652	2/115	51/4954	4	0.1081	0.24	0.5485	4/1063	37/15687
map00061	Fatty acid biosynthesis	Metabolism	Lipid metabolism	2	0.03448	0.3916	0.6942	2/115	58/4954	4	0.0519	0.7748	1	4/1063	77/15687
map00053	Ascorbate and aldarate metabolism	Metabolism	Carbohydrate metabolism	2	0.03509	0.3833	0.6953	2/115	57/4954	11	0.1058	0.0937	0.2761	11/1063	104/15687
map00310	Lysine degradation	Metabolism	Amino acid metabolism	2	0.03571	0.375	0.7134	2/115	56/4954	1	0.01695	0.9842	1	1/1063	59/15687
map00564	Glycerophospholipid metabolism	Metabolism	Lipid metabolism	2	0.03571	0.375	0.7134	2/115	56/4954	11	0.0705	0.4908	0.9162	11/1063	156/15687
map00430	Taurine and hypotaurine metabolism	Metabolism	Metabolism of other amino acids	1	0.04167	0.4317	0.7164	1/115	24/4954	1	0.02941	0.9082	1	1/1063	34/15687
map00270	Cysteine and methionine metabolism	Metabolism	Amino acid metabolism	2	0.02985	0.4639	0.7384	2/115	67/4954	39	0.2294	9.82e-12	1.1e-09	39/1063	170/15687
map00030	Pentose phosphate pathway	Metabolism	Carbohydrate metabolism	1	0.02703	0.582	0.7694	1/115	37/4954	10	0.125	0.04327	0.1615	10/1063	80/15687
map00750	Vitamin B6 metabolism	Metabolism	Metabolism of cofactors and vitamins	1	0.03448	0.4949	0.7721	1/115	29/4954	6	0.2308	0.00679	0.04476	6/1063	26/15687
map00730	Thiamine metabolism	Metabolism	Metabolism of cofactors and vitamins	1	0.03226	0.5183	0.7774	1/115	31/4954	2	0.0769	0.534	0.9646	2/1063	26/15687
map00380	Tryptophan metabolism	Metabolism	Amino acid metabolism	2	0.0241	0.579	0.7787	2/115	83/4954	4	0.04444	0.8672	1	4/1063	90/15687
map00906	Carotenoid biosynthesis	Metabolism	Metabolism of terpenoids and polyketides	3	0.02439	0.5485	0.7922	3/115	123/4954	2	0.04167	0.8457	1	2/1063	48/15687
map00660	C5-Branched dibasic acid metabolism	Metabolism	Carbohydrate metabolism	1	0.02857	0.5617	0.7966	1/115	35/4954	2	0.1667	0.1933	0.4921	2/1063	12/15687
map00300	Lysine biosynthesis	Metabolism	Amino acid metabolism	1	0.02857	0.5617	0.7966	1/115	35/4954	3	0.1034	0.3134	0.6382	3/1063	29/15687
map00400	Phenylalanine, tyrosine and tryptophan biosynthesis	Metabolism	Amino acid metabolism	1	0.02857	0.5617	0.7966	1/115	35/4954	5	0.098	0.2623	0.5544	5/1063	51/15687
map00350	Tyrosine metabolism	Metabolism	Amino acid metabolism	2	0.02564	0.545	0.8021	2/115	78/4954	9	0.1607	0.01236	0.0554	9/1063	56/15687
map00280	Valine, leucine and isoleucine degradation	Metabolism	Amino acid metabolism	1	0.02381	0.6287	0.8039	1/115	42/4954	7	0.0921	0.2551	0.5494	7/1063	76/15687
map00640	Propanoate metabolism	Metabolism	Carbohydrate metabolism	1	0.02439	0.6198	0.8057	1/115	41/4954	3	0.0588	0.681	1	3/1063	51/15687
map00902	Monoterpenoid biosynthesis	Metabolism	Metabolism of terpenoids and polyketides	1	0.01639	0.7634	0.8757	1/115	61/4954	6	0.2308	0.00679	0.04476	6/1063	26/15687
map00630	Glyoxylate and dicarboxylate metabolism	Metabolism	Carbohydrate metabolism	1	0.01563	0.7797	0.8814	1/115	64/4954	11	0.0887	0.219	0.5333	11/1063	124/15687
map00040	Pentose and glucuronate interconversions	Metabolism	Carbohydrate metabolism	1	0.01724	0.746	0.8951	1/115	58/4954	24	0.093	0.0712	0.2346	24/1063	258/15687
map00790	Folate biosynthesis	Metabolism	Metabolism of cofactors and vitamins	1	0.01724	0.746	0.8951	1/115	58/4954	3	0.0638	0.626	1	3/1063	47/15687
map00760	Nicotinate and nicotinamide metabolism	Metabolism	Metabolism of cofactors and vitamins	1	0.01818	0.7272	0.9003	1/115	55/4954	2	0.04444	0.8188	1	2/1063	45/15687
map01040	Biosynthesis of unsaturated fatty acids	Metabolism	Lipid metabolism	1	0.01351	0.8264	0.9209	1/115	74/4954	1	0.01852	0.9775	1	1/1063	54/15687
map00966	Glucosinolate biosynthesis	Metabolism	Biosynthesis of other secondary metabolites	1	0.01299	0.8384	0.9211	1/115	77/4954	2	0.1818	0.1683	0.4597	2/1063	11/15687
map00909	Sesquiterpenoid and triterpenoid biosynthesis	Metabolism	Metabolism of terpenoids and polyketides	1	0.01124	0.8787	0.9389	1/115	89/4954	7	0.0933	0.2446	0.5373	7/1063	75/15687
map00860	Porphyrin metabolism	Metabolism	Metabolism of cofactors and vitamins	2	0.01342	0.8668	0.9391	2/115	149/4954	4	0.0548	0.7378	1	4/1063	73/15687
map00904	Diterpenoid biosynthesis	Metabolism	Metabolism of terpenoids and polyketides	1	0.00806	0.9476	0.9726	1/115	124/4954	5	0.102	0.2364	0.5516	5/1063	49/15687
map00999	Biosynthesis of various plant secondary metabolites	Metabolism	Biosynthesis of other secondary metabolites	1	0.00671	0.9714	0.984	1/115	149/4954	25	0.2033	6.09e-07	1.137e-05	25/1063	123/15687
map00520	Amino sugar and nucleotide sugar metabolism	Metabolism	Carbohydrate metabolism	1	0.0084	0.9409	0.9918	1/115	119/4954	17	0.0726	0.4191	0.8235	17/1063	234/15687
map01230	Biosynthesis of amino acids	Metabolism	Global and overview maps	11	0.0853	0.0001733	0.004506	11/115	129/4954	0
map01100	Metabolic pathways	Metabolism	Global and overview maps	85	0.02714	0.00929	0.0806	85/115	3132/4954	0
map00965	Betalain biosynthesis	Metabolism	Biosynthesis of other secondary metabolites	3	0.1304	0.01539	0.0923	3/115	23/4954	0
map00780	Biotin metabolism	Metabolism	Metabolism of cofactors and vitamins	2	0.069	0.1448	0.4519	2/115	29/4954	0
map04122	Sulfur relay system	Genetic Information Processing	Folding, sorting and degradation	1	0.0909	0.2279	0.5734	1/115	11/4954	0
map00785	Lipoic acid metabolism	Metabolism	Metabolism of cofactors and vitamins	2	0.04545	0.2722	0.5897	2/115	44/4954	0
map01240	Biosynthesis of cofactors	Metabolism	Global and overview maps	9	0.02736	0.3544	0.6911	9/115	329/4954	0
map00232	Caffeine metabolism	Metabolism	Biosynthesis of other secondary metabolites	1	0.04545	0.4042	0.7006	1/115	22/4954	0
map00740	Riboflavin metabolism	Metabolism	Metabolism of cofactors and vitamins	1	0.04167	0.4317	0.7164	1/115	24/4954	0
map01210	2-Oxocarboxylic acid metabolism	Metabolism	Global and overview maps	4	0.02778	0.431	0.7308	4/115	144/4954	0
map01200	Carbon metabolism	Metabolism	Global and overview maps	3	0.02632	0.4969	0.7599	3/115	114/4954	0
map00340	Histidine metabolism	Metabolism	Amino acid metabolism	1	0.02128	0.6702	0.8431	1/115	47/4954	0
map01110	Biosynthesis of secondary metabolites	Metabolism	Global and overview maps	49	0.022	0.7312	0.8911	50/115	2273/4954	0
map01232	Nucleotide metabolism	Metabolism	Global and overview maps	1	0.01724	0.746	0.8951	1/115	58/4954	0
map01212	Fatty acid metabolism	Metabolism	Global and overview maps	1	0.0082	0.9451	0.9829	1/115	122/4954	0
map01250	Biosynthesis of nucleotide sugars	Metabolism	Global and overview maps	1	0.004975	0.9919	0.9919	1/115	201/4954	0
map00940	Phenylpropanoid biosynthesis	Metabolism	Biosynthesis of other secondary metabolites	0						46	0.1736	3.028e-09	1.696e-07	46/1063	265/15687
map00450	Selenocompound metabolism	Metabolism	Metabolism of other amino acids	0						8	0.2353	0.001611	0.01804	8/1063	34/15687
map00543	Exopolysaccharide biosynthesis	Metabolism	Glycan biosynthesis and metabolism	0						3	0.6	0.002797	0.0241	3/1063	5/15687
map00950	Isoquinoline alkaloid biosynthesis	Metabolism	Biosynthesis of other secondary metabolites	0						6	0.2222	0.00824	0.04397	6/1063	27/15687
map00945	Stilbenoid, diarylheptanoid and gingerol biosynthesis	Metabolism	Biosynthesis of other secondary metabolites	0						6	0.2308	0.00679	0.04476	6/1063	26/15687
map00901	Indole alkaloid biosynthesis	Metabolism	Biosynthesis of other secondary metabolites	0						3	0.4286	0.00883	0.04496	3/1063	7/15687
map04016	MAPK signaling pathway - plant	Environmental Information Processing	Signal transduction	0						28	0.1077	0.01019	0.0496	28/1063	260/15687
map00360	Phenylalanine metabolism	Metabolism	Amino acid metabolism	0						10	0.1351	0.02706	0.1166	10/1063	74/15687
map04712	Circadian rhythm - plant	Organismal Systems	Environmental adaptation	0						9	0.1233	0.0575	0.2013	9/1063	73/15687
map04626	Plant-pathogen interaction	Organismal Systems	Environmental adaptation	0						39	0.0861	0.073	0.2271	39/1063	453/15687
map00010	Glycolysis / Gluconeogenesis	Metabolism	Carbohydrate metabolism	0						17	0.096	0.0921	0.2789	17/1063	177/15687
map00130	Ubiquinone and other terpenoid-quinone biosynthesis	Metabolism	Metabolism of cofactors and vitamins	0						8	0.1053	0.1417	0.4069	8/1063	76/15687
map00062	Fatty acid elongation	Metabolism	Lipid metabolism	0						6	0.1071	0.1769	0.4718	6/1063	56/15687
map00670	One carbon pool by folate	Metabolism	Metabolism of cofactors and vitamins	0						7	0.1	0.1947	0.4846	7/1063	70/15687
map00565	Ether lipid metabolism	Metabolism	Lipid metabolism	0						5	0.1111	0.187	0.487	5/1063	45/15687
map00710	Carbon fixation in photosynthetic organisms	Metabolism	Energy metabolism	0						10	0.0893	0.2274	0.5419	10/1063	112/15687
map00650	Butanoate metabolism	Metabolism	Carbohydrate metabolism	0						4	0.1081	0.24	0.5485	4/1063	37/15687
map00561	Glycerolipid metabolism	Metabolism	Lipid metabolism	0						11	0.084	0.2742	0.5687	11/1063	131/15687
map00071	Fatty acid degradation	Metabolism	Lipid metabolism	0						7	0.0833	0.3424	0.6848	7/1063	84/15687
map00051	Fructose and mannose metabolism	Metabolism	Carbohydrate metabolism	0						7	0.0729	0.4773	0.9061	7/1063	96/15687
map00620	Pyruvate metabolism	Metabolism	Carbohydrate metabolism	0						11	0.0679	0.5421	0.9638	11/1063	162/15687
map03010	Ribosome	Genetic Information Processing	Translation	0						3	0.00593	1	1	3/1063	506/15687
map04146	Peroxisome	Cellular Processes	Transport and catabolism	0						8	0.064	0.6181	1	8/1063	125/15687
map00562	Inositol phosphate metabolism	Metabolism	Carbohydrate metabolism	0						7	0.0625	0.6422	1	7/1063	112/15687
map00100	Steroid biosynthesis	Metabolism	Lipid metabolism	0						3	0.0612	0.6543	1	3/1063	49/15687
map04814	Motor proteins	Cellular Processes	Cell motility	0						10	0.0606	0.6881	1	10/1063	165/15687
map00020	Citrate cycle (TCA cycle)	Metabolism	Carbohydrate metabolism	0						4	0.0556	0.7279	1	4/1063	72/15687
map00603	Glycosphingolipid biosynthesis - globo and isoglobo series	Metabolism	Glycan biosynthesis and metabolism	0						1	0.04762	0.7711	1	1/1063	21/15687
map00900	Terpenoid backbone biosynthesis	Metabolism	Metabolism of terpenoids and polyketides	0						4	0.0506	0.7918	1	4/1063	79/15687
map04070	Phosphatidylinositol signaling system	Environmental Information Processing	Signal transduction	0						6	0.0508	0.819	1	6/1063	118/15687
map00910	Nitrogen metabolism	Metabolism	Energy metabolism	0						2	0.04167	0.8457	1	2/1063	48/15687
map00531	Glycosaminoglycan degradation	Metabolism	Glycan biosynthesis and metabolism	0						1	0.03571	0.86	1	1/1063	28/15687
map04145	Phagosome	Cellular Processes	Transport and catabolism	0						4	0.0367	0.9431	1	4/1063	109/15687
map03250	Viral life cycle - HIV-1	Genetic Information Processing	Information processing in viruses	0						2	0.02632	0.9688	1	2/1063	76/15687
map04130	SNARE interactions in vesicular transport	Genetic Information Processing	Folding, sorting and degradation	0						1	0.01887	0.9759	1	1/1063	53/15687
map03410	Base excision repair	Genetic Information Processing	Replication and repair	0						2	0.02326	0.9828	1	2/1063	86/15687
map03022	Basal transcription factors	Genetic Information Processing	Transcription	0						1	0.01351	0.9945	1	1/1063	74/15687
map03013	Nucleocytoplasmic transport	Genetic Information Processing	Translation	0						8	0.03137	0.9966	1	8/1063	255/15687
map03015	mRNA surveillance pathway	Genetic Information Processing	Translation	0						4	0.02326	0.9977	1	4/1063	172/15687
map04144	Endocytosis	Cellular Processes	Transport and catabolism	0						12	0.03399	0.9981	1	12/1063	353/15687
map03020	RNA polymerase	Genetic Information Processing	Transcription	0						2	0.01639	0.9982	1	2/1063	122/15687
map03018	RNA degradation	Genetic Information Processing	Folding, sorting and degradation	0						3	0.01734	0.9995	1	3/1063	173/15687
map04141	Protein processing in endoplasmic reticulum	Genetic Information Processing	Folding, sorting and degradation	0						16	0.03326	0.9997	1	16/1063	481/15687
map03420	Nucleotide excision repair	Genetic Information Processing	Replication and repair	0						1	0.00787	0.9999	1	1/1063	127/15687
map03082	ATP-dependent chromatin remodeling	Genetic Information Processing	Chromosome	0						2	0.01212	0.9999	1	2/1063	165/15687
map03008	Ribosome biogenesis in eukaryotes	Genetic Information Processing	Translation	0						1	0.00685	1	1	1/1063	146/15687
map03083	Polycomb repressive complex	Genetic Information Processing	Chromosome	0						1	0.00667	1	1	1/1063	150/15687
map04120	Ubiquitin mediated proteolysis	Genetic Information Processing	Folding, sorting and degradation	0						7	0.01882	1	1	7/1063	372/15687
map03040	Spliceosome	Genetic Information Processing	Transcription	0						9	0.02108	1	1	9/1063	427/15687
map00905	Brassinosteroid biosynthesis	Metabolism	Metabolism of terpenoids and polyketides	0						5	0.01193	1	1	5/1063	419/15687
