# Supplementary material
Source: Research Square preprint supplement (doi:10.21203/rs.3.rs-9350064/v1)
Supplement: Supplementary file 5 [file 504141064d789f9b817d4fc7.xlsx]

## Sheet: Table S4A
Table S4A Statistics of differentially accumulated metabolites (DAMs) in different comparison groups.
NO.	Metab ID	HMDB Superclass	HMDB Class	HMDB Subclass	Metabolite	up/dowun	ACC1	ACC10	ACC100
1	metab_1503	Organic acids and derivatives	Carboxylic acids and derivatives	Amino acids, peptides, and analogues	((2R,3S,4S,5R,6S)-6-(2-(3-(Benzofuran-5-Yl)Propanoyl)-3-Hydroxy-5-Methylphenoxy)-3,4,5-Trihydroxytetrahydro-2H-Pyran-2-Yl)Methyl Methyl Carbonate			down
2	metab_1792	Organic oxygen compounds	Organooxygen compounds	Carbohydrates and carbohydrate conjugates	(-)-Erythro-Anethole Glycol 2-Glucoside				down
3	metab_9433	Phenylpropanoids and polyketides	Isoflavonoids	Not Available	(-)-Medicarpin	up	up	up	up
4	metab_5675	Organic acids and derivatives	Carboxylic acids and derivatives	Amino acids, peptides, and analogues	(+)-Threo-2-Amino-3,4-Dihydroxybutanoic Acid			up
5	metab_10050	Not Available	Not Available	Not Available	(+/-)13-Hpode				down
6	metab_11518	Not Available	Not Available	Not Available	(+/-)9-Hpode				down
7	metab_4677	Lipids and lipid-like molecules	Prenol lipids	Sesquiterpenoids	(1(10)E,4A,5E)-1(10),5-Germacradiene-12-Acetoxy-4,11-Diol		up
8	metab_10054	Not Available	Not Available	Not Available	(11E,15Z)-9,10,13-Trihydroxy-11,15-Octadecadienoic Acid				down
9	metab_12682	Lipids and lipid-like molecules	Steroids and steroid derivatives	Steroid lactones	(14Alpha,17Beta,20S,22R)-14,20-Epoxy-17-Hydroxy-1-Oxowitha-3,5,24-Trienolide	up
10	metab_13886	Alkaloids and derivatives	Harmala alkaloids	Not Available	(1R*,3R*,3'S*)-1,2,3,4-Tetrahydro-1-(2-Thio-3-Pyrrolidinyl)-Beta-Carboline-3-Carboxylic Acid			down	down
11	metab_7386	Organic acids and derivatives	Carboxylic acids and derivatives	Amino acids, peptides, and analogues	(1R,4R,5S,6R)-4-Amino-2-Oxabicyclo[3.1.0]Hexane-4,6-Dicarboxylic Acid		up	up	up
12	metab_12964	Organic acids and derivatives	Keto acids and derivatives	Gamma-keto acids and derivatives	(1R,6R)-6-Hydroxy-2-Succinylcyclohexa-2,4-Diene-1-Carboxylate		down
13	metab_8113	Organic acids and derivatives	Carboxylic acids and derivatives	Amino acids, peptides, and analogues	(1S,2S,3S,4R)-3-(1-Acetamido-2-Ethylbutyl)-4-(Diaminomethylideneamino)-2-Hydroxycyclopentane-1-Carboxylic Acid	up
14	metab_11707	Not Available	Not Available	Not Available	(2E)-2-[Hydroxy(Phenyl)Methylidene]-6-Methoxy-1-Benzofuran-3-One		up	up	up
15	metab_9746	Not Available	Not Available	Not Available	(2E)-5-(3-Hydroxy-2,3-Dimethylbicyclo[2.2.1]Hept-2-Yl)-2-Methyl-2-Pentenoic Acid		down	down	down
16	metab_834	Phenylpropanoids and polyketides	Flavonoids	Flavonoid glycosides	(2R,3R)-3,3',4',7-Tetrahydroxyflavanone 7-O-Alpha-L-Rhamnopyranoside			up	up
17	metab_11305	Phenylpropanoids and polyketides	Flavonoids	Flavans	(2R,3R)-Pinobanksin		up	up	up
18	metab_7052	Organic acids and derivatives	Carboxylic acids and derivatives	Amino acids, peptides, and analogues	(2R,4S)-Pyrrolidine-2,4-Dicarboxylic Acid				up
19	metab_13312	Alkaloids and derivatives	Cinchona alkaloids	Not Available	(2R,4S,5R)-5-Ethyl-2-[(S)-Hydroxy-(6-Methoxyquinolin-4-Yl)Methyl]-1-Azabicyclo[2.2.2]Octan-5-Ol	up
20	metab_8336	Organic oxygen compounds	Organooxygen compounds	Carbohydrates and carbohydrate conjugates	(2S)-2-Butanol O-[B-D-Apiofuranosyl-(1->6)-B-D-Glucopyranoside]		up		up
21	metab_13525	Organic acids and derivatives	Carboxylic acids and derivatives	Amino acids, peptides, and analogues	(2S,3As,6As)-1-[(2R)-2-Carboxy-2-[[(2S)-1-Ethoxy-1-Oxo-4-Phenylbutan-2-Yl]Amino]Acetyl]-3,3A,4,5,6,6A-Hexahydro-2H-Cyclopenta[B]Pyrrole-2-Carboxylic Acid	up
22	metab_14066	Organic acids and derivatives	Carboxylic acids and derivatives	Amino acids, peptides, and analogues	(2S,3R,4S,5R)-3,4,5-Trihydroxy-6-Oxopiperidine-2-Carboxylic Acid				up
23	metab_2107	Benzenoids	Benzene and substituted derivatives	Phenylpropanes	(2S,3S)-2-(2,4-Difluorophenyl)-3-Methylsulfonyl-1-(1,2,4-Triazol-1-Yl)Butan-2-Ol		up	up	up
24	metab_5441	Organic acids and derivatives	Carboxylic acids and derivatives	Amino acids, peptides, and analogues	(2S,3'S)-Alpha-Amino-2-Carboxy-5-Oxo-1-Pyrrolidinebutanoic Acid			up	up
25	metab_4673	Lipids and lipid-like molecules	Fatty Acyls	Fatty acid esters	(2Z)-Non-2-Enoylcarnitine	up	up
26	metab_9343	Organic oxygen compounds	Organooxygen compounds	Alcohols and polyols	(3S)-3-Hydroxycyclocitral		down	down	down
27	metab_1618	Lipids and lipid-like molecules	Prenol lipids	Diterpenoids	(3S,5R,6R)-3,5-Dihydroxy-6,7-Didehydro-5,6-Dihydro-12'-Apo-Beta-Caroten-12'-Al	up	up	up	up
28	metab_4845	Lipids and lipid-like molecules	Prenol lipids	Sesquiterpenoids	(3S,5R,6R,7E)-3,5,6-Trihydroxy-7-Megastigmen-9-One	up
29	metab_12034	Phenylpropanoids and polyketides	Coumarins and derivatives	Furanocoumarins	(3S,7R)-16-Hydroxy-11-Methoxy-6,8,19-Trioxapentacyclo[10.7.0.02,9.03,7.013,17]Nonadeca-1,4,9,11,13(17)-Pentaen-18-One		up	up	up
30	metab_2031	Not Available	Not Available	Not Available	(4-Cyclohexylpiperazin-1-Yl)-(4-Piperidin-1-Ylquinazolin-6-Yl)Methanone				down
31	metab_1563	Lipids and lipid-like molecules	Fatty Acyls	Fatty acid esters	(4E)-3-Hydroxyhex-4-Enoylcarnitine			up
32	metab_1560	Lipids and lipid-like molecules	Fatty Acyls	Fatty acid esters	(6E,10E)-3-Hydroxydodeca-6,10-Dienoylcarnitine	up	up
33	metab_3598	Lipids and lipid-like molecules	Steroids and steroid derivatives	Estrane steroids	(8R,9R,10S,13S,14S)-13-Methyl-1,4,5,6,7,8,9,10,11,12,14,15,16,17-Tetradecahydrocyclopenta[A]Phenanthrene		down
34	metab_11213	Lipids and lipid-like molecules	Steroids and steroid derivatives	Hydroxysteroids	(8S,9S,10S,11S,13S,14S,17R)-11,17-Dihydroxy-17-(2-Hydroxyacetyl)-10,13-Dimethyl-1,4,5,6,7,8,9,11,12,14,15,16-Dodecahydrocyclopenta[A]Phenanthrene-2,3-Dione		down	down	down
35	metab_13027	Lipids and lipid-like molecules	Fatty Acyls	Fatty acyl glycosides	(E)-2-Methyl-2-Buten-1-Ol O-Beta-D-Glucopyranoside				up
36	metab_7801	Organic acids and derivatives	Carboxylic acids and derivatives	Amino acids, peptides, and analogues	(R)-2-Amino-3-(2-Propynylthio)Propanoic Acid				up
37	metab_8123	Organoheterocyclic compounds	Isoquinolines and derivatives	Benzylisoquinolines	(R)-Laudanidine	up
38	metab_13814	Organoheterocyclic compounds	Thienopyrimidines	Not Available	(S)-5-(4-Hydroxy-4-Methylisoxazolidine-2-Carbonyl)-1-Isopropyl-3-Methyl-6-((3-Methyl-5-(Trifluoromethyl)-1H-Pyrazol-4-Yl)Methyl)Thieno[2,3-D]Pyrimidine-2,4(1H,3H)-Dione		up	up	up
39	metab_632	Organic acids and derivatives	Keto acids and derivatives	Medium-chain keto acids and derivatives	(S)-5-Amino-3-Oxohexanoate	up			up
40	metab_1018	Nucleosides, nucleotides, and analogues	5''-deoxyribonucleosides	Not Available	(S)-5'-Deoxy-5'-(Methylsulfinyl)Adenosine			up	up
41	metab_1332	Phenylpropanoids and polyketides	Macrolides and analogues	Zearalenones	(S,E)-Zearalenone	up		up
42	metab_10034	Organic oxygen compounds	Organooxygen compounds	Carbonyl compounds	(Z)-3-Methyl-2-(2-Pentenyl)-2-Cyclopenten-1-One		down	down	down
43	metab_1898	Organic oxygen compounds	Organooxygen compounds	Carbonyl compounds	(Z)-3-Oxo-2-(2-Pentenyl)-1-Cyclopenteneacetic Acid	up	up	up	up
44	metab_13196	Organoheterocyclic compounds	Isoindoles and derivatives	Isoindolines	(Z)-Narceine Imide	down
45	metab_4568	Lipids and lipid-like molecules	Steroids and steroid derivatives	Steroid esters	[(8R,9S,13S,14S,17S)-17-Hydroxy-13-Methyl-6,7,8,9,11,12,14,15,16,17-Decahydrocyclopenta[A]Phenanthren-3-Yl] 3-Cyclopentylpropanoate		up	up	up
46	metab_4722	Not Available	Not Available	Not Available	1-(2,4-Dihydroxyquinolin-3-Yl)Ethan-1-One				up
47	metab_931	Organic acids and derivatives	Carboxylic acids and derivatives	Amino acids, peptides, and analogues	1-(Malonylamino)Cyclopropanecarboxylic Acid		up	up	up
48	metab_11255	Organic oxygen compounds	Organooxygen compounds	Carbonyl compounds	1,1,1-Trifluoroheptadecan-2-One	down		down
49	metab_12046	Organoheterocyclic compounds	Diazanaphthalenes	Benzodiazines	1,2,3,9-Tetrahydropyrrolo[2,1-B]Quinazolin-3-Ol			down	down
50	metab_4400	Lipids and lipid-like molecules	Prenol lipids	Monoterpenoids	1,5-Dimethyl-1-Vinyl-4-Hexenyl Acetate		up	up
51	metab_5568	Organic oxygen compounds	Organooxygen compounds	Carbohydrates and carbohydrate conjugates	1-[(2R,3R,4S,5R)-3,4-Dihydroxy-5-(Hydroxymethyl)Oxolan-2-Yl]Oxypyrimidin-2-One	up
52	metab_919	Nucleosides, nucleotides, and analogues	Pyrimidine nucleosides	Not Available	1-[(2R,3S,5R)-3,4-Dihydroxy-5-(Hydroxymethyl)Oxolan-2-Yl]Pyrimidine-2,4-Dione	up
53	metab_1700	Not Available	Not Available	Not Available	1-[2-(Hydroxymethyl)Pyrrolidin-1-Yl]-2-Methyldec-8-Ene-1,3-Dione	up	up
54	metab_4968	Not Available	Not Available	Not Available	1-[3-[[6-Methyl-2-(4-Nitropyrazol-1-Yl)Pyrimidin-4-Yl]Amino]Phenyl]Ethanol	down
55	metab_8935	Organic acids and derivatives	Hydroxy acids and derivatives	Medium-chain hydroxy acids and derivatives	10-Hydroxydecanoic Acid		up	up	up
56	metab_11585	Not Available	Not Available	Not Available	11A-Hydroxy-3,6,10-Trimethyl-6,7,8,11-Tetrahydro-4H-Cyclodeca[B]Furan-2,5-Dione				up
57	metab_9870	Lipids and lipid-like molecules	Fatty Acyls	Eicosanoids	11-Dehydro-Thromboxane B2			down	down
58	metab_10076	Not Available	Not Available	Not Available	11-Dehydro-Txb3			down	down
59	metab_2550	Lipids and lipid-like molecules	Steroids and steroid derivatives	Androstane steroids	11-Hydroxyandrosterone				up
60	metab_1965	Lipids and lipid-like molecules	Fatty Acyls	Fatty acids and conjugates	12-Methyltridecanoic Acid		down
61	metab_11694	Lipids and lipid-like molecules	Fatty Acyls	Fatty acids and conjugates	12S-Hht				down
62	metab_4482	Not Available	Not Available	Not Available	13,14-Dihydro-15(R,S)-Hydroxy-16,16-Difluoro Prostaglandin E1-D4		up		up
63	metab_4827	Nucleosides, nucleotides, and analogues	Purine nucleotides	Cyclic purine nucleotides	13-Dihydrocarminomycin		up	up
64	metab_9837	Not Available	Not Available	Not Available	13-Hpotre			down	down
65	metab_9961	Lipids and lipid-like molecules	Fatty Acyls	Lineolic acids and derivatives	13-Hydroxy-9-Methoxy-10-Oxo-11-Octadecenoic Acid			down
66	metab_9885	Not Available	Not Available	Not Available	13-Hydroxyoctadeca-6,9,11-Trienoic Acid			down	down
67	metab_11523	Lipids and lipid-like molecules	Fatty Acyls	Eicosanoids	15-Keto-Prostaglandin E2			down	down
68	metab_3647	Lipids and lipid-like molecules	Fatty Acyls	Fatty acids and conjugates	15-Methylpalmitate				down
69	metab_3445	Not Available	Not Available	Not Available	15-Methylprostaglandin E1		up	up	up
70	metab_13346	Lipids and lipid-like molecules	Steroids and steroid derivatives	Hydroxysteroids	16Alpha-Hydroxyprednisolone		up	up	up
71	metab_2122	Lipids and lipid-like molecules	Fatty Acyls	Eicosanoids	16-B1-Phytoprostane				down
72	metab_9676	Lipids and lipid-like molecules	Steroids and steroid derivatives	Sulfated steroids	16Beta-Oh-Dhea Sulfate			down
73	metab_9782	Not Available	Not Available	Not Available	16-Hydroxy-9-Oxooctadeca-10,12,14-Trienoic Acid			down	down
74	metab_2792	Lipids and lipid-like molecules	Steroids and steroid derivatives	Pregnane steroids	17-Hydroxyprogesterone				up
75	metab_4680	Alkaloids and derivatives	Ajmaline-sarpagine alkaloids	Not Available	17-O-Acetylnorajmaline			down	down
76	metab_11425	Lipids and lipid-like molecules	Steroids and steroid derivatives	Androstane steroids	19-Hydroxyandrost-4-Ene-3,17-Dione			down
77	metab_2172	Lipids and lipid-like molecules	Steroids and steroid derivatives	Estrane steroids	19-Norandrostenedione				down
78	metab_3906	Lipids and lipid-like molecules	Steroids and steroid derivatives	Estrane steroids	19-Nortestosterone				up
79	metab_11198	Lipids and lipid-like molecules	Steroids and steroid derivatives	Vitamin D and derivatives	1-A,24R,25-Trihydroxyvitamin D2			down
80	metab_2452	Lipids and lipid-like molecules	Fatty Acyls	Fatty alcohols	1-Acetoxy-2-Hydroxy-16-Heptadecyn-4-One			up	up
81	metab_835	Not Available	Not Available	Not Available	1-Aminocyclobutane Carboxylic Acid				up
82	metab_633	Organoheterocyclic compounds	Pyrazolopyrimidines	Pyrazolo[3,4-d]pyrimidines	1H-Pyrazolo[3,4-D]Pyrimidin-4-Amine	up
83	metab_4706	Not Available	Not Available	Not Available	1-Hydroxy-6-Methoxyxanthen-9-One		up
84	metab_831	Nucleosides, nucleotides, and analogues	Purine nucleosides	Not Available	1-Methyladenosine				up
85	metab_5138	Nucleosides, nucleotides, and analogues	Purine nucleosides	Not Available	1-Methylguanosine	up
86	metab_7337	Organoheterocyclic compounds	Pyrroles	Substituted pyrroles	1-Methylpyrrole-2,5-Diol	up	up		up
87	metab_8541	Organic acids and derivatives	Carboxylic acids and derivatives	Amino acids, peptides, and analogues	1-Nitro-7-Hydroxy-8-Glutathionyl-7,8-Dihydronaphthalene		up
88	metab_5030	Lipids and lipid-like molecules	Glycerolipids	Monoradylglycerols	1-O-Pentylglycerol	up	up	up	up
89	metab_7278	Organic acids and derivatives	Carboxylic acids and derivatives	Amino acids, peptides, and analogues	1-Pyrroline-5-Carboxylic Acid		up		up
90	metab_9815	Organic acids and derivatives	Carboxylic acids and derivatives	Tetracarboxylic acids and derivatives	2-((2-((Dimethoxyphosphorothioyl)Thio)-4-Ethoxy-4-Oxobutanoyl)Oxy)-2-Methylmalonic Acid	up	up
91	metab_12909	Not Available	Not Available	Not Available	2-(2-Acetyl-3-Hydroxy-5-Methoxyphenyl)Acetic Acid	up
92	metab_5835	Not Available	Not Available	Not Available	2-(4-Methoxybenzoyl)-3-(2-Thienyl)Acrylonitrile		up		up
93	metab_4518	Not Available	Not Available	Not Available	2-(4-Methyl-1,4-Diazepan-1-Yl)Quinazolin-4-Amine		up	up
94	metab_6078	Organoheterocyclic compounds	Diazines	Pyrimidines and pyrimidine derivatives	2-(6-Hydroxy-4-Oxo-2-Sulfanylidene-1H-Pyrimidin-5-Yl)Propanedial			down
95	metab_9376	Not Available	Not Available	Not Available	2-(6-Hydroxyhexyl)-3-Methylidenebutanedioic Acid			up
96	metab_11464	Lipids and lipid-like molecules	Prenol lipids	Triterpenoids	2,3,23-Triacetylsericic Acid				down
97	metab_13130	Phenylpropanoids and polyketides	Stilbenes	Not Available	2',3,4',5-Tetrahydroxy-4-Prenylstilbene		up
98	metab_11288	Not Available	Not Available	Not Available	2,3-Dinor Prostaglandin E1				down
99	metab_10137	Lipids and lipid-like molecules	Fatty Acyls	Fatty acids and conjugates	2,3-Dinor-Txb1			down
100	metab_11696	Organic oxygen compounds	Organooxygen compounds	Alcohols and polyols	2,4,5,7Alpha-Tetrahydro-1,4,4,7A-Tetramethyl-1H-Inden-2-Ol				down
101	metab_11632	Not Available	Not Available	Not Available	2,4-Dihydroxy-3,5,6-Trimethylbenzoic Acid			down	down
102	metab_13564	Organic acids and derivatives	Carboxylic acids and derivatives	Amino acids, peptides, and analogues	2,4-Thiazolidinedicarboxylic Acid, 2-Methyl-	down		down
103	metab_4311	Phenylpropanoids and polyketides	Flavonoids	O-methylated flavonoids	2',5,6-Trimethoxyflavone	up
104	metab_4372	Not Available	Not Available	Not Available	2,5-Dimethyl-N-(2-Propan-2-Yl-[1,2,4]Triazolo[1,5-A]Pyridin-8-Yl)Benzamide			down	down
105	metab_852	Organoheterocyclic compounds	Furans	Furoic acid and derivatives	2,5-Furandicarboxylic Acid	down	down	down	down
106	metab_13909	Organic nitrogen compounds	Organonitrogen compounds	N-arylamides	2,6-Diamino-4-Hydroxy-5-Formamidopyrimidine				down
107	metab_1576	Benzenoids	Benzene and substituted derivatives	Benzoic acids and derivatives	2,6-Dihydroxybenzoic Acid				up
108	metab_12263	Not Available	Not Available	Not Available	2',6-Dihydroxyflavanone		up	up	up
109	metab_9435	Not Available	Not Available	Not Available	2,6-Di-Tert-Butyl-4-Nitrophenol				up
110	metab_7268	Nucleosides, nucleotides, and analogues	5''-deoxyribonucleosides	5''-deoxy-5''-thionucleosides	2-[(2-Fluorophenyl)Sulfanylmethyl]-5-[6-[(2-Hydroxycyclopentyl)Amino]Purin-9-Yl]Oxolane-3,4-Diol			up	up
111	metab_11455	Organoheterocyclic compounds	Azoles	Pyrazoles	2-[(4-Hydroxycyclohexyl)Amino]-4-(3,6,6-Trimethyl-4-Oxo-5,7-Dihydroindazol-1-Yl)Benzamide			down	down
112	metab_1799	Organoheterocyclic compounds	Diazinanes	Piperazines	2-[4-[4-(4-Carbamimidoylphenyl)Piperazin-1-Yl]Piperidin-1-Yl]Acetic Acid			down	down
113	metab_11915	Not Available	Not Available	Not Available	20-Carboxy-Ltb4		down	down	down
114	metab_7049	Organic acids and derivatives	Carboxylic acids and derivatives	Amino acids, peptides, and analogues	2-Amino-3,7-Dideoxy-D-Threo-Hept-6-Ulosonate				up
115	metab_760	Organic acids and derivatives	Carboxylic acids and derivatives	Amino acids, peptides, and analogues	2-Amino-4-[Carbamimidoyl(Methyl)Amino]Butanoic Acid				up
116	metab_5068	Not Available	Not Available	Not Available	2-Amino-4-Cresol			down
117	metab_1744	Organic acids and derivatives	Carboxylic acids and derivatives	Amino acids, peptides, and analogues	2-Amino-5-((1-((Carboxymethyl)Amino)-3-(Methylthio)-1-Oxopropan-2-Yl)Amino)-5-Oxopentanoic Acid				up
118	metab_1017	Nucleosides, nucleotides, and analogues	Purine nucleosides	Purine 2''-deoxyribonucleosides	2-Amino-9-[(2R,4S,5R)-5-(Hydroperoxymethyl)-4-Hydroxyoxolan-2-Yl]-1H-Purin-6-One			down	down
119	metab_930	Organic acids and derivatives	Carboxylic acids and derivatives	Amino acids, peptides, and analogues	2-Aminomuconic Acid Semialdehyde		up	up	up
120	metab_12506	Organic acids and derivatives	Carboxylic acids and derivatives	Amino acids, peptides, and analogues	2-Amino-N-[1-[[2-[[1-(2-Hydroxyethylamino)-1-Oxo-3-Phenylpropan-2-Yl]-Methylamino]-2-Oxoethyl]Amino]-1-Oxopropan-2-Yl]-3-(4-Hydroxyphenyl)Propanamide				up
121	metab_8831	Organoheterocyclic compounds	Lactones	Gamma butyrolactones	2-Carboxy-5,7-Dimethyl-4-Octanolide			up	up
122	metab_2927	Organic oxygen compounds	Organooxygen compounds	Carbonyl compounds	2-Cyclopenten-1-One	up
123	metab_814	Nucleosides, nucleotides, and analogues	Pyrimidine nucleosides	Pyrimidine 2''-deoxyribonucleosides	2'-Deoxycytidine	up
124	metab_13092	Lipids and lipid-like molecules	Fatty Acyls	Fatty acids and conjugates	2-Ethyl-2-Hydroxybutyric Acid				up
125	metab_7303	Organoheterocyclic compounds	Furans	Furoic acid and derivatives	2-Furoic Acid	down	down	down
126	metab_7670	Lipids and lipid-like molecules	Fatty Acyls	Fatty acids and conjugates	2-Hydroxy-3-Methylbutyric Acid				up
127	metab_4374	Organic oxygen compounds	Organooxygen compounds	Carbonyl compounds	2-Hydroxyacetophenone	up		up
128	metab_7260	Lipids and lipid-like molecules	Fatty Acyls	Fatty acids and conjugates	2-Hydroxyadipic Acid		up	up	up
129	metab_4792	Not Available	Not Available	Not Available	2-Hydroxyalternariol-9-Methyl Ether		down	down
130	metab_9646	Not Available	Not Available	Not Available	2-Hydroxyanthraquinone		up	up	up
131	metab_13144	Organic acids and derivatives	Carboxylic acids and derivatives	Carboxylic acid derivatives	2-Hydroxyethyl Methacrylate			up	up
132	metab_12058	Benzenoids	Benzene and substituted derivatives	Benzoic acids and derivatives	2-Iodobenzoic Acid			down
133	metab_12544	Organic acids and derivatives	Keto acids and derivatives	Medium-chain keto acids and derivatives	2-Keto-6-Acetamidocaproate	up	up	up	up
134	metab_14028	Organic acids and derivatives	Keto acids and derivatives	Short-chain keto acids and derivatives	2-Keto-Glutaramic Acid	up	up		up
135	metab_11843	Organoheterocyclic compounds	Benzothiazoles	Not Available	2-Mercaptobenzothiazole		down	down
136	metab_12897	Lipids and lipid-like molecules	Prenol lipids	Terpene glycosides	2''-Methoxy-(S)-Oleuropein		down
137	metab_9521	Not Available	Not Available	Not Available	2'-Methoxyformonetin	up	up	up	up
138	metab_9526	Organoheterocyclic compounds	Heteroaromatic compounds	Not Available	2-Methyl-3-Furyl Methylthiomethyl Disulfide	up	up
139	metab_9011	Benzenoids	Naphthalenes	Naphthalene sulfonic acids and derivatives	2-Naphthalenesulfonic Acid				down
140	metab_4485	Not Available	Not Available	Not Available	2-Norbornene-5,6-Dicarboxylic Anhydride	up
141	metab_5155	Nucleosides, nucleotides, and analogues	Purine nucleosides	Not Available	2-O-Methyladenosine	up
142	metab_4342	Phenylpropanoids and polyketides	Linear 1,3-diarylpropanoids	Cinnamylphenols	2'-O-Methylisoliquiritigenin	up	up	up	up
143	metab_1521	Benzenoids	Benzene and substituted derivatives	Phenylacetamides	2-Phenylacetamide		up
144	metab_5826	Organoheterocyclic compounds	Pyrrolidines	Pyrrolidones	2-Pyrrolidinone		up	up	up
145	metab_12828	Lipids and lipid-like molecules	Fatty Acyls	Fatty acids and conjugates	3-(1-Hydroxymethyl-1-Propenyl)Pentanedioic Acid	up	up	up	up
146	metab_9543	Organoheterocyclic compounds	Heteroaromatic compounds	Not Available	3-(4-Methyl-3-Pentenyl)Thiophene	down			down
147	metab_9670	Not Available	Not Available	Not Available	3-(4'O-Malonyl)Rha(1-2)Gal(1-2)Glua-Soyasaponenol B			down	down
148	metab_11727	Not Available	Not Available	Not Available	3-(5-Acetyl-2-Furyl)-5-Methoxy-2-Benzofuran-1(3H)-One		up	up	up
149	metab_13588	Organic acids and derivatives	Carboxylic acids and derivatives	Amino acids, peptides, and analogues	3-(Aminomethyl)-5-Methylhexanoic Acid		up
150	metab_1431	Not Available	Not Available	Not Available	3-(Naphthalen-1-Ylmethyl)-1H-Pyrazolo[3,4-D]Pyrimidin-4-Amine				down
151	metab_1684	Lipids and lipid-like molecules	Prenol lipids	Sesquiterpenoids	3,11,12-Trihydroxy-1(10)-Spirovetiven-2-One		up	up
152	metab_4371	Phenylpropanoids and polyketides	Flavonoids	O-methylated flavonoids	3,3',4',5,6,7,8-Heptamethoxyflavone	up
153	metab_5334	Phenylpropanoids and polyketides	Phenylpropanoic acids	Not Available	3,4-Dihydroxyhydrocinnamic Acid				down
154	metab_1990	Not Available	Not Available	Not Available	3,4-Epoxycyclohexylmethyl 3,4-Epoxycyclohexanecarboxylate		up
155	metab_4350	Lipids and lipid-like molecules	Fatty Acyls	Fatty acids and conjugates	3,4-Methylenesebacic Acid	up
156	metab_7445	Nucleosides, nucleotides, and analogues	Purine nucleotides	Cyclic purine nucleotides	3',5'-Cyclic Gmp	down	down
157	metab_7331	Organic acids and derivatives	Carboxylic acids and derivatives	Amino acids, peptides, and analogues	3,5-Dihydroxyphenylglycine				up
158	metab_10037	Phenylpropanoids and polyketides	Flavonoids	Flavones	3,7,4'-Trihydroxyflavone		up	up	up
159	metab_4185	Not Available	Not Available	Not Available	3,7-Dihydroxyflavone		up	up	up
160	metab_2357	Not Available	Not Available	Not Available	3-[[4-[1-(Pyridin-3-Ylmethyl)Piperidin-4-Yl]Oxypiperidin-1-Yl]Methyl]Pyridine				up
161	metab_3253	Lipids and lipid-like molecules	Steroids and steroid derivatives	Bile acids, alcohols and derivatives	3A,7A,12A-Trihydroxy-5B-Cholestan-26-Al		up	up
162	metab_4735	Not Available	Not Available	Not Available	3-Amino-2-(1-Pyrrolidinylcarbonyl)-4(3H)-Quinazolinone	up		up
163	metab_11997	Lipids and lipid-like molecules	Fatty Acyls	Fatty acids and conjugates	3-Carboxy-4-Methyl-5-Pentyl-2-Furanpropanoic Acid		down	down	down
164	metab_14653	Organic acids and derivatives	Carboxylic acids and derivatives	Amino acids, peptides, and analogues	3-Cyano-L-Alanine	up	up	up	up
165	metab_937	Not Available	Not Available	Not Available	3-Cyclopropyl-6-Pyrrolidin-1-Yl-[1,2,4]Triazolo[4,3-B]Pyridazine	up	up	up	up
166	metab_5126	Organic acids and derivatives	Carboxylic acids and derivatives	Amino acids, peptides, and analogues	3''-Deamino-3''-Oxonicotianamine			down
167	metab_7813	Organic oxygen compounds	Organooxygen compounds	Carbonyl compounds	3-Dehydroshikimate	up		up
168	metab_1630	Not Available	Not Available	Not Available	3-Desoxy-3,4-Methylenedioxy Pyrovalerone	up	up	up	up
169	metab_4314	Not Available	Not Available	Not Available	3-Fluoro-4-Methoxy-N-([1,2,4]Triazolo[4,3-A]Pyridin-8-Yl)Benzamide		up	up	up
170	metab_7662	Organoheterocyclic compounds	Oxazinanes	Morpholines	3-Fluorophenmetrazine	up
171	metab_1492	Not Available	Not Available	Not Available	3-Hydroxy-C10-Homoserine Lactone		up
172	metab_4964	Lipids and lipid-like molecules	Fatty Acyls	Fatty acid esters	3-Hydroxyhexanoylcarnitine	up	up	up	up
173	metab_1737	Lipids and lipid-like molecules	Fatty Acyls	Fatty acid esters	3-Hydroxynona-5,7-Dienoylcarnitine	up	up	up
174	metab_6884	Organic acids and derivatives	Hydroxy acids and derivatives	Beta hydroxy acids and derivatives	3-Hydroxypyruvic Acid	up	up	up	up
175	metab_9996	Lipids and lipid-like molecules	Fatty Acyls	Fatty acid esters	3-Hydroxytridecanoyl Carnitine			down	down
176	metab_7096	Organic acids and derivatives	Carboxylic acids and derivatives	Carboxylic acids	3-Iodopropanoic Acid	down	down	down	down
177	metab_12773	Lipids and lipid-like molecules	Fatty Acyls	Fatty acids and conjugates	3-Isopropylmalic Acid				up
178	metab_8752	Organoheterocyclic compounds	Benzopyrans	1-benzopyrans	3-Methoxy-2-(4-Methylbenzoyl)-4H-1-Benzopyran-4-One			down
179	metab_11491	Lipids and lipid-like molecules	Fatty Acyls	Fatty acids and conjugates	3-Methyl-5-Pentyl-2-Furanheptanoic Acid			down	down
180	metab_8442	Lipids and lipid-like molecules	Fatty Acyls	Fatty acids and conjugates	3-Methyladipic Acid	up
181	metab_1404	Benzenoids	Benzene and substituted derivatives	Benzoic acids and derivatives	3-Methylsalicylic Acid			down
182	metab_5329	Not Available	Not Available	Not Available	3-Morpholin-4-Yl-1-Propan-2-Ylpyrazin-2-One				up
183	metab_9652	Phenylpropanoids and polyketides	Flavonoids	Flavans	3-O-Acetylpinobanksin		up	up	up
184	metab_13727	Nucleosides, nucleotides, and analogues	Purine nucleosides	Not Available	3'-O-Methylguanosine	up
185	metab_9747	Phenylpropanoids and polyketides	Flavonoids	O-methylated flavonoids	3-O-Methylkaempferol		up
186	metab_6729	Organic acids and derivatives	Organic carbonic acids and derivatives	Ureas	3-Ureidopropionic Acid	up	up	up	up
187	metab_12241	Benzenoids	Benzene and substituted derivatives	Benzenesulfonyl compounds	4,4'-Sulfonyldiphenol		down
188	metab_5236	Organic acids and derivatives	Carboxylic acids and derivatives	Amino acids, peptides, and analogues	4,5-Seco-Dopa	up	up	up	up
189	metab_1930	Not Available	Not Available	Not Available	4',6-Dihydroxyflavone		up	up	up
190	metab_1720	Not Available	Not Available	Not Available	4,7-Dihydroxyflavone			up	up
191	metab_5741	Organic acids and derivatives	Carboxylic acids and derivatives	Amino acids, peptides, and analogues	4-Acetamidobutanoic Acid		up		up
192	metab_4793	Nucleosides, nucleotides, and analogues	Pyrimidine nucleosides	Pyrimidine 2'',3''-dideoxyribonucleosides	4-Amino-1-[(2R,5R)-5-(Hydroxymethyl)-4-Sulfanyloxolan-2-Yl]Pyrimidin-2-One			down
193	metab_4521	Not Available	Not Available	Not Available	4-Amino-2-[Butyl(Methyl)Amino]-N-Phenylpyrimidine-5-Carboxamide				up
194	metab_5766	Organic acids and derivatives	Carboxylic acids and derivatives	Amino acids, peptides, and analogues	4-Amino-3-Hydroxybutyric Acid				up
195	metab_5403	Benzenoids	Benzene and substituted derivatives	Benzoic acids and derivatives	4-Aminobenzoate			up	up
196	metab_8115	Phenylpropanoids and polyketides	Cinnamic acids and derivatives	Hydroxycinnamic acids and derivatives	4-Demethylsimmondsin 2'-(E)-Ferulate				up
197	metab_9322	Organic acids and derivatives	Carboxylic acids and derivatives	Amino acids, peptides, and analogues	4-Ethoxymethylene-2-Phenyl-2-Oxazolin-5-One		up	up	up
198	metab_12820	Organic oxygen compounds	Organooxygen compounds	Carbonyl compounds	4-Ethyl-2-Hydroxy-3-Methyl-2-Cyclopenten-1-One		up		up
199	metab_9660	Benzenoids	Phenols	Benzenediols	4-Hexylresorcinol				down
200	metab_9026	Organic acids and derivatives	Carboxylic acids and derivatives	Amino acids, peptides, and analogues	4-Hydroxy Nonenal Glutathione			up	up
201	metab_4998	Organoheterocyclic compounds	Piperidines	Not Available	4-Hydroxy-2,2,6,6-Tetramethylpiperidine-1-Oxyl	up	up	up	up
202	metab_4190	Not Available	Not Available	Not Available	4'-Hydroxy-5-Methoxyflavone		up	up	up
203	metab_4724	Benzenoids	Phenols	4-alkoxyphenols	4-Hydroxy-Alprenolol	up	up	up	up
204	metab_4872	Benzenoids	Benzene and substituted derivatives	Benzoic acids and derivatives	4-Hydroxybenzoic Acid			down
205	metab_9173	Organoheterocyclic compounds	Benzodiazepines	Not Available	4'-Hydroxyclobazam		up	up	up
206	metab_4914	Lipids and lipid-like molecules	Fatty Acyls	Fatty acid esters	4-Hydroxyhexanoycarnitine	up	up	up	up
207	metab_8982	Organic acids and derivatives	Carboxylic acids and derivatives	Amino acids, peptides, and analogues	4-Hydroxynonenal Glutathione				up
208	metab_1994	Benzenoids	Phenols	1-hydroxy-2-unsubstituted benzenoids	4-Hydroxyphenylglycolic Acid	up
209	metab_2119	Benzenoids	Benzene and substituted derivatives	Benzoyl derivatives	4-Methoxybenzaldehyde		up	up	up
210	metab_1951	Phenylpropanoids and polyketides	Coumarins and derivatives	Not Available	4-Methylcoumarin		up	up	up
211	metab_1929	Not Available	Not Available	Not Available	4-Methyl-N-(2-Propan-2-Yl-[1,2,4]Triazolo[1,5-A]Pyridin-8-Yl)Benzamide			down	down
212	metab_4592	Phenylpropanoids and polyketides	Coumarins and derivatives	Coumarin glycosides	4-Methylumbelliferone Glucuronide			up
213	metab_9165	Benzenoids	Phenols	Nitrophenols	4-Nitrophenol			up	up
214	metab_459	Organoheterocyclic compounds	Lactams	Beta lactams	4-Oxo-2-Azetidinecarboxylic Acid			up	up
215	metab_1751	Not Available	Not Available	Not Available	4-Oxo-4-(3-Oxodecan-2-Ylamino)Butanoic Acid			down	down
216	metab_4848	Lipids and lipid-like molecules	Fatty Acyls	Fatty amides	5-((6-((Aminomethyl)Amino)-1-Oxohexyl)Amino)Pentanoic Acid	up		up
217	metab_7919	Organoheterocyclic compounds	Pyridines and derivatives	Hydropyridines	5-(2'-Carboxyethyl)-4,6-Dihydroxypicolinate				up
218	metab_2094	Not Available	Not Available	Not Available	5,4'-Dimethoxy-7-Hydroxyflavone	up	up	up	up
219	metab_5605	Phenylpropanoids and polyketides	Isoflavonoids	Isoflavans	5,7,8-Trihydroxyflavanone 7-Glucoside			up	up
220	metab_9855	Lipids and lipid-like molecules	Fatty Acyls	Fatty acyl glycosides	5,7-Megastigmadien-9-Ol Glucoside			down	down
221	metab_1393	Lipids and lipid-like molecules	Fatty Acyls	Fatty acids and conjugates	5,8,11-Eicosatrienoic Acid			up	up
222	metab_4390	Not Available	Not Available	Not Available	5-[4-(4-Ethylpiperazine-1-Carbonyl)Piperidin-1-Yl]-2-Propylpyridazin-3-One				down
223	metab_9504	Organic oxygen compounds	Organooxygen compounds	Carbohydrates and carbohydrate conjugates	5A,6A-Epoxy-7E-Megastigmene-3A,9E-Diol 3-Glucoside				down
224	metab_3879	Not Available	Not Available	Not Available	5-Alpha-Pregnan-3-Beta,17,21-Triol-11,20-Dione				up
225	metab_8230	Organoheterocyclic compounds	Diazines	Pyrimidines and pyrimidine derivatives	5-Benzylacyclouridine		up
226	metab_4721	Nucleosides, nucleotides, and analogues	5''-deoxyribonucleosides	Not Available	5'-Deoxy-5-Fluorocytidine				up
227	metab_8864	Nucleosides, nucleotides, and analogues	5''-deoxyribonucleosides	Not Available	5'-Deoxy-5-Fluorouridine		down		down
228	metab_14003	Organoheterocyclic compounds	Pyrans	Not Available	5-Formyl-2H-Pyran-6-Carboxamide	up
229	metab_7497	Nucleosides, nucleotides, and analogues	Purine nucleotides	Purine ribonucleotides	5'-Guanylic Acid	down
230	metab_11307	Organoheterocyclic compounds	Lactones	Gamma butyrolactones	5-Heptyltetrahydro-2-Oxo-3-Furancarboxylic Acid		down	down	down
231	metab_12340	Organoheterocyclic compounds	Lactones	Gamma butyrolactones	5-Hexyltetrahydro-2-Oxo-3-Furancarboxylic Acid				up
232	metab_8077	Organoheterocyclic compounds	Isoindoles and derivatives	Isoindolines	5-Hydroxy-3-(4-Hydroxyphenyl)-6-Methoxy-7-[(2S,4S,5S)-3,4,5-Trihydroxy-6-(Hydroxymethyl)Oxan-2-Yl]Oxychromen-4-One	down	down	down	down
233	metab_7549	Benzenoids	Benzene and substituted derivatives	Nitrobenzenes	5-Hydroxy-3-[[5-(4-Nitrophenyl)Furan-2-Yl]Methylideneamino]-1H-Imidazol-2-One		up	up
234	metab_4705	Lipids and lipid-like molecules	Prenol lipids	Sesquiterpenoids	5-Hydroxy-4-Methoxybisabola-2,10-Dien-9-One		up
235	metab_9263	Organoheterocyclic compounds	Benzofurans	Not Available	5-Hydroxybenzofuran-2(3H)-One				up
236	metab_7431	Organic acids and derivatives	Hydroxy acids and derivatives	Medium-chain hydroxy acids and derivatives	5-Keto-D-Gluconate	up	up
237	metab_6950	Organic acids and derivatives	Carboxylic acids and derivatives	Amino acids, peptides, and analogues	5-L-Glutamyl-L-Alanine				down
238	metab_1902	Not Available	Not Available	Not Available	5-Methoxy-Dl-Tryptophan				down
239	metab_5379	Organoheterocyclic compounds	Diazines	Pyrimidines and pyrimidine derivatives	5-Methylcytosine	up
240	metab_891	Nucleosides, nucleotides, and analogues	Pyrimidine nucleosides	Pyrimidine 2''-deoxyribonucleosides	5-Methyldeoxycytidine	up		down
241	metab_9709	Not Available	Not Available	Not Available	5-O-Methylbiochanin A	up	up	up	up
242	metab_14701	Organic acids and derivatives	Carboxylic acids and derivatives	Amino acids, peptides, and analogues	6-(2-Amino-2-Carboxyethyl)-4-Hydroxybenzothiazole	down
243	metab_5435	Organic oxygen compounds	Organooxygen compounds	Carbohydrates and carbohydrate conjugates	6-(Methylsulfonyl)Hexyl Glucosinolate			up	up
244	metab_4383	Not Available	Not Available	Not Available	6,2'-Dihydroxyflavanone	up	up	up	up
245	metab_1927	Not Available	Not Available	Not Available	6,4'-Dihydroxyflavone		up	up	up
246	metab_11499	Not Available	Not Available	Not Available	6,7,8-Triphenyl-2,3-Dihydro[1,2,4]Triazolo[4,3-B]Pyridazin-3-One			down	down
247	metab_12533	Not Available	Not Available	Not Available	6-Chloro-2-Picolinic Acid		up		down
248	metab_796	Organoheterocyclic compounds	Imidazopyrimidines	Purines and purine derivatives	6-Hydroxy-2-Aminopurine	up
249	metab_3755	Not Available	Not Available	Not Available	6-Hydroxy-4'-Methoxyflavone		up	up	up
250	metab_4697	Lipids and lipid-like molecules	Fatty Acyls	Fatty acid esters	6-Hydroxydodeca-8,10-Dienoylcarnitine		up
251	metab_1451	Lipids and lipid-like molecules	Fatty Acyls	Fatty acid esters	6-Hydroxyheptanoylcarnitine	up	up	up	up
252	metab_1696	Lipids and lipid-like molecules	Fatty Acyls	Fatty acid esters	6-Hydroxynon-7-Enoylcarnitine	up	up	up
253	metab_1895	Not Available	Not Available	Not Available	6'-Malonyl Ononin		up	up	up
254	metab_9197	Lipids and lipid-like molecules	Fatty Acyls	Fatty alcohols	6-Methyl-2-Methylene-6-Octene-1,3,8-Triol			up
255	metab_8206	Benzenoids	Benzene and substituted derivatives	Benzoic acids and derivatives	6-O-Galloylsucrose			up	up
256	metab_13983	Organic acids and derivatives	Carboxylic acids and derivatives	Amino acids, peptides, and analogues	6-Oxopiperidine-2-Carboxylic Acid		up	up	up
257	metab_10046	Not Available	Not Available	Not Available	7,2'-Dihydroxyflavone		up	up	up
258	metab_8813	Not Available	Not Available	Not Available	7,3'-Dihydroxyflavone		up	up	up
259	metab_11963	Phenylpropanoids and polyketides	Flavonoids	Flavones	7,4'-Dihydroxyflavone		up	up	up
260	metab_6658	Organoheterocyclic compounds	Pteridines and derivatives	Pterins and derivatives	7,8-Dihydroneopterin 3'-Phosphate			down
261	metab_4784	Not Available	Not Available	Not Available	7-[2-Hydroxy-3-(4-Pyridin-2-Ylpiperazin-1-Yl)Propoxy]-4-Methylchromen-2-One			up
262	metab_13696	Organic acids and derivatives	Carboxylic acids and derivatives	Amino acids, peptides, and analogues	7-Aminocephalosporanic Acid			down
263	metab_2102	Not Available	Not Available	Not Available	7-Beta-Hydroxylathyrol		down	down	down
264	metab_1237	Not Available	Not Available	Not Available	7-Ethylguanine	up
265	metab_11294	Not Available	Not Available	Not Available	7-Hydroxy-2'-Methoxyflavone		up	up	up
266	metab_11303	Not Available	Not Available	Not Available	7-Hydroxy-2'-Methoxyisoflavone		up	up	up
267	metab_9657	Not Available	Not Available	Not Available	7-Hydroxy-3(4-Methoxyphenyl)Coumarin		up	up	up
268	metab_11432	Not Available	Not Available	Not Available	7-Hydroxy-3'-Methoxyflavone		up	up	up
269	metab_1920	Organoheterocyclic compounds	Benzofurans	Not Available	7-Methyl-2-Benzofurancarboxaldehyde	up		up
270	metab_4728	Not Available	Not Available	Not Available	7-Methyl-9-[1-(2-Phenylacetyl)Piperidin-4-Yl]Purin-8-One			down	down
271	metab_880	Organoheterocyclic compounds	Imidazopyrimidines	Purines and purine derivatives	7-Methylguanine			up
272	metab_8449	Nucleosides, nucleotides, and analogues	Purine nucleosides	Not Available	7-Methylxanthosine			up	up
273	metab_3533	Not Available	Not Available	Not Available	7-O-Methylchrysin		up	up	up
274	metab_11297	Not Available	Not Available	Not Available	8-(3-Oxo-2-(Pent-2-Enyl) Cyclopentenyl)Octanoic Acid		down	down	down
275	metab_12192	Nucleosides, nucleotides, and analogues	Purine nucleosides	Purine 2''-deoxyribonucleosides	8-Hydroxy-2-Desoxyguanosine	up	up
276	metab_636	Organoheterocyclic compounds	Imidazopyrimidines	Purines and purine derivatives	8-Hydroxyadenine	up
277	metab_11422	Lipids and lipid-like molecules	Fatty Acyls	Fatty acids and conjugates	9(10)-Epode			down	down
278	metab_12184	Not Available	Not Available	Not Available	9-(Methoxycarbonyl)Dec-9-Enoic Acid				down
279	metab_9859	Lipids and lipid-like molecules	Fatty Acyls	Lineolic acids and derivatives	9(S)-Hotre			down	down
280	metab_11682	Lipids and lipid-like molecules	Fatty Acyls	Fatty acids and conjugates	9,10-Epoxyoctadecanoic Acid			down	down
281	metab_11318	Lipids and lipid-like molecules	Fatty Acyls	Lineolic acids and derivatives	9,10-Epoxystearic Acid			down	down
282	metab_3415	Lipids and lipid-like molecules	Fatty Acyls	Eicosanoids	9-Hepe			down
283	metab_10069	Lipids and lipid-like molecules	Fatty Acyls	Fatty acyl glycosides	9-Hydroxy-7-Megastigmen-3-One Glucoside		down	down	down
284	metab_11500	Not Available	Not Available	Not Available	9-Oxootre		down	down	down
285	metab_7736	Nucleosides, nucleotides, and analogues	5''-deoxyribonucleosides	Not Available	Abeado	up
286	metab_8071	Nucleosides, nucleotides, and analogues	Purine nucleosides	Not Available	Ab-Meca	up
287	metab_9272	Lipids and lipid-like molecules	Prenol lipids	Sesquiterpenoids	Abscisic Acid		down	down	down
288	metab_11597	Lipids and lipid-like molecules	Prenol lipids	Sesquiterpenoids	Abscisic Alcohol			down	down
289	metab_428	Not Available	Not Available	Not Available	Aceclidine		up	up	up
290	metab_9501	Benzenoids	Naphthalenes	Naphthoquinones	Acetylshikonin	up
291	metab_13993	Organic acids and derivatives	Carboxylic acids and derivatives	Tricarboxylic acids and derivatives	Aconitic Acid	down	down	down
292	metab_5648	Organic acids and derivatives	Carboximidic acids and derivatives	Carboximidic acids	Acrylamide		up	up	up
293	metab_14138	Organoheterocyclic compounds	Imidazopyrimidines	Purines and purine derivatives	Adenine	up
294	metab_7451	Nucleosides, nucleotides, and analogues	Purine nucleosides	Not Available	Adenosine		down
295	metab_7391	Nucleosides, nucleotides, and analogues	Ribonucleoside 3''-phosphates	Not Available	Adenosine 3'-Monophosphate	down	down	down	down
296	metab_935	Nucleosides, nucleotides, and analogues	Purine nucleotides	Purine ribonucleotides	Adenosine Monophosphate	down	down	down
297	metab_5664	Nucleosides, nucleotides, and analogues	Purine nucleotides	Purine ribonucleotides	Adenylo-Succinate			up	up
298	metab_13049	Lipids and lipid-like molecules	Fatty Acyls	Fatty acids and conjugates	Adipate Semialdehyde			up	up
299	metab_4569	Organic oxygen compounds	Organooxygen compounds	Carbonyl compounds	Adlupulone		up	up	up
300	metab_1916	Lipids and lipid-like molecules	Prenol lipids	Sesquiterpenoids	Aflatoxin P1		up	up	up
301	metab_4436	Phenylpropanoids and polyketides	Coumarins and derivatives	Furanocoumarins	Aflatoxin Q1	up
302	metab_13324	Organoheterocyclic compounds	Diazines	Pyrimidines and pyrimidine derivatives	Afn911			down
303	metab_9720	Lipids and lipid-like molecules	Prenol lipids	Terpene glycosides	Akebia Saponin D		down
304	metab_5437	Not Available	Not Available	Not Available	Ala Asn Glu		up	up	up
305	metab_4995	Not Available	Not Available	Not Available	Ala Asp Ile	up
306	metab_1326	Not Available	Not Available	Not Available	Ala Glu Ile	up
307	metab_1011	Not Available	Not Available	Not Available	Ala Ile Asn	up
308	metab_7478	Not Available	Not Available	Not Available	Ala Tyr			down	down
309	metab_14616	Organic acids and derivatives	Carboxylic acids and derivatives	Amino acids, peptides, and analogues	Ala-Gly				down
310	metab_4392	Lipids and lipid-like molecules	Prenol lipids	Terpene lactones	Alantolactone			down	down
311	metab_14485	Organic acids and derivatives	Carboxylic acids and derivatives	Amino acids, peptides, and analogues	Allantoic Acid				down
312	metab_14528	Organic oxygen compounds	Organooxygen compounds	Carbohydrates and carbohydrate conjugates	Alpha-D-Glucose	up		up
313	metab_11914	Organic oxygen compounds	Organooxygen compounds	Carbohydrates and carbohydrate conjugates	Alpha-D-Xylopyranosyl-(1->6)-Beta-D-Glucopyranosyl-(1->4)-D-Glucose	up		up
314	metab_13089	Organic acids and derivatives	Keto acids and derivatives	Short-chain keto acids and derivatives	Alpha-Ketoisovaleric Acid		up	up	up
315	metab_3911	Organic nitrogen compounds	Organonitrogen compounds	Amines	Alpha-Linolenoyl Ethanolamide				down
316	metab_2228	Benzenoids	Benzene and substituted derivatives	Biphenyls and derivatives	Amarogentin				down
317	metab_4669	Benzenoids	Benzene and substituted derivatives	Benzenesulfonamides	Amprenavir	up		up
318	metab_2776	Lipids and lipid-like molecules	Prenol lipids	Diterpenoids	Annoglabasin C			up	up
319	metab_5390	Organoheterocyclic compounds	Azoles	Pyrazoles	Antipyrine	up	up	up	up
320	metab_2684	Lipids and lipid-like molecules	Prenol lipids	Diterpenoids	Aphidicolin			up	up
321	metab_9701	Phenylpropanoids and polyketides	Flavonoids	Hydroxyflavonoids	Apigenidin	up	up		up
322	metab_9573	Phenylpropanoids and polyketides	Flavonoids	Flavones	Apigenin	down
323	metab_8632	Phenylpropanoids and polyketides	Flavonoids	Flavonoid glycosides	Apigenin 7-[Rhamnosyl-(1->2)-Galacturonide]	up
324	metab_2013	Phenylpropanoids and polyketides	Flavonoids	Flavonoid glycosides	Apigenin 7-Di-O-Xyloside		up	up	up
325	metab_12240	Not Available	Not Available	Not Available	Apigenin 7-Galacturonide		up	up	up
326	metab_8736	Phenylpropanoids and polyketides	Flavonoids	Flavonoid glycosides	Apigenin 7-O-(2''-O-Acetylglucoside)			up
327	metab_13544	Organic oxygen compounds	Organooxygen compounds	Carbohydrates and carbohydrate conjugates	Apiosylglucosyl 4-Hydroxybenzoate			down
328	metab_1854	Phenylpropanoids and polyketides	Coumarins and derivatives	Furanocoumarins	Apiumoside	up	up	up	up
329	metab_4067	Lipids and lipid-like molecules	Prenol lipids	Terpene glycosides	Araliasaponin I		down
330	metab_1381	Lignans, neolignans and related compounds	Lignan glycosides	Not Available	Arctiin	up	up	up	up
331	metab_4690	Organic acids and derivatives	Carboxylic acids and derivatives	Amino acids, peptides, and analogues	Arginyltryptophan		up	up	up
332	metab_5407	Phenylpropanoids and polyketides	Flavonoids	Flavonoid glycosides	Aromadendrin 3-Rhamnoside			up	up
333	metab_11147	Lipids and lipid-like molecules	Sphingolipids	Glycosphingolipids	As 1-1		down	down	down
334	metab_11110	Lipids and lipid-like molecules	Sphingolipids	Glycosphingolipids	As 1-2			down	down
335	metab_5047	Not Available	Not Available	Not Available	Asn Thr Ile	up
336	metab_1817	Organic acids and derivatives	Carboxylic acids and derivatives	Amino acids, peptides, and analogues	Asp F I	up	up	up	up
337	metab_1727	Not Available	Not Available	Not Available	Asp Ile Ile	up
338	metab_9842	Organic oxygen compounds	Organooxygen compounds	Carbohydrates and carbohydrate conjugates	Aspartylglycosamine				down
339	metab_1449	Organic acids and derivatives	Carboxylic acids and derivatives	Amino acids, peptides, and analogues	Aspartyl-Isoleucine	down
340	metab_5585	Organic acids and derivatives	Carboxylic acids and derivatives	Amino acids, peptides, and analogues	Aspartyl-Proline			up	up
341	metab_6921	Organic acids and derivatives	Carboxylic acids and derivatives	Amino acids, peptides, and analogues	Asp-Glu				down
342	metab_1589	Phenylpropanoids and polyketides	Flavonoids	Flavonoid glycosides	Astilbin		up
343	metab_10539	Organoheterocyclic compounds	Diazinanes	Piperazines	Atevirdine			up	up
344	metab_4306	Lipids and lipid-like molecules	Prenol lipids	Terpene lactones	Atractylenolide Iii				down
345	metab_2648	Phenylpropanoids and polyketides	Linear 1,3-diarylpropanoids	Chalcones and dihydrochalcones	Avobenzone		up
346	metab_3600	Not Available	Not Available	Not Available	Azacyclotridecan-2-One		down
347	metab_9286	Lipids and lipid-like molecules	Fatty Acyls	Fatty acids and conjugates	Azelaic Acid	up
348	metab_8986	Organoheterocyclic compounds	Benzopyrans	1-benzopyrans	Baicalein		up	up	up
349	metab_4446	Phenylpropanoids and polyketides	Flavonoids	Flavonoid glycosides	Baicalin		up	up	up
350	metab_2189	Not Available	Not Available	Not Available	Bakkenolide A			down	down
351	metab_9688	Organic oxygen compounds	Organooxygen compounds	Carbohydrates and carbohydrate conjugates	B-D-Xylopyranosyl-(1->4)-A-L-Rhamnopyranosyl-(1->2)-L-Arabinose			down	down
352	metab_7489	Benzenoids	Phenols	Benzenediols	Benzamide, 3-(3-((2-(3,4-Dihydroxyphenyl)Ethyl)Amino)Butyl)-	up
353	metab_13548	Not Available	Not Available	Not Available	Benzoic Acid+1O,1Meo,O-Hex			up
354	metab_5647	Organic acids and derivatives	Carboxylic acids and derivatives	Amino acids, peptides, and analogues	Beta-Alanine		up		up
355	metab_5833	Organoheterocyclic compounds	Imidazopyrimidines	Purines and purine derivatives	Beta-D-3-Ribofuranosyluric Acid			down
356	metab_13299	Organic oxygen compounds	Organooxygen compounds	Carbohydrates and carbohydrate conjugates	Beta-D-Galactopyranosyl-(1->4)-2-Amino-2-Deoxy-Beta-D-Glucopyranosyl-(1->6)-D-Mannose		down
357	metab_4460	Organic oxygen compounds	Organooxygen compounds	Carbohydrates and carbohydrate conjugates	Beta-D-Glucopyranuronic Acid		down
358	metab_12480	Lipids and lipid-like molecules	Steroids and steroid derivatives	Steroid esters	Beta-Estradiol 17-Propionate	up	up		up
359	metab_4880	Benzenoids	Phenols	Tyrosols and derivatives	Betaxolol			up	up
360	metab_11646	Phenylpropanoids and polyketides	Isoflavonoids	O-methylated isoflavonoids	Biochanin A		up	up	up
361	metab_1115	Nucleosides, nucleotides, and analogues	Purine nucleotides	Purine ribonucleotides	Biotinyl-5'-Amp		up	up	up
362	metab_9851	Organic nitrogen compounds	Organonitrogen compounds	Amines	Biperiden				down
363	metab_4850	Organoheterocyclic compounds	Indoles and derivatives	Pyridoindoles	Biriperone			up
364	metab_7082	Organic acids and derivatives	Peptidomimetics	Hybrid peptides	Bis-Gamma-Glutamylcysteinylbis-Beta-Alanine			up	up
365	metab_1719	Benzenoids	Benzene and substituted derivatives	Benzylethers	Bisoprolol				down
366	metab_9578	Lipids and lipid-like molecules	Fatty Acyls	Fatty acyl glycosides	Blumenol C Glucoside		down	down	down
367	metab_1883	Organoheterocyclic compounds	Naphthopyrans	Not Available	Borapetoside		up	up	up
368	metab_12501	Organoheterocyclic compounds	Indoles and derivatives	Indoles	Bucindolol				down
369	metab_8229	Organoheterocyclic compounds	Indoles and derivatives	Tryptamines and derivatives	Bufotenin		up
370	metab_4563	Organoheterocyclic compounds	Benzofurans	Not Available	Bufuralol				down
371	metab_1597	Organic acids and derivatives	Carboxylic acids and derivatives	Amino acids, peptides, and analogues	Bursin				down
372	metab_8702	Benzenoids	Phenanthrenes and derivatives	Not Available	Butorphanol	up
373	metab_3899	Organoheterocyclic compounds	Naphthofurans	Not Available	Cafestol			down	down
374	metab_11830	Lipids and lipid-like molecules	Prenol lipids	Terpene glycosides	Canavalioside		up	up	up
375	metab_4709	Organic acids and derivatives	Carboxylic acids and derivatives	Dicarboxylic acids and derivatives	Candoxatrilat		up
376	metab_4377	Phenylpropanoids and polyketides	Coumarins and derivatives	Not Available	Capillarisin		up	up	up
377	metab_1758	Benzenoids	Phenols	Methoxyphenols	Capsaicin				down
378	metab_10048	Benzenoids	Phenols	Methoxyphenols	Capsiate				down
379	metab_4621	Not Available	Not Available	Not Available	Cardamonin		up	up	up
380	metab_1166	Benzenoids	Benzene and substituted derivatives	Anilides	Carotamine				up
381	metab_4991	Lipids and lipid-like molecules	Prenol lipids	Monoterpenoids	Carvone	up	up	up	up
382	metab_7289	Organoheterocyclic compounds	Naphthopyrans	Naphthopyranones	Cassiaside	up	up	up	up
383	metab_9245	Phenylpropanoids and polyketides	Tannins	Hydrolyzable tannins	Castacrenin B		down	down	down
384	metab_12972	Phenylpropanoids and polyketides	Flavonoids	Flavonoid glycosides	Catechin 7-Glucoside				up
385	metab_1896	Organoheterocyclic compounds	Lactams	Beta lactams	Cefminox		up	up	up
386	metab_12573	Organoheterocyclic compounds	Lactams	Beta lactams	Ceftizoxime Alapivoxil		down	down
387	metab_11077	Lipids and lipid-like molecules	Sphingolipids	Ceramides	Cer(D16:1/16:0)	up			down
388	metab_10222	Lipids and lipid-like molecules	Sphingolipids	Ceramides	Cer(D18:1/12:0)		down	down	down
389	metab_11034	Lipids and lipid-like molecules	Sphingolipids	Ceramides	Cer(D18:1/14:0)		down	down	down
390	metab_10339	Not Available	Not Available	Not Available	Cer[As](D34:1)	up	down	down	down
391	metab_10347	Lipids and lipid-like molecules	Fatty Acyls	Fatty acids and conjugates	Cerebronic Acid			up	up
392	metab_4570	Not Available	Not Available	Not Available	Chrysin-7-O-Glucuronide		up	up	up
393	metab_10053	Lipids and lipid-like molecules	Fatty Acyls	Lineolic acids and derivatives	Cibaric Acid				down
394	metab_622	Nucleosides, nucleotides, and analogues	Pyrimidine nucleotides	Cyclic pyrimidine nucleotides	Cifostodine	down	down		down
395	metab_2454	Lipids and lipid-like molecules	Fatty Acyls	Eicosanoids	Ciprostene			down
396	metab_7524	Organic acids and derivatives	Carboxylic acids and derivatives	Amino acids, peptides, and analogues	Citiolone				up
397	metab_7554	Lipids and lipid-like molecules	Fatty Acyls	Fatty acids and conjugates	Citraconic Acid	up			up
398	metab_7306	Organic acids and derivatives	Carboxylic acids and derivatives	Tricarboxylic acids and derivatives	Citric Acid	down	down	down
399	metab_5763	Organic acids and derivatives	Carboxylic acids and derivatives	Amino acids, peptides, and analogues	Citrulline		up	up	up
400	metab_13867	Not Available	Not Available	Not Available	Coptisine				up
401	metab_11631	Lipids and lipid-like molecules	Fatty Acyls	Lineolic acids and derivatives	Corchorifatty Acid A				down
402	metab_11461	Lipids and lipid-like molecules	Fatty Acyls	Fatty acids and conjugates	Coronaric Acid				down
403	metab_2839	Lipids and lipid-like molecules	Steroids and steroid derivatives	Hydroxysteroids	Corticosterone				up
404	metab_1604	Lipids and lipid-like molecules	Steroids and steroid derivatives	Hydroxysteroids	Cortisone		up	up	up
405	metab_2069	Lipids and lipid-like molecules	Prenol lipids	Terpene lactones	Costunolide			down	down
406	metab_8177	Nucleosides, nucleotides, and analogues	Pyrimidine nucleotides	Pyrimidine ribonucleotides	Cotinine Glucuronide		down		down
407	metab_2009	Not Available	Not Available	Not Available	Cuneatin Methyl Ether			down
408	metab_1824	Not Available	Not Available	Not Available	Cycloheptyl-(4-Hydroxy-1-Oxa-9-Azaspiro[5.5]Undecan-9-Yl)Methanone	down		down	down
409	metab_4657	Organoheterocyclic compounds	Piperidines	Piperidinones	Cycloheximide	up	up	up	up
410	metab_5662	Organic acids and derivatives	Carboxylic acids and derivatives	Amino acids, peptides, and analogues	Cycloleucine				up
411	metab_6073	Organic nitrogen compounds	Organonitrogen compounds	Nitrogen mustard compounds	Cyclophosphamide			down
412	metab_14648	Organic acids and derivatives	Carboxylic acids and derivatives	Amino acids, peptides, and analogues	Cystathionine				up
413	metab_14414	Organic acids and derivatives	Carboxylic acids and derivatives	Amino acids, peptides, and analogues	Cysteineglutathione Disulfide			up	up
414	metab_619	Nucleosides, nucleotides, and analogues	Pyrimidine nucleosides	Not Available	Cytarabine	up
415	metab_630	Organoheterocyclic compounds	Diazines	Pyrimidines and pyrimidine derivatives	Cytosine	up
416	metab_12624	Phenylpropanoids and polyketides	Isoflavonoids	Isoflavonoid O-glycosides	Daidzin			up
417	metab_2028	Phenylpropanoids and polyketides	Isoflavonoids	Isoflavans	Dalbergioidin	down		up
418	metab_13840	Organoheterocyclic compounds	Azolidines	Imidazolidines	Dantrolene		up	up
419	metab_7312	Organic acids and derivatives	Hydroxy acids and derivatives	Beta hydroxy acids and derivatives	Daucic Acid		up
420	metab_9098	Not Available	Not Available	Not Available	Demethyl Medicarpin		up	up	up
421	metab_1002	Nucleosides, nucleotides, and analogues	Purine nucleosides	Purine 2''-deoxyribonucleosides	Deoxyadenosine		down
422	metab_13863	Nucleosides, nucleotides, and analogues	Purine nucleosides	Purine 2''-deoxyribonucleosides	Deoxyguanosine	up		down
423	metab_13858	Nucleosides, nucleotides, and analogues	Purine nucleosides	Purine 2''-deoxyribonucleosides	Deoxyinosine		down
424	metab_11567	Nucleosides, nucleotides, and analogues	Pyrimidine nucleotides	Pyrimidine nucleotide sugars	Deoxythymidine Diphosphate-L-Rhamnose			down
425	metab_3942	Not Available	Not Available	Not Available	Derrustone			down
426	metab_13438	Lipids and lipid-like molecules	Fatty Acyls	Fatty acids and conjugates	Desthiobiotin				up
427	metab_1591	Lipids and lipid-like molecules	Glycerolipids	Diradylglycerols	Dg(10:0/10:0/0:0)				down
428	metab_11503	Not Available	Not Available	Not Available	Dg(13:0/20:4(7E,9E,11Z,13E)-3Oh(5S,6R,15S)/0:0)			down	down
429	metab_2943	Lipids and lipid-like molecules	Fatty Acyls	Lineolic acids and derivatives	Dg(15:0/18:4(6Z,9Z,12Z,15Z)/0:0)		up	up
430	metab_2924	Lipids and lipid-like molecules	Fatty Acyls	Lineolic acids and derivatives	Dg(16:0/18:3(9Z,12Z,15Z)/0:0)			up
431	metab_3411	Not Available	Not Available	Not Available	Dg(16:0/Pge2/0:0)		up	up
432	metab_3556	Lipids and lipid-like molecules	Glycerolipids	Diradylglycerols	Dg(18:4(6Z,9Z,12Z,15Z)/22:5(7Z,10Z,13Z,16Z,19Z)/0:0)		up	up
433	metab_2879	Not Available	Not Available	Not Available	Dg(20:4(5Z,8Z,11Z,14Z)-Oh(19S)/14:0/0:0)		up	up
434	metab_10009	Not Available	Not Available	Not Available	Dg(20:4(6E,8Z,11Z,13E)-2Oh(5S,15S)/13:0/0:0)			down	down
435	metab_2820	Not Available	Not Available	Not Available	Dg(20:5(7Z,9Z,11E,13E,17Z)-3Oh(5,6,15)/I-16:0/0:0)			up
436	metab_2633	Lipids and lipid-like molecules	Glycerolipids	Diradylglycerols	Dg(22:4(7Z,10Z,13Z,16Z)/18:4(6Z,9Z,12Z,15Z)/0:0)		up	up
437	metab_8209	Not Available	Not Available	Not Available	Dg(5-Iso Pgf2Vi/2:0/0:0)	up		up
438	metab_2881	Lipids and lipid-like molecules	Fatty Acyls	Fatty acids and conjugates	Dg(9D3/9D3/0:0)	up	up	up
439	metab_10018	Not Available	Not Available	Not Available	Dg(A-13:0/0:0/Pge2)		down	down	down
440	metab_11521	Not Available	Not Available	Not Available	Dg(I-13:0/0:0/5-Iso Pgf2Vi)			down	down
441	metab_3442	Not Available	Not Available	Not Available	Dg(I-16:0/20:4(6E,8Z,11Z,13E)-2Oh(5S,15S)/0:0)			up
442	metab_11325	Not Available	Not Available	Not Available	Dg(Pgd1/0:0/I-13:0)			down	down
443	metab_9966	Not Available	Not Available	Not Available	Dg(Pgj2/0:0/I-15:0)			down
444	metab_14522	Not Available	Not Available	Not Available	D-Galactose 1-Phosphate	down
445	metab_12725	Lipids and lipid-like molecules	Fatty Acyls	Eicosanoids	Dhv-Pge2				up
446	metab_4526	Organic oxygen compounds	Organooxygen compounds	Carbohydrates and carbohydrate conjugates	Dide-O-Methyl-4-O-Alpha-D-Glucopyranosylsimmondsin		up	up	up
447	metab_9217	Organoheterocyclic compounds	Pyridines and derivatives	Hydropyridines	Diethyl 2,3,4-Trimethyl-2,3-Dihydropyridine-5,6-Dicarboxylate		up	up	up
448	metab_7251	Organic acids and derivatives	Organic phosphoric acids and derivatives	Phosphate esters	Diethyl Hydrogen Phosphate		up	down	down
449	metab_1441	Lipids and lipid-like molecules	Fatty Acyls	Fatty acids and conjugates	Dihomo-Gamma-Linolenic Acid			up	up
450	metab_5313	Not Available	Not Available	Not Available	Dihydro Tanshinone				down
451	metab_13137	Not Available	Not Available	Not Available	Dihydrobenzoic Acid Pentose			down	down
452	metab_1893	Lipids and lipid-like molecules	Prenol lipids	Monoterpenoids	Dihydrocarvone				up
453	metab_11667	Alkaloids and derivatives	Cytochalasans	Cytochalasins	Dihydrocytochalasin B	down		down	down
454	metab_1749	Lipids and lipid-like molecules	Fatty Acyls	Lineolic acids and derivatives	Dihydrojasmonic Acid	up	up
455	metab_8674	Phenylpropanoids and polyketides	Flavonoids	Flavans	Dihydrokaempferol	down		down	down
456	metab_13371	Alkaloids and derivatives	Morphinans	Not Available	Dihydroneopine	up
457	metab_4354	Lipids and lipid-like molecules	Prenol lipids	Sesquiterpenoids	Dihydrophaseic Acid	down	down	down	down
458	metab_7362	Organoheterocyclic compounds	Azolidines	Oxazolidines	Dimethadione	up			down
459	metab_5720	Organic acids and derivatives	Organic phosphoric acids and derivatives	Phosphate esters	Dimethyl Phosphate				down
460	metab_706	Organosulfur compounds	Sulfoxides	Not Available	Dimethyl Sulfoxide			down
461	metab_1816	Lipids and lipid-like molecules	Fatty Acyls	Fatty acids and conjugates	Dioscoretine	up	up	up
462	metab_11950	Phenylpropanoids and polyketides	Flavonoids	O-methylated flavonoids	Diosmetin		up	up	up
463	metab_761	Not Available	Not Available	Not Available	Dl-4-Hydroxyphenyllactic Acid	up			up
464	metab_6655	Organic acids and derivatives	Carboxylic acids and derivatives	Amino acids, peptides, and analogues	Dl-Arginine	up			up
465	metab_5488	Organic acids and derivatives	Carboxylic acids and derivatives	Amino acids, peptides, and analogues	Dl-Asparagine			up	up
466	metab_14016	Not Available	Not Available	Not Available	Dl-M-Tyrosine			down	down
467	metab_7014	Not Available	Not Available	Not Available	D-Lyxose	up
468	metab_11027	Lipids and lipid-like molecules	Fatty Acyls	Fatty aldehydes	Docosanal			up	up
469	metab_4818	Lipids and lipid-like molecules	Fatty Acyls	Fatty acid esters	Dodec-7-Enedioylcarnitine	up	up	up
470	metab_9517	Lipids and lipid-like molecules	Fatty Acyls	Fatty acids and conjugates	Dodecanedioic Acid		up
471	metab_8019	Organic acids and derivatives	Carboxylic acids and derivatives	Amino acids, peptides, and analogues	Dopaxanthin			up	up
472	metab_14102	Organoheterocyclic compounds	Imidazopyrimidines	Purines and purine derivatives	Dyphylline			up	up
473	metab_5395	Alkaloids and derivatives	Tropane alkaloids	Not Available	Ecgonine	down		down
474	metab_5356	Benzenoids	Phenol ethers	Anisoles	Edotecarin			up	up
475	metab_1663	Organic oxygen compounds	Organooxygen compounds	Carbonyl compounds	Embelin	down		down	down
476	metab_12666	Benzenoids	Anthracenes	Anthraquinones	Emodin 8-Glucoside		up
477	metab_8166	Not Available	Not Available	Not Available	Ensulizole		up
478	metab_11495	Lipids and lipid-like molecules	Prenol lipids	Diterpenoids	Ent-17-Oxo-15-Kauren-19-Oic Acid			down	down
479	metab_5358	Phenylpropanoids and polyketides	Flavonoids	Flavans	Epigallocatechin			up	up
480	metab_12291	Phenylpropanoids and polyketides	Flavonoids	Flavans	Epigallocatechin Gallate		down
481	metab_9750	Phenylpropanoids and polyketides	Macrolides and analogues	Epothilones and analogues	Epothilone D				down
482	metab_9478	Lipids and lipid-like molecules	Prenol lipids	Sesquiterpenoids	Eremopetasidione			down	down
483	metab_11596	Alkaloids and derivatives	Ergoline and derivatives	Lysergic acids and derivatives	Ergocornine	down	down	down	down
484	metab_12495	Phenylpropanoids and polyketides	Flavonoids	Flavans	Eriodictyol	up	up	up	up
485	metab_2893	Not Available	Not Available	Not Available	Erucamide	up
486	metab_1619	Benzenoids	Phenol ethers	Not Available	Esmolol	up	up	up	up
487	metab_2201	Lipids and lipid-like molecules	Steroids and steroid derivatives	Estrane steroids	Estriol				down
488	metab_4478	Lipids and lipid-like molecules	Steroids and steroid derivatives	Steroidal glycosides	Estriol 3-Sulfate 16-Glucuronide		up	up	up
489	metab_14317	Organic oxygen compounds	Organooxygen compounds	Carbohydrates and carbohydrate conjugates	Ethyl Glucuronide	up	up	up	up
490	metab_4738	Phenylpropanoids and polyketides	Macrolides and analogues	Not Available	Ethylene Brassylate			down	down
491	metab_4712	Organoheterocyclic compounds	Diazines	Pyrazines	Ethylisopropylamiloride		up	up	up
492	metab_2010	Phenylpropanoids and polyketides	Flavonoids	O-methylated flavonoids	Eupatorin			down
493	metab_1803	Not Available	Not Available	Not Available	Everninic Acid	up	up
494	metab_11658	Not Available	Not Available	Not Available	Fa(18:5+2O)				down
495	metab_11745	Lipids and lipid-like molecules	Fatty Acyls	Fatty alcohols	Falcarindiol				down
496	metab_2700	Not Available	Not Available	Not Available	Farnesyl Acetone		down
497	metab_13340	Lipids and lipid-like molecules	Prenol lipids	Sesquiterpenoids	Farnesylcysteine	up
498	metab_12138	Benzenoids	Benzene and substituted derivatives	Diphenylethers	Fenoprofen		up	up	up
499	metab_7455	Organoheterocyclic compounds	Triazines	1,2,4-triazines	Ferene Triazine			up	up
500	metab_12819	Not Available	Not Available	Not Available	Flavanomarein		up
501	metab_9872	Benzenoids	Fluorenes	Not Available	Fluorenylmethyl Chloroformate	up	up	up	up
502	metab_2736	Phenylpropanoids and polyketides	Isoflavonoids	O-methylated isoflavonoids	Formononetin		up	up	up
503	metab_2622	Not Available	Not Available	Not Available	Formononetin 7-O-Glucoside-6''-O-Malonate		up	up	up
504	metab_1863	Not Available	Not Available	Not Available	Formononetin-7-O-Glucoside		up	up	up
505	metab_11385	Lipids and lipid-like molecules	Prenol lipids	Triterpenoids	Forskolin			down	down
506	metab_13906	Organic oxygen compounds	Organooxygen compounds	Carbohydrates and carbohydrate conjugates	Fructose Lactate	down	down
507	metab_4996	Organic acids and derivatives	Carboxylic acids and derivatives	Amino acids, peptides, and analogues	Fructosyl-Lysine		up	up	up
508	metab_7809	Organic oxygen compounds	Organooxygen compounds	Carbohydrates and carbohydrate conjugates	Furaneol 4-(6-Malonylglucoside)	up
509	metab_553	Organic oxygen compounds	Organooxygen compounds	Carbonyl compounds	Furfural			up
510	metab_1588	Not Available	Not Available	Not Available	Fustin		up
511	metab_14481	Organic oxygen compounds	Organooxygen compounds	Carbohydrates and carbohydrate conjugates	Galactaric Acid				up
512	metab_14080	Lipids and lipid-like molecules	Steroids and steroid derivatives	Hydroxysteroids	Galactinol	up	up	up	up
513	metab_11101	Lipids and lipid-like molecules	Sphingolipids	Glycosphingolipids	Galactosylceramide (D18:1/14:0)		down	down	down
514	metab_11293	Not Available	Not Available	Not Available	Gamma-13(S)-Hpotre			down	down
515	metab_803	Organic acids and derivatives	Carboxylic acids and derivatives	Amino acids, peptides, and analogues	Gamma-Glutamyl-Beta-(Isoxazolin-5-On-2-Yl)Alanine				down
516	metab_7403	Organic acids and derivatives	Carboxylic acids and derivatives	Amino acids, peptides, and analogues	Gamma-Glutamyl-Beta-Cyanoalanine	up
517	metab_7024	Organic acids and derivatives	Carboxylic acids and derivatives	Amino acids, peptides, and analogues	Gamma-Glutamylglutamic Acid			down	down
518	metab_13951	Organic acids and derivatives	Carboxylic acids and derivatives	Amino acids, peptides, and analogues	Gamma-Glutamylmethionine				down
519	metab_4834	Organic acids and derivatives	Carboxylic acids and derivatives	Amino acids, peptides, and analogues	Gamma-Glutamylphenylalanine		up
520	metab_14105	Organic acids and derivatives	Carboxylic acids and derivatives	Amino acids, peptides, and analogues	Gamma-Glutamylthreonine			up	up
521	metab_4363	Not Available	Not Available	Not Available	Gdc-0879			down	down
522	metab_13912	Nucleosides, nucleotides, and analogues	Purine nucleotides	Purine nucleotide sugars	Gdp-D-Rhamnose	down
523	metab_1587	Phenylpropanoids and polyketides	Isoflavonoids	Isoflav-2-enes	Genistein		up
524	metab_9683	Lipids and lipid-like molecules	Prenol lipids	Monoterpenoids	Geranic Acid			down
525	metab_1120	Organic acids and derivatives	Carboxylic acids and derivatives	Amino acids, peptides, and analogues	G-Glu-Val		up
526	metab_1838	Lipids and lipid-like molecules	Prenol lipids	Diterpenoids	Gibberellin A120				up
527	metab_7721	Benzenoids	Benzene and substituted derivatives	Benzoic acids and derivatives	Ginnalin B				up
528	metab_2788	Lipids and lipid-like molecules	Prenol lipids	Triterpenoids	Ginsenoside C-K			up
529	metab_3393	Lipids and lipid-like molecules	Fatty Acyls	Fatty alcohols	Glabranin				down
530	metab_4315	Not Available	Not Available	Not Available	Gliocladic Acid				down
531	metab_5005	Not Available	Not Available	Not Available	Gln Asp Leu	up
532	metab_4990	Not Available	Not Available	Not Available	Gln Glu Ile	up
533	metab_1442	Not Available	Not Available	Not Available	Gln Val Leu	up
534	metab_4537	Not Available	Not Available	Not Available	Glu Cys Ala				up
535	metab_5621	Not Available	Not Available	Not Available	Glu Glu				down
536	metab_1214	Not Available	Not Available	Not Available	Glu Leu				down
537	metab_4863	Not Available	Not Available	Not Available	Glu Trp				down
538	metab_1060	Not Available	Not Available	Not Available	Glu Tyr				down
539	metab_6862	Organic oxygen compounds	Organooxygen compounds	Carbohydrates and carbohydrate conjugates	Gluconolactone				down
540	metab_8704	Organic acids and derivatives	Carboxylic acids and derivatives	Amino acids, peptides, and analogues	Glutamine Lactate	up
541	metab_7666	Organic acids and derivatives	Carboxylic acids and derivatives	Amino acids, peptides, and analogues	Glutamylisoleucine				down
542	metab_13180	Organic acids and derivatives	Carboxylic acids and derivatives	Amino acids, peptides, and analogues	Glutamyltryptophan				down
543	metab_7512	Organic acids and derivatives	Carboxylic acids and derivatives	Amino acids, peptides, and analogues	Glutamyltyrosine			down	down
544	metab_1155	Not Available	Not Available	Not Available	Gly Ile Glu				up
545	metab_5347	Not Available	Not Available	Not Available	Gly Leu Glu				up
546	metab_8901	Not Available	Not Available	Not Available	Gly Leu Phe	up
547	metab_13337	Not Available	Not Available	Not Available	Gly Val Ala Asp Val	up
548	metab_1566	Not Available	Not Available	Not Available	Gly Val Phe	up
549	metab_6844	Lipids and lipid-like molecules	Glycerophospholipids	Glycerophosphates	Glycerol 3-Phosphate	down
550	metab_6860	Lipids and lipid-like molecules	Glycerophospholipids	Glycerophosphoinositols	Glycerophosphoinositol	down		down
551	metab_662	Organic acids and derivatives	Carboxylic acids and derivatives	Amino acids, peptides, and analogues	Glycine, L-G-Glutamyl-L-Cysteinyl-, 3-Methyl Ester			up	up
552	metab_4077	Phenylpropanoids and polyketides	Isoflavonoids	Isoflav-2-enes	Glycitein		up	up	up
553	metab_910	Phenylpropanoids and polyketides	Isoflavonoids	Hydroxyisoflavonoids	Glycycoumarin		up	up	up
554	metab_5637	Organic acids and derivatives	Carboxylic acids and derivatives	Amino acids, peptides, and analogues	Glycylproline				up
555	metab_9895	Not Available	Not Available	Not Available	Grandifloric Acid			down	down
556	metab_13971	Not Available	Not Available	Not Available	Guanidylic Acid (Guanosine Monophosphate)				down
557	metab_7462	Nucleosides, nucleotides, and analogues	Purine nucleosides	Not Available	Guanosine			down	down
558	metab_5237	Lipids and lipid-like molecules	Sphingolipids	Glycosphingolipids	Guanosine 2',3'-Cyclic Phosphate				down
559	metab_14530	Organic acids and derivatives	Hydroxy acids and derivatives	Medium-chain hydroxy acids and derivatives	Gulonic Acid				up
560	metab_12168	Not Available	Not Available	Not Available	Haematoxylin		up	up	up
561	metab_13131	Alkaloids and derivatives	Harmala alkaloids	Not Available	Harmine		up
562	metab_11872	Lipids and lipid-like molecules	Prenol lipids	Terpene lactones	Helenalin			down	down
563	metab_1565	Not Available	Not Available	Not Available	Hemado			up
564	metab_4029	Benzenoids	Indanes	Not Available	Hematein		up	up	up
565	metab_4222	Not Available	Not Available	Not Available	Heptadecasphinganine				down
566	metab_10232	Organic oxygen compounds	Organooxygen compounds	Ethers	Heptaethylene Glycol Monododecyl Ether		down	down	down
567	metab_4401	Phenylpropanoids and polyketides	Macrolactams	Not Available	Herbimycin A				up
568	metab_1240	Not Available	Not Available	Not Available	His Val Ile	up
569	metab_9469	Not Available	Not Available	Not Available	Histamine-Trifluoromethyltoluide		down	down	down
570	metab_7026	Organic acids and derivatives	Carboxylic acids and derivatives	Amino acids, peptides, and analogues	Histidine Glutamate			up	up
571	metab_1376	Organic acids and derivatives	Carboxylic acids and derivatives	Amino acids, peptides, and analogues	Histidylprolineamide		up
572	metab_2238	Lipids and lipid-like molecules	Prenol lipids	Triterpenoids	Hoduloside Iv		down
573	metab_1161	Organic acids and derivatives	Carboxylic acids and derivatives	Amino acids, peptides, and analogues	Homomethionine	up		down
574	metab_10061	Benzenoids	Anthracenes	Anthraquinones	Hydroxyanthraquinone		up	up	up
575	metab_1819	Organic acids and derivatives	Carboxylic acids and derivatives	Amino acids, peptides, and analogues	Hypoglycin B				down
576	metab_11131	Not Available	Not Available	Not Available	Iaa-94			down	down
577	metab_13014	Not Available	Not Available	Not Available	Icariside F2	up
578	metab_4304	Not Available	Not Available	Not Available	Ici-162,846				down
579	metab_4639	Organic acids and derivatives	Carboxylic acids and derivatives	Amino acids, peptides, and analogues	Ile-Trp				down
580	metab_1680	Organic nitrogen compounds	Organonitrogen compounds	Guanidines	Imidacloprid			down	down
581	metab_13298	Organoheterocyclic compounds	Lactams	Beta lactams	Imipenem			up	up
582	metab_14042	Benzenoids	Benzene and substituted derivatives	Sulfanilides	Indisulam				down
583	metab_1458	Organoheterocyclic compounds	Indoles and derivatives	Indoles	Indole-3-Butyric Acid		up
584	metab_4835	Organic nitrogen compounds	Organonitrogen compounds	Quinonimines	Indophenol		up
585	metab_11923	Nucleosides, nucleotides, and analogues	Purine nucleosides	Not Available	Inosine	up		up
586	metab_9345	Organoheterocyclic compounds	Tetrapyrroles and derivatives	Porphyrins	Inosine 2',3'-Cyclic Phosphate		down	down	down
587	metab_13385	Phenylpropanoids and polyketides	Macrolides and analogues	Not Available	Integerrimine	up
588	metab_1497	Alkaloids and derivatives	Tropane alkaloids	Not Available	Ipratropium Bromide				down
589	metab_435	Organic oxygen compounds	Organooxygen compounds	Carbohydrates and carbohydrate conjugates	Isatoribine			down
590	metab_5462	Not Available	Not Available	Not Available	Isocytosine	up
591	metab_1791	Not Available	Not Available	Not Available	Isoflavone Base+1O,1Meo,O-Hex+C7H12No		up	up	up
592	metab_5272	Not Available	Not Available	Not Available	Isoguanosine				down
593	metab_4173	Phenylpropanoids and polyketides	Coumarins and derivatives	Furanocoumarins	Isoimperatorin		up	up	up
594	metab_10492	Phenylpropanoids and polyketides	Flavonoids	O-methylated flavonoids	Isokaempferide		up	up	up
595	metab_1412	Organoheterocyclic compounds	Azolidines	Thiazolidines	Isoleucyl-Thiazolidine		up
596	metab_9612	Phenylpropanoids and polyketides	Linear 1,3-diarylpropanoids	Chalcones and dihydrochalcones	Isoliquiritigenin	up	up	up	up
597	metab_1504	Lipids and lipid-like molecules	Prenol lipids	Terpene glycosides	Isopetasoside		up	up	up
598	metab_2693	Organic oxygen compounds	Organooxygen compounds	Carbonyl compounds	Isophorone		down
599	metab_9522	Phenylpropanoids and polyketides	Flavonoids	Flavones	Isorhamnetin			up
600	metab_9499	Phenylpropanoids and polyketides	Flavonoids	O-methylated flavonoids	Isosakuranetin		up	up	up
601	metab_11972	Not Available	Not Available	Not Available	Isosulochrin	up	up	up	up
602	metab_2074	Not Available	Not Available	Not Available	Isotectorigenin, 7-Methyl Ether	up
603	metab_1300	Organoheterocyclic compounds	Imidazopyrimidines	Purines and purine derivatives	Istradefylline			up
604	metab_7373	Lipids and lipid-like molecules	Fatty Acyls	Fatty acids and conjugates	Itaconic Acid	down	down	down
605	metab_4405	Not Available	Not Available	Not Available	Izalpinin	down	down
606	metab_12057	Not Available	Not Available	Not Available	Jaceosidin				down
607	metab_4779	Organic oxygen compounds	Organooxygen compounds	Carbohydrates and carbohydrate conjugates	Jasmolone Glucoside		up
608	metab_9455	Not Available	Not Available	Not Available	Juniperoside Iii		down	down	down
609	metab_9121	Phenylpropanoids and polyketides	Flavonoids	Flavones	Kaempferol	up	up	up	up
610	metab_2133	Not Available	Not Available	Not Available	Kaempferol 3,7,4'-Trimethyl Ether			down	down
611	metab_1946	Not Available	Not Available	Not Available	Karakoline	up
612	metab_8247	Organic acids and derivatives	Keto acids and derivatives	Short-chain keto acids and derivatives	Ketoleucine		down
613	metab_5080	Organoheterocyclic compounds	Indoles and derivatives	Pyridoindoles	L-1,2,3,4-Tetrahydro-Beta-Carboline-3-Carboxylic Acid			down
614	metab_7846	Benzenoids	Benzene and substituted derivatives	Benzoic acids and derivatives	Labetalol	up
615	metab_11695	Not Available	Not Available	Not Available	Lactarorufin A				down
616	metab_14387	Organic oxygen compounds	Organooxygen compounds	Carbohydrates and carbohydrate conjugates	Lactulose	up	up	up	up
617	metab_5764	Organic acids and derivatives	Carboxylic acids and derivatives	Amino acids, peptides, and analogues	L-Alpha-Amino-5-Oxo-2(5H)-Isoxazolepropanoic Acid		up	up
618	metab_426	Organic acids and derivatives	Carboxylic acids and derivatives	Amino acids, peptides, and analogues	L-Argininium(1+)				up
619	metab_7265	Lipids and lipid-like molecules	Fatty Acyls	Fatty acyl glycosides	L-Ascorbic Acid 2-Glucoside		up	up	up
620	metab_5821	Organic acids and derivatives	Carboxylic acids and derivatives	Amino acids, peptides, and analogues	L-Asparagine		up	up	up
621	metab_12809	Phenylpropanoids and polyketides	Macrolides and analogues	Not Available	Latrunculin A		up	up
622	metab_13122	Organoheterocyclic compounds	Piperidines	Benzylpiperidines	Lavoltidine	up			down
623	metab_1671	Organic acids and derivatives	Carboxylic acids and derivatives	Amino acids, peptides, and analogues	L-Cysteine				up
624	metab_13860	Benzenoids	Benzene and substituted derivatives	Benzoic acids and derivatives	Leonurine				down
625	metab_5174	Not Available	Not Available	Not Available	Leu Ala Glu	up		up	up
626	metab_1031	Not Available	Not Available	Not Available	Leu Glu Ser	up
627	metab_1427	Not Available	Not Available	Not Available	Leu Gly Val	up
628	metab_7923	Organoheterocyclic compounds	Indoles and derivatives	Indolecarboxylic acids and derivatives	Leucodopachrome				up
629	metab_13188	Phenylpropanoids and polyketides	Flavonoids	Flavonoid glycosides	Leucopelargonidin 3-O-Alpha-L-Rhamno-Beta-D-Glucopyranoside				up
630	metab_7389	Organic acids and derivatives	Carboxylic acids and derivatives	Amino acids, peptides, and analogues	Leucyl-Threonine			down	down
631	metab_5740	Organoheterocyclic compounds	Oxepanes	Not Available	Levoglucosan			up
632	metab_5238	Benzenoids	Benzene and substituted derivatives	Phenylpropanes	Levonordefrin				down
633	metab_13543	Lipids and lipid-like molecules	Saccharolipids	Not Available	Licoagroside B			down
634	metab_4396	Organoheterocyclic compounds	Isobenzofurans	Not Available	Ligustilide	up	up	up	up
635	metab_3609	Organoheterocyclic compounds	Oxepanes	Not Available	Limonene Oxide		down
636	metab_13989	Organoheterocyclic compounds	Dithiolanes	Lipoamides	Lipoamide		up	up	up
637	metab_2494	Lipids and lipid-like molecules	Fatty Acyls	Eicosanoids	Lipoxin A4			up	up
638	metab_9359	Phenylpropanoids and polyketides	Flavonoids	Flavans	Liquiritigenin	up	up	up	up
639	metab_9252	Phenylpropanoids and polyketides	Flavonoids	Flavonoid glycosides	Liquiritin		up	up	up
640	metab_1361	Organic acids and derivatives	Carboxylic acids and derivatives	Amino acids, peptides, and analogues	Lisinopril	up	up
641	metab_9431	Organoheterocyclic compounds	Benzofurans	Not Available	Loliolide	up
642	metab_281	Organic acids and derivatives	Carboxylic acids and derivatives	Amino acids, peptides, and analogues	L-Ornithine			up	up
643	metab_11389	Lipids and lipid-like molecules	Glycerophospholipids	Glycerophosphocholines	Lpc(18:1)			down
644	metab_9953	Lipids and lipid-like molecules	Glycerophospholipids	Glycerophosphoethanolamines	Lpe(16:0)		down		down
645	metab_11399	Lipids and lipid-like molecules	Glycerophospholipids	Glycerophosphoethanolamines	Lpe(18:1)		down	down	down
646	metab_579	Organic acids and derivatives	Carboxylic acids and derivatives	Amino acids, peptides, and analogues	L-Proline				up
647	metab_1395	Organic acids and derivatives	Carboxylic acids and derivatives	Amino acids, peptides, and analogues	L-Pyridosine			up	up
648	metab_785	Organic acids and derivatives	Carboxylic acids and derivatives	Amino acids, peptides, and analogues	L-Threonine				up
649	metab_1833	Organoheterocyclic compounds	Pteridines and derivatives	Alloxazines and isoalloxazines	Lumichrome	up	up	up	up
650	metab_1486	Alkaloids and derivatives	Lupin alkaloids	Lupinine-type alkaloids	Lupinic Acid			down	down
651	metab_9066	Phenylpropanoids and polyketides	Flavonoids	Flavonoid glycosides	Luteolin 3'-(3''-Acetylglucuronide)		down
652	metab_4238	Not Available	Not Available	Not Available	Lychnopholic Acid				down
653	metab_1456	Alkaloids and derivatives	Not Available	Not Available	Lycopsamine		up	up
654	metab_4255	Not Available	Not Available	Not Available	Lys His Lys		down	down	down
655	metab_8677	Lipids and lipid-like molecules	Glycerophospholipids	Glycerophosphates	Lysopa(P-16:0/0:0)	up
656	metab_3726	Lipids and lipid-like molecules	Glycerophospholipids	Glycerophosphocholines	Lysopc(20:5(5Z,8Z,11Z,14Z,17Z)/0:0)			down	down
657	metab_10475	Lipids and lipid-like molecules	Glycerophospholipids	Glycerophosphoethanolamines	Lysope(0:0/18:3(9Z,12Z,15Z))		down
658	metab_10860	Lipids and lipid-like molecules	Glycerophospholipids	Glycerophosphoethanolamines	Lysope(18:4(6Z,9Z,12Z,15Z)/0:0)		down		down
659	metab_13567	Organic acids and derivatives	Carboxylic acids and derivatives	Amino acids, peptides, and analogues	Lysylhydroxyproline	up
660	metab_9101	Not Available	Not Available	Not Available	Maesopsin		up	up	up
661	metab_6728	Lipids and lipid-like molecules	Fatty Acyls	Fatty acids and conjugates	Maleamic Acid	up		up	up
662	metab_14236	Organic acids and derivatives	Carboxylic acids and derivatives	Dicarboxylic acids and derivatives	Malonic Acid		up		up
663	metab_5823	Organic oxygen compounds	Organooxygen compounds	Carbonyl compounds	Malonic Semialdehyde		up
664	metab_1738	Benzenoids	Benzene and substituted derivatives	Phenylpropanes	Malonoben				down
665	metab_4323	Phenylpropanoids and polyketides	Flavonoids	Flavonoid glycosides	Malonylglycitin		up	up	up
666	metab_11994	Organoheterocyclic compounds	Naphthofurans	Not Available	Marasmal	down	down	down	down
667	metab_2359	Phenylpropanoids and polyketides	Coumarins and derivatives	Pyranocoumarins	Marshdimerin				down
668	metab_1921	Phenylpropanoids and polyketides	Isoflavonoids	Furanoisoflavonoids	Medicarpin	up		up
669	metab_4334	Phenylpropanoids and polyketides	Isoflavonoids	Furanoisoflavonoids	Medicarpin 3-O-(6'-Malonylglucoside)	up	up	up	up
670	metab_4214	Not Available	Not Available	Not Available	Meprylcaine	down	down	down
671	metab_8057	Organic acids and derivatives	Carboxylic acids and derivatives	Amino acids, peptides, and analogues	Methionine Glutamate			down
672	metab_9046	Organoheterocyclic compounds	Diazines	Pyrimidines and pyrimidine derivatives	Methohexital			down	down
673	metab_9124	Not Available	Not Available	Not Available	Methyl 2-(2,6-Dihydroxy-4-Methylbenzoyl)-3,5-Dihydroxybenzoate		up	up	up
674	metab_13496	Benzenoids	Benzene and substituted derivatives	Benzoic acids and derivatives	Methyl 3-Benzoyloxy-8-(3-Hydroxypropyl)-8-Azabicyclo[3.2.1]Octane-2-Carboxylate	up
675	metab_12047	Organic acids and derivatives	Keto acids and derivatives	Beta-keto acids and derivatives	Methyl Acetoacetate		down	down	up
676	metab_5421	Benzenoids	Benzene and substituted derivatives	Phenethylamines	Methyldopate	up
677	metab_8311	Organoheterocyclic compounds	Tetrahydroisoquinolines	Not Available	Methylsulfonyl 4-[(2-Carbamimidoyl-3,4-Dihydro-1H-Isoquinolin-7-Yl)Oxymethyl]-1-Pyridin-4-Ylpiperidine-4-Carboxylate			down
678	metab_6939	Organoheterocyclic compounds	Thiochromanes	Not Available	Meticrane				up
679	metab_13554	Benzenoids	Phenols	Tyrosols and derivatives	Metoprolol	up
680	metab_4218	Lipids and lipid-like molecules	Fatty Acyls	Eicosanoids	Mg(0:0/Pge2/0:0)	up	up	up	up
681	metab_3840	Not Available	Not Available	Not Available	Mg(20:5(5Z,8Z,11Z,14Z,16E)-Oh(18)/0:0/0:0)		up	up	up
682	metab_11770	Lipids and lipid-like molecules	Prenol lipids	Terpene glycosides	Monoglucuronylglycyrrhetinic Acid			up
683	metab_3430	Lipids and lipid-like molecules	Fatty Acyls	Fatty alcohols	Mosinone A		up	up
684	metab_1843	Lipids and lipid-like molecules	Prenol lipids	Diterpenoids	Musabalbisiane A	up	up	up
685	metab_5221	Not Available	Not Available	Not Available	N-([1,2,4]Triazolo[4,3-A]Pyridin-8-Yl)Pyridine-2-Carboxamide			up
686	metab_14394	Organic oxygen compounds	Organooxygen compounds	Carbohydrates and carbohydrate conjugates	N-(1-Deoxy-1-Fructosyl)Glycine			up	up
687	metab_1254	Organic oxygen compounds	Organooxygen compounds	Alcohols and polyols	N-(1-Deoxy-1-Fructosyl)Isoleucine		up	up	up
688	metab_13752	Organic acids and derivatives	Carboxylic acids and derivatives	Amino acids, peptides, and analogues	N(2)-Phenylacetyl-L-Glutaminate	up	up	up	up
689	metab_7498	Not Available	Not Available	Not Available	N-(2,5-Dioxocyclopentyl)Acetamide	up
690	metab_1924	Not Available	Not Available	Not Available	N-(4-Bromo-2-Methoxyphenyl)-1-(3-Methoxyquinoxalin-2-Yl)Piperidine-3-Carboxamide	up
691	metab_5129	Not Available	Not Available	Not Available	N-(4-Fluoro-3-Methylphenyl)-2,4-Dimethyl-1,3-Thiazole-5-Carboxamide	up	down	down	down
692	metab_4693	Nucleosides, nucleotides, and analogues	Purine nucleosides	Not Available	N-(8-Amino-1-Carboxyoctyl)-Alanyl-Proline			up
693	metab_13563	Not Available	Not Available	Not Available	N,N-Dimethylguanosine	up
694	metab_4420	Homogeneous non-metal compounds	Homogeneous halogens	Not Available	N-[(3A,5B,7A)-3-Hydroxy-24-Oxo-7-(Sulfooxy)Cholan-24-Yl]-Glycine				up
695	metab_12974	Organic acids and derivatives	Carboxylic acids and derivatives	Amino acids, peptides, and analogues	N-[(Ethoxycarbonyl)Methyl)-P-Menthane-3-Carboxamide				down
696	metab_1234	Nucleosides, nucleotides, and analogues	Purine nucleosides	Not Available	N2,N2-Dimethylguanosine	up	up
697	metab_4727	Not Available	Not Available	Not Available	N-3-Oxo-Tetradec-7(Z)-Enoyl-L-Homoserine Lactone	up	up
698	metab_4888	Nucleosides, nucleotides, and analogues	Purine nucleosides	Not Available	N6-Carbamoyl-L-Threonyladenosine				up
699	metab_654	Nucleosides, nucleotides, and analogues	Purine nucleosides	Not Available	N6-Methyladenosine			up	up
700	metab_1752	Organic oxygen compounds	Organooxygen compounds	Carbohydrates and carbohydrate conjugates	N-Acetyl-7-O-Acetylneuraminic Acid			up	up
701	metab_14322	Organic acids and derivatives	Carboxylic acids and derivatives	Amino acids, peptides, and analogues	N-Acetyl-L-Aspartic Acid			up	up
702	metab_12477	Organic acids and derivatives	Carboxylic acids and derivatives	Amino acids, peptides, and analogues	N-Acetyl-L-Tryptophan		up
703	metab_1105	Organic oxygen compounds	Organooxygen compounds	Carbohydrates and carbohydrate conjugates	N-Acetylmuramate			up
704	metab_5482	Organic acids and derivatives	Carboxylic acids and derivatives	Amino acids, peptides, and analogues	N-Acetyl-S-(N-Methylcarbamoyl)Cysteine				up
705	metab_5607	Phenylpropanoids and polyketides	Flavonoids	Flavonoid glycosides	Naringenin 5-Rhamnoside				up
706	metab_12315	Not Available	Not Available	Not Available	Naringenin-7-O-Beta-D-Glucuronide			up	up
707	metab_5762	Organic acids and derivatives	Carboxylic acids and derivatives	Amino acids, peptides, and analogues	N-Carbamylglutamate		up
708	metab_4045	Not Available	Not Available	Not Available	N-Cyclopentyl-1-[6-(4-Methylphenyl)Pyridazin-3-Yl]Piperidine-3-Carboxamide				up
709	metab_4650	Not Available	Not Available	Not Available	N-Dodecanoyl-Dl-Homoserine Lactone		up
710	metab_4847	Not Available	Not Available	Not Available	N-Eicosapentaenoyl Cysteine		up
711	metab_9527	Phenylpropanoids and polyketides	Flavonoids	Flavonoid glycosides	Neocarthamin		up		up
712	metab_12067	Phenylpropanoids and polyketides	Flavonoids	Flavonoid glycosides	Neolicuroside		up
713	metab_8873	Phenylpropanoids and polyketides	Flavonoids	Flavonoid glycosides	Neoliquiritin		up	up	up
714	metab_4973	Benzenoids	Tetralins	Not Available	Nepicastat				up
715	metab_14116	Organic acids and derivatives	Carboxylic acids and derivatives	Amino acids, peptides, and analogues	N-Formyl-L-Glutamic Acid	up	up	up	up
716	metab_10271	Lignans, neolignans and related compounds	Dibenzylbutane lignans	Not Available	Niranthin			down	down
717	metab_6890	Organic acids and derivatives	Carboxylic acids and derivatives	Amino acids, peptides, and analogues	Nitrilotriacetic Acid			up	up
718	metab_1517	Organic acids and derivatives	Carboxylic acids and derivatives	Amino acids, peptides, and analogues	N-Lauroyl Threonine		up
719	metab_4543	Organic acids and derivatives	Carboxylic acids and derivatives	Amino acids, peptides, and analogues	N-Malonyltryptophan		up
720	metab_9619	Organic oxygen compounds	Organooxygen compounds	Alcohols and polyols	N-Methylsphingosine			down	down
721	metab_4930	Not Available	Not Available	Not Available	N-Octanoyl-Dl-Homoserine Lactone	up	up	up	up
722	metab_4802	Organic acids and derivatives	Carboxylic acids and derivatives	Amino acids, peptides, and analogues	N-Octanoyl-L-Homoserine Lactone		up	up	up
723	metab_4591	Organic acids and derivatives	Carboxylic acids and derivatives	Amino acids, peptides, and analogues	N-Omega-Propyl-L-Arginine	up	up
724	metab_4610	Lipids and lipid-like molecules	Fatty Acyls	Fatty acid esters	Nona-3,5,7-Trienoylcarnitine	up	up	up	up
725	metab_4492	Lipids and lipid-like molecules	Fatty Acyls	Fatty acid esters	Nonanedioylcarnitine	up	up	up	up
726	metab_8984	Phenylpropanoids and polyketides	Flavonoids	Flavans	Norartocarpanone	up	up	up	up
727	metab_11302	Phenylpropanoids and polyketides	Flavonoids	Flavones	Norizalpinin	down		up
728	metab_8228	Benzenoids	Phenols	Methoxyphenols	Normetanephrine		up
729	metab_11505	Organic oxygen compounds	Organooxygen compounds	Carbohydrates and carbohydrate conjugates	Ntp	up		down
730	metab_1761	Organic acids and derivatives	Carboxylic acids and derivatives	Amino acids, peptides, and analogues	N-Undecanoylglycine	up	up	up
731	metab_3844	Organoheterocyclic compounds	Tetrahydrofurans	Not Available	Obtusilactone A				up
732	metab_1705	Lipids and lipid-like molecules	Fatty Acyls	Fatty aldehydes	Octadec-9-Enal	up	up
733	metab_2848	Lipids and lipid-like molecules	Fatty Acyls	Fatty alcohols	Octadecanol	down
734	metab_9285	Lipids and lipid-like molecules	Fatty Acyls	Fatty acids and conjugates	Octanoic Acid	up	up		up
735	metab_1698	Benzenoids	Phenols	Tyrosols and derivatives	O-Demethylmetoprolol	up	up
736	metab_8359	Not Available	Not Available	Not Available	Okanin-4'-O-Glucoside			down	down
737	metab_10960	Not Available	Not Available	Not Available	Oleoyl-L-Alpha-Lysophosphatidic Acid			down	down
738	metab_10042	Not Available	Not Available	Not Available	Oroxylin A			up	up
739	metab_1876	Lipids and lipid-like molecules	Prenol lipids	Diterpenoids	Oryzalexin A			down
740	metab_14008	Organic acids and derivatives	Carboxylic acids and derivatives	Amino acids, peptides, and analogues	O-Succinyl-L-Homoserine	up		down	down
741	metab_1552	Organic oxygen compounds	Organooxygen compounds	Alcohols and polyols	Ovalicin	up	up
742	metab_559	Organic acids and derivatives	Carboxylic acids and derivatives	Amino acids, peptides, and analogues	Oxaceprol				up
743	metab_12177	Organic acids and derivatives	Carboxylic acids and derivatives	Dicarboxylic acids and derivatives	Oxalic Acid			down
744	metab_7359	Organic acids and derivatives	Carboxylic acids and derivatives	Amino acids, peptides, and analogues	Oxidized Glutathione			up	up
745	metab_5765	Organic acids and derivatives	Carboxylic acids and derivatives	Amino acids, peptides, and analogues	Oxiracetam		up	up	up
746	metab_4339	Not Available	Not Available	Not Available	Oxonol	up	up	up	up
747	metab_4321	Organic oxygen compounds	Organooxygen compounds	Carbonyl compounds	Oxyglutinosone				down
748	metab_3829	Lipids and lipid-like molecules	Steroids and steroid derivatives	Androstane steroids	Oxymesterone			down	down
749	metab_898	Organoheterocyclic compounds	Imidazopyrimidines	Purines and purine derivatives	Oxypurinol	down
750	metab_2874	Not Available	Not Available	Not Available	Pa(16:1(9Z)/18:1(12Z)-2Oh(9,10))	down
751	metab_10449	Not Available	Not Available	Not Available	Pa(18:1(12Z)-2Oh(9,10)/18:3(6Z,9Z,12Z))			up
752	metab_2876	Not Available	Not Available	Not Available	Pa(20:3(6,8,11)-Oh(5)/P-16:0)			up
753	metab_8190	Lipids and lipid-like molecules	Prenol lipids	Terpene glycosides	Paeoniflorin	down	down	down	down
754	metab_11838	Lipids and lipid-like molecules	Fatty Acyls	Fatty alcohols	Panaxynol				down
755	metab_8617	Lipids and lipid-like molecules	Fatty Acyls	Fatty acyl glycosides	Pantoyllactone Glucoside		up	up	up
756	metab_8649	Organoheterocyclic compounds	Pyrans	Not Available	Patulin		down
757	metab_2434	Lipids and lipid-like molecules	Glycerophospholipids	Glycerophosphocholines	Pc(18:3/0:0)				down
758	metab_8175	Organoheterocyclic compounds	Naphthopyrans	Not Available	Pc-M6				down
759	metab_11714	Phenylpropanoids and polyketides	Cinnamic acids and derivatives	Hydroxycinnamic acids and derivatives	P-Coumaroyltriacetic Acid Lactone		up	up	up
760	metab_12842	Organic oxygen compounds	Organooxygen compounds	Carbohydrates and carbohydrate conjugates	P-Cresol Glucuronide			up	up
761	metab_9906	Not Available	Not Available	Not Available	Pe(16:1/0:0)				up
762	metab_10237	Lipids and lipid-like molecules	Glycerophospholipids	Glycerophosphoethanolamines	Pe(22:4(7Z,10Z,13Z,16Z)/18:0)		down	down	down
763	metab_11099	Lipids and lipid-like molecules	Glycerophospholipids	Glycerophosphoethanolamines	Pe(P-18:1(11Z)/22:4(7Z,10Z,13Z,16Z))			down	down
764	metab_9571	Not Available	Not Available	Not Available	Pechueloic Acid				down
765	metab_5598	Organoheterocyclic compounds	Piperidines	Not Available	Pelletierine	down		down	down
766	metab_14342	Organoheterocyclic compounds	Imidazodiazepines	Not Available	Pentostatin		up	up	up
767	metab_4896	Phenylpropanoids and polyketides	Flavonoids	Flavonoid glycosides	Persiconin				up
768	metab_3417	Lipids and lipid-like molecules	Glycerophospholipids	Glycerophosphoglycerols	Pg(I-14:0/A-13:0)			up
769	metab_3892	Not Available	Not Available	Not Available	Pga3				down
770	metab_9369	Lipids and lipid-like molecules	Fatty Acyls	Eicosanoids	Pgf2A Ethanolamide	up		up	up
771	metab_11273	Not Available	Not Available	Not Available	Pgk2		down	down	down
772	metab_1323	Not Available	Not Available	Not Available	Phe Glu				down
773	metab_5439	Not Available	Not Available	Not Available	Phenazine-1,6-Dicarboxylic Acid				up
774	metab_8009	Not Available	Not Available	Not Available	Phenolphthalin			down	down
775	metab_8503	Not Available	Not Available	Not Available	Phenylacetylaspartic Acid	up	up	up
776	metab_12790	Organic acids and derivatives	Carboxylic acids and derivatives	Amino acids, peptides, and analogues	Phenylacetylglutamine		down
777	metab_1675	Organic acids and derivatives	Carboxylic acids and derivatives	Amino acids, peptides, and analogues	Phenylalanylphenylalanine				down
778	metab_8837	Benzenoids	Benzene and substituted derivatives	Phenylpyruvic acid derivatives	Phenylpyruvic Acid			down
779	metab_12189	Phenylpropanoids and polyketides	Linear 1,3-diarylpropanoids	Chalcones and dihydrochalcones	Phloretin		up	up	up
780	metab_1813	Phenylpropanoids and polyketides	Flavonoids	Flavonoid glycosides	Phloretin 2'-O-Glucuronide	up	up	up	up
781	metab_7387	Homogeneous non-metal compounds	Non-metal oxoanionic compounds	Non-metal phosphates	Phosphate				down
782	metab_9185	Benzenoids	Benzene and substituted derivatives	Benzoic acids and derivatives	Phthalamic Acid			down	down
783	metab_5101	Alkaloids and derivatives	Not Available	Not Available	Pilocarpine			up	up
784	metab_9795	Phenylpropanoids and polyketides	Flavonoids	Flavones	Pinoquercetin		down	down
785	metab_11508	Not Available	Not Available	Not Available	Pip(18:1(11Z)/20:4(5Z,8Z,11Z,14Z)-Oh(16R))		up
786	metab_2284	Not Available	Not Available	Not Available	Pip(Pgj2/18:0)		up
787	metab_12231	Phenylpropanoids and polyketides	Isoflavonoids	Furanoisoflavonoids	Pisatin	down
788	metab_9876	Organic oxygen compounds	Organic oxides	Not Available	Polygodial		down	down	down
789	metab_9809	Lipids and lipid-like molecules	Steroids and steroid derivatives	Steroidal glycosides	Polypodosaponin				down
790	metab_1845	Phenylpropanoids and polyketides	Flavonoids	Flavonoid glycosides	Poncirin		up	up	up
791	metab_11712	Not Available	Not Available	Not Available	Pratol		up	up	up
792	metab_8062	Organic acids and derivatives	Hydroxy acids and derivatives	Medium-chain hydroxy acids and derivatives	Pravastatin	up	up
793	metab_9016	Lipids and lipid-like molecules	Fatty Acyls	Fatty acyl glycosides	Prenyl Glucoside			up	up
794	metab_600	Organic acids and derivatives	Carboxylic acids and derivatives	Amino acids, peptides, and analogues	Proline Betaine	up
795	metab_7872	Organoheterocyclic compounds	Azoles	Imidazoles	Propranolol Glucuronide		down
796	metab_10081	Lipids and lipid-like molecules	Fatty Acyls	Eicosanoids	Prostaglandin D2			down
797	metab_4344	Lipids and lipid-like molecules	Fatty Acyls	Eicosanoids	Prostaglandin F1A	up		up	up
798	metab_3891	Lipids and lipid-like molecules	Fatty Acyls	Eicosanoids	Prostaglandin J2			down	down
799	metab_4288	Phenylpropanoids and polyketides	Isoflavonoids	O-methylated isoflavonoids	Prunetin			up	up
800	metab_3668	Lipids and lipid-like molecules	Glycerophospholipids	Glycerophosphoserines	Ps(15:0/16:1(9Z))			up
801	metab_10238	Not Available	Not Available	Not Available	Ps(22:6(5Z,8E,10Z,13Z,15E,19Z)-2Oh(7S, 17S)/18:0)		down	down	down
802	metab_7550	Nucleosides, nucleotides, and analogues	Nucleoside and nucleotide analogues	Not Available	Pseudouridine	up			down
803	metab_7322	Organic oxygen compounds	Organooxygen compounds	Carbohydrates and carbohydrate conjugates	Pseudouridine 5'-Phosphate	down			down
804	metab_9316	Phenylpropanoids and polyketides	Isoflavonoids	Isoflavonoid C-glycosides	Puerarin		up	up	up
805	metab_9377	Benzenoids	Anthracenes	Anthraquinones	Purpurin		up	up	up
806	metab_5289	Organoheterocyclic compounds	Pyrazolopyrimidines	Not Available	Pyrazolopyrimidinone			down	down
807	metab_12677	Organic acids and derivatives	Carboxylic acids and derivatives	Amino acids, peptides, and analogues	Pyridinoline		up
808	metab_5422	Organoheterocyclic compounds	Pyridines and derivatives	Pyridoxines	Pyridoxine				up
809	metab_5394	Not Available	Not Available	Not Available	Pyridoxine+O-Hex		up	up	up
810	metab_807	Benzenoids	Phenols	Benzenetriols and derivatives	Pyrogallol			up
811	metab_4969	Not Available	Not Available	Not Available	Pyr-Phe-Oh				down
812	metab_3836	Organic oxygen compounds	Organooxygen compounds	Ethers	Quinceoxepine				down
813	metab_7375	Organic oxygen compounds	Organooxygen compounds	Alcohols and polyols	Quinic Acid				up
814	metab_8917	Organic oxygen compounds	Organooxygen compounds	Carbohydrates and carbohydrate conjugates	Raffinose			up
815	metab_13895	Organic acids and derivatives	Carboxylic acids and derivatives	Amino acids, peptides, and analogues	Ramiprilat	up
816	metab_1066	Organoheterocyclic compounds	Piperidines	Phenylpiperidines	Reduced Haloperidol			down	down
817	metab_1054	Organoheterocyclic compounds	Diazanaphthalenes	Benzodiazines	Remdesivir			up	up
818	metab_9647	Phenylpropanoids and polyketides	Flavonoids	Flavones	Resokaempherol		up	up	up
819	metab_11861	Benzenoids	Phenols	Benzenediols	Resorcinol		up	up
820	metab_5167	Lipids and lipid-like molecules	Prenol lipids	Terpene lactones	Reynosin			up	up
821	metab_11178	Lipids and lipid-like molecules	Fatty Acyls	Fatty acids and conjugates	Ricinoleic Acid		down	down	down
822	metab_403	Organic acids and derivatives	Carboxylic acids and derivatives	Amino acids, peptides, and analogues	Ritipenem				up
823	metab_12332	Phenylpropanoids and polyketides	Stilbenes	Stilbene glycosides	Rose Oxide (Cis)			up
824	metab_11378	Benzenoids	Anthracenes	Anthraquinones	Rubiadin		up	up	up
825	metab_1213	Not Available	Not Available	Not Available	Rx 821002 Hydrochloride			down
826	metab_1722	Lipids and lipid-like molecules	Fatty Acyls	Fatty acyl thioesters	S-(2-Methylbutanoyl)-Dihydrolipoamide	up		up
827	metab_8367	Benzenoids	Benzene and substituted derivatives	Biphenyls and derivatives	Sacubitrilat	down	down	down	down
828	metab_9293	Benzenoids	Benzene and substituted derivatives	Benzoic acids and derivatives	Salicylic Acid		down	down	down
829	metab_8158	Organic oxygen compounds	Organooxygen compounds	Carbohydrates and carbohydrate conjugates	Salicylic Acid Glucoside			down
830	metab_8575	Organic oxygen compounds	Organooxygen compounds	Carbohydrates and carbohydrate conjugates	Salviaflaside Methyl Ester			down
831	metab_2017	Alkaloids and derivatives	Benzophenanthridine alkaloids	Quaternary benzophenanthridine alkaloids	Sanguinarine			up
832	metab_5825	Organic acids and derivatives	Carboxylic acids and derivatives	Amino acids, peptides, and analogues	Sarcosine	up	up		up
833	metab_1065	Lipids and lipid-like molecules	Fatty Acyls	Fatty acyl glycosides	Sarmentosin			up
834	metab_1040	Not Available	Not Available	Not Available	Scopoline				down
835	metab_8236	Phenylpropanoids and polyketides	2-arylbenzofuran flavonoids	Not Available	Scorzonoside		up
836	metab_4740	Lipids and lipid-like molecules	Fatty Acyls	Fatty acid esters	Sebacoyl-L-Carnitine		up
837	metab_505	Not Available	Not Available	Not Available	Ser Cys Cys		down
838	metab_4992	Not Available	Not Available	Not Available	Ser Glu Leu	up
839	metab_5214	Not Available	Not Available	Not Available	Ser Leu Asp				up
840	metab_5020	Not Available	Not Available	Not Available	Ser Thr Leu	up
841	metab_1472	Not Available	Not Available	Not Available	Ser Val Leu	up
842	metab_7766	Organic oxygen compounds	Organooxygen compounds	Carbohydrates and carbohydrate conjugates	Simmondsin				up
843	metab_1482	Phenylpropanoids and polyketides	Cinnamic acids and derivatives	Hydroxycinnamic acids and derivatives	Simmondsin 2'-Ferulate			down
844	metab_3557	Lipids and lipid-like molecules	Sphingolipids	Phosphosphingolipids	Sm(D18:1/12:0)		up	up
845	metab_1578	Alkaloids and derivatives	Camptothecins	Not Available	Sn-38		up	up	up
846	metab_4828	Not Available	Not Available	Not Available	Sodium Demethylcantharidate		down
847	metab_11073	Lipids and lipid-like molecules	Sphingolipids	Glycosphingolipids	Soyacerebroside I			down	down
848	metab_11586	Not Available	Not Available	Not Available	Soyasapogenol B Base+O-Hexa-Hexa-Hex+Me+Acetyl		up
849	metab_1559	Organoheterocyclic compounds	Dioxanes	1,4-dioxanes	Spectinomycin	up		up
850	metab_282	Organic nitrogen compounds	Organonitrogen compounds	Amines	Spermidine	down
851	metab_13794	Not Available	Not Available	Not Available	Spongothymidine	up
852	metab_8034	Nucleosides, nucleotides, and analogues	Nucleoside and nucleotide analogues	Not Available	Stavudine	up
853	metab_1425	Not Available	Not Available	Not Available	Strophanthidin Semicarbazide				down
854	metab_12444	Lipids and lipid-like molecules	Fatty Acyls	Fatty acids and conjugates	Suberic Acid	up
855	metab_14368	Organic oxygen compounds	Organooxygen compounds	Carbohydrates and carbohydrate conjugates	Sucrose			up	up
856	metab_4801	Organoheterocyclic compounds	Quinolines and derivatives	Indoloquinolines	Sulfamide, N,N-Dimethyl-N'-((8Alpha)-6-Propylergolin-8-Yl)-		up
857	metab_8518	Not Available	Not Available	Not Available	Sulfo Jasmonate		up
858	metab_12768	Benzenoids	Benzene and substituted derivatives	Phenylpropanes	Suloctidil	up
859	metab_2976	Lipids and lipid-like molecules	Prenol lipids	Terpene glycosides	Suspensolide F				up
860	metab_5003	Not Available	Not Available	Not Available	Swainsonine			down	down
861	metab_789	Not Available	Not Available	Not Available	T-4-Aminocrotonic Acid				up
862	metab_1848	Phenylpropanoids and polyketides	Flavonoids	O-methylated flavonoids	Tamarixetin		up	up	up
863	metab_4917	Benzenoids	Tetralins	Not Available	Tamibarotene		up	up
864	metab_4546	Lipids and lipid-like molecules	Prenol lipids	Sesquiterpenoids	Tanacetol A			down	down
865	metab_9434	Lipids and lipid-like molecules	Prenol lipids	Diterpenoids	Tanshinol A	up	up	up	up
866	metab_8714	Not Available	Not Available	Not Available	Tanshinone Iia Sulfonate		up	up	up
867	metab_5839	Organic acids and derivatives	Carboxylic acids and derivatives	Amino acids, peptides, and analogues	Targinine				up
868	metab_11962	Lipids and lipid-like molecules	Prenol lipids	Terpene lactones	Tatridin B				down
869	metab_13320	Organic acids and derivatives	Carboxylic acids and derivatives	Amino acids, peptides, and analogues	Telotristat		down	down	down
870	metab_8691	Organic oxygen compounds	Organooxygen compounds	Carbohydrates and carbohydrate conjugates	Temazepam Glucuronide		up
871	metab_7831	Organoheterocyclic compounds	Imidazopyrimidines	Purines and purine derivatives	Tenofovir Disoproxil		down	down	down
872	metab_2111	Not Available	Not Available	Not Available	Tetradecyldiethanolamine		down	down
873	metab_8341	Organic oxygen compounds	Organooxygen compounds	Ethers	Tetraethylene Glycol	up
874	metab_13918	Organic acids and derivatives	Carboxylic acids and derivatives	Amino acids, peptides, and analogues	Tetrahydrodipicolinate	up		up	up
875	metab_9438	Lipids and lipid-like molecules	Fatty Acyls	Fatty acids and conjugates	Tetranorprostanedioic Acid				down
876	metab_1051	Organoheterocyclic compounds	Diazines	Pyrimidines and pyrimidine derivatives	Tezacitabine				up
877	metab_1365	Not Available	Not Available	Not Available	Thr Glu Ile	up
878	metab_1328	Not Available	Not Available	Not Available	Thr Gly Ile	up
879	metab_9993	Lipids and lipid-like molecules	Fatty Acyls	Eicosanoids	Thromboxane A2			down
880	metab_4025	Lipids and lipid-like molecules	Fatty Acyls	Eicosanoids	Thromboxane B2		up	up	up
881	metab_11267	Lipids and lipid-like molecules	Fatty Acyls	Eicosanoids	Thromboxane B3		down	down	down
882	metab_5588	Organic acids and derivatives	Carboxylic acids and derivatives	Amino acids, peptides, and analogues	Thr-Pro		up		up
883	metab_5127	Nucleosides, nucleotides, and analogues	Pyrimidine nucleosides	Pyrimidine 2''-deoxyribonucleosides	Thymidine	up		down
884	metab_1164	Organoheterocyclic compounds	Diazines	Pyrimidines and pyrimidine derivatives	Thymine	up
885	metab_771	Organic acids and derivatives	Carboxylic acids and derivatives	Amino acids, peptides, and analogues	Tilarginine				up
886	metab_13161	Phenylpropanoids and polyketides	Cinnamic acids and derivatives	Hydroxycinnamic acids and derivatives	Trans-Caffeic Acid [Apiosyl-(1->6)-Glucosyl] Ester			up
887	metab_9137	Lipids and lipid-like molecules	Fatty Acyls	Fatty acids and conjugates	Traumatic Acid		up	up	up
888	metab_9078	Lipids and lipid-like molecules	Fatty Acyls	Fatty acids and conjugates	Traumatin				down
889	metab_14073	Organic oxygen compounds	Organooxygen compounds	Carbohydrates and carbohydrate conjugates	Trehalose			up	up
890	metab_5089	Benzenoids	Phenol ethers	Not Available	Triadimefon		up
891	metab_7290	Organic acids and derivatives	Carboxylic acids and derivatives	Tricarboxylic acids and derivatives	Tricarballylic Acid			up	up
892	metab_13051	Phenylpropanoids and polyketides	Flavonoids	Flavonoid glycosides	Tricin 7-Neohesperidoside		up	up	up
893	metab_1428	Not Available	Not Available	Not Available	Triisopropanolamine		up	up	up
894	metab_4851	Lipids and lipid-like molecules	Steroids and steroid derivatives	Estrane steroids	Trilostane		up	up
895	metab_1642	Organic acids and derivatives	Vinylogous acids	Not Available	Trinexapac-Ethyl	down
896	metab_824	Alkaloids and derivatives	Tropane alkaloids	Not Available	Tropinone				up
897	metab_1334	Organic oxygen compounds	Organooxygen compounds	Carbohydrates and carbohydrate conjugates	Tuliposide A	up	up
898	metab_1459	Organic oxygen compounds	Organooxygen compounds	Carbohydrates and carbohydrate conjugates	Tyramine Glucuronide		up
899	metab_6949	Organic acids and derivatives	Organic sulfuric acids and derivatives	Arylsulfates	Tyramine-O-Sulfate		up
900	metab_1437	Organic acids and derivatives	Carboxylic acids and derivatives	Amino acids, peptides, and analogues	Ulimorelin	up	up	up	up
901	metab_12119	Lipids and lipid-like molecules	Fatty Acyls	Fatty acids and conjugates	Undecanedioic Acid		up	up	up
902	metab_9254	Lipids and lipid-like molecules	Fatty Acyls	Fatty acids and conjugates	Undecylenic Acid		up	up	up
903	metab_5355	Organoheterocyclic compounds	Diazines	Pyrimidines and pyrimidine derivatives	Uracil	up
904	metab_13302	Benzenoids	Benzene and substituted derivatives	Benzoic acids and derivatives	Uralenneoside			down
905	metab_14002	Nucleosides, nucleotides, and analogues	Pyrimidine nucleosides	Not Available	Uridine	up
906	metab_7064	Organic oxygen compounds	Organooxygen compounds	Carbohydrates and carbohydrate conjugates	Uridine 2'-Phosphate	down
907	metab_5400	Nucleosides, nucleotides, and analogues	Ribonucleoside 3''-phosphates	Not Available	Uridine 3'-Monophosphate	down	down		down
908	metab_14005	Nucleosides, nucleotides, and analogues	Pyrimidine nucleotides	Pyrimidine ribonucleotides	Uridine 5'-Monophosphate	down
909	metab_7067	Not Available	Not Available	Not Available	Uridine Monophosphate (Ump)	down
910	metab_4772	Not Available	Not Available	Not Available	Val Asp Leu	up
911	metab_4386	Organic acids and derivatives	Carboxylic acids and derivatives	Amino acids, peptides, and analogues	Valacyclovir				down
912	metab_842	Lipids and lipid-like molecules	Fatty Acyls	Fatty acids and conjugates	Valeric Acid	up
913	metab_1960	Organic oxygen compounds	Organooxygen compounds	Carbohydrates and carbohydrate conjugates	Validamycin A	up	up	up	up
914	metab_5032	Organic acids and derivatives	Carboxylic acids and derivatives	Amino acids, peptides, and analogues	Valylisoleucine		down		up
915	metab_5188	Organic acids and derivatives	Carboxylic acids and derivatives	Amino acids, peptides, and analogues	Valylproline				up
916	metab_4649	Benzenoids	Benzene and substituted derivatives	Benzoic acids and derivatives	Vanillic Acid		down
917	metab_1787	Benzenoids	Phenol ethers	Anisoles	Venlafaxine	up			down
918	metab_9959	Lipids and lipid-like molecules	Fatty Acyls	Fatty acids and conjugates	Vernolic Acid			down
919	metab_4164	Not Available	Not Available	Not Available	Verrucarol		down	down	down
920	metab_1689	Phenylpropanoids and polyketides	Isoflavonoids	Isoflavonoid O-glycosides	Wistin			down
921	metab_7349	Organoheterocyclic compounds	Imidazopyrimidines	Purines and purine derivatives	Xanthine	down
922	metab_4024	Lipids and lipid-like molecules	Fatty Acyls	Fatty acids and conjugates	Xi-5-Hydroxydodecanoic Acid				down
923	metab_8390	Organic acids and derivatives	Carboxylic acids and derivatives	Amino acids, peptides, and analogues	Zabicipril	up
924	metab_4469	Organoheterocyclic compounds	Quinolines and derivatives	Quinolones and derivatives	Zanthodioline				down
925	metab_11526	Lipids and lipid-like molecules	Prenol lipids	Sesquiterpenoids	Zerumbone			down	down
926	metab_4558	Organoheterocyclic compounds	Dihydrofurans	Furanones	Zilascorb				down

## Sheet: Table S4B
Table S4B The DAMs in DP vs NP group
Metab ID	HMDB Superclass	HMDB Class	HMDB Subclass	Metabolite	P_value	FDR	VIP_pred_OPLS-DA	VIP_PLS-DA	FC(DP/NP)	Log2FC(DP/NP)	Significant	Regulate
metab_1854	Phenylpropanoids and polyketides	Coumarins and derivatives	Furanocoumarins	Apiumoside	0.0003075	0.03922	5.0004	4.9485	1.6421	0.7155	yes	up
metab_5390	Organoheterocyclic compounds	Azoles	Pyrazoles	Antipyrine	0.001341	0.08291	4.8114	4.569	1.9299	0.9485	yes	up
metab_4818	Lipids and lipid-like molecules	Fatty Acyls	Fatty acid esters	Dodec-7-Enedioylcarnitine	0.0001937	0.02906	4.4844	4.3602	1.3816	0.4663	yes	up
metab_4930	-	-	-	N-Octanoyl-Dl-Homoserine Lactone	1.78e-05	0.008266	4.1606	4.0223	1.3296	0.411	yes	up
metab_4914	Lipids and lipid-like molecules	Fatty Acyls	Fatty acid esters	4-Hydroxyhexanoycarnitine	0.0004058	0.04591	4.0875	3.9819	1.3419	0.4243	yes	up
metab_5030	Lipids and lipid-like molecules	Glycerolipids	Monoradylglycerols	1-O-Pentylglycerol	0.001277	0.08049	4.0824	3.8567	1.3852	0.4701	yes	up
metab_1817	Organic acids and derivatives	Carboxylic acids and derivatives	Amino acids, peptides, and analogues	Asp F I	2.29e-05	0.009461	4.0353	3.9556	1.3096	0.3891	yes	up
metab_8034	Nucleosides, nucleotides, and analogues	Nucleoside and nucleotide analogues	Not Available	Stavudine	0.03341	0.341	3.8995	3.8731	2.6195	1.3893	yes	up
metab_14080	Lipids and lipid-like molecules	Steroids and steroid derivatives	Hydroxysteroids	Galactinol	0.0006916	0.06125	3.8649	3.6574	1.2791	0.3551	yes	up
metab_9526	Organoheterocyclic compounds	Heteroaromatic compounds	Not Available	2-Methyl-3-Furyl Methylthiomethyl Disulfide	0.0003427	0.04066	3.7573	3.6232	1.2213	0.2885	yes	up
metab_1722	Lipids and lipid-like molecules	Fatty Acyls	Fatty acyl thioesters	S-(2-Methylbutanoyl)-Dihydrolipoamide	0.02483	0.3093	3.662	3.4884	1.296	0.374	yes	up
metab_4964	Lipids and lipid-like molecules	Fatty Acyls	Fatty acid esters	3-Hydroxyhexanoylcarnitine	0.001052	0.07336	3.6065	3.4985	1.305	0.384	yes	up
metab_8632	Phenylpropanoids and polyketides	Flavonoids	Flavonoid glycosides	Apigenin 7-[Rhamnosyl-(1->2)-Galacturonide]	0.01843	0.2724	3.5717	3.4942	1.4086	0.4943	yes	up
metab_4334	Phenylpropanoids and polyketides	Isoflavonoids	Furanoisoflavonoids	Medicarpin 3-O-(6'-Malonylglucoside)	0.009455	0.2042	3.422	3.4465	1.2561	0.3289	yes	up
metab_9815	Organic acids and derivatives	Carboxylic acids and derivatives	Tetracarboxylic acids and derivatives	2-((2-((Dimethoxyphosphorothioyl)Thio)-4-Ethoxy-4-Oxobutanoyl)Oxy)-2-Methylmalonic Acid	0.001358	0.08331	3.3913	3.3234	1.196	0.2582	yes	up
metab_5236	Organic acids and derivatives	Carboxylic acids and derivatives	Amino acids, peptides, and analogues	4,5-Seco-Dopa	0.004919	0.152	3.3905	3.1868	1.2407	0.3111	yes	up
metab_1619	Benzenoids	Phenol ethers	Not Available	Esmolol	0.0264	0.316	3.3653	3.0584	1.2511	0.3232	yes	up
metab_1630	-	-	-	3-Desoxy-3,4-Methylenedioxy Pyrovalerone	0.01164	0.2246	3.361	3.344	1.274	0.3494	yes	up
metab_9701	Phenylpropanoids and polyketides	Flavonoids	Hydroxyflavonoids	Apigenidin	0.006805	0.1778	3.3574	3.1911	1.2251	0.2928	yes	up
metab_282	Organic nitrogen compounds	Organonitrogen compounds	Amines	Spermidine	0.04049	0.3659	3.2274	2.9475	0.8029	-0.3168	yes	down
metab_9369	Lipids and lipid-like molecules	Fatty Acyls	Eicosanoids	Pgf2A Ethanolamide	0.003472	0.1314	3.2174	3.2511	1.2412	0.3117	yes	up
metab_4724	Benzenoids	Phenols	4-alkoxyphenols	4-Hydroxy-Alprenolol	0.01294	0.2348	3.1318	2.975	1.2606	0.3341	yes	up
metab_1332	Phenylpropanoids and polyketides	Macrolides and analogues	Zearalenones	(S,E)-Zearalenone	0.02408	0.3061	3.0705	2.906	1.2274	0.2956	yes	up
metab_4991	Lipids and lipid-like molecules	Prenol lipids	Monoterpenoids	Carvone	0.0002872	0.03743	3.051	2.879	1.141	0.1903	yes	up
metab_7289	Organoheterocyclic compounds	Naphthopyrans	Naphthopyranones	Cassiaside	0.005871	0.1677	3.0261	2.8662	1.1739	0.2313	yes	up
metab_12544	Organic acids and derivatives	Keto acids and derivatives	Medium-chain keto acids and derivatives	2-Keto-6-Acetamidocaproate	0.0003419	0.04066	3.0121	2.9412	1.2113	0.2766	yes	up
metab_4735	-	-	-	3-Amino-2-(1-Pyrrolidinylcarbonyl)-4(3H)-Quinazolinone	0.01646	0.261	2.9759	2.853	1.1967	0.2591	yes	up
metab_1705	Lipids and lipid-like molecules	Fatty Acyls	Fatty aldehydes	Octadec-9-Enal	0.005604	0.1631	2.9462	2.9042	1.2274	0.2956	yes	up
metab_852	Organoheterocyclic compounds	Furans	Furoic acid and derivatives	2,5-Furandicarboxylic Acid	0.03298	0.3395	2.9175	2.7907	0.8237	-0.2798	yes	down
metab_1924	-	-	-	N-(4-Bromo-2-Methoxyphenyl)-1-(3-Methoxyquinoxalin-2-Yl)Piperidine-3-Carboxamide	0.01586	0.2575	2.909	2.9143	1.1944	0.2563	yes	up
metab_11914	Organic oxygen compounds	Organooxygen compounds	Carbohydrates and carbohydrate conjugates	Alpha-D-Xylopyranosyl-(1->6)-Beta-D-Glucopyranosyl-(1->4)-D-Glucose	0.01089	0.2166	2.8773	2.9374	1.2044	0.2683	yes	up
metab_935	Nucleosides, nucleotides, and analogues	Purine nucleotides	Purine ribonucleotides	Adenosine Monophosphate	0.0006241	0.05757	2.8535	2.7089	0.8917	-0.1654	yes	down
metab_1618	Lipids and lipid-like molecules	Prenol lipids	Diterpenoids	(3S,5R,6R)-3,5-Dihydroxy-6,7-Didehydro-5,6-Dihydro-12'-Apo-Beta-Caroten-12'-Al	0.02799	0.3235	2.8437	2.5702	1.133	0.1802	yes	up
metab_1559	Organoheterocyclic compounds	Dioxanes	1,4-dioxanes	Spectinomycin	0.02845	0.3243	2.771	2.6864	1.1306	0.1771	yes	up
metab_1843	Lipids and lipid-like molecules	Prenol lipids	Diterpenoids	Musabalbisiane A	0.00141	0.08385	2.7436	2.6828	1.1308	0.1773	yes	up
metab_7391	Nucleosides, nucleotides, and analogues	Ribonucleoside 3''-phosphates	Not Available	Adenosine 3'-Monophosphate	0.001553	0.08825	2.7368	2.6145	0.9019	-0.149	yes	down
metab_9121	Phenylpropanoids and polyketides	Flavonoids	Flavones	Kaempferol	0.002767	0.1173	2.7367	2.7717	1.1626	0.2173	yes	up
metab_4344	Lipids and lipid-like molecules	Fatty Acyls	Eicosanoids	Prostaglandin F1A	0.00485	0.1511	2.6552	2.7142	1.1241	0.1688	yes	up
metab_13014	-	-	-	Icariside F2	0.01923	0.2751	2.6459	2.717	1.1773	0.2354	yes	up
metab_12192	Nucleosides, nucleotides, and analogues	Purine nucleosides	Purine 2''-deoxyribonucleosides	8-Hydroxy-2-Desoxyguanosine	0.003298	0.1299	2.6425	2.6045	1.1102	0.1508	yes	up
metab_1960	Organic oxygen compounds	Organooxygen compounds	Carbohydrates and carbohydrate conjugates	Validamycin A	0.01345	0.239	2.6318	2.7201	1.1317	0.1785	yes	up
metab_4669	Benzenoids	Benzene and substituted derivatives	Benzenesulfonamides	Amprenavir	0.02692	0.3193	2.599	2.4675	1.1422	0.1918	yes	up
metab_4492	Lipids and lipid-like molecules	Fatty Acyls	Fatty acid esters	Nonanedioylcarnitine	0.0001655	0.02756	2.5396	2.4228	1.086	0.119	yes	up
metab_9434	Lipids and lipid-like molecules	Prenol lipids	Diterpenoids	Tanshinol A	0.02172	0.2923	2.5011	2.6054	1.1859	0.246	yes	up
metab_1451	Lipids and lipid-like molecules	Fatty Acyls	Fatty acid esters	6-Hydroxyheptanoylcarnitine	0.001658	0.09164	2.4981	2.4257	1.1006	0.1383	yes	up
metab_1437	Organic acids and derivatives	Carboxylic acids and derivatives	Amino acids, peptides, and analogues	Ulimorelin	0.03708	0.3559	2.493	2.3885	1.1508	0.2026	yes	up
metab_2094	-	-	-	5,4'-Dimethoxy-7-Hydroxyflavone	0.0001102	0.02278	2.4427	2.3805	1.0653	0.0912	yes	up
metab_14028	Organic acids and derivatives	Keto acids and derivatives	Short-chain keto acids and derivatives	2-Keto-Glutaramic Acid	0.03974	0.3619	2.442	2.3664	1.1553	0.2083	yes	up
metab_1920	Organoheterocyclic compounds	Benzofurans	Not Available	7-Methyl-2-Benzofurancarboxaldehyde	0.01635	0.2607	2.4287	2.3986	1.1651	0.2205	yes	up
metab_4845	Lipids and lipid-like molecules	Prenol lipids	Sesquiterpenoids	(3S,5R,6R,7E)-3,5,6-Trihydroxy-7-Megastigmen-9-One	0.04557	0.379	2.3486	2.4292	1.1605	0.2148	yes	up
metab_6884	Organic acids and derivatives	Hydroxy acids and derivatives	Beta hydroxy acids and derivatives	3-Hydroxypyruvic Acid	0.006743	0.1769	2.3422	2.2725	1.1802	0.2391	yes	up
metab_1381	Lignans, neolignans and related compounds	Lignan glycosides	Not Available	Arctiin	0.004776	0.1499	2.3309	2.3121	1.1051	0.1441	yes	up
metab_14701	Organic acids and derivatives	Carboxylic acids and derivatives	Amino acids, peptides, and analogues	6-(2-Amino-2-Carboxyethyl)-4-Hydroxybenzothiazole	0.0009723	0.07114	2.3171	2.2151	0.9237	-0.1145	yes	down
metab_9872	Benzenoids	Fluorenes	Not Available	Fluorenylmethyl Chloroformate	0.01236	0.2281	2.3041	2.2121	1.1014	0.1393	yes	up
metab_1696	Lipids and lipid-like molecules	Fatty Acyls	Fatty acid esters	6-Hydroxynon-7-Enoylcarnitine	0.0002375	0.03389	2.2763	2.1997	1.0582	0.0816	yes	up
metab_5400	Nucleosides, nucleotides, and analogues	Ribonucleoside 3''-phosphates	Not Available	Uridine 3'-Monophosphate	0.00732	0.1833	2.2733	2.1973	0.9213	-0.1182	yes	down
metab_1698	Benzenoids	Phenols	Tyrosols and derivatives	O-Demethylmetoprolol	0.0002468	0.03441	2.2616	2.1876	1.0736	0.1025	yes	up
metab_12909	-	-	-	2-(2-Acetyl-3-Hydroxy-5-Methoxyphenyl)Acetic Acid	0.03513	0.3492	2.255	2.178	1.1242	0.1689	yes	up
metab_5395	Alkaloids and derivatives	Tropane alkaloids	Not Available	Ecgonine	0.004234	0.143	2.2357	2.2049	0.9369	-0.0941	yes	down
metab_4610	Lipids and lipid-like molecules	Fatty Acyls	Fatty acid esters	Nona-3,5,7-Trienoylcarnitine	0.04682	0.3809	2.2333	2.0257	1.0923	0.1274	yes	up
metab_8190	Lipids and lipid-like molecules	Prenol lipids	Terpene glycosides	Paeoniflorin	0.00437	0.144	2.2295	2.1803	0.9289	-0.1064	yes	down
metab_13752	Organic acids and derivatives	Carboxylic acids and derivatives	Amino acids, peptides, and analogues	N(2)-Phenylacetyl-L-Glutaminate	0.02476	0.3093	2.213	2.2093	1.099	0.1362	yes	up
metab_7349	Organoheterocyclic compounds	Imidazopyrimidines	Purines and purine derivatives	Xanthine	0.0002086	0.03031	2.1947	2.1941	0.9368	-0.0942	yes	down
metab_11505	Organic oxygen compounds	Organooxygen compounds	Carbohydrates and carbohydrate conjugates	Ntp	0.01498	0.2499	2.192	2.0936	1.0828	0.1147	yes	up
metab_8077	Organoheterocyclic compounds	Isoindoles and derivatives	Isoindolines	5-Hydroxy-3-(4-Hydroxyphenyl)-6-Methoxy-7-[(2S,4S,5S)-3,4,5-Trihydroxy-6-(Hydroxymethyl)Oxan-2-Yl]Oxychromen-4-One	0.008025	0.1913	2.1778	2.2111	0.9202	-0.12	yes	down
metab_4673	Lipids and lipid-like molecules	Fatty Acyls	Fatty acid esters	(2Z)-Non-2-Enoylcarnitine	0.001609	0.08938	2.1662	2.1156	1.0675	0.0943	yes	up
metab_9521	-	-	-	2'-Methoxyformonetin	0.004341	0.144	2.1646	2.1401	1.0782	0.1086	yes	up
metab_1921	Phenylpropanoids and polyketides	Isoflavonoids	Furanoisoflavonoids	Medicarpin	0.03617	0.3553	2.1568	2.1625	1.0932	0.1286	yes	up
metab_8503	-	-	-	Phenylacetylaspartic Acid	2.37e-05	0.009468	2.1507	2.0581	1.0573	0.0803	yes	up
metab_4998	Organoheterocyclic compounds	Piperidines	Not Available	4-Hydroxy-2,2,6,6-Tetramethylpiperidine-1-Oxyl	0.01096	0.2169	2.1402	1.9822	1.084	0.1164	yes	up
metab_7306	Organic acids and derivatives	Carboxylic acids and derivatives	Tricarboxylic acids and derivatives	Citric Acid	0.02828	0.3242	2.1261	2.055	0.9468	-0.0789	yes	down
metab_11923	Nucleosides, nucleotides, and analogues	Purine nucleosides	Not Available	Inosine	0.008982	0.201	2.1194	2.1975	1.1017	0.1398	yes	up
metab_1946	-	-	-	Karakoline	0.007924	0.1907	2.1147	2.1899	1.0899	0.1243	yes	up
metab_11972	-	-	-	Isosulochrin	2.71e-05	0.01048	2.1038	2.0565	1.0676	0.0944	yes	up
metab_11302	Phenylpropanoids and polyketides	Flavonoids	Flavones	Norizalpinin	0.01255	0.2301	2.0925	2.0319	0.9333	-0.0996	yes	down
metab_7303	Organoheterocyclic compounds	Furans	Furoic acid and derivatives	2-Furoic Acid	0.02412	0.3061	2.0889	2.0196	0.9374	-0.0933	yes	down
metab_12480	Lipids and lipid-like molecules	Steroids and steroid derivatives	Steroid esters	Beta-Estradiol 17-Propionate	0.0126	0.2303	2.0826	2.1195	1.1461	0.1968	yes	up
metab_5598	Organoheterocyclic compounds	Piperidines	Not Available	Pelletierine	0.0107	0.2154	2.0592	2.0401	0.9321	-0.1014	yes	down
metab_7809	Organic oxygen compounds	Organooxygen compounds	Carbohydrates and carbohydrate conjugates	Furaneol 4-(6-Malonylglucoside)	0.01321	0.2378	2.0578	2.0029	1.0827	0.1146	yes	up
metab_1749	Lipids and lipid-like molecules	Fatty Acyls	Lineolic acids and derivatives	Dihydrojasmonic Acid	0.0006821	0.06104	2.044	1.948	1.0625	0.0875	yes	up
metab_1761	Organic acids and derivatives	Carboxylic acids and derivatives	Amino acids, peptides, and analogues	N-Undecanoylglycine	0.02907	0.326	2.0035	2.048	1.0855	0.1183	yes	up
metab_9709	-	-	-	5-O-Methylbiochanin A	0.0382	0.359	1.9948	1.9188	1.0859	0.1189	yes	up
metab_14116	Organic acids and derivatives	Carboxylic acids and derivatives	Amino acids, peptides, and analogues	N-Formyl-L-Glutamic Acid	0.0045	0.1454	1.9793	1.8686	1.1009	0.1387	yes	up
metab_8209	Not Available	Not Available	Not Available	Dg(5-Iso Pgf2Vi/2:0/0:0)	0.0168	0.2635	1.9656	1.9167	1.0686	0.0957	yes	up
metab_11596	Alkaloids and derivatives	Ergoline and derivatives	Lysergic acids and derivatives	Ergocornine	0.01212	0.2264	1.9595	1.8873	0.9452	-0.0813	yes	down
metab_7337	Organoheterocyclic compounds	Pyrroles	Substituted pyrroles	1-Methylpyrrole-2,5-Diol	0.0101	0.2103	1.939	1.9008	1.0805	0.1118	yes	up
metab_9573	Phenylpropanoids and polyketides	Flavonoids	Flavones	Apigenin	0.01193	0.2251	1.9244	1.8703	0.9459	-0.0802	yes	down
metab_1824	-	-	-	Cycloheptyl-(4-Hydroxy-1-Oxa-9-Azaspiro[5.5]Undecan-9-Yl)Methanone	0.01265	0.2306	1.9185	1.8719	0.9425	-0.0854	yes	down
metab_1552	Organic oxygen compounds	Organooxygen compounds	Alcohols and polyols	Ovalicin	0.002768	0.1173	1.8988	1.8585	1.0541	0.076	yes	up
metab_622	Nucleosides, nucleotides, and analogues	Pyrimidine nucleotides	Cyclic pyrimidine nucleotides	Cifostodine	0.01492	0.2498	1.8906	1.8094	0.9436	-0.0838	yes	down
metab_9543	Organoheterocyclic compounds	Heteroaromatic compounds	Not Available	3-(4-Methyl-3-Pentenyl)Thiophene	0.0253	0.3125	1.8844	1.8552	0.9243	-0.1136	yes	down
metab_7064	Organic oxygen compounds	Organooxygen compounds	Carbohydrates and carbohydrate conjugates	Uridine 2'-Phosphate	0.01234	0.2281	1.8832	1.8096	0.9471	-0.0783	yes	down
metab_4311	Phenylpropanoids and polyketides	Flavonoids	O-methylated flavonoids	2',5,6-Trimethoxyflavone	0.03168	0.3368	1.8787	1.7409	1.0598	0.0838	yes	up
metab_1803	-	-	-	Everninic Acid	0.0233	0.3042	1.8672	1.7863	1.064	0.0895	yes	up
metab_4374	Organic oxygen compounds	Organooxygen compounds	Carbonyl compounds	2-Hydroxyacetophenone	0.03725	0.3559	1.8528	1.8387	1.0777	0.108	yes	up
metab_9501	Benzenoids	Naphthalenes	Naphthoquinones	Acetylshikonin	0.01309	0.2361	1.8528	1.7084	1.0534	0.075	yes	up
metab_14387	Organic oxygen compounds	Organooxygen compounds	Carbohydrates and carbohydrate conjugates	Lactulose	0.03288	0.3391	1.8476	1.6831	1.0574	0.0806	yes	up
metab_1787	Benzenoids	Phenol ethers	Anisoles	Venlafaxine	0.04268	0.3687	1.8407	1.7722	1.0699	0.0975	yes	up
metab_1813	Phenylpropanoids and polyketides	Flavonoids	Flavonoid glycosides	Phloretin 2'-O-Glucuronide	0.03668	0.3553	1.8386	1.9295	1.1122	0.1534	yes	up
metab_13196	Organoheterocyclic compounds	Isoindoles and derivatives	Isoindolines	(Z)-Narceine Imide	0.02259	0.2997	1.8221	1.7822	0.9388	-0.0911	yes	down
metab_4727	-	-	-	N-3-Oxo-Tetradec-7(Z)-Enoyl-L-Homoserine Lactone	0.006716	0.1769	1.8127	1.7141	1.0602	0.0844	yes	up
metab_2028	Phenylpropanoids and polyketides	Isoflavonoids	Isoflavans	Dalbergioidin	0.03032	0.3305	1.8124	1.7476	0.9413	-0.0872	yes	down
metab_6860	Lipids and lipid-like molecules	Glycerophospholipids	Glycerophosphoinositols	Glycerophosphoinositol	0.01767	0.2662	1.8081	1.7288	0.9559	-0.0651	yes	down
metab_4371	Phenylpropanoids and polyketides	Flavonoids	O-methylated flavonoids	3,3',4',5,6,7,8-Heptamethoxyflavone	0.02906	0.326	1.7907	1.7658	1.0642	0.0898	yes	up
metab_898	Organoheterocyclic compounds	Imidazopyrimidines	Purines and purine derivatives	Oxypurinol	0.0003256	0.04026	1.7883	1.7896	0.9565	-0.0641	yes	down
metab_4591	Organic acids and derivatives	Carboxylic acids and derivatives	Amino acids, peptides, and analogues	N-Omega-Propyl-L-Arginine	0.0005138	0.05177	1.7835	1.7455	1.0506	0.0712	yes	up
metab_9612	Phenylpropanoids and polyketides	Linear 1,3-diarylpropanoids	Chalcones and dihydrochalcones	Isoliquiritigenin	0.01189	0.2251	1.7832	1.8804	1.064	0.0894	yes	up
metab_4339	Not Available	Not Available	Not Available	Oxonol	0.02256	0.2996	1.7798	1.8522	1.0738	0.1027	yes	up
metab_1737	Lipids and lipid-like molecules	Fatty Acyls	Fatty acid esters	3-Hydroxynona-5,7-Dienoylcarnitine	0.01961	0.277	1.7792	1.6598	1.0474	0.0668	yes	up
metab_1816	Lipids and lipid-like molecules	Fatty Acyls	Fatty acids and conjugates	Dioscoretine	0.03933	0.3616	1.7714	1.7469	1.0704	0.0982	yes	up
metab_7498	-	-	-	N-(2,5-Dioxocyclopentyl)Acetamide	0.002626	0.1156	1.7673	1.6528	1.0494	0.0696	yes	up
metab_4657	Organoheterocyclic compounds	Piperidines	Piperidinones	Cycloheximide	0.0171	0.2636	1.7486	1.6203	1.049	0.0691	yes	up
metab_4405	-	-	-	Izalpinin	0.009483	0.2042	1.7446	1.7396	0.9447	-0.0821	yes	down
metab_8674	Phenylpropanoids and polyketides	Flavonoids	Flavans	Dihydrokaempferol	0.01344	0.239	1.7442	1.7507	0.94	-0.0893	yes	down
metab_5155	Nucleosides, nucleotides, and analogues	Purine nucleosides	Not Available	2-O-Methyladenosine	0.0005841	0.05545	1.7367	1.6266	1.0309	0.044	yes	up
metab_13918	Organic acids and derivatives	Carboxylic acids and derivatives	Amino acids, peptides, and analogues	Tetrahydrodipicolinate	0.02081	0.2853	1.7356	1.6925	1.108	0.1479	yes	up
metab_1898	Organic oxygen compounds	Organooxygen compounds	Carbonyl compounds	(Z)-3-Oxo-2-(2-Pentenyl)-1-Cyclopenteneacetic Acid	0.00663	0.1759	1.7309	1.674	1.0566	0.0794	yes	up
metab_9433	Phenylpropanoids and polyketides	Isoflavonoids	Not Available	(-)-Medicarpin	0.02179	0.2925	1.7289	1.8586	1.0599	0.084	yes	up
metab_937	-	-	-	3-Cyclopropyl-6-Pyrrolidin-1-Yl-[1,2,4]Triazolo[4,3-B]Pyridazine	0.01141	0.2217	1.7284	1.6093	1.0471	0.0665	yes	up
metab_13794	-	-	-	Spongothymidine	0.0005872	0.05545	1.7176	1.6097	1.0351	0.0497	yes	up
metab_7445	Nucleosides, nucleotides, and analogues	Purine nucleotides	Cyclic purine nucleotides	3',5'-Cyclic Gmp	0.01387	0.2414	1.6961	1.6228	0.9642	-0.0525	yes	down
metab_7322	Organic oxygen compounds	Organooxygen compounds	Carbohydrates and carbohydrate conjugates	Pseudouridine 5'-Phosphate	0.02406	0.3061	1.6922	1.634	0.9606	-0.0581	yes	down
metab_13912	Nucleosides, nucleotides, and analogues	Purine nucleotides	Purine nucleotide sugars	Gdp-D-Rhamnose	0.03412	0.3439	1.6888	1.6181	0.9542	-0.0676	yes	down
metab_13727	Nucleosides, nucleotides, and analogues	Purine nucleosides	Not Available	3'-O-Methylguanosine	0.0005638	0.05409	1.6817	1.5693	1.0308	0.0437	yes	up
metab_4848	Lipids and lipid-like molecules	Fatty Acyls	Fatty amides	5-((6-((Aminomethyl)Amino)-1-Oxohexyl)Amino)Pentanoic Acid	0.03911	0.3616	1.6748	1.6967	1.0776	0.1078	yes	up
metab_12495	Phenylpropanoids and polyketides	Flavonoids	Flavans	Eriodictyol	0.006433	0.1726	1.6391	1.6526	1.0576	0.0808	yes	up
metab_1365	-	-	-	Thr Glu Ile	0.01035	0.2112	1.6383	1.5753	1.0489	0.0689	yes	up
metab_4485	-	-	-	2-Norbornene-5,6-Dicarboxylic Anhydride	0.02347	0.3042	1.6349	1.567	1.0487	0.0686	yes	up
metab_8367	Benzenoids	Benzene and substituted derivatives	Biphenyls and derivatives	Sacubitrilat	0.009473	0.2042	1.6221	1.5131	0.9625	-0.0551	yes	down
metab_1663	Organic oxygen compounds	Organooxygen compounds	Carbonyl compounds	Embelin	0.03676	0.3553	1.613	1.6465	0.9394	-0.0902	yes	down
metab_4396	Organoheterocyclic compounds	Isobenzofurans	Not Available	Ligustilide	0.02867	0.3256	1.6023	1.5347	1.0566	0.0795	yes	up
metab_9285	Lipids and lipid-like molecules	Fatty Acyls	Fatty acids and conjugates	Octanoic Acid	0.005447	0.1621	1.5961	1.5335	1.0431	0.0609	yes	up
metab_6844	Lipids and lipid-like molecules	Glycerophospholipids	Glycerophosphates	Glycerol 3-Phosphate	0.005536	0.1627	1.5881	1.524	0.9618	-0.0561	yes	down
metab_1700	-	-	-	1-[2-(Hydroxymethyl)Pyrrolidin-1-Yl]-2-Methyldec-8-Ene-1,3-Dione	0.0142	0.2444	1.5862	1.5332	1.0434	0.0613	yes	up
metab_7497	Nucleosides, nucleotides, and analogues	Purine nucleotides	Purine ribonucleotides	5'-Guanylic Acid	0.02754	0.3222	1.5823	1.4967	0.963	-0.0544	yes	down
metab_4218	Lipids and lipid-like molecules	Fatty Acyls	Eicosanoids	Mg(0:0/Pge2/0:0)	0.04665	0.3799	1.5801	1.5207	1.0503	0.0708	yes	up
metab_4436	Phenylpropanoids and polyketides	Coumarins and derivatives	Furanocoumarins	Aflatoxin Q1	0.03616	0.3553	1.5671	1.4824	1.0504	0.071	yes	up
metab_13906	Organic oxygen compounds	Organooxygen compounds	Carbohydrates and carbohydrate conjugates	Fructose Lactate	0.0346	0.346	1.5598	1.4964	0.9557	-0.0654	yes	down
metab_1334	Organic oxygen compounds	Organooxygen compounds	Carbohydrates and carbohydrate conjugates	Tuliposide A	0.01649	0.261	1.5554	1.4637	1.0374	0.0529	yes	up
metab_12682	Lipids and lipid-like molecules	Steroids and steroid derivatives	Steroid lactones	(14Alpha,17Beta,20S,22R)-14,20-Epoxy-17-Hydroxy-1-Oxowitha-3,5,24-Trienolide	0.002193	0.1052	1.5493	1.5008	1.0355	0.0504	yes	up
metab_13564	Organic acids and derivatives	Carboxylic acids and derivatives	Amino acids, peptides, and analogues	2,4-Thiazolidinedicarboxylic Acid, 2-Methyl-	0.02515	0.3115	1.5332	1.5158	0.9522	-0.0707	yes	down
metab_14522	-	-	-	D-Galactose 1-Phosphate	0.01376	0.2399	1.5319	1.4884	0.9661	-0.0497	yes	down
metab_4990	-	-	-	Gln Glu Ile	0.0009936	0.07178	1.5314	1.4752	1.0335	0.0476	yes	up
metab_7403	Organic acids and derivatives	Carboxylic acids and derivatives	Amino acids, peptides, and analogues	Gamma-Glutamyl-Beta-Cyanoalanine	0.001242	0.08005	1.5276	1.4248	1.0338	0.0479	yes	up
metab_761	-	-	-	Dl-4-Hydroxyphenyllactic Acid	0.004498	0.1454	1.5245	1.4924	1.0427	0.0603	yes	up
metab_8113	Organic acids and derivatives	Carboxylic acids and derivatives	Amino acids, peptides, and analogues	(1S,2S,3S,4R)-3-(1-Acetamido-2-Ethylbutyl)-4-(Diaminomethylideneamino)-2-Hydroxycyclopentane-1-Carboxylic Acid	0.001262	0.08049	1.5243	1.5037	1.0322	0.0458	yes	up
metab_1560	Lipids and lipid-like molecules	Fatty Acyls	Fatty acid esters	(6E,10E)-3-Hydroxydodeca-6,10-Dienoylcarnitine	0.04691	0.3814	1.523	1.4672	1.0436	0.0616	yes	up
metab_14528	Organic oxygen compounds	Organooxygen compounds	Carbohydrates and carbohydrate conjugates	Alpha-D-Glucose	0.03964	0.3616	1.5105	1.3787	1.0307	0.0437	yes	up
metab_13895	Organic acids and derivatives	Carboxylic acids and derivatives	Amino acids, peptides, and analogues	Ramiprilat	0.001866	0.09604	1.5033	1.4536	1.0336	0.0477	yes	up
metab_9431	Organoheterocyclic compounds	Benzofurans	Not Available	Loliolide	0.007049	0.1797	1.4904	1.508	1.0359	0.0508	yes	up
metab_2874	Not Available	Not Available	Not Available	Pa(16:1(9Z)/18:1(12Z)-2Oh(9,10))	0.0001854	0.02906	1.4886	1.4531	0.9737	-0.0385	yes	down
metab_2074	-	-	-	Isotectorigenin, 7-Methyl Ether	0.01904	0.2734	1.4882	1.4293	1.042	0.0594	yes	up
metab_11255	Organic oxygen compounds	Organooxygen compounds	Carbonyl compounds	1,1,1-Trifluoroheptadecan-2-One	0.0423	0.3682	1.4877	1.4762	0.9531	-0.0693	yes	down
metab_1566	-	-	-	Gly Val Phe	0.009825	0.2071	1.4865	1.4497	1.0377	0.0534	yes	up
metab_7813	Organic oxygen compounds	Organooxygen compounds	Carbonyl compounds	3-Dehydroshikimate	0.04662	0.3799	1.4853	1.4632	1.0642	0.0898	yes	up
metab_13993	Organic acids and derivatives	Carboxylic acids and derivatives	Tricarboxylic acids and derivatives	Aconitic Acid	0.01978	0.2771	1.4844	1.4593	0.9705	-0.0431	yes	down
metab_4342	Phenylpropanoids and polyketides	Linear 1,3-diarylpropanoids	Cinnamylphenols	2'-O-Methylisoliquiritigenin	0.04927	0.3869	1.4668	1.5953	1.0509	0.0716	yes	up
metab_1361	Organic acids and derivatives	Carboxylic acids and derivatives	Amino acids, peptides, and analogues	Lisinopril	0.006873	0.1785	1.4464	1.4821	1.0399	0.0565	yes	up
metab_2848	Lipids and lipid-like molecules	Fatty Acyls	Fatty alcohols	Octadecanol	0.02747	0.322	1.4443	1.3691	0.9641	-0.0527	yes	down
metab_5127	Nucleosides, nucleotides, and analogues	Pyrimidine nucleosides	Pyrimidine 2''-deoxyribonucleosides	Thymidine	0.001507	0.08688	1.4368	1.393	1.0301	0.0428	yes	up
metab_7554	Lipids and lipid-like molecules	Fatty Acyls	Fatty acids and conjugates	Citraconic Acid	0.02029	0.2806	1.4355	1.3536	1.0406	0.0574	yes	up
metab_13340	Lipids and lipid-like molecules	Prenol lipids	Sesquiterpenoids	Farnesylcysteine	0.00408	0.1416	1.4316	1.319	1.0271	0.0386	yes	up
metab_8677	Lipids and lipid-like molecules	Glycerophospholipids	Glycerophosphates	Lysopa(P-16:0/0:0)	0.0004722	0.04968	1.429	1.3962	1.0267	0.0381	yes	up
metab_8704	Organic acids and derivatives	Carboxylic acids and derivatives	Amino acids, peptides, and analogues	Glutamine Lactate	0.00499	0.1534	1.4284	1.4034	1.0321	0.0455	yes	up
metab_13863	Nucleosides, nucleotides, and analogues	Purine nucleosides	Purine 2''-deoxyribonucleosides	Deoxyguanosine	0.004132	0.142	1.4239	1.3664	1.0227	0.0324	yes	up
metab_1642	Organic acids and derivatives	Vinylogous acids	Not Available	Trinexapac-Ethyl	0.03895	0.3609	1.4202	1.4751	0.9479	-0.0773	yes	down
metab_1161	Organic acids and derivatives	Carboxylic acids and derivatives	Amino acids, peptides, and analogues	Homomethionine	0.001372	0.08351	1.4184	1.3713	1.0309	0.0439	yes	up
metab_619	Nucleosides, nucleotides, and analogues	Pyrimidine nucleosides	Not Available	Cytarabine	0.003998	0.1404	1.4097	1.3086	1.0238	0.0339	yes	up
metab_13312	Alkaloids and derivatives	Cinchona alkaloids	Not Available	(2R,4S,5R)-5-Ethyl-2-[(S)-Hydroxy-(6-Methoxyquinolin-4-Yl)Methyl]-1-Azabicyclo[2.2.2]Octan-5-Ol	0.007722	0.1874	1.4062	1.386	1.0342	0.0485	yes	up
metab_4383	-	-	-	6,2'-Dihydroxyflavanone	0.02591	0.3158	1.4021	1.4243	1.0458	0.0646	yes	up
metab_12231	Phenylpropanoids and polyketides	Isoflavonoids	Furanoisoflavonoids	Pisatin	0.02249	0.2996	1.3994	1.2937	0.966	-0.0499	yes	down
metab_7096	Organic acids and derivatives	Carboxylic acids and derivatives	Carboxylic acids	3-Iodopropanoic Acid	0.0101	0.2103	1.3982	1.3049	0.9702	-0.0437	yes	down
metab_842	Lipids and lipid-like molecules	Fatty Acyls	Fatty acids and conjugates	Valeric Acid	0.003554	0.1324	1.3904	1.349	1.0211	0.0302	yes	up
metab_1240	-	-	-	His Val Ile	0.005974	0.1679	1.3851	1.387	1.032	0.0454	yes	up
metab_5005	-	-	-	Gln Asp Leu	0.02021	0.2799	1.3819	1.3211	1.0301	0.0428	yes	up
metab_7550	Nucleosides, nucleotides, and analogues	Nucleoside and nucleotide analogues	Not Available	Pseudouridine	0.004194	0.1425	1.376	1.3028	1.0232	0.033	yes	up
metab_7431	Organic acids and derivatives	Hydroxy acids and derivatives	Medium-chain hydroxy acids and derivatives	5-Keto-D-Gluconate	0.007553	0.1856	1.3706	1.2948	1.0339	0.0481	yes	up
metab_11667	Alkaloids and derivatives	Cytochalasans	Cytochalasins	Dihydrocytochalasin B	0.04798	0.3843	1.3654	1.2546	0.9733	-0.039	yes	down
metab_8984	Phenylpropanoids and polyketides	Flavonoids	Flavans	Norartocarpanone	0.04635	0.3798	1.3651	1.3583	1.0476	0.0671	yes	up
metab_630	Organoheterocyclic compounds	Diazines	Pyrimidines and pyrimidine derivatives	Cytosine	0.003117	0.125	1.3418	1.2537	1.0215	0.0307	yes	up
metab_5129	-	-	-	N-(4-Fluoro-3-Methylphenyl)-2,4-Dimethyl-1,3-Thiazole-5-Carboxamide	0.01715	0.2636	1.3283	1.2992	1.0311	0.0442	yes	up
metab_5462	-	-	-	Isocytosine	0.0009461	0.07114	1.3274	1.2532	1.0188	0.0269	yes	up
metab_1164	Organoheterocyclic compounds	Diazines	Pyrimidines and pyrimidine derivatives	Thymine	0.001696	0.09253	1.3219	1.2732	1.0212	0.0302	yes	up
metab_632	Organic acids and derivatives	Keto acids and derivatives	Medium-chain keto acids and derivatives	(S)-5-Amino-3-Oxohexanoate	0.004493	0.1454	1.3201	1.2872	1.0306	0.0435	yes	up
metab_12444	Lipids and lipid-like molecules	Fatty Acyls	Fatty acids and conjugates	Suberic Acid	0.001731	0.09265	1.3174	1.2374	1.0227	0.0324	yes	up
metab_13567	Organic acids and derivatives	Carboxylic acids and derivatives	Amino acids, peptides, and analogues	Lysylhydroxyproline	0.001326	0.08285	1.3167	1.2527	1.0233	0.0333	yes	up
metab_7846	Benzenoids	Benzene and substituted derivatives	Benzoic acids and derivatives	Labetalol	0.009325	0.2042	1.311	1.2275	1.024	0.0342	yes	up
metab_4968	-	-	-	1-[3-[[6-Methyl-2-(4-Nitropyrazol-1-Yl)Pyrimidin-4-Yl]Amino]Phenyl]Ethanol	0.03251	0.3382	1.308	1.3783	0.96	-0.0588	yes	down
metab_14317	Organic oxygen compounds	Organooxygen compounds	Carbohydrates and carbohydrate conjugates	Ethyl Glucuronide	0.01713	0.2636	1.3045	1.2425	1.0388	0.0549	yes	up
metab_13525	Organic acids and derivatives	Carboxylic acids and derivatives	Amino acids, peptides, and analogues	(2S,3As,6As)-1-[(2R)-2-Carboxy-2-[[(2S)-1-Ethoxy-1-Oxo-4-Phenylbutan-2-Yl]Amino]Acetyl]-3,3A,4,5,6,6A-Hexahydro-2H-Cyclopenta[B]Pyrrole-2-Carboxylic Acid	0.002273	0.1069	1.3044	1.299	1.0255	0.0364	yes	up
metab_13122	Organoheterocyclic compounds	Piperidines	Benzylpiperidines	Lavoltidine	0.003577	0.1324	1.3013	1.2763	1.0278	0.0395	yes	up
metab_5047	-	-	-	Asn Thr Ile	0.005284	0.1592	1.2963	1.2354	1.0266	0.0378	yes	up
metab_1031	-	-	-	Leu Glu Ser	0.008873	0.1995	1.2831	1.2281	1.0277	0.0394	yes	up
metab_8071	Nucleosides, nucleotides, and analogues	Purine nucleosides	Not Available	Ab-Meca	0.01086	0.2166	1.2739	1.1841	1.0239	0.0341	yes	up
metab_5138	Nucleosides, nucleotides, and analogues	Purine nucleosides	Not Available	1-Methylguanosine	0.00706	0.1797	1.2731	1.1649	1.0207	0.0295	yes	up
metab_7489	Benzenoids	Phenols	Benzenediols	Benzamide, 3-(3-((2-(3,4-Dihydroxyphenyl)Ethyl)Amino)Butyl)-	0.007475	0.1844	1.2725	1.2314	1.0255	0.0364	yes	up
metab_5020	-	-	-	Ser Thr Leu	0.003035	0.124	1.2699	1.2206	1.0254	0.0362	yes	up
metab_1449	Organic acids and derivatives	Carboxylic acids and derivatives	Amino acids, peptides, and analogues	Aspartyl-Isoleucine	0.009596	0.2049	1.2696	1.2953	0.9675	-0.0476	yes	down
metab_5568	Organic oxygen compounds	Organooxygen compounds	Carbohydrates and carbohydrate conjugates	1-[(2R,3R,4S,5R)-3,4-Dihydroxy-5-(Hydroxymethyl)Oxolan-2-Yl]Oxypyrimidin-2-One	0.01067	0.2151	1.2618	1.1645	1.0251	0.0358	yes	up
metab_14002	Nucleosides, nucleotides, and analogues	Pyrimidine nucleosides	Not Available	Uridine	0.002744	0.1171	1.2598	1.1658	1.015	0.0215	yes	up
metab_14138	Organoheterocyclic compounds	Imidazopyrimidines	Purines and purine derivatives	Adenine	0.0009436	0.07114	1.2576	1.1735	1.0179	0.0257	yes	up
metab_5379	Organoheterocyclic compounds	Diazines	Pyrimidines and pyrimidine derivatives	5-Methylcytosine	0.00598	0.1679	1.2562	1.2236	1.0231	0.033	yes	up
metab_8062	Organic acids and derivatives	Hydroxy acids and derivatives	Medium-chain hydroxy acids and derivatives	Pravastatin	0.001362	0.08331	1.2519	1.2125	1.0213	0.0305	yes	up
metab_14008	Organic acids and derivatives	Carboxylic acids and derivatives	Amino acids, peptides, and analogues	O-Succinyl-L-Homoserine	0.004382	0.144	1.2467	1.1549	1.0219	0.0313	yes	up
metab_600	Organic acids and derivatives	Carboxylic acids and derivatives	Amino acids, peptides, and analogues	Proline Betaine	0.003901	0.1392	1.2395	1.1946	1.0164	0.0234	yes	up
metab_5421	Benzenoids	Benzene and substituted derivatives	Phenethylamines	Methyldopate	0.008251	0.1939	1.2387	1.1558	1.0188	0.0269	yes	up
metab_14003	Organoheterocyclic compounds	Pyrans	Not Available	5-Formyl-2H-Pyran-6-Carboxamide	0.002258	0.1066	1.2377	1.1505	1.0202	0.0289	yes	up
metab_13496	Benzenoids	Benzene and substituted derivatives	Benzoic acids and derivatives	Methyl 3-Benzoyloxy-8-(3-Hydroxypropyl)-8-Azabicyclo[3.2.1]Octane-2-Carboxylate	0.006072	0.1685	1.2349	1.1366	1.0193	0.0276	yes	up
metab_7362	Organoheterocyclic compounds	Azolidines	Oxazolidines	Dimethadione	0.002707	0.1171	1.2165	1.1302	1.0201	0.0287	yes	up
metab_891	Nucleosides, nucleotides, and analogues	Pyrimidine nucleosides	Pyrimidine 2''-deoxyribonucleosides	5-Methyldeoxycytidine	0.01877	0.2733	1.2132	1.1896	1.0275	0.0392	yes	up
metab_7067	-	-	-	Uridine Monophosphate (Ump)	0.03714	0.3559	1.213	1.1672	0.9731	-0.0394	yes	down
metab_4350	Lipids and lipid-like molecules	Fatty Acyls	Fatty acids and conjugates	3,4-Methylenesebacic Acid	0.02017	0.2797	1.2115	1.172	1.0301	0.0428	yes	up
metab_8123	Organoheterocyclic compounds	Isoquinolines and derivatives	Benzylisoquinolines	(R)-Laudanidine	0.002633	0.1156	1.2112	1.1897	1.024	0.0342	yes	up
metab_7736	Nucleosides, nucleotides, and analogues	5''-deoxyribonucleosides	Not Available	Abeado	0.006876	0.1785	1.2071	1.1601	1.0226	0.0323	yes	up
metab_796	Organoheterocyclic compounds	Imidazopyrimidines	Purines and purine derivatives	6-Hydroxy-2-Aminopurine	0.01601	0.2586	1.2038	1.1622	1.0183	0.0262	yes	up
metab_11994	Organoheterocyclic compounds	Naphthofurans	Not Available	Marasmal	0.01174	0.2251	1.1982	1.2146	0.9766	-0.0341	yes	down
metab_636	Organoheterocyclic compounds	Imidazopyrimidines	Purines and purine derivatives	8-Hydroxyadenine	0.02281	0.3019	1.1974	1.1511	1.0206	0.0294	yes	up
metab_13563	-	-	-	N,N-Dimethylguanosine	0.01691	0.2635	1.1942	1.0838	1.021	0.0299	yes	up
metab_9286	Lipids and lipid-like molecules	Fatty Acyls	Fatty acids and conjugates	Azelaic Acid	0.03532	0.3501	1.1862	1.0953	1.019	0.0271	yes	up
metab_14653	Organic acids and derivatives	Carboxylic acids and derivatives	Amino acids, peptides, and analogues	3-Cyano-L-Alanine	0.02571	0.3149	1.168	1.1655	1.0239	0.0341	yes	up
metab_7373	Lipids and lipid-like molecules	Fatty Acyls	Fatty acids and conjugates	Itaconic Acid	0.02909	0.326	1.1667	1.155	0.9782	-0.0318	yes	down
metab_12828	Lipids and lipid-like molecules	Fatty Acyls	Fatty acids and conjugates	3-(1-Hydroxymethyl-1-Propenyl)Pentanedioic Acid	0.04287	0.369	1.1662	1.0564	1.0271	0.0386	yes	up
metab_5174	-	-	-	Leu Ala Glu	0.02342	0.3042	1.16	1.1527	1.0269	0.0383	yes	up
metab_814	Nucleosides, nucleotides, and analogues	Pyrimidine nucleosides	Pyrimidine 2''-deoxyribonucleosides	2'-Deoxycytidine	0.01128	0.2206	1.1599	1.1216	1.0247	0.0352	yes	up
metab_6729	Organic acids and derivatives	Organic carbonic acids and derivatives	Ureas	3-Ureidopropionic Acid	0.02918	0.3264	1.1588	1.1578	1.0199	0.0284	yes	up
metab_919	Nucleosides, nucleotides, and analogues	Pyrimidine nucleosides	Not Available	1-[(2R,3S,5R)-3,4-Dihydroxy-5-(Hydroxymethyl)Oxolan-2-Yl]Pyrimidine-2,4-Dione	0.004207	0.1425	1.1525	1.0699	1.0152	0.0218	yes	up
metab_8341	Organic oxygen compounds	Organooxygen compounds	Ethers	Tetraethylene Glycol	0.008307	0.1939	1.1497	1.1547	1.0219	0.0313	yes	up
metab_4992	-	-	-	Ser Glu Leu	0.02831	0.3242	1.1474	1.0678	1.021	0.03	yes	up
metab_633	Organoheterocyclic compounds	Pyrazolopyrimidines	Pyrazolo[3,4-d]pyrimidines	1H-Pyrazolo[3,4-D]Pyrimidin-4-Amine	0.002739	0.1171	1.1412	1.0749	1.014	0.0201	yes	up
metab_7014	-	-	-	D-Lyxose	0.04929	0.3869	1.1392	1.1181	1.0258	0.0367	yes	up
metab_2927	Organic oxygen compounds	Organooxygen compounds	Carbonyl compounds	2-Cyclopenten-1-One	0.003625	0.1327	1.1323	1.1094	1.0238	0.034	yes	up
metab_14005	Nucleosides, nucleotides, and analogues	Pyrimidine nucleotides	Pyrimidine ribonucleotides	Uridine 5'-Monophosphate	0.04511	0.3775	1.1273	1.1164	0.9808	-0.0279	yes	down
metab_10339	-	-	-	Cer[As](D34:1)	0.0277	0.323	1.1226	1.1275	1.0196	0.0279	yes	up
metab_8442	Lipids and lipid-like molecules	Fatty Acyls	Fatty acids and conjugates	3-Methyladipic Acid	0.01301	0.235	1.1146	1.0339	1.0196	0.028	yes	up
metab_13337	-	-	-	Gly Val Ala Asp Val	0.002464	0.1119	1.1097	1.0692	1.0168	0.024	yes	up
metab_8702	Benzenoids	Phenanthrenes and derivatives	Not Available	Butorphanol	0.03965	0.3616	1.1027	1.024	1.0197	0.0282	yes	up
metab_1994	Benzenoids	Phenols	1-hydroxy-2-unsubstituted benzenoids	4-Hydroxyphenylglycolic Acid	0.03782	0.3577	1.0992	1.0975	1.0287	0.0408	yes	up
metab_12768	Benzenoids	Benzene and substituted derivatives	Phenylpropanes	Suloctidil	0.02033	0.2809	1.0947	1.0332	1.0185	0.0265	yes	up
metab_13385	Phenylpropanoids and polyketides	Macrolides and analogues	Not Available	Integerrimine	0.03409	0.3439	1.0942	0.9888	1.0181	0.0259	yes	up
metab_6728	Lipids and lipid-like molecules	Fatty Acyls	Fatty acids and conjugates	Maleamic Acid	0.03827	0.3594	1.0928	1.0913	1.0228	0.0325	yes	up
metab_2881	Lipids and lipid-like molecules	Fatty Acyls	Fatty acids and conjugates	Dg(9D3/9D3/0:0)	0.03412	0.3439	1.0914	1.0938	1.0184	0.0263	yes	up
metab_8390	Organic acids and derivatives	Carboxylic acids and derivatives	Amino acids, peptides, and analogues	Zabicipril	0.01562	0.2559	1.0898	1.1129	1.0194	0.0277	yes	up
metab_1011	-	-	-	Ala Ile Asn	0.009414	0.2042	1.0843	1.0664	1.0202	0.0288	yes	up
metab_9359	Phenylpropanoids and polyketides	Flavonoids	Flavans	Liquiritigenin	0.02975	0.3279	1.0802	1.116	1.0235	0.0335	yes	up
metab_11077	Lipids and lipid-like molecules	Sphingolipids	Ceramides	Cer(D16:1/16:0)	0.009998	0.2096	1.0777	1.0505	1.0158	0.0226	yes	up
metab_1727	-	-	-	Asp Ile Ile	0.04454	0.3759	1.0757	0.9867	1.0204	0.0292	yes	up
metab_1234	Nucleosides, nucleotides, and analogues	Purine nucleosides	Not Available	N2,N2-Dimethylguanosine	0.02373	0.3049	1.0694	0.9655	1.0169	0.0241	yes	up
metab_2893	-	-	-	Erucamide	0.03877	0.3609	1.0602	1.0938	1.0173	0.0247	yes	up
metab_7662	Organoheterocyclic compounds	Oxazinanes	Morpholines	3-Fluorophenmetrazine	0.003052	0.124	1.0556	1.0254	1.0151	0.0216	yes	up
metab_4214	-	-	-	Meprylcaine	0.04819	0.3847	1.0528	1.0971	0.9718	-0.0413	yes	down
metab_4354	Lipids and lipid-like molecules	Prenol lipids	Sesquiterpenoids	Dihydrophaseic Acid	0.02924	0.3268	1.0505	1.0016	0.9784	-0.0316	yes	down
metab_1328	-	-	-	Thr Gly Ile	0.01959	0.277	1.0501	1.0073	1.0211	0.0302	yes	up
metab_6655	Organic acids and derivatives	Carboxylic acids and derivatives	Amino acids, peptides, and analogues	Dl-Arginine	0.03666	0.3553	1.0496	0.9734	1.0183	0.0261	yes	up
metab_1237	-	-	-	7-Ethylguanine	0.02732	0.3217	1.0376	0.9375	1.017	0.0244	yes	up
metab_1833	Organoheterocyclic compounds	Pteridines and derivatives	Alloxazines and isoalloxazines	Lumichrome	0.007303	0.1832	1.0357	0.9531	1.0164	0.0234	yes	up
metab_4995	-	-	-	Ala Asp Ile	0.04715	0.3816	1.0352	0.9509	1.0194	0.0277	yes	up
metab_4772	-	-	-	Val Asp Leu	0.02948	0.3273	1.0338	0.9832	1.0188	0.0269	yes	up
metab_1326	-	-	-	Ala Glu Ile	0.03247	0.3382	1.031	0.9938	1.0182	0.026	yes	up
metab_5355	Organoheterocyclic compounds	Diazines	Pyrimidines and pyrimidine derivatives	Uracil	0.003657	0.1329	1.0256	0.9531	1.012	0.0172	yes	up
metab_5825	Organic acids and derivatives	Carboxylic acids and derivatives	Amino acids, peptides, and analogues	Sarcosine	0.04841	0.3848	1.0232	0.981	1.0193	0.0275	yes	up
metab_1472	-	-	-	Ser Val Leu	0.01608	0.2587	1.0232	1.0355	1.0194	0.0278	yes	up
metab_13371	Alkaloids and derivatives	Morphinans	Not Available	Dihydroneopine	0.004375	0.144	1.0229	1.0073	1.0167	0.0239	yes	up
metab_1427	-	-	-	Leu Gly Val	0.03885	0.3609	1.0175	0.9507	1.0196	0.028	yes	up
metab_8901	-	-	-	Gly Leu Phe	0.0417	0.367	1.0129	0.9449	1.0182	0.0261	yes	up
metab_13554	Benzenoids	Phenols	Tyrosols and derivatives	Metoprolol	0.003244	0.1285	1.0085	0.9916	1.0147	0.021	yes	up
metab_1442	-	-	-	Gln Val Leu	0.02412	0.3061	1.0011	0.996	1.0186	0.0266	yes	up

## Sheet: Table S4C
Table S4C The DAMs in ACC1 vs NP group
Metab ID	HMDB Superclass	HMDB Class	HMDB Subclass	Metabolite	P_value	FDR	VIP_pred_OPLS-DA	VIP_PLS-DA	FC(ACC1/NP)	Log2FC(ACC1/NP)	Significant	Regulate
metab_8935	Organic acids and derivatives	Hydroxy acids and derivatives	Medium-chain hydroxy acids and derivatives	10-Hydroxydecanoic Acid	0.001919	0.04495	5.5646	5.3374	13.5556	3.7608	yes	up
metab_7386	Organic acids and derivatives	Carboxylic acids and derivatives	Amino acids, peptides, and analogues	(1R,4R,5S,6R)-4-Amino-2-Oxabicyclo[3.1.0]Hexane-4,6-Dicarboxylic Acid	8.152e-11	4.888e-07	4.7042	4.6559	1.5921	0.6709	yes	up
metab_5390	Organoheterocyclic compounds	Azoles	Pyrazoles	Antipyrine	7.681e-06	0.001245	4.6059	4.4881	2.0718	1.0509	yes	up
metab_1854	Phenylpropanoids and polyketides	Coumarins and derivatives	Furanocoumarins	Apiumoside	0.0001991	0.0109	4.5122	4.4393	1.7051	0.7699	yes	up
metab_11432	-	-	-	7-Hydroxy-3'-Methoxyflavone	5.453e-06	0.0009616	4.2399	4.1629	1.3713	0.4556	yes	up
metab_4478	Lipids and lipid-like molecules	Steroids and steroid derivatives	Steroidal glycosides	Estriol 3-Sulfate 16-Glucuronide	0.001227	0.03506	4.0269	3.9288	1.5689	0.6497	yes	up
metab_4526	Organic oxygen compounds	Organooxygen compounds	Carbohydrates and carbohydrate conjugates	Dide-O-Methyl-4-O-Alpha-D-Glucopyranosylsimmondsin	3.04e-05	0.003226	3.9166	3.8155	1.4184	0.5043	yes	up
metab_2622	-	-	-	Formononetin 7-O-Glucoside-6''-O-Malonate	0.0001218	0.007607	3.9005	3.8642	1.3272	0.4084	yes	up
metab_3755	-	-	-	6-Hydroxy-4'-Methoxyflavone	2.056e-05	0.002371	3.7649	3.6997	1.3728	0.4571	yes	up
metab_10037	Phenylpropanoids and polyketides	Flavonoids	Flavones	3,7,4'-Trihydroxyflavone	5.427e-06	0.0009616	3.734	3.6651	1.318	0.3984	yes	up
metab_8813	-	-	-	7,3'-Dihydroxyflavone	5.973e-06	0.001023	3.7194	3.6275	1.5047	0.5895	yes	up
metab_1817	Organic acids and derivatives	Carboxylic acids and derivatives	Amino acids, peptides, and analogues	Asp F I	5.454e-05	0.004774	3.6903	3.6052	1.361	0.4447	yes	up
metab_5030	Lipids and lipid-like molecules	Glycerolipids	Monoradylglycerols	1-O-Pentylglycerol	0.0004871	0.0201	3.5683	3.4952	1.4171	0.5029	yes	up
metab_4930	-	-	-	N-Octanoyl-Dl-Homoserine Lactone	6.313e-05	0.005215	3.5555	3.4888	1.3497	0.4327	yes	up
metab_1896	Organoheterocyclic compounds	Lactams	Beta lactams	Cefminox	6.787e-05	0.005355	3.4853	3.4196	1.3165	0.3967	yes	up
metab_8166	-	-	-	Ensulizole	0.01353	0.1274	3.4658	3.5373	1.433	0.5191	yes	up
metab_1845	Phenylpropanoids and polyketides	Flavonoids	Flavonoid glycosides	Poncirin	0.0001977	0.01087	3.3813	3.3233	1.3038	0.3827	yes	up
metab_10061	Benzenoids	Anthracenes	Anthraquinones	Hydroxyanthraquinone	1.944e-05	0.002332	3.3685	3.3156	1.2437	0.3146	yes	up
metab_4570	-	-	-	Chrysin-7-O-Glucuronide	0.005552	0.08189	3.3358	3.2472	1.4325	0.5185	yes	up
metab_1791	-	-	-	Isoflavone Base+1O,1Meo,O-Hex+C7H12No	0.0006306	0.02327	3.1746	3.0756	1.2616	0.3353	yes	up
metab_1848	Phenylpropanoids and polyketides	Flavonoids	O-methylated flavonoids	Tamarixetin	0.001401	0.03751	3.1243	3.0827	1.3431	0.4255	yes	up
metab_12240	-	-	-	Apigenin 7-Galacturonide	0.01597	0.1388	3.1204	3.0347	1.2873	0.3643	yes	up
metab_4835	Organic nitrogen compounds	Organonitrogen compounds	Quinonimines	Indophenol	0.008661	0.1019	3.0824	2.9715	1.3034	0.3823	yes	up
metab_3533	-	-	-	7-O-Methylchrysin	0.0001023	0.006775	3.08	3.0046	1.2149	0.2808	yes	up
metab_8236	Phenylpropanoids and polyketides	2-arylbenzofuran flavonoids	Not Available	Scorzonoside	0.007376	0.09413	3.0685	2.9567	1.257	0.33	yes	up
metab_4914	Lipids and lipid-like molecules	Fatty Acyls	Fatty acid esters	4-Hydroxyhexanoycarnitine	0.004414	0.07288	3.0654	3.0101	1.3031	0.3819	yes	up
metab_13989	Organoheterocyclic compounds	Dithiolanes	Lipoamides	Lipoamide	8.463e-07	0.0002819	3.0441	3.0156	1.1785	0.2369	yes	up
metab_7251	Organic acids and derivatives	Organic phosphoric acids and derivatives	Phosphate esters	Diethyl Hydrogen Phosphate	0.001297	0.03574	3.0105	3.0544	1.2212	0.2883	yes	up
metab_931	Organic acids and derivatives	Carboxylic acids and derivatives	Amino acids, peptides, and analogues	1-(Malonylamino)Cyclopropanecarboxylic Acid	4.918e-07	0.0001924	2.9639	2.9129	1.1358	0.1837	yes	up
metab_13588	Organic acids and derivatives	Carboxylic acids and derivatives	Amino acids, peptides, and analogues	3-(Aminomethyl)-5-Methylhexanoic Acid	0.01358	0.1274	2.9504	2.9434	1.3768	0.4613	yes	up
metab_9124	-	-	-	Methyl 2-(2,6-Dihydroxy-4-Methylbenzoyl)-3,5-Dihydroxybenzoate	0.0007005	0.0251	2.9068	2.8937	1.2312	0.3001	yes	up
metab_1458	Organoheterocyclic compounds	Indoles and derivatives	Indoles	Indole-3-Butyric Acid	0.01344	0.1271	2.898	2.7723	1.2901	0.3674	yes	up
metab_5236	Organic acids and derivatives	Carboxylic acids and derivatives	Amino acids, peptides, and analogues	4,5-Seco-Dopa	0.001069	0.03251	2.8887	2.8702	1.2455	0.3167	yes	up
metab_9815	Organic acids and derivatives	Carboxylic acids and derivatives	Tetracarboxylic acids and derivatives	2-((2-((Dimethoxyphosphorothioyl)Thio)-4-Ethoxy-4-Oxobutanoyl)Oxy)-2-Methylmalonic Acid	0.0008563	0.02844	2.8755	2.8635	1.1923	0.2538	yes	up
metab_4400	Lipids and lipid-like molecules	Prenol lipids	Monoterpenoids	1,5-Dimethyl-1-Vinyl-4-Hexenyl Acetate	0.001085	0.0327	2.862	2.9712	1.3153	0.3954	yes	up
metab_4724	Benzenoids	Phenols	4-alkoxyphenols	4-Hydroxy-Alprenolol	0.006478	0.08778	2.8545	2.7668	1.2956	0.3736	yes	up
metab_9701	Phenylpropanoids and polyketides	Flavonoids	Hydroxyflavonoids	Apigenidin	0.004521	0.07327	2.8539	2.7541	1.2279	0.2962	yes	up
metab_1619	Benzenoids	Phenol ethers	Not Available	Esmolol	0.008294	0.1003	2.8386	2.8309	1.2605	0.334	yes	up
metab_11294	-	-	-	7-Hydroxy-2'-Methoxyflavone	0.001246	0.03513	2.832	2.7275	1.2004	0.2635	yes	up
metab_1916	Lipids and lipid-like molecules	Prenol lipids	Sesquiterpenoids	Aflatoxin P1	0.002604	0.05499	2.8226	2.8106	1.2686	0.3433	yes	up
metab_8229	Organoheterocyclic compounds	Indoles and derivatives	Tryptamines and derivatives	Bufotenin	0.02282	0.1607	2.8189	2.7129	1.2306	0.2994	yes	up
metab_4964	Lipids and lipid-like molecules	Fatty Acyls	Fatty acid esters	3-Hydroxyhexanoylcarnitine	0.008111	0.09921	2.8159	2.7819	1.3021	0.3808	yes	up
metab_4377	Phenylpropanoids and polyketides	Coumarins and derivatives	Not Available	Capillarisin	0.0007808	0.02668	2.8021	2.7596	1.2417	0.3123	yes	up
metab_1863	-	-	-	Formononetin-7-O-Glucoside	3.452e-05	0.003508	2.8011	2.7401	1.1442	0.1944	yes	up
metab_13983	Organic acids and derivatives	Carboxylic acids and derivatives	Amino acids, peptides, and analogues	6-Oxopiperidine-2-Carboxylic Acid	2.59e-07	0.0001345	2.7975	2.7674	1.113	0.1545	yes	up
metab_12544	Organic acids and derivatives	Keto acids and derivatives	Medium-chain keto acids and derivatives	2-Keto-6-Acetamidocaproate	2.021e-05	0.002357	2.7958	2.7135	1.2292	0.2978	yes	up
metab_8714	-	-	-	Tanshinone Iia Sulfonate	0.005228	0.08008	2.7924	2.8247	1.2241	0.2917	yes	up
metab_1883	Organoheterocyclic compounds	Naphthopyrans	Not Available	Borapetoside	0.002697	0.05558	2.7875	2.6804	1.2225	0.2898	yes	up
metab_1459	Organic oxygen compounds	Organooxygen compounds	Carbohydrates and carbohydrate conjugates	Tyramine Glucuronide	0.01475	0.1332	2.7842	2.6741	1.2124	0.2779	yes	up
metab_6884	Organic acids and derivatives	Hydroxy acids and derivatives	Beta hydroxy acids and derivatives	3-Hydroxypyruvic Acid	0.01644	0.14	2.7821	2.6445	1.3641	0.448	yes	up
metab_12263	-	-	-	2',6-Dihydroxyflavanone	3.674e-05	0.003641	2.7296	2.6996	1.1417	0.1912	yes	up
metab_4173	Phenylpropanoids and polyketides	Coumarins and derivatives	Furanocoumarins	Isoimperatorin	4.252e-05	0.003983	2.7232	2.6868	1.1245	0.1692	yes	up
metab_13131	Alkaloids and derivatives	Harmala alkaloids	Not Available	Harmine	0.01218	0.122	2.7206	2.6235	1.2317	0.3006	yes	up
metab_1428	-	-	-	Triisopropanolamine	0.0002384	0.01259	2.7105	2.6802	1.1938	0.2556	yes	up
metab_8230	Organoheterocyclic compounds	Diazines	Pyrimidines and pyrimidine derivatives	5-Benzylacyclouridine	0.02285	0.1607	2.701	2.5951	1.1832	0.2427	yes	up
metab_1895	-	-	-	6'-Malonyl Ononin	2.813e-05	0.003012	2.6892	2.6388	1.1053	0.1444	yes	up
metab_9872	Benzenoids	Fluorenes	Not Available	Fluorenylmethyl Chloroformate	8.761e-05	0.006144	2.6677	2.6111	1.1529	0.2053	yes	up
metab_7289	Organoheterocyclic compounds	Naphthopyrans	Naphthopyranones	Cassiaside	0.004315	0.07189	2.6629	2.5662	1.1876	0.248	yes	up
metab_12241	Benzenoids	Benzene and substituted derivatives	Benzenesulfonyl compounds	4,4'-Sulfonyldiphenol	0.02699	0.1744	2.6627	2.7316	0.7225	-0.469	yes	down
metab_930	Organic acids and derivatives	Carboxylic acids and derivatives	Amino acids, peptides, and analogues	2-Aminomuconic Acid Semialdehyde	1.141e-07	7.202e-05	2.6598	2.6216	1.1132	0.1547	yes	up
metab_2648	Phenylpropanoids and polyketides	Linear 1,3-diarylpropanoids	Chalcones and dihydrochalcones	Avobenzone	0.01542	0.1354	2.6528	2.814	1.2513	0.3234	yes	up
metab_4383	-	-	-	6,2'-Dihydroxyflavanone	0.0005881	0.02225	2.6375	2.5703	1.1599	0.214	yes	up
metab_4834	Organic acids and derivatives	Carboxylic acids and derivatives	Amino acids, peptides, and analogues	Gamma-Glutamylphenylalanine	0.01639	0.14	2.6213	2.5151	1.1281	0.1739	yes	up
metab_4818	Lipids and lipid-like molecules	Fatty Acyls	Fatty acid esters	Dodec-7-Enedioylcarnitine	0.01248	0.1231	2.593	2.5363	1.2233	0.2908	yes	up
metab_852	Organoheterocyclic compounds	Furans	Furoic acid and derivatives	2,5-Furandicarboxylic Acid	0.01623	0.1399	2.5862	2.5516	0.8149	-0.2953	yes	down
metab_14080	Lipids and lipid-like molecules	Steroids and steroid derivatives	Hydroxysteroids	Galactinol	0.005354	0.08117	2.5754	2.5365	1.2054	0.2695	yes	up
metab_1115	Nucleosides, nucleotides, and analogues	Purine nucleotides	Purine ribonucleotides	Biotinyl-5'-Amp	0.02833	0.1792	2.5564	2.5237	1.1941	0.256	yes	up
metab_11707	-	-	-	(2E)-2-[Hydroxy(Phenyl)Methylidene]-6-Methoxy-1-Benzofuran-3-One	9.888e-06	0.001482	2.5543	2.5112	1.0992	0.1364	yes	up
metab_1813	Phenylpropanoids and polyketides	Flavonoids	Flavonoid glycosides	Phloretin 2'-O-Glucuronide	0.005243	0.0801	2.5107	2.3967	1.199	0.2618	yes	up
metab_1630	-	-	-	3-Desoxy-3,4-Methylenedioxy Pyrovalerone	0.03648	0.201	2.5036	2.4422	1.2299	0.2985	yes	up
metab_2119	Benzenoids	Benzene and substituted derivatives	Benzoyl derivatives	4-Methoxybenzaldehyde	3.534e-05	0.003561	2.497	2.4666	1.1271	0.1726	yes	up
metab_2736	Phenylpropanoids and polyketides	Isoflavonoids	O-methylated isoflavonoids	Formononetin	3.643e-05	0.00364	2.497	2.4559	1.0752	0.1046	yes	up
metab_428	-	-	-	Aceclidine	0.01203	0.1212	2.4909	2.4354	1.1871	0.2474	yes	up
metab_9254	Lipids and lipid-like molecules	Fatty Acyls	Fatty acids and conjugates	Undecylenic Acid	0.01171	0.1197	2.4771	2.3581	1.1376	0.186	yes	up
metab_9657	-	-	-	7-Hydroxy-3(4-Methoxyphenyl)Coumarin	5.564e-05	0.0048	2.4768	2.4419	1.1275	0.1732	yes	up
metab_14317	Organic oxygen compounds	Organooxygen compounds	Carbohydrates and carbohydrate conjugates	Ethyl Glucuronide	1.586e-05	0.002006	2.4719	2.404	1.1458	0.1964	yes	up
metab_12067	Phenylpropanoids and polyketides	Flavonoids	Flavonoid glycosides	Neolicuroside	0.01677	0.1419	2.4714	2.3904	1.2104	0.2755	yes	up
metab_11378	Benzenoids	Anthracenes	Anthraquinones	Rubiadin	0.0004041	0.01802	2.4397	2.409	1.1065	0.146	yes	up
metab_12034	Phenylpropanoids and polyketides	Coumarins and derivatives	Furanocoumarins	(3S,7R)-16-Hydroxy-11-Methoxy-6,8,19-Trioxapentacyclo[10.7.0.02,9.03,7.013,17]Nonadeca-1,4,9,11,13(17)-Pentaen-18-One	0.0001373	0.0084	2.4347	2.3847	1.1268	0.1722	yes	up
metab_11303	-	-	-	7-Hydroxy-2'-Methoxyisoflavone	7.221e-06	0.001186	2.413	2.3718	1.0648	0.0905	yes	up
metab_3445	-	-	-	15-Methylprostaglandin E1	0.001556	0.04004	2.4125	2.3804	1.1223	0.1665	yes	up
metab_11305	Phenylpropanoids and polyketides	Flavonoids	Flavans	(2R,3R)-Pinobanksin	4.482e-06	0.0008679	2.4045	2.3645	1.0866	0.1198	yes	up
metab_4334	Phenylpropanoids and polyketides	Isoflavonoids	Furanoisoflavonoids	Medicarpin 3-O-(6'-Malonylglucoside)	0.03547	0.1988	2.4025	2.2723	1.1813	0.2404	yes	up
metab_12138	Benzenoids	Benzene and substituted derivatives	Diphenylethers	Fenoprofen	2.807e-05	0.003012	2.4013	2.3372	1.1243	0.169	yes	up
metab_9521	-	-	-	2'-Methoxyformonetin	0.0002984	0.01485	2.4008	2.3583	1.1141	0.1559	yes	up
metab_1618	Lipids and lipid-like molecules	Prenol lipids	Diterpenoids	(3S,5R,6R)-3,5-Dihydroxy-6,7-Didehydro-5,6-Dihydro-12'-Apo-Beta-Caroten-12'-Al	0.00565	0.08243	2.3831	2.3534	1.1308	0.1774	yes	up
metab_4323	Phenylpropanoids and polyketides	Flavonoids	Flavonoid glycosides	Malonylglycitin	0.007519	0.09526	2.3704	2.2979	1.1743	0.2318	yes	up
metab_1381	Lignans, neolignans and related compounds	Lignan glycosides	Not Available	Arctiin	0.0003787	0.0172	2.3501	2.2817	1.124	0.1686	yes	up
metab_8986	Organoheterocyclic compounds	Benzopyrans	1-benzopyrans	Baicalein	0.0001043	0.006863	2.3415	2.3045	1.1504	0.2022	yes	up
metab_9316	Phenylpropanoids and polyketides	Isoflavonoids	Isoflavonoid C-glycosides	Puerarin	0.0002549	0.01323	2.3407	2.2533	1.1072	0.1469	yes	up
metab_4569	Organic oxygen compounds	Organooxygen compounds	Carbonyl compounds	Adlupulone	0.02779	0.1772	2.3352	2.3612	1.2071	0.2716	yes	up
metab_11508	Not Available	Not Available	Not Available	Pip(18:1(11Z)/20:4(5Z,8Z,11Z,14Z)-Oh(16R))	0.02805	0.1781	2.33	2.1747	1.1328	0.1798	yes	up
metab_1930	-	-	-	4',6-Dihydroxyflavone	8.025e-05	0.005944	2.3288	2.3037	1.1195	0.1629	yes	up
metab_9121	Phenylpropanoids and polyketides	Flavonoids	Flavones	Kaempferol	0.009966	0.1109	2.319	2.2576	1.1666	0.2223	yes	up
metab_1705	Lipids and lipid-like molecules	Fatty Acyls	Fatty aldehydes	Octadec-9-Enal	0.01227	0.1222	2.3147	2.2856	1.2072	0.2717	yes	up
metab_7260	Lipids and lipid-like molecules	Fatty Acyls	Fatty acids and conjugates	2-Hydroxyadipic Acid	0.0007765	0.02661	2.2896	2.2486	1.1429	0.1926	yes	up
metab_5763	Organic acids and derivatives	Carboxylic acids and derivatives	Amino acids, peptides, and analogues	Citrulline	0.001162	0.03394	2.2601	2.2853	1.1533	0.2058	yes	up
metab_4492	Lipids and lipid-like molecules	Fatty Acyls	Fatty acid esters	Nonanedioylcarnitine	5.206e-05	0.004683	2.2502	2.2021	1.0947	0.1305	yes	up
metab_8984	Phenylpropanoids and polyketides	Flavonoids	Flavans	Norartocarpanone	0.0008987	0.02921	2.2454	2.2138	1.1249	0.1698	yes	up
metab_9709	-	-	-	5-O-Methylbiochanin A	0.009093	0.1054	2.2207	2.1134	1.121	0.1648	yes	up
metab_9434	Lipids and lipid-like molecules	Prenol lipids	Diterpenoids	Tanshinol A	0.01625	0.1399	2.2193	2.1405	1.1699	0.2263	yes	up
metab_2107	Benzenoids	Benzene and substituted derivatives	Phenylpropanes	(2S,3S)-2-(2,4-Difluorophenyl)-3-Methylsulfonyl-1-(1,2,4-Triazol-1-Yl)Butan-2-Ol	9.295e-06	0.001435	2.2156	2.1822	1.083	0.1151	yes	up
metab_9646	-	-	-	2-Hydroxyanthraquinone	1.029e-05	0.001505	2.2078	2.1737	1.095	0.131	yes	up
metab_4185	-	-	-	3,7-Dihydroxyflavone	0.0001873	0.01045	2.1958	2.1782	1.1028	0.1412	yes	up
metab_13130	Phenylpropanoids and polyketides	Stilbenes	Not Available	2',3,4',5-Tetrahydroxy-4-Prenylstilbene	0.01762	0.145	2.1872	2.1043	1.0846	0.1171	yes	up
metab_4709	Organic acids and derivatives	Carboxylic acids and derivatives	Dicarboxylic acids and derivatives	Candoxatrilat	0.004972	0.07759	2.1862	2.1051	1.1203	0.1639	yes	up
metab_9527	Phenylpropanoids and polyketides	Flavonoids	Flavonoid glycosides	Neocarthamin	0.005491	0.08175	2.1732	2.1083	1.1236	0.1681	yes	up
metab_11963	Phenylpropanoids and polyketides	Flavonoids	Flavones	7,4'-Dihydroxyflavone	6.908e-05	0.005414	2.1574	2.1372	1.0715	0.0996	yes	up
metab_1927	-	-	-	6,4'-Dihydroxyflavone	9.096e-05	0.006305	2.1557	2.1292	1.0719	0.1001	yes	up
metab_8336	Organic oxygen compounds	Organooxygen compounds	Carbohydrates and carbohydrate conjugates	(2S)-2-Butanol O-[B-D-Apiofuranosyl-(1->6)-B-D-Glucopyranoside]	0.01048	0.1135	2.1499	2.127	1.1287	0.1747	yes	up
metab_4991	Lipids and lipid-like molecules	Prenol lipids	Monoterpenoids	Carvone	0.0006626	0.02422	2.1478	2.0728	1.1032	0.1417	yes	up
metab_2284	Not Available	Not Available	Not Available	Pip(Pgj2/18:0)	0.04281	0.2171	2.1476	2.0022	1.105	0.144	yes	up
metab_12677	Organic acids and derivatives	Carboxylic acids and derivatives	Amino acids, peptides, and analogues	Pyridinoline	0.01067	0.1142	2.1447	2.1201	1.1184	0.1614	yes	up
metab_2094	-	-	-	5,4'-Dimethoxy-7-Hydroxyflavone	2.581e-05	0.002866	2.1442	2.1089	1.0677	0.0945	yes	up
metab_12495	Phenylpropanoids and polyketides	Flavonoids	Flavans	Eriodictyol	0.001305	0.03589	2.1428	2.0944	1.1179	0.1608	yes	up
metab_11714	Phenylpropanoids and polyketides	Cinnamic acids and derivatives	Hydroxycinnamic acids and derivatives	P-Coumaroyltriacetic Acid Lactone	7.147e-06	0.001186	2.1345	2.1067	1.0672	0.0938	yes	up
metab_1604	Lipids and lipid-like molecules	Steroids and steroid derivatives	Hydroxysteroids	Cortisone	0.006632	0.08896	2.1341	2.1312	1.1365	0.1846	yes	up
metab_9647	Phenylpropanoids and polyketides	Flavonoids	Flavones	Resokaempherol	3.11e-05	0.003271	2.1203	2.0963	1.0915	0.1264	yes	up
metab_4314	-	-	-	3-Fluoro-4-Methoxy-N-([1,2,4]Triazolo[4,3-A]Pyridin-8-Yl)Benzamide	0.0004555	0.01924	2.12	2.1292	1.0921	0.1271	yes	up
metab_9359	Phenylpropanoids and polyketides	Flavonoids	Flavans	Liquiritigenin	0.001055	0.0322	2.1162	2.0478	1.0851	0.1178	yes	up
metab_4998	Organoheterocyclic compounds	Piperidines	Not Available	4-Hydroxy-2,2,6,6-Tetramethylpiperidine-1-Oxyl	0.001787	0.04313	2.1154	2.0571	1.1091	0.1493	yes	up
metab_1843	Lipids and lipid-like molecules	Prenol lipids	Diterpenoids	Musabalbisiane A	0.00919	0.106	2.0856	2.0358	1.1169	0.1595	yes	up
metab_4568	Lipids and lipid-like molecules	Steroids and steroid derivatives	Steroid esters	[(8R,9S,13S,14S,17S)-17-Hydroxy-13-Methyl-6,7,8,9,11,12,14,15,16,17-Decahydrocyclopenta[A]Phenanthren-3-Yl] 3-Cyclopentylpropanoate	0.02591	0.1708	2.0712	2.0809	1.1617	0.2162	yes	up
metab_4190	-	-	-	4'-Hydroxy-5-Methoxyflavone	4.034e-05	0.003809	2.0586	2.0299	1.0509	0.0716	yes	up
metab_4827	Nucleosides, nucleotides, and analogues	Purine nucleotides	Cyclic purine nucleotides	13-Dihydrocarminomycin	0.02037	0.1532	2.0558	1.94	1.1108	0.1516	yes	up
metab_1451	Lipids and lipid-like molecules	Fatty Acyls	Fatty acid esters	6-Hydroxyheptanoylcarnitine	0.004108	0.06953	2.0506	2.0279	1.1026	0.1409	yes	up
metab_13752	Organic acids and derivatives	Carboxylic acids and derivatives	Amino acids, peptides, and analogues	N(2)-Phenylacetyl-L-Glutaminate	0.0006059	0.02271	2.0483	1.9838	1.0874	0.1209	yes	up
metab_7549	Benzenoids	Benzene and substituted derivatives	Nitrobenzenes	5-Hydroxy-3-[[5-(4-Nitrophenyl)Furan-2-Yl]Methylideneamino]-1H-Imidazol-2-One	0.015	0.1342	2.0469	2.057	1.1516	0.2037	yes	up
metab_1960	Organic oxygen compounds	Organooxygen compounds	Carbohydrates and carbohydrate conjugates	Validamycin A	0.02545	0.1693	2.0462	1.9488	1.1028	0.1412	yes	up
metab_11712	-	-	-	Pratol	1.094e-05	0.001565	2.0444	2.0151	1.0488	0.0687	yes	up
metab_9953	Lipids and lipid-like molecules	Glycerophospholipids	Glycerophosphoethanolamines	Lpe(16:0)	0.0003363	0.01621	2.0387	1.9923	0.9236	-0.1147	yes	down
metab_937	-	-	-	3-Cyclopropyl-6-Pyrrolidin-1-Yl-[1,2,4]Triazolo[4,3-B]Pyridazine	0.001836	0.04364	2.0337	1.9415	1.0823	0.1141	yes	up
metab_12809	Phenylpropanoids and polyketides	Macrolides and analogues	Not Available	Latrunculin A	0.03626	0.2008	2.0281	2.1782	1.1353	0.1831	yes	up
metab_4610	Lipids and lipid-like molecules	Fatty Acyls	Fatty acid esters	Nona-3,5,7-Trienoylcarnitine	0.00623	0.08607	2.0166	2.0042	1.1001	0.1377	yes	up
metab_1684	Lipids and lipid-like molecules	Prenol lipids	Sesquiterpenoids	3,11,12-Trihydroxy-1(10)-Spirovetiven-2-One	0.0228	0.1607	2.0142	2.0203	1.1212	0.165	yes	up
metab_2013	Phenylpropanoids and polyketides	Flavonoids	Flavonoid glycosides	Apigenin 7-Di-O-Xyloside	0.01654	0.1407	2.0012	2.0221	1.1181	0.1611	yes	up
metab_13840	Organoheterocyclic compounds	Azolidines	Imidazolidines	Dantrolene	0.03494	0.1973	2.0008	2.0697	1.1201	0.1637	yes	up
metab_4482	-	-	-	13,14-Dihydro-15(R,S)-Hydroxy-16,16-Difluoro Prostaglandin E1-D4	0.04295	0.2173	2.0004	1.9944	1.1496	0.2011	yes	up
metab_4705	Lipids and lipid-like molecules	Prenol lipids	Sesquiterpenoids	5-Hydroxy-4-Methoxybisabola-2,10-Dien-9-One	0.03051	0.1844	1.9999	1.9829	1.1437	0.1937	yes	up
metab_13051	Phenylpropanoids and polyketides	Flavonoids	Flavonoid glycosides	Tricin 7-Neohesperidoside	0.01827	0.1467	1.998	1.9477	1.1049	0.1439	yes	up
metab_13814	Organoheterocyclic compounds	Thienopyrimidines	Not Available	(S)-5-(4-Hydroxy-4-Methylisoxazolidine-2-Carbonyl)-1-Isopropyl-3-Methyl-6-((3-Methyl-5-(Trifluoromethyl)-1H-Pyrazol-4-Yl)Methyl)Thieno[2,3-D]Pyrimidine-2,4(1H,3H)-Dione	0.014	0.1296	1.9896	1.9579	1.0904	0.1248	yes	up
metab_9252	Phenylpropanoids and polyketides	Flavonoids	Flavonoid glycosides	Liquiritin	0.003587	0.06511	1.9713	1.8752	1.0908	0.1254	yes	up
metab_7265	Lipids and lipid-like molecules	Fatty Acyls	Fatty acyl glycosides	L-Ascorbic Acid 2-Glucoside	0.0002298	0.0123	1.9689	1.8802	1.0857	0.1186	yes	up
metab_12047	Organic acids and derivatives	Keto acids and derivatives	Beta-keto acids and derivatives	Methyl Acetoacetate	0.000513	0.02046	1.9671	1.9954	0.8617	-0.2147	yes	down
metab_1951	Phenylpropanoids and polyketides	Coumarins and derivatives	Not Available	4-Methylcoumarin	0.02116	0.1554	1.9635	1.8478	1.1548	0.2077	yes	up
metab_1437	Organic acids and derivatives	Carboxylic acids and derivatives	Amino acids, peptides, and analogues	Ulimorelin	0.02007	0.1523	1.9624	1.9446	1.1252	0.1702	yes	up
metab_14028	Organic acids and derivatives	Keto acids and derivatives	Short-chain keto acids and derivatives	2-Keto-Glutaramic Acid	0.04165	0.2146	1.9536	2.0217	1.1532	0.2057	yes	up
metab_11972	-	-	-	Isosulochrin	9.463e-05	0.006485	1.937	1.8644	1.0784	0.109	yes	up
metab_1254	Organic oxygen compounds	Organooxygen compounds	Alcohols and polyols	N-(1-Deoxy-1-Fructosyl)Isoleucine	0.01522	0.1349	1.9262	1.805	1.0899	0.1242	yes	up
metab_9066	Phenylpropanoids and polyketides	Flavonoids	Flavonoid glycosides	Luteolin 3'-(3''-Acetylglucuronide)	0.005245	0.0801	1.9246	1.9258	0.9174	-0.1244	yes	down
metab_4740	Lipids and lipid-like molecules	Fatty Acyls	Fatty acid esters	Sebacoyl-L-Carnitine	0.004112	0.06953	1.9047	1.8261	1.0855	0.1183	yes	up
metab_4650	-	-	-	N-Dodecanoyl-Dl-Homoserine Lactone	0.02761	0.1768	1.9046	1.8743	1.1161	0.1585	yes	up
metab_9173	Organoheterocyclic compounds	Benzodiazepines	Not Available	4'-Hydroxyclobazam	0.00998	0.1109	1.9005	1.9233	1.1065	0.146	yes	up
metab_12168	-	-	-	Haematoxylin	0.002647	0.05537	1.8985	1.8901	1.0819	0.1135	yes	up
metab_14116	Organic acids and derivatives	Carboxylic acids and derivatives	Amino acids, peptides, and analogues	N-Formyl-L-Glutamic Acid	0.005473	0.08173	1.8927	1.8267	1.1331	0.1802	yes	up
metab_11646	Phenylpropanoids and polyketides	Isoflavonoids	O-methylated isoflavonoids	Biochanin A	0.0002761	0.01395	1.888	1.8837	1.0619	0.0866	yes	up
metab_4446	Phenylpropanoids and polyketides	Flavonoids	Flavonoid glycosides	Baicalin	0.04957	0.2322	1.8829	1.8568	1.1162	0.1586	yes	up
metab_11586	-	-	-	Soyasapogenol B Base+O-Hexa-Hexa-Hex+Me+Acetyl	0.03985	0.209	1.8806	1.7405	1.0708	0.0987	yes	up
metab_7306	Organic acids and derivatives	Carboxylic acids and derivatives	Tricarboxylic acids and derivatives	Citric Acid	0.01641	0.14	1.8798	1.8641	0.9444	-0.0825	yes	down
metab_7303	Organoheterocyclic compounds	Furans	Furoic acid and derivatives	2-Furoic Acid	0.01325	0.1263	1.8792	1.8638	0.9323	-0.1012	yes	down
metab_13858	Nucleosides, nucleotides, and analogues	Purine nucleosides	Purine 2''-deoxyribonucleosides	Deoxyinosine	0.04384	0.2194	1.876	1.9301	0.9036	-0.1462	yes	down
metab_12291	Phenylpropanoids and polyketides	Flavonoids	Flavans	Epigallocatechin Gallate	0.002883	0.05772	1.8752	1.8801	0.9404	-0.0886	yes	down
metab_12192	Nucleosides, nucleotides, and analogues	Purine nucleosides	Purine 2''-deoxyribonucleosides	8-Hydroxy-2-Desoxyguanosine	0.01305	0.1259	1.8723	1.8795	1.0837	0.116	yes	up
metab_4543	Organic acids and derivatives	Carboxylic acids and derivatives	Amino acids, peptides, and analogues	N-Malonyltryptophan	0.01969	0.151	1.8694	1.7687	1.1062	0.1456	yes	up
metab_4342	Phenylpropanoids and polyketides	Linear 1,3-diarylpropanoids	Cinnamylphenols	2'-O-Methylisoliquiritigenin	0.00997	0.1109	1.8686	1.7887	1.0761	0.1058	yes	up
metab_9652	Phenylpropanoids and polyketides	Flavonoids	Flavans	3-O-Acetylpinobanksin	0.0005315	0.02077	1.8684	1.8732	1.0786	0.1092	yes	up
metab_5032	Organic acids and derivatives	Carboxylic acids and derivatives	Amino acids, peptides, and analogues	Valylisoleucine	0.02139	0.1561	1.8637	1.9312	0.8772	-0.189	yes	down
metab_13320	Organic acids and derivatives	Carboxylic acids and derivatives	Amino acids, peptides, and analogues	Telotristat	0.00552	0.08175	1.8629	1.7791	0.931	-0.1032	yes	down
metab_9499	Phenylpropanoids and polyketides	Flavonoids	O-methylated flavonoids	Isosakuranetin	0.0001949	0.01077	1.8594	1.8616	1.0583	0.0817	yes	up
metab_11596	Alkaloids and derivatives	Ergoline and derivatives	Lysergic acids and derivatives	Ergocornine	0.0003367	0.01621	1.8573	1.8703	0.939	-0.0908	yes	down
metab_4077	Phenylpropanoids and polyketides	Isoflavonoids	Isoflav-2-enes	Glycitein	0.001225	0.03506	1.8505	1.8515	1.07	0.0976	yes	up
metab_1761	Organic acids and derivatives	Carboxylic acids and derivatives	Amino acids, peptides, and analogues	N-Undecanoylglycine	0.02971	0.1824	1.8399	1.8093	1.093	0.1283	yes	up
metab_4460	Organic oxygen compounds	Organooxygen compounds	Carbohydrates and carbohydrate conjugates	Beta-D-Glucopyranuronic Acid	0.005688	0.08278	1.8286	1.8376	0.9208	-0.119	yes	down
metab_9217	Organoheterocyclic compounds	Pyridines and derivatives	Hydropyridines	Diethyl 2,3,4-Trimethyl-2,3-Dihydropyridine-5,6-Dicarboxylate	0.03669	0.2019	1.8281	1.8397	1.1742	0.2317	yes	up
metab_5648	Organic acids and derivatives	Carboximidic acids and derivatives	Carboximidic acids	Acrylamide	0.01177	0.12	1.8237	1.761	1.1675	0.2234	yes	up
metab_9137	Lipids and lipid-like molecules	Fatty Acyls	Fatty acids and conjugates	Traumatic Acid	0.001272	0.03539	1.8158	1.7918	1.0921	0.127	yes	up
metab_11994	Organoheterocyclic compounds	Naphthofurans	Not Available	Marasmal	8.444e-05	0.006063	1.8145	1.779	0.9465	-0.0793	yes	down
metab_11950	Phenylpropanoids and polyketides	Flavonoids	O-methylated flavonoids	Diosmetin	0.000939	0.03011	1.8128	1.8242	1.0569	0.0798	yes	up
metab_8691	Organic oxygen compounds	Organooxygen compounds	Carbohydrates and carbohydrate conjugates	Temazepam Glucuronide	0.003624	0.06539	1.8114	1.7186	1.0649	0.0907	yes	up
metab_9101	-	-	-	Maesopsin	0.002309	0.05053	1.8111	1.7815	1.08	0.111	yes	up
metab_12666	Benzenoids	Anthracenes	Anthraquinones	Emodin 8-Glucoside	0.004948	0.07736	1.8096	1.715	1.0718	0.1	yes	up
metab_8228	Benzenoids	Phenols	Methoxyphenols	Normetanephrine	0.02213	0.1593	1.8088	1.7379	1.0877	0.1213	yes	up
metab_7391	Nucleosides, nucleotides, and analogues	Ribonucleoside 3''-phosphates	Not Available	Adenosine 3'-Monophosphate	0.008328	0.1004	1.7984	1.7342	0.9356	-0.096	yes	down
metab_4802	Organic acids and derivatives	Carboxylic acids and derivatives	Amino acids, peptides, and analogues	N-Octanoyl-L-Homoserine Lactone	0.001071	0.03251	1.7966	1.8027	1.0838	0.1162	yes	up
metab_9526	Organoheterocyclic compounds	Heteroaromatic compounds	Not Available	2-Methyl-3-Furyl Methylthiomethyl Disulfide	0.03112	0.1863	1.7915	1.8052	1.1048	0.1438	yes	up
metab_1816	Lipids and lipid-like molecules	Fatty Acyls	Fatty acids and conjugates	Dioscoretine	0.01488	0.1336	1.7891	1.8049	1.0916	0.1264	yes	up
metab_4996	Organic acids and derivatives	Carboxylic acids and derivatives	Amino acids, peptides, and analogues	Fructosyl-Lysine	0.03687	0.202	1.7855	1.8124	1.1654	0.2208	yes	up
metab_1696	Lipids and lipid-like molecules	Fatty Acyls	Fatty acid esters	6-Hydroxynon-7-Enoylcarnitine	0.0003482	0.0165	1.7802	1.7331	1.0503	0.0708	yes	up
metab_9377	Benzenoids	Anthracenes	Anthraquinones	Purpurin	0.001166	0.03395	1.777	1.7333	1.0666	0.093	yes	up
metab_1560	Lipids and lipid-like molecules	Fatty Acyls	Fatty acid esters	(6E,10E)-3-Hydroxydodeca-6,10-Dienoylcarnitine	0.001159	0.03394	1.7748	1.715	1.0595	0.0834	yes	up
metab_10046	-	-	-	7,2'-Dihydroxyflavone	0.0002824	0.01417	1.7728	1.7766	1.0512	0.0721	yes	up
metab_4792	-	-	-	2-Hydroxyalternariol-9-Methyl Ether	0.04643	0.2252	1.7726	1.8289	0.8789	-0.1863	yes	down
metab_11830	Lipids and lipid-like molecules	Prenol lipids	Terpene glycosides	Canavalioside	0.01354	0.1274	1.7688	1.802	1.1082	0.1482	yes	up
metab_8864	Nucleosides, nucleotides, and analogues	5''-deoxyribonucleosides	Not Available	5'-Deoxy-5-Fluorouridine	0.0234	0.1627	1.7611	1.7016	0.9216	-0.1177	yes	down
metab_9245	Phenylpropanoids and polyketides	Tannins	Hydrolyzable tannins	Castacrenin B	0.007878	0.0978	1.7606	1.7559	0.9297	-0.1052	yes	down
metab_9098	-	-	-	Demethyl Medicarpin	9.799e-05	0.006639	1.7373	1.6884	1.0653	0.0912	yes	up
metab_4801	Organoheterocyclic compounds	Quinolines and derivatives	Indoloquinolines	Sulfamide, N,N-Dimethyl-N'-((8Alpha)-6-Propylergolin-8-Yl)-	0.01723	0.1442	1.7359	1.7307	1.0837	0.116	yes	up
metab_7278	Organic acids and derivatives	Carboxylic acids and derivatives	Amino acids, peptides, and analogues	1-Pyrroline-5-Carboxylic Acid	0.0008383	0.02808	1.7318	1.7194	1.0818	0.1134	yes	up
metab_5089	Benzenoids	Phenol ethers	Not Available	Triadimefon	0.01664	0.1411	1.7239	1.654	1.0835	0.1157	yes	up
metab_8503	-	-	-	Phenylacetylaspartic Acid	8.007e-07	0.0002743	1.7218	1.6898	1.0502	0.0707	yes	up
metab_8518	-	-	-	Sulfo Jasmonate	0.001856	0.04391	1.7188	1.7362	1.0667	0.0931	yes	up
metab_12573	Organoheterocyclic compounds	Lactams	Beta lactams	Ceftizoxime Alapivoxil	0.005645	0.08243	1.7089	1.6407	0.9379	-0.0924	yes	down
metab_4339	Not Available	Not Available	Not Available	Oxonol	0.009166	0.1058	1.7071	1.6266	1.0735	0.1024	yes	up
metab_4712	Organoheterocyclic compounds	Diazines	Pyrazines	Ethylisopropylamiloride	0.03564	0.1994	1.7048	1.6513	1.0969	0.1334	yes	up
metab_910	Phenylpropanoids and polyketides	Isoflavonoids	Hydroxyisoflavonoids	Glycycoumarin	0.003852	0.06744	1.6965	1.7475	1.0901	0.1244	yes	up
metab_5394	-	-	-	Pyridoxine+O-Hex	0.04351	0.2188	1.6933	1.6408	1.0965	0.1329	yes	up
metab_13906	Organic oxygen compounds	Organooxygen compounds	Carbohydrates and carbohydrate conjugates	Fructose Lactate	0.005575	0.08213	1.6914	1.617	0.9409	-0.0878	yes	down
metab_1698	Benzenoids	Phenols	Tyrosols and derivatives	O-Demethylmetoprolol	0.0008671	0.02857	1.6862	1.6392	1.0595	0.0834	yes	up
metab_1521	Benzenoids	Benzene and substituted derivatives	Phenylacetamides	2-Phenylacetamide	0.01639	0.14	1.679	1.7153	1.0846	0.1171	yes	up
metab_4621	-	-	-	Cardamonin	0.007817	0.09736	1.6775	1.6304	1.0834	0.1156	yes	up
metab_10860	Lipids and lipid-like molecules	Glycerophospholipids	Glycerophosphoethanolamines	Lysope(18:4(6Z,9Z,12Z,15Z)/0:0)	0.02499	0.1677	1.6757	1.6536	0.9274	-0.1087	yes	down
metab_2102	-	-	-	7-Beta-Hydroxylathyrol	0.01919	0.1501	1.6658	1.6144	0.9328	-0.1004	yes	down
metab_9322	Organic acids and derivatives	Carboxylic acids and derivatives	Amino acids, peptides, and analogues	4-Ethoxymethylene-2-Phenyl-2-Oxazolin-5-One	0.001363	0.03705	1.6633	1.6398	1.0584	0.0819	yes	up
metab_4025	Lipids and lipid-like molecules	Fatty Acyls	Eicosanoids	Thromboxane B2	0.008654	0.1019	1.6582	1.614	1.0658	0.0919	yes	up
metab_14342	Organoheterocyclic compounds	Imidazodiazepines	Not Available	Pentostatin	0.01273	0.1242	1.6575	1.6491	1.0792	0.11	yes	up
metab_1412	Organoheterocyclic compounds	Azolidines	Thiazolidines	Isoleucyl-Thiazolidine	0.01079	0.1148	1.6533	1.6353	1.0653	0.0912	yes	up
metab_3253	Lipids and lipid-like molecules	Steroids and steroid derivatives	Bile acids, alcohols and derivatives	3A,7A,12A-Trihydroxy-5B-Cholestan-26-Al	0.04328	0.2183	1.6527	1.6758	1.0966	0.1331	yes	up
metab_7337	Organoheterocyclic compounds	Pyrroles	Substituted pyrroles	1-Methylpyrrole-2,5-Diol	0.01058	0.114	1.6441	1.6724	1.0879	0.1216	yes	up
metab_1737	Lipids and lipid-like molecules	Fatty Acyls	Fatty acid esters	3-Hydroxynona-5,7-Dienoylcarnitine	0.003564	0.06495	1.6427	1.6124	1.0526	0.0739	yes	up
metab_8077	Organoheterocyclic compounds	Isoindoles and derivatives	Isoindolines	5-Hydroxy-3-(4-Hydroxyphenyl)-6-Methoxy-7-[(2S,4S,5S)-3,4,5-Trihydroxy-6-(Hydroxymethyl)Oxan-2-Yl]Oxychromen-4-One	0.01639	0.14	1.6416	1.6673	0.9292	-0.106	yes	down
metab_9795	Phenylpropanoids and polyketides	Flavonoids	Flavones	Pinoquercetin	0.04835	0.2291	1.6365	1.6192	0.9233	-0.1152	yes	down
metab_8649	Organoheterocyclic compounds	Pyrans	Not Available	Patulin	0.001614	0.0411	1.6364	1.6252	0.9574	-0.0628	yes	down
metab_935	Nucleosides, nucleotides, and analogues	Purine nucleotides	Purine ribonucleotides	Adenosine Monophosphate	0.01294	0.1253	1.6253	1.5587	0.942	-0.0862	yes	down
metab_7831	Organoheterocyclic compounds	Imidazopyrimidines	Purines and purine derivatives	Tenofovir Disoproxil	0.008106	0.09921	1.6223	1.543	0.9441	-0.083	yes	down
metab_4255	-	-	-	Lys His Lys	0.0004441	0.01916	1.622	1.5981	0.9513	-0.072	yes	down
metab_4518	-	-	-	2-(4-Methyl-1,4-Diazepan-1-Yl)Quinazolin-4-Amine	0.02862	0.1799	1.6179	1.6394	1.0757	0.1052	yes	up
metab_5765	Organic acids and derivatives	Carboxylic acids and derivatives	Amino acids, peptides, and analogues	Oxiracetam	0.0003631	0.01681	1.6072	1.5835	1.0631	0.0883	yes	up
metab_5835	-	-	-	2-(4-Methoxybenzoyl)-3-(2-Thienyl)Acrylonitrile	0.03502	0.1974	1.5996	1.531	1.0719	0.1002	yes	up
metab_2879	Not Available	Not Available	Not Available	Dg(20:4(5Z,8Z,11Z,14Z)-Oh(19S)/14:0/0:0)	0.0444	0.2204	1.5988	1.6021	1.0832	0.1153	yes	up
metab_2111	-	-	-	Tetradecyldiethanolamine	0.0008326	0.02802	1.5969	1.6016	0.9508	-0.0728	yes	down
metab_11727	-	-	-	3-(5-Acetyl-2-Furyl)-5-Methoxy-2-Benzofuran-1(3H)-One	0.0004877	0.0201	1.5962	1.5971	1.0426	0.0602	yes	up
metab_1504	Lipids and lipid-like molecules	Prenol lipids	Terpene glycosides	Isopetasoside	0.04183	0.2146	1.5822	1.5742	1.0815	0.113	yes	up
metab_7096	Organic acids and derivatives	Carboxylic acids and derivatives	Carboxylic acids	3-Iodopropanoic Acid	0.0001528	0.008983	1.5814	1.5254	0.955	-0.0664	yes	down
metab_5437	-	-	-	Ala Asn Glu	0.01676	0.1418	1.5794	1.5101	1.0762	0.1059	yes	up
metab_12480	Lipids and lipid-like molecules	Steroids and steroid derivatives	Steroid esters	Beta-Estradiol 17-Propionate	0.006347	0.08659	1.5789	1.5426	1.1022	0.1404	yes	up
metab_4218	Lipids and lipid-like molecules	Fatty Acyls	Eicosanoids	Mg(0:0/Pge2/0:0)	0.02108	0.1553	1.5729	1.5207	1.0634	0.0887	yes	up
metab_13346	Lipids and lipid-like molecules	Steroids and steroid derivatives	Hydroxysteroids	16Alpha-Hydroxyprednisolone	0.01868	0.1483	1.5724	1.6061	1.0756	0.1052	yes	up
metab_4847	Not Available	Not Available	Not Available	N-Eicosapentaenoyl Cysteine	0.01447	0.1321	1.5555	1.5387	1.0609	0.0853	yes	up
metab_4697	Lipids and lipid-like molecules	Fatty Acyls	Fatty acid esters	6-Hydroxydodeca-8,10-Dienoylcarnitine	0.00255	0.05422	1.5466	1.4909	1.0433	0.0612	yes	up
metab_4690	Organic acids and derivatives	Carboxylic acids and derivatives	Amino acids, peptides, and analogues	Arginyltryptophan	0.04217	0.2156	1.5455	1.5522	1.0737	0.1026	yes	up
metab_4396	Organoheterocyclic compounds	Isobenzofurans	Not Available	Ligustilide	0.03345	0.1926	1.5416	1.4918	1.0788	0.1094	yes	up
metab_8190	Lipids and lipid-like molecules	Prenol lipids	Terpene glycosides	Paeoniflorin	0.03022	0.1836	1.5403	1.5205	0.943	-0.0846	yes	down
metab_4657	Organoheterocyclic compounds	Piperidines	Piperidinones	Cycloheximide	0.006868	0.09011	1.5395	1.4988	1.0528	0.0742	yes	up
metab_4673	Lipids and lipid-like molecules	Fatty Acyls	Fatty acid esters	(2Z)-Non-2-Enoylcarnitine	0.008296	0.1003	1.537	1.5042	1.0525	0.0738	yes	up
metab_9433	Phenylpropanoids and polyketides	Isoflavonoids	Not Available	(-)-Medicarpin	0.03262	0.1902	1.5325	1.4565	1.0565	0.0793	yes	up
metab_8873	Phenylpropanoids and polyketides	Flavonoids	Flavonoid glycosides	Neoliquiritin	0.03189	0.1883	1.5258	1.4455	1.0527	0.0741	yes	up
metab_12533	-	-	-	6-Chloro-2-Picolinic Acid	0.0005853	0.02225	1.5062	1.4438	1.0525	0.0738	yes	up
metab_12189	Phenylpropanoids and polyketides	Linear 1,3-diarylpropanoids	Chalcones and dihydrochalcones	Phloretin	0.02303	0.1615	1.5043	1.4798	1.0527	0.0741	yes	up
metab_9612	Phenylpropanoids and polyketides	Linear 1,3-diarylpropanoids	Chalcones and dihydrochalcones	Isoliquiritigenin	0.04448	0.2204	1.5037	1.4392	1.0654	0.0915	yes	up
metab_3556	Lipids and lipid-like molecules	Glycerolipids	Diradylglycerols	Dg(18:4(6Z,9Z,12Z,15Z)/22:5(7Z,10Z,13Z,16Z,19Z)/0:0)	0.03378	0.1938	1.5005	1.5154	1.0574	0.0805	yes	up
metab_10018	Not Available	Not Available	Not Available	Dg(A-13:0/0:0/Pge2)	0.02201	0.1589	1.5001	1.4245	0.9531	-0.0693	yes	down
metab_12964	Organic acids and derivatives	Keto acids and derivatives	Gamma-keto acids and derivatives	(1R,6R)-6-Hydroxy-2-Succinylcyclohexa-2,4-Diene-1-Carboxylate	0.01427	0.1312	1.497	1.4731	0.9476	-0.0777	yes	down
metab_4917	Benzenoids	Tetralins	Not Available	Tamibarotene	0.02461	0.1666	1.4801	1.5105	1.0639	0.0894	yes	up
metab_4649	Benzenoids	Benzene and substituted derivatives	Benzoic acids and derivatives	Vanillic Acid	0.0005299	0.02077	1.4792	1.4708	0.9544	-0.0673	yes	down
metab_1749	Lipids and lipid-like molecules	Fatty Acyls	Lineolic acids and derivatives	Dihydrojasmonic Acid	0.003274	0.06203	1.4784	1.4295	1.0501	0.0705	yes	up
metab_4591	Organic acids and derivatives	Carboxylic acids and derivatives	Amino acids, peptides, and analogues	N-Omega-Propyl-L-Arginine	0.0001007	0.00671	1.4751	1.482	1.0475	0.0669	yes	up
metab_3430	Lipids and lipid-like molecules	Fatty Acyls	Fatty alcohols	Mosinone A	0.02548	0.1693	1.4677	1.448	1.0535	0.0753	yes	up
metab_8367	Benzenoids	Benzene and substituted derivatives	Biphenyls and derivatives	Sacubitrilat	0.0373	0.2028	1.4669	1.4346	0.9462	-0.0798	yes	down
metab_5825	Organic acids and derivatives	Carboxylic acids and derivatives	Amino acids, peptides, and analogues	Sarcosine	0.009263	0.1066	1.4607	1.4072	1.0435	0.0614	yes	up
metab_9343	Organic oxygen compounds	Organooxygen compounds	Alcohols and polyols	(3S)-3-Hydroxycyclocitral	0.001336	0.03652	1.4586	1.4326	0.9678	-0.0473	yes	down
metab_4214	-	-	-	Meprylcaine	0.001525	0.03957	1.4511	1.4413	0.9514	-0.0719	yes	down
metab_1552	Organic oxygen compounds	Organooxygen compounds	Alcohols and polyols	Ovalicin	0.002764	0.05626	1.4465	1.4045	1.0429	0.0605	yes	up
metab_12897	Lipids and lipid-like molecules	Prenol lipids	Terpene glycosides	2''-Methoxy-(S)-Oleuropein	0.04161	0.2146	1.4235	1.4512	0.9395	-0.09	yes	down
metab_4706	-	-	-	1-Hydroxy-6-Methoxyxanthen-9-One	0.02179	0.1582	1.4152	1.4202	1.0551	0.0774	yes	up
metab_12119	Lipids and lipid-like molecules	Fatty Acyls	Fatty acids and conjugates	Undecanedioic Acid	0.003004	0.05936	1.4081	1.3769	1.0402	0.0568	yes	up
metab_1587	Phenylpropanoids and polyketides	Isoflavonoids	Isoflav-2-enes	Genistein	0.02511	0.1683	1.4061	1.4096	1.054	0.0759	yes	up
metab_1700	-	-	-	1-[2-(Hydroxymethyl)Pyrrolidin-1-Yl]-2-Methyldec-8-Ene-1,3-Dione	0.01806	0.1464	1.4012	1.3845	1.0484	0.0682	yes	up
metab_1898	Organic oxygen compounds	Organooxygen compounds	Carbonyl compounds	(Z)-3-Oxo-2-(2-Pentenyl)-1-Cyclopenteneacetic Acid	0.03238	0.1896	1.3996	1.3797	1.0648	0.0906	yes	up
metab_2633	Lipids and lipid-like molecules	Glycerolipids	Diradylglycerols	Dg(22:4(7Z,10Z,13Z,16Z)/18:4(6Z,9Z,12Z,15Z)/0:0)	0.03973	0.2087	1.3924	1.4055	1.0504	0.0709	yes	up
metab_11997	Lipids and lipid-like molecules	Fatty Acyls	Fatty acids and conjugates	3-Carboxy-4-Methyl-5-Pentyl-2-Furanpropanoic Acid	0.0004558	0.01924	1.3891	1.3529	0.9642	-0.0526	yes	down
metab_1234	Nucleosides, nucleotides, and analogues	Purine nucleosides	Not Available	N2,N2-Dimethylguanosine	0.00376	0.06652	1.3877	1.4214	1.0406	0.0574	yes	up
metab_9345	Organoheterocyclic compounds	Tetrapyrroles and derivatives	Porphyrins	Inosine 2',3'-Cyclic Phosphate	0.0331	0.1913	1.3854	1.3844	0.9419	-0.0864	yes	down
metab_10492	Phenylpropanoids and polyketides	Flavonoids	O-methylated flavonoids	Isokaempferide	0.02493	0.1677	1.3842	1.4146	1.0672	0.0939	yes	up
metab_4727	-	-	-	N-3-Oxo-Tetradec-7(Z)-Enoyl-L-Homoserine Lactone	0.01548	0.1357	1.3832	1.3448	1.0548	0.077	yes	up
metab_1965	Lipids and lipid-like molecules	Fatty Acyls	Fatty acids and conjugates	12-Methyltridecanoic Acid	0.001246	0.03513	1.3827	1.3891	0.9597	-0.0593	yes	down
metab_10475	Lipids and lipid-like molecules	Glycerophospholipids	Glycerophosphoethanolamines	Lysope(0:0/18:3(9Z,12Z,15Z))	0.0068	0.0901	1.3822	1.3635	0.9606	-0.058	yes	down
metab_9455	-	-	-	Juniperoside Iii	0.01089	0.1154	1.3791	1.3654	0.9497	-0.0745	yes	down
metab_1002	Nucleosides, nucleotides, and analogues	Purine nucleosides	Purine 2''-deoxyribonucleosides	Deoxyadenosine	0.01443	0.132	1.3781	1.3749	0.9641	-0.0528	yes	down
metab_3557	Lipids and lipid-like molecules	Sphingolipids	Phosphosphingolipids	Sm(D18:1/12:0)	0.007054	0.09185	1.3722	1.3619	1.0365	0.0517	yes	up
metab_9746	-	-	-	(2E)-5-(3-Hydroxy-2,3-Dimethylbicyclo[2.2.1]Hept-2-Yl)-2-Methyl-2-Pentenoic Acid	0.007946	0.09824	1.3611	1.3537	0.9596	-0.0595	yes	down
metab_1588	-	-	-	Fustin	0.02631	0.1716	1.3597	1.3654	1.0488	0.0688	yes	up
metab_1589	Phenylpropanoids and polyketides	Flavonoids	Flavonoid glycosides	Astilbin	0.02133	0.156	1.3592	1.363	1.044	0.0621	yes	up
metab_12477	Organic acids and derivatives	Carboxylic acids and derivatives	Amino acids, peptides, and analogues	N-Acetyl-L-Tryptophan	0.0333	0.1922	1.3566	1.2904	1.0485	0.0684	yes	up
metab_11178	Lipids and lipid-like molecules	Fatty Acyls	Fatty acids and conjugates	Ricinoleic Acid	0.008601	0.1017	1.3543	1.3956	0.9639	-0.0531	yes	down
metab_12828	Lipids and lipid-like molecules	Fatty Acyls	Fatty acids and conjugates	3-(1-Hydroxymethyl-1-Propenyl)Pentanedioic Acid	0.008043	0.09882	1.3523	1.3005	1.0456	0.0644	yes	up
metab_11297	-	-	-	8-(3-Oxo-2-(Pent-2-Enyl) Cyclopentenyl)Octanoic Acid	0.008828	0.1034	1.3456	1.2871	0.968	-0.047	yes	down
metab_9285	Lipids and lipid-like molecules	Fatty Acyls	Fatty acids and conjugates	Octanoic Acid	0.001895	0.04474	1.3389	1.3211	1.0406	0.0573	yes	up
metab_1334	Organic oxygen compounds	Organooxygen compounds	Carbohydrates and carbohydrate conjugates	Tuliposide A	0.00529	0.0803	1.335	1.2748	1.0353	0.05	yes	up
metab_5762	Organic acids and derivatives	Carboxylic acids and derivatives	Amino acids, peptides, and analogues	N-Carbamylglutamate	0.03138	0.1871	1.3349	1.2607	1.0483	0.0681	yes	up
metab_1456	Alkaloids and derivatives	Not Available	Not Available	Lycopsamine	0.01166	0.1194	1.333	1.3323	1.0461	0.0651	yes	up
metab_1833	Organoheterocyclic compounds	Pteridines and derivatives	Alloxazines and isoalloxazines	Lumichrome	3.749e-05	0.003685	1.3276	1.2905	1.033	0.0468	yes	up
metab_1120	Organic acids and derivatives	Carboxylic acids and derivatives	Amino acids, peptides, and analogues	G-Glu-Val	0.03336	0.1924	1.3207	1.2254	1.0447	0.0631	yes	up
metab_505	-	-	-	Ser Cys Cys	0.04451	0.2205	1.3175	1.284	0.9502	-0.0737	yes	down
metab_4164	-	-	-	Verrucarol	0.04985	0.233	1.3164	1.2354	0.9546	-0.067	yes	down
metab_4067	Lipids and lipid-like molecules	Prenol lipids	Terpene glycosides	Araliasaponin I	0.006298	0.08626	1.3143	1.2745	0.971	-0.0424	yes	down
metab_1578	Alkaloids and derivatives	Camptothecins	Not Available	Sn-38	0.002298	0.0504	1.3132	1.2937	1.04	0.0566	yes	up
metab_4677	Lipids and lipid-like molecules	Prenol lipids	Sesquiterpenoids	(1(10)E,4A,5E)-1(10),5-Germacradiene-12-Acetoxy-4,11-Diol	0.01659	0.1409	1.3127	1.2544	1.0388	0.0549	yes	up
metab_2881	Lipids and lipid-like molecules	Fatty Acyls	Fatty acids and conjugates	Dg(9D3/9D3/0:0)	0.005223	0.08008	1.3119	1.3123	1.0301	0.0427	yes	up
metab_5764	Organic acids and derivatives	Carboxylic acids and derivatives	Amino acids, peptides, and analogues	L-Alpha-Amino-5-Oxo-2(5H)-Isoxazolepropanoic Acid	0.01974	0.1512	1.309	1.3051	1.0448	0.0632	yes	up
metab_11861	Benzenoids	Phenols	Benzenediols	Resorcinol	0.0007362	0.02589	1.3048	1.3136	1.0449	0.0633	yes	up
metab_12819	-	-	-	Flavanomarein	0.008845	0.1034	1.3044	1.2915	1.0299	0.0426	yes	up
metab_10222	Lipids and lipid-like molecules	Sphingolipids	Ceramides	Cer(D18:1/12:0)	0.00455	0.07363	1.3029	1.2218	0.9723	-0.0405	yes	down
metab_4851	Lipids and lipid-like molecules	Steroids and steroid derivatives	Estrane steroids	Trilostane	0.03148	0.1871	1.3024	1.3354	1.0493	0.0694	yes	up
metab_5400	Nucleosides, nucleotides, and analogues	Ribonucleoside 3''-phosphates	Not Available	Uridine 3'-Monophosphate	0.02482	0.1674	1.2902	1.2555	0.9598	-0.0592	yes	down
metab_11399	Lipids and lipid-like molecules	Glycerophospholipids	Glycerophosphoethanolamines	Lpe(18:1)	0.02021	0.1527	1.2867	1.3318	0.9596	-0.0595	yes	down
metab_14387	Organic oxygen compounds	Organooxygen compounds	Carbohydrates and carbohydrate conjugates	Lactulose	0.04558	0.2229	1.2866	1.263	1.0448	0.0632	yes	up
metab_5741	Organic acids and derivatives	Carboxylic acids and derivatives	Amino acids, peptides, and analogues	4-Acetamidobutanoic Acid	0.006182	0.0858	1.2854	1.2604	1.0378	0.0535	yes	up
metab_13993	Organic acids and derivatives	Carboxylic acids and derivatives	Tricarboxylic acids and derivatives	Aconitic Acid	0.02795	0.1776	1.2853	1.2962	0.966	-0.0499	yes	down
metab_13089	Organic acids and derivatives	Keto acids and derivatives	Short-chain keto acids and derivatives	Alpha-Ketoisovaleric Acid	0.01366	0.1279	1.2839	1.2073	1.0369	0.0522	yes	up
metab_7431	Organic acids and derivatives	Hydroxy acids and derivatives	Medium-chain hydroxy acids and derivatives	5-Keto-D-Gluconate	0.01237	0.1227	1.279	1.1979	1.0426	0.0602	yes	up
metab_4029	Benzenoids	Indanes	Not Available	Hematein	0.01937	0.1507	1.2672	1.2607	1.0389	0.0551	yes	up
metab_9720	Lipids and lipid-like molecules	Prenol lipids	Terpene glycosides	Akebia Saponin D	0.01061	0.114	1.2606	1.2109	0.9737	-0.0385	yes	down
metab_8617	Lipids and lipid-like molecules	Fatty Acyls	Fatty acyl glycosides	Pantoyllactone Glucoside	0.02278	0.1607	1.2526	1.171	1.0381	0.0539	yes	up
metab_11147	Lipids and lipid-like molecules	Sphingolipids	Glycosphingolipids	As 1-1	0.004491	0.07316	1.247	1.1853	0.9764	-0.0344	yes	down
metab_1517	Organic acids and derivatives	Carboxylic acids and derivatives	Amino acids, peptides, and analogues	N-Lauroyl Threonine	0.04698	0.2265	1.2469	1.2051	1.0419	0.0592	yes	up
metab_3411	Not Available	Not Available	Not Available	Dg(16:0/Pge2/0:0)	0.01106	0.1164	1.246	1.2586	1.029	0.0412	yes	up
metab_4405	-	-	-	Izalpinin	0.02994	0.1827	1.2312	1.1902	0.9594	-0.0597	yes	down
metab_3840	Not Available	Not Available	Not Available	Mg(20:5(5Z,8Z,11Z,14Z,16E)-Oh(18)/0:0/0:0)	0.04615	0.2248	1.2302	1.1886	1.0422	0.0596	yes	up
metab_4779	Organic oxygen compounds	Organooxygen compounds	Carbohydrates and carbohydrate conjugates	Jasmolone Glucoside	0.04513	0.2214	1.2208	1.2663	1.0483	0.0681	yes	up
metab_7872	Organoheterocyclic compounds	Azoles	Imidazoles	Propranolol Glucuronide	0.005698	0.08283	1.2197	1.195	0.9695	-0.0447	yes	down
metab_7451	Nucleosides, nucleotides, and analogues	Purine nucleosides	Not Available	Adenosine	0.04207	0.2152	1.2179	1.2153	0.9598	-0.0592	yes	down
metab_8177	Nucleosides, nucleotides, and analogues	Pyrimidine nucleotides	Pyrimidine ribonucleotides	Cotinine Glucuronide	0.04644	0.2252	1.206	1.1824	0.9625	-0.0551	yes	down
metab_7445	Nucleosides, nucleotides, and analogues	Purine nucleotides	Cyclic purine nucleotides	3',5'-Cyclic Gmp	0.0303	0.1837	1.2058	1.1447	0.9733	-0.0391	yes	down
metab_622	Nucleosides, nucleotides, and analogues	Pyrimidine nucleotides	Cyclic pyrimidine nucleotides	Cifostodine	0.03732	0.2028	1.2037	1.16	0.9647	-0.0518	yes	down
metab_1803	-	-	-	Everninic Acid	0.04218	0.2156	1.1918	1.1721	1.0413	0.0584	yes	up
metab_5821	Organic acids and derivatives	Carboxylic acids and derivatives	Amino acids, peptides, and analogues	L-Asparagine	0.04623	0.225	1.1889	1.1446	1.0304	0.0432	yes	up
metab_8541	Organic acids and derivatives	Carboxylic acids and derivatives	Amino acids, peptides, and analogues	1-Nitro-7-Hydroxy-8-Glutathionyl-7,8-Dihydronaphthalene	0.02314	0.162	1.1835	1.1917	1.0381	0.0539	yes	up
metab_12790	Organic acids and derivatives	Carboxylic acids and derivatives	Amino acids, peptides, and analogues	Phenylacetylglutamine	0.04858	0.2293	1.1784	1.2593	0.9502	-0.0737	yes	down
metab_11267	Lipids and lipid-like molecules	Fatty Acyls	Eicosanoids	Thromboxane B3	0.03054	0.1844	1.1642	1.1621	0.9664	-0.0493	yes	down
metab_7373	Lipids and lipid-like molecules	Fatty Acyls	Fatty acids and conjugates	Itaconic Acid	0.01825	0.1467	1.1588	1.1691	0.9708	-0.0428	yes	down
metab_3600	-	-	-	Azacyclotridecan-2-One	0.00379	0.06665	1.1501	1.1202	0.9719	-0.0411	yes	down
metab_1492	-	-	-	3-Hydroxy-C10-Homoserine Lactone	0.03637	0.2008	1.138	1.1761	1.0418	0.0591	yes	up
metab_7312	Organic acids and derivatives	Hydroxy acids and derivatives	Beta hydroxy acids and derivatives	Daucic Acid	0.03776	0.2042	1.1369	1.1343	1.0319	0.0454	yes	up
metab_12820	Organic oxygen compounds	Organooxygen compounds	Carbonyl compounds	4-Ethyl-2-Hydroxy-3-Methyl-2-Cyclopenten-1-One	0.04176	0.2146	1.136	1.1062	1.0341	0.0484	yes	up
metab_13299	Organic oxygen compounds	Organooxygen compounds	Carbohydrates and carbohydrate conjugates	Beta-D-Galactopyranosyl-(1->4)-2-Amino-2-Deoxy-Beta-D-Glucopyranosyl-(1->6)-D-Mannose	0.02044	0.1534	1.1327	1.1122	0.972	-0.0409	yes	down
metab_5647	Organic acids and derivatives	Carboxylic acids and derivatives	Amino acids, peptides, and analogues	Beta-Alanine	0.02232	0.1601	1.1297	1.0934	1.0275	0.0391	yes	up
metab_11273	-	-	-	Pgk2	0.006426	0.08728	1.1283	1.0849	0.9789	-0.0307	yes	down
metab_1361	Organic acids and derivatives	Carboxylic acids and derivatives	Amino acids, peptides, and analogues	Lisinopril	0.01211	0.1214	1.1279	1.144	1.0338	0.048	yes	up
metab_8062	Organic acids and derivatives	Hydroxy acids and derivatives	Medium-chain hydroxy acids and derivatives	Pravastatin	0.001008	0.03117	1.1139	1.1119	1.0236	0.0336	yes	up
metab_11307	Organoheterocyclic compounds	Lactones	Gamma butyrolactones	5-Heptyltetrahydro-2-Oxo-3-Furancarboxylic Acid	0.017	0.1432	1.113	1.0888	0.9769	-0.0338	yes	down
metab_6949	Organic acids and derivatives	Organic sulfuric acids and derivatives	Arylsulfates	Tyramine-O-Sulfate	0.01473	0.1332	1.1127	1.1289	1.0374	0.053	yes	up
metab_5826	Organoheterocyclic compounds	Pyrrolidines	Pyrrolidones	2-Pyrrolidinone	0.01119	0.1169	1.1095	1.0512	1.0254	0.0362	yes	up
metab_9272	Lipids and lipid-like molecules	Prenol lipids	Sesquiterpenoids	Abscisic Acid	0.001914	0.04491	1.1079	1.1245	0.9718	-0.0413	yes	down
metab_2943	Lipids and lipid-like molecules	Fatty Acyls	Lineolic acids and derivatives	Dg(15:0/18:4(6Z,9Z,12Z,15Z)/0:0)	0.02386	0.1635	1.1074	1.1306	1.0263	0.0375	yes	up
metab_3609	Organoheterocyclic compounds	Oxepanes	Not Available	Limonene Oxide	0.002078	0.04703	1.1057	1.1056	0.9728	-0.0398	yes	down
metab_10069	Lipids and lipid-like molecules	Fatty Acyls	Fatty acyl glycosides	9-Hydroxy-7-Megastigmen-3-One Glucoside	0.01124	0.1171	1.1051	1.0695	0.9762	-0.0348	yes	down
metab_1990	-	-	-	3,4-Epoxycyclohexylmethyl 3,4-Epoxycyclohexanecarboxylate	0.01965	0.151	1.0973	1.1464	1.0377	0.0534	yes	up
metab_9876	Organic oxygen compounds	Organic oxides	Not Available	Polygodial	0.02023	0.1527	1.0954	1.0904	0.9657	-0.0503	yes	down
metab_14653	Organic acids and derivatives	Carboxylic acids and derivatives	Amino acids, peptides, and analogues	3-Cyano-L-Alanine	0.04286	0.2172	1.094	1.0338	1.0287	0.0408	yes	up
metab_6729	Organic acids and derivatives	Organic carbonic acids and derivatives	Ureas	3-Ureidopropionic Acid	0.04827	0.229	1.0891	1.0285	1.024	0.0342	yes	up
metab_10237	Lipids and lipid-like molecules	Glycerophospholipids	Glycerophosphoethanolamines	Pe(22:4(7Z,10Z,13Z,16Z)/18:0)	0.003	0.05936	1.0869	1.0603	0.9827	-0.0252	yes	down
metab_5588	Organic acids and derivatives	Carboxylic acids and derivatives	Amino acids, peptides, and analogues	Thr-Pro	0.03821	0.2047	1.0815	1.0826	1.0383	0.0543	yes	up
metab_9469	-	-	-	Histamine-Trifluoromethyltoluide	0.04391	0.2194	1.081	1.0226	0.9697	-0.0444	yes	down
metab_10339	-	-	-	Cer[As](D34:1)	0.006791	0.09008	1.0786	1.0835	0.9784	-0.0315	yes	down
metab_11500	-	-	-	9-Oxootre	0.02585	0.1706	1.0786	1.0323	0.9769	-0.0338	yes	down
metab_9747	Phenylpropanoids and polyketides	Flavonoids	O-methylated flavonoids	3-O-Methylkaempferol	0.02243	0.1601	1.0775	1.0672	1.0223	0.0318	yes	up
metab_1376	Organic acids and derivatives	Carboxylic acids and derivatives	Amino acids, peptides, and analogues	Histidylprolineamide	0.005131	0.07908	1.0774	1.0861	1.0254	0.0362	yes	up
metab_5129	-	-	-	N-(4-Fluoro-3-Methylphenyl)-2,4-Dimethyl-1,3-Thiazole-5-Carboxamide	0.003521	0.06466	1.0727	1.0594	0.9751	-0.0364	yes	down
metab_10232	Organic oxygen compounds	Organooxygen compounds	Ethers	Heptaethylene Glycol Monododecyl Ether	0.0008278	0.02796	1.0712	1.0539	0.9815	-0.027	yes	down
metab_11843	Organoheterocyclic compounds	Benzothiazoles	Not Available	2-Mercaptobenzothiazole	0.007274	0.0935	1.0667	1.0803	0.9736	-0.0386	yes	down
metab_11034	Lipids and lipid-like molecules	Sphingolipids	Ceramides	Cer(D18:1/14:0)	0.000897	0.02921	1.0652	1.0292	0.9855	-0.0211	yes	down
metab_9293	Benzenoids	Benzene and substituted derivatives	Benzoic acids and derivatives	Salicylic Acid	0.01319	0.1262	1.0651	1.0583	0.974	-0.038	yes	down
metab_4354	Lipids and lipid-like molecules	Prenol lipids	Sesquiterpenoids	Dihydrophaseic Acid	0.0262	0.1714	1.0644	1.0222	0.9694	-0.0449	yes	down
metab_3598	Lipids and lipid-like molecules	Steroids and steroid derivatives	Estrane steroids	(8R,9R,10S,13S,14S)-13-Methyl-1,4,5,6,7,8,9,10,11,12,14,15,16,17-Tetradecahydrocyclopenta[A]Phenanthrene	0.003268	0.06201	1.064	1.036	0.9795	-0.0299	yes	down
metab_10238	Not Available	Not Available	Not Available	Ps(22:6(5Z,8E,10Z,13Z,15E,19Z)-2Oh(7S, 17S)/18:0)	0.02084	0.1551	1.0631	1.0463	0.9745	-0.0372	yes	down
metab_4828	-	-	-	Sodium Demethylcantharidate	0.04184	0.2146	1.0607	1.0568	0.9645	-0.0521	yes	down
metab_2238	Lipids and lipid-like molecules	Prenol lipids	Triterpenoids	Hoduloside Iv	0.04624	0.225	1.0558	1.0138	0.9746	-0.0371	yes	down
metab_5823	Organic oxygen compounds	Organooxygen compounds	Carbonyl compounds	Malonic Semialdehyde	0.03068	0.1846	1.0533	1.0419	1.0284	0.0404	yes	up
metab_11213	Lipids and lipid-like molecules	Steroids and steroid derivatives	Hydroxysteroids	(8S,9S,10S,11S,13S,14S,17R)-11,17-Dihydroxy-17-(2-Hydroxyacetyl)-10,13-Dimethyl-1,4,5,6,7,8,9,11,12,14,15,16-Dodecahydrocyclopenta[A]Phenanthrene-2,3-Dione	0.03144	0.1871	1.053	1.0071	0.9768	-0.0339	yes	down
metab_8247	Organic acids and derivatives	Keto acids and derivatives	Short-chain keto acids and derivatives	Ketoleucine	4.004e-05	0.003809	1.0481	1.0272	0.9793	-0.0302	yes	down
metab_10034	Organic oxygen compounds	Organooxygen compounds	Carbonyl compounds	(Z)-3-Methyl-2-(2-Pentenyl)-2-Cyclopenten-1-One	0.0257	0.1701	1.0474	1.0273	0.9768	-0.0339	yes	down
metab_11915	-	-	-	20-Carboxy-Ltb4	0.003559	0.06495	1.0472	1.0138	0.9808	-0.028	yes	down
metab_11101	Lipids and lipid-like molecules	Sphingolipids	Glycosphingolipids	Galactosylceramide (D18:1/14:0)	0.003482	0.06434	1.0447	1.0188	0.9844	-0.0227	yes	down
metab_9517	Lipids and lipid-like molecules	Fatty Acyls	Fatty acids and conjugates	Dodecanedioic Acid	0.03204	0.1885	1.0417	1.0304	1.0281	0.04	yes	up
metab_14236	Organic acids and derivatives	Carboxylic acids and derivatives	Dicarboxylic acids and derivatives	Malonic Acid	0.03843	0.2053	1.0341	0.9547	1.0227	0.0323	yes	up
metab_9578	Lipids and lipid-like molecules	Fatty Acyls	Fatty acyl glycosides	Blumenol C Glucoside	0.01833	0.1469	1.0251	0.9657	0.9789	-0.0308	yes	down
metab_2700	-	-	-	Farnesyl Acetone	0.00257	0.05445	1.0228	0.9968	0.9838	-0.0236	yes	down
metab_2693	Organic oxygen compounds	Organooxygen compounds	Carbonyl compounds	Isophorone	0.001214	0.03492	1.0092	0.9979	0.9775	-0.0329	yes	down

## Sheet: Table S4D
Table S4D The DAMs in ACC10 vs NP group
NO.	Metab ID	HMDB Superclass	HMDB Class	HMDB Subclass	Metabolite	P_value	FDR	VIP_pred_OPLS-DA	VIP_PLS-DA	FC(ACC10/NP)	Log2FC(ACC10/NP)	Significant	Regulate
1	metab_7386	Organic acids and derivatives	Carboxylic acids and derivatives	Amino acids, peptides, and analogues	(1R,4R,5S,6R)-4-Amino-2-Oxabicyclo[3.1.0]Hexane-4,6-Dicarboxylic Acid	2.12e-16	8.475e-13	4.2286	4.2008	2.0181	1.013	yes	up
2	metab_8935	Organic acids and derivatives	Hydroxy acids and derivatives	Medium-chain hydroxy acids and derivatives	10-Hydroxydecanoic Acid	4.743e-06	0.0002122	3.9632	3.9447	13.3212	3.7357	yes	up
3	metab_4478	Lipids and lipid-like molecules	Steroids and steroid derivatives	Steroidal glycosides	Estriol 3-Sulfate 16-Glucuronide	3.829e-10	9.416e-08	3.6697	3.6348	1.8488	0.8866	yes	up
4	metab_5390	Organoheterocyclic compounds	Azoles	Pyrazoles	Antipyrine	7.512e-06	0.0002925	3.5175	3.4492	2.3421	1.2278	yes	up
5	metab_1854	Phenylpropanoids and polyketides	Coumarins and derivatives	Furanocoumarins	Apiumoside	0.0001023	0.001594	3.4123	3.3606	1.8416	0.881	yes	up
6	metab_5437	-	-	-	Ala Asn Glu	1.825e-09	3.648e-07	3.3872	3.3544	1.5454	0.628	yes	up
7	metab_11432	-	-	-	7-Hydroxy-3'-Methoxyflavone	6.762e-08	6.991e-06	3.3837	3.3476	1.49	0.5753	yes	up
8	metab_7359	Organic acids and derivatives	Carboxylic acids and derivatives	Amino acids, peptides, and analogues	Oxidized Glutathione	0.01373	0.04015	3.2986	3.2664	1.9568	0.9685	yes	up
9	metab_5356	Benzenoids	Phenol ethers	Anisoles	Edotecarin	0.0004761	0.003768	3.2843	3.2589	1.7832	0.8345	yes	up
10	metab_4526	Organic oxygen compounds	Organooxygen compounds	Carbohydrates and carbohydrate conjugates	Dide-O-Methyl-4-O-Alpha-D-Glucopyranosylsimmondsin	1.438e-09	2.923e-07	3.2323	3.2005	1.5768	0.657	yes	up
11	metab_4570	-	-	-	Chrysin-7-O-Glucuronide	3.013e-05	0.0007482	3.1693	3.1098	1.6846	0.7524	yes	up
12	metab_3755	-	-	-	6-Hydroxy-4'-Methoxyflavone	1.201e-09	2.483e-07	3.0965	3.0711	1.507	0.5917	yes	up
13	metab_2622	-	-	-	Formononetin 7-O-Glucoside-6''-O-Malonate	7.569e-06	0.0002937	3.081	3.0434	1.4086	0.4942	yes	up
14	metab_1848	Phenylpropanoids and polyketides	Flavonoids	O-methylated flavonoids	Tamarixetin	4.377e-09	7.291e-07	3.0469	3.0293	1.5778	0.6579	yes	up
15	metab_8813	-	-	-	7,3'-Dihydroxyflavone	7.611e-07	5.186e-05	2.9498	2.9189	1.6785	0.7472	yes	up
16	metab_14073	Organic oxygen compounds	Organooxygen compounds	Carbohydrates and carbohydrate conjugates	Trehalose	0.002001	0.009692	2.9304	2.9615	1.6618	0.7327	yes	up
17	metab_13918	Organic acids and derivatives	Carboxylic acids and derivatives	Amino acids, peptides, and analogues	Tetrahydrodipicolinate	1.501e-11	7.5e-09	2.924	2.9237	1.617	0.6933	yes	up
18	metab_1817	Organic acids and derivatives	Carboxylic acids and derivatives	Amino acids, peptides, and analogues	Asp F I	1.28e-05	0.0004312	2.9233	2.89	1.4793	0.5649	yes	up
19	metab_1791	-	-	-	Isoflavone Base+1O,1Meo,O-Hex+C7H12No	4.965e-13	4.253e-10	2.912	2.8866	1.4114	0.4971	yes	up
20	metab_10037	Phenylpropanoids and polyketides	Flavonoids	Flavones	3,7,4'-Trihydroxyflavone	1.862e-07	1.692e-05	2.9017	2.8742	1.4014	0.4869	yes	up
21	metab_931	Organic acids and derivatives	Carboxylic acids and derivatives	Amino acids, peptides, and analogues	1-(Malonylamino)Cyclopropanecarboxylic Acid	3.847e-10	9.416e-08	2.8582	2.8398	1.2663	0.3407	yes	up
22	metab_14102	Organoheterocyclic compounds	Imidazopyrimidines	Purines and purine derivatives	Dyphylline	5.141e-05	0.001052	2.8334	2.8008	1.3907	0.4758	yes	up
23	metab_5167	Lipids and lipid-like molecules	Prenol lipids	Terpene lactones	Reynosin	1.065e-08	1.469e-06	2.7817	2.7339	1.4237	0.5097	yes	up
24	metab_13989	Organoheterocyclic compounds	Dithiolanes	Lipoamides	Lipoamide	3.226e-09	5.861e-07	2.7431	2.7295	1.3029	0.3817	yes	up
25	metab_11830	Lipids and lipid-like molecules	Prenol lipids	Terpene glycosides	Canavalioside	1.047e-10	3.304e-08	2.7335	2.7042	1.3652	0.4491	yes	up
26	metab_8311	Organoheterocyclic compounds	Tetrahydroisoquinolines	Not Available	Methylsulfonyl 4-[(2-Carbamimidoyl-3,4-Dihydro-1H-Isoquinolin-7-Yl)Oxymethyl]-1-Pyridin-4-Ylpiperidine-4-Carboxylate	0.0005833	0.004331	2.7153	2.6794	0.6812	-0.5539	yes	down
27	metab_852	Organoheterocyclic compounds	Furans	Furoic acid and derivatives	2,5-Furandicarboxylic Acid	0.0001249	0.001779	2.7098	2.6938	0.6667	-0.5848	yes	down
28	metab_10061	Benzenoids	Anthracenes	Anthraquinones	Hydroxyanthraquinone	3.748e-07	2.9e-05	2.6907	2.6637	1.3184	0.3987	yes	up
29	metab_3533	-	-	-	7-O-Methylchrysin	2.561e-11	1.059e-08	2.6834	2.6685	1.3207	0.4013	yes	up
30	metab_930	Organic acids and derivatives	Carboxylic acids and derivatives	Amino acids, peptides, and analogues	2-Aminomuconic Acid Semialdehyde	1.896e-11	8.863e-09	2.6752	2.6562	1.2414	0.312	yes	up
31	metab_1883	Organoheterocyclic compounds	Naphthopyrans	Not Available	Borapetoside	3.191e-05	0.0007763	2.6704	2.6326	1.3924	0.4776	yes	up
32	metab_14342	Organoheterocyclic compounds	Imidazodiazepines	Not Available	Pentostatin	1.845e-06	0.0001044	2.6676	2.6339	1.3095	0.389	yes	up
33	metab_1916	Lipids and lipid-like molecules	Prenol lipids	Sesquiterpenoids	Aflatoxin P1	1.327e-05	0.0004367	2.6554	2.6237	1.4199	0.5058	yes	up
34	metab_9124	-	-	-	Methyl 2-(2,6-Dihydroxy-4-Methylbenzoyl)-3,5-Dihydroxybenzoate	2.127e-06	0.0001166	2.6399	2.6192	1.3537	0.4369	yes	up
35	metab_1896	Organoheterocyclic compounds	Lactams	Beta lactams	Cefminox	6.965e-06	0.0002812	2.6172	2.5898	1.3695	0.4536	yes	up
36	metab_13983	Organic acids and derivatives	Carboxylic acids and derivatives	Amino acids, peptides, and analogues	6-Oxopiperidine-2-Carboxylic Acid	3.741e-10	9.416e-08	2.6159	2.6017	1.2079	0.2724	yes	up
37	metab_910	Phenylpropanoids and polyketides	Isoflavonoids	Hydroxyisoflavonoids	Glycycoumarin	5.76e-12	3.454e-09	2.6017	2.5794	1.331	0.4125	yes	up
38	metab_12240	-	-	-	Apigenin 7-Galacturonide	0.003105	0.01315	2.5819	2.545	1.374	0.4584	yes	up
39	metab_5030	Lipids and lipid-like molecules	Glycerolipids	Monoradylglycerols	1-O-Pentylglycerol	0.0001352	0.001845	2.5627	2.5334	1.4439	0.53	yes	up
40	metab_14080	Lipids and lipid-like molecules	Steroids and steroid derivatives	Hydroxysteroids	Galactinol	0.0004834	0.003806	2.5576	2.5738	1.3968	0.4821	yes	up
41	metab_4377	Phenylpropanoids and polyketides	Coumarins and derivatives	Not Available	Capillarisin	2.83e-06	0.0001456	2.5552	2.5211	1.3761	0.4606	yes	up
42	metab_1845	Phenylpropanoids and polyketides	Flavonoids	Flavonoid glycosides	Poncirin	7.344e-05	0.001324	2.5445	2.5049	1.3558	0.4392	yes	up
43	metab_4930	-	-	-	N-Octanoyl-Dl-Homoserine Lactone	1.201e-05	0.0004126	2.543	2.5015	1.369	0.4531	yes	up
44	metab_1482	Phenylpropanoids and polyketides	Cinnamic acids and derivatives	Hydroxycinnamic acids and derivatives	Simmondsin 2'-Ferulate	0.0008218	0.005427	2.525	2.4914	0.7173	-0.4794	yes	down
45	metab_1813	Phenylpropanoids and polyketides	Flavonoids	Flavonoid glycosides	Phloretin 2'-O-Glucuronide	0.0002973	0.002835	2.5058	2.4707	1.3913	0.4764	yes	up
46	metab_12544	Organic acids and derivatives	Keto acids and derivatives	Medium-chain keto acids and derivatives	2-Keto-6-Acetamidocaproate	8.96e-06	0.0003316	2.4961	2.4734	1.3993	0.4847	yes	up
47	metab_1503	Organic acids and derivatives	Carboxylic acids and derivatives	Amino acids, peptides, and analogues	((2R,3S,4S,5R,6S)-6-(2-(3-(Benzofuran-5-Yl)Propanoyl)-3-Hydroxy-5-Methylphenoxy)-3,4,5-Trihydroxytetrahydro-2H-Pyran-2-Yl)Methyl Methyl Carbonate	0.002073	0.009921	2.4804	2.4455	0.72	-0.4739	yes	down
48	metab_11294	-	-	-	7-Hydroxy-2'-Methoxyflavone	3.412e-06	0.0001698	2.479	2.4634	1.2963	0.3744	yes	up
49	metab_7289	Organoheterocyclic compounds	Naphthopyrans	Naphthopyranones	Cassiaside	0.0001427	0.001898	2.4602	2.4972	1.3217	0.4024	yes	up
50	metab_5407	Phenylpropanoids and polyketides	Flavonoids	Flavonoid glycosides	Aromadendrin 3-Rhamnoside	0.0001491	0.001942	2.4581	2.4203	1.2927	0.3704	yes	up
51	metab_4724	Benzenoids	Phenols	4-alkoxyphenols	4-Hydroxy-Alprenolol	0.0001191	0.00174	2.4537	2.3983	1.3919	0.4771	yes	up
52	metab_4323	Phenylpropanoids and polyketides	Flavonoids	Flavonoid glycosides	Malonylglycitin	1.177e-05	0.0004078	2.4349	2.3996	1.3145	0.3945	yes	up
53	metab_5358	Phenylpropanoids and polyketides	Flavonoids	Flavans	Epigallocatechin	0.001705	0.008731	2.4173	2.393	1.3044	0.3834	yes	up
54	metab_4914	Lipids and lipid-like molecules	Fatty Acyls	Fatty acid esters	4-Hydroxyhexanoycarnitine	0.0003135	0.002944	2.4066	2.3627	1.3471	0.4299	yes	up
55	metab_4964	Lipids and lipid-like molecules	Fatty Acyls	Fatty acid esters	3-Hydroxyhexanoylcarnitine	6.442e-05	0.001222	2.3924	2.3374	1.3623	0.4461	yes	up
56	metab_8077	Organoheterocyclic compounds	Isoindoles and derivatives	Isoindolines	5-Hydroxy-3-(4-Hydroxyphenyl)-6-Methoxy-7-[(2S,4S,5S)-3,4,5-Trihydroxy-6-(Hydroxymethyl)Oxan-2-Yl]Oxychromen-4-One	0.001563	0.008229	2.3774	2.2958	0.76	-0.3958	yes	down
57	metab_1395	Organic acids and derivatives	Carboxylic acids and derivatives	Amino acids, peptides, and analogues	L-Pyridosine	0.001196	0.006911	2.3605	2.315	1.3225	0.4032	yes	up
58	metab_12263	-	-	-	2',6-Dihydroxyflavanone	5.177e-08	5.644e-06	2.3565	2.3318	1.2089	0.2737	yes	up
59	metab_4712	Organoheterocyclic compounds	Diazines	Pyrazines	Ethylisopropylamiloride	5.805e-07	4.071e-05	2.3473	2.3415	1.2641	0.3381	yes	up
60	metab_11425	Lipids and lipid-like molecules	Steroids and steroid derivatives	Androstane steroids	19-Hydroxyandrost-4-Ene-3,17-Dione	0.0003385	0.003059	2.3416	2.2817	0.7797	-0.359	yes	down
61	metab_1018	Nucleosides, nucleotides, and analogues	5''-deoxyribonucleosides	Not Available	(S)-5'-Deoxy-5'-(Methylsulfinyl)Adenosine	0.0001491	0.001942	2.3404	2.3178	1.2182	0.2848	yes	up
62	metab_1863	-	-	-	Formononetin-7-O-Glucoside	9.404e-07	6.162e-05	2.3196	2.284	1.2027	0.2663	yes	up
63	metab_10539	Organoheterocyclic compounds	Diazinanes	Piperazines	Atevirdine	0.02523	0.06296	2.3101	2.2729	1.7034	0.7684	yes	up
64	metab_5236	Organic acids and derivatives	Carboxylic acids and derivatives	Amino acids, peptides, and analogues	4,5-Seco-Dopa	9.912e-05	0.001568	2.3014	2.2853	1.3039	0.3829	yes	up
65	metab_4334	Phenylpropanoids and polyketides	Isoflavonoids	Furanoisoflavonoids	Medicarpin 3-O-(6'-Malonylglucoside)	0.004747	0.01795	2.288	2.2337	1.3009	0.3795	yes	up
66	metab_8917	Organic oxygen compounds	Organooxygen compounds	Carbohydrates and carbohydrate conjugates	Raffinose	0.04034	0.09087	2.2805	2.2168	1.5803	0.6602	yes	up
67	metab_4400	Lipids and lipid-like molecules	Prenol lipids	Monoterpenoids	1,5-Dimethyl-1-Vinyl-4-Hexenyl Acetate	6.263e-05	0.0012	2.2685	2.2556	1.3681	0.4521	yes	up
68	metab_14368	Organic oxygen compounds	Organooxygen compounds	Carbohydrates and carbohydrate conjugates	Sucrose	0.000281	0.002746	2.2169	2.2435	1.2751	0.3507	yes	up
69	metab_6884	Organic acids and derivatives	Hydroxy acids and derivatives	Beta hydroxy acids and derivatives	3-Hydroxypyruvic Acid	0.001	0.006177	2.2152	2.1895	1.4275	0.5135	yes	up
70	metab_3445	-	-	-	15-Methylprostaglandin E1	2.75e-05	0.0007107	2.213	2.1776	1.1904	0.2515	yes	up
71	metab_5441	Organic acids and derivatives	Carboxylic acids and derivatives	Amino acids, peptides, and analogues	(2S,3'S)-Alpha-Amino-2-Carboxy-5-Oxo-1-Pyrrolidinebutanoic Acid	1.095e-06	6.874e-05	2.2073	2.2318	1.2297	0.2984	yes	up
72	metab_9966	Not Available	Not Available	Not Available	Dg(Pgj2/0:0/I-15:0)	0.004274	0.01655	2.206	2.1707	0.7692	-0.3785	yes	down
73	metab_1895	-	-	-	6'-Malonyl Ononin	3.065e-07	2.479e-05	2.1897	2.1658	1.1425	0.1922	yes	up
74	metab_4383	-	-	-	6,2'-Dihydroxyflavanone	8.773e-06	0.0003278	2.1893	2.1814	1.2202	0.2871	yes	up
75	metab_11596	Alkaloids and derivatives	Ergoline and derivatives	Lysergic acids and derivatives	Ergocornine	5.879e-05	0.001152	2.1868	2.1382	0.8387	-0.2537	yes	down
76	metab_2736	Phenylpropanoids and polyketides	Isoflavonoids	O-methylated isoflavonoids	Formononetin	1.5e-08	1.893e-06	2.1854	2.1624	1.1149	0.157	yes	up
77	metab_14317	Organic oxygen compounds	Organooxygen compounds	Carbohydrates and carbohydrate conjugates	Ethyl Glucuronide	5.596e-08	5.991e-06	2.1848	2.1563	1.236	0.3057	yes	up
78	metab_12168	-	-	-	Haematoxylin	3.851e-07	2.941e-05	2.1744	2.1658	1.1851	0.245	yes	up
79	metab_11707	-	-	-	(2E)-2-[Hydroxy(Phenyl)Methylidene]-6-Methoxy-1-Benzofuran-3-One	1.098e-08	1.497e-06	2.1685	2.1439	1.1456	0.1961	yes	up
80	metab_9657	-	-	-	7-Hydroxy-3(4-Methoxyphenyl)Coumarin	2.074e-07	1.842e-05	2.1612	2.1363	1.193	0.2547	yes	up
81	metab_9217	Organoheterocyclic compounds	Pyridines and derivatives	Hydropyridines	Diethyl 2,3,4-Trimethyl-2,3-Dihydropyridine-5,6-Dicarboxylate	5.774e-05	0.001137	2.1605	2.1236	1.3323	0.4139	yes	up
82	metab_4255	-	-	-	Lys His Lys	4.846e-05	0.001014	2.1549	2.108	0.8313	-0.2665	yes	down
83	metab_11385	Lipids and lipid-like molecules	Prenol lipids	Triterpenoids	Forskolin	0.0001658	0.002047	2.1543	2.0957	0.8166	-0.2923	yes	down
84	metab_4173	Phenylpropanoids and polyketides	Coumarins and derivatives	Furanocoumarins	Isoimperatorin	9.184e-05	0.001508	2.1493	2.1365	1.1695	0.2259	yes	up
85	metab_4363	-	-	-	Gdc-0879	0.002321	0.01066	2.149	2.1057	0.7665	-0.3836	yes	down
86	metab_10009	Not Available	Not Available	Not Available	Dg(20:4(6E,8Z,11Z,13E)-2Oh(5S,15S)/13:0/0:0)	0.0002222	0.002422	2.1408	2.1019	0.8264	-0.2752	yes	down
87	metab_5435	Organic oxygen compounds	Organooxygen compounds	Carbohydrates and carbohydrate conjugates	6-(Methylsulfonyl)Hexyl Glucosinolate	1.975e-05	0.0005669	2.1356	2.1038	1.2037	0.2675	yes	up
88	metab_9121	Phenylpropanoids and polyketides	Flavonoids	Flavones	Kaempferol	0.000205	0.002321	2.1326	2.096	1.2471	0.3186	yes	up
89	metab_8984	Phenylpropanoids and polyketides	Flavonoids	Flavans	Norartocarpanone	7.959e-05	0.001393	2.1316	2.1113	1.2198	0.2867	yes	up
90	metab_4446	Phenylpropanoids and polyketides	Flavonoids	Flavonoid glycosides	Baicalin	0.0004032	0.003398	2.1266	2.0993	1.2174	0.2837	yes	up
91	metab_10018	Not Available	Not Available	Not Available	Dg(A-13:0/0:0/Pge2)	1.876e-06	0.0001056	2.0895	2.0568	0.8579	-0.2211	yes	down
92	metab_10271	Lignans, neolignans and related compounds	Dibenzylbutane lignans	Not Available	Niranthin	0.002878	0.01246	2.0764	2.0285	0.7888	-0.3423	yes	down
93	metab_7389	Organic acids and derivatives	Carboxylic acids and derivatives	Amino acids, peptides, and analogues	Leucyl-Threonine	0.0004971	0.003881	2.0759	2.0557	0.7992	-0.3234	yes	down
94	metab_1951	Phenylpropanoids and polyketides	Coumarins and derivatives	Not Available	4-Methylcoumarin	0.001105	0.006597	2.0744	2.0388	1.3188	0.3993	yes	up
95	metab_1720	-	-	-	4,7-Dihydroxyflavone	0.000178	0.002136	2.0621	2.038	1.2909	0.3684	yes	up
96	metab_2879	Not Available	Not Available	Not Available	Dg(20:4(5Z,8Z,11Z,14Z)-Oh(19S)/14:0/0:0)	0.0005205	0.003998	2.0557	2.0255	1.1956	0.2577	yes	up
97	metab_11303	-	-	-	7-Hydroxy-2'-Methoxyisoflavone	4.272e-09	7.216e-07	2.0547	2.0333	1.0957	0.1319	yes	up
98	metab_8986	Organoheterocyclic compounds	Benzopyrans	1-benzopyrans	Baicalein	4.078e-05	0.0009053	2.0501	2.0235	1.2391	0.3093	yes	up
99	metab_4818	Lipids and lipid-like molecules	Fatty Acyls	Fatty acid esters	Dodec-7-Enedioylcarnitine	0.005337	0.01963	2.0413	2.0079	1.2701	0.3449	yes	up
100	metab_9173	Organoheterocyclic compounds	Benzodiazepines	Not Available	4'-Hydroxyclobazam	0.0002589	0.002613	2.0407	1.9853	1.1984	0.2611	yes	up
101	metab_7260	Lipids and lipid-like molecules	Fatty Acyls	Fatty acids and conjugates	2-Hydroxyadipic Acid	1.659e-05	0.0005116	2.0372	2.0166	1.2197	0.2865	yes	up
102	metab_11305	Phenylpropanoids and polyketides	Flavonoids	Flavans	(2R,3R)-Pinobanksin	3.719e-09	6.559e-07	2.0351	2.0136	1.1272	0.1728	yes	up
103	metab_10960	-	-	-	Oleoyl-L-Alpha-Lysophosphatidic Acid	0.0001184	0.001738	2.0232	2.0048	0.8393	-0.2527	yes	down
104	metab_5585	Organic acids and derivatives	Carboxylic acids and derivatives	Amino acids, peptides, and analogues	Aspartyl-Proline	9.877e-05	0.001568	2.0231	2.0598	1.2482	0.3198	yes	up
105	metab_5605	Phenylpropanoids and polyketides	Isoflavonoids	Isoflavans	5,7,8-Trihydroxyflavanone 7-Glucoside	2.213e-05	0.0006034	2.017	1.9813	1.1615	0.216	yes	up
106	metab_1960	Organic oxygen compounds	Organooxygen compounds	Carbohydrates and carbohydrate conjugates	Validamycin A	0.002998	0.01281	2.0142	1.9745	1.184	0.2437	yes	up
107	metab_7268	Nucleosides, nucleotides, and analogues	5''-deoxyribonucleosides	5''-deoxy-5''-thionucleosides	2-[(2-Fluorophenyl)Sulfanylmethyl]-5-[6-[(2-Hydroxycyclopentyl)Amino]Purin-9-Yl]Oxolane-3,4-Diol	1.544e-05	0.000487	2.0006	1.9653	1.1595	0.2135	yes	up
108	metab_1619	Benzenoids	Phenol ethers	Not Available	Esmolol	0.006103	0.02164	1.9996	1.9867	1.2654	0.3396	yes	up
109	metab_4077	Phenylpropanoids and polyketides	Isoflavonoids	Isoflav-2-enes	Glycitein	1.265e-06	7.741e-05	1.999	1.9698	1.1433	0.1933	yes	up
110	metab_4792	-	-	-	2-Hydroxyalternariol-9-Methyl Ether	0.003049	0.01296	1.9918	1.9419	0.7818	-0.3551	yes	down
111	metab_2119	Benzenoids	Benzene and substituted derivatives	Benzoyl derivatives	4-Methoxybenzaldehyde	9.759e-05	0.001561	1.9865	1.9778	1.1768	0.2348	yes	up
112	metab_12495	Phenylpropanoids and polyketides	Flavonoids	Flavans	Eriodictyol	0.0001124	0.001685	1.9857	1.9682	1.2001	0.2631	yes	up
113	metab_834	Phenylpropanoids and polyketides	Flavonoids	Flavonoid glycosides	(2R,3R)-3,3',4',7-Tetrahydroxyflavanone 7-O-Alpha-L-Rhamnopyranoside	9.062e-06	0.0003344	1.9856	1.9511	1.1483	0.1994	yes	up
114	metab_7455	Organoheterocyclic compounds	Triazines	1,2,4-triazines	Ferene Triazine	9.42e-05	0.001533	1.98	1.9609	1.1277	0.1734	yes	up
115	metab_8714	-	-	-	Tanshinone Iia Sulfonate	0.006014	0.02139	1.9771	1.9407	1.2268	0.2949	yes	up
116	metab_11521	Not Available	Not Available	Not Available	Dg(I-13:0/0:0/5-Iso Pgf2Vi)	0.004448	0.01709	1.9711	1.9508	0.8086	-0.3065	yes	down
117	metab_9521	-	-	-	2'-Methoxyformonetin	4.122e-05	0.0009087	1.9711	1.9465	1.1582	0.2119	yes	up
118	metab_11526	Lipids and lipid-like molecules	Prenol lipids	Sesquiterpenoids	Zerumbone	0.00325	0.0136	1.9707	1.9598	0.7711	-0.375	yes	down
119	metab_2102	-	-	-	7-Beta-Hydroxylathyrol	1.098e-05	0.0003907	1.9645	1.9708	0.8465	-0.2404	yes	down
120	metab_12034	Phenylpropanoids and polyketides	Coumarins and derivatives	Furanocoumarins	(3S,7R)-16-Hydroxy-11-Methoxy-6,8,19-Trioxapentacyclo[10.7.0.02,9.03,7.013,17]Nonadeca-1,4,9,11,13(17)-Pentaen-18-One	2.259e-06	0.000122	1.9636	1.9388	1.1655	0.2209	yes	up
121	metab_9434	Lipids and lipid-like molecules	Prenol lipids	Diterpenoids	Tanshinol A	0.005	0.01866	1.9482	1.9125	1.2576	0.3307	yes	up
122	metab_1393	Lipids and lipid-like molecules	Fatty Acyls	Fatty acids and conjugates	5,8,11-Eicosatrienoic Acid	0.001097	0.006569	1.9405	1.925	1.2615	0.3351	yes	up
123	metab_11646	Phenylpropanoids and polyketides	Isoflavonoids	O-methylated isoflavonoids	Biochanin A	1.156e-06	7.183e-05	1.9385	1.9111	1.1225	0.1667	yes	up
124	metab_4880	Benzenoids	Phenols	Tyrosols and derivatives	Betaxolol	0.005863	0.02102	1.9384	1.9295	1.2453	0.3165	yes	up
125	metab_1876	Lipids and lipid-like molecules	Prenol lipids	Diterpenoids	Oryzalexin A	0.00597	0.02131	1.938	1.908	0.7984	-0.3248	yes	down
126	metab_1630	-	-	-	3-Desoxy-3,4-Methylenedioxy Pyrovalerone	0.01004	0.03171	1.9282	1.8705	1.2466	0.318	yes	up
127	metab_5394	-	-	-	Pyridoxine+O-Hex	0.0006625	0.004681	1.9256	1.9036	1.194	0.2558	yes	up
128	metab_4314	-	-	-	3-Fluoro-4-Methoxy-N-([1,2,4]Triazolo[4,3-A]Pyridin-8-Yl)Benzamide	0.0001028	0.001596	1.9198	1.9197	1.1503	0.2021	yes	up
129	metab_1722	Lipids and lipid-like molecules	Fatty Acyls	Fatty acyl thioesters	S-(2-Methylbutanoyl)-Dihydrolipoamide	0.03568	0.08239	1.9127	1.9146	1.275	0.3505	yes	up
130	metab_1332	Phenylpropanoids and polyketides	Macrolides and analogues	Zearalenones	(S,E)-Zearalenone	0.01516	0.04326	1.895	1.8713	1.2605	0.3341	yes	up
131	metab_4738	Phenylpropanoids and polyketides	Macrolides and analogues	Not Available	Ethylene Brassylate	0.0002859	0.002773	1.894	1.8604	0.8346	-0.2608	yes	down
132	metab_1428	-	-	-	Triisopropanolamine	1.495e-05	0.0004757	1.8879	1.8754	1.189	0.2497	yes	up
133	metab_4185	-	-	-	3,7-Dihydroxyflavone	2.318e-06	0.0001234	1.8877	1.8623	1.1475	0.1985	yes	up
134	metab_9316	Phenylpropanoids and polyketides	Isoflavonoids	Isoflavonoid C-glycosides	Puerarin	7.72e-06	0.0002958	1.8854	1.8577	1.1431	0.1929	yes	up
135	metab_8359	-	-	-	Okanin-4'-O-Glucoside	0.00222	0.01032	1.8724	1.8193	0.8644	-0.2102	yes	down
136	metab_11914	Organic oxygen compounds	Organooxygen compounds	Carbohydrates and carbohydrate conjugates	Alpha-D-Xylopyranosyl-(1->6)-Beta-D-Glucopyranosyl-(1->4)-D-Glucose	0.01172	0.03559	1.8675	1.8141	1.2326	0.3017	yes	up
137	metab_4850	Organoheterocyclic compounds	Indoles and derivatives	Pyridoindoles	Biriperone	0.04409	0.09714	1.862	1.8611	1.2994	0.3778	yes	up
138	metab_11491	Lipids and lipid-like molecules	Fatty Acyls	Fatty acids and conjugates	3-Methyl-5-Pentyl-2-Furanheptanoic Acid	3.975e-05	0.0008911	1.8581	1.8231	0.881	-0.1828	yes	down
139	metab_7303	Organoheterocyclic compounds	Furans	Furoic acid and derivatives	2-Furoic Acid	9.94e-05	0.001568	1.8512	1.8397	0.8912	-0.1662	yes	down
140	metab_2107	Benzenoids	Benzene and substituted derivatives	Phenylpropanes	(2S,3S)-2-(2,4-Difluorophenyl)-3-Methylsulfonyl-1-(1,2,4-Triazol-1-Yl)Butan-2-Ol	1.313e-08	1.693e-06	1.8493	1.8287	1.1176	0.1604	yes	up
141	metab_9646	-	-	-	2-Hydroxyanthraquinone	5.983e-09	9.198e-07	1.8369	1.8186	1.1334	0.1807	yes	up
142	metab_12315	-	-	-	Naringenin-7-O-Beta-D-Glucuronide	0.006691	0.02323	1.836	1.8157	1.2906	0.368	yes	up
143	metab_9252	Phenylpropanoids and polyketides	Flavonoids	Flavonoid glycosides	Liquiritin	0.0003615	0.003188	1.8337	1.8145	1.1617	0.2162	yes	up
144	metab_13144	Organic acids and derivatives	Carboxylic acids and derivatives	Carboxylic acid derivatives	2-Hydroxyethyl Methacrylate	0.02398	0.06079	1.8335	1.8277	1.3155	0.3956	yes	up
145	metab_2013	Phenylpropanoids and polyketides	Flavonoids	Flavonoid glycosides	Apigenin 7-Di-O-Xyloside	0.00243	0.01102	1.8299	1.7974	1.1726	0.2298	yes	up
146	metab_7306	Organic acids and derivatives	Carboxylic acids and derivatives	Tricarboxylic acids and derivatives	Citric Acid	0.0001294	0.001814	1.8256	1.8152	0.9141	-0.1296	yes	down
147	metab_9647	Phenylpropanoids and polyketides	Flavonoids	Flavones	Resokaempherol	6.567e-08	6.848e-06	1.8253	1.8086	1.1354	0.1831	yes	up
148	metab_4793	Nucleosides, nucleotides, and analogues	Pyrimidine nucleosides	Pyrimidine 2'',3''-dideoxyribonucleosides	4-Amino-1-[(2R,5R)-5-(Hydroxymethyl)-4-Sulfanyloxolan-2-Yl]Pyrimidin-2-One	0.01015	0.03195	1.8232	1.7942	0.7725	-0.3724	yes	down
149	metab_14394	Organic oxygen compounds	Organooxygen compounds	Carbohydrates and carbohydrate conjugates	N-(1-Deoxy-1-Fructosyl)Glycine	0.0006466	0.004605	1.8203	1.8128	1.1445	0.1947	yes	up
150	metab_12138	Benzenoids	Benzene and substituted derivatives	Diphenylethers	Fenoprofen	0.0003568	0.003154	1.8155	1.8065	1.1683	0.2245	yes	up
151	metab_11178	Lipids and lipid-like molecules	Fatty Acyls	Fatty acids and conjugates	Ricinoleic Acid	4.02e-07	3.051e-05	1.8114	1.8037	0.8976	-0.1559	yes	down
152	metab_9359	Phenylpropanoids and polyketides	Flavonoids	Flavans	Liquiritigenin	1.976e-05	0.0005669	1.8103	1.8007	1.1242	0.1689	yes	up
153	metab_1115	Nucleosides, nucleotides, and analogues	Purine nucleotides	Purine ribonucleotides	Biotinyl-5'-Amp	0.0211	0.05518	1.8062	1.7962	1.2014	0.2647	yes	up
154	metab_1437	Organic acids and derivatives	Carboxylic acids and derivatives	Amino acids, peptides, and analogues	Ulimorelin	0.00219	0.01025	1.8056	1.7875	1.1881	0.2486	yes	up
155	metab_11714	Phenylpropanoids and polyketides	Cinnamic acids and derivatives	Hydroxycinnamic acids and derivatives	P-Coumaroyltriacetic Acid Lactone	1.196e-08	1.594e-06	1.8038	1.7846	1.0976	0.1344	yes	up
156	metab_13346	Lipids and lipid-like molecules	Steroids and steroid derivatives	Hydroxysteroids	16Alpha-Hydroxyprednisolone	0.0009769	0.006073	1.7978	1.7659	1.1564	0.2096	yes	up
157	metab_9746	-	-	-	(2E)-5-(3-Hydroxy-2,3-Dimethylbicyclo[2.2.1]Hept-2-Yl)-2-Methyl-2-Pentenoic Acid	4.98e-06	0.0002196	1.7963	1.7813	0.8855	-0.1755	yes	down
158	metab_1929	-	-	-	4-Methyl-N-(2-Propan-2-Yl-[1,2,4]Triazolo[1,5-A]Pyridin-8-Yl)Benzamide	0.01048	0.0327	1.7943	1.784	0.8152	-0.2947	yes	down
159	metab_428	-	-	-	Aceclidine	0.003678	0.01487	1.7928	1.769	1.1901	0.2511	yes	up
160	metab_1441	Lipids and lipid-like molecules	Fatty Acyls	Fatty acids and conjugates	Dihomo-Gamma-Linolenic Acid	0.007153	0.02454	1.7915	1.7667	1.25	0.3219	yes	up
161	metab_11297	-	-	-	8-(3-Oxo-2-(Pent-2-Enyl) Cyclopentenyl)Octanoic Acid	4.391e-05	0.0009441	1.7911	1.7555	0.8996	-0.1527	yes	down
162	metab_13049	Lipids and lipid-like molecules	Fatty Acyls	Fatty acids and conjugates	Adipate Semialdehyde	0.01983	0.05261	1.7902	1.7785	1.2361	0.3058	yes	up
163	metab_4218	Lipids and lipid-like molecules	Fatty Acyls	Eicosanoids	Mg(0:0/Pge2/0:0)	3.944e-05	0.0008874	1.7885	1.768	1.1312	0.1779	yes	up
164	metab_11378	Benzenoids	Anthracenes	Anthraquinones	Rubiadin	0.0002858	0.002773	1.7854	1.767	1.1212	0.165	yes	up
165	metab_4190	-	-	-	4'-Hydroxy-5-Methoxyflavone	7.637e-08	7.761e-06	1.7665	1.7461	1.0747	0.104	yes	up
166	metab_1381	Lignans, neolignans and related compounds	Lignan glycosides	Not Available	Arctiin	0.0004789	0.003784	1.7641	1.7538	1.1569	0.2103	yes	up
167	metab_11389	Lipids and lipid-like molecules	Glycerophospholipids	Glycerophosphocholines	Lpc(18:1)	0.01288	0.03828	1.7599	1.7518	0.8276	-0.2731	yes	down
168	metab_1604	Lipids and lipid-like molecules	Steroids and steroid derivatives	Hydroxysteroids	Cortisone	0.001867	0.009285	1.7501	1.7344	1.1768	0.2348	yes	up
169	metab_1618	Lipids and lipid-like molecules	Prenol lipids	Diterpenoids	(3S,5R,6R)-3,5-Dihydroxy-6,7-Didehydro-5,6-Dihydro-12'-Apo-Beta-Caroten-12'-Al	0.001949	0.009519	1.7471	1.7469	1.1415	0.1909	yes	up
170	metab_11325	Not Available	Not Available	Not Available	Dg(Pgd1/0:0/I-13:0)	0.002142	0.01017	1.7433	1.6994	0.8872	-0.1727	yes	down
171	metab_9026	Organic acids and derivatives	Carboxylic acids and derivatives	Amino acids, peptides, and analogues	4-Hydroxy Nonenal Glutathione	0.02746	0.06714	1.7414	1.7308	1.3936	0.4788	yes	up
172	metab_11972	-	-	-	Isosulochrin	1.008e-06	6.432e-05	1.7356	1.7299	1.1334	0.1806	yes	up
173	metab_11422	Lipids and lipid-like molecules	Fatty Acyls	Fatty acids and conjugates	9(10)-Epode	7.522e-05	0.001348	1.73	1.7051	0.9198	-0.1205	yes	down
174	metab_11712	-	-	-	Pratol	1.905e-08	2.262e-06	1.7293	1.7091	1.0707	0.0985	yes	up
175	metab_4784	-	-	-	7-[2-Hydroxy-3-(4-Pyridin-2-Ylpiperazin-1-Yl)Propoxy]-4-Methylchromen-2-One	0.04604	0.1003	1.7244	1.7296	1.2035	0.2672	yes	up
176	metab_13993	Organic acids and derivatives	Carboxylic acids and derivatives	Tricarboxylic acids and derivatives	Aconitic Acid	7.643e-05	0.001356	1.714	1.7045	0.9118	-0.1333	yes	down
177	metab_4342	Phenylpropanoids and polyketides	Linear 1,3-diarylpropanoids	Cinnamylphenols	2'-O-Methylisoliquiritigenin	0.002208	0.01029	1.712	1.702	1.1302	0.1766	yes	up
178	metab_4372	-	-	-	2,5-Dimethyl-N-(2-Propan-2-Yl-[1,2,4]Triazolo[1,5-A]Pyridin-8-Yl)Benzamide	0.002139	0.01016	1.7017	1.668	0.8599	-0.2177	yes	down
179	metab_9652	Phenylpropanoids and polyketides	Flavonoids	Flavans	3-O-Acetylpinobanksin	2.408e-08	2.788e-06	1.6982	1.6886	1.1178	0.1606	yes	up
180	metab_4693	Nucleosides, nucleotides, and analogues	Purine nucleosides	Not Available	N-(8-Amino-1-Carboxyoctyl)-Alanyl-Proline	0.03481	0.08086	1.6949	1.6976	1.2106	0.2757	yes	up
181	metab_10046	-	-	-	7,2'-Dihydroxyflavone	1.309e-05	0.0004367	1.6934	1.6614	1.0883	0.1221	yes	up
182	metab_11950	Phenylpropanoids and polyketides	Flavonoids	O-methylated flavonoids	Diosmetin	4.15e-05	0.0009131	1.6878	1.6568	1.0903	0.1247	yes	up
183	metab_1254	Organic oxygen compounds	Organooxygen compounds	Alcohols and polyols	N-(1-Deoxy-1-Fructosyl)Isoleucine	0.0005328	0.004067	1.6829	1.6855	1.1327	0.1797	yes	up
184	metab_1680	Organic nitrogen compounds	Organonitrogen compounds	Guanidines	Imidacloprid	0.006078	0.02158	1.6769	1.7095	0.8462	-0.2409	yes	down
185	metab_11567	Nucleosides, nucleotides, and analogues	Pyrimidine nucleotides	Pyrimidine nucleotide sugars	Deoxythymidine Diphosphate-L-Rhamnose	0.003565	0.01456	1.675	1.6913	0.8656	-0.2083	yes	down
186	metab_14116	Organic acids and derivatives	Carboxylic acids and derivatives	Amino acids, peptides, and analogues	N-Formyl-L-Glutamic Acid	0.002286	0.01053	1.6748	1.7054	1.2361	0.3058	yes	up
187	metab_12046	Organoheterocyclic compounds	Diazanaphthalenes	Benzodiazines	1,2,3,9-Tetrahydropyrrolo[2,1-B]Quinazolin-3-Ol	0.03747	0.08577	1.6719	1.6991	0.8022	-0.318	yes	down
188	metab_12047	Organic acids and derivatives	Keto acids and derivatives	Beta-keto acids and derivatives	Methyl Acetoacetate	7.776e-07	5.269e-05	1.668	1.6496	0.8202	-0.286	yes	down
189	metab_4996	Organic acids and derivatives	Carboxylic acids and derivatives	Amino acids, peptides, and analogues	Fructosyl-Lysine	0.003615	0.01468	1.6667	1.6678	1.2402	0.3105	yes	up
190	metab_14322	Organic acids and derivatives	Carboxylic acids and derivatives	Amino acids, peptides, and analogues	N-Acetyl-L-Aspartic Acid	0.004128	0.01624	1.6611	1.7001	1.2378	0.3078	yes	up
191	metab_13302	Benzenoids	Benzene and substituted derivatives	Benzoic acids and derivatives	Uralenneoside	0.04915	0.1054	1.6592	1.657	0.8229	-0.2813	yes	down
192	metab_4339	Not Available	Not Available	Not Available	Oxonol	0.002148	0.01018	1.6589	1.6331	1.1411	0.1905	yes	up
193	metab_4569	Organic oxygen compounds	Organooxygen compounds	Carbonyl compounds	Adlupulone	0.02716	0.06656	1.6583	1.6306	1.209	0.2738	yes	up
194	metab_1752	Organic oxygen compounds	Organooxygen compounds	Carbohydrates and carbohydrate conjugates	N-Acetyl-7-O-Acetylneuraminic Acid	0.009018	0.02927	1.6566	1.6414	1.2192	0.286	yes	up
195	metab_3556	Lipids and lipid-like molecules	Glycerolipids	Diradylglycerols	Dg(18:4(6Z,9Z,12Z,15Z)/22:5(7Z,10Z,13Z,16Z,19Z)/0:0)	0.00226	0.01044	1.6551	1.6558	1.1118	0.1529	yes	up
196	metab_2094	-	-	-	5,4'-Dimethoxy-7-Hydroxyflavone	1.335e-05	0.0004374	1.6495	1.6198	1.0844	0.1168	yes	up
197	metab_1930	-	-	-	4',6-Dihydroxyflavone	8.497e-05	0.001439	1.6478	1.6255	1.1272	0.1727	yes	up
198	metab_5763	Organic acids and derivatives	Carboxylic acids and derivatives	Amino acids, peptides, and analogues	Citrulline	0.009624	0.03078	1.6454	1.6884	1.1946	0.2565	yes	up
199	metab_7549	Benzenoids	Benzene and substituted derivatives	Nitrobenzenes	5-Hydroxy-3-[[5-(4-Nitrophenyl)Furan-2-Yl]Methylideneamino]-1H-Imidazol-2-One	0.003151	0.0133	1.644	1.6013	1.1731	0.2303	yes	up
200	metab_7026	Organic acids and derivatives	Carboxylic acids and derivatives	Amino acids, peptides, and analogues	Histidine Glutamate	0.0001704	0.002081	1.6411	1.6228	1.1258	0.171	yes	up
201	metab_3253	Lipids and lipid-like molecules	Steroids and steroid derivatives	Bile acids, alcohols and derivatives	3A,7A,12A-Trihydroxy-5B-Cholestan-26-Al	0.004124	0.01624	1.6377	1.608	1.1467	0.1975	yes	up
202	metab_11994	Organoheterocyclic compounds	Naphthofurans	Not Available	Marasmal	2.966e-05	0.0007392	1.6376	1.6276	0.9073	-0.1403	yes	down
203	metab_1017	Nucleosides, nucleotides, and analogues	Purine nucleosides	Purine 2''-deoxyribonucleosides	2-Amino-9-[(2R,4S,5R)-5-(Hydroperoxymethyl)-4-Hydroxyoxolan-2-Yl]-1H-Purin-6-One	0.02665	0.06562	1.6347	1.5502	0.8709	-0.1995	yes	down
204	metab_13840	Organoheterocyclic compounds	Azolidines	Imidazolidines	Dantrolene	0.0149	0.04275	1.6337	1.606	1.137	0.1852	yes	up
205	metab_7096	Organic acids and derivatives	Carboxylic acids and derivatives	Carboxylic acids	3-Iodopropanoic Acid	5.956e-06	0.0002515	1.6276	1.6014	0.9014	-0.1498	yes	down
206	metab_3415	Lipids and lipid-like molecules	Fatty Acyls	Eicosanoids	9-Hepe	0.0008619	0.005581	1.6224	1.592	0.9007	-0.1509	yes	down
207	metab_1927	-	-	-	6,4'-Dihydroxyflavone	7.14e-05	0.001307	1.6179	1.6025	1.086	0.1191	yes	up
208	metab_281	Organic acids and derivatives	Carboxylic acids and derivatives	Amino acids, peptides, and analogues	L-Ornithine	0.02332	0.05957	1.6058	1.6707	1.2243	0.292	yes	up
209	metab_14414	Organic acids and derivatives	Carboxylic acids and derivatives	Amino acids, peptides, and analogues	Cysteineglutathione Disulfide	0.007627	0.02575	1.6054	1.6009	1.1721	0.2291	yes	up
210	metab_7265	Lipids and lipid-like molecules	Fatty Acyls	Fatty acyl glycosides	L-Ascorbic Acid 2-Glucoside	2.885e-05	0.000733	1.6029	1.5993	1.1252	0.1701	yes	up
211	metab_4621	-	-	-	Cardamonin	6.085e-05	0.001177	1.6004	1.5949	1.1359	0.1839	yes	up
212	metab_9137	Lipids and lipid-like molecules	Fatty Acyls	Fatty acids and conjugates	Traumatic Acid	3.324e-05	0.0007957	1.5999	1.594	1.1382	0.1868	yes	up
213	metab_10137	Lipids and lipid-like molecules	Fatty Acyls	Fatty acids and conjugates	2,3-Dinor-Txb1	0.0005354	0.004074	1.5887	1.5533	0.9217	-0.1176	yes	down
214	metab_13886	Alkaloids and derivatives	Harmala alkaloids	Not Available	(1R*,3R*,3'S*)-1,2,3,4-Tetrahydro-1-(2-Thio-3-Pyrrolidinyl)-Beta-Carboline-3-Carboxylic Acid	0.0004164	0.003472	1.587	1.541	0.9002	-0.1516	yes	down
215	metab_8206	Benzenoids	Benzene and substituted derivatives	Benzoic acids and derivatives	6-O-Galloylsucrose	0.007125	0.02445	1.5824	1.6128	1.1451	0.1955	yes	up
216	metab_9245	Phenylpropanoids and polyketides	Tannins	Hydrolyzable tannins	Castacrenin B	0.0006422	0.004585	1.5804	1.5557	0.8985	-0.1544	yes	down
217	metab_9499	Phenylpropanoids and polyketides	Flavonoids	O-methylated flavonoids	Isosakuranetin	0.000179	0.002144	1.5752	1.5771	1.0878	0.1214	yes	up
218	metab_1920	Organoheterocyclic compounds	Benzofurans	Not Available	7-Methyl-2-Benzofurancarboxaldehyde	0.02221	0.05744	1.5723	1.5243	1.1983	0.261	yes	up
219	metab_13051	Phenylpropanoids and polyketides	Flavonoids	Flavonoid glycosides	Tricin 7-Neohesperidoside	0.005235	0.01938	1.5695	1.5458	1.1259	0.1711	yes	up
220	metab_1300	Organoheterocyclic compounds	Imidazopyrimidines	Purines and purine derivatives	Istradefylline	0.04738	0.1025	1.5623	1.5529	1.1751	0.2328	yes	up
221	metab_11500	-	-	-	9-Oxootre	8.463e-05	0.001438	1.5612	1.5298	0.9216	-0.1178	yes	down
222	metab_9433	Phenylpropanoids and polyketides	Isoflavonoids	Not Available	(-)-Medicarpin	0.003341	0.01389	1.5607	1.552	1.108	0.1479	yes	up
223	metab_8873	Phenylpropanoids and polyketides	Flavonoids	Flavonoid glycosides	Neoliquiritin	0.00199	0.009652	1.5596	1.5331	1.0999	0.1374	yes	up
224	metab_9709	-	-	-	5-O-Methylbiochanin A	0.008384	0.02758	1.5596	1.4848	1.1259	0.1711	yes	up
225	metab_3840	Not Available	Not Available	Not Available	Mg(20:5(5Z,8Z,11Z,14Z,16E)-Oh(18)/0:0/0:0)	3.081e-05	0.0007572	1.5546	1.5269	1.0944	0.1301	yes	up
226	metab_11963	Phenylpropanoids and polyketides	Flavonoids	Flavones	7,4'-Dihydroxyflavone	0.0001635	0.002038	1.5528	1.5375	1.0805	0.1118	yes	up
227	metab_935	Nucleosides, nucleotides, and analogues	Purine nucleotides	Purine ribonucleotides	Adenosine Monophosphate	0.0007474	0.005084	1.5519	1.5537	0.8958	-0.1588	yes	down
228	metab_2820	Not Available	Not Available	Not Available	Dg(20:5(7Z,9Z,11E,13E,17Z)-3Oh(5,6,15)/I-16:0/0:0)	0.000245	0.002539	1.5513	1.5496	1.0862	0.1193	yes	up
229	metab_1451	Lipids and lipid-like molecules	Fatty Acyls	Fatty acid esters	6-Hydroxyheptanoylcarnitine	0.000851	0.005544	1.5508	1.5129	1.1113	0.1522	yes	up
230	metab_5598	Organoheterocyclic compounds	Piperidines	Not Available	Pelletierine	0.0006779	0.00476	1.5486	1.525	0.9063	-0.1419	yes	down
231	metab_10492	Phenylpropanoids and polyketides	Flavonoids	O-methylated flavonoids	Isokaempferide	0.0004542	0.003655	1.541	1.5049	1.1211	0.1649	yes	up
232	metab_4492	Lipids and lipid-like molecules	Fatty Acyls	Fatty acid esters	Nonanedioylcarnitine	1.597e-05	0.0004974	1.5406	1.5178	1.0928	0.1281	yes	up
233	metab_5101	Alkaloids and derivatives	Not Available	Not Available	Pilocarpine	0.001262	0.007157	1.5331	1.5253	1.1526	0.2048	yes	up
234	metab_1921	Phenylpropanoids and polyketides	Isoflavonoids	Furanoisoflavonoids	Medicarpin	0.02653	0.0654	1.5296	1.4814	1.1214	0.1653	yes	up
235	metab_5664	Nucleosides, nucleotides, and analogues	Purine nucleotides	Purine ribonucleotides	Adenylo-Succinate	0.0112	0.03442	1.5285	1.5921	1.177	0.2351	yes	up
236	metab_12809	Phenylpropanoids and polyketides	Macrolides and analogues	Not Available	Latrunculin A	0.008619	0.02819	1.5199	1.5126	1.1259	0.1711	yes	up
237	metab_9961	Lipids and lipid-like molecules	Fatty Acyls	Lineolic acids and derivatives	13-Hydroxy-9-Methoxy-10-Oxo-11-Octadecenoic Acid	0.0007117	0.004929	1.5191	1.483	0.9191	-0.1217	yes	down
238	metab_4735	-	-	-	3-Amino-2-(1-Pyrrolidinylcarbonyl)-4(3H)-Quinazolinone	0.03131	0.07458	1.5183	1.5163	1.1784	0.2368	yes	up
239	metab_11632	-	-	-	2,4-Dihydroxy-3,5,6-Trimethylbenzoic Acid	0.001879	0.009306	1.5137	1.4677	0.8817	-0.1816	yes	down
240	metab_4998	Organoheterocyclic compounds	Piperidines	Not Available	4-Hydroxy-2,2,6,6-Tetramethylpiperidine-1-Oxyl	0.000493	0.003859	1.5101	1.4935	1.1138	0.1555	yes	up
241	metab_9322	Organic acids and derivatives	Carboxylic acids and derivatives	Amino acids, peptides, and analogues	4-Ethoxymethylene-2-Phenyl-2-Oxazolin-5-One	1.719e-05	0.000522	1.5044	1.4872	1.0895	0.1237	yes	up
242	metab_11273	-	-	-	Pgk2	4.614e-06	0.0002088	1.5043	1.478	0.9344	-0.0979	yes	down
243	metab_11523	Lipids and lipid-like molecules	Fatty Acyls	Eicosanoids	15-Keto-Prostaglandin E2	2.291e-06	0.0001232	1.5043	1.4763	0.9277	-0.1083	yes	down
244	metab_9870	Lipids and lipid-like molecules	Fatty Acyls	Eicosanoids	11-Dehydro-Thromboxane B2	0.0001296	0.001814	1.501	1.4705	0.9004	-0.1514	yes	down
245	metab_4610	Lipids and lipid-like molecules	Fatty Acyls	Fatty acid esters	Nona-3,5,7-Trienoylcarnitine	0.003069	0.01302	1.5006	1.492	1.1115	0.1526	yes	up
246	metab_9885	-	-	-	13-Hydroxyoctadeca-6,9,11-Trienoic Acid	0.0005011	0.003905	1.5005	1.4817	0.9317	-0.1021	yes	down
247	metab_13564	Organic acids and derivatives	Carboxylic acids and derivatives	Amino acids, peptides, and analogues	2,4-Thiazolidinedicarboxylic Acid, 2-Methyl-	0.0004745	0.003761	1.4924	1.4827	0.8966	-0.1575	yes	down
248	metab_11597	Lipids and lipid-like molecules	Prenol lipids	Sesquiterpenoids	Abscisic Alcohol	0.0003557	0.00315	1.4923	1.4832	0.9067	-0.1413	yes	down
249	metab_3417	Lipids and lipid-like molecules	Glycerophospholipids	Glycerophosphoglycerols	Pg(I-14:0/A-13:0)	0.001775	0.008975	1.4912	1.4968	1.0935	0.129	yes	up
250	metab_11318	Lipids and lipid-like molecules	Fatty Acyls	Lineolic acids and derivatives	9,10-Epoxystearic Acid	4.637e-05	0.00098	1.4893	1.4977	0.9406	-0.0884	yes	down
251	metab_3430	Lipids and lipid-like molecules	Fatty Acyls	Fatty alcohols	Mosinone A	0.0006169	0.004478	1.487	1.4779	1.0894	0.1235	yes	up
252	metab_3557	Lipids and lipid-like molecules	Sphingolipids	Phosphosphingolipids	Sm(D18:1/12:0)	0.0007247	0.004978	1.4774	1.4765	1.0788	0.1094	yes	up
253	metab_9098	-	-	-	Demethyl Medicarpin	3.403e-06	0.0001698	1.4726	1.4515	1.0966	0.133	yes	up
254	metab_4827	Nucleosides, nucleotides, and analogues	Purine nucleotides	Cyclic purine nucleotides	13-Dihydrocarminomycin	0.002699	0.01187	1.469	1.4578	1.1102	0.1508	yes	up
255	metab_7373	Lipids and lipid-like molecules	Fatty Acyls	Fatty acids and conjugates	Itaconic Acid	3.278e-05	0.0007877	1.4673	1.458	0.9288	-0.1065	yes	down
256	metab_12189	Phenylpropanoids and polyketides	Linear 1,3-diarylpropanoids	Chalcones and dihydrochalcones	Phloretin	0.005289	0.0195	1.4654	1.4719	1.095	0.1309	yes	up
257	metab_13543	Lipids and lipid-like molecules	Saccharolipids	Not Available	Licoagroside B	0.01165	0.03547	1.4643	1.5017	0.8862	-0.1743	yes	down
258	metab_11213	Lipids and lipid-like molecules	Steroids and steroid derivatives	Hydroxysteroids	(8S,9S,10S,11S,13S,14S,17R)-11,17-Dihydroxy-17-(2-Hydroxyacetyl)-10,13-Dimethyl-1,4,5,6,7,8,9,11,12,14,15,16-Dodecahydrocyclopenta[A]Phenanthrene-2,3-Dione	4.26e-05	0.0009237	1.4636	1.4365	0.9313	-0.1027	yes	down
259	metab_9993	Lipids and lipid-like molecules	Fatty Acyls	Eicosanoids	Thromboxane A2	0.002659	0.01175	1.4626	1.4301	0.8997	-0.1525	yes	down
260	metab_6890	Organic acids and derivatives	Carboxylic acids and derivatives	Amino acids, peptides, and analogues	Nitrilotriacetic Acid	0.02257	0.05814	1.4601	1.4853	1.1833	0.2428	yes	up
261	metab_4568	Lipids and lipid-like molecules	Steroids and steroid derivatives	Steroid esters	[(8R,9S,13S,14S,17S)-17-Hydroxy-13-Methyl-6,7,8,9,11,12,14,15,16,17-Decahydrocyclopenta[A]Phenanthren-3-Yl] 3-Cyclopentylpropanoate	0.03011	0.07231	1.4585	1.4273	1.1666	0.2223	yes	up
262	metab_13320	Organic acids and derivatives	Carboxylic acids and derivatives	Amino acids, peptides, and analogues	Telotristat	0.0001214	0.001759	1.4566	1.4781	0.9177	-0.124	yes	down
263	metab_4592	Phenylpropanoids and polyketides	Coumarins and derivatives	Coumarin glycosides	4-Methylumbelliferone Glucuronide	0.03851	0.08768	1.455	1.5365	1.1713	0.2281	yes	up
264	metab_4728	-	-	-	7-Methyl-9-[1-(2-Phenylacetyl)Piperidin-4-Yl]Purin-8-One	0.000618	0.004481	1.4548	1.4353	0.9144	-0.1291	yes	down
265	metab_1663	Organic oxygen compounds	Organooxygen compounds	Carbonyl compounds	Embelin	0.002259	0.01044	1.4548	1.4382	0.895	-0.16	yes	down
266	metab_2924	Lipids and lipid-like molecules	Fatty Acyls	Lineolic acids and derivatives	Dg(16:0/18:3(9Z,12Z,15Z)/0:0)	0.0103	0.0323	1.4539	1.4665	1.1126	0.1539	yes	up
267	metab_9369	Lipids and lipid-like molecules	Fatty Acyls	Eicosanoids	Pgf2A Ethanolamide	0.02486	0.06226	1.4538	1.4399	1.1666	0.2223	yes	up
268	metab_4518	-	-	-	2-(4-Methyl-1,4-Diazepan-1-Yl)Quinazolin-4-Amine	0.001524	0.00808	1.4471	1.444	1.0978	0.1346	yes	up
269	metab_10069	Lipids and lipid-like molecules	Fatty Acyls	Fatty acyl glycosides	9-Hydroxy-7-Megastigmen-3-One Glucoside	0.0002215	0.002422	1.4464	1.425	0.9278	-0.1081	yes	down
270	metab_14387	Organic oxygen compounds	Organooxygen compounds	Carbohydrates and carbohydrate conjugates	Lactulose	0.006817	0.02359	1.4445	1.4632	1.1071	0.1468	yes	up
271	metab_9996	Lipids and lipid-like molecules	Fatty Acyls	Fatty acid esters	3-Hydroxytridecanoyl Carnitine	0.005112	0.01897	1.4426	1.4029	0.9071	-0.1407	yes	down
272	metab_1559	Organoheterocyclic compounds	Dioxanes	1,4-dioxanes	Spectinomycin	0.04427	0.09744	1.442	1.4512	1.1207	0.1644	yes	up
273	metab_2452	Lipids and lipid-like molecules	Fatty Acyls	Fatty alcohols	1-Acetoxy-2-Hydroxy-16-Heptadecyn-4-One	0.01833	0.04952	1.4386	1.4692	1.1364	0.1844	yes	up
274	metab_4214	-	-	-	Meprylcaine	2.45e-05	0.0006482	1.4385	1.4261	0.911	-0.1345	yes	down
275	metab_11923	Nucleosides, nucleotides, and analogues	Purine nucleosides	Not Available	Inosine	0.003354	0.01392	1.4314	1.4075	1.1182	0.1611	yes	up
276	metab_8367	Benzenoids	Benzene and substituted derivatives	Biphenyls and derivatives	Sacubitrilat	0.001042	0.006334	1.4308	1.3943	0.9198	-0.1207	yes	down
277	metab_4025	Lipids and lipid-like molecules	Fatty Acyls	Eicosanoids	Thromboxane B2	0.001985	0.009633	1.425	1.4137	1.0958	0.132	yes	up
278	metab_1689	Phenylpropanoids and polyketides	Isoflavonoids	Isoflavonoid O-glycosides	Wistin	0.0054	0.01979	1.4213	1.4146	0.9102	-0.1358	yes	down
279	metab_4802	Organic acids and derivatives	Carboxylic acids and derivatives	Amino acids, peptides, and analogues	N-Octanoyl-L-Homoserine Lactone	0.0001057	0.00162	1.4212	1.406	1.1001	0.1377	yes	up
280	metab_4669	Benzenoids	Benzene and substituted derivatives	Benzenesulfonamides	Amprenavir	0.03623	0.08331	1.4165	1.3784	1.1348	0.1824	yes	up
281	metab_11503	Not Available	Not Available	Not Available	Dg(13:0/20:4(7E,9E,11Z,13E)-3Oh(5S,6R,15S)/0:0)	0.005996	0.02136	1.4136	1.4017	0.9054	-0.1433	yes	down
282	metab_2633	Lipids and lipid-like molecules	Glycerolipids	Diradylglycerols	Dg(22:4(7Z,10Z,13Z,16Z)/18:4(6Z,9Z,12Z,15Z)/0:0)	0.01172	0.03559	1.4117	1.4254	1.0911	0.1257	yes	up
283	metab_5395	Alkaloids and derivatives	Tropane alkaloids	Not Available	Ecgonine	0.002489	0.01117	1.4104	1.3812	0.93	-0.1047	yes	down
284	metab_1684	Lipids and lipid-like molecules	Prenol lipids	Sesquiterpenoids	3,11,12-Trihydroxy-1(10)-Spirovetiven-2-One	0.003923	0.01567	1.4099	1.4023	1.109	0.1493	yes	up
285	metab_937	-	-	-	3-Cyclopropyl-6-Pyrrolidin-1-Yl-[1,2,4]Triazolo[4,3-B]Pyridazine	0.002439	0.01104	1.4092	1.4071	1.0931	0.1284	yes	up
286	metab_10222	Lipids and lipid-like molecules	Sphingolipids	Ceramides	Cer(D18:1/12:0)	3.09e-05	0.0007577	1.4072	1.3968	0.9367	-0.0943	yes	down
287	metab_13298	Organoheterocyclic compounds	Lactams	Beta lactams	Imipenem	0.003014	0.01287	1.4065	1.3828	1.0873	0.1207	yes	up
288	metab_9455	-	-	-	Juniperoside Iii	0.0006892	0.004828	1.406	1.4024	0.9046	-0.1446	yes	down
289	metab_9859	Lipids and lipid-like molecules	Fatty Acyls	Lineolic acids and derivatives	9(S)-Hotre	0.003568	0.01456	1.4057	1.3563	0.904	-0.1455	yes	down
290	metab_1563	Lipids and lipid-like molecules	Fatty Acyls	Fatty acid esters	(4E)-3-Hydroxyhex-4-Enoylcarnitine	0.0137	0.04005	1.402	1.3851	1.1335	0.1807	yes	up
291	metab_10339	-	-	-	Cer[As](D34:1)	7.235e-06	0.0002872	1.4011	1.3916	0.9412	-0.0875	yes	down
292	metab_9185	Benzenoids	Benzene and substituted derivatives	Benzoic acids and derivatives	Phthalamic Acid	0.0009353	0.005928	1.3992	1.407	0.9002	-0.1516	yes	down
293	metab_12058	Benzenoids	Benzene and substituted derivatives	Benzoic acids and derivatives	2-Iodobenzoic Acid	5.243e-05	0.001065	1.39	1.3651	0.9305	-0.1039	yes	down
294	metab_8449	Nucleosides, nucleotides, and analogues	Purine nucleosides	Not Available	7-Methylxanthosine	0.008487	0.02783	1.3878	1.3667	1.1018	0.1399	yes	up
295	metab_5126	Organic acids and derivatives	Carboxylic acids and derivatives	Amino acids, peptides, and analogues	3''-Deamino-3''-Oxonicotianamine	0.004461	0.01712	1.3876	1.3361	0.9122	-0.1325	yes	down
296	metab_2881	Lipids and lipid-like molecules	Fatty Acyls	Fatty acids and conjugates	Dg(9D3/9D3/0:0)	0.0001468	0.001929	1.3746	1.363	1.0577	0.081	yes	up
297	metab_3891	Lipids and lipid-like molecules	Fatty Acyls	Eicosanoids	Prostaglandin J2	0.0002545	0.002597	1.3717	1.349	0.9281	-0.1077	yes	down
298	metab_11267	Lipids and lipid-like molecules	Fatty Acyls	Eicosanoids	Thromboxane B3	0.0005208	0.003998	1.3694	1.3343	0.9294	-0.1056	yes	down
299	metab_3411	Not Available	Not Available	Not Available	Dg(16:0/Pge2/0:0)	0.0005342	0.00407	1.3652	1.3559	1.0584	0.0819	yes	up
300	metab_9795	Phenylpropanoids and polyketides	Flavonoids	Flavones	Pinoquercetin	0.00939	0.03018	1.3601	1.3997	0.9039	-0.1457	yes	down
301	metab_9046	Organoheterocyclic compounds	Diazines	Pyrimidines and pyrimidine derivatives	Methohexital	0.04	0.0903	1.3553	1.3609	0.8933	-0.1628	yes	down
302	metab_10034	Organic oxygen compounds	Organooxygen compounds	Carbonyl compounds	(Z)-3-Methyl-2-(2-Pentenyl)-2-Cyclopenten-1-One	4.018e-05	0.0008946	1.354	1.3364	0.9418	-0.0866	yes	down
303	metab_11495	Lipids and lipid-like molecules	Prenol lipids	Diterpenoids	Ent-17-Oxo-15-Kauren-19-Oic Acid	0.000418	0.003476	1.3532	1.3522	0.9227	-0.116	yes	down
304	metab_9670	-	-	-	3-(4'O-Malonyl)Rha(1-2)Gal(1-2)Glua-Soyasaponenol B	0.0273	0.06681	1.353	1.3453	0.9098	-0.1363	yes	down
305	metab_11667	Alkaloids and derivatives	Cytochalasans	Cytochalasins	Dihydrocytochalasin B	0.002759	0.01206	1.3517	1.3019	0.9374	-0.0932	yes	down
306	metab_1761	Organic acids and derivatives	Carboxylic acids and derivatives	Amino acids, peptides, and analogues	N-Undecanoylglycine	0.01783	0.04852	1.3509	1.3061	1.0965	0.1329	yes	up
307	metab_8831	Organoheterocyclic compounds	Lactones	Gamma butyrolactones	2-Carboxy-5,7-Dimethyl-4-Octanolide	0.02234	0.05768	1.3494	1.3454	1.1183	0.1613	yes	up
308	metab_13137	-	-	-	Dihydrobenzoic Acid Pentose	0.03526	0.0817	1.3456	1.3459	0.8958	-0.1587	yes	down
309	metab_13814	Organoheterocyclic compounds	Thienopyrimidines	Not Available	(S)-5-(4-Hydroxy-4-Methylisoxazolidine-2-Carbonyl)-1-Isopropyl-3-Methyl-6-((3-Methyl-5-(Trifluoromethyl)-1H-Pyrazol-4-Yl)Methyl)Thieno[2,3-D]Pyrimidine-2,4(1H,3H)-Dione	0.01339	0.03937	1.3452	1.3482	1.0902	0.1246	yes	up
310	metab_1824	-	-	-	Cycloheptyl-(4-Hydroxy-1-Oxa-9-Azaspiro[5.5]Undecan-9-Yl)Methanone	0.003057	0.01299	1.3414	1.3216	0.9253	-0.112	yes	down
311	metab_9959	Lipids and lipid-like molecules	Fatty Acyls	Fatty acids and conjugates	Vernolic Acid	0.004796	0.01809	1.34	1.3088	0.9468	-0.0789	yes	down
312	metab_1799	Organoheterocyclic compounds	Diazinanes	Piperazines	2-[4-[4-(4-Carbamimidoylphenyl)Piperazin-1-Yl]Piperidin-1-Yl]Acetic Acid	0.001279	0.007231	1.3363	1.3367	0.9259	-0.1111	yes	down
313	metab_9855	Lipids and lipid-like molecules	Fatty Acyls	Fatty acyl glycosides	5,7-Megastigmadien-9-Ol Glucoside	6.032e-05	0.001169	1.3348	1.3115	0.9414	-0.0871	yes	down
314	metab_1578	Alkaloids and derivatives	Camptothecins	Not Available	Sn-38	0.0001045	0.001609	1.3344	1.3255	1.0792	0.1099	yes	up
315	metab_7462	Nucleosides, nucleotides, and analogues	Purine nucleosides	Not Available	Guanosine	0.006014	0.02139	1.3341	1.2796	0.9442	-0.0829	yes	down
316	metab_11872	Lipids and lipid-like molecules	Prenol lipids	Terpene lactones	Helenalin	0.005844	0.02096	1.3336	1.3251	0.9177	-0.1238	yes	down
317	metab_9343	Organic oxygen compounds	Organooxygen compounds	Alcohols and polyols	(3S)-3-Hydroxycyclocitral	0.0001333	0.00184	1.3322	1.3258	0.9465	-0.0794	yes	down
318	metab_7831	Organoheterocyclic compounds	Imidazopyrimidines	Purines and purine derivatives	Tenofovir Disoproxil	0.0001426	0.001898	1.331	1.3599	0.9276	-0.1083	yes	down
319	metab_8674	Phenylpropanoids and polyketides	Flavonoids	Flavans	Dihydrokaempferol	0.0386	0.08783	1.3272	1.2676	0.8954	-0.1594	yes	down
320	metab_11682	Lipids and lipid-like molecules	Fatty Acyls	Fatty acids and conjugates	9,10-Epoxyoctadecanoic Acid	0.004025	0.01595	1.3272	1.2692	0.9307	-0.1036	yes	down
321	metab_4690	Organic acids and derivatives	Carboxylic acids and derivatives	Amino acids, peptides, and analogues	Arginyltryptophan	0.01571	0.04434	1.3122	1.2908	1.0966	0.1331	yes	up
322	metab_1816	Lipids and lipid-like molecules	Fatty Acyls	Fatty acids and conjugates	Dioscoretine	0.004723	0.01788	1.3122	1.2886	1.0907	0.1252	yes	up
323	metab_7391	Nucleosides, nucleotides, and analogues	Ribonucleoside 3''-phosphates	Not Available	Adenosine 3'-Monophosphate	0.002572	0.01146	1.3098	1.3379	0.9278	-0.1082	yes	down
324	metab_11727	-	-	-	3-(5-Acetyl-2-Furyl)-5-Methoxy-2-Benzofuran-1(3H)-One	3.796e-06	0.0001828	1.3064	1.2861	1.0531	0.0746	yes	up
325	metab_8736	Phenylpropanoids and polyketides	Flavonoids	Flavonoid glycosides	Apigenin 7-O-(2''-O-Acetylglucoside)	0.03243	0.07664	1.3044	1.2986	1.1015	0.1395	yes	up
326	metab_12624	Phenylpropanoids and polyketides	Isoflavonoids	Isoflavonoid O-glycosides	Daidzin	0.02576	0.06405	1.3036	1.2962	1.0943	0.1301	yes	up
327	metab_4374	Organic oxygen compounds	Organooxygen compounds	Carbonyl compounds	2-Hydroxyacetophenone	0.03455	0.08038	1.2989	1.262	1.1036	0.1422	yes	up
328	metab_11307	Organoheterocyclic compounds	Lactones	Gamma butyrolactones	5-Heptyltetrahydro-2-Oxo-3-Furancarboxylic Acid	1.067e-05	0.0003819	1.2927	1.2756	0.9513	-0.072	yes	down
329	metab_9872	Benzenoids	Fluorenes	Not Available	Fluorenylmethyl Chloroformate	0.01306	0.0387	1.2863	1.2379	1.0935	0.129	yes	up
330	metab_4546	Lipids and lipid-like molecules	Prenol lipids	Sesquiterpenoids	Tanacetol A	0.002825	0.01228	1.286	1.2772	0.9209	-0.1189	yes	down
331	metab_8158	Organic oxygen compounds	Organooxygen compounds	Carbohydrates and carbohydrate conjugates	Salicylic Acid Glucoside	0.009433	0.03029	1.284	1.2877	0.9226	-0.1163	yes	down
332	metab_4164	-	-	-	Verrucarol	0.002675	0.01179	1.2813	1.2488	0.9273	-0.1089	yes	down
333	metab_8503	-	-	-	Phenylacetylaspartic Acid	1.243e-05	0.0004197	1.2812	1.2685	1.0622	0.087	yes	up
334	metab_9377	Benzenoids	Anthracenes	Anthraquinones	Purpurin	8.017e-05	0.001393	1.2789	1.2776	1.0699	0.0975	yes	up
335	metab_11399	Lipids and lipid-like molecules	Glycerophospholipids	Glycerophosphoethanolamines	Lpe(18:1)	0.006528	0.02277	1.2746	1.3097	0.923	-0.1157	yes	down
336	metab_4680	Alkaloids and derivatives	Ajmaline-sarpagine alkaloids	Not Available	17-O-Acetylnorajmaline	0.001035	0.006311	1.2718	1.2762	0.9273	-0.1088	yes	down
337	metab_7290	Organic acids and derivatives	Carboxylic acids and derivatives	Tricarboxylic acids and derivatives	Tricarballylic Acid	0.03493	0.081	1.2697	1.2956	1.1434	0.1933	yes	up
338	metab_9101	-	-	-	Maesopsin	0.007887	0.02637	1.2695	1.2759	1.0912	0.1259	yes	up
339	metab_10076	-	-	-	11-Dehydro-Txb3	0.001418	0.00769	1.2681	1.2407	0.9359	-0.0956	yes	down
340	metab_4991	Lipids and lipid-like molecules	Prenol lipids	Monoterpenoids	Carvone	0.009634	0.03081	1.2678	1.2699	1.0951	0.131	yes	up
341	metab_4917	Benzenoids	Tetralins	Not Available	Tamibarotene	0.01543	0.04377	1.2654	1.2965	1.0931	0.1284	yes	up
342	metab_11499	-	-	-	6,7,8-Triphenyl-2,3-Dihydro[1,2,4]Triazolo[4,3-B]Pyridazin-3-One	0.0004688	0.003728	1.2633	1.2611	0.9333	-0.0996	yes	down
343	metab_3726	Lipids and lipid-like molecules	Glycerophospholipids	Glycerophosphocholines	Lysopc(20:5(5Z,8Z,11Z,14Z,17Z)/0:0)	0.02784	0.06786	1.2622	1.2615	0.9168	-0.1253	yes	down
344	metab_10042	-	-	-	Oroxylin A	0.0006878	0.00482	1.2613	1.2468	1.0487	0.0686	yes	up
345	metab_4872	Benzenoids	Benzene and substituted derivatives	Benzoic acids and derivatives	4-Hydroxybenzoic Acid	0.01588	0.04467	1.2584	1.2644	0.8892	-0.1694	yes	down
346	metab_13752	Organic acids and derivatives	Carboxylic acids and derivatives	Amino acids, peptides, and analogues	N(2)-Phenylacetyl-L-Glutaminate	0.01297	0.03847	1.2581	1.2248	1.0855	0.1184	yes	up
347	metab_9345	Organoheterocyclic compounds	Tetrapyrroles and derivatives	Porphyrins	Inosine 2',3'-Cyclic Phosphate	0.01309	0.03874	1.2555	1.2836	0.9044	-0.145	yes	down
348	metab_11147	Lipids and lipid-like molecules	Sphingolipids	Glycosphingolipids	As 1-1	1.313e-05	0.0004367	1.2555	1.2394	0.9555	-0.0657	yes	down
349	metab_11455	Organoheterocyclic compounds	Azoles	Pyrazoles	2-[(4-Hydroxycyclohexyl)Amino]-4-(3,6,6-Trimethyl-4-Oxo-5,7-Dihydroindazol-1-Yl)Benzamide	0.00193	0.009455	1.2553	1.2403	0.9285	-0.107	yes	down
350	metab_5003	-	-	-	Swainsonine	0.01487	0.04268	1.2551	1.2459	0.9226	-0.1162	yes	down
351	metab_4344	Lipids and lipid-like molecules	Fatty Acyls	Eicosanoids	Prostaglandin F1A	0.02561	0.06377	1.255	1.2424	1.0905	0.1249	yes	up
352	metab_11843	Organoheterocyclic compounds	Benzothiazoles	Not Available	2-Mercaptobenzothiazole	2.67e-05	0.0006961	1.2533	1.239	0.9401	-0.0892	yes	down
353	metab_12573	Organoheterocyclic compounds	Lactams	Beta lactams	Ceftizoxime Alapivoxil	0.004781	0.01805	1.2498	1.2866	0.9226	-0.1162	yes	down
354	metab_2133	-	-	-	Kaempferol 3,7,4'-Trimethyl Ether	0.02735	0.0669	1.2484	1.23	0.9095	-0.1369	yes	down
355	metab_1833	Organoheterocyclic compounds	Pteridines and derivatives	Alloxazines and isoalloxazines	Lumichrome	8.484e-06	0.0003223	1.2413	1.2376	1.0626	0.0876	yes	up
356	metab_8837	Benzenoids	Benzene and substituted derivatives	Phenylpyruvic acid derivatives	Phenylpyruvic Acid	0.008381	0.02758	1.2391	1.2063	0.9247	-0.113	yes	down
357	metab_11997	Lipids and lipid-like molecules	Fatty Acyls	Fatty acids and conjugates	3-Carboxy-4-Methyl-5-Pentyl-2-Furanpropanoic Acid	0.0001345	0.001845	1.2389	1.2327	0.9396	-0.0899	yes	down
358	metab_11131	-	-	-	Iaa-94	0.01907	0.05117	1.2384	1.2681	0.8815	-0.1819	yes	down
359	metab_5129	-	-	-	N-(4-Fluoro-3-Methylphenyl)-2,4-Dimethyl-1,3-Thiazole-5-Carboxamide	9.896e-05	0.001568	1.2383	1.2403	0.9378	-0.0927	yes	down
360	metab_3668	Lipids and lipid-like molecules	Glycerophospholipids	Glycerophosphoserines	Ps(15:0/16:1(9Z))	0.03662	0.08404	1.2383	1.2596	1.0993	0.1366	yes	up
361	metab_5488	Organic acids and derivatives	Carboxylic acids and derivatives	Amino acids, peptides, and analogues	Dl-Asparagine	0.002651	0.01173	1.2382	1.2077	1.0539	0.0757	yes	up
362	metab_9469	-	-	-	Histamine-Trifluoromethyltoluide	0.00155	0.008179	1.2224	1.2008	0.9354	-0.0964	yes	down
363	metab_9522	Phenylpropanoids and polyketides	Flavonoids	Flavones	Isorhamnetin	0.01267	0.03778	1.2175	1.1942	1.0718	0.1	yes	up
364	metab_2017	Alkaloids and derivatives	Benzophenanthridine alkaloids	Quaternary benzophenanthridine alkaloids	Sanguinarine	0.03267	0.07704	1.2169	1.2338	1.1135	0.1551	yes	up
365	metab_9612	Phenylpropanoids and polyketides	Linear 1,3-diarylpropanoids	Chalcones and dihydrochalcones	Isoliquiritigenin	0.01315	0.03888	1.2158	1.2369	1.0874	0.1209	yes	up
366	metab_1504	Lipids and lipid-like molecules	Prenol lipids	Terpene glycosides	Isopetasoside	0.0269	0.06608	1.2152	1.2053	1.0957	0.1318	yes	up
367	metab_14016	-	-	-	Dl-M-Tyrosine	0.0001937	0.002236	1.2139	1.1897	0.9423	-0.0857	yes	down
368	metab_3829	Lipids and lipid-like molecules	Steroids and steroid derivatives	Androstane steroids	Oxymesterone	0.003561	0.01455	1.2088	1.1979	0.9327	-0.1005	yes	down
369	metab_1404	Benzenoids	Benzene and substituted derivatives	Benzoic acids and derivatives	3-Methylsalicylic Acid	0.001243	0.007086	1.2069	1.1801	0.9351	-0.0967	yes	down
370	metab_2943	Lipids and lipid-like molecules	Fatty Acyls	Lineolic acids and derivatives	Dg(15:0/18:4(6Z,9Z,12Z,15Z)/0:0)	0.001749	0.008893	1.2062	1.2082	1.0505	0.0711	yes	up
371	metab_9254	Lipids and lipid-like molecules	Fatty Acyls	Fatty acids and conjugates	Undecylenic Acid	0.008986	0.02921	1.2052	1.1983	1.0736	0.1025	yes	up
372	metab_9688	Organic oxygen compounds	Organooxygen compounds	Carbohydrates and carbohydrate conjugates	B-D-Xylopyranosyl-(1->4)-A-L-Rhamnopyranosyl-(1->2)-L-Arabinose	0.004176	0.01636	1.204	1.1747	0.9371	-0.0937	yes	down
373	metab_7251	Organic acids and derivatives	Organic phosphoric acids and derivatives	Phosphate esters	Diethyl Hydrogen Phosphate	0.01848	0.04986	1.204	1.2109	0.9097	-0.1365	yes	down
374	metab_8617	Lipids and lipid-like molecules	Fatty Acyls	Fatty acyl glycosides	Pantoyllactone Glucoside	0.0008835	0.005672	1.2027	1.2448	1.0687	0.0958	yes	up
375	metab_13544	Organic oxygen compounds	Organooxygen compounds	Carbohydrates and carbohydrate conjugates	Apiosylglucosyl 4-Hydroxybenzoate	0.01295	0.03845	1.2021	1.2306	0.9343	-0.0981	yes	down
376	metab_10081	Lipids and lipid-like molecules	Fatty Acyls	Eicosanoids	Prostaglandin D2	0.02002	0.05301	1.202	1.1616	0.9281	-0.1077	yes	down
377	metab_14528	Organic oxygen compounds	Organooxygen compounds	Carbohydrates and carbohydrate conjugates	Alpha-D-Glucose	0.006157	0.02177	1.2016	1.1954	1.0549	0.0771	yes	up
378	metab_11770	Lipids and lipid-like molecules	Prenol lipids	Terpene glycosides	Monoglucuronylglycyrrhetinic Acid	0.01464	0.04214	1.2015	1.1806	1.077	0.1071	yes	up
379	metab_13548	-	-	-	Benzoic Acid+1O,1Meo,O-Hex	0.03068	0.07343	1.1971	1.2168	1.0741	0.1032	yes	up
380	metab_9578	Lipids and lipid-like molecules	Fatty Acyls	Fatty acyl glycosides	Blumenol C Glucoside	0.0003502	0.003118	1.1966	1.1927	0.9473	-0.0781	yes	down
381	metab_9782	-	-	-	16-Hydroxy-9-Oxooctadeca-10,12,14-Trienoic Acid	0.000292	0.002805	1.192	1.1813	0.9552	-0.0662	yes	down
382	metab_9876	Organic oxygen compounds	Organic oxides	Not Available	Polygodial	8.097e-05	0.001401	1.1889	1.1826	0.9346	-0.0976	yes	down
383	metab_11861	Benzenoids	Phenols	Benzenediols	Resorcinol	0.001651	0.008536	1.1816	1.1936	1.0804	0.1116	yes	up
384	metab_3942	-	-	-	Derrustone	0.007694	0.0259	1.1787	1.1967	0.937	-0.0938	yes	down
385	metab_5764	Organic acids and derivatives	Carboxylic acids and derivatives	Amino acids, peptides, and analogues	L-Alpha-Amino-5-Oxo-2(5H)-Isoxazolepropanoic Acid	0.005042	0.01877	1.1767	1.1808	1.0668	0.0933	yes	up
386	metab_11293	-	-	-	Gamma-13(S)-Hpotre	0.0004899	0.003843	1.1753	1.1659	0.9616	-0.0565	yes	down
387	metab_11099	Lipids and lipid-like molecules	Glycerophospholipids	Glycerophosphoethanolamines	Pe(P-18:1(11Z)/22:4(7Z,10Z,13Z,16Z))	0.001407	0.007654	1.1738	1.1739	0.945	-0.0817	yes	down
388	metab_11110	Lipids and lipid-like molecules	Sphingolipids	Glycosphingolipids	As 1-2	0.0001863	0.00219	1.1728	1.1517	0.9542	-0.0677	yes	down
389	metab_13089	Organic acids and derivatives	Keto acids and derivatives	Short-chain keto acids and derivatives	Alpha-Ketoisovaleric Acid	0.004418	0.017	1.1689	1.1667	1.0661	0.0924	yes	up
390	metab_9293	Benzenoids	Benzene and substituted derivatives	Benzoic acids and derivatives	Salicylic Acid	4.941e-05	0.001029	1.1645	1.1451	0.9503	-0.0736	yes	down
391	metab_5826	Organoheterocyclic compounds	Pyrrolidines	Pyrrolidones	2-Pyrrolidinone	4.24e-06	0.0001986	1.1622	1.1482	1.0477	0.0672	yes	up
392	metab_6658	Organoheterocyclic compounds	Pteridines and derivatives	Pterins and derivatives	7,8-Dihydroneopterin 3'-Phosphate	0.004255	0.01651	1.1608	1.1623	0.9374	-0.0932	yes	down
393	metab_1486	Alkaloids and derivatives	Lupin alkaloids	Lupinine-type alkaloids	Lupinic Acid	0.0192	0.05143	1.1574	1.1183	0.9269	-0.1095	yes	down
394	metab_5648	Organic acids and derivatives	Carboximidic acids and derivatives	Carboximidic acids	Acrylamide	0.03553	0.08216	1.1543	1.1234	1.1653	0.2207	yes	up
395	metab_9016	Lipids and lipid-like molecules	Fatty Acyls	Fatty acyl glycosides	Prenyl Glucoside	0.009807	0.03118	1.1533	1.1471	1.0866	0.1198	yes	up
396	metab_11027	Lipids and lipid-like molecules	Fatty Acyls	Fatty aldehydes	Docosanal	0.02975	0.0716	1.1493	1.1515	1.0857	0.1187	yes	up
397	metab_9837	-	-	-	13-Hpotre	0.0002332	0.002486	1.1488	1.1374	0.9633	-0.054	yes	down
398	metab_706	Organosulfur compounds	Sulfoxides	Not Available	Dimethyl Sulfoxide	0.0333	0.07823	1.1485	1.1855	0.904	-0.1456	yes	down
399	metab_9197	Lipids and lipid-like molecules	Fatty Acyls	Fatty alcohols	6-Methyl-2-Methylene-6-Octene-1,3,8-Triol	0.0005445	0.00412	1.1468	1.1279	1.0594	0.0832	yes	up
400	metab_1565	-	-	-	Hemado	0.04328	0.09572	1.1441	1.1176	1.0815	0.1131	yes	up
401	metab_1065	Lipids and lipid-like molecules	Fatty Acyls	Fatty acyl glycosides	Sarmentosin	0.007363	0.02514	1.1428	1.1136	1.0609	0.0853	yes	up
402	metab_10237	Lipids and lipid-like molecules	Glycerophospholipids	Glycerophosphoethanolamines	Pe(22:4(7Z,10Z,13Z,16Z)/18:0)	0.0001259	0.001784	1.1414	1.1305	0.9633	-0.054	yes	down
403	metab_1456	Alkaloids and derivatives	Not Available	Not Available	Lycopsamine	0.001907	0.009374	1.1327	1.1173	1.0606	0.0848	yes	up
404	metab_5080	Organoheterocyclic compounds	Indoles and derivatives	Pyridoindoles	L-1,2,3,4-Tetrahydro-Beta-Carboline-3-Carboxylic Acid	0.03489	0.08095	1.1321	1.1398	0.9176	-0.1241	yes	down
405	metab_10238	Not Available	Not Available	Not Available	Ps(22:6(5Z,8E,10Z,13Z,15E,19Z)-2Oh(7S, 17S)/18:0)	0.003433	0.01416	1.1308	1.142	0.9453	-0.0811	yes	down
406	metab_9619	Organic oxygen compounds	Organooxygen compounds	Alcohols and polyols	N-Methylsphingosine	0.02762	0.06743	1.1299	1.0746	0.9375	-0.0931	yes	down
407	metab_2876	Not Available	Not Available	Not Available	Pa(20:3(6,8,11)-Oh(5)/P-16:0)	0.007291	0.02497	1.1295	1.1287	1.0521	0.0733	yes	up
408	metab_1066	Organoheterocyclic compounds	Piperidines	Phenylpiperidines	Reduced Haloperidol	0.02336	0.05963	1.1285	1.1258	0.9326	-0.1006	yes	down
409	metab_4657	Organoheterocyclic compounds	Piperidines	Piperidinones	Cycloheximide	0.002113	0.01006	1.1231	1.1131	1.057	0.0799	yes	up
410	metab_2028	Phenylpropanoids and polyketides	Isoflavonoids	Isoflavans	Dalbergioidin	0.01546	0.04384	1.1227	1.1099	1.0644	0.0901	yes	up
411	metab_13863	Nucleosides, nucleotides, and analogues	Purine nucleosides	Purine 2''-deoxyribonucleosides	Deoxyguanosine	0.0001505	0.001951	1.119	1.1124	0.9623	-0.0555	yes	down
412	metab_11101	Lipids and lipid-like molecules	Sphingolipids	Glycosphingolipids	Galactosylceramide (D18:1/14:0)	0.0001649	0.00204	1.1112	1.0987	0.9662	-0.0496	yes	down
413	metab_807	Benzenoids	Phenols	Benzenetriols and derivatives	Pyrogallol	7.687e-06	0.0002958	1.1108	1.1044	1.0528	0.0742	yes	up
414	metab_12828	Lipids and lipid-like molecules	Fatty Acyls	Fatty acids and conjugates	3-(1-Hydroxymethyl-1-Propenyl)Pentanedioic Acid	3.58e-05	0.0008352	1.1107	1.0943	1.0554	0.0778	yes	up
415	metab_12332	Phenylpropanoids and polyketides	Stilbenes	Stilbene glycosides	Rose Oxide (Cis)	0.006939	0.02391	1.1101	1.0924	1.0571	0.0802	yes	up
416	metab_11255	Organic oxygen compounds	Organooxygen compounds	Carbonyl compounds	1,1,1-Trifluoroheptadecan-2-One	0.0008725	0.005625	1.109	1.0923	0.946	-0.0801	yes	down
417	metab_10449	Not Available	Not Available	Not Available	Pa(18:1(12Z)-2Oh(9,10)/18:3(6Z,9Z,12Z))	0.0003986	0.003385	1.1087	1.0873	1.0439	0.062	yes	up
418	metab_1105	Organic oxygen compounds	Organooxygen compounds	Carbohydrates and carbohydrate conjugates	N-Acetylmuramate	0.006359	0.02232	1.1074	1.0765	1.0483	0.0681	yes	up
419	metab_2111	-	-	-	Tetradecyldiethanolamine	0.001813	0.009116	1.1062	1.0862	0.9501	-0.0739	yes	down
420	metab_10232	Organic oxygen compounds	Organooxygen compounds	Ethers	Heptaethylene Glycol Monododecyl Ether	3.308e-06	0.000166	1.1041	1.0954	0.9625	-0.0552	yes	down
421	metab_880	Organoheterocyclic compounds	Imidazopyrimidines	Purines and purine derivatives	7-Methylguanine	1.231e-05	0.0004185	1.1037	1.0866	1.0463	0.0653	yes	up
422	metab_7082	Organic acids and derivatives	Peptidomimetics	Hybrid peptides	Bis-Gamma-Glutamylcysteinylbis-Beta-Alanine	0.0009839	0.006101	1.1033	1.0948	1.0501	0.0705	yes	up
423	metab_11034	Lipids and lipid-like molecules	Sphingolipids	Ceramides	Cer(D18:1/14:0)	3.489e-06	0.0001715	1.0955	1.0912	0.9696	-0.0446	yes	down
424	metab_5221	-	-	-	N-([1,2,4]Triazolo[4,3-A]Pyridin-8-Yl)Pyridine-2-Carboxamide	0.007678	0.02586	1.0948	1.0659	1.0569	0.0798	yes	up
425	metab_5821	Organic acids and derivatives	Carboxylic acids and derivatives	Amino acids, peptides, and analogues	L-Asparagine	0.01135	0.03474	1.0944	1.0524	1.0457	0.0644	yes	up
426	metab_12119	Lipids and lipid-like molecules	Fatty Acyls	Fatty acids and conjugates	Undecanedioic Acid	0.0001541	0.001978	1.0932	1.0892	1.0472	0.0665	yes	up
427	metab_5403	Benzenoids	Benzene and substituted derivatives	Benzoic acids and derivatives	4-Aminobenzoate	0.000706	0.004902	1.0921	1.077	1.0514	0.0723	yes	up
428	metab_5289	Organoheterocyclic compounds	Pyrazolopyrimidines	Not Available	Pyrazolopyrimidinone	0.003523	0.01443	1.0919	1.0526	0.9438	-0.0835	yes	down
429	metab_1843	Lipids and lipid-like molecules	Prenol lipids	Diterpenoids	Musabalbisiane A	0.01364	0.03995	1.0911	1.1082	1.0766	0.1065	yes	up
430	metab_2494	Lipids and lipid-like molecules	Fatty Acyls	Eicosanoids	Lipoxin A4	0.001469	0.007873	1.0884	1.0659	1.051	0.0718	yes	up
431	metab_9478	Lipids and lipid-like molecules	Prenol lipids	Sesquiterpenoids	Eremopetasidione	0.02348	0.05986	1.0869	1.0795	0.9447	-0.0821	yes	down
432	metab_14105	Organic acids and derivatives	Carboxylic acids and derivatives	Amino acids, peptides, and analogues	Gamma-Glutamylthreonine	0.02174	0.05652	1.086	1.2255	1.103	0.1414	yes	up
433	metab_4392	Lipids and lipid-like molecules	Prenol lipids	Terpene lactones	Alantolactone	0.002168	0.01025	1.085	1.0688	0.947	-0.0785	yes	down
434	metab_2189	-	-	-	Bakkenolide A	0.001765	0.008942	1.0849	1.0821	0.9487	-0.076	yes	down
435	metab_11302	Phenylpropanoids and polyketides	Flavonoids	Flavones	Norizalpinin	0.01341	0.03942	1.0813	1.0697	1.0551	0.0774	yes	up
436	metab_4848	Lipids and lipid-like molecules	Fatty Acyls	Fatty amides	5-((6-((Aminomethyl)Amino)-1-Oxohexyl)Amino)Pentanoic Acid	0.03243	0.07664	1.0798	1.0376	1.0822	0.114	yes	up
437	metab_8190	Lipids and lipid-like molecules	Prenol lipids	Terpene glycosides	Paeoniflorin	0.00136	0.007458	1.0798	1.1031	0.9522	-0.0707	yes	down
438	metab_7024	Organic acids and derivatives	Carboxylic acids and derivatives	Amino acids, peptides, and analogues	Gamma-Glutamylglutamic Acid	0.001487	0.007945	1.0798	1.0471	0.952	-0.0709	yes	down
439	metab_9272	Lipids and lipid-like molecules	Prenol lipids	Sesquiterpenoids	Abscisic Acid	0.002043	0.009838	1.0793	1.0674	0.9456	-0.0807	yes	down
440	metab_459	Organoheterocyclic compounds	Lactams	Beta lactams	4-Oxo-2-Azetidinecarboxylic Acid	0.01634	0.04563	1.0778	1.0357	1.0594	0.0833	yes	up
441	metab_6073	Organic nitrogen compounds	Organonitrogen compounds	Nitrogen mustard compounds	Cyclophosphamide	0.001647	0.008526	1.0777	1.0581	0.9578	-0.0622	yes	down
442	metab_5765	Organic acids and derivatives	Carboxylic acids and derivatives	Amino acids, peptides, and analogues	Oxiracetam	0.03756	0.08592	1.0762	1.1222	1.0883	0.1221	yes	up
443	metab_2454	Lipids and lipid-like molecules	Fatty Acyls	Eicosanoids	Ciprostene	0.03388	0.07921	1.0757	1.1239	0.9271	-0.1092	yes	down
444	metab_4029	Benzenoids	Indanes	Not Available	Hematein	0.006465	0.0226	1.0742	1.0604	1.0524	0.0736	yes	up
445	metab_1737	Lipids and lipid-like molecules	Fatty Acyls	Fatty acid esters	3-Hydroxynona-5,7-Dienoylcarnitine	0.002983	0.01278	1.0738	1.0741	1.0487	0.0686	yes	up
446	metab_8209	Not Available	Not Available	Not Available	Dg(5-Iso Pgf2Vi/2:0/0:0)	0.01765	0.04822	1.0732	1.0611	1.0606	0.0849	yes	up
447	metab_6078	Organoheterocyclic compounds	Diazines	Pyrimidines and pyrimidine derivatives	2-(6-Hydroxy-4-Oxo-2-Sulfanylidene-1H-Pyrimidin-5-Yl)Propanedial	0.001545	0.008155	1.0724	1.0514	0.9582	-0.0617	yes	down
448	metab_5675	Organic acids and derivatives	Carboxylic acids and derivatives	Amino acids, peptides, and analogues	(+)-Threo-2-Amino-3,4-Dihydroxybutanoic Acid	0.002853	0.01236	1.0715	1.0443	1.0442	0.0624	yes	up
449	metab_5833	Organoheterocyclic compounds	Imidazopyrimidines	Purines and purine derivatives	Beta-D-3-Ribofuranosyluric Acid	0.001944	0.009498	1.0714	1.0609	0.9497	-0.0744	yes	down
450	metab_8752	Organoheterocyclic compounds	Benzopyrans	1-benzopyrans	3-Methoxy-2-(4-Methylbenzoyl)-4H-1-Benzopyran-4-One	0.01001	0.03165	1.0709	1.0689	0.9459	-0.0803	yes	down
451	metab_435	Organic oxygen compounds	Organooxygen compounds	Carbohydrates and carbohydrate conjugates	Isatoribine	0.009031	0.02929	1.0666	1.0398	0.9442	-0.0828	yes	down
452	metab_13161	Phenylpropanoids and polyketides	Cinnamic acids and derivatives	Hydroxycinnamic acids and derivatives	Trans-Caffeic Acid [Apiosyl-(1->6)-Glucosyl] Ester	0.03596	0.08284	1.0664	1.0951	1.0716	0.0997	yes	up
453	metab_14653	Organic acids and derivatives	Carboxylic acids and derivatives	Amino acids, peptides, and analogues	3-Cyano-L-Alanine	0.004658	0.01772	1.0662	1.0218	1.0471	0.0664	yes	up
454	metab_1054	Organoheterocyclic compounds	Diazanaphthalenes	Benzodiazines	Remdesivir	0.00473	0.0179	1.0647	1.0707	1.0449	0.0633	yes	up
455	metab_7813	Organic oxygen compounds	Organooxygen compounds	Carbonyl compounds	3-Dehydroshikimate	0.04703	0.1019	1.0636	1.0925	1.0927	0.1278	yes	up
456	metab_3899	Organoheterocyclic compounds	Naphthofurans	Not Available	Cafestol	0.002904	0.01255	1.0609	1.0644	0.9467	-0.0791	yes	down
457	metab_12177	Organic acids and derivatives	Carboxylic acids and derivatives	Dicarboxylic acids and derivatives	Oxalic Acid	0.02979	0.07167	1.0562	1.0719	0.861	-0.2158	yes	down
458	metab_9683	Lipids and lipid-like molecules	Prenol lipids	Monoterpenoids	Geranic Acid	0.0007214	0.004969	1.0556	1.0276	0.9628	-0.0547	yes	down
459	metab_5127	Nucleosides, nucleotides, and analogues	Pyrimidine nucleosides	Pyrimidine 2''-deoxyribonucleosides	Thymidine	4.513e-05	0.0009665	1.0551	1.0497	0.9557	-0.0653	yes	down
460	metab_2776	Lipids and lipid-like molecules	Prenol lipids	Diterpenoids	Annoglabasin C	0.000877	0.005645	1.0536	1.0393	1.0412	0.0582	yes	up
461	metab_2009	-	-	-	Cuneatin Methyl Ether	0.002576	0.01147	1.0529	1.0545	0.9554	-0.0659	yes	down
462	metab_5740	Organoheterocyclic compounds	Oxepanes	Not Available	Levoglucosan	0.001938	0.009488	1.0527	1.0371	1.0507	0.0714	yes	up
463	metab_10347	Lipids and lipid-like molecules	Fatty Acyls	Fatty acids and conjugates	Cerebronic Acid	0.04115	0.09218	1.0527	1.0568	1.0747	0.1039	yes	up
464	metab_13696	Organic acids and derivatives	Carboxylic acids and derivatives	Amino acids, peptides, and analogues	7-Aminocephalosporanic Acid	0.03358	0.07872	1.0482	1.0613	0.9555	-0.0656	yes	down
465	metab_7478	-	-	-	Ala Tyr	0.002052	0.009859	1.0474	1.0386	0.9502	-0.0737	yes	down
466	metab_6729	Organic acids and derivatives	Organic carbonic acids and derivatives	Ureas	3-Ureidopropionic Acid	0.005777	0.02076	1.0462	1.002	1.0381	0.0539	yes	up
467	metab_1161	Organic acids and derivatives	Carboxylic acids and derivatives	Amino acids, peptides, and analogues	Homomethionine	6.93e-05	0.001277	1.0442	1.0429	0.9529	-0.0696	yes	down
468	metab_553	Organic oxygen compounds	Organooxygen compounds	Carbonyl compounds	Furfural	6.664e-05	0.001247	1.0429	1.0377	1.0455	0.0642	yes	up
469	metab_662	Organic acids and derivatives	Carboxylic acids and derivatives	Amino acids, peptides, and analogues	Glycine, L-G-Glutamyl-L-Cysteinyl-, 3-Methyl Ester	0.001803	0.009077	1.042	1.0459	1.0499	0.0703	yes	up
470	metab_4851	Lipids and lipid-like molecules	Steroids and steroid derivatives	Estrane steroids	Trilostane	0.03651	0.08382	1.0414	1.0839	1.0677	0.0945	yes	up
471	metab_1898	Organic oxygen compounds	Organooxygen compounds	Carbonyl compounds	(Z)-3-Oxo-2-(2-Pentenyl)-1-Cyclopenteneacetic Acid	0.0023	0.01059	1.0412	1.0435	1.0626	0.0875	yes	up
472	metab_6860	Lipids and lipid-like molecules	Glycerophospholipids	Glycerophosphoinositols	Glycerophosphoinositol	0.0243	0.06139	1.0411	1.0398	0.9536	-0.0686	yes	down
473	metab_11198	Lipids and lipid-like molecules	Steroids and steroid derivatives	Vitamin D and derivatives	1-A,24R,25-Trihydroxyvitamin D2	0.005636	0.02038	1.0405	1.0549	0.9529	-0.0697	yes	down
474	metab_9165	Benzenoids	Phenols	Nitrophenols	4-Nitrophenol	0.0001377	0.001865	1.0401	1.06	1.0526	0.074	yes	up
475	metab_8019	Organic acids and derivatives	Carboxylic acids and derivatives	Amino acids, peptides, and analogues	Dopaxanthin	0.04289	0.09502	1.0396	1.0282	1.0705	0.0983	yes	up
476	metab_11505	Organic oxygen compounds	Organooxygen compounds	Carbohydrates and carbohydrate conjugates	Ntp	0.03301	0.07764	1.0373	1.0413	0.9329	-0.1003	yes	down
477	metab_1213	-	-	-	Rx 821002 Hydrochloride	0.03426	0.07987	1.0366	1.0457	0.944	-0.0831	yes	down
478	metab_2010	Phenylpropanoids and polyketides	Flavonoids	O-methylated flavonoids	Eupatorin	0.001067	0.00645	1.0349	1.051	0.9465	-0.0793	yes	down
479	metab_4354	Lipids and lipid-like molecules	Prenol lipids	Sesquiterpenoids	Dihydrophaseic Acid	0.004988	0.01863	1.0349	1.0324	0.9445	-0.0824	yes	down
480	metab_2788	Lipids and lipid-like molecules	Prenol lipids	Triterpenoids	Ginsenoside C-K	0.04349	0.0961	1.0348	1.0226	1.0623	0.0872	yes	up
481	metab_9895	-	-	-	Grandifloric Acid	0.008256	0.02725	1.0344	1.0309	0.9527	-0.07	yes	down
482	metab_8057	Organic acids and derivatives	Carboxylic acids and derivatives	Amino acids, peptides, and analogues	Methionine Glutamate	0.001275	0.007214	1.034	1.035	0.9591	-0.0602	yes	down
483	metab_2684	Lipids and lipid-like molecules	Prenol lipids	Diterpenoids	Aphidicolin	0.0002605	0.002621	1.0323	1.02	1.04	0.0566	yes	up
484	metab_13324	Organoheterocyclic compounds	Diazines	Pyrimidines and pyrimidine derivatives	Afn911	0.01442	0.04164	1.0303	1.0318	0.9431	-0.0845	yes	down
485	metab_8009	-	-	-	Phenolphthalin	0.02028	0.05351	1.0297	1.0507	0.947	-0.0786	yes	down
486	metab_4288	Phenylpropanoids and polyketides	Isoflavonoids	O-methylated isoflavonoids	Prunetin	0.01508	0.04307	1.0284	1.035	1.047	0.0662	yes	up
487	metab_11915	-	-	-	20-Carboxy-Ltb4	0.0003771	0.003296	1.027	1.014	0.9632	-0.0541	yes	down
488	metab_9676	Lipids and lipid-like molecules	Steroids and steroid derivatives	Sulfated steroids	16Beta-Oh-Dhea Sulfate	0.01037	0.03249	1.0263	0.9917	0.9536	-0.0685	yes	down
489	metab_12842	Organic oxygen compounds	Organooxygen compounds	Carbohydrates and carbohydrate conjugates	P-Cresol Glucuronide	0.0002994	0.002848	1.0253	1.0204	1.05	0.0704	yes	up
490	metab_4396	Organoheterocyclic compounds	Isobenzofurans	Not Available	Ligustilide	0.007598	0.02569	1.023	1.0203	1.0672	0.0938	yes	up
491	metab_1751	-	-	-	4-Oxo-4-(3-Oxodecan-2-Ylamino)Butanoic Acid	0.02191	0.05683	1.0222	1.011	0.9365	-0.0946	yes	down
492	metab_11073	Lipids and lipid-like molecules	Sphingolipids	Glycosphingolipids	Soyacerebroside I	1.963e-05	0.0005669	1.022	0.9989	0.9709	-0.0426	yes	down
493	metab_891	Nucleosides, nucleotides, and analogues	Pyrimidine nucleosides	Pyrimidine 2''-deoxyribonucleosides	5-Methyldeoxycytidine	0.001006	0.006199	1.0192	1.0241	0.9524	-0.0703	yes	down
494	metab_654	Nucleosides, nucleotides, and analogues	Purine nucleosides	Not Available	N6-Methyladenosine	0.001042	0.006334	1.0167	0.9992	1.0468	0.066	yes	up
495	metab_6728	Lipids and lipid-like molecules	Fatty Acyls	Fatty acids and conjugates	Maleamic Acid	0.007018	0.02413	1.0136	0.9706	1.0448	0.0632	yes	up
496	metab_2069	Lipids and lipid-like molecules	Prenol lipids	Terpene lactones	Costunolide	0.003029	0.0129	1.0101	0.9934	0.9549	-0.0666	yes	down
497	metab_7512	Organic acids and derivatives	Carboxylic acids and derivatives	Amino acids, peptides, and analogues	Glutamyltyrosine	0.007557	0.02559	1.009	0.974	0.9563	-0.0644	yes	down
498	metab_3442	Not Available	Not Available	Not Available	Dg(I-16:0/20:4(6E,8Z,11Z,13E)-2Oh(5S,15S)/0:0)	0.003357	0.01392	1.0084	1.0204	1.0351	0.0498	yes	up
499	metab_8575	Organic oxygen compounds	Organooxygen compounds	Carbohydrates and carbohydrate conjugates	Salviaflaside Methyl Ester	0.005063	0.01883	1.0063	1.0025	0.9638	-0.0532	yes	down
500	metab_1696	Lipids and lipid-like molecules	Fatty Acyls	Fatty acid esters	6-Hydroxynon-7-Enoylcarnitine	0.004661	0.01773	1.0049	1.0026	1.0397	0.0562	yes	up
501	metab_5068	-	-	-	2-Amino-4-Cresol	0.03183	0.07552	1.0041	1.0123	0.9365	-0.0947	yes	down
502	metab_9376	-	-	-	2-(6-Hydroxyhexyl)-3-Methylidenebutanedioic Acid	0.03608	0.08304	1.0021	0.9823	1.0669	0.0935	yes	up
503	metab_14008	Organic acids and derivatives	Carboxylic acids and derivatives	Amino acids, peptides, and analogues	O-Succinyl-L-Homoserine	2.129e-06	0.0001166	1.002	0.9873	0.9625	-0.0552	yes	down
504	metab_5174	-	-	-	Leu Ala Glu	0.0002531	0.002588	1.0005	0.9937	1.0445	0.0629	yes	up

## Sheet: Table S4E
Table S4E The DAMs in ACC100 vs NP group
NO.	Metab ID	HMDB Superclass	HMDB Class	HMDB Subclass	Metabolite	P_value	FDR	VIP_pred_OPLS-DA	VIP_PLS-DA	FC(ACC100/NP)	Log2FC(ACC100/NP)	Significant	Regulate
1	metab_14648	Organic acids and derivatives	Carboxylic acids and derivatives	Amino acids, peptides, and analogues	Cystathionine	4.818e-06	0.0001224	4.3614	4.3436	8.9311	3.1588	yes	up
2	metab_8935	Organic acids and derivatives	Hydroxy acids and derivatives	Medium-chain hydroxy acids and derivatives	10-Hydroxydecanoic Acid	2.548e-09	3.151e-07	4.2733	4.254	17.9798	4.1683	yes	up
3	metab_7386	Organic acids and derivatives	Carboxylic acids and derivatives	Amino acids, peptides, and analogues	(1R,4R,5S,6R)-4-Amino-2-Oxabicyclo[3.1.0]Hexane-4,6-Dicarboxylic Acid	9.513e-16	3.803e-12	3.8813	3.8687	2.0748	1.0529	yes	up
4	metab_4521	-	-	-	4-Amino-2-[Butyl(Methyl)Amino]-N-Phenylpyrimidine-5-Carboxamide	1.895e-11	6.313e-09	3.6463	3.6388	2.0528	1.0376	yes	up
5	metab_5356	Benzenoids	Phenol ethers	Anisoles	Edotecarin	3.39e-05	0.0004928	3.6166	3.5817	2.0926	1.0653	yes	up
6	metab_7359	Organic acids and derivatives	Carboxylic acids and derivatives	Amino acids, peptides, and analogues	Oxidized Glutathione	0.003702	0.01293	3.5093	3.4926	2.2097	1.1439	yes	up
7	metab_5648	Organic acids and derivatives	Carboximidic acids and derivatives	Carboximidic acids	Acrylamide	1.3e-09	1.812e-07	3.3388	3.3367	2.1126	1.0791	yes	up
8	metab_14073	Organic oxygen compounds	Organooxygen compounds	Carbohydrates and carbohydrate conjugates	Trehalose	0.0001298	0.001251	3.2659	3.2431	1.8863	0.9156	yes	up
9	metab_5390	Organoheterocyclic compounds	Azoles	Pyrazoles	Antipyrine	1.334e-08	1.203e-06	3.2629	3.2383	2.3957	1.2604	yes	up
10	metab_10539	Organoheterocyclic compounds	Diazinanes	Piperazines	Atevirdine	0.0004056	0.00268	3.2155	3.2109	2.2943	1.198	yes	up
11	metab_13918	Organic acids and derivatives	Carboxylic acids and derivatives	Amino acids, peptides, and analogues	Tetrahydrodipicolinate	2.478e-15	5.803e-12	3.1581	3.1494	1.8908	0.919	yes	up
12	metab_12480	Lipids and lipid-like molecules	Steroids and steroid derivatives	Steroid esters	Beta-Estradiol 17-Propionate	8.843e-09	8.552e-07	3.087	3.0792	1.8009	0.8488	yes	up
13	metab_5585	Organic acids and derivatives	Carboxylic acids and derivatives	Amino acids, peptides, and analogues	Aspartyl-Proline	3.135e-10	5.611e-08	3.0664	3.0527	1.6339	0.7083	yes	up
14	metab_11432	-	-	-	7-Hydroxy-3'-Methoxyflavone	6.438e-08	4e-06	3.0388	3.0313	1.4987	0.5837	yes	up
15	metab_5437	-	-	-	Ala Asn Glu	1.435e-11	5.062e-09	3.0372	3.0234	1.5496	0.6319	yes	up
16	metab_4570	-	-	-	Chrysin-7-O-Glucuronide	3.694e-05	0.0005215	3.0237	3.0309	1.8126	0.8581	yes	up
17	metab_5441	Organic acids and derivatives	Carboxylic acids and derivatives	Amino acids, peptides, and analogues	(2S,3'S)-Alpha-Amino-2-Carboxy-5-Oxo-1-Pyrrolidinebutanoic Acid	2.241e-09	2.953e-07	3.0131	2.9992	1.5073	0.5919	yes	up
18	metab_9026	Organic acids and derivatives	Carboxylic acids and derivatives	Amino acids, peptides, and analogues	4-Hydroxy Nonenal Glutathione	6.129e-06	0.0001458	3.0071	3.0036	2.0087	1.0063	yes	up
19	metab_7923	Organoheterocyclic compounds	Indoles and derivatives	Indolecarboxylic acids and derivatives	Leucodopachrome	3.218e-12	1.608e-09	3.0066	3.0034	1.9053	0.93	yes	up
20	metab_9217	Organoheterocyclic compounds	Pyridines and derivatives	Hydropyridines	Diethyl 2,3,4-Trimethyl-2,3-Dihydropyridine-5,6-Dicarboxylate	1.041e-07	5.938e-06	2.9929	2.9792	1.75	0.8074	yes	up
21	metab_7919	Organoheterocyclic compounds	Pyridines and derivatives	Hydropyridines	5-(2'-Carboxyethyl)-4,6-Dihydroxypicolinate	4.31e-10	7.383e-08	2.9631	2.9658	1.816	0.8608	yes	up
22	metab_8813	-	-	-	7,3'-Dihydroxyflavone	4.128e-07	1.701e-05	2.9103	2.913	1.8329	0.8741	yes	up
23	metab_4478	Lipids and lipid-like molecules	Steroids and steroid derivatives	Steroidal glycosides	Estriol 3-Sulfate 16-Glucuronide	9.777e-06	0.0001994	2.8553	2.8343	1.6798	0.7482	yes	up
24	metab_5358	Phenylpropanoids and polyketides	Flavonoids	Flavans	Epigallocatechin	8.616e-05	0.0009384	2.8248	2.8079	1.465	0.5509	yes	up
25	metab_3755	-	-	-	6-Hydroxy-4'-Methoxyflavone	9.958e-10	1.531e-07	2.7912	2.7728	1.5125	0.5969	yes	up
26	metab_1854	Phenylpropanoids and polyketides	Coumarins and derivatives	Furanocoumarins	Apiumoside	0.0001244	0.001215	2.7894	2.7941	1.7223	0.7844	yes	up
27	metab_6884	Organic acids and derivatives	Hydroxy acids and derivatives	Beta hydroxy acids and derivatives	3-Hydroxypyruvic Acid	1.717e-07	8.65e-06	2.7773	2.7709	1.7397	0.7988	yes	up
28	metab_2622	-	-	-	Formononetin 7-O-Glucoside-6''-O-Malonate	5.927e-06	0.0001433	2.7761	2.7612	1.4152	0.501	yes	up
29	metab_13951	Organic acids and derivatives	Carboxylic acids and derivatives	Amino acids, peptides, and analogues	Gamma-Glutamylmethionine	6.765e-07	2.527e-05	2.7619	2.7597	0.6198	-0.6901	yes	down
30	metab_7289	Organoheterocyclic compounds	Naphthopyrans	Naphthopyranones	Cassiaside	1.599e-05	0.0002879	2.7564	2.7438	1.4639	0.5498	yes	up
31	metab_7049	Organic acids and derivatives	Carboxylic acids and derivatives	Amino acids, peptides, and analogues	2-Amino-3,7-Dideoxy-D-Threo-Hept-6-Ulosonate	3.91e-09	4.424e-07	2.756	2.7594	1.6266	0.7019	yes	up
32	metab_14322	Organic acids and derivatives	Carboxylic acids and derivatives	Amino acids, peptides, and analogues	N-Acetyl-L-Aspartic Acid	1.622e-08	1.314e-06	2.7182	2.7195	1.5828	0.6625	yes	up
33	metab_4996	Organic acids and derivatives	Carboxylic acids and derivatives	Amino acids, peptides, and analogues	Fructosyl-Lysine	1.307e-08	1.187e-06	2.7179	2.6982	1.6081	0.6853	yes	up
34	metab_13089	Organic acids and derivatives	Keto acids and derivatives	Short-chain keto acids and derivatives	Alpha-Ketoisovaleric Acid	1.652e-07	8.42e-06	2.708	2.7304	1.3507	0.4337	yes	up
35	metab_5101	Alkaloids and derivatives	Not Available	Not Available	Pilocarpine	3.245e-07	1.423e-05	2.6917	2.6875	1.4952	0.5804	yes	up
36	metab_931	Organic acids and derivatives	Carboxylic acids and derivatives	Amino acids, peptides, and analogues	1-(Malonylamino)Cyclopropanecarboxylic Acid	2.985e-10	5.476e-08	2.6673	2.6638	1.2924	0.37	yes	up
37	metab_5167	Lipids and lipid-like molecules	Prenol lipids	Terpene lactones	Reynosin	1.184e-09	1.71e-07	2.6598	2.6579	1.494	0.5792	yes	up
38	metab_8982	Organic acids and derivatives	Carboxylic acids and derivatives	Amino acids, peptides, and analogues	4-Hydroxynonenal Glutathione	0.003839	0.01326	2.6547	2.6505	1.7604	0.8159	yes	up
39	metab_7052	Organic acids and derivatives	Carboxylic acids and derivatives	Amino acids, peptides, and analogues	(2R,4S)-Pyrrolidine-2,4-Dicarboxylic Acid	1.729e-09	2.33e-07	2.6493	2.6456	1.5578	0.6395	yes	up
40	metab_4526	Organic oxygen compounds	Organooxygen compounds	Carbohydrates and carbohydrate conjugates	Dide-O-Methyl-4-O-Alpha-D-Glucopyranosylsimmondsin	6.763e-09	7.053e-07	2.6442	2.6285	1.4843	0.5698	yes	up
41	metab_14105	Organic acids and derivatives	Carboxylic acids and derivatives	Amino acids, peptides, and analogues	Gamma-Glutamylthreonine	1.012e-08	9.371e-07	2.6438	2.6304	1.4673	0.5532	yes	up
42	metab_10037	Phenylpropanoids and polyketides	Flavonoids	Flavones	3,7,4'-Trihydroxyflavone	1.556e-07	8.008e-06	2.6053	2.6013	1.4078	0.4934	yes	up
43	metab_1018	Nucleosides, nucleotides, and analogues	5''-deoxyribonucleosides	Not Available	(S)-5'-Deoxy-5'-(Methylsulfinyl)Adenosine	4.514e-06	0.0001162	2.6028	2.5919	1.3161	0.3962	yes	up
44	metab_14414	Organic acids and derivatives	Carboxylic acids and derivatives	Amino acids, peptides, and analogues	Cysteineglutathione Disulfide	6.159e-06	0.0001463	2.5906	2.5741	1.4358	0.5218	yes	up
45	metab_5766	Organic acids and derivatives	Carboxylic acids and derivatives	Amino acids, peptides, and analogues	4-Amino-3-Hydroxybutyric Acid	1.225e-10	2.772e-08	2.5742	2.5719	1.2984	0.3767	yes	up
46	metab_6890	Organic acids and derivatives	Carboxylic acids and derivatives	Amino acids, peptides, and analogues	Nitrilotriacetic Acid	7.989e-06	0.0001739	2.5623	2.5538	1.4644	0.5503	yes	up
47	metab_7331	Organic acids and derivatives	Carboxylic acids and derivatives	Amino acids, peptides, and analogues	3,5-Dihydroxyphenylglycine	1.416e-12	8.935e-10	2.5547	2.544	1.4284	0.5144	yes	up
48	metab_14368	Organic oxygen compounds	Organooxygen compounds	Carbohydrates and carbohydrate conjugates	Sucrose	1.576e-05	0.0002859	2.5543	2.539	1.4088	0.4944	yes	up
49	metab_14080	Lipids and lipid-like molecules	Steroids and steroid derivatives	Hydroxysteroids	Galactinol	9.341e-05	0.0009931	2.5536	2.5457	1.4572	0.5432	yes	up
50	metab_14116	Organic acids and derivatives	Carboxylic acids and derivatives	Amino acids, peptides, and analogues	N-Formyl-L-Glutamic Acid	9.175e-11	2.245e-08	2.5254	2.5239	1.5074	0.5921	yes	up
51	metab_12725	Lipids and lipid-like molecules	Fatty Acyls	Eicosanoids	Dhv-Pge2	2.143e-05	0.0003566	2.525	2.5218	1.5405	0.6234	yes	up
52	metab_1752	Organic oxygen compounds	Organooxygen compounds	Carbohydrates and carbohydrate conjugates	N-Acetyl-7-O-Acetylneuraminic Acid	7.428e-09	7.548e-07	2.5199	2.5131	1.4623	0.5483	yes	up
53	metab_930	Organic acids and derivatives	Carboxylic acids and derivatives	Amino acids, peptides, and analogues	2-Aminomuconic Acid Semialdehyde	2.692e-11	8.278e-09	2.5135	2.508	1.2683	0.3429	yes	up
54	metab_13989	Organoheterocyclic compounds	Dithiolanes	Lipoamides	Lipoamide	2.362e-09	3.072e-07	2.5039	2.5009	1.3166	0.3968	yes	up
55	metab_14102	Organoheterocyclic compounds	Imidazopyrimidines	Purines and purine derivatives	Dyphylline	5.454e-05	0.0006785	2.4892	2.4618	1.3763	0.4608	yes	up
56	metab_910	Phenylpropanoids and polyketides	Isoflavonoids	Hydroxyisoflavonoids	Glycycoumarin	8.504e-12	3.187e-09	2.4643	2.4559	1.3726	0.4569	yes	up
57	metab_3533	-	-	-	7-O-Methylchrysin	2.38e-10	4.46e-08	2.442	2.4309	1.3319	0.4135	yes	up
58	metab_5407	Phenylpropanoids and polyketides	Flavonoids	Flavonoid glycosides	Aromadendrin 3-Rhamnoside	3.006e-05	0.0004517	2.4411	2.4286	1.3516	0.4347	yes	up
59	metab_11830	Lipids and lipid-like molecules	Prenol lipids	Terpene glycosides	Canavalioside	5.052e-09	5.458e-07	2.4248	2.4204	1.3673	0.4514	yes	up
60	metab_10061	Benzenoids	Anthracenes	Anthraquinones	Hydroxyanthraquinone	3.675e-07	1.557e-05	2.4215	2.4133	1.324	0.4049	yes	up
61	metab_13983	Organic acids and derivatives	Carboxylic acids and derivatives	Amino acids, peptides, and analogues	6-Oxopiperidine-2-Carboxylic Acid	1.911e-10	3.885e-08	2.4178	2.415	1.2233	0.2907	yes	up
62	metab_12544	Organic acids and derivatives	Keto acids and derivatives	Medium-chain keto acids and derivatives	2-Keto-6-Acetamidocaproate	4.636e-08	3.038e-06	2.4079	2.4088	1.4525	0.5385	yes	up
63	metab_5439	-	-	-	Phenazine-1,6-Dicarboxylic Acid	2.697e-08	1.948e-06	2.3688	2.354	1.3599	0.4435	yes	up
64	metab_14342	Organoheterocyclic compounds	Imidazodiazepines	Not Available	Pentostatin	6.454e-07	2.457e-05	2.3518	2.3319	1.2998	0.3783	yes	up
65	metab_1896	Organoheterocyclic compounds	Lactams	Beta lactams	Cefminox	5.971e-06	0.0001438	2.3498	2.348	1.3756	0.4601	yes	up
66	metab_1395	Organic acids and derivatives	Carboxylic acids and derivatives	Amino acids, peptides, and analogues	L-Pyridosine	0.000429	0.002772	2.3463	2.3291	1.3864	0.4714	yes	up
67	metab_12240	-	-	-	Apigenin 7-Galacturonide	0.003087	0.01137	2.3393	2.3486	1.3945	0.4797	yes	up
68	metab_7290	Organic acids and derivatives	Carboxylic acids and derivatives	Tricarboxylic acids and derivatives	Tricarballylic Acid	1.464e-05	0.0002692	2.3279	2.3272	1.3755	0.4599	yes	up
69	metab_4930	-	-	-	N-Octanoyl-Dl-Homoserine Lactone	7.641e-06	0.0001681	2.3155	2.3117	1.3883	0.4733	yes	up
70	metab_4323	Phenylpropanoids and polyketides	Flavonoids	Flavonoid glycosides	Malonylglycitin	3.876e-06	0.0001035	2.3066	2.3012	1.3538	0.437	yes	up
71	metab_8115	Phenylpropanoids and polyketides	Cinnamic acids and derivatives	Hydroxycinnamic acids and derivatives	4-Demethylsimmondsin 2'-(E)-Ferulate	0.005747	0.01794	2.2938	2.3186	1.447	0.5331	yes	up
72	metab_1817	Organic acids and derivatives	Carboxylic acids and derivatives	Amino acids, peptides, and analogues	Asp F I	4.834e-06	0.0001224	2.2835	2.2872	1.3659	0.4499	yes	up
73	metab_14066	Organic acids and derivatives	Carboxylic acids and derivatives	Amino acids, peptides, and analogues	(2S,3R,4S,5R)-3,4,5-Trihydroxy-6-Oxopiperidine-2-Carboxylic Acid	1.067e-09	1.62e-07	2.2767	2.2687	1.4137	0.4994	yes	up
74	metab_1791	-	-	-	Isoflavone Base+1O,1Meo,O-Hex+C7H12No	2.86e-07	1.28e-05	2.2529	2.2426	1.3182	0.3986	yes	up
75	metab_13144	Organic acids and derivatives	Carboxylic acids and derivatives	Carboxylic acid derivatives	2-Hydroxyethyl Methacrylate	0.002677	0.01027	2.2518	2.2263	1.4873	0.5727	yes	up
76	metab_10009	Not Available	Not Available	Not Available	Dg(20:4(6E,8Z,11Z,13E)-2Oh(5S,15S)/13:0/0:0)	4.003e-06	0.0001058	2.2488	2.2391	0.7741	-0.3694	yes	down
77	metab_7455	Organoheterocyclic compounds	Triazines	1,2,4-triazines	Ferene Triazine	1.74e-06	5.52e-05	2.2429	2.2343	1.1924	0.2538	yes	up
78	metab_4255	-	-	-	Lys His Lys	3.118e-08	2.226e-06	2.2246	2.2104	0.7871	-0.3454	yes	down
79	metab_803	Organic acids and derivatives	Carboxylic acids and derivatives	Amino acids, peptides, and analogues	Gamma-Glutamyl-Beta-(Isoxazolin-5-On-2-Yl)Alanine	0.00192	0.008012	2.2118	2.1779	0.7199	-0.4741	yes	down
80	metab_12773	Lipids and lipid-like molecules	Fatty Acyls	Fatty acids and conjugates	3-Isopropylmalic Acid	1.406e-07	7.397e-06	2.1887	2.2026	1.2243	0.292	yes	up
81	metab_11294	-	-	-	7-Hydroxy-2'-Methoxyflavone	3.502e-06	9.661e-05	2.1839	2.1945	1.2943	0.3722	yes	up
82	metab_7337	Organoheterocyclic compounds	Pyrroles	Substituted pyrroles	1-Methylpyrrole-2,5-Diol	1.56e-06	5.112e-05	2.1722	2.175	1.2886	0.3658	yes	up
83	metab_5032	Organic acids and derivatives	Carboxylic acids and derivatives	Amino acids, peptides, and analogues	Valylisoleucine	0.0001034	0.001067	2.1677	2.1878	1.3039	0.3829	yes	up
84	metab_3445	-	-	-	15-Methylprostaglandin E1	7.367e-06	0.0001642	2.1597	2.1362	1.2225	0.2898	yes	up
85	metab_1916	Lipids and lipid-like molecules	Prenol lipids	Sesquiterpenoids	Aflatoxin P1	8.983e-05	0.0009663	2.1483	2.1255	1.3545	0.4378	yes	up
86	metab_4401	Phenylpropanoids and polyketides	Macrolactams	Not Available	Herbimycin A	3.618e-07	1.544e-05	2.1373	2.1452	1.2821	0.3586	yes	up
87	metab_5030	Lipids and lipid-like molecules	Glycerolipids	Monoradylglycerols	1-O-Pentylglycerol	0.0003727	0.002542	2.1371	2.1206	1.3988	0.4842	yes	up
88	metab_5435	Organic oxygen compounds	Organooxygen compounds	Carbohydrates and carbohydrate conjugates	6-(Methylsulfonyl)Hexyl Glucosinolate	2.307e-06	7.02e-05	2.1367	2.1274	1.251	0.3231	yes	up
89	metab_5605	Phenylpropanoids and polyketides	Isoflavonoids	Isoflavans	5,7,8-Trihydroxyflavanone 7-Glucoside	6.337e-07	2.447e-05	2.1327	2.1263	1.2211	0.2882	yes	up
90	metab_4363	-	-	-	Gdc-0879	0.000348	0.002424	2.1255	2.1249	0.7298	-0.4545	yes	down
91	metab_5394	-	-	-	Pyridoxine+O-Hex	3.741e-05	0.000524	2.1227	2.1094	1.2718	0.3469	yes	up
92	metab_4896	Phenylpropanoids and polyketides	Flavonoids	Flavonoid glycosides	Persiconin	2.388e-05	0.0003854	2.1198	2.1329	1.325	0.406	yes	up
93	metab_1393	Lipids and lipid-like molecules	Fatty Acyls	Fatty acids and conjugates	5,8,11-Eicosatrienoic Acid	3.563e-05	0.0005093	2.101	2.1063	1.3543	0.4376	yes	up
94	metab_1838	Lipids and lipid-like molecules	Prenol lipids	Diterpenoids	Gibberellin A120	0.0007683	0.00419	2.0927	2.0734	1.3858	0.4707	yes	up
95	metab_12047	Organic acids and derivatives	Keto acids and derivatives	Beta-keto acids and derivatives	Methyl Acetoacetate	2.492e-05	0.0003958	2.0924	2.1214	1.3854	0.4703	yes	up
96	metab_1863	-	-	-	Formononetin-7-O-Glucoside	2.236e-07	1.072e-05	2.0791	2.0744	1.2049	0.2689	yes	up
97	metab_5313	-	-	-	Dihydro Tanshinone	3.218e-06	9.059e-05	2.0765	2.0838	0.7794	-0.3595	yes	down
98	metab_5664	Nucleosides, nucleotides, and analogues	Purine nucleotides	Purine ribonucleotides	Adenylo-Succinate	0.0003796	0.002578	2.0699	2.0584	1.3016	0.3803	yes	up
99	metab_4420	Homogeneous non-metal compounds	Homogeneous halogens	Not Available	N-[(3A,5B,7A)-3-Hydroxy-24-Oxo-7-(Sulfooxy)Cholan-24-Yl]-Glycine	0.0004249	0.002757	2.0688	2.0734	1.2828	0.3593	yes	up
100	metab_14394	Organic oxygen compounds	Organooxygen compounds	Carbohydrates and carbohydrate conjugates	N-(1-Deoxy-1-Fructosyl)Glycine	2.603e-05	0.0004075	2.0675	2.0637	1.217	0.2834	yes	up
101	metab_789	-	-	-	T-4-Aminocrotonic Acid	1.625e-09	2.215e-07	2.0669	2.065	1.174	0.2314	yes	up
102	metab_12315	-	-	-	Naringenin-7-O-Beta-D-Glucuronide	0.004622	0.01527	2.0451	2.0625	1.4716	0.5574	yes	up
103	metab_7389	Organic acids and derivatives	Carboxylic acids and derivatives	Amino acids, peptides, and analogues	Leucyl-Threonine	0.0006155	0.003613	2.0399	1.984	0.7645	-0.3874	yes	down
104	metab_4537	-	-	-	Glu Cys Ala	0.001287	0.006081	2.0393	2.0438	1.3541	0.4374	yes	up
105	metab_834	Phenylpropanoids and polyketides	Flavonoids	Flavonoid glycosides	(2R,3R)-3,3',4',7-Tetrahydroxyflavanone 7-O-Alpha-L-Rhamnopyranoside	4.56e-07	1.835e-05	2.0326	2.0266	1.1923	0.2537	yes	up
106	metab_11521	Not Available	Not Available	Not Available	Dg(I-13:0/0:0/5-Iso Pgf2Vi)	0.0004608	0.002905	2.0322	2.0433	0.7646	-0.3873	yes	down
107	metab_1576	Benzenoids	Benzene and substituted derivatives	Benzoic acids and derivatives	2,6-Dihydroxybenzoic Acid	0.0006517	0.003752	2.0227	2.0196	1.3535	0.4367	yes	up
108	metab_7666	Organic acids and derivatives	Carboxylic acids and derivatives	Amino acids, peptides, and analogues	Glutamylisoleucine	5.276e-06	0.0001306	2.0216	2.0312	0.846	-0.2412	yes	down
109	metab_4377	Phenylpropanoids and polyketides	Coumarins and derivatives	Not Available	Capillarisin	7.938e-05	0.0008851	2.0166	2.0026	1.3104	0.39	yes	up
110	metab_1744	Organic acids and derivatives	Carboxylic acids and derivatives	Amino acids, peptides, and analogues	2-Amino-5-((1-((Carboxymethyl)Amino)-3-(Methylthio)-1-Oxopropan-2-Yl)Amino)-5-Oxopentanoic Acid	0.00266	0.01023	2.0158	2.0241	1.3502	0.4331	yes	up
111	metab_5236	Organic acids and derivatives	Carboxylic acids and derivatives	Amino acids, peptides, and analogues	4,5-Seco-Dopa	0.0001563	0.001431	2.0128	1.981	1.2863	0.3632	yes	up
112	metab_10018	Not Available	Not Available	Not Available	Dg(A-13:0/0:0/Pge2)	9.607e-05	0.001011	2.0115	1.9739	0.8266	-0.2747	yes	down
113	metab_4383	-	-	-	6,2'-Dihydroxyflavanone	1.379e-06	4.7e-05	2.001	1.984	1.2209	0.2879	yes	up
114	metab_1895	-	-	-	6'-Malonyl Ononin	4.179e-08	2.8e-06	2.0007	1.9925	1.1477	0.1988	yes	up
115	metab_7512	Organic acids and derivatives	Carboxylic acids and derivatives	Amino acids, peptides, and analogues	Glutamyltyrosine	4.056e-06	0.0001068	1.9953	2.0065	0.822	-0.2827	yes	down
116	metab_1166	Benzenoids	Benzene and substituted derivatives	Anilides	Carotamine	0.00234	0.009273	1.9952	1.9937	1.2718	0.3468	yes	up
117	metab_5647	Organic acids and derivatives	Carboxylic acids and derivatives	Amino acids, peptides, and analogues	Beta-Alanine	9.865e-08	5.743e-06	1.9876	1.9804	1.1657	0.2212	yes	up
118	metab_1115	Nucleosides, nucleotides, and analogues	Purine nucleotides	Purine ribonucleotides	Biotinyl-5'-Amp	0.006632	0.01997	1.9746	1.9751	1.2669	0.3413	yes	up
119	metab_1845	Phenylpropanoids and polyketides	Flavonoids	Flavonoid glycosides	Poncirin	0.001191	0.005736	1.9732	1.9735	1.3002	0.3787	yes	up
120	metab_5763	Organic acids and derivatives	Carboxylic acids and derivatives	Amino acids, peptides, and analogues	Citrulline	1.935e-05	0.0003338	1.9668	1.9416	1.2578	0.3309	yes	up
121	metab_4077	Phenylpropanoids and polyketides	Isoflavonoids	Isoflav-2-enes	Glycitein	1.01e-07	5.821e-06	1.9635	1.9495	1.1708	0.2275	yes	up
122	metab_1323	-	-	-	Phe Glu	2.783e-05	0.0004263	1.9614	1.9574	0.8264	-0.2751	yes	down
123	metab_2736	Phenylpropanoids and polyketides	Isoflavonoids	O-methylated isoflavonoids	Formononetin	2.115e-08	1.616e-06	1.9605	1.9468	1.1156	0.1578	yes	up
124	metab_1381	Lignans, neolignans and related compounds	Lignan glycosides	Not Available	Arctiin	2.858e-06	8.319e-05	1.9602	1.9644	1.2181	0.2846	yes	up
125	metab_11596	Alkaloids and derivatives	Ergoline and derivatives	Lysergic acids and derivatives	Ergocornine	0.0005771	0.00345	1.9564	1.9432	0.8227	-0.2815	yes	down
126	metab_4964	Lipids and lipid-like molecules	Fatty Acyls	Fatty acid esters	3-Hydroxyhexanoylcarnitine	0.0002667	0.002037	1.9485	1.9394	1.3214	0.4021	yes	up
127	metab_7268	Nucleosides, nucleotides, and analogues	5''-deoxyribonucleosides	5''-deoxy-5''-thionucleosides	2-[(2-Fluorophenyl)Sulfanylmethyl]-5-[6-[(2-Hydroxycyclopentyl)Amino]Purin-9-Yl]Oxolane-3,4-Diol	3.213e-06	9.059e-05	1.946	1.944	1.1893	0.2501	yes	up
128	metab_11707	-	-	-	(2E)-2-[Hydroxy(Phenyl)Methylidene]-6-Methoxy-1-Benzofuran-3-One	2.728e-09	3.271e-07	1.9457	1.9354	1.1464	0.1971	yes	up
129	metab_5482	Organic acids and derivatives	Carboxylic acids and derivatives	Amino acids, peptides, and analogues	N-Acetyl-S-(N-Methylcarbamoyl)Cysteine	5.284e-06	0.0001306	1.9432	1.9382	1.2024	0.2659	yes	up
130	metab_7251	Organic acids and derivatives	Organic phosphoric acids and derivatives	Phosphate esters	Diethyl Hydrogen Phosphate	0.0001927	0.001638	1.9424	1.929	0.7802	-0.3581	yes	down
131	metab_13049	Lipids and lipid-like molecules	Fatty Acyls	Fatty acids and conjugates	Adipate Semialdehyde	0.008207	0.02344	1.9416	1.9158	1.3104	0.39	yes	up
132	metab_8190	Lipids and lipid-like molecules	Prenol lipids	Terpene glycosides	Paeoniflorin	1.38e-05	0.0002589	1.9379	1.9316	0.8349	-0.2604	yes	down
133	metab_1060	-	-	-	Glu Tyr	0.0001422	0.001347	1.9235	1.9394	0.8104	-0.3034	yes	down
134	metab_4969	-	-	-	Pyr-Phe-Oh	2.107e-06	6.513e-05	1.9218	1.9372	0.8243	-0.2788	yes	down
135	metab_9121	Phenylpropanoids and polyketides	Flavonoids	Flavones	Kaempferol	7.314e-05	0.0008349	1.9202	1.9145	1.2484	0.3201	yes	up
136	metab_1848	Phenylpropanoids and polyketides	Flavonoids	O-methylated flavonoids	Tamarixetin	0.002184	0.008841	1.9196	1.8995	1.3478	0.4306	yes	up
137	metab_9746	-	-	-	(2E)-5-(3-Hydroxy-2,3-Dimethylbicyclo[2.2.1]Hept-2-Yl)-2-Methyl-2-Pentenoic Acid	1.174e-07	6.457e-06	1.9178	1.9013	0.8435	-0.2456	yes	down
138	metab_7278	Organic acids and derivatives	Carboxylic acids and derivatives	Amino acids, peptides, and analogues	1-Pyrroline-5-Carboxylic Acid	9.669e-08	5.712e-06	1.9149	1.9127	1.2272	0.2953	yes	up
139	metab_9657	-	-	-	7-Hydroxy-3(4-Methoxyphenyl)Coumarin	2.504e-07	1.168e-05	1.9145	1.9022	1.1899	0.2509	yes	up
140	metab_4218	Lipids and lipid-like molecules	Fatty Acyls	Eicosanoids	Mg(0:0/Pge2/0:0)	1.643e-06	5.339e-05	1.9081	1.8834	1.1776	0.2359	yes	up
141	metab_1441	Lipids and lipid-like molecules	Fatty Acyls	Fatty acids and conjugates	Dihomo-Gamma-Linolenic Acid	0.001998	0.008255	1.9073	1.9216	1.3428	0.4252	yes	up
142	metab_11646	Phenylpropanoids and polyketides	Isoflavonoids	O-methylated isoflavonoids	Biochanin A	2.4e-08	1.787e-06	1.9011	1.8895	1.1448	0.1951	yes	up
143	metab_4446	Phenylpropanoids and polyketides	Flavonoids	Flavonoid glycosides	Baicalin	0.001293	0.006101	1.8888	1.8948	1.2311	0.2999	yes	up
144	metab_4914	Lipids and lipid-like molecules	Fatty Acyls	Fatty acid esters	4-Hydroxyhexanoycarnitine	0.004803	0.01573	1.883	1.8904	1.3161	0.3963	yes	up
145	metab_4722	-	-	-	1-(2,4-Dihydroxyquinolin-3-Yl)Ethan-1-One	0.003765	0.01309	1.8773	1.8864	1.2467	0.3181	yes	up
146	metab_9660	Benzenoids	Phenols	Benzenediols	4-Hexylresorcinol	4.547e-05	0.0005959	1.8705	1.8723	0.7882	-0.3433	yes	down
147	metab_13320	Organic acids and derivatives	Carboxylic acids and derivatives	Amino acids, peptides, and analogues	Telotristat	2.455e-05	0.0003931	1.8614	1.8768	0.8349	-0.2603	yes	down
148	metab_4721	Nucleosides, nucleotides, and analogues	5''-deoxyribonucleosides	Not Available	5'-Deoxy-5-Fluorocytidine	0.002268	0.009052	1.8525	1.8583	1.1927	0.2542	yes	up
149	metab_11303	-	-	-	7-Hydroxy-2'-Methoxyisoflavone	4.071e-09	4.562e-07	1.8524	1.843	1.0976	0.1343	yes	up
150	metab_1214	-	-	-	Glu Leu	7.084e-06	0.0001595	1.8495	1.859	0.8624	-0.2135	yes	down
151	metab_11305	Phenylpropanoids and polyketides	Flavonoids	Flavans	(2R,3R)-Pinobanksin	1.016e-08	9.371e-07	1.8347	1.8268	1.1302	0.1766	yes	up
152	metab_1431	-	-	-	3-(Naphthalen-1-Ylmethyl)-1H-Pyrazolo[3,4-D]Pyrimidin-4-Amine	0.00873	0.02455	1.8317	1.8526	0.7267	-0.4606	yes	down
153	metab_9252	Phenylpropanoids and polyketides	Flavonoids	Flavonoid glycosides	Liquiritin	1.028e-05	0.0002076	1.8234	1.8378	1.1892	0.25	yes	up
154	metab_4724	Benzenoids	Phenols	4-alkoxyphenols	4-Hydroxy-Alprenolol	0.002459	0.009588	1.8209	1.8253	1.3171	0.3974	yes	up
155	metab_11994	Organoheterocyclic compounds	Naphthofurans	Not Available	Marasmal	1.12e-09	1.658e-07	1.8173	1.8082	0.8685	-0.2033	yes	down
156	metab_8984	Phenylpropanoids and polyketides	Flavonoids	Flavans	Norartocarpanone	2.452e-05	0.0003931	1.8135	1.7858	1.1925	0.254	yes	up
157	metab_4880	Benzenoids	Phenols	Tyrosols and derivatives	Betaxolol	0.004813	0.01575	1.8118	1.7907	1.2602	0.3336	yes	up
158	metab_12034	Phenylpropanoids and polyketides	Coumarins and derivatives	Furanocoumarins	(3S,7R)-16-Hydroxy-11-Methoxy-6,8,19-Trioxapentacyclo[10.7.0.02,9.03,7.013,17]Nonadeca-1,4,9,11,13(17)-Pentaen-18-One	3.601e-07	1.542e-05	1.8108	1.8074	1.1754	0.2332	yes	up
159	metab_2452	Lipids and lipid-like molecules	Fatty Acyls	Fatty alcohols	1-Acetoxy-2-Hydroxy-16-Heptadecyn-4-One	0.0008581	0.004538	1.8093	1.7755	1.2001	0.2631	yes	up
160	metab_4173	Phenylpropanoids and polyketides	Coumarins and derivatives	Furanocoumarins	Isoimperatorin	6.857e-05	0.000796	1.807	1.7992	1.1483	0.1996	yes	up
161	metab_9254	Lipids and lipid-like molecules	Fatty Acyls	Fatty acids and conjugates	Undecylenic Acid	0.0001267	0.001231	1.8047	1.7916	1.1645	0.2197	yes	up
162	metab_14317	Organic oxygen compounds	Organooxygen compounds	Carbohydrates and carbohydrate conjugates	Ethyl Glucuronide	1.319e-09	1.819e-07	1.8034	1.7947	1.2002	0.2632	yes	up
163	metab_7265	Lipids and lipid-like molecules	Fatty Acyls	Fatty acyl glycosides	L-Ascorbic Acid 2-Glucoside	2.777e-07	1.257e-05	1.7931	1.7946	1.1849	0.2448	yes	up
164	metab_5607	Phenylpropanoids and polyketides	Flavonoids	Flavonoid glycosides	Naringenin 5-Rhamnoside	2.421e-06	7.258e-05	1.7902	1.7863	1.1557	0.2087	yes	up
165	metab_8077	Organoheterocyclic compounds	Isoindoles and derivatives	Isoindolines	5-Hydroxy-3-(4-Hydroxyphenyl)-6-Methoxy-7-[(2S,4S,5S)-3,4,5-Trihydroxy-6-(Hydroxymethyl)Oxan-2-Yl]Oxychromen-4-One	0.0009154	0.004746	1.7895	1.7718	0.8271	-0.2739	yes	down
166	metab_4680	Alkaloids and derivatives	Ajmaline-sarpagine alkaloids	Not Available	17-O-Acetylnorajmaline	1.699e-07	8.598e-06	1.786	1.7828	0.8493	-0.2357	yes	down
167	metab_7024	Organic acids and derivatives	Carboxylic acids and derivatives	Amino acids, peptides, and analogues	Gamma-Glutamylglutamic Acid	5.774e-07	2.27e-05	1.7857	1.7905	0.8534	-0.2287	yes	down
168	metab_1017	Nucleosides, nucleotides, and analogues	Purine nucleosides	Purine 2''-deoxyribonucleosides	2-Amino-9-[(2R,4S,5R)-5-(Hydroperoxymethyl)-4-Hydroxyoxolan-2-Yl]-1H-Purin-6-One	0.0009166	0.004748	1.7652	1.7887	0.8381	-0.2549	yes	down
169	metab_1591	Lipids and lipid-like molecules	Glycerolipids	Diradylglycerols	Dg(10:0/10:0/0:0)	0.002928	0.01096	1.765	1.7812	0.8102	-0.3037	yes	down
170	metab_5403	Benzenoids	Benzene and substituted derivatives	Benzoic acids and derivatives	4-Aminobenzoate	3.928e-07	1.64e-05	1.7618	1.7465	1.1472	0.1982	yes	up
171	metab_9137	Lipids and lipid-like molecules	Fatty Acyls	Fatty acids and conjugates	Traumatic Acid	4.098e-05	0.0005542	1.7607	1.7418	1.205	0.2691	yes	up
172	metab_11297	-	-	-	8-(3-Oxo-2-(Pent-2-Enyl) Cyclopentenyl)Octanoic Acid	0.0001366	0.001303	1.7589	1.7574	0.8711	-0.1991	yes	down
173	metab_1630	-	-	-	3-Desoxy-3,4-Methylenedioxy Pyrovalerone	0.006236	0.01905	1.7587	1.7659	1.2606	0.3341	yes	up
174	metab_4973	Benzenoids	Tetralins	Not Available	Nepicastat	2.02e-05	0.0003416	1.7578	1.7672	1.2269	0.2951	yes	up
175	metab_9316	Phenylpropanoids and polyketides	Isoflavonoids	Isoflavonoid C-glycosides	Puerarin	6.003e-07	2.337e-05	1.7575	1.7606	1.1552	0.2082	yes	up
176	metab_9124	-	-	-	Methyl 2-(2,6-Dihydroxy-4-Methylbenzoyl)-3,5-Dihydroxybenzoate	0.001752	0.0075	1.7574	1.7434	1.2278	0.296	yes	up
177	metab_1720	-	-	-	4,7-Dihydroxyflavone	0.006666	0.02003	1.7533	1.7885	1.3307	0.4122	yes	up
178	metab_1428	-	-	-	Triisopropanolamine	5.075e-05	0.0006417	1.7505	1.7233	1.2022	0.2656	yes	up
179	metab_9885	-	-	-	13-Hydroxyoctadeca-6,9,11-Trienoic Acid	5.477e-05	0.0006807	1.7486	1.7497	0.8888	-0.1701	yes	down
180	metab_2839	Lipids and lipid-like molecules	Steroids and steroid derivatives	Hydroxysteroids	Corticosterone	0.005455	0.01728	1.7484	1.7135	1.1818	0.241	yes	up
181	metab_2013	Phenylpropanoids and polyketides	Flavonoids	Flavonoid glycosides	Apigenin 7-Di-O-Xyloside	0.0007165	0.003995	1.7421	1.738	1.1883	0.2489	yes	up
182	metab_11872	Lipids and lipid-like molecules	Prenol lipids	Terpene lactones	Helenalin	0.0001608	0.001457	1.7412	1.7425	0.8503	-0.234	yes	down
183	metab_1929	-	-	-	4-Methyl-N-(2-Propan-2-Yl-[1,2,4]Triazolo[1,5-A]Pyridin-8-Yl)Benzamide	0.005016	0.01622	1.7401	1.7462	0.7916	-0.3372	yes	down
184	metab_4738	Phenylpropanoids and polyketides	Macrolides and analogues	Not Available	Ethylene Brassylate	0.001466	0.006626	1.7349	1.7224	0.8134	-0.2979	yes	down
185	metab_1751	-	-	-	4-Oxo-4-(3-Oxodecan-2-Ylamino)Butanoic Acid	0.0001155	0.001161	1.7335	1.7321	0.8274	-0.2733	yes	down
186	metab_13027	Lipids and lipid-like molecules	Fatty Acyls	Fatty acyl glycosides	(E)-2-Methyl-2-Buten-1-Ol O-Beta-D-Glucopyranoside	0.003814	0.0132	1.7262	1.709	1.2157	0.2818	yes	up
187	metab_9701	Phenylpropanoids and polyketides	Flavonoids	Hydroxyflavonoids	Apigenidin	0.0005478	0.003316	1.722	1.7073	1.2056	0.2697	yes	up
188	metab_9435	-	-	-	2,6-Di-Tert-Butyl-4-Nitrophenol	0.0001083	0.00111	1.719	1.7167	1.1947	0.2567	yes	up
189	metab_4386	Organic acids and derivatives	Carboxylic acids and derivatives	Amino acids, peptides, and analogues	Valacyclovir	0.00099	0.005024	1.7181	1.7177	0.8114	-0.3014	yes	down
190	metab_2102	-	-	-	7-Beta-Hydroxylathyrol	0.0001084	0.00111	1.7171	1.6868	0.8531	-0.2291	yes	down
191	metab_11491	Lipids and lipid-like molecules	Fatty Acyls	Fatty acids and conjugates	3-Methyl-5-Pentyl-2-Furanheptanoic Acid	9.992e-05	0.00104	1.7167	1.7174	0.8658	-0.2079	yes	down
192	metab_13886	Alkaloids and derivatives	Harmala alkaloids	Not Available	(1R*,3R*,3'S*)-1,2,3,4-Tetrahydro-1-(2-Thio-3-Pyrrolidinyl)-Beta-Carboline-3-Carboxylic Acid	5.874e-06	0.0001423	1.7113	1.7143	0.8611	-0.2157	yes	down
193	metab_428	-	-	-	Aceclidine	0.002378	0.009377	1.7112	1.6848	1.2077	0.2723	yes	up
194	metab_10069	Lipids and lipid-like molecules	Fatty Acyls	Fatty acyl glycosides	9-Hydroxy-7-Megastigmen-3-One Glucoside	6.949e-07	2.588e-05	1.7046	1.6917	0.8853	-0.1757	yes	down
195	metab_2119	Benzenoids	Benzene and substituted derivatives	Benzoyl derivatives	4-Methoxybenzaldehyde	3.396e-05	0.000493	1.7023	1.6936	1.1574	0.2108	yes	up
196	metab_7096	Organic acids and derivatives	Carboxylic acids and derivatives	Carboxylic acids	3-Iodopropanoic Acid	0.0003408	0.002399	1.7023	1.6903	0.8513	-0.2322	yes	down
197	metab_11378	Benzenoids	Anthracenes	Anthraquinones	Rubiadin	0.0001088	0.001113	1.7013	1.7056	1.1358	0.1837	yes	up
198	metab_8986	Organoheterocyclic compounds	Benzopyrans	1-benzopyrans	Baicalein	1.548e-05	0.0002822	1.6988	1.6766	1.201	0.2642	yes	up
199	metab_2107	Benzenoids	Benzene and substituted derivatives	Phenylpropanes	(2S,3S)-2-(2,4-Difluorophenyl)-3-Methylsulfonyl-1-(1,2,4-Triazol-1-Yl)Butan-2-Ol	3.179e-09	3.737e-07	1.6912	1.6833	1.123	0.1673	yes	up
200	metab_4185	-	-	-	3,7-Dihydroxyflavone	2.561e-06	7.584e-05	1.6901	1.6763	1.1481	0.1993	yes	up
201	metab_7375	Organic oxygen compounds	Organooxygen compounds	Alcohols and polyols	Quinic Acid	0.02432	0.05349	1.6814	1.6665	1.295	0.3729	yes	up
202	metab_11495	Lipids and lipid-like molecules	Prenol lipids	Diterpenoids	Ent-17-Oxo-15-Kauren-19-Oic Acid	3.055e-06	8.722e-05	1.6798	1.6635	0.8684	-0.2035	yes	down
203	metab_9670	-	-	-	3-(4'O-Malonyl)Rha(1-2)Gal(1-2)Glua-Soyasaponenol B	0.003335	0.01199	1.6761	1.696	0.856	-0.2244	yes	down
204	metab_13298	Organoheterocyclic compounds	Lactams	Beta lactams	Imipenem	4.585e-05	0.0005989	1.6761	1.6894	1.138	0.1865	yes	up
205	metab_8714	-	-	-	Tanshinone Iia Sulfonate	0.01977	0.04562	1.6706	1.6424	1.2258	0.2937	yes	up
206	metab_1604	Lipids and lipid-like molecules	Steroids and steroid derivatives	Hydroxysteroids	Cortisone	0.000714	0.003986	1.6686	1.6454	1.1879	0.2484	yes	up
207	metab_9906	-	-	-	Pe(16:1/0:0)	0.003403	0.01216	1.6669	1.649	1.1935	0.2552	yes	up
208	metab_9359	Phenylpropanoids and polyketides	Flavonoids	Flavans	Liquiritigenin	2.05e-07	9.991e-06	1.6669	1.6569	1.124	0.1686	yes	up
209	metab_3840	Not Available	Not Available	Not Available	Mg(20:5(5Z,8Z,11Z,14Z,16E)-Oh(18)/0:0/0:0)	7.516e-06	0.0001666	1.666	1.654	1.1342	0.1816	yes	up
210	metab_2792	Lipids and lipid-like molecules	Steroids and steroid derivatives	Pregnane steroids	17-Hydroxyprogesterone	0.01505	0.03701	1.6659	1.6268	1.1738	0.2312	yes	up
211	metab_7260	Lipids and lipid-like molecules	Fatty Acyls	Fatty acids and conjugates	2-Hydroxyadipic Acid	3.678e-05	0.0005207	1.663	1.6528	1.1854	0.2454	yes	up
212	metab_5835	-	-	-	2-(4-Methoxybenzoyl)-3-(2-Thienyl)Acrylonitrile	0.0001452	0.001359	1.6629	1.661	1.1541	0.2068	yes	up
213	metab_7831	Organoheterocyclic compounds	Imidazopyrimidines	Purines and purine derivatives	Tenofovir Disoproxil	0.0002252	0.001819	1.6624	1.6788	0.8547	-0.2265	yes	down
214	metab_1883	Organoheterocyclic compounds	Naphthopyrans	Not Available	Borapetoside	0.002632	0.01015	1.6612	1.6935	1.2328	0.302	yes	up
215	metab_9709	-	-	-	5-O-Methylbiochanin A	0.001421	0.006499	1.661	1.6721	1.1761	0.234	yes	up
216	metab_9646	-	-	-	2-Hydroxyanthraquinone	4.952e-09	5.398e-07	1.6576	1.6483	1.1358	0.1837	yes	up
217	metab_9521	-	-	-	2'-Methoxyformonetin	0.000122	0.001204	1.6517	1.6455	1.1439	0.1939	yes	up
218	metab_4863	-	-	-	Glu Trp	1.322e-06	4.542e-05	1.6506	1.6497	0.8575	-0.2218	yes	down
219	metab_8449	Nucleosides, nucleotides, and analogues	Purine nucleosides	Not Available	7-Methylxanthosine	0.0002033	0.001696	1.6463	1.6583	1.1529	0.2052	yes	up
220	metab_9647	Phenylpropanoids and polyketides	Flavonoids	Flavones	Resokaempherol	4.886e-08	3.15e-06	1.6441	1.6329	1.1364	0.1845	yes	up
221	metab_4334	Phenylpropanoids and polyketides	Isoflavonoids	Furanoisoflavonoids	Medicarpin 3-O-(6'-Malonylglucoside)	0.01382	0.03473	1.644	1.6716	1.2286	0.297	yes	up
222	metab_4396	Organoheterocyclic compounds	Isobenzofurans	Not Available	Ligustilide	3.152e-05	0.0004678	1.6424	1.6334	1.172	0.229	yes	up
223	metab_11972	-	-	-	Isosulochrin	2.301e-07	1.095e-05	1.6371	1.6293	1.1451	0.1955	yes	up
224	metab_9996	Lipids and lipid-like molecules	Fatty Acyls	Fatty acid esters	3-Hydroxytridecanoyl Carnitine	0.0001505	0.001394	1.6367	1.6165	0.8707	-0.1998	yes	down
225	metab_12495	Phenylpropanoids and polyketides	Flavonoids	Flavans	Eriodictyol	6.755e-05	0.0007887	1.6348	1.611	1.1657	0.2213	yes	up
226	metab_4621	-	-	-	Cardamonin	3.839e-06	0.0001029	1.6286	1.6253	1.1678	0.2238	yes	up
227	metab_10048	Benzenoids	Phenols	Methoxyphenols	Capsiate	0.0003678	0.002517	1.6258	1.6296	0.8828	-0.1799	yes	down
228	metab_11597	Lipids and lipid-like molecules	Prenol lipids	Sesquiterpenoids	Abscisic Alcohol	2.217e-05	0.0003643	1.6248	1.6045	0.8731	-0.1958	yes	down
229	metab_9016	Lipids and lipid-like molecules	Fatty Acyls	Fatty acyl glycosides	Prenyl Glucoside	0.001878	0.007896	1.6243	1.5944	1.1835	0.243	yes	up
230	metab_11714	Phenylpropanoids and polyketides	Cinnamic acids and derivatives	Hydroxycinnamic acids and derivatives	P-Coumaroyltriacetic Acid Lactone	1.479e-08	1.258e-06	1.6212	1.6115	1.0988	0.1359	yes	up
231	metab_7554	Lipids and lipid-like molecules	Fatty Acyls	Fatty acids and conjugates	Citraconic Acid	6.778e-06	0.0001545	1.6182	1.6296	1.1502	0.2019	yes	up
232	metab_8831	Organoheterocyclic compounds	Lactones	Gamma butyrolactones	2-Carboxy-5,7-Dimethyl-4-Octanolide	0.007718	0.02231	1.6119	1.5878	1.1819	0.2411	yes	up
233	metab_9527	Phenylpropanoids and polyketides	Flavonoids	Flavonoid glycosides	Neocarthamin	5.353e-06	0.0001321	1.6118	1.6257	1.1529	0.2052	yes	up
234	metab_1680	Organic nitrogen compounds	Organonitrogen compounds	Guanidines	Imidacloprid	0.001833	0.007763	1.6092	1.6197	0.8357	-0.259	yes	down
235	metab_9369	Lipids and lipid-like molecules	Fatty Acyls	Eicosanoids	Pgf2A Ethanolamide	0.002979	0.01109	1.6059	1.6241	1.2163	0.2825	yes	up
236	metab_9455	-	-	-	Juniperoside Iii	3.513e-06	9.661e-05	1.6033	1.5956	0.8629	-0.2127	yes	down
237	metab_12263	-	-	-	2',6-Dihydroxyflavanone	0.001202	0.00578	1.5931	1.5725	1.1397	0.1886	yes	up
238	metab_11325	Not Available	Not Available	Not Available	Dg(Pgd1/0:0/I-13:0)	0.0004557	0.002888	1.5906	1.5747	0.8887	-0.1702	yes	down
239	metab_4190	-	-	-	4'-Hydroxy-5-Methoxyflavone	5.718e-08	3.628e-06	1.5891	1.5783	1.0755	0.105	yes	up
240	metab_1619	Benzenoids	Phenol ethers	Not Available	Esmolol	0.02251	0.05041	1.5881	1.5608	1.2283	0.2967	yes	up
241	metab_13180	Organic acids and derivatives	Carboxylic acids and derivatives	Amino acids, peptides, and analogues	Glutamyltryptophan	0.0001165	0.001167	1.5823	1.5855	0.8712	-0.1989	yes	down
242	metab_11500	-	-	-	9-Oxootre	7.266e-05	0.0008314	1.5804	1.5809	0.896	-0.1584	yes	down
243	metab_4569	Organic oxygen compounds	Organooxygen compounds	Carbonyl compounds	Adlupulone	0.02779	0.05932	1.5729	1.5535	1.2305	0.2993	yes	up
244	metab_9469	-	-	-	Histamine-Trifluoromethyltoluide	0.000335	0.002377	1.5719	1.5835	0.8697	-0.2014	yes	down
245	metab_9578	Lipids and lipid-like molecules	Fatty Acyls	Fatty acyl glycosides	Blumenol C Glucoside	1.608e-05	0.0002886	1.5689	1.565	0.8958	-0.1587	yes	down
246	metab_5765	Organic acids and derivatives	Carboxylic acids and derivatives	Amino acids, peptides, and analogues	Oxiracetam	3.132e-06	8.921e-05	1.5633	1.5422	1.1425	0.1922	yes	up
247	metab_12138	Benzenoids	Benzene and substituted derivatives	Diphenylethers	Fenoprofen	3.136e-05	0.0004659	1.5615	1.5577	1.1458	0.1964	yes	up
248	metab_5488	Organic acids and derivatives	Carboxylic acids and derivatives	Amino acids, peptides, and analogues	Dl-Asparagine	2.03e-05	0.0003426	1.5572	1.5439	1.0926	0.1277	yes	up
249	metab_9872	Benzenoids	Fluorenes	Not Available	Fluorenylmethyl Chloroformate	0.0005052	0.003108	1.5571	1.571	1.1548	0.2076	yes	up
250	metab_13346	Lipids and lipid-like molecules	Steroids and steroid derivatives	Hydroxysteroids	16Alpha-Hydroxyprednisolone	0.003283	0.01186	1.5571	1.524	1.1537	0.2063	yes	up
251	metab_11712	-	-	-	Pratol	1.345e-08	1.204e-06	1.5489	1.5398	1.0709	0.0989	yes	up
252	metab_9478	Lipids and lipid-like molecules	Prenol lipids	Sesquiterpenoids	Eremopetasidione	0.0004453	0.002843	1.5468	1.5502	0.8916	-0.1655	yes	down
253	metab_1951	Phenylpropanoids and polyketides	Coumarins and derivatives	Not Available	4-Methylcoumarin	0.002171	0.008802	1.5409	1.5606	1.2397	0.31	yes	up
254	metab_9343	Organic oxygen compounds	Organooxygen compounds	Alcohols and polyols	(3S)-3-Hydroxycyclocitral	1.597e-08	1.314e-06	1.5396	1.5328	0.9199	-0.1204	yes	down
255	metab_9652	Phenylpropanoids and polyketides	Flavonoids	Flavans	3-O-Acetylpinobanksin	1.137e-07	6.314e-06	1.5361	1.5304	1.1215	0.1655	yes	up
256	metab_9101	-	-	-	Maesopsin	6.412e-05	0.0007647	1.5338	1.5191	1.1349	0.1825	yes	up
257	metab_13814	Organoheterocyclic compounds	Thienopyrimidines	Not Available	(S)-5-(4-Hydroxy-4-Methylisoxazolidine-2-Carbonyl)-1-Isopropyl-3-Methyl-6-((3-Methyl-5-(Trifluoromethyl)-1H-Pyrazol-4-Yl)Methyl)Thieno[2,3-D]Pyrimidine-2,4(1H,3H)-Dione	0.004883	0.0159	1.5324	1.5368	1.1321	0.179	yes	up
258	metab_12046	Organoheterocyclic compounds	Diazanaphthalenes	Benzodiazines	1,2,3,9-Tetrahydropyrrolo[2,1-B]Quinazolin-3-Ol	0.02455	0.05381	1.5321	1.5147	0.8134	-0.298	yes	down
259	metab_7524	Organic acids and derivatives	Carboxylic acids and derivatives	Amino acids, peptides, and analogues	Citiolone	0.005585	0.01759	1.5314	1.523	1.1845	0.2443	yes	up
260	metab_11523	Lipids and lipid-like molecules	Fatty Acyls	Eicosanoids	15-Keto-Prostaglandin E2	4.198e-07	1.718e-05	1.5306	1.5239	0.9059	-0.1426	yes	down
261	metab_1898	Organic oxygen compounds	Organooxygen compounds	Carbonyl compounds	(Z)-3-Oxo-2-(2-Pentenyl)-1-Cyclopenteneacetic Acid	4.746e-05	0.0006146	1.5274	1.513	1.1435	0.1935	yes	up
262	metab_4342	Phenylpropanoids and polyketides	Linear 1,3-diarylpropanoids	Cinnamylphenols	2'-O-Methylisoliquiritigenin	0.0004212	0.00274	1.525	1.5386	1.1227	0.167	yes	up
263	metab_11455	Organoheterocyclic compounds	Azoles	Pyrazoles	2-[(4-Hydroxycyclohexyl)Amino]-4-(3,6,6-Trimethyl-4-Oxo-5,7-Dihydroindazol-1-Yl)Benzamide	3.085e-05	0.0004613	1.5237	1.502	0.8866	-0.1736	yes	down
264	metab_11503	Not Available	Not Available	Not Available	Dg(13:0/20:4(7E,9E,11Z,13E)-3Oh(5S,6R,15S)/0:0)	0.001939	0.008071	1.521	1.5358	0.8646	-0.2099	yes	down
265	metab_1425	-	-	-	Strophanthidin Semicarbazide	0.002383	0.009383	1.5201	1.5209	0.87	-0.2009	yes	down
266	metab_7387	Homogeneous non-metal compounds	Non-metal oxoanionic compounds	Non-metal phosphates	Phosphate	0.001638	0.007163	1.5183	1.5291	0.8616	-0.2149	yes	down
267	metab_12168	-	-	-	Haematoxylin	0.001333	0.006229	1.5178	1.4939	1.1294	0.1755	yes	up
268	metab_7670	Lipids and lipid-like molecules	Fatty Acyls	Fatty acids and conjugates	2-Hydroxy-3-Methylbutyric Acid	1.159e-06	4.042e-05	1.5172	1.5239	1.1239	0.1686	yes	up
269	metab_3911	Organic nitrogen compounds	Organonitrogen compounds	Amines	Alpha-Linolenoyl Ethanolamide	0.0009351	0.004813	1.5169	1.5015	0.884	-0.1779	yes	down
270	metab_7026	Organic acids and derivatives	Carboxylic acids and derivatives	Amino acids, peptides, and analogues	Histidine Glutamate	5.966e-06	0.0001438	1.5102	1.4951	1.1263	0.1716	yes	up
271	metab_10271	Lignans, neolignans and related compounds	Dibenzylbutane lignans	Not Available	Niranthin	0.0395	0.07839	1.5095	1.5299	0.8165	-0.2925	yes	down
272	metab_4306	Lipids and lipid-like molecules	Prenol lipids	Terpene lactones	Atractylenolide Iii	0.000941	0.004837	1.5089	1.5201	0.8648	-0.2095	yes	down
273	metab_1930	-	-	-	4',6-Dihydroxyflavone	0.0002553	0.001978	1.5033	1.5	1.1383	0.1869	yes	up
274	metab_14530	Organic acids and derivatives	Hydroxy acids and derivatives	Medium-chain hydroxy acids and derivatives	Gulonic Acid	8.262e-06	0.0001781	1.5013	1.4985	1.0803	0.1115	yes	up
275	metab_14387	Organic oxygen compounds	Organooxygen compounds	Carbohydrates and carbohydrate conjugates	Lactulose	0.002817	0.01066	1.4912	1.4903	1.1295	0.1757	yes	up
276	metab_1663	Organic oxygen compounds	Organooxygen compounds	Carbonyl compounds	Embelin	0.0007023	0.003943	1.4887	1.4825	0.8695	-0.2018	yes	down
277	metab_11682	Lipids and lipid-like molecules	Fatty Acyls	Fatty acids and conjugates	9,10-Epoxyoctadecanoic Acid	0.0003363	0.002381	1.4864	1.4773	0.8973	-0.1564	yes	down
278	metab_1927	-	-	-	6,4'-Dihydroxyflavone	0.0001229	0.00121	1.4824	1.4791	1.092	0.127	yes	up
279	metab_1578	Alkaloids and derivatives	Camptothecins	Not Available	Sn-38	4.628e-07	1.856e-05	1.4774	1.4644	1.1105	0.1513	yes	up
280	metab_3891	Lipids and lipid-like molecules	Fatty Acyls	Eicosanoids	Prostaglandin J2	5.17e-06	0.000129	1.4748	1.4679	0.9027	-0.1477	yes	down
281	metab_9571	-	-	-	Pechueloic Acid	0.004074	0.01388	1.4742	1.4974	0.8551	-0.2258	yes	down
282	metab_4991	Lipids and lipid-like molecules	Prenol lipids	Monoterpenoids	Carvone	1.714e-05	0.0003051	1.4735	1.4748	1.1252	0.1702	yes	up
283	metab_4546	Lipids and lipid-like molecules	Prenol lipids	Sesquiterpenoids	Tanacetol A	6.741e-05	0.0007887	1.4722	1.4656	0.888	-0.1714	yes	down
284	metab_12506	Organic acids and derivatives	Carboxylic acids and derivatives	Amino acids, peptides, and analogues	2-Amino-N-[1-[[2-[[1-(2-Hydroxyethylamino)-1-Oxo-3-Phenylpropan-2-Yl]-Methylamino]-2-Oxoethyl]Amino]-1-Oxopropan-2-Yl]-3-(4-Hydroxyphenyl)Propanamide	0.002984	0.0111	1.471	1.4865	1.1083	0.1484	yes	up
285	metab_11178	Lipids and lipid-like molecules	Fatty Acyls	Fatty acids and conjugates	Ricinoleic Acid	7.858e-06	0.0001713	1.4684	1.4694	0.9126	-0.132	yes	down
286	metab_5003	-	-	-	Swainsonine	0.002082	0.008538	1.4653	1.4659	0.8863	-0.1741	yes	down
287	metab_5621	-	-	-	Glu Glu	0.0002566	0.001983	1.4641	1.4751	0.8852	-0.1759	yes	down
288	metab_1893	Lipids and lipid-like molecules	Prenol lipids	Monoterpenoids	Dihydrocarvone	0.000125	0.001218	1.4622	1.4406	1.1541	0.2068	yes	up
289	metab_9434	Lipids and lipid-like molecules	Prenol lipids	Diterpenoids	Tanshinol A	0.01071	0.02865	1.4611	1.4767	1.2036	0.2674	yes	up
290	metab_2550	Lipids and lipid-like molecules	Steroids and steroid derivatives	Androstane steroids	11-Hydroxyandrosterone	0.002399	0.009429	1.4606	1.4335	1.1256	0.1707	yes	up
291	metab_1254	Organic oxygen compounds	Organooxygen compounds	Alcohols and polyols	N-(1-Deoxy-1-Fructosyl)Isoleucine	0.0003044	0.002238	1.4601	1.4651	1.1228	0.1671	yes	up
292	metab_1054	Organoheterocyclic compounds	Diazanaphthalenes	Benzodiazines	Remdesivir	2.795e-06	8.175e-05	1.4571	1.4574	1.082	0.1136	yes	up
293	metab_11273	-	-	-	Pgk2	1.949e-07	9.616e-06	1.4562	1.4426	0.9248	-0.1129	yes	down
294	metab_10339	-	-	-	Cer[As](D34:1)	3e-05	0.0004514	1.4561	1.4486	0.9183	-0.1229	yes	down
295	metab_11962	Lipids and lipid-like molecules	Prenol lipids	Terpene lactones	Tatridin B	3.266e-05	0.0004799	1.4556	1.4544	0.8967	-0.1572	yes	down
296	metab_559	Organic acids and derivatives	Carboxylic acids and derivatives	Amino acids, peptides, and analogues	Oxaceprol	2.095e-05	0.0003499	1.4553	1.4612	1.1076	0.1474	yes	up
297	metab_9750	Phenylpropanoids and polyketides	Macrolides and analogues	Epothilones and analogues	Epothilone D	0.02226	0.04993	1.4545	1.4883	0.8406	-0.2505	yes	down
298	metab_4392	Lipids and lipid-like molecules	Prenol lipids	Terpene lactones	Alantolactone	7.298e-05	0.0008343	1.4508	1.4487	0.8937	-0.1622	yes	down
299	metab_852	Organoheterocyclic compounds	Furans	Furoic acid and derivatives	2,5-Furandicarboxylic Acid	0.04568	0.08809	1.4489	1.4678	0.8237	-0.2798	yes	down
300	metab_1960	Organic oxygen compounds	Organooxygen compounds	Carbohydrates and carbohydrate conjugates	Validamycin A	0.008774	0.02464	1.448	1.4656	1.1363	0.1843	yes	up
301	metab_11422	Lipids and lipid-like molecules	Fatty Acyls	Fatty acids and conjugates	9(10)-Epode	0.001158	0.005626	1.4479	1.4445	0.9213	-0.1182	yes	down
302	metab_4314	-	-	-	3-Fluoro-4-Methoxy-N-([1,2,4]Triazolo[4,3-A]Pyridin-8-Yl)Benzamide	0.00056	0.00337	1.4432	1.4232	1.1089	0.1491	yes	up
303	metab_459	Organoheterocyclic compounds	Lactams	Beta lactams	4-Oxo-2-Azetidinecarboxylic Acid	9.155e-05	0.0009785	1.4425	1.4308	1.1061	0.1455	yes	up
304	metab_8175	Organoheterocyclic compounds	Naphthopyrans	Not Available	Pc-M6	0.0004482	0.002859	1.4423	1.4351	0.8986	-0.1543	yes	down
305	metab_11658	-	-	-	Fa(18:5+2O)	0.0003016	0.002226	1.4386	1.438	0.9066	-0.1414	yes	down
306	metab_3844	Organoheterocyclic compounds	Tetrahydrofurans	Not Available	Obtusilactone A	0.00945	0.02611	1.4377	1.4019	1.1318	0.1786	yes	up
307	metab_4321	Organic oxygen compounds	Organooxygen compounds	Carbonyl compounds	Oxyglutinosone	0.002728	0.01039	1.437	1.4524	0.8585	-0.2202	yes	down
308	metab_8367	Benzenoids	Benzene and substituted derivatives	Biphenyls and derivatives	Sacubitrilat	0.0006595	0.003784	1.433	1.4312	0.8976	-0.1559	yes	down
309	metab_5821	Organic acids and derivatives	Carboxylic acids and derivatives	Amino acids, peptides, and analogues	L-Asparagine	4.696e-05	0.000611	1.4297	1.4179	1.0792	0.1099	yes	up
310	metab_11631	Lipids and lipid-like molecules	Fatty Acyls	Lineolic acids and derivatives	Corchorifatty Acid A	0.0001248	0.001217	1.4293	1.4299	0.9075	-0.14	yes	down
311	metab_11963	Phenylpropanoids and polyketides	Flavonoids	Flavones	7,4'-Dihydroxyflavone	0.000204	0.001698	1.4259	1.4275	1.0864	0.1195	yes	up
312	metab_3829	Lipids and lipid-like molecules	Steroids and steroid derivatives	Androstane steroids	Oxymesterone	0.0001608	0.001457	1.4219	1.4085	0.8996	-0.1527	yes	down
313	metab_7391	Nucleosides, nucleotides, and analogues	Ribonucleoside 3''-phosphates	Not Available	Adenosine 3'-Monophosphate	0.0007049	0.003948	1.4176	1.4374	0.8966	-0.1575	yes	down
314	metab_11696	Organic oxygen compounds	Organooxygen compounds	Alcohols and polyols	2,4,5,7Alpha-Tetrahydro-1,4,4,7A-Tetramethyl-1H-Inden-2-Ol	0.01005	0.02741	1.4172	1.4306	0.876	-0.1911	yes	down
315	metab_9782	-	-	-	16-Hydroxy-9-Oxooctadeca-10,12,14-Trienoic Acid	1.604e-05	0.0002884	1.4167	1.4117	0.9253	-0.1121	yes	down
316	metab_8617	Lipids and lipid-like molecules	Fatty Acyls	Fatty acyl glycosides	Pantoyllactone Glucoside	1.78e-05	0.0003135	1.4166	1.4163	1.103	0.1415	yes	up
317	metab_14028	Organic acids and derivatives	Keto acids and derivatives	Short-chain keto acids and derivatives	2-Keto-Glutaramic Acid	0.01728	0.04124	1.415	1.3727	1.1686	0.2248	yes	up
318	metab_426	Organic acids and derivatives	Carboxylic acids and derivatives	Amino acids, peptides, and analogues	L-Argininium(1+)	6.013e-05	0.000733	1.4139	1.4043	1.0811	0.1125	yes	up
319	metab_5637	Organic acids and derivatives	Carboxylic acids and derivatives	Amino acids, peptides, and analogues	Glycylproline	0.0001342	0.001286	1.4127	1.4076	1.1196	0.163	yes	up
320	metab_3726	Lipids and lipid-like molecules	Glycerophospholipids	Glycerophosphocholines	Lysopc(20:5(5Z,8Z,11Z,14Z,17Z)/0:0)	0.009537	0.02632	1.4107	1.3886	0.8881	-0.1713	yes	down
321	metab_10034	Organic oxygen compounds	Organooxygen compounds	Carbonyl compounds	(Z)-3-Methyl-2-(2-Pentenyl)-2-Cyclopenten-1-One	3.352e-08	2.337e-06	1.4098	1.4014	0.9263	-0.1105	yes	down
322	metab_10960	-	-	-	Oleoyl-L-Alpha-Lysophosphatidic Acid	0.007397	0.02161	1.4065	1.4252	0.8772	-0.1891	yes	down
323	metab_760	Organic acids and derivatives	Carboxylic acids and derivatives	Amino acids, peptides, and analogues	2-Amino-4-[Carbamimidoyl(Methyl)Amino]Butanoic Acid	3.224e-05	0.0004761	1.4062	1.3949	1.0798	0.1107	yes	up
324	metab_11213	Lipids and lipid-like molecules	Steroids and steroid derivatives	Hydroxysteroids	(8S,9S,10S,11S,13S,14S,17R)-11,17-Dihydroxy-17-(2-Hydroxyacetyl)-10,13-Dimethyl-1,4,5,6,7,8,9,11,12,14,15,16-Dodecahydrocyclopenta[A]Phenanthrene-2,3-Dione	7.833e-06	0.0001711	1.4032	1.3937	0.9221	-0.1169	yes	down
325	metab_2189	-	-	-	Bakkenolide A	3.406e-06	9.522e-05	1.4031	1.4006	0.909	-0.1376	yes	down
326	metab_2357	-	-	-	3-[[4-[1-(Pyridin-3-Ylmethyl)Piperidin-4-Yl]Oxypiperidin-1-Yl]Methyl]Pyridine	0.00013	0.001251	1.4027	1.387	1.087	0.1203	yes	up
327	metab_7462	Nucleosides, nucleotides, and analogues	Purine nucleosides	Not Available	Guanosine	0.0001977	0.001666	1.4026	1.4108	0.9292	-0.1059	yes	down
328	metab_1824	-	-	-	Cycloheptyl-(4-Hydroxy-1-Oxa-9-Azaspiro[5.5]Undecan-9-Yl)Methanone	0.0006126	0.003601	1.4025	1.3914	0.9054	-0.1434	yes	down
329	metab_1497	Alkaloids and derivatives	Tropane alkaloids	Not Available	Ipratropium Bromide	0.004087	0.01392	1.402	1.394	0.8764	-0.1903	yes	down
330	metab_5237	Lipids and lipid-like molecules	Sphingolipids	Glycosphingolipids	Guanosine 2',3'-Cyclic Phosphate	0.04803	0.0914	1.4005	1.413	0.8643	-0.2103	yes	down
331	metab_4372	-	-	-	2,5-Dimethyl-N-(2-Propan-2-Yl-[1,2,4]Triazolo[1,5-A]Pyridin-8-Yl)Benzamide	0.008849	0.02476	1.3975	1.4043	0.864	-0.2109	yes	down
332	metab_10046	-	-	-	7,2'-Dihydroxyflavone	1.969e-05	0.0003373	1.3964	1.3834	1.0764	0.1063	yes	up
333	metab_13438	Lipids and lipid-like molecules	Fatty Acyls	Fatty acids and conjugates	Desthiobiotin	0.0003167	0.002294	1.3949	1.3755	1.1292	0.1753	yes	up
334	metab_3879	-	-	-	5-Alpha-Pregnan-3-Beta,17,21-Triol-11,20-Dione	0.001608	0.00707	1.3905	1.3665	1.1002	0.1377	yes	up
335	metab_4344	Lipids and lipid-like molecules	Fatty Acyls	Eicosanoids	Prostaglandin F1A	0.003548	0.01252	1.3886	1.4041	1.1185	0.1615	yes	up
336	metab_13051	Phenylpropanoids and polyketides	Flavonoids	Flavonoid glycosides	Tricin 7-Neohesperidoside	0.006337	0.01928	1.3878	1.406	1.1308	0.1773	yes	up
337	metab_4482	-	-	-	13,14-Dihydro-15(R,S)-Hydroxy-16,16-Difluoro Prostaglandin E1-D4	0.031	0.06469	1.3874	1.3844	1.1758	0.2337	yes	up
338	metab_662	Organic acids and derivatives	Carboxylic acids and derivatives	Amino acids, peptides, and analogues	Glycine, L-G-Glutamyl-L-Cysteinyl-, 3-Methyl Ester	7.186e-06	0.0001614	1.3852	1.3832	1.0921	0.1272	yes	up
339	metab_12119	Lipids and lipid-like molecules	Fatty Acyls	Fatty acids and conjugates	Undecanedioic Acid	0.0001435	0.001355	1.3767	1.3582	1.0909	0.1255	yes	up
340	metab_14042	Benzenoids	Benzene and substituted derivatives	Sulfanilides	Indisulam	0.01788	0.04227	1.3746	1.3871	0.8662	-0.2072	yes	down
341	metab_11997	Lipids and lipid-like molecules	Fatty Acyls	Fatty acids and conjugates	3-Carboxy-4-Methyl-5-Pentyl-2-Furanpropanoic Acid	3.544e-08	2.429e-06	1.3745	1.3676	0.9164	-0.126	yes	down
342	metab_1671	Organic acids and derivatives	Carboxylic acids and derivatives	Amino acids, peptides, and analogues	L-Cysteine	0.03483	0.07104	1.3733	1.4049	1.2494	0.3212	yes	up
343	metab_13137	-	-	-	Dihydrobenzoic Acid Pentose	0.04774	0.09102	1.3729	1.362	0.8611	-0.2157	yes	down
344	metab_11461	Lipids and lipid-like molecules	Fatty Acyls	Fatty acids and conjugates	Coronaric Acid	0.0002957	0.002193	1.371	1.3642	0.9284	-0.1072	yes	down
345	metab_9272	Lipids and lipid-like molecules	Prenol lipids	Sesquiterpenoids	Abscisic Acid	5.284e-07	2.091e-05	1.3698	1.3677	0.9067	-0.1413	yes	down
346	metab_4568	Lipids and lipid-like molecules	Steroids and steroid derivatives	Steroid esters	[(8R,9S,13S,14S,17S)-17-Hydroxy-13-Methyl-6,7,8,9,11,12,14,15,16,17-Decahydrocyclopenta[A]Phenanthren-3-Yl] 3-Cyclopentylpropanoate	0.03693	0.0745	1.3688	1.3566	1.1873	0.2477	yes	up
347	metab_9895	-	-	-	Grandifloric Acid	0.0001237	0.001213	1.3677	1.3583	0.9171	-0.1248	yes	down
348	metab_10042	-	-	-	Oroxylin A	5.758e-05	0.0007082	1.3658	1.3663	1.0672	0.0938	yes	up
349	metab_4164	-	-	-	Verrucarol	0.01476	0.03647	1.363	1.3711	0.8754	-0.192	yes	down
350	metab_4045	-	-	-	N-Cyclopentyl-1-[6-(4-Methylphenyl)Pyridazin-3-Yl]Piperidine-3-Carboxamide	0.003721	0.01297	1.3608	1.3471	1.1068	0.1464	yes	up
351	metab_11499	-	-	-	6,7,8-Triphenyl-2,3-Dihydro[1,2,4]Triazolo[4,3-B]Pyridazin-3-One	0.0004425	0.002833	1.3602	1.3706	0.8993	-0.1531	yes	down
352	metab_2069	Lipids and lipid-like molecules	Prenol lipids	Terpene lactones	Costunolide	0.0001534	0.001409	1.3595	1.3618	0.9077	-0.1397	yes	down
353	metab_5400	Nucleosides, nucleotides, and analogues	Ribonucleoside 3''-phosphates	Not Available	Uridine 3'-Monophosphate	0.001078	0.005352	1.3593	1.3658	0.8988	-0.1539	yes	down
354	metab_10222	Lipids and lipid-like molecules	Sphingolipids	Ceramides	Cer(D18:1/12:0)	0.000179	0.001565	1.359	1.3576	0.9224	-0.1166	yes	down
355	metab_14653	Organic acids and derivatives	Carboxylic acids and derivatives	Amino acids, peptides, and analogues	3-Cyano-L-Alanine	3.897e-07	1.634e-05	1.358	1.3513	1.0798	0.1108	yes	up
356	metab_8336	Organic oxygen compounds	Organooxygen compounds	Carbohydrates and carbohydrate conjugates	(2S)-2-Butanol O-[B-D-Apiofuranosyl-(1->6)-B-D-Glucopyranoside]	0.007198	0.02115	1.3569	1.3558	1.1386	0.1873	yes	up
357	metab_1618	Lipids and lipid-like molecules	Prenol lipids	Diterpenoids	(3S,5R,6R)-3,5-Dihydroxy-6,7-Didehydro-5,6-Dihydro-12'-Apo-Beta-Caroten-12'-Al	0.01448	0.03594	1.3541	1.333	1.1187	0.1619	yes	up
358	metab_4712	Organoheterocyclic compounds	Diazines	Pyrazines	Ethylisopropylamiloride	0.02525	0.05497	1.3541	1.3203	1.1572	0.2106	yes	up
359	metab_579	Organic acids and derivatives	Carboxylic acids and derivatives	Amino acids, peptides, and analogues	L-Proline	2.926e-06	8.454e-05	1.351	1.3487	1.0764	0.1062	yes	up
360	metab_9433	Phenylpropanoids and polyketides	Isoflavonoids	Not Available	(-)-Medicarpin	0.0007506	0.004127	1.3509	1.3667	1.0969	0.1334	yes	up
361	metab_1675	Organic acids and derivatives	Carboxylic acids and derivatives	Amino acids, peptides, and analogues	Phenylalanylphenylalanine	0.04601	0.08855	1.3495	1.3466	0.822	-0.2827	yes	down
362	metab_11307	Organoheterocyclic compounds	Lactones	Gamma butyrolactones	5-Heptyltetrahydro-2-Oxo-3-Furancarboxylic Acid	1.396e-08	1.231e-06	1.3486	1.3388	0.9371	-0.0938	yes	down
363	metab_4558	Organoheterocyclic compounds	Dihydrofurans	Furanones	Zilascorb	0.04109	0.08101	1.348	1.3452	0.8355	-0.2593	yes	down
364	metab_1833	Organoheterocyclic compounds	Pteridines and derivatives	Alloxazines and isoalloxazines	Lumichrome	1.477e-08	1.258e-06	1.3457	1.3364	1.0867	0.1199	yes	up
365	metab_11131	-	-	-	Iaa-94	0.00416	0.01411	1.345	1.3273	0.859	-0.2193	yes	down
366	metab_11526	Lipids and lipid-like molecules	Prenol lipids	Sesquiterpenoids	Zerumbone	0.02962	0.06237	1.3436	1.3864	0.8297	-0.2693	yes	down
367	metab_1051	Organoheterocyclic compounds	Diazines	Pyrimidines and pyrimidine derivatives	Tezacitabine	4.504e-06	0.0001162	1.3433	1.3455	1.0642	0.0898	yes	up
368	metab_12533	-	-	-	6-Chloro-2-Picolinic Acid	0.0001622	0.001463	1.3411	1.3525	0.8841	-0.1777	yes	down
369	metab_4390	-	-	-	5-[4-(4-Ethylpiperazine-1-Carbonyl)Piperidin-1-Yl]-2-Propylpyridazin-3-One	8.568e-05	0.0009357	1.3404	1.3361	0.913	-0.1313	yes	down
370	metab_2172	Lipids and lipid-like molecules	Steroids and steroid derivatives	Estrane steroids	19-Norandrostenedione	0.001005	0.005081	1.3387	1.3375	0.9085	-0.1385	yes	down
371	metab_7550	Nucleosides, nucleotides, and analogues	Nucleoside and nucleotide analogues	Not Available	Pseudouridine	5.79e-05	0.0007114	1.3379	1.339	0.9259	-0.111	yes	down
372	metab_11385	Lipids and lipid-like molecules	Prenol lipids	Triterpenoids	Forskolin	0.03519	0.07163	1.3377	1.3354	0.8727	-0.1965	yes	down
373	metab_2094	-	-	-	5,4'-Dimethoxy-7-Hydroxyflavone	7.24e-05	0.0008293	1.3373	1.3362	1.0737	0.1026	yes	up
374	metab_1813	Phenylpropanoids and polyketides	Flavonoids	Flavonoid glycosides	Phloretin 2'-O-Glucuronide	0.0163	0.03943	1.3368	1.3451	1.186	0.2461	yes	up
375	metab_9322	Organic acids and derivatives	Carboxylic acids and derivatives	Amino acids, peptides, and analogues	4-Ethoxymethylene-2-Phenyl-2-Oxazolin-5-One	7.823e-06	0.0001711	1.3362	1.3309	1.0877	0.1213	yes	up
376	metab_7082	Organic acids and derivatives	Peptidomimetics	Hybrid peptides	Bis-Gamma-Glutamylcysteinylbis-Beta-Alanine	1.331e-05	0.0002522	1.3329	1.3339	1.0819	0.1136	yes	up
377	metab_11950	Phenylpropanoids and polyketides	Flavonoids	O-methylated flavonoids	Diosmetin	0.0003234	0.002322	1.3312	1.3148	1.0744	0.1035	yes	up
378	metab_9851	Organic nitrogen compounds	Organonitrogen compounds	Amines	Biperiden	0.02693	0.05792	1.3281	1.3584	0.8586	-0.2199	yes	down
379	metab_6729	Organic acids and derivatives	Organic carbonic acids and derivatives	Ureas	3-Ureidopropionic Acid	9.712e-07	3.466e-05	1.3267	1.32	1.0634	0.0887	yes	up
380	metab_8009	-	-	-	Phenolphthalin	0.002896	0.01088	1.3198	1.2948	0.9111	-0.1344	yes	down
381	metab_1486	Alkaloids and derivatives	Lupin alkaloids	Lupinine-type alkaloids	Lupinic Acid	0.001893	0.007929	1.3192	1.3279	0.8942	-0.1613	yes	down
382	metab_11632	-	-	-	2,4-Dihydroxy-3,5,6-Trimethylbenzoic Acid	0.005655	0.01777	1.3123	1.3316	0.8701	-0.2008	yes	down
383	metab_622	Nucleosides, nucleotides, and analogues	Pyrimidine nucleotides	Cyclic pyrimidine nucleotides	Cifostodine	0.002688	0.0103	1.3067	1.3056	0.9047	-0.1445	yes	down
384	metab_4888	Nucleosides, nucleotides, and analogues	Purine nucleosides	Not Available	N6-Carbamoyl-L-Threonyladenosine	9.453e-05	0.0009996	1.3048	1.2959	1.0956	0.1317	yes	up
385	metab_1902	-	-	-	5-Methoxy-Dl-Tryptophan	0.04082	0.08061	1.3025	1.2959	0.8635	-0.2116	yes	down
386	metab_8674	Phenylpropanoids and polyketides	Flavonoids	Flavans	Dihydrokaempferol	0.0005767	0.003449	1.3014	1.303	0.901	-0.1504	yes	down
387	metab_11147	Lipids and lipid-like molecules	Sphingolipids	Glycosphingolipids	As 1-1	1.756e-06	5.557e-05	1.2989	1.2919	0.9415	-0.087	yes	down
388	metab_11293	-	-	-	Gamma-13(S)-Hpotre	8.264e-05	0.000908	1.2984	1.3051	0.9421	-0.086	yes	down
389	metab_9046	Organoheterocyclic compounds	Diazines	Pyrimidines and pyrimidine derivatives	Methohexital	0.02514	0.05479	1.2978	1.2824	0.8893	-0.1692	yes	down
390	metab_2228	Benzenoids	Benzene and substituted derivatives	Biphenyls and derivatives	Amarogentin	0.0275	0.05884	1.2969	1.2576	0.8955	-0.1592	yes	down
391	metab_9855	Lipids and lipid-like molecules	Fatty Acyls	Fatty acyl glycosides	5,7-Megastigmadien-9-Ol Glucoside	2.078e-05	0.0003486	1.2967	1.2885	0.9314	-0.1025	yes	down
392	metab_632	Organic acids and derivatives	Keto acids and derivatives	Medium-chain keto acids and derivatives	(S)-5-Amino-3-Oxohexanoate	3.696e-06	0.0001005	1.295	1.3005	1.0905	0.1249	yes	up
393	metab_4025	Lipids and lipid-like molecules	Fatty Acyls	Eicosanoids	Thromboxane B2	0.009524	0.02629	1.2941	1.2646	1.106	0.1453	yes	up
394	metab_11745	Lipids and lipid-like molecules	Fatty Acyls	Fatty alcohols	Falcarindiol	0.003345	0.01201	1.2939	1.3091	0.9108	-0.1348	yes	down
395	metab_11318	Lipids and lipid-like molecules	Fatty Acyls	Lineolic acids and derivatives	9,10-Epoxystearic Acid	0.0001573	0.001437	1.2932	1.2974	0.9416	-0.0868	yes	down
396	metab_12189	Phenylpropanoids and polyketides	Linear 1,3-diarylpropanoids	Chalcones and dihydrochalcones	Phloretin	0.0001808	0.001574	1.2923	1.2756	1.0786	0.1091	yes	up
397	metab_9011	Benzenoids	Naphthalenes	Naphthalene sulfonic acids and derivatives	2-Naphthalenesulfonic Acid	1.27e-05	0.0002441	1.2874	1.2843	0.9136	-0.1304	yes	down
398	metab_4238	-	-	-	Lychnopholic Acid	0.0001237	0.001213	1.2862	1.2933	0.9086	-0.1383	yes	down
399	metab_10492	Phenylpropanoids and polyketides	Flavonoids	O-methylated flavonoids	Isokaempferide	0.0004867	0.003026	1.286	1.274	1.1078	0.1476	yes	up
400	metab_6728	Lipids and lipid-like molecules	Fatty Acyls	Fatty acids and conjugates	Maleamic Acid	1.598e-06	5.208e-05	1.2851	1.2782	1.0739	0.1029	yes	up
401	metab_4998	Organoheterocyclic compounds	Piperidines	Not Available	4-Hydroxy-2,2,6,6-Tetramethylpiperidine-1-Oxyl	0.0009084	0.00473	1.283	1.2743	1.1058	0.145	yes	up
402	metab_1819	Organic acids and derivatives	Carboxylic acids and derivatives	Amino acids, peptides, and analogues	Hypoglycin B	0.04258	0.08334	1.2817	1.2718	0.8552	-0.2256	yes	down
403	metab_1719	Benzenoids	Benzene and substituted derivatives	Benzylethers	Bisoprolol	0.002552	0.009887	1.2792	1.2733	0.9003	-0.1515	yes	down
404	metab_1597	Organic acids and derivatives	Carboxylic acids and derivatives	Amino acids, peptides, and analogues	Bursin	0.005191	0.01665	1.2765	1.2852	0.9133	-0.1309	yes	down
405	metab_5720	Organic acids and derivatives	Organic phosphoric acids and derivatives	Phosphate esters	Dimethyl Phosphate	0.001276	0.006055	1.2696	1.2692	0.9097	-0.1366	yes	down
406	metab_9377	Benzenoids	Anthracenes	Anthraquinones	Purpurin	0.0001566	0.001432	1.2665	1.2783	1.0887	0.1226	yes	up
407	metab_9837	-	-	-	13-Hpotre	3.954e-05	0.0005413	1.2651	1.2694	0.9448	-0.082	yes	down
408	metab_11267	Lipids and lipid-like molecules	Fatty Acyls	Eicosanoids	Thromboxane B3	0.01532	0.03758	1.2642	1.275	0.9	-0.152	yes	down
409	metab_9859	Lipids and lipid-like molecules	Fatty Acyls	Lineolic acids and derivatives	9(S)-Hotre	0.01132	0.02997	1.2611	1.2454	0.89	-0.1681	yes	down
410	metab_4690	Organic acids and derivatives	Carboxylic acids and derivatives	Amino acids, peptides, and analogues	Arginyltryptophan	0.007932	0.02277	1.2556	1.2366	1.1028	0.1411	yes	up
411	metab_10076	-	-	-	11-Dehydro-Txb3	0.003812	0.0132	1.2542	1.2645	0.9115	-0.1337	yes	down
412	metab_4802	Organic acids and derivatives	Carboxylic acids and derivatives	Amino acids, peptides, and analogues	N-Octanoyl-L-Homoserine Lactone	0.000292	0.002172	1.2508	1.2367	1.0984	0.1354	yes	up
413	metab_9504	Organic oxygen compounds	Organooxygen compounds	Carbohydrates and carbohydrate conjugates	5A,6A-Epoxy-7E-Megastigmene-3A,9E-Diol 3-Glucoside	0.0001734	0.001532	1.2428	1.2485	0.9271	-0.1093	yes	down
414	metab_5329	-	-	-	3-Morpholin-4-Yl-1-Propan-2-Ylpyrazin-2-One	0.01461	0.03616	1.2417	1.2239	1.098	0.1349	yes	up
415	metab_4469	Organoheterocyclic compounds	Quinolines and derivatives	Quinolones and derivatives	Zanthodioline	0.03795	0.07608	1.2412	1.2244	0.89	-0.1682	yes	down
416	metab_835	-	-	-	1-Aminocyclobutane Carboxylic Acid	1.459e-06	4.895e-05	1.2403	1.2384	1.0611	0.0856	yes	up
417	metab_11110	Lipids and lipid-like molecules	Sphingolipids	Glycosphingolipids	As 1-2	0.0001163	0.001166	1.2401	1.2343	0.9352	-0.0966	yes	down
418	metab_9245	Phenylpropanoids and polyketides	Tannins	Hydrolyzable tannins	Castacrenin B	0.001207	0.00579	1.2399	1.2536	0.916	-0.1266	yes	down
419	metab_4657	Organoheterocyclic compounds	Piperidines	Piperidinones	Cycloheximide	0.0003185	0.002301	1.2399	1.2366	1.0795	0.1104	yes	up
420	metab_11915	-	-	-	20-Carboxy-Ltb4	8.743e-05	0.0009471	1.237	1.2381	0.9348	-0.0973	yes	down
421	metab_8864	Nucleosides, nucleotides, and analogues	5''-deoxyribonucleosides	Not Available	5'-Deoxy-5-Fluorouridine	0.03942	0.07829	1.2272	1.2234	0.8866	-0.1736	yes	down
422	metab_7801	Organic acids and derivatives	Carboxylic acids and derivatives	Amino acids, peptides, and analogues	(R)-2-Amino-3-(2-Propynylthio)Propanoic Acid	0.001658	0.007235	1.2272	1.2279	1.0884	0.1222	yes	up
423	metab_9078	Lipids and lipid-like molecules	Fatty Acyls	Fatty acids and conjugates	Traumatin	0.000313	0.002283	1.221	1.2129	0.9149	-0.1284	yes	down
424	metab_9345	Organoheterocyclic compounds	Tetrapyrroles and derivatives	Porphyrins	Inosine 2',3'-Cyclic Phosphate	0.02303	0.05137	1.2208	1.209	0.8909	-0.1666	yes	down
425	metab_9173	Organoheterocyclic compounds	Benzodiazepines	Not Available	4'-Hydroxyclobazam	0.0355	0.07216	1.22	1.2225	1.1291	0.1752	yes	up
426	metab_13909	Organic nitrogen compounds	Organonitrogen compounds	N-arylamides	2,6-Diamino-4-Hydroxy-5-Formamidopyrimidine	1.326e-05	0.0002517	1.2172	1.2196	0.933	-0.1	yes	down
427	metab_7766	Organic oxygen compounds	Organooxygen compounds	Carbohydrates and carbohydrate conjugates	Simmondsin	0.0007556	0.004143	1.2156	1.2187	1.0835	0.1156	yes	up
428	metab_2494	Lipids and lipid-like molecules	Fatty Acyls	Eicosanoids	Lipoxin A4	0.0003033	0.002232	1.2137	1.1947	1.0752	0.1046	yes	up
429	metab_3647	Lipids and lipid-like molecules	Fatty Acyls	Fatty acids and conjugates	15-Methylpalmitate	0.004241	0.01429	1.2126	1.1951	0.9188	-0.1221	yes	down
430	metab_4339	Not Available	Not Available	Not Available	Oxonol	0.003442	0.01226	1.212	1.2288	1.1022	0.1404	yes	up
431	metab_9953	Lipids and lipid-like molecules	Glycerophospholipids	Glycerophosphoethanolamines	Lpe(16:0)	0.007707	0.02229	1.2081	1.1969	0.9145	-0.129	yes	down
432	metab_11399	Lipids and lipid-like molecules	Glycerophospholipids	Glycerophosphoethanolamines	Lpe(18:1)	0.00601	0.01856	1.2078	1.2071	0.9196	-0.121	yes	down
433	metab_10347	Lipids and lipid-like molecules	Fatty Acyls	Fatty acids and conjugates	Cerebronic Acid	0.006692	0.02009	1.2077	1.2029	1.0996	0.137	yes	up
434	metab_4728	-	-	-	7-Methyl-9-[1-(2-Phenylacetyl)Piperidin-4-Yl]Purin-8-One	0.002404	0.009443	1.2026	1.1962	0.9219	-0.1172	yes	down
435	metab_14008	Organic acids and derivatives	Carboxylic acids and derivatives	Amino acids, peptides, and analogues	O-Succinyl-L-Homoserine	6.287e-06	0.0001478	1.2002	1.1962	0.9311	-0.103	yes	down
436	metab_4610	Lipids and lipid-like molecules	Fatty Acyls	Fatty acid esters	Nona-3,5,7-Trienoylcarnitine	0.01761	0.04181	1.1937	1.1703	1.0978	0.1346	yes	up
437	metab_9876	Organic oxygen compounds	Organic oxides	Not Available	Polygodial	2.151e-05	0.0003572	1.1935	1.1733	0.9221	-0.117	yes	down
438	metab_14616	Organic acids and derivatives	Carboxylic acids and derivatives	Amino acids, peptides, and analogues	Ala-Gly	0.0002193	0.001786	1.1928	1.2056	0.9342	-0.0982	yes	down
439	metab_2133	-	-	-	Kaempferol 3,7,4'-Trimethyl Ether	0.01473	0.03641	1.1916	1.1693	0.9051	-0.1438	yes	down
440	metab_13867	-	-	-	Coptisine	3.908e-05	0.0005381	1.1916	1.1964	1.0507	0.0713	yes	up
441	metab_13752	Organic acids and derivatives	Carboxylic acids and derivatives	Amino acids, peptides, and analogues	N(2)-Phenylacetyl-L-Glutaminate	0.002381	0.00938	1.1912	1.206	1.0904	0.1249	yes	up
442	metab_9543	Organoheterocyclic compounds	Heteroaromatic compounds	Not Available	3-(4-Methyl-3-Pentenyl)Thiophene	0.01139	0.0301	1.1869	1.1859	0.8979	-0.1553	yes	down
443	metab_4492	Lipids and lipid-like molecules	Fatty Acyls	Fatty acid esters	Nonanedioylcarnitine	9.001e-05	0.0009663	1.1863	1.1768	1.0718	0.1	yes	up
444	metab_11585	-	-	-	11A-Hydroxy-3,6,10-Trimethyl-6,7,8,11-Tetrahydro-4H-Cyclodeca[B]Furan-2,5-Dione	0.003967	0.01359	1.184	1.1647	1.0945	0.1302	yes	up
445	metab_1738	Benzenoids	Benzene and substituted derivatives	Phenylpropanes	Malonoben	7.411e-08	4.557e-06	1.1834	1.1835	0.9405	-0.0885	yes	down
446	metab_5826	Organoheterocyclic compounds	Pyrrolidines	Pyrrolidones	2-Pyrrolidinone	2.211e-06	6.798e-05	1.1816	1.1758	1.0615	0.0861	yes	up
447	metab_13188	Phenylpropanoids and polyketides	Flavonoids	Flavonoid glycosides	Leucopelargonidin 3-O-Alpha-L-Rhamno-Beta-D-Glucopyranoside	0.001933	0.00805	1.1797	1.2038	1.0781	0.1085	yes	up
448	metab_9688	Organic oxygen compounds	Organooxygen compounds	Carbohydrates and carbohydrate conjugates	B-D-Xylopyranosyl-(1->4)-A-L-Rhamnopyranosyl-(1->2)-L-Arabinose	0.0001602	0.001455	1.1789	1.1605	0.9345	-0.0978	yes	down
449	metab_8359	-	-	-	Okanin-4'-O-Glucoside	0.04827	0.09169	1.1786	1.1557	0.9104	-0.1355	yes	down
450	metab_281	Organic acids and derivatives	Carboxylic acids and derivatives	Amino acids, peptides, and analogues	L-Ornithine	0.04384	0.08528	1.1766	1.1303	1.1471	0.198	yes	up
451	metab_5238	Benzenoids	Benzene and substituted derivatives	Phenylpropanes	Levonordefrin	0.001439	0.00655	1.1759	1.1569	0.9238	-0.1144	yes	down
452	metab_2776	Lipids and lipid-like molecules	Prenol lipids	Diterpenoids	Annoglabasin C	0.0004511	0.002871	1.1749	1.1523	1.0614	0.086	yes	up
453	metab_8019	Organic acids and derivatives	Carboxylic acids and derivatives	Amino acids, peptides, and analogues	Dopaxanthin	0.02745	0.05874	1.1718	1.1828	1.1085	0.1486	yes	up
454	metab_2976	Lipids and lipid-like molecules	Prenol lipids	Terpene glycosides	Suspensolide F	0.01135	0.03003	1.1696	1.1451	1.0842	0.1167	yes	up
455	metab_13971	-	-	-	Guanidylic Acid (Guanosine Monophosphate)	0.005162	0.01658	1.1677	1.1812	0.9213	-0.1183	yes	down
456	metab_9263	Organoheterocyclic compounds	Benzofurans	Not Available	5-Hydroxybenzofuran-2(3H)-One	0.001231	0.005881	1.1672	1.1573	1.077	0.107	yes	up
457	metab_5598	Organoheterocyclic compounds	Piperidines	Not Available	Pelletierine	0.008624	0.02434	1.1672	1.154	0.9227	-0.1161	yes	down
458	metab_9499	Phenylpropanoids and polyketides	Flavonoids	O-methylated flavonoids	Isosakuranetin	0.0009135	0.004742	1.1669	1.1537	1.0623	0.0872	yes	up
459	metab_4288	Phenylpropanoids and polyketides	Isoflavonoids	O-methylated isoflavonoids	Prunetin	0.002587	0.01001	1.1655	1.1701	1.0661	0.0923	yes	up
460	metab_2684	Lipids and lipid-like molecules	Prenol lipids	Diterpenoids	Aphidicolin	0.0001599	0.001453	1.1654	1.1573	1.0631	0.0883	yes	up
461	metab_1437	Organic acids and derivatives	Carboxylic acids and derivatives	Amino acids, peptides, and analogues	Ulimorelin	0.02411	0.05315	1.1651	1.1886	1.1291	0.1751	yes	up
462	metab_9619	Organic oxygen compounds	Organooxygen compounds	Alcohols and polyols	N-Methylsphingosine	0.001299	0.006122	1.1622	1.1568	0.9312	-0.1028	yes	down
463	metab_6921	Organic acids and derivatives	Carboxylic acids and derivatives	Amino acids, peptides, and analogues	Asp-Glu	0.0002196	0.001786	1.1592	1.1739	0.9269	-0.1096	yes	down
464	metab_7362	Organoheterocyclic compounds	Azolidines	Oxazolidines	Dimethadione	3.653e-06	9.956e-05	1.156	1.1523	0.9378	-0.0926	yes	down
465	metab_10860	Lipids and lipid-like molecules	Glycerophospholipids	Glycerophosphoethanolamines	Lysope(18:4(6Z,9Z,12Z,15Z)/0:0)	0.01631	0.03945	1.1558	1.1521	0.9101	-0.1359	yes	down
466	metab_11288	-	-	-	2,3-Dinor Prostaglandin E1	6.592e-05	0.0007788	1.1519	1.1523	0.953	-0.0694	yes	down
467	metab_403	Organic acids and derivatives	Carboxylic acids and derivatives	Amino acids, peptides, and analogues	Ritipenem	0.001049	0.00525	1.1489	1.1435	1.0786	0.1091	yes	up
468	metab_12501	Organoheterocyclic compounds	Indoles and derivatives	Indoles	Bucindolol	2.207e-07	1.063e-05	1.1478	1.1487	0.9368	-0.0942	yes	down
469	metab_7478	-	-	-	Ala Tyr	0.0004163	0.002724	1.1433	1.1244	0.9328	-0.1004	yes	down
470	metab_9438	Lipids and lipid-like molecules	Fatty Acyls	Fatty acids and conjugates	Tetranorprostanedioic Acid	0.0001787	0.001565	1.1431	1.1451	0.9514	-0.0719	yes	down
471	metab_771	Organic acids and derivatives	Carboxylic acids and derivatives	Amino acids, peptides, and analogues	Tilarginine	0.001203	0.005782	1.1412	1.1349	1.0778	0.1081	yes	up
472	metab_14236	Organic acids and derivatives	Carboxylic acids and derivatives	Dicarboxylic acids and derivatives	Malonic Acid	1.587e-05	0.0002871	1.1402	1.1458	1.0559	0.0785	yes	up
473	metab_11464	Lipids and lipid-like molecules	Prenol lipids	Triterpenoids	2,3,23-Triacetylsericic Acid	0.02736	0.0586	1.1371	1.1413	0.9203	-0.1198	yes	down
474	metab_8873	Phenylpropanoids and polyketides	Flavonoids	Flavonoid glycosides	Neoliquiritin	0.006939	0.02063	1.1367	1.169	1.0782	0.1087	yes	up
475	metab_11027	Lipids and lipid-like molecules	Fatty Acyls	Fatty aldehydes	Docosanal	0.01529	0.03753	1.1355	1.1234	1.0949	0.1308	yes	up
476	metab_4024	Lipids and lipid-like molecules	Fatty Acyls	Fatty acids and conjugates	Xi-5-Hydroxydodecanoic Acid	0.0005515	0.003328	1.1347	1.1427	0.9312	-0.1029	yes	down
477	metab_824	Alkaloids and derivatives	Tropane alkaloids	Not Available	Tropinone	6.536e-05	0.000774	1.1336	1.1273	1.0671	0.0937	yes	up
478	metab_10237	Lipids and lipid-like molecules	Glycerophospholipids	Glycerophosphoethanolamines	Pe(22:4(7Z,10Z,13Z,16Z)/18:0)	1.563e-05	0.0002839	1.1299	1.1243	0.957	-0.0635	yes	down
479	metab_5825	Organic acids and derivatives	Carboxylic acids and derivatives	Amino acids, peptides, and analogues	Sarcosine	2.086e-05	0.0003493	1.1275	1.1175	1.057	0.08	yes	up
480	metab_11073	Lipids and lipid-like molecules	Sphingolipids	Glycosphingolipids	Soyacerebroside I	9.602e-06	0.0001975	1.127	1.1173	0.9555	-0.0657	yes	down
481	metab_7721	Benzenoids	Benzene and substituted derivatives	Benzoic acids and derivatives	Ginnalin B	0.03373	0.06925	1.1264	1.1501	1.1125	0.1538	yes	up
482	metab_12828	Lipids and lipid-like molecules	Fatty Acyls	Fatty acids and conjugates	3-(1-Hydroxymethyl-1-Propenyl)Pentanedioic Acid	0.0004096	0.002696	1.1259	1.109	1.075	0.1044	yes	up
483	metab_4029	Benzenoids	Indanes	Not Available	Hematein	0.002107	0.008624	1.1252	1.1282	1.069	0.0963	yes	up
484	metab_11099	Lipids and lipid-like molecules	Glycerophospholipids	Glycerophosphoethanolamines	Pe(P-18:1(11Z)/22:4(7Z,10Z,13Z,16Z))	0.0004491	0.002862	1.1252	1.1262	0.9399	-0.0895	yes	down
485	metab_11034	Lipids and lipid-like molecules	Sphingolipids	Ceramides	Cer(D18:1/14:0)	3.93e-05	0.0005392	1.1248	1.1197	0.9587	-0.0608	yes	down
486	metab_1792	Organic oxygen compounds	Organooxygen compounds	Carbohydrates and carbohydrate conjugates	(-)-Erythro-Anethole Glycol 2-Glucoside	3.691e-05	0.0005215	1.1247	1.1301	0.9326	-0.1006	yes	down
487	metab_9870	Lipids and lipid-like molecules	Fatty Acyls	Eicosanoids	11-Dehydro-Thromboxane B2	0.003902	0.01342	1.1239	1.1318	0.9153	-0.1277	yes	down
488	metab_4222	-	-	-	Heptadecasphinganine	0.0006619	0.003788	1.1225	1.1154	0.9409	-0.0879	yes	down
489	metab_6655	Organic acids and derivatives	Carboxylic acids and derivatives	Amino acids, peptides, and analogues	Dl-Arginine	0.001594	0.007023	1.1218	1.1233	1.0671	0.0936	yes	up
490	metab_9098	-	-	-	Demethyl Medicarpin	0.0006204	0.003633	1.1198	1.1202	1.0798	0.1107	yes	up
491	metab_5588	Organic acids and derivatives	Carboxylic acids and derivatives	Amino acids, peptides, and analogues	Thr-Pro	0.009557	0.02635	1.1186	1.1036	1.0947	0.1306	yes	up
492	metab_5422	Organoheterocyclic compounds	Pyridines and derivatives	Pyridoxines	Pyridoxine	6.332e-05	0.0007578	1.1183	1.124	1.0704	0.0982	yes	up
493	metab_4304	-	-	-	Ici-162,846	0.03464	0.07076	1.1146	1.1358	0.8951	-0.1599	yes	down
494	metab_3906	Lipids and lipid-like molecules	Steroids and steroid derivatives	Estrane steroids	19-Nortestosterone	0.01446	0.03592	1.1134	1.0829	1.0797	0.1106	yes	up
495	metab_12974	Organic acids and derivatives	Carboxylic acids and derivatives	Amino acids, peptides, and analogues	N-[(Ethoxycarbonyl)Methyl)-P-Menthane-3-Carboxamide	0.03447	0.07049	1.1124	1.131	0.8912	-0.1661	yes	down
496	metab_5662	Organic acids and derivatives	Carboxylic acids and derivatives	Amino acids, peptides, and analogues	Cycloleucine	8.715e-05	0.0009459	1.1079	1.126	1.0524	0.0736	yes	up
497	metab_1504	Lipids and lipid-like molecules	Prenol lipids	Terpene glycosides	Isopetasoside	0.02126	0.04819	1.1074	1.0927	1.0939	0.1295	yes	up
498	metab_1451	Lipids and lipid-like molecules	Fatty Acyls	Fatty acid esters	6-Hydroxyheptanoylcarnitine	0.007353	0.02151	1.1067	1.107	1.0841	0.1164	yes	up
499	metab_11694	Lipids and lipid-like molecules	Fatty Acyls	Fatty acids and conjugates	12S-Hht	0.0001253	0.001219	1.1061	1.1072	0.956	-0.065	yes	down
500	metab_12820	Organic oxygen compounds	Organooxygen compounds	Carbonyl compounds	4-Ethyl-2-Hydroxy-3-Methyl-2-Cyclopenten-1-One	0.00145	0.006586	1.1058	1.0943	1.0701	0.0977	yes	up
501	metab_10050	-	-	-	(+/-)13-Hpode	0.001802	0.007661	1.1052	1.115	0.9534	-0.0689	yes	down
502	metab_11101	Lipids and lipid-like molecules	Sphingolipids	Glycosphingolipids	Galactosylceramide (D18:1/14:0)	1.435e-05	0.0002672	1.1046	1.1	0.9602	-0.0586	yes	down
503	metab_3899	Organoheterocyclic compounds	Naphthofurans	Not Available	Cafestol	0.009941	0.02717	1.103	1.1068	0.9225	-0.1163	yes	down
504	metab_785	Organic acids and derivatives	Carboxylic acids and derivatives	Amino acids, peptides, and analogues	L-Threonine	7.277e-06	0.000163	1.0996	1.0879	1.0556	0.078	yes	up
505	metab_9842	Organic oxygen compounds	Organooxygen compounds	Carbohydrates and carbohydrate conjugates	Aspartylglycosamine	0.0006441	0.003719	1.0981	1.0868	0.934	-0.0986	yes	down
506	metab_12842	Organic oxygen compounds	Organooxygen compounds	Carbohydrates and carbohydrate conjugates	P-Cresol Glucuronide	3.705e-05	0.0005215	1.094	1.0795	1.0656	0.0917	yes	up
507	metab_9612	Phenylpropanoids and polyketides	Linear 1,3-diarylpropanoids	Chalcones and dihydrochalcones	Isoliquiritigenin	0.03005	0.06306	1.0932	1.1144	1.0964	0.1327	yes	up
508	metab_9809	Lipids and lipid-like molecules	Steroids and steroid derivatives	Steroidal glycosides	Polypodosaponin	0.01843	0.04329	1.0915	1.119	0.9315	-0.1024	yes	down
509	metab_10054	-	-	-	(11E,15Z)-9,10,13-Trihydroxy-11,15-Octadecadienoic Acid	0.0001932	0.00164	1.0912	1.0854	0.9596	-0.0596	yes	down
510	metab_13122	Organoheterocyclic compounds	Piperidines	Benzylpiperidines	Lavoltidine	0.0008227	0.004412	1.0895	1.0633	0.9353	-0.0964	yes	down
511	metab_11667	Alkaloids and derivatives	Cytochalasans	Cytochalasins	Dihydrocytochalasin B	0.01803	0.04257	1.0895	1.0689	0.939	-0.0908	yes	down
512	metab_13092	Lipids and lipid-like molecules	Fatty Acyls	Fatty acids and conjugates	2-Ethyl-2-Hydroxybutyric Acid	0.001919	0.008011	1.0876	1.1206	1.0883	0.1221	yes	up
513	metab_8177	Nucleosides, nucleotides, and analogues	Pyrimidine nucleotides	Pyrimidine ribonucleotides	Cotinine Glucuronide	0.002946	0.011	1.0867	1.0611	0.9392	-0.0905	yes	down
514	metab_3393	Lipids and lipid-like molecules	Fatty Acyls	Fatty alcohols	Glabranin	0.006802	0.02034	1.0855	1.0868	0.9374	-0.0933	yes	down
515	metab_2359	Phenylpropanoids and polyketides	Coumarins and derivatives	Pyranocoumarins	Marshdimerin	0.02509	0.05472	1.0848	1.1104	0.9203	-0.1198	yes	down
516	metab_3836	Organic oxygen compounds	Organooxygen compounds	Ethers	Quinceoxepine	0.001506	0.006766	1.0845	1.0813	0.9351	-0.0968	yes	down
517	metab_5741	Organic acids and derivatives	Carboxylic acids and derivatives	Amino acids, peptides, and analogues	4-Acetamidobutanoic Acid	0.0001002	0.001043	1.0833	1.0841	1.061	0.0854	yes	up
518	metab_9185	Benzenoids	Benzene and substituted derivatives	Benzoic acids and derivatives	Phthalamic Acid	0.007185	0.02112	1.083	1.0922	0.9157	-0.127	yes	down
519	metab_11838	Lipids and lipid-like molecules	Fatty Acyls	Fatty alcohols	Panaxynol	0.0313	0.06516	1.0769	1.1078	0.9174	-0.1244	yes	down
520	metab_937	-	-	-	3-Cyclopropyl-6-Pyrrolidin-1-Yl-[1,2,4]Triazolo[4,3-B]Pyridazine	0.000524	0.003201	1.07	1.0751	1.0625	0.0875	yes	up
521	metab_7322	Organic oxygen compounds	Organooxygen compounds	Carbohydrates and carbohydrate conjugates	Pseudouridine 5'-Phosphate	0.003799	0.01317	1.0693	1.0783	0.9447	-0.0821	yes	down
522	metab_1066	Organoheterocyclic compounds	Piperidines	Phenylpiperidines	Reduced Haloperidol	0.002151	0.008745	1.0665	1.0705	0.935	-0.097	yes	down
523	metab_1155	-	-	-	Gly Ile Glu	0.001288	0.006087	1.0651	1.0543	1.0693	0.0966	yes	up
524	metab_5839	Organic acids and derivatives	Carboxylic acids and derivatives	Amino acids, peptides, and analogues	Targinine	0.001628	0.007124	1.0645	1.0629	1.064	0.0895	yes	up
525	metab_1799	Organoheterocyclic compounds	Diazinanes	Piperazines	2-[4-[4-(4-Carbamimidoylphenyl)Piperazin-1-Yl]Piperidin-1-Yl]Acetic Acid	0.03442	0.07043	1.0636	1.0467	0.9253	-0.1119	yes	down
526	metab_13860	Benzenoids	Benzene and substituted derivatives	Benzoic acids and derivatives	Leonurine	0.03327	0.06847	1.0618	1.0455	0.9157	-0.1271	yes	down
527	metab_2201	Lipids and lipid-like molecules	Steroids and steroid derivatives	Estrane steroids	Estriol	0.03616	0.07324	1.0598	1.0902	0.9144	-0.1291	yes	down
528	metab_10053	Lipids and lipid-like molecules	Fatty Acyls	Lineolic acids and derivatives	Cibaric Acid	0.003695	0.01291	1.0561	1.07	0.9473	-0.0782	yes	down
529	metab_5347	-	-	-	Gly Leu Glu	0.0002648	0.002028	1.0545	1.047	1.0635	0.0889	yes	up
530	metab_2434	Lipids and lipid-like molecules	Glycerophospholipids	Glycerophosphocholines	Pc(18:3/0:0)	0.03361	0.06908	1.0538	1.0468	0.9227	-0.1161	yes	down
531	metab_12184	-	-	-	9-(Methoxycarbonyl)Dec-9-Enoic Acid	0.003539	0.0125	1.0526	1.0545	0.932	-0.1015	yes	down
532	metab_4354	Lipids and lipid-like molecules	Prenol lipids	Sesquiterpenoids	Dihydrophaseic Acid	0.0001028	0.001062	1.0511	1.0503	0.9396	-0.0899	yes	down
533	metab_12972	Phenylpropanoids and polyketides	Flavonoids	Flavonoid glycosides	Catechin 7-Glucoside	0.00106	0.005284	1.0511	1.0681	1.0651	0.0911	yes	up
534	metab_14481	Organic oxygen compounds	Organooxygen compounds	Carbohydrates and carbohydrate conjugates	Galactaric Acid	0.02028	0.0465	1.0492	1.0779	1.0681	0.0951	yes	up
535	metab_5289	Organoheterocyclic compounds	Pyrazolopyrimidines	Not Available	Pyrazolopyrimidinone	0.0002229	0.001806	1.0491	1.0562	0.9383	-0.0919	yes	down
536	metab_11077	Lipids and lipid-like molecules	Sphingolipids	Ceramides	Cer(D16:1/16:0)	0.0009181	0.004752	1.0442	1.0464	0.9514	-0.0718	yes	down
537	metab_9285	Lipids and lipid-like molecules	Fatty Acyls	Fatty acids and conjugates	Octanoic Acid	0.002178	0.008823	1.0387	1.0502	1.069	0.0963	yes	up
538	metab_10232	Organic oxygen compounds	Organooxygen compounds	Ethers	Heptaethylene Glycol Monododecyl Ether	8.82e-06	0.0001859	1.0358	1.027	0.9586	-0.0609	yes	down
539	metab_1758	Benzenoids	Phenols	Methoxyphenols	Capsaicin	0.049	0.09277	1.0352	1.0541	0.9066	-0.1415	yes	down
540	metab_654	Nucleosides, nucleotides, and analogues	Purine nucleosides	Not Available	N6-Methyladenosine	0.0001919	0.001636	1.0351	1.022	1.0569	0.0798	yes	up
541	metab_6939	Organoheterocyclic compounds	Thiochromanes	Not Available	Meticrane	0.0053	0.0169	1.0346	1.0534	1.0643	0.0899	yes	up
542	metab_5129	-	-	-	N-(4-Fluoro-3-Methylphenyl)-2,4-Dimethyl-1,3-Thiazole-5-Carboxamide	0.001428	0.006518	1.0342	1.038	0.9407	-0.0882	yes	down
543	metab_5272	-	-	-	Isoguanosine	0.003359	0.01204	1.0342	1.0482	0.9543	-0.0675	yes	down
544	metab_14016	-	-	-	Dl-M-Tyrosine	0.000108	0.00111	1.0294	1.0228	0.9479	-0.0771	yes	down
545	metab_5334	Phenylpropanoids and polyketides	Phenylpropanoic acids	Not Available	3,4-Dihydroxyhydrocinnamic Acid	0.001537	0.006874	1.0273	1.0232	0.9408	-0.088	yes	down
546	metab_2031	-	-	-	(4-Cyclohexylpiperazin-1-Yl)-(4-Piperidin-1-Ylquinazolin-6-Yl)Methanone	0.02398	0.05298	1.0265	1.0253	0.9302	-0.1044	yes	down
547	metab_9293	Benzenoids	Benzene and substituted derivatives	Benzoic acids and derivatives	Salicylic Acid	0.0002118	0.001746	1.0265	1.0135	0.9499	-0.0742	yes	down
548	metab_1040	-	-	-	Scopoline	0.001811	0.00769	1.0262	1.0186	0.9458	-0.0804	yes	down
549	metab_831	Nucleosides, nucleotides, and analogues	Purine nucleosides	Not Available	1-Methyladenosine	3.635e-05	0.0005165	1.0252	1.0143	1.0479	0.0675	yes	up
550	metab_9165	Benzenoids	Phenols	Nitrophenols	4-Nitrophenol	1.447e-06	4.888e-05	1.0239	1.0319	1.0576	0.0808	yes	up
551	metab_11727	-	-	-	3-(5-Acetyl-2-Furyl)-5-Methoxy-2-Benzofuran-1(3H)-One	4.249e-05	0.000568	1.0239	1.0147	1.0423	0.0597	yes	up
552	metab_11695	-	-	-	Lactarorufin A	0.002222	0.008916	1.0225	1.0267	0.9527	-0.0698	yes	down
553	metab_6950	Organic acids and derivatives	Carboxylic acids and derivatives	Amino acids, peptides, and analogues	5-L-Glutamyl-L-Alanine	0.0007292	0.004043	1.021	1.0414	0.94	-0.0893	yes	down
554	metab_5188	Organic acids and derivatives	Carboxylic acids and derivatives	Amino acids, peptides, and analogues	Valylproline	0.003169	0.01158	1.021	1.0107	1.0525	0.0739	yes	up
555	metab_8206	Benzenoids	Benzene and substituted derivatives	Benzoic acids and derivatives	6-O-Galloylsucrose	0.01764	0.04181	1.0207	1.0041	1.0802	0.1113	yes	up
556	metab_3892	-	-	-	Pga3	0.0004176	0.002724	1.0178	1.0188	0.9575	-0.0627	yes	down
557	metab_12340	Organoheterocyclic compounds	Lactones	Gamma butyrolactones	5-Hexyltetrahydro-2-Oxo-3-Furancarboxylic Acid	0.00518	0.01662	1.0176	1.0035	1.0669	0.0934	yes	up
558	metab_5214	-	-	-	Ser Leu Asp	0.0001655	0.001483	1.0165	1.0117	1.0548	0.077	yes	up
559	metab_4563	Organoheterocyclic compounds	Benzofurans	Not Available	Bufuralol	0.01823	0.04296	1.0155	1.0166	0.9223	-0.1166	yes	down
560	metab_14485	Organic acids and derivatives	Carboxylic acids and derivatives	Amino acids, peptides, and analogues	Allantoic Acid	0.03761	0.07558	1.0134	1.0224	0.9275	-0.1086	yes	down
561	metab_4639	Organic acids and derivatives	Carboxylic acids and derivatives	Amino acids, peptides, and analogues	Ile-Trp	0.02137	0.04837	1.0093	0.9916	0.9302	-0.1044	yes	down
562	metab_4315	-	-	-	Gliocladic Acid	0.004077	0.01389	1.0089	1.0177	0.9372	-0.0936	yes	down
563	metab_6862	Organic oxygen compounds	Organooxygen compounds	Carbohydrates and carbohydrate conjugates	Gluconolactone	0.002437	0.009532	1.0085	1.0108	0.9518	-0.0713	yes	down
564	metab_1787	Benzenoids	Phenol ethers	Anisoles	Venlafaxine	0.04825	0.09168	1.0083	1.0297	0.9084	-0.1387	yes	down
565	metab_5174	-	-	-	Leu Ala Glu	9.184e-05	0.0009785	1.0058	1.0057	1.0551	0.0774	yes	up
566	metab_11518	-	-	-	(+/-)9-Hpode	0.003048	0.01128	1.0058	1.0156	0.9588	-0.0607	yes	down
567	metab_2122	Lipids and lipid-like molecules	Fatty Acyls	Eicosanoids	16-B1-Phytoprostane	0.001536	0.00687	1.0046	1.0133	0.9563	-0.0645	yes	down
568	metab_10238	Not Available	Not Available	Not Available	Ps(22:6(5Z,8E,10Z,13Z,15E,19Z)-2Oh(7S, 17S)/18:0)	0.003155	0.01155	1.0045	0.9976	0.9473	-0.0781	yes	down
569	metab_761	-	-	-	Dl-4-Hydroxyphenyllactic Acid	0.0002417	0.001903	1.0029	1.0115	1.0616	0.0863	yes	up
570	metab_12057	-	-	-	Jaceosidin	0.001471	0.006645	1.0001	1.0052	0.952	-0.0709	yes	down
