# Supplementary material
Source: Research Square preprint supplement (doi:10.21203/rs.3.rs-9350064/v1)
Supplement: Supplementary file 6 [file c8e233330d33a2c0ce1825dc.xlsx]

## Sheet: Table S2A
Table S2A. Overview of RNA seqeuencing data
Sample	Raw reads	Raw bases	Clean reads	Clean bases	Error rate(%)	Q20(%)	Q30(%)	GC content(%)
TNP_1	45768232	6911003032	45384180	6756948357	0.0123	98.53	95.43	41.66
TNP_2	47649006	7194999906	47276826	7046701645	0.0123	98.57	95.53	41.37
TNP_4	50361378	7604568078	49960140	7452343077	0.0123	98.54	95.46	41.27
TDP_2	45901920	6931189920	45512046	6784701783	0.0124	98.5	95.36	41.49
TDP_3	46566034	7031471134	46183884	6882882507	0.0124	98.5	95.36	41.34
TDP_4	50514990	7627763490	50115270	7477199936	0.0123	98.53	95.46	41.37
TACC1_1	42415938	6404806638	42061964	6262674991	0.0124	98.48	95.25	41.65
TACC1_2	52111872	7868892672	51668714	7694528618	0.0123	98.52	95.43	41.47
TACC1_3	48476732	7319986532	48085704	7167131178	0.0124	98.49	95.31	41.45
TACC10_1	43347530	6545477030	42982764	6394296639	0.0123	98.53	95.44	41.43
TACC10_3	46621996	7039921396	46214304	6882016096	0.0123	98.53	95.46	41.67
TACC10_4	47339810	7148311310	46950156	6991018021	0.0124	98.48	95.31	41.38
TACC100_1	47184876	7124916276	46770184	6974107211	0.0124	98.51	95.41	41.36
TACC100_2	53089348	8016491548	52663896	7835877861	0.0123	98.55	95.51	41.45
TACC100_4	46683364	7049187964	46305208	6883565265	0.0124	98.48	95.28	41.47

## Sheet: Table S2B
Table S2B. Comparison of transcript sequences with alfalfa genome
Sample	Total reads	Total mapped	Multiple mapped	Uniquely mapped
TNP_1	45384180	34592693(76.22%)	2131464(4.7%)	32461229(71.53%)
TNP_2	47276826	35669048(75.45%)	2147078(4.54%)	33521970(70.91%)
TNP_4	49960140	37690113(75.44%)	2388809(4.78%)	35301304(70.66%)
TDP_2	45512046	34213859(75.18%)	2239648(4.92%)	31974211(70.25%)
TDP_3	46183884	34484983(74.67%)	2183626(4.73%)	32301357(69.94%)
TDP_4	50115270	37665520(75.16%)	2487504(4.96%)	35178016(70.19%)
TACC1_1	42061964	31988320(76.05%)	1999947(4.75%)	29988373(71.3%)
TACC1_2	51668714	38928548(75.34%)	2506439(4.85%)	36422109(70.49%)
TACC1_3	48085704	36179599(75.24%)	2325834(4.84%)	33853765(70.4%)
TACC10_1	42982764	32525310(75.67%)	2147408(5.0%)	30377902(70.67%)
TACC10_3	46214304	34946244(75.62%)	2387551(5.17%)	32558693(70.45%)
TACC10_4	46950156	35338506(75.27%)	2470753(5.26%)	32867753(70.01%)
TACC100_1	46770184	34831950(74.47%)	2433400(5.2%)	32398550(69.27%)
TACC100_2	52663896	39232322(74.5%)	2883354(5.48%)	36348968(69.02%)
TACC100_4	46305208	34800279(75.15%)	2416272(5.22%)	32384007(69.94%)
